# Supplementary material for: Identification of differentially expressed methylated genes in melanoma versus nevi using bioinformatics methods
Source: PeerJ. 2020 Jun 3;8:e9273. doi: 10.7717/peerj.9273 (PMC7275674; doi:10.7717/peerj.9273)
Supplement: Supplemental Information 1 [file peerj-08-9273-s001.xlsx]

## Sheet: Sheet1
ID	adj.P.Val	P.Value	t	B	logFC	Gene.symbol	Gene.title	Gene.ID	GenBank.Accession
204086_at	2.38e-06	2.14e-10	8.27497	13.4406	3.63089	PRAME	preferentially expressed antigen in melanoma	23532	NM_006115
200661_at	9.73e-06	3.51e-09	7.41471	10.8391	0.958816	CTSA	cathepsin A	5476	NM_000308
204141_at	1.16e-05	5.01e-09	7.30605	10.5054	1.26956	TUBB2A	tubulin beta 2A class IIa	7280	NM_001069
210042_s_at	1.16e-05	5.73e-09	7.26524	10.3798	1.44988	CTSZ	cathepsin Z	1522	AF073890
218856_at	1.61e-05	9.78e-09	7.10317	9.8797	1.37676	TNFRSF21	TNF receptor superfamily member 21	27242	NM_014452
205916_at	1.61e-05	1.09e-08	7.07152	9.78181	4.15793	S100A7	S100 calcium binding protein A7	6278	NM_002963
217755_at	2.2e-05	1.58e-08	6.95806	9.43037	1.30059	HN1	hematological and neurological expressed 1	51155	NM_016185
222231_s_at	2.6e-05	2.45e-08	6.82541	9.01852	0.943206	LRRC59	leucine rich repeat containing 59	55379
214549_x_at	6.12e-05	7.71e-08	6.48123	7.94588	3.25869	SPRR1A	small proline rich protein 1A	6698	NM_005987
203145_at	6.39e-05	8.62e-08	6.44753	7.84064	1.03064	SPAG5	sperm associated antigen 5	10615	NM_006461
212858_at	6.53e-05	9.11e-08	6.43103	7.7891	0.960697	PAQR4	progestin and adipoQ receptor family member 4	124222	AL520675
205064_at	6.81e-05	1e-07	6.40226	7.69924	3.80569	SPRR1B	small proline rich protein 1B	6699	NM_003125
202988_s_at	7.18e-05	1.13e-07	6.36601	7.58595	2.88317	RGS1	regulator of G-protein signaling 1	5996	NM_002922
213796_at	8.12e-05	1.39e-07	6.30453	7.39375	4.01147	SPRR1A	small proline rich protein 1A	6698
210413_x_at	8.93e-05	1.61e-07	6.26034	7.2556	3.27769	SERPINB4///SERPINB3	serpin family B member 4///serpin family B member 3	6318///6317	U19557
219394_at	9.96e-05	1.88e-07	6.21285	7.10708	0.770552	PGS1	phosphatidylglycerophosphate synthase 1	9489	NM_024419
216834_at	0.000106	2.05e-07	6.18785	7.0289	2.917	RGS1	regulator of G-protein signaling 1	5996	S59049
202345_s_at	0.000113	2.25e-07	6.16014	6.94225	2.14147	FABP5	fatty acid binding protein 5	2171	NM_001444
210052_s_at	0.000114	2.42e-07	6.13784	6.87249	0.998641	TPX2	TPX2, microtubule nucleation factor	22974	AF098158
203691_at	0.000123	2.71e-07	6.10353	6.7652	4.04022	PI3	peptidase inhibitor 3	5266	NM_002638
209720_s_at	0.000126	2.85e-07	6.08831	6.71761	3.9541	SERPINB3	serpin family B member 3	6317	BC005224
213671_s_at	0.000126	2.98e-07	6.07469	6.67503	0.807411	MIR6758///MARS	microRNA 6758///methionyl-tRNA synthetase	102465454///4141
209125_at	0.000126	3e-07	6.07336	6.67086	1.92712	KRT6A	keratin 6A	3853	V01516
214599_at	0.000129	3.19e-07	6.0547	6.61252	2.75557	IVL	involucrin	3713	NM_005547
201123_s_at	0.000131	3.48e-07	6.02848	6.53053	1.90489	EIF5A	eukaryotic translation initiation factor 5A	1984	NM_001970
202570_s_at	0.000156	4.56e-07	5.94726	6.27661	0.611829	DLGAP4	DLG associated protein 4	22839	BF346592
206561_s_at	0.000159	4.81e-07	5.93164	6.22782	2.02854	AKR1B10	aldo-keto reductase family 1 member B10	57016	NM_020299
211906_s_at	0.000159	5.08e-07	5.91469	6.17484	3.4844	SERPINB4	serpin family B member 4	6318	AB046400
203535_at	0.000164	5.31e-07	5.90166	6.13413	3.28865	S100A9	S100 calcium binding protein A9	6280	NM_002965
212788_x_at	0.000165	5.48e-07	5.8921	6.10426	0.723574	FTL	ferritin light chain	2512	BG537190
209719_x_at	0.000174	6.02e-07	5.86378	6.01581	2.85938	SERPINB3	serpin family B member 3	6317	U19556
209848_s_at	0.000189	6.62e-07	5.83521	5.92656	1.03926	PMEL	premelanosome protein	6490	U01874
203695_s_at	0.000197	7.01e-07	5.81823	5.87357	1.0611	DFNA5	DFNA5, deafness associated tumor suppressor	1687	NM_004403
203234_at	0.000214	7.89e-07	5.78262	5.76241	1.64038	UPP1	uridine phosphorylase 1	7378	NM_003364
200838_at	0.000306	1.27e-06	5.63992	5.31751	1.2323	CTSB	cathepsin B	1508	NM_001908
214430_at	0.000323	1.38e-06	5.61339	5.23489	0.51212	GLA	galactosidase alpha	2717	NM_000169
213638_at	0.000368	1.71e-06	5.54966	5.03662	1.66789	PHACTR1	phosphatase and actin regulator 1	221692
201584_s_at	0.000382	1.84e-06	5.5274	4.96743	0.725008	DDX39A	DEAD-box helicase 39A	10212	NM_005804
38069_at	0.000382	1.88e-06	5.5208	4.94691	0.762195	CLCN7	chloride voltage-gated channel 7	1186	Z67743
211762_s_at	0.000386	1.95e-06	5.51002	4.91343	1.10635	KPNA2	karyopherin subunit alpha 2	3838	BC005978
218308_at	0.000454	2.37e-06	5.45065	4.72911	1.17091	TACC3	transforming acidic coiled-coil containing protein 3	10460	NM_006342
218741_at	0.00051	2.82e-06	5.39749	4.56431	1.49997	CENPM	centromere protein M	79019	NM_024053
206373_at	0.00051	2.85e-06	5.3952	4.55722	2.14487	ZIC1	Zic family member 1	7545	NM_003412
41469_at	0.00051	2.85e-06	5.39485	4.55612	2.95136	PI3	peptidase inhibitor 3	5266	L10343
202779_s_at	0.000517	2.92e-06	5.38758	4.5336	1.06721	UBE2S	ubiquitin conjugating enzyme E2 S	27338	NM_014501
204092_s_at	0.00054	3.16e-06	5.3633	4.45843	1.21826	AURKA	aurora kinase A	6790	NM_003600
205115_s_at	0.000544	3.21e-06	5.35862	4.44394	0.68809	RBM19	RNA binding motif protein 19	9904	NM_016196
201516_at	0.000569	3.41e-06	5.34061	4.38821	0.767136	SRM	spermidine synthase	6723	NM_003132
202917_s_at	0.000586	3.61e-06	5.32277	4.33304	2.77332	S100A8	S100 calcium binding protein A8	6279	NM_002964
219952_s_at	0.000626	4.04e-06	5.28912	4.22905	0.912369	MCOLN1	mucolipin 1	57192	NM_020533
214580_x_at	0.000626	4.23e-06	5.27505	4.18561	2.16626	KRT6C///KRT6B///KRT6A	keratin 6C///keratin 6B///keratin 6A	286887///3854///3853	AL569511
203201_at	0.000687	4.83e-06	5.23484	4.06155	0.883444	PMM2	phosphomannomutase 2	5373	NM_000303
209166_s_at	0.000747	5.48e-06	5.19585	3.94141	0.722439	MAN2B1	mannosidase alpha class 2B member 1	4125	U68567
202828_s_at	0.000765	5.65e-06	5.18677	3.91344	0.751704	MMP14	matrix metallopeptidase 14	4323	NM_004995
208689_s_at	0.00078	5.88e-06	5.17445	3.87553	0.65003	RPN2	ribophorin II	6185	BC003560
218670_at	0.00078	5.94e-06	5.17158	3.8667	0.761584	PUS1	pseudouridylate synthase 1	80324	NM_025215
213187_x_at	0.000853	6.7e-06	5.1346	3.75303	0.593773	FTL	ferritin light chain	2512	BG538564
200831_s_at	0.000853	6.71e-06	5.13412	3.75154	0.875193	SCD	stearoyl-CoA desaturase	6319	AA678241
204126_s_at	0.000853	6.72e-06	5.13402	3.75122	0.782842	CDC45	cell division cycle 45	8318	NM_003504
200839_s_at	0.000857	6.79e-06	5.13073	3.74112	0.875591	CTSB	cathepsin B	1508	NM_001908
219402_s_at	0.000876	6.98e-06	5.12243	3.71564	0.933056	DERL1	derlin 1	79139	NM_024295
203454_s_at	0.000895	7.21e-06	5.11233	3.6846	1.00754	ATOX1	antioxidant 1 copper chaperone	475	NM_004045
202953_at	0.000903	7.36e-06	5.10609	3.66545	2.3682	C1QB	complement C1q B chain	713	NM_000491
207595_s_at	0.000919	7.53e-06	5.09928	3.64458	0.796175	BMP1	bone morphogenetic protein 1	649
221962_s_at	0.000925	7.7e-06	5.09211	3.62258	1.02466	UBE2H	ubiquitin conjugating enzyme E2 H	7328
211966_at	0.000942	7.92e-06	5.08384	3.59721	1.0774	COL4A2	collagen type IV alpha 2 chain	1284
208693_s_at	0.000982	8.48e-06	5.06267	3.53231	0.617403	GARS	glycyl-tRNA synthetase	2617	D30658
207253_s_at	0.000998	8.76e-06	5.05297	3.50262	0.677582	UBN1	ubinuclein 1	29855
218302_at	0.00101	8.96e-06	5.04587	3.48087	0.833402	PSENEN	presenilin enhancer gamma-secretase subunit	55851
218121_at	0.00102	9.13e-06	5.04021	3.46356	0.487247	HMOX2	heme oxygenase 2	3163	NM_002134
219366_at	0.00106	9.68e-06	5.0221	3.40812	0.743984	AVEN	apoptosis and caspase activation inhibitor	57099	NM_020371
204825_at	0.00107	9.85e-06	5.01686	3.39211	0.802953	MELK	maternal embryonic leucine zipper kinase	9833	NM_014791
203827_at	0.00107	9.87e-06	5.01625	3.39025	1.22746	WIPI1	WD repeat domain, phosphoinositide interacting 1	55062	NM_017983
210075_at	0.0011	1.02e-05	5.00563	3.35777	0.825967	2019-03-02	membrane associated ring-CH-type finger 2	51257	AF151074
213491_x_at	0.0011	1.04e-05	4.99885	3.33706	0.633963	RPN2	ribophorin II	6185	AL514285
202954_at	0.00113	1.1e-05	4.98207	3.28581	0.681165	UBE2C	ubiquitin conjugating enzyme E2 C	11065	NM_007019
219918_s_at	0.00115	1.13e-05	4.97528	3.26509	1.36304	ASPM	abnormal spindle microtubule assembly	259266	NM_018136
203127_s_at	0.00115	1.13e-05	4.9738	3.26057	0.525296	SPTLC2	serine palmitoyltransferase long chain base subunit 2	9517	BC005123
208965_s_at	0.00117	1.16e-05	4.96602	3.23682	1.02121	IFI16	interferon gamma inducible protein 16	3428	BG256677
201645_at	0.00118	1.18e-05	4.96094	3.22134	1.69743	TNC	tenascin C	3371	NM_002160
203367_at	0.00121	1.24e-05	4.94601	3.1758	0.779916	DUSP14	dual specificity phosphatase 14	11072	NM_007026
208433_s_at	0.00121	1.25e-05	4.94385	3.16922	1.08755	LRP8	LDL receptor related protein 8	7804	NM_017522
202185_at	0.00122	1.27e-05	4.93925	3.1552	0.968513	PLOD3	procollagen-lysine,2-oxoglutarate 5-dioxygenase 3	8985	NM_001084
203755_at	0.00124	1.3e-05	4.93097	3.12999	0.976267	BUB1B	BUB1 mitotic checkpoint serine/threonine kinase B	701	NM_001211
213869_x_at	0.00124	1.3e-05	4.93087	3.12968	1.07496	THY1	Thy-1 cell surface antigen	7070	AA218868
221832_s_at	0.00127	1.37e-05	4.91615	3.08487	1.29233	LUZP1	leucine zipper protein 1	7798	AV741657
209017_s_at	0.00127	1.38e-05	4.91426	3.0791	0.526611	LONP1	lon peptidase 1, mitochondrial	9361	U02389
221601_s_at	0.00128	1.4e-05	4.90785	3.0596	1.33129	FCMR	Fc fragment of IgM receptor	9214	AI084226
208002_s_at	0.00133	1.47e-05	4.89457	3.01921	1.06268	ACOT7	acyl-CoA thioesterase 7	11332	NM_007274
222155_s_at	0.00137	1.51e-05	4.88516	2.99061	1.11245	SLC52A2	solute carrier family 52 member 2	79581	AK021918
208539_x_at	0.00141	1.57e-05	4.8736	2.9555	2.77596	SPRR2B	small proline rich protein 2B	6701	NM_006945
213836_s_at	0.00142	1.6e-05	4.86786	2.93804	1.20272	WIPI1	WD repeat domain, phosphoinositide interacting 1	55062	AW052084
202574_s_at	0.00142	1.61e-05	4.86583	2.93188	0.695264	CSNK1G2	casein kinase 1 gamma 2	1455	NM_001319
209800_at	0.00142	1.61e-05	4.86562	2.93125	2.55458	KRT16	keratin 16	3868	AF061812
203167_at	0.00142	1.62e-05	4.86477	2.92867	1.2305	TIMP2	TIMP metallopeptidase inhibitor 2	7077	NM_003255
200801_x_at	0.00142	1.62e-05	4.86369	2.9254	0.548872	ACTB	actin beta	60	NM_001101
209589_s_at	0.00145	1.68e-05	4.85302	2.89301	0.741688	EPHB2	EPH receptor B2	2048	AF025304
200824_at	0.00147	1.72e-05	4.84471	2.86781	0.698006	GSTP1	glutathione S-transferase pi 1	2950	NM_000852
211725_s_at	0.00147	1.73e-05	4.84369	2.8647	0.673721	BID	BH3 interacting domain death agonist	637	BC005884
203878_s_at	0.00147	1.73e-05	4.84277	2.86193	1.19897	MMP11	matrix metallopeptidase 11	4320	NM_005940
202613_at	0.00147	1.75e-05	4.84069	2.85562	0.820637	CTPS1	CTP synthase 1	1503	NM_001905
214370_at	0.00147	1.76e-05	4.83892	2.85025	3.3366	S100A8	S100 calcium binding protein A8	6279
218296_x_at	0.00147	1.77e-05	4.83655	2.84305	0.611047	MSTO2P///MSTO1	misato family member 2, pseudogene///misato 1, mitochondrial distribution and morphology regulator	100129405///55154	NM_018116
201819_at	0.00148	1.79e-05	4.83228	2.8301	1.00494	SCARB1	scavenger receptor class B member 1	949	NM_005505
218474_s_at	0.00149	1.82e-05	4.82815	2.81762	0.580547	KCTD5	potassium channel tetramerization domain containing 5	54442	NM_018992
201954_at	0.00151	1.85e-05	4.82289	2.80167	0.630894	ARPC1B	actin related protein 2/3 complex subunit 1B	10095	NM_005720
202329_at	0.00152	1.89e-05	4.81704	2.78394	0.663542	CSK	c-src tyrosine kinase	1445	NM_004383
204910_s_at	0.00152	1.89e-05	4.81657	2.78253	1.12211	TRIM3	tripartite motif containing 3	10612
202856_s_at	0.00152	1.89e-05	4.81585	2.78034	1.20073	MIR6787///SLC16A3	microRNA 6787///solute carrier family 16 member 3	102465472///9123	NM_004207
209336_at	0.00152	1.9e-05	4.81454	2.77636	0.529835	PWP2	PWP2 periodic tryptophan protein homolog (yeast)	5822	U56085
219978_s_at	0.00152	1.92e-05	4.81196	2.76856	1.01369	NUSAP1	nucleolar and spindle associated protein 1	51203	NM_018454
200766_at	0.00152	1.93e-05	4.8097	2.76173	0.858638	CTSD	cathepsin D	1509	NM_001909
205546_s_at	0.00152	1.94e-05	4.80825	2.75732	0.541811	TYK2	tyrosine kinase 2	7297	NM_003331
201920_at	0.00152	1.94e-05	4.80775	2.75583	0.940019	SLC20A1	solute carrier family 20 member 1	6574	NM_005415
203276_at	0.00152	1.96e-05	4.8052	2.74811	0.702871	LMNB1	lamin B1	4001	NM_005573
208966_x_at	0.00153	1.97e-05	4.8027	2.74055	0.85042	IFI16	interferon gamma inducible protein 16	3428	AF208043
204244_s_at	0.00155	2.03e-05	4.79407	2.71441	0.94402	DBF4	DBF4 zinc finger	10926	NM_006716
200846_s_at	0.00156	2.06e-05	4.78965	2.70106	0.705828	PPP1CA	protein phosphatase 1 catalytic subunit alpha	5499	NM_002708
200629_at	0.00159	2.1e-05	4.7836	2.68277	1.47429	WARS	tryptophanyl-tRNA synthetase	7453	NM_004184
219117_s_at	0.00159	2.12e-05	4.7807	2.674	1.49585	FKBP11	FK506 binding protein 11	51303	NM_016594
204998_s_at	0.00168	2.27e-05	4.75916	2.60893	0.68909	ATF5	activating transcription factor 5	22809	NM_012068
201422_at	0.00168	2.28e-05	4.75843	2.60672	1.4907	IFI30///PIK3R2	IFI30, lysosomal thiol reductase///phosphoinositide-3-kinase regulatory subunit 2	10437///5296	NM_006332
208851_s_at	0.00174	2.37e-05	4.7465	2.57074	1.07281	THY1	Thy-1 cell surface antigen	7070	AL161958
201281_at	0.00175	2.4e-05	4.74238	2.5583	0.734807	ADRM1	adhesion regulating molecule 1	11047	NM_007002
201853_s_at	0.0018	2.52e-05	4.72758	2.51368	0.696349	CDC25B	cell division cycle 25B	994	NM_021873
213457_at	0.0018	2.53e-05	4.72619	2.50951	0.861212	MFHAS1	malignant fibrous histiocytoma amplified sequence 1	9258
202134_s_at	0.00203	2.92e-05	4.68132	2.37448	0.597836	WWTR1	WW domain containing transcription regulator 1	25937	NM_015472
203764_at	0.00209	3.02e-05	4.67054	2.3421	0.788134	DLGAP5	DLG associated protein 5	9787	NM_014750
221269_s_at	0.0021	3.04e-05	4.66846	2.33587	0.734644	SH3BGRL3	SH3 domain binding glutamate rich protein like 3	83442	NM_031286
203507_at	0.0021	3.06e-05	4.66684	2.331	1.21262	LOC101928634///SNORA67///CD68	uncharacterized LOC101928634///small nucleolar RNA, H/ACA box 67///CD68 molecule	101928634///26781///968	NM_001251
205436_s_at	0.00212	3.11e-05	4.66131	2.3144	0.94416	H2AFX	H2A histone family member X	3014	NM_002105
200678_x_at	0.00219	3.25e-05	4.64813	2.27484	0.633148	GRN	granulin	2896	NM_002087
201195_s_at	0.00221	3.29e-05	4.64447	2.2639	1.1447	SLC7A5	solute carrier family 7 member 5	8140	AB018009
219637_at	0.00221	3.29e-05	4.64387	2.26209	1.14184	ARMC9	armadillo repeat containing 9	80210	NM_025139
209924_at	0.00221	3.3e-05	4.64292	2.25924	2.20624	CCL18	C-C motif chemokine ligand 18	6362	AB000221
222067_x_at	0.00224	3.37e-05	4.63708	2.24173	0.921652	HIST1H2BD	histone cluster 1, H2bd	3017
215427_s_at	0.00225	3.41e-05	4.63314	2.22992	1.04313	ZCCHC14	zinc finger CCHC-type containing 14	23174	AL117532
202206_at	0.00228	3.46e-05	4.62829	2.2154	0.784787	ARL4C	ADP ribosylation factor like GTPase 4C	10123	AW450363
207610_s_at	0.00233	3.59e-05	4.61677	2.18091	0.75241	ADGRE2	adhesion G protein-coupled receptor E2	30817	NM_013447
203554_x_at	0.00237	3.72e-05	4.60572	2.14784	0.823354	PTTG1	pituitary tumor-transforming 1	9232	NM_004219
208900_s_at	0.00237	3.75e-05	4.6034	2.14093	0.878877	TOP1	topoisomerase (DNA) I	7150
202860_at	0.00241	3.83e-05	4.59666	2.12078	0.767589	DENND4B	DENN domain containing 4B	9909	NM_014856
206247_at	0.00241	3.84e-05	4.59581	2.11823	1.24313	MICB	MHC class I polypeptide-related sequence B	4277	NM_005931
204962_s_at	0.00241	3.86e-05	4.59455	2.11447	0.774718	SLC35F6///CENPA	solute carrier family 35 member F6///centromere protein A	54978///1058	NM_001809
211284_s_at	0.00247	4.01e-05	4.58254	2.07857	0.692345	GRN	granulin	2896	BC000324
204475_at	0.00247	4.01e-05	4.58202	2.07704	2.73168	MMP1	matrix metallopeptidase 1	4312	NM_002421
206193_s_at	0.00247	4.02e-05	4.58169	2.07606	3.60828	CDSN	corneodesmosin	1041	NM_001264
209025_s_at	0.00248	4.06e-05	4.57842	2.06628	0.834655	SYNCRIP	synaptotagmin binding cytoplasmic RNA interacting protein	10492	AF037448
205479_s_at	0.0025	4.1e-05	4.57507	2.05629	0.985528	PLAU	plasminogen activator, urokinase	5328	NM_002658
208850_s_at	0.00265	4.41e-05	4.5523	1.98837	0.938322	THY1	Thy-1 cell surface antigen	7070	AL558479
214710_s_at	0.00265	4.45e-05	4.54999	1.9815	0.921219	CCNB1	cyclin B1	891	BE407516
205207_at	0.00265	4.45e-05	4.5497	1.98063	0.942587	IL6	interleukin 6	3569	NM_000600
214853_s_at	0.00265	4.46e-05	4.54931	1.97946	0.851019	SHC1	SHC adaptor protein 1	6464	AI091079
210940_s_at	0.00265	4.47e-05	4.54843	1.97686	1.5943	GRM1	glutamate metabotropic receptor 1	2911	U31216
203052_at	0.00265	4.5e-05	4.54645	1.97094	1.55674	C2	complement component 2	717	NM_000063
207828_s_at	0.00265	4.52e-05	4.5447	1.96573	1.09243	CENPF	centromere protein F	1063	NM_016343
210112_at	0.00265	4.57e-05	4.54153	1.95629	1.01617	HPS1	HPS1, biogenesis of lysosomal organelles complex 3 subunit 1	3257	U96721
212129_at	0.00265	4.58e-05	4.54078	1.95407	0.499935	NIPA2	non imprinted in Prader-Willi/Angelman syndrome 2	81614	AI589507
203258_at	0.00278	4.88e-05	4.52061	1.89405	0.838692	DRAP1	DR1 associated protein 1	10589	NM_006442
200021_at	0.00278	4.92e-05	4.51814	1.88671	0.476366	CFL1	cofilin 1	1072	NM_005507
213399_x_at	0.00278	4.97e-05	4.51532	1.87834	0.584346	RPN2	ribophorin II	6185
202787_s_at	0.00278	4.97e-05	4.51486	1.87696	0.646118	MAPKAPK3	mitogen-activated protein kinase-activated protein kinase 3	7867	U43784
204158_s_at	0.00278	4.98e-05	4.51469	1.87645	0.862909	TCIRG1	T-cell immune regulator 1, ATPase H+ transporting V0 subunit a3	10312	NM_006019
221799_at	0.00282	5.07e-05	4.50844	1.85788	0.615786	CHPF2	chondroitin polymerizing factor 2	54480	AB037823
221577_x_at	0.00288	5.24e-05	4.49867	1.82886	2.61809	GDF15	growth differentiation factor 15	9518	AF003934
211047_x_at	0.00288	5.24e-05	4.49846	1.82824	0.548775	AP2S1	adaptor related protein complex 2 sigma 1 subunit	1175	BC006337
218542_at	0.00294	5.39e-05	4.48965	1.80211	1.22585	CEP55	centrosomal protein 55	55165	NM_018131
221644_s_at	0.00296	5.46e-05	4.48564	1.7902	1.20046	SLC45A2	solute carrier family 45 member 2	51151	BC003597
204478_s_at	0.00296	5.48e-05	4.48426	1.7861	0.565551	RABIF	RAB interacting factor	5877	NM_002871
221539_at	0.00297	5.54e-05	4.48062	1.77533	0.832096	EIF4EBP1	eukaryotic translation initiation factor 4E binding protein 1	1978	AB044548
221059_s_at	0.003	5.62e-05	4.4764	1.76281	1.08187	COTL1	coactosin like F-actin binding protein 1	23406	NM_021615
200998_s_at	0.00301	5.67e-05	4.47378	1.75503	0.619951	CKAP4	cytoskeleton associated protein 4	10970
203022_at	0.00302	5.7e-05	4.47208	1.74999	0.521194	RNASEH2A	ribonuclease H2 subunit A	10535	NM_006397
213011_s_at	0.00302	5.72e-05	4.47101	1.74682	0.461794	TPI1	triosephosphate isomerase 1	7167
201088_at	0.00303	5.75e-05	4.46911	1.74119	0.952155	KPNA2	karyopherin subunit alpha 2	3838	NM_002266
203876_s_at	0.00309	5.87e-05	4.46287	1.72272	0.942106	MMP11	matrix metallopeptidase 11	4320
218562_s_at	0.00309	5.88e-05	4.46227	1.72094	0.79746	TMEM57	transmembrane protein 57	55219	NM_018202
205828_at	0.00309	5.96e-05	4.45798	1.70824	1.62422	MMP3	matrix metallopeptidase 3	4314	NM_002422
44654_at	0.00309	5.96e-05	4.4576	1.70711	0.658062	G6PC3	glucose-6-phosphatase catalytic subunit 3	92579
209912_s_at	0.00318	6.18e-05	4.44656	1.67444	0.716724	MIR4656///AP5Z1	microRNA 4656///adaptor related protein complex 5 zeta 1 subunit	100616465///9907
218057_x_at	0.00323	6.28e-05	4.44154	1.6596	0.498764	EMC8	ER membrane protein complex subunit 8	10328	NM_006067
204767_s_at	0.00329	6.41e-05	4.43475	1.63954	0.790815	FEN1	flap structure-specific endonuclease 1	2237	BC000323
201251_at	0.00333	6.53e-05	4.42897	1.62247	0.739336	PKM	pyruvate kinase, muscle	5315	NM_002654
200923_at	0.00333	6.54e-05	4.42864	1.62149	0.782165	LGALS3BP	galectin 3 binding protein	3959	NM_005567
202120_x_at	0.00334	6.59e-05	4.42593	1.61349	0.563359	AP2S1	adaptor related protein complex 2 sigma 1 subunit	1175	NM_004069
213867_x_at	0.00343	6.81e-05	4.41576	1.58346	0.530766	ACTB	actin beta	60
218996_at	0.0035	7e-05	4.40684	1.55715	0.703163	TFPT	TCF3 fusion partner	29844	NM_013342
201252_at	0.0035	7.03e-05	4.40555	1.55335	0.786859	PSMC4	proteasome 26S subunit, ATPase 4	5704	NM_006503
208079_s_at	0.0035	7.04e-05	4.40505	1.5519	0.799161	AURKA	aurora kinase A	6790	NM_003600
218151_x_at	0.0035	7.06e-05	4.40451	1.5503	0.788229	SLC52A2	solute carrier family 52 member 2	79581	NM_024531
207809_s_at	0.00351	7.1e-05	4.40258	1.5446	0.440998	ATP6AP1	ATPase H+ transporting accessory protein 1	537	NM_001183
200734_s_at	0.00363	7.38e-05	4.39019	1.5081	0.638147	ARF3	ADP ribosylation factor 3	377	BG341906
218368_s_at	0.00367	7.55e-05	4.38329	1.48779	0.875686	TNFRSF12A	TNF receptor superfamily member 12A	51330	NM_016639
209825_s_at	0.0037	7.63e-05	4.37982	1.47758	0.644965	MIR3658///UCK2	microRNA 3658///uridine-cytidine kinase 2	100500832///7371	BC002906
205827_at	0.00371	7.66e-05	4.37845	1.47355	0.993404	CCK	cholecystokinin	885	NM_000729
219361_s_at	0.00383	7.98e-05	4.36541	1.43521	0.781842	AEN	apoptosis enhancing nuclease	64782	NM_022767
203665_at	0.00383	8e-05	4.36467	1.43304	0.847844	HMOX1	heme oxygenase 1	3162	NM_002133
203033_x_at	0.00383	8.02e-05	4.36409	1.43132	0.721075	FH	fumarate hydratase	2271	NM_000143
217139_at	0.00383	8.04e-05	4.36306	1.42832	0.494609	VDAC1	voltage dependent anion channel 1	7416	AJ002428
219282_s_at	0.00392	8.36e-05	4.35076	1.39217	0.941415	TRPV2	transient receptor potential cation channel subfamily V member 2	51393	NM_016113
213007_at	0.00395	8.48e-05	4.34641	1.37942	0.569624	FANCI	Fanconi anemia complementation group I	55215	W74442
211091_s_at	0.00404	8.75e-05	4.33644	1.35016	0.754318	NF2	neurofibromin 2	4771	AF122828
204412_s_at	0.00413	9.05e-05	4.32539	1.31778	1.27802	NEFH	neurofilament heavy polypeptide	4744	NM_021076
205114_s_at	0.00418	9.18e-05	4.32117	1.30543	1.26759	CCL3L3///CCL3L1///CCL3	C-C motif chemokine ligand 3 like 3///C-C motif chemokine ligand 3 like 1///C-C motif chemokine ligand 3	414062///6349///6348	NM_002983
219041_s_at	0.00419	9.25e-05	4.3186	1.2979	0.426992	REPIN1	replication initiator 1	29803	NM_014374
200628_s_at	0.00423	9.41e-05	4.31304	1.28165	1.45619	WARS	tryptophanyl-tRNA synthetase	7453	M61715
202628_s_at	0.00423	9.48e-05	4.31062	1.27455	1.2731	SERPINE1	serpin family E member 1	5054	NM_000602
202752_x_at	0.00423	9.49e-05	4.31034	1.27374	0.671784	SLC7A8	solute carrier family 7 member 8	23428	NM_012244
210164_at	0.00448	0.000101	4.2907	1.21632	2.09388	GZMB	granzyme B	3002	J03189
218317_x_at	0.00449	0.000102	4.2884	1.20959	0.728761	SLX1A///SLX1B	SLX1 homolog A, structure-specific endonuclease subunit///SLX1 homolog B, structure-specific endonuclease subunit	548593///79008	NM_024044
210926_at	0.00454	0.000103	4.28445	1.19808	0.697851	POTEKP	POTE ankyrin domain family member K, pseudogene	440915	AY014272
207945_s_at	0.00458	0.000105	4.27912	1.1825	0.594754	CSNK1D	casein kinase 1 delta	1453	NM_001893
215949_x_at	0.00458	0.000105	4.27872	1.18136	1.30544	IGHM	immunoglobulin heavy constant mu	3507
32091_at	0.00458	0.000105	4.27767	1.17829	0.750684	SLC25A44	solute carrier family 25 member 44	9673	AB007915
209372_x_at	0.00464	0.000107	4.27266	1.16368	1.47419	TUBB2B///TUBB2A	tubulin beta 2B class IIb///tubulin beta 2A class IIa	347733///7280	BF971587
200835_s_at	0.00468	0.000109	4.26676	1.14647	1.29242	MAP4	microtubule associated protein 4	4134
214581_x_at	0.00468	0.000109	4.266	1.14427	0.962925	TNFRSF21	TNF receptor superfamily member 21	27242	BE568134
209186_at	0.00468	0.00011	4.26331	1.13642	0.684476	ATP2A2	ATPase sarcoplasmic/endoplasmic reticulum Ca2+ transporting 2	488	M23114
206441_s_at	0.00472	0.000111	4.25989	1.12645	0.458676	COMMD4	COMM domain containing 4	54939	NM_017828
202799_at	0.00475	0.000112	4.2568	1.11745	0.540751	CLPP	caseinolytic mitochondrial matrix peptidase proteolytic subunit	8192	NM_006012
218143_s_at	0.00476	0.000113	4.25556	1.11386	0.464464	SCAMP2	secretory carrier membrane protein 2	10066	NM_005697
201266_at	0.00476	0.000113	4.2549	1.11194	0.713557	TXNRD1	thioredoxin reductase 1	7296	NM_003330
208546_x_at	0.00483	0.000115	4.24928	1.09558	1.36925	HIST1H2BH	histone cluster 1, H2bh	8345	NM_003524
209365_s_at	0.00483	0.000115	4.24879	1.09413	1.18525	ECM1	extracellular matrix protein 1	1893	U65932
200871_s_at	0.00483	0.000116	4.2472	1.0895	0.419228	PSAP	prosaposin	5660	NM_002778
206196_s_at	0.00483	0.000117	4.24419	1.08077	0.930005	RUNDC3A	RUN domain containing 3A	10900	NM_006695
201926_s_at	0.00483	0.000117	4.24348	1.07869	0.780695	CD55	CD55 molecule (Cromer blood group)	1604	BC001288
205057_s_at	0.00484	0.000117	4.24225	1.07511	0.647949	IDUA	iduronidase, alpha-L-	3425
201208_s_at	0.00492	0.00012	4.23681	1.05929	0.577403	TNFAIP1	TNF alpha induced protein 1	7126	BC001643
210589_s_at	0.00494	0.000121	4.2338	1.05055	0.810921	GBAP1	glucosylceramidase beta pseudogene 1	2630	D13287
222199_s_at	0.00494	0.000121	4.23276	1.04753	0.689281	BIN3	bridging integrator 3	55909
202338_at	0.00498	0.000123	4.22791	1.03343	0.687633	TK1	thymidine kinase 1	7083	NM_003258
206907_at	0.005	0.000124	4.22582	1.02738	0.598059	TNFSF9	tumor necrosis factor superfamily member 9	8744	NM_003811
219099_at	0.00506	0.000126	4.2192	1.00814	0.745511	TIGAR	TP53 induced glycolysis regulatory phosphatase	57103	NM_020375
200660_at	0.0051	0.000128	4.21486	0.995555	0.759491	S100A11	S100 calcium binding protein A11	6282	NM_005620
210652_s_at	0.0051	0.000128	4.21444	0.994347	1.18193	TTC39A	tetratricopeptide repeat domain 39A	22996	BC004399
211730_s_at	0.00511	0.000129	4.21266	0.989163	0.580704	POLR2L	RNA polymerase II subunit L	5441	BC005903
215137_at	0.00516	0.00013	4.20891	0.978288	0.625989
213696_s_at	0.00518	0.000132	4.20588	0.969509	0.767558	MED8	mediator complex subunit 8	112950	AA421957
41037_at	0.00523	0.000133	4.20233	0.959218	0.676328	TEAD4	TEA domain transcription factor 4	7004	U63824
216041_x_at	0.00529	0.000135	4.19728	0.944601	0.609302	GRN	granulin	2896
219634_at	0.00531	0.000136	4.19512	0.938348	0.878756	CHST11	carbohydrate (chondroitin 4) sulfotransferase 11	50515	NM_018413
32128_at	0.00536	0.000138	4.19024	0.924199	1.76049	CCL18	C-C motif chemokine ligand 18	6362	Y13710
212683_at	0.00536	0.000138	4.18988	0.923161	0.56112	SLC25A44	solute carrier family 25 member 44	9673	AL526243
58308_at	0.00538	0.000139	4.18802	0.917784	0.611072	TRIM62	tripartite motif containing 62	55223	R71157
204043_at	0.00549	0.000142	4.18047	0.895937	0.812183	TCN2	transcobalamin 2	6948	NM_000355
201212_at	0.00553	0.000144	4.17709	0.886181	1.12425	LGMN	legumain	5641	D55696
200622_x_at	0.00559	0.000146	4.17159	0.870254	0.597045	CALM3///CALM2///CALM1	calmodulin 3///calmodulin 2///calmodulin 1	808///805///801	AV685208
217878_s_at	0.0057	0.00015	4.16291	0.845206	0.567482	CDC27	cell division cycle 27	996
204169_at	0.00578	0.000153	4.15804	0.831136	0.680293	IMPDH1	inosine monophosphate dehydrogenase 1	3614	NM_000883
210448_s_at	0.00579	0.000154	4.15638	0.826357	0.704549	P2RX5	purinergic receptor P2X 5	5026	U49396
209875_s_at	0.00579	0.000154	4.15585	0.824816	2.65957	SPP1	secreted phosphoprotein 1	6696	M83248
208511_at	0.00579	0.000154	4.1556	0.824094	1.00983	PTTG3P	pituitary tumor-transforming 3, pseudogene	26255
213680_at	0.00582	0.000155	4.15264	0.815562	1.67234	KRT6B	keratin 6B	3854
202382_s_at	0.00585	0.000157	4.14966	0.806973	0.503733	GNPDA1	glucosamine-6-phosphate deaminase 1	10007	NM_005471
203679_at	0.00585	0.000157	4.14882	0.804554	0.79723	TMED1	transmembrane p24 trafficking protein 1	11018	NM_006858
213571_s_at	0.00585	0.000158	4.14811	0.802487	0.626713	EIF4E2	eukaryotic translation initiation factor 4E family member 2	9470	BF516289
215498_s_at	0.00587	0.000159	4.14575	0.79568	0.801123	LOC100996792///MAP2K3	dual specificity mitogen-activated protein kinase kinase 3///mitogen-activated protein kinase kinase 3	100996792///5606	AA780381
205157_s_at	0.00596	0.000161	4.1401	0.779399	1.46114	KRT17///JUP	keratin 17///junction plakoglobin	3872///3728	NM_000422
204857_at	0.00605	0.000164	4.13471	0.763888	0.978299	MAD1L1	MAD1 mitotic arrest deficient like 1	8379	NM_003550
221602_s_at	0.00606	0.000165	4.13297	0.758867	1.58708	FCMR	Fc fragment of IgM receptor	9214	AF057557
203821_at	0.00606	0.000165	4.13224	0.756787	1.06395	HBEGF	heparin binding EGF like growth factor	1839	NM_001945
204033_at	0.00608	0.000166	4.13081	0.752659	0.447195	TRIP13	thyroid hormone receptor interactor 13	9319	NM_004237
211787_s_at	0.00611	0.000167	4.12895	0.747294	0.405528	LOC101928634///SENP3-EIF4A1///SNORD10///SNORA48///SNORA67///EIF4A1	uncharacterized LOC101928634///SENP3-EIF4A1 readthrough (NMD candidate)///small nucleolar RNA, C/D box 10///small nucleolar RNA, H/ACA box 48///small nucleolar RNA, H/ACA box 67///eukaryotic translation initiation factor 4A1	101928634///100533955///652966///652965///26781///1973	BC006210
201587_s_at	0.00612	0.000168	4.12778	0.743945	0.655695	IRAK1	interleukin 1 receptor associated kinase 1	3654	NM_001569
203028_s_at	0.00615	0.000169	4.12587	0.738427	0.856678	CYBA	cytochrome b-245 alpha chain	1535	NM_000101
200709_at	0.00626	0.000173	4.11753	0.714464	0.461807	LOC101929368///FKBP1A	uncharacterized LOC101929368///FK506 binding protein 1A	101929368///2280	NM_000801
219082_at	0.00643	0.00018	4.10584	0.680863	0.780496	CEMP1///AMDHD2	cementum protein 1///amidohydrolase domain containing 2	752014///51005	NM_015944
211052_s_at	0.00644	0.00018	4.10456	0.677201	0.598723	TBCD	tubulin folding cofactor D	6904	BC006364
214448_x_at	0.00644	0.000181	4.10404	0.675707	0.562784	NFKBIB	NFKB inhibitor beta	4793	NM_002503
206332_s_at	0.00649	0.000183	4.09902	0.661285	0.762676	IFI16	interferon gamma inducible protein 16	3428	NM_005531
221050_s_at	0.00654	0.000186	4.09478	0.649147	0.597348	GTPBP2	GTP binding protein 2	54676	NM_019096
202807_s_at	0.00666	0.000191	4.08571	0.623142	0.605943	TOM1	target of myb1 membrane trafficking protein	10043	NM_005488
203072_at	0.00667	0.000192	4.08429	0.619055	0.609225	MYO1E	myosin IE	4643	NM_004998
203560_at	0.00681	0.000198	4.07468	0.591528	0.951755	GGH	gamma-glutamyl hydrolase	8836	NM_003878
218291_at	0.00681	0.000198	4.0741	0.589889	0.712429	LAMTOR2	late endosomal/lysosomal adaptor, MAPK and MTOR activator 2	28956	NM_014017
202499_s_at	0.00688	0.000201	4.06977	0.577496	0.969716	SLC2A3	solute carrier family 2 member 3	6515	NM_006931
209803_s_at	0.00696	0.000204	4.06465	0.562852	1.35819	PHLDA2	pleckstrin homology like domain family A member 2	7262	AF001294
201460_at	0.00698	0.000205	4.06278	0.557505	0.583973	MAPKAPK2	mitogen-activated protein kinase-activated protein kinase 2	9261	AI141802
201377_at	0.00698	0.000205	4.06241	0.556444	0.805547	UBAP2L	ubiquitin associated protein 2 like	9898	NM_014847
222361_at	0.00729	0.000218	4.04306	0.501181	0.482856	TUBBP5	tubulin beta pseudogene 5	643224
218260_at	0.00729	0.000218	4.04304	0.501124	0.551254	DDA1	DET1 and DDB1 associated 1	79016	NM_024050
201390_s_at	0.00737	0.000222	4.03757	0.485526	0.439423	CSNK2B	casein kinase 2 beta	1460	NM_001320
204641_at	0.0074	0.000223	4.03502	0.47825	0.865823	NEK2	NIMA related kinase 2	4751	NM_002497
203699_s_at	0.00741	0.000224	4.03423	0.47598	1.04209	DIO2	deiodinase, iodothyronine, type II	1734	U53506
202075_s_at	0.00756	0.000229	4.02691	0.455149	0.58843	PLTP	phospholipid transfer protein	5360	NM_006227
201755_at	0.00769	0.000234	4.01937	0.433663	0.549028	MCM5	minichromosome maintenance complex component 5	4174	NM_006739
204966_at	0.00771	0.000236	4.01705	0.427067	0.803458	ADGRB2	adhesion G protein-coupled receptor B2	576
202659_at	0.00771	0.000236	4.0165	0.425491	0.764581	PSMB10	proteasome subunit beta 10	5699	NM_002801
218009_s_at	0.00788	0.000243	4.0076	0.400201	0.880738	PRC1	protein regulator of cytokinesis 1	9055	NM_003981
218726_at	0.00801	0.000249	3.99978	0.377962	1.07159	HJURP	Holliday junction recognition protein	55355	NM_018410
36994_at	0.00801	0.000249	3.99975	0.377889	0.452878	ATP6V0C	ATPase H+ transporting V0 subunit c	527	M62762
203693_s_at	0.00815	0.000254	3.99318	0.35923	1.04584	E2F3	E2F transcription factor 3	1871	NM_001949
217529_at	0.00838	0.000264	3.98044	0.323089	0.500406	ORAI2	ORAI calcium release-activated calcium modulator 2	80228	BE547674
216548_x_at	0.00844	0.000266	3.97747	0.314676	0.562777	HMGB3P1	high mobility group box 3 pseudogene 1	128872
200832_s_at	0.00846	0.000267	3.97622	0.311151	0.869892	SCD	stearoyl-CoA desaturase	6319	AB032261
213790_at	0.00849	0.000269	3.97413	0.305208	0.951231	ADAM12	ADAM metallopeptidase domain 12	8038	W46291
218585_s_at	0.00849	0.00027	3.97358	0.303656	0.862579	DTL	denticleless E3 ubiquitin protein ligase homolog	51514	NM_016448
205334_at	0.00852	0.000271	3.97218	0.299681	1.9361	S100A1	S100 calcium binding protein A1	6271	NM_006271
208934_s_at	0.00852	0.000271	3.97133	0.297275	0.51368	LGALS8	galectin 8	3964	AF342815
210845_s_at	0.00862	0.000276	3.96582	0.28169	0.743557	PLAUR	plasminogen activator, urokinase receptor	5329	U08839
218828_at	0.00867	0.000278	3.96346	0.275	0.460026	TMEM256-PLSCR3///PLSCR3	TMEM256-PLSCR3 readthrough (NMD candidate)///phospholipid scramblase 3	100529211///57048	NM_020360
204252_at	0.00868	0.000279	3.96249	0.272279	0.927933	CDK2	cyclin dependent kinase 2	1017	M68520
219372_at	0.0087	0.000281	3.95987	0.264865	1.04544	IFT81	intraflagellar transport 81	28981	NM_014055
210785_s_at	0.00876	0.000284	3.95645	0.255194	0.794053	THEMIS2	thymocyte selection associated family member 2	9473	AB035482
200966_x_at	0.00885	0.000288	3.95179	0.242017	0.530851	ALDOA	aldolase, fructose-bisphosphate A	226	NM_000034
217272_s_at	0.00885	0.000288	3.95161	0.241514	1.29331	SERPINB13	serpin family B member 13	5275	AJ001698
205502_at	0.00885	0.000289	3.95131	0.240676	0.847214	CYP17A1	cytochrome P450 family 17 subfamily A member 1	1586	NM_000102
208612_at	0.00887	0.00029	3.94927	0.234898	0.61657	PDIA3	protein disulfide isomerase family A member 3	2923	D83485
218660_at	0.00887	0.000291	3.94905	0.234275	0.66277	DYSF	dysferlin	8291	NM_003494
203968_s_at	0.0089	0.000292	3.9469	0.228203	0.662785	CDC6	cell division cycle 6	990	NM_001254
218039_at	0.00896	0.000295	3.94417	0.220504	0.826763	NUSAP1	nucleolar and spindle associated protein 1	51203	NM_016359
208710_s_at	0.009	0.000297	3.9414	0.212676	0.843206	AP3D1	adaptor related protein complex 3 delta 1 subunit	8943
218130_at	0.00915	0.000303	3.93477	0.193965	0.575151	C17orf62	chromosome 17 open reading frame 62	79415
218803_at	0.00916	0.000305	3.93346	0.190299	0.434594	CHFR	checkpoint with forkhead and ring finger domains, E3 ubiquitin protein ligase	55743	NM_018223
218131_s_at	0.00916	0.000305	3.93312	0.189339	0.42165	GATAD2A	GATA zinc finger domain containing 2A	54815	NM_017660
201201_at	0.00935	0.000313	3.92472	0.165659	0.658768	CSTB	cystatin B	1476	NM_000100
208168_s_at	0.00938	0.000316	3.92157	0.156796	1.97667	CHIT1	chitinase 1	1118	NM_003465
214687_x_at	0.0095	0.00032	3.91686	0.143528	0.531634	ALDOA	aldolase, fructose-bisphosphate A	226
215495_s_at	0.0098	0.000333	3.90374	0.106619	0.925539	SAMD4A	sterile alpha motif domain containing 4A	23034	AL117523
201792_at	0.00982	0.000335	3.90246	0.103042	0.882111	AEBP1	AE binding protein 1	165	NM_001129
209196_at	0.00983	0.000337	3.9006	0.097809	0.767373	WDR46	WD repeat domain 46	9277	BC000388
222037_at	0.0101	0.000352	3.88569	0.055956	0.586654	MCM4	minichromosome maintenance complex component 4	4173
200999_s_at	0.0103	0.000361	3.87751	0.033026	0.529935	CKAP4	cytoskeleton associated protein 4	10970	NM_006825
202879_s_at	0.0103	0.000361	3.87722	0.032204	0.756844	CYTH1	cytohesin 1	9267
206055_s_at	0.0104	0.000365	3.87353	0.021873	0.623184	SNRPA1	small nuclear ribonucleoprotein polypeptide A'	6627	NM_003090
216847_at	0.0104	0.000366	3.87314	0.020783	0.510797				AB051447
217754_at	0.0104	0.00037	3.8693	0.010028	0.381459	DDX56	DEAD-box helicase 56	54606	NM_019082
208074_s_at	0.0105	0.000372	3.86722	0.004216	0.510418	AP2S1	adaptor related protein complex 2 sigma 1 subunit	1175	NM_021575
206861_s_at	0.0105	0.000373	3.86706	0.00376	0.371345	CGGBP1	CGG triplet repeat binding protein 1	8545	NM_003663
221291_at	0.0105	0.000374	3.86558	-0.000356	0.990175	ULBP2	UL16 binding protein 2	80328	NM_025217
212481_s_at	0.0106	0.000377	3.8632	-0.007036	0.807466	TPM4	tropomyosin 4	7171
221653_x_at	0.0106	0.000379	3.86177	-0.011028	0.922286	APOL2	apolipoprotein L2	23780	BC004395
201668_x_at	0.0108	0.000385	3.85591	-0.0274	1.00033	MARCKS	myristoylated alanine rich protein kinase C substrate	4082
217992_s_at	0.0108	0.000389	3.85263	-0.036571	0.680191	EFHD2	EF-hand domain family member D2	79180	NM_024329
204668_at	0.0109	0.000392	3.84991	-0.044157	0.662721	RNF24	ring finger protein 24	11237
218484_at	0.011	0.000401	3.8429	-0.06374	1.21535	NDUFA4L2	NDUFA4, mitochondrial complex associated like 2	56901	NM_020142
200598_s_at	0.011	0.000401	3.84262	-0.064511	0.513831	MIR3652///HSP90B1	microRNA 3652///heat shock protein 90 beta family member 1	100500842///7184
209238_at	0.0112	0.000407	3.83802	-0.077342	0.552306	STX3	syntaxin 3	6809	BE966922
202487_s_at	0.0112	0.000411	3.83453	-0.087089	0.527691	H2AFV	H2A histone family member V	94239	NM_012412
218608_at	0.0113	0.000416	3.83059	-0.098054	0.923528	ATP13A2	ATPase 13A2	23400	NM_022089
221190_s_at	0.0115	0.000423	3.82541	-0.112493	0.43056	C18orf8	chromosome 18 open reading frame 8	29919	NM_013326
200787_s_at	0.0115	0.000423	3.82537	-0.112587	0.664884	PEA15	phosphoprotein enriched in astrocytes 15	8682	BC002426
202934_at	0.0115	0.000423	3.8249	-0.113914	1.08198	HK2	hexokinase 2	3099	AI761561
204205_at	0.0117	0.000435	3.81578	-0.13928	1.46343	APOBEC3G	apolipoprotein B mRNA editing enzyme catalytic subunit 3G	60489	NM_021822
216318_at	0.0117	0.000437	3.81405	-0.144106	0.805224	IGHA2///IGHA1///IGH	immunoglobulin heavy constant alpha 2 (A2m marker)///immunoglobulin heavy constant alpha 1///immunoglobulin heavy locus	3494///3493///3492	S55735
200065_s_at	0.0117	0.000439	3.81283	-0.147493	0.357254	MIR3620///ARF1	microRNA 3620///ADP ribosylation factor 1	100500810///375	AF052179
218663_at	0.0117	0.00044	3.81224	-0.149128	1.04417	NCAPG	non-SMC condensin I complex subunit G	64151	NM_022346
204433_s_at	0.0117	0.000441	3.81124	-0.151894	0.931067	SPATA2	spermatogenesis associated 2	9825	U28164
208815_x_at	0.0118	0.000447	3.80665	-0.164655	0.828245	HSPA4	heat shock protein family A (Hsp70) member 4	3308	AB023420
209345_s_at	0.0118	0.000447	3.80651	-0.16505	0.469726	PI4K2A	phosphatidylinositol 4-kinase type 2 alpha	55361	AL561930
218860_at	0.0118	0.000448	3.80582	-0.166958	0.608409	NOC4L	nucleolar complex associated 4 homolog	79050	NM_024078
215904_at	0.0118	0.000449	3.80561	-0.167541	0.739243	AFDN	afadin, adherens junction formation factor	4301
222088_s_at	0.0121	0.000463	3.79508	-0.196773	0.59958	SLC2A14///SLC2A3	solute carrier family 2 member 14///solute carrier family 2 member 3	144195///6515
214747_at	0.0122	0.000469	3.79097	-0.208172	0.753242	ZBED4	zinc finger BED-type containing 4	9889	AK022892
201797_s_at	0.0123	0.000474	3.78732	-0.21829	0.532492	VARS	valyl-tRNA synthetase	7407	NM_006295
218567_x_at	0.0123	0.000475	3.78666	-0.220126	0.457618	DPP3	dipeptidyl peptidase 3	10072	NM_005700
212769_at	0.0124	0.000478	3.78458	-0.225867	0.629184	TLE3	transducin like enhancer of split 3	7090
219403_s_at	0.0125	0.000483	3.78071	-0.23659	1.00137	HPSE	heparanase	10855	NM_006665
209736_at	0.0127	0.000495	3.77245	-0.259456	0.92279	SOX13	SRY-box 13	9580	AF116571
219677_at	0.0128	0.000498	3.77064	-0.26446	0.563886	SPSB1	splA/ryanodine receptor domain and SOCS box containing 1	80176	NM_025106
207922_s_at	0.0128	0.000501	3.76904	-0.268893	0.415469	MAEA	macrophage erythroblast attacher	10296	NM_005882
213338_at	0.0131	0.000517	3.75851	-0.29798	1.46275	TMEM158	transmembrane protein 158 (gene/pseudogene)	25907	BF062629
202475_at	0.0132	0.000521	3.75589	-0.305205	0.449427	TMEM147	transmembrane protein 147	10430	NM_032635
200665_s_at	0.0132	0.000522	3.75493	-0.307854	0.556072	SPARC	secreted protein acidic and cysteine rich	6678	NM_003118
209464_at	0.0133	0.000528	3.7513	-0.31789	0.982387	AURKB	aurora kinase B	9212	AB011446
201204_s_at	0.0133	0.000528	3.75093	-0.318905	0.594467	RRBP1	ribosome binding protein 1	6238	AA706065
212219_at	0.0134	0.000536	3.74614	-0.332103	0.680301	PSME4	proteasome activator subunit 4	23198	D38521
201231_s_at	0.0135	0.000543	3.74158	-0.344668	0.499821	ENO1	enolase 1	2023	NM_001428
204166_at	0.0135	0.000544	3.74102	-0.346215	0.501293	SBNO2	strawberry notch homolog 2	22904	NM_014963
216531_at	0.0136	0.000547	3.73942	-0.350635	0.970807	YY2///MBTPS2	YY2 transcription factor///membrane bound transcription factor peptidase, site 2	404281///51360
207463_x_at	0.0136	0.000549	3.73845	-0.353306	1.1226	PRSS3	protease, serine 3	5646	NM_002771
214460_at	0.0136	0.00055	3.73766	-0.355464	0.994848	LSAMP	limbic system-associated membrane protein	4045	NM_002338
202667_s_at	0.0137	0.000554	3.73502	-0.362754	0.830331	SLC39A7	solute carrier family 39 member 7	7922	NM_006979
219098_at	0.0137	0.000555	3.7343	-0.364731	0.665896	MYBBP1A	MYB binding protein 1a	10514	NM_014520
202824_s_at	0.0137	0.000556	3.73364	-0.366544	0.592906	TCEB1	transcription elongation factor B subunit 1	6921	NM_005648
208044_s_at	0.0137	0.00056	3.7313	-0.372978	0.740987	PPARD	peroxisome proliferator activated receptor delta	5467	NM_006238
212552_at	0.0137	0.000561	3.73103	-0.373732	0.582226	HPCAL1	hippocalcin like 1	3241	BE617588
207768_at	0.0137	0.000562	3.73029	-0.375748	1.40406	EGR4	early growth response 4	1961	NM_001965
202283_at	0.0137	0.000562	3.7302	-0.376021	0.77491	SERPINF1	serpin family F member 1	5176	NM_002615
206074_s_at	0.0137	0.000563	3.72967	-0.377469	0.449683	HMGA1	high mobility group AT-hook 1	3159	NM_002131
202402_s_at	0.0138	0.000568	3.72651	-0.386165	0.42414	CARS	cysteinyl-tRNA synthetase	833	NM_001751
212834_at	0.0138	0.000569	3.72598	-0.387629	0.460445	DDX52	DEAD-box helicase 52	11056	BE963238
204647_at	0.0141	0.000584	3.71721	-0.411703	0.534986	HOMER3	homer scaffolding protein 3	9454	NM_004838
200611_s_at	0.0142	0.000588	3.71491	-0.418031	0.409446	WDR1	WD repeat domain 1	9948	AB010427
201465_s_at	0.0142	0.000591	3.71331	-0.42243	0.818506	JUN	Jun proto-oncogene, AP-1 transcription factor subunit	3725	BC002646
215075_s_at	0.0142	0.000592	3.71269	-0.42412	0.464699	GRB2	growth factor receptor bound protein 2	2885	L29511
204507_s_at	0.0144	0.0006	3.7083	-0.436173	0.742753	PPP3R1	protein phosphatase 3 regulatory subunit B, alpha	5534	NM_000945
57703_at	0.0144	0.000603	3.70665	-0.440694	0.37398	SENP5	SUMO1/sentrin specific peptidase 5	205564	N32782
200954_at	0.0145	0.000608	3.7039	-0.44824	0.527184	ATP6V0C	ATPase H+ transporting V0 subunit c	527	NM_001694
203382_s_at	0.0147	0.000618	3.69837	-0.463392	0.813483	APOE	apolipoprotein E	348	NM_000041
202901_x_at	0.0147	0.00062	3.69708	-0.466929	1.50801	CTSS	cathepsin S	1520	BC002642
216835_s_at	0.0148	0.000626	3.69408	-0.475157	0.486281	DOK1	docking protein 1	1796	AF035299
221021_s_at	0.0149	0.000631	3.69136	-0.482584	0.365497	CTNNBL1	catenin beta like 1	56259	NM_030877
204925_at	0.0149	0.000636	3.68893	-0.489251	0.49165	CTNS	cystinosin, lysosomal cystine transporter	1497	NM_004937
200643_at	0.015	0.000641	3.68623	-0.496622	0.387455	HDLBP	high density lipoprotein binding protein	3069	NM_005336
213562_s_at	0.015	0.000641	3.68602	-0.497198	0.854499	SQLE	squalene epoxidase	6713	BF979497
208751_at	0.0151	0.000646	3.68374	-0.503433	0.40277	NAPA	NSF attachment protein alpha	8775	BC001165
215023_s_at	0.0151	0.000649	3.68201	-0.508175	0.506719	PEX1	peroxisomal biogenesis factor 1	5189
209774_x_at	0.0152	0.000653	3.67963	-0.514685	1.45722	CXCL2	C-X-C motif chemokine ligand 2	2920	M57731
206546_at	0.0153	0.000659	3.67686	-0.522253	0.765772	SYCP2	synaptonemal complex protein 2	10388	NM_014258
220865_s_at	0.0154	0.000669	3.67162	-0.536553	0.469869	PDSS1	prenyl (decaprenyl) diphosphate synthase, subunit 1	23590	NM_014317
207053_at	0.0154	0.00067	3.67133	-0.537349	1.01028	SLC8A1	solute carrier family 8 member A1	6546	NM_021097
201666_at	0.0156	0.000678	3.66742	-0.548004	0.770843	TIMP1	TIMP metallopeptidase inhibitor 1	7076	NM_003254
217794_at	0.0157	0.000682	3.66508	-0.554403	0.459578	PRR13	proline rich 13	54458	NM_018457
202188_at	0.0157	0.000683	3.6646	-0.555714	0.458949	NUP93	nucleoporin 93	9688	NM_014669
217028_at	0.0159	0.000694	3.65952	-0.569552	1.58988	CXCR4	C-X-C motif chemokine receptor 4	7852	AJ224869
220104_at	0.0159	0.000694	3.65924	-0.570311	0.671044	ZC3HAV1	zinc finger CCCH-type containing, antiviral 1	56829	NM_020119
219810_at	0.016	0.000703	3.65516	-0.581432	0.722974	VCPIP1	valosin containing protein interacting protein 1	80124	NM_025054
211071_s_at	0.016	0.000704	3.65464	-0.582851	0.458784	MLLT11	myeloid/lymphoid or mixed-lineage leukemia; translocated to, 11	10962	BC006471
218327_s_at	0.0161	0.000707	3.65322	-0.586705	0.595684	SNAP29	synaptosome associated protein 29	9342	NM_004782
213911_s_at	0.0162	0.000715	3.6494	-0.597111	0.603506	H2AFZ	H2A histone family member Z	3015	BF718636
203936_s_at	0.0164	0.000725	3.6445	-0.610434	1.23186	MMP9	matrix metallopeptidase 9	4318	NM_004994
212501_at	0.0164	0.000726	3.64419	-0.611285	0.726084	CEBPB	CCAAT/enhancer binding protein beta	1051	AL564683
217676_at	0.0164	0.000726	3.64402	-0.611758	0.570006
209093_s_at	0.0164	0.000727	3.64344	-0.61333	0.634099	GBAP1///GBA	glucosylceramidase beta pseudogene 1///glucosylceramidase beta	2630///2629	K02920
219956_at	0.0164	0.000729	3.6425	-0.615868	0.888444	GALNT6	polypeptide N-acetylgalactosaminyltransferase 6	11226	NM_007210
217796_s_at	0.0164	0.00073	3.64235	-0.616287	0.509488	NPLOC4	NPL4 homolog, ubiquitin recognition factor	55666	NM_017921
221738_at	0.0164	0.000733	3.64103	-0.619875	0.59263	RALGAPB	Ral GTPase activating protein non-catalytic beta subunit	57148	BG236163
208232_x_at	0.0167	0.000747	3.63442	-0.63785	1.43405	NRG1	neuregulin 1	3084	L12260
53076_at	0.0168	0.000756	3.63014	-0.649468	0.403473	B4GALT7	beta-1,4-galactosyltransferase 7	11285
217769_s_at	0.017	0.000767	3.62549	-0.662068	0.498175	POMP	proteasome maturation protein	51371	NM_015932
209039_x_at	0.017	0.00077	3.62415	-0.665715	0.461211	EHD1	EH domain containing 1	10938	AF001434
209235_at	0.017	0.000773	3.62291	-0.669071	0.490515	CLCN7	chloride voltage-gated channel 7	1186
212268_at	0.017	0.000775	3.62181	-0.67205	0.784922	SERPINB1	serpin family B member 1	1992	NM_030666
216092_s_at	0.017	0.000776	3.62165	-0.672498	0.560806	SLC7A8	solute carrier family 7 member 8	23428	AL365347
221220_s_at	0.0172	0.000784	3.61798	-0.682433	0.474875	SCYL2	SCY1 like pseudokinase 2	55681	NM_017988
200616_s_at	0.0172	0.00079	3.61551	-0.689136	0.584635	MLEC	malectin	9761	BC000371
204541_at	0.0172	0.000791	3.61507	-0.690322	0.480305	SEC14L2	SEC14 like lipid binding 2	23541	NM_012429
222221_x_at	0.0172	0.000791	3.61496	-0.690627	0.683501	EHD1	EH domain containing 1	10938	AY007161
204531_s_at	0.0175	0.000809	3.60731	-0.711337	0.541614	BRCA1	BRCA1, DNA repair associated	672
214780_s_at	0.0176	0.000813	3.60569	-0.715716	0.43503	MYO9B	myosin IXB	4650
203775_at	0.0177	0.000818	3.60349	-0.72166	0.793795	SLC25A13	solute carrier family 25 member 13	10165	NM_014251
206999_at	0.0178	0.00083	3.59874	-0.734502	0.474004	IL12RB2	interleukin 12 receptor subunit beta 2	3595	NM_001559
218178_s_at	0.0179	0.000834	3.59705	-0.739072	0.372657	CHMP1B	charged multivesicular body protein 1B	57132	NM_020412
205809_s_at	0.0179	0.000835	3.59654	-0.740456	0.711711	WASL	Wiskott-Aldrich syndrome like	8976
218840_s_at	0.0179	0.000837	3.59574	-0.742592	0.792036	NADSYN1	NAD synthetase 1	55191	NM_018161
217217_at	0.0182	0.000852	3.58987	-0.758455	0.645948	LOC102723407///IGHV4-31///IGHM///IGHG4///IGHG1///IGHA2///IGHA1	putative V-set and immunoglobulin domain-containing-like protein IGHV4OR15-8///immunoglobulin heavy variable 4-31///immunoglobulin heavy constant mu///immunoglobulin heavy constant gamma 4 (G4m marker)///immunoglobulin heavy constant gamma 1 (G1m marker)///immunoglobulin heavy constant alpha 2 (A2m marker)///immunoglobulin heavy constant alpha 1	102723407///28396///3507///3503///3500///3494///3493	X95660
217854_s_at	0.0184	0.000863	3.5854	-0.770505	0.492881	POLR2E	RNA polymerase II subunit E	5434	NM_002695
200815_s_at	0.0184	0.000867	3.58377	-0.774919	0.732187	PAFAH1B1	platelet activating factor acetylhydrolase 1b regulatory subunit 1	5048	L13386
200039_s_at	0.0184	0.000869	3.58286	-0.777362	0.526062	PSMB2	proteasome subunit beta 2	5690	NM_002794
203826_s_at	0.0185	0.000875	3.58078	-0.782976	0.736962	PITPNM1	phosphatidylinositol transfer protein membrane associated 1	9600	NM_004910
218834_s_at	0.0187	0.000885	3.57666	-0.794085	0.451404	TMEM132A	transmembrane protein 132A	54972	NM_017870
212338_at	0.0187	0.000885	3.57663	-0.794154	0.741743	MYO1D	myosin ID	4642	AA621962
219159_s_at	0.0187	0.000887	3.57603	-0.795785	1.42415	SLAMF7	SLAM family member 7	57823	NM_021181
218295_s_at	0.0187	0.000889	3.57538	-0.797512	0.827989	NUP50	nucleoporin 50	10762	NM_007172
218982_s_at	0.0188	0.000894	3.57316	-0.803505	0.523285	MRPS17	mitochondrial ribosomal protein S17	51373	NM_015969
207396_s_at	0.0189	0.000904	3.56937	-0.813688	0.49457	ALG3	ALG3, alpha-1,3- mannosyltransferase	10195	NM_005787
219926_at	0.0189	0.000905	3.5693	-0.813891	1.21021	POPDC3	popeye domain containing 3	64208	NM_022361
220245_at	0.019	0.00091	3.56733	-0.819194	0.63673	SLC45A2	solute carrier family 45 member 2	51151	NM_016180
206134_at	0.019	0.000911	3.56676	-0.820729	1.59783	ADAMDEC1	ADAM like decysin 1	27299	NM_014479
48531_at	0.019	0.000913	3.56615	-0.822352	0.412352	TNIP2	TNFAIP3 interacting protein 2	79155	AA522816
209441_at	0.019	0.000914	3.56561	-0.823805	0.544812	RHOBTB2	Rho related BTB domain containing 2	23221	AY009093
201743_at	0.0191	0.000923	3.56246	-0.832282	1.06157	CD14	CD14 molecule	929	NM_000591
218473_s_at	0.0192	0.000925	3.56174	-0.834235	0.329974	COLGALT1	collagen beta(1-O)galactosyltransferase 1	79709	NM_024656
212021_s_at	0.0192	0.000926	3.56123	-0.835594	0.796008	MKI67	marker of proliferation Ki-67	4288	AU132185
206932_at	0.0194	0.000941	3.55586	-0.850019	0.903936	CH25H	cholesterol 25-hydroxylase	9023	NM_003956
221160_s_at	0.0194	0.000942	3.55528	-0.85157	2.07968	CABP5	calcium binding protein 5	56344	NM_019855
203591_s_at	0.0194	0.000951	3.55202	-0.860322	0.709716	CSF3R	colony stimulating factor 3 receptor	1441	NM_000760
202896_s_at	0.0199	0.000977	3.54305	-0.884379	0.52223	SIRPA	signal regulatory protein alpha	140885	NM_080792
205599_at	0.02	0.000991	3.53813	-0.897576	0.5811	TRAF1	TNF receptor associated factor 1	7185	NM_005658
202833_s_at	0.02	0.000992	3.53761	-0.898968	1.11384	SERPINA1	serpin family A member 1	5265	NM_000295
209393_s_at	0.0201	0.001	3.53512	-0.905623	0.490928	EIF4E2	eukaryotic translation initiation factor 4E family member 2	9470	AF047695
218232_at	0.0201	0.001	3.5349	-0.906224	1.16572	C1QA	complement C1q A chain	712	NM_015991
206643_at	0.0202	0.00101	3.53254	-0.912541	1.47378	HAL	histidine ammonia-lyase	3034	NM_002108
200822_x_at	0.0203	0.00101	3.53188	-0.914301	0.383696	TPI1	triosephosphate isomerase 1	7167	NM_000365
208112_x_at	0.0203	0.00102	3.52979	-0.919888	0.504322	EHD1	EH domain containing 1	10938	NM_006795
205423_at	0.0204	0.00102	3.52916	-0.921581	0.524488	AP1B1	adaptor related protein complex 1 beta 1 subunit	162	NM_001127
222029_x_at	0.0204	0.00102	3.52895	-0.922155	0.472033	MIR6834///PFDN6	microRNA 6834///prefoldin subunit 6	102465501///10471	NM_014260
210236_at	0.0204	0.00102	3.52821	-0.924125	0.577982	PPFIA1	PTPRF interacting protein alpha 1	8500	U22815
219148_at	0.0204	0.00102	3.52798	-0.924739	0.968043	PBK	PDZ binding kinase	55872	NM_018492
204420_at	0.0204	0.00102	3.52721	-0.926786	0.761167	FOSL1	FOS like 1, AP-1 transcription factor subunit	8061	BG251266
211949_s_at	0.0204	0.00103	3.52603	-0.929954	0.688394	NOLC1	nucleolar and coiled-body phosphoprotein 1	9221
208478_s_at	0.0205	0.00103	3.52463	-0.933685	0.564502	BAX	BCL2 associated X, apoptosis regulator	581	NM_004324
214170_x_at	0.0206	0.00104	3.52175	-0.941406	0.585955	FH	fumarate hydratase	2271
201199_s_at	0.0207	0.00105	3.51939	-0.9477	0.448725	PSMD1	proteasome 26S subunit, non-ATPase 1	5707	NM_002807
214536_at	0.0208	0.00105	3.51781	-0.951924	1.86406	SLURP1	secreted LY6/PLAUR domain containing 1	57152	NM_020427
49306_at	0.0208	0.00106	3.51583	-0.957207	1.03959	RASSF4	Ras association domain family member 4	83937
216449_x_at	0.0209	0.00106	3.51483	-0.959889	0.823034	HSP90B1	heat shock protein 90 beta family member 1	7184	AK025862
219493_at	0.0211	0.00108	3.5086	-0.976499	0.644107	SHCBP1	SHC binding and spindle associated 1	79801	NM_024745
219546_at	0.0212	0.00108	3.50779	-0.978658	0.738225	BMP2K	BMP2 inducible kinase	55589	NM_017593
217364_x_at	0.0215	0.00111	3.50058	-0.997875	0.6754
216397_s_at	0.0215	0.00111	3.50009	-0.999189	0.752133	MIR7112///BOP1	microRNA 7112///block of proliferation 1	102465906///23246	AK024840
220620_at	0.0215	0.00111	3.49946	-1.00084	2.14584	CRCT1	cysteine rich C-terminal 1	54544	NM_019060
201728_s_at	0.0215	0.00111	3.49807	-1.00455	0.576427	KIAA0100	KIAA0100	9703
206102_at	0.0217	0.00113	3.49445	-1.0142	0.523144	GINS1	GINS complex subunit 1	9837	NM_021067
217943_s_at	0.0218	0.00113	3.49336	-1.01708	0.548837	MAP7D1	MAP7 domain containing 1	55700	NM_018067
208785_s_at	0.0219	0.00114	3.49053	-1.02461	0.55517	MAP1LC3B	microtubule associated protein 1 light chain 3 beta	81631	BE893893
201042_at	0.0219	0.00114	3.49044	-1.02486	0.88113	TGM2	transglutaminase 2	7052
219684_at	0.0219	0.00114	3.48933	-1.02782	0.706458	RTP4	receptor transporter protein 4	64108	NM_022147
216250_s_at	0.022	0.00115	3.48733	-1.03313	0.809577	LPXN	leupaxin	9404	X77598
213008_at	0.022	0.00115	3.48637	-1.03568	0.799326	FANCI	Fanconi anemia complementation group I	55215	BG403615
211756_at	0.022	0.00116	3.48508	-1.03912	0.8336	PTHLH	parathyroid hormone like hormone	5744	BC005961
205778_at	0.022	0.00116	3.48487	-1.03968	2.02924	KLK7	kallikrein related peptidase 7	5650	NM_005046
214311_at	0.022	0.00116	3.48405	-1.04185	1.11008	ZFPL1	zinc finger protein like 1	7542
208540_x_at	0.0221	0.00116	3.48295	-1.04478	0.686964
215313_x_at	0.0221	0.00117	3.48147	-1.0487	0.482219	HLA-A	major histocompatibility complex, class I, A	3105
217716_s_at	0.0221	0.00117	3.48109	-1.0497	0.390507	SEC61A1	Sec61 translocon alpha 1 subunit	29927	NM_013336
205385_at	0.0221	0.00117	3.48082	-1.05044	0.80827	MDM2	MDM2 proto-oncogene	4193	M92424
205402_x_at	0.0224	0.00119	3.47544	-1.0647	0.779266	PRSS2	protease, serine 2	5645	NM_002770
219026_s_at	0.0225	0.0012	3.47303	-1.07109	0.876099	RASAL2	RAS protein activator like 2	9462	NM_004841
202307_s_at	0.0227	0.00121	3.46796	-1.08455	0.934458	TAP1	transporter 1, ATP binding cassette subfamily B member	6890	NM_000593
213336_at	0.0227	0.00122	3.46789	-1.08474	0.93246	BAZ1B	bromodomain adjacent to zinc finger domain 1B	9031	AI826454
213281_at	0.0227	0.00122	3.46703	-1.087	0.821378	JUN	Jun proto-oncogene, AP-1 transcription factor subunit	3725
204444_at	0.0228	0.00122	3.46581	-1.09024	0.714705	KIF11	kinesin family member 11	3832	NM_004523
202503_s_at	0.0229	0.00123	3.4636	-1.09609	0.905839	KIAA0101	KIAA0101	9768	NM_014736
204695_at	0.0231	0.00124	3.46078	-1.10356	1.01252	CDC25A	cell division cycle 25A	993	AI343459
221210_s_at	0.0231	0.00124	3.4597	-1.10643	0.808705	NPL	N-acetylneuraminate pyruvate lyase	80896	NM_030769
207710_at	0.0231	0.00125	3.4589	-1.10853	1.98142	LCE2B	late cornified envelope 2B	26239	NM_014357
217871_s_at	0.0233	0.00127	3.45387	-1.12183	0.53046	MIF	macrophage migration inhibitory factor (glycosylation-inhibiting factor)	4282	NM_002415
211624_s_at	0.0236	0.00128	3.44915	-1.13432	0.686558	DRD2	dopamine receptor D2	1813	M30625
214061_at	0.0236	0.00129	3.44711	-1.13971	0.532951	TBC1D31	TBC1 domain family member 31	93594	AI017564
202497_x_at	0.0237	0.0013	3.44492	-1.14549	1.02399	SLC2A3	solute carrier family 2 member 3	6515
202963_at	0.0238	0.0013	3.4441	-1.14765	0.609194	RFX5	regulatory factor X5	5993
202138_x_at	0.0238	0.0013	3.44365	-1.14884	0.397494	AIMP2	aminoacyl tRNA synthetase complex interacting multifunctional protein 2	7965	NM_006303
212246_at	0.0238	0.00131	3.44276	-1.1512	0.831624	MCFD2	multiple coagulation factor deficiency 2	90411	BE880828
207740_s_at	0.0239	0.00131	3.44127	-1.15512	0.431705	NUP62	nucleoporin 62	23636	NM_012346
204750_s_at	0.0239	0.00131	3.44076	-1.15646	1.20517	DSC2	desmocollin 2	1824
218672_at	0.0239	0.00132	3.44022	-1.15788	0.413767	TNFAIP8L2-SCNM1///SCNM1	TNFAIP8L2-SCNM1 readthrough///sodium channel modifier 1	100534012///79005	NM_024041
209124_at	0.0242	0.00133	3.4362	-1.16851	0.474332	MYD88	myeloid differentiation primary response 88	4615	U70451
203334_at	0.0242	0.00134	3.43512	-1.17136	0.426407	DHX8	DEAH-box helicase 8	1659	NM_004941
218961_s_at	0.0243	0.00134	3.43311	-1.17664	0.517114	PNKP	polynucleotide kinase 3'-phosphatase	11284	NM_007254
217599_s_at	0.0243	0.00135	3.43257	-1.17806	0.754958	MDFIC	MyoD family inhibitor domain containing	29969	BE910600
206725_x_at	0.0244	0.00136	3.42877	-1.18809	1.27305	BMP1	bone morphogenetic protein 1	649
214866_at	0.0244	0.00136	3.42852	-1.18874	0.544255	PLAUR	plasminogen activator, urokinase receptor	5329	X74039
203023_at	0.0244	0.00136	3.42851	-1.18876	0.455545	NOP16	NOP16 nucleolar protein	51491	NM_016391
205035_at	0.0245	0.00136	3.42787	-1.19044	0.382974	CTDP1	CTD phosphatase subunit 1	9150	NM_004715
204709_s_at	0.0245	0.00137	3.42729	-1.19198	1.03985	KIF23	kinesin family member 23	9493	NM_004856
203032_s_at	0.0245	0.00137	3.42671	-1.19351	0.454168	FH	fumarate hydratase	2271
217787_s_at	0.0245	0.00137	3.42511	-1.19772	0.660294	GALNT2	polypeptide N-acetylgalactosaminyltransferase 2	2590	AL525086
203484_at	0.0245	0.00138	3.42493	-1.1982	0.464057	SEC61G	Sec61 translocon gamma subunit	23480	NM_014302
201948_at	0.0245	0.00138	3.42457	-1.19915	0.699748	GNL2	G protein nucleolar 2	29889	NM_013285
201767_s_at	0.0246	0.00138	3.42256	-1.20444	0.643255	ELAC2	elaC ribonuclease Z 2	60528	NM_018127
200748_s_at	0.0249	0.00141	3.41736	-1.21811	0.436749	FTH1	ferritin heavy chain 1	2495	NM_002032
202083_s_at	0.025	0.00141	3.41553	-1.22291	0.718723	SEC14L1	SEC14 like lipid binding 1	6397
203508_at	0.025	0.00142	3.41407	-1.22675	1.06875	TNFRSF1B	TNF receptor superfamily member 1B	7133	NM_001066
205014_at	0.0251	0.00143	3.41241	-1.23111	0.685661	FGFBP1	fibroblast growth factor binding protein 1	9982	NM_005130
210138_at	0.0253	0.00144	3.40892	-1.24027	1.29723	RGS20	regulator of G-protein signaling 20	8601	AF074979
221790_s_at	0.0253	0.00144	3.40873	-1.24078	0.564038	LDLRAP1	low density lipoprotein receptor adaptor protein 1	26119	AL545035
217206_at	0.0258	0.00147	3.40203	-1.25837	0.96326				D00267
217691_x_at	0.026	0.00149	3.39694	-1.27169	0.713645	MIR6787///SLC16A3	microRNA 6787///solute carrier family 16 member 3	102465472///9123	AA853175
209344_at	0.026	0.00149	3.39681	-1.27204	0.712918	TPM4	tropomyosin 4	7171	BC002827
221484_at	0.0261	0.0015	3.39468	-1.27763	0.554072	B4GALT5	beta-1,4-galactosyltransferase 5	9334	BF691447
212141_at	0.0263	0.00151	3.39133	-1.28641	0.994944	MCM4	minichromosome maintenance complex component 4	4173
204806_x_at	0.0265	0.00153	3.38842	-1.29401	0.566536	HLA-F	major histocompatibility complex, class I, F	3134	NM_018950
219441_s_at	0.0269	0.00155	3.38231	-1.30999	0.451748	LRRK1	leucine rich repeat kinase 1	79705	NM_024652
200924_s_at	0.0269	0.00156	3.38145	-1.31222	0.519388	SLC3A2	solute carrier family 3 member 2	6520	NM_002394
220208_at	0.0269	0.00156	3.38145	-1.31223	1.09153	ADAMTS13	ADAM metallopeptidase with thrombospondin type 1 motif 13	11093
218755_at	0.0272	0.00157	3.37781	-1.32175	1.29907	KIF20A	kinesin family member 20A	10112	NM_005733
209140_x_at	0.0273	0.00159	3.37478	-1.32967	0.525334	HLA-B	major histocompatibility complex, class I, B	3106	L42024
206239_s_at	0.0273	0.00159	3.3736	-1.33274	0.590972	SPINK1	serine peptidase inhibitor, Kazal type 1	6690	NM_003122
204162_at	0.0273	0.00159	3.37334	-1.33342	1.46568	NDC80	NDC80, kinetochore complex component	10403	NM_006101
205269_at	0.0274	0.0016	3.37197	-1.33701	1.27717	LCP2	lymphocyte cytosolic protein 2	3937
205320_at	0.0275	0.00161	3.36928	-1.34401	0.510536	APC2	APC2, WNT signaling pathway regulator	10297	NM_005883
204654_s_at	0.0276	0.00162	3.36881	-1.34523	0.777907	TFAP2A	transcription factor AP-2 alpha	7020	NM_003220
205513_at	0.0276	0.00162	3.36735	-1.34905	1.08199	TCN1	transcobalamin 1	6947	NM_001062
209773_s_at	0.0276	0.00162	3.36729	-1.34919	0.557345	RRM2	ribonucleotide reductase regulatory subunit M2	6241	BC001886
201530_x_at	0.0277	0.00163	3.36675	-1.3506	0.366821	LOC101928634///SENP3-EIF4A1///SNORD10///SNORA48///SNORA67///EIF4A1	uncharacterized LOC101928634///SENP3-EIF4A1 readthrough (NMD candidate)///small nucleolar RNA, C/D box 10///small nucleolar RNA, H/ACA box 48///small nucleolar RNA, H/ACA box 67///eukaryotic translation initiation factor 4A1	101928634///100533955///652966///652965///26781///1973	NM_001416
200805_at	0.0277	0.00163	3.3652	-1.35466	0.508563	LMAN2	lectin, mannose binding 2	10960	NM_006816
212146_at	0.028	0.00165	3.36042	-1.3671	0.498931	PLEKHM2	pleckstrin homology and RUN domain containing M2	23207	AB020649
1405_i_at	0.028	0.00166	3.36028	-1.36748	1.89567	CCL5	C-C motif chemokine ligand 5	6352	M21121
209035_at	0.028	0.00166	3.35986	-1.36857	0.769245	MDK	midkine (neurite growth-promoting factor 2)	4192	M69148
213721_at	0.028	0.00166	3.35953	-1.36942	0.655132	SOX2	SRY-box 2	6657	L07335
208906_at	0.028	0.00166	3.35916	-1.37038	0.502545	HNRNPUL2-BSCL2///BSCL2	HNRNPUL2-BSCL2 readthrough (NMD candidate)///BSCL2, seipin lipid droplet biogenesis associated	100534595///26580	BC004911
222223_s_at	0.0281	0.00167	3.35685	-1.37639	1.1436	IL36RN	interleukin 36 receptor antagonist	26525	AF216693
207628_s_at	0.0281	0.00167	3.35631	-1.37782	0.432084	WBSCR22	Williams-Beuren syndrome chromosome region 22	114049	NM_017528
213274_s_at	0.0282	0.00168	3.35443	-1.38269	0.87187	CTSB	cathepsin B	1508
200853_at	0.0282	0.00168	3.3544	-1.38278	0.649307	H2AFZ	H2A histone family member Z	3015	NM_002106
206421_s_at	0.0283	0.00169	3.35307	-1.38625	1.69599	SERPINB7	serpin family B member 7	8710	NM_003784
219646_at	0.0283	0.00169	3.35274	-1.38711	0.543552	DEF8	differentially expressed in FDCP 8 homolog	54849	NM_017702
218661_at	0.0284	0.0017	3.35079	-1.39217	0.402376	NAA60	N(alpha)-acetyltransferase 60, NatF catalytic subunit	79903	NM_024845
201890_at	0.0284	0.0017	3.35046	-1.39302	0.958544	RRM2	ribonucleotide reductase regulatory subunit M2	6241	BE966236
213453_x_at	0.0288	0.00173	3.34452	-1.40847	0.475495	GAPDH	glyceraldehyde-3-phosphate dehydrogenase	2597	BF689355
33148_at	0.0288	0.00174	3.34346	-1.41122	0.614133	ZFR	zinc finger RNA binding protein	51663
212662_at	0.0289	0.00174	3.34218	-1.41454	0.494622	PVR	poliovirus receptor	5817	BE615277
38037_at	0.0289	0.00174	3.3421	-1.41476	0.802971	HBEGF	heparin binding EGF like growth factor	1839	M60278
209971_x_at	0.0291	0.00176	3.3391	-1.42254	0.38818	AIMP2	aminoacyl tRNA synthetase complex interacting multifunctional protein 2	7965
46142_at	0.0292	0.00177	3.33657	-1.42911	0.463447	LMF1	lipase maturation factor 1	64788
219742_at	0.0293	0.00179	3.3336	-1.4368	0.7657	PRR7	proline rich 7 (synaptic)	80758	NM_030567
205119_s_at	0.0294	0.0018	3.3301	-1.44587	0.567653	FPR1	formyl peptide receptor 1	2357	NM_002029
219608_s_at	0.0294	0.0018	3.3301	-1.44588	0.493795	FBXO38	F-box protein 38	81545	NM_030793
213446_s_at	0.0294	0.0018	3.33005	-1.446	0.490463	IQGAP1	IQ motif containing GTPase activating protein 1	8826
200756_x_at	0.0294	0.0018	3.32994	-1.44629	0.601099	CALU	calumenin	813	U67280
203879_at	0.0296	0.00182	3.32752	-1.45256	0.608399	PIK3CD	phosphatidylinositol-4,5-bisphosphate 3-kinase catalytic subunit delta	5293	U86453
212581_x_at	0.0298	0.00184	3.3236	-1.4627	0.411431	GAPDH	glyceraldehyde-3-phosphate dehydrogenase	2597	BE561479
220088_at	0.0299	0.00184	3.32237	-1.4659	1.40855	C5AR1	complement component 5a receptor 1	728	NM_001736
219227_at	0.0301	0.00186	3.31885	-1.475	0.457558	CCNJL	cyclin J like	79616	NM_024565
207592_s_at	0.0302	0.00187	3.31685	-1.48017	0.841529	HCN2	hyperpolarization activated cyclic nucleotide gated potassium channel 2	610	NM_001194
218072_at	0.0305	0.0019	3.31225	-1.49206	0.437582	COMMD9	COMM domain containing 9	29099	NM_014186
207667_s_at	0.0306	0.0019	3.31141	-1.49422	0.444511	LOC100996792///MAP2K3	dual specificity mitogen-activated protein kinase kinase 3///mitogen-activated protein kinase kinase 3	100996792///5606	NM_002756
204492_at	0.0308	0.00192	3.30822	-1.50248	0.710257	ARHGAP11A	Rho GTPase activating protein 11A	9824	NM_014783
205959_at	0.0309	0.00193	3.30663	-1.50657	0.675617	MMP13	matrix metallopeptidase 13	4322	NM_002427
208308_s_at	0.0309	0.00193	3.3063	-1.50742	0.503297	GPI	glucose-6-phosphate isomerase	2821	NM_000175
219636_s_at	0.031	0.00194	3.30419	-1.51286	0.879552	ARMC9	armadillo repeat containing 9	80210	NM_025139
201004_at	0.031	0.00194	3.30407	-1.51319	0.603989	SSR4	signal sequence receptor subunit 4	6748	NM_006280
200757_s_at	0.0311	0.00195	3.30188	-1.51882	0.505389	CALU	calumenin	813	NM_001219
221882_s_at	0.0312	0.00196	3.30127	-1.52039	0.597269	TMEM8A	transmembrane protein 8A	58986
201500_s_at	0.0313	0.00197	3.2998	-1.5242	0.391304	PPP1R11	protein phosphatase 1 regulatory inhibitor subunit 11	6992	NM_021959
220258_s_at	0.0314	0.00198	3.29765	-1.52972	0.383185	WRAP53	WD repeat containing antisense to TP53	55135	NM_018081
219837_s_at	0.0315	0.00199	3.29527	-1.53585	1.03134	CYTL1	cytokine like 1	54360	NM_018659
202087_s_at	0.0316	0.00199	3.29486	-1.53693	0.634519	CTSL	cathepsin L	1514	NM_001912
211964_at	0.0316	0.002	3.29442	-1.53805	0.759258	COL4A2	collagen type IV alpha 2 chain	1284	X05610
208482_at	0.0317	0.002	3.29308	-1.54151	0.580326	SSTR1	somatostatin receptor 1	6751	NM_001049
219557_s_at	0.0317	0.00201	3.29272	-1.54243	0.47047	NRIP3	nuclear receptor interacting protein 3	56675	NM_020645
218556_at	0.0319	0.00202	3.29018	-1.54897	0.436935	ORMDL2	ORMDL sphingolipid biosynthesis regulator 2	29095	NM_014182
212884_x_at	0.0319	0.00202	3.29	-1.54944	0.753104	APOE	apolipoprotein E	348
217283_at	0.0319	0.00203	3.28909	-1.55178	0.900599				AF023203
31807_at	0.0319	0.00203	3.28875	-1.55264	0.410403	DDX49	DEAD-box helicase 49	54555
213842_x_at	0.0319	0.00203	3.28824	-1.55397	0.526297	NSUN5P2///NSUN5P1	NOP2/Sun RNA methyltransferase family member 5 pseudogene 2///NOP2/Sun RNA methyltransferase family member 5 pseudogene 1	260294///155400
222118_at	0.0319	0.00203	3.28814	-1.55421	0.434918	CENPN	centromere protein N	55839
206008_at	0.0319	0.00203	3.28766	-1.55545	0.964861	TGM1	transglutaminase 1	7051	NM_000359
221779_at	0.0321	0.00204	3.28593	-1.55991	0.671714	MICALL1	MICAL like 1	85377	BC001090
213275_x_at	0.0321	0.00205	3.28507	-1.56211	0.67671	CTSB	cathepsin B	1508
208302_at	0.0322	0.00205	3.28444	-1.56374	0.684374	HMHB1	histocompatibility minor HB-1	57824	NM_021182
217899_at	0.0324	0.00207	3.28072	-1.57329	0.360696	TMEM214	transmembrane protein 214	54867	NM_017727
214530_x_at	0.0324	0.00208	3.28018	-1.57468	1.4743	EPB41	erythrocyte membrane protein band 4.1	2035	AF156225
202848_s_at	0.0325	0.00209	3.27834	-1.5794	0.504771	GRK6	G protein-coupled receptor kinase 6	2870	BG423052
207239_s_at	0.0326	0.0021	3.27634	-1.58453	0.482683	CDK16	cyclin dependent kinase 16	5127	NM_006201
219110_at	0.0326	0.0021	3.27589	-1.58569	0.418516	GAR1	GAR1 ribonucleoprotein	54433	NM_018983
201342_at	0.0327	0.00211	3.27449	-1.58928	0.378493	SNRPC	small nuclear ribonucleoprotein polypeptide C	6631	NM_003093
206491_s_at	0.0327	0.00211	3.2739	-1.59081	0.446878	NAPA	NSF attachment protein alpha	8775	NM_003827
210712_at	0.0327	0.00212	3.27334	-1.59224	0.728199	LDHAL6B	lactate dehydrogenase A like 6B	92483	AY009108
221667_s_at	0.0327	0.00212	3.27322	-1.59255	1.13704	HSPB8	heat shock protein family B (small) member 8	26353	AF133207
204247_s_at	0.0329	0.00213	3.27161	-1.59668	0.524387	CDK5	cyclin dependent kinase 5	1020	NM_004935
205270_s_at	0.0329	0.00213	3.27131	-1.59745	0.751396	LCP2	lymphocyte cytosolic protein 2	3937	NM_005565
214511_x_at	0.0333	0.00217	3.26486	-1.61399	0.680469	FCGR1B	Fc fragment of IgG receptor Ib	2210	L03419
213932_x_at	0.0333	0.00217	3.26468	-1.61443	0.404039	HLA-A	major histocompatibility complex, class I, A	3105
221759_at	0.0336	0.00219	3.26141	-1.6228	0.643166	G6PC3	glucose-6-phosphatase catalytic subunit 3	92579	AL583123
221875_x_at	0.0336	0.00219	3.2613	-1.62311	0.578208	HLA-F	major histocompatibility complex, class I, F	3134
217580_x_at	0.0336	0.00219	3.26085	-1.62426	0.831453
214636_at	0.0339	0.00222	3.25684	-1.6345	0.829073	CALCB	calcitonin related polypeptide beta	797	AA747379
202030_at	0.0339	0.00223	3.25557	-1.63776	0.472632	BCKDK	branched chain ketoacid dehydrogenase kinase	10295	NM_005881
203727_at	0.0339	0.00223	3.25555	-1.63782	0.502326	SKIV2L	Ski2 like RNA helicase	6499	NM_006929
203561_at	0.0339	0.00223	3.25521	-1.63868	0.908584	FCGR2A	Fc fragment of IgG receptor IIa	2212	NM_021642
209642_at	0.034	0.00224	3.25299	-1.64435	0.606423	BUB1	BUB1 mitotic checkpoint serine/threonine kinase	699	AF043294
203185_at	0.0341	0.00225	3.25141	-1.64841	0.639172	RASSF2	Ras association domain family member 2	9770	NM_014737
201340_s_at	0.0341	0.00226	3.25047	-1.65078	0.849476	ENC1	ectodermal-neural cortex 1	8507	AF010314
202237_at	0.0342	0.00227	3.24899	-1.65457	1.08566	LOC101928916///NNMT	uncharacterized LOC101928916///nicotinamide N-methyltransferase	101928916///4837	NM_006169
219249_s_at	0.0342	0.00227	3.24896	-1.65466	0.748401	FKBP10	FK506 binding protein 10	60681	NM_021939
210609_s_at	0.0343	0.00227	3.24796	-1.65721	0.342895	TP53I3	tumor protein p53 inducible protein 3	9540	BC000474
204014_at	0.0343	0.00228	3.24734	-1.65878	0.975565	DUSP4	dual specificity phosphatase 4	1846	NM_001394
214427_at	0.0343	0.00228	3.24688	-1.65998	0.436286	NOP2	NOP2 nucleolar protein	4839	NM_006170
200743_s_at	0.0344	0.0023	3.24438	-1.66635	0.553661	TPP1	tripeptidyl peptidase 1	1200	NM_000391
202095_s_at	0.0344	0.0023	3.2438	-1.66783	0.706925	BIRC5	baculoviral IAP repeat containing 5	332	NM_001168
203820_s_at	0.0344	0.0023	3.24363	-1.66826	0.614386	IGF2BP3	insulin like growth factor 2 mRNA binding protein 3	10643	NM_006547
205634_x_at	0.0345	0.00231	3.24277	-1.67046	0.530779	ZDHHC24	zinc finger DHHC-type containing 24	254359	NM_024298
207381_at	0.0345	0.00231	3.24192	-1.67264	1.276	ALOX12B	arachidonate 12-lipoxygenase, 12R type	242	NM_001139
213918_s_at	0.0345	0.00231	3.24177	-1.67302	0.66455	NIPBL	NIPBL, cohesin loading factor	25836
204638_at	0.0345	0.00232	3.24169	-1.67322	0.665258	ACP5	acid phosphatase 5, tartrate resistant	54	NM_001611
201464_x_at	0.0345	0.00232	3.24136	-1.67407	0.634423	JUN	Jun proto-oncogene, AP-1 transcription factor subunit	3725	BG491844
206571_s_at	0.0345	0.00232	3.24114	-1.67462	0.498325	MAP4K4	mitogen-activated protein kinase kinase kinase kinase 4	9448	NM_004834
201206_s_at	0.0346	0.00233	3.23981	-1.67801	0.577516	RRBP1	ribosome binding protein 1	6238	NM_004587
214642_x_at	0.0347	0.00234	3.23808	-1.68242	1.07033	MAGEA10-MAGEA5///MAGEA5	MAGEA10-MAGEA5 readthrough///MAGE family member A5	100533997///4104	AI200443
207165_at	0.0348	0.00235	3.23614	-1.68737	1.00609	HMMR	hyaluronan mediated motility receptor	3161	NM_012485
202998_s_at	0.035	0.00237	3.23335	-1.69447	0.647968	LOXL2	lysyl oxidase like 2	4017	NM_002318
217749_at	0.035	0.00237	3.23328	-1.69466	0.459731	COPG1	coatomer protein complex subunit gamma 1	22820	NM_016128
209218_at	0.035	0.00237	3.23306	-1.69521	0.757524	SQLE	squalene epoxidase	6713	AF098865
218384_at	0.035	0.00238	3.2324	-1.69691	0.45948	CARHSP1	calcium regulated heat stable protein 1	23589	NM_014316
207144_s_at	0.0351	0.00238	3.23175	-1.69855	1.40362	CITED1	Cbp/p300 interacting transactivator with Glu/Asp rich carboxy-terminal domain 1	4435	NM_004143
212162_at	0.0352	0.00239	3.22991	-1.70323	0.389897	KIDINS220	kinase D-interacting substrate 220kDa	57498	AK022873
221819_at	0.0354	0.00241	3.22686	-1.711	0.326436	RAB35	RAB35, member RAS oncogene family	11021	BF791960
209953_s_at	0.0354	0.00242	3.22618	-1.71272	0.413296	CDC37	cell division cycle 37	11140	U63131
209247_s_at	0.0355	0.00244	3.22347	-1.71963	0.339683	ABCF2	ATP binding cassette subfamily F member 2	10061	BC001661
220727_at	0.0355	0.00244	3.22328	-1.7201	1.57289	KCNK10	potassium two pore domain channel subfamily K member 10	54207	NM_021161
212942_s_at	0.0356	0.00245	3.22201	-1.72332	0.714071	CEMIP	cell migration inducing hyaluronan binding protein	57214	AB033025
209100_at	0.0357	0.00246	3.22071	-1.72663	0.346364	IFRD2	interferon related developmental regulator 2	7866	BC001327
201670_s_at	0.0357	0.00246	3.21996	-1.72854	0.525236	MARCKS	myristoylated alanine rich protein kinase C substrate	4082	M68956
214438_at	0.0357	0.00246	3.21975	-1.72907	0.467114	HLX	H2.0 like homeobox	3142	M60721
208046_at	0.0362	0.0025	3.21485	-1.74153	0.503994	HIST1H4A	histone cluster 1, H4a	8359	NM_003538
202082_s_at	0.0364	0.00251	3.21266	-1.74707	0.512019	SEC14L1	SEC14 like lipid binding 1	6397	AV748469
201601_x_at	0.0368	0.00255	3.20719	-1.76096	0.576775	IFITM2///IFITM1	interferon induced transmembrane protein 2///interferon induced transmembrane protein 1	10581///8519	NM_003641
213547_at	0.0368	0.00256	3.20641	-1.76292	0.531447	CAND2	cullin associated and neddylation dissociated 2 (putative)	23066	AB014567
204766_s_at	0.0369	0.00256	3.20514	-1.76614	0.648316	NUDT1	nudix hydrolase 1	4521	NM_002452
203213_at	0.0369	0.00256	3.2051	-1.76626	0.830975	CDK1	cyclin dependent kinase 1	983	AL524035
203573_s_at	0.0369	0.00257	3.20497	-1.76659	0.460522	RABGGTA	Rab geranylgeranyltransferase alpha subunit	5875	NM_004581
209806_at	0.0369	0.00257	3.20487	-1.76683	0.76074	HIST1H2BK	histone cluster 1, H2bk	85236	BC000893
200910_at	0.0371	0.00259	3.20142	-1.77558	0.552795	LOC101927137///CCT3	uncharacterized LOC101927137///chaperonin containing TCP1 subunit 3	101927137///7203	NM_005998
201315_x_at	0.0372	0.0026	3.19989	-1.77944	0.429012	IFITM2	interferon induced transmembrane protein 2	10581	NM_006435
209880_s_at	0.0372	0.00261	3.1992	-1.78119	0.667176	SELPLG	selectin P ligand	6404	U02297
213617_s_at	0.0374	0.00262	3.19706	-1.78662	0.388832	TPGS2	tubulin polyglutamylase complex subunit 2	25941
204170_s_at	0.0374	0.00263	3.1957	-1.79005	0.883751	CKS2	CDC28 protein kinase regulatory subunit 2	1164	NM_001827
214282_at	0.0374	0.00263	3.1956	-1.79032	0.66621
210220_at	0.0375	0.00264	3.19415	-1.79398	0.468715	FZD2	frizzled class receptor 2	2535	L37882
202111_at	0.0377	0.00266	3.19226	-1.79874	0.456461	SLC4A2	solute carrier family 4 member 2	6522	NM_003040
212015_x_at	0.0377	0.00266	3.19158	-1.80046	0.279169	MIR4745///PTBP1	microRNA 4745///polypyrimidine tract binding protein 1	100616459///5725	BF690062
203418_at	0.0381	0.0027	3.18721	-1.81151	0.453106	CCNA2	cyclin A2	890	NM_001237
213875_x_at	0.0381	0.0027	3.18717	-1.81161	0.497345	C6orf62	chromosome 6 open reading frame 62	81688	BG252842
200615_s_at	0.0381	0.0027	3.18713	-1.81172	0.458751	AP2B1	adaptor related protein complex 2 beta 1 subunit	163	AL567295
213773_x_at	0.0382	0.00271	3.18499	-1.81711	0.378033	NSUN5	NOP2/Sun RNA methyltransferase family member 5	55695	AW248552
52741_at	0.0382	0.00271	3.18484	-1.81751	0.422451	TRMT61A	tRNA methyltransferase 61A	115708	AI962879
209014_at	0.0382	0.00272	3.1844	-1.81861	0.456986	MAGED1	MAGE family member D1	9500	AF217963
203055_s_at	0.0382	0.00272	3.18428	-1.81891	0.317979	LOC100505585///ARHGEF1	uncharacterized LOC100505585///Rho guanine nucleotide exchange factor 1	100505585///9138	NM_004706
217835_x_at	0.0388	0.00276	3.17818	-1.8343	0.487224	TGIF2-C20orf24///C20orf24	TGIF2-C20orf24 readthrough///chromosome 20 open reading frame 24	100527943///55969	NM_018840
204632_at	0.0388	0.00277	3.1775	-1.83602	0.440374	RPS6KA4	ribosomal protein S6 kinase A4	8986	NM_003942
58696_at	0.0389	0.00278	3.17571	-1.84054	0.346511	EXOSC4	exosome component 4	54512	AL039469
219709_x_at	0.0391	0.0028	3.1732	-1.84685	0.613803	FAM173A	family with sequence similarity 173 member A	65990	NM_023933
204044_at	0.0393	0.00282	3.1705	-1.85366	0.925472	QPRT	quinolinate phosphoribosyltransferase	23475	NM_014298
213542_at	0.0393	0.00283	3.17018	-1.85447	0.592798	ZNF710	zinc finger protein 710	374655	AI246730
211802_x_at	0.0399	0.00288	3.16287	-1.87286	0.963266	CACNA1G	calcium voltage-gated channel subunit alpha1 G	8913	AF227750
37793_r_at	0.0399	0.00289	3.16231	-1.87425	0.490921	RAD51D	RAD51 paralog D	5892	AF034956
218758_s_at	0.0402	0.00291	3.1592	-1.88207	0.400859	RRP1	ribosomal RNA processing 1	8568	NM_003683
204768_s_at	0.0402	0.00291	3.15908	-1.88239	0.430746	FEN1	flap structure-specific endonuclease 1	2237	NM_004111
204203_at	0.0403	0.00293	3.15781	-1.88557	0.512084	CEBPG	CCAAT/enhancer binding protein gamma	1054	NM_001806
200055_at	0.0406	0.00295	3.15534	-1.89178	0.4394	TAF10	TATA-box binding protein associated factor 10	6881	NM_006284
220238_s_at	0.0406	0.00295	3.15467	-1.89345	0.776055	KLHL7	kelch like family member 7	55975	NM_018846
206192_at	0.0408	0.00297	3.15286	-1.89799	1.75908	CDSN	corneodesmosin	1041	L20815
217545_at	0.0408	0.00297	3.15265	-1.89852	0.687494	MYH14	myosin, heavy chain 14, non-muscle	79784
220537_at	0.0409	0.00298	3.15115	-1.9023	0.647055	ASB12///MTMR8	ankyrin repeat and SOCS box containing 12///myotubularin related protein 8	142689///55613	NM_017677
207157_s_at	0.041	0.00299	3.1493	-1.90692	0.34777	GNG5	G protein subunit gamma 5	2787	NM_005274
203567_s_at	0.0411	0.003	3.14866	-1.90852	0.512527	TRIM38	tripartite motif containing 38	10475	AU157590
209373_at	0.0412	0.00301	3.14716	-1.9123	0.881993	MALL	mal, T-cell differentiation protein like	7851	BC003179
203381_s_at	0.0412	0.00302	3.14642	-1.91414	0.810466	APOE	apolipoprotein E	348
210999_s_at	0.0419	0.00307	3.13991	-1.93046	0.401165	GRB10	growth factor receptor bound protein 10	2887	U66065
207183_at	0.0419	0.00307	3.13976	-1.93082	1.01582	GPR19	G protein-coupled receptor 19	2842	NM_006143
213798_s_at	0.042	0.00309	3.13836	-1.93432	0.436328	CAP1	adenylate cyclase associated protein 1	10487
207653_at	0.0422	0.00311	3.13523	-1.94216	0.717283	FOXD2	forkhead box D2	2306	NM_004474
203390_s_at	0.0424	0.00313	3.13309	-1.94752	0.484584	KIF3C	kinesin family member 3C	3797	NM_002254
206472_s_at	0.0427	0.00316	3.13027	-1.95456	0.453059	TLE3	transducin like enhancer of split 3	7090	NM_005078
202257_s_at	0.0427	0.00316	3.13008	-1.95502	0.468526	CD2BP2	CD2 cytoplasmic tail binding protein 2	10421	NM_006110
221591_s_at	0.0428	0.00317	3.12819	-1.95975	0.450311	FAM64A	family with sequence similarity 64 member A	54478	BC005004
201644_at	0.0429	0.00319	3.12692	-1.96293	0.598018	TSTA3	tissue specific transplantation antigen P35B	7264	NM_003313
202323_s_at	0.043	0.0032	3.12587	-1.96554	0.581692	ACBD3	acyl-CoA binding domain containing 3	64746	AI636775
201577_at	0.043	0.0032	3.12576	-1.96582	0.509108	NME1	NME/NM23 nucleoside diphosphate kinase 1	4830	NM_000269
209911_x_at	0.0439	0.00328	3.11638	-1.98921	0.630015	HIST1H2BD	histone cluster 1, H2bd	3017	BC002842
218266_s_at	0.0439	0.00328	3.11613	-1.98984	0.484791	NCS1	neuronal calcium sensor 1	23413	NM_014286
201673_s_at	0.0439	0.00329	3.11542	-1.99161	0.328664	GYS1	glycogen synthase 1	2997	NM_002103
221141_x_at	0.0439	0.00329	3.11501	-1.99264	0.405224	EPN1	epsin 1	29924	NM_013333
204655_at	0.044	0.0033	3.1139	-1.9954	1.45766	CCL5	C-C motif chemokine ligand 5	6352	NM_002985
216596_at	0.044	0.00331	3.11305	-1.9975	1.06631	DKFZP434L187	uncharacterized LOC26082	26082	AL117445
208579_x_at	0.0443	0.00334	3.11016	-2.00471	0.819283	H2BFS	H2B histone family member S	54145
202295_s_at	0.0444	0.00335	3.1084	-2.00907	0.739896	CTSH	cathepsin H	1512	NM_004390
202523_s_at	0.0444	0.00335	3.10815	-2.00969	0.435827	SPOCK2	sparc/osteonectin, cwcv and kazal-like domains proteoglycan (testican) 2	9806	AI952009
208736_at	0.0444	0.00336	3.10739	-2.01158	0.423499	ARPC3	actin related protein 2/3 complex subunit 3	10094	AF004561
213202_at	0.0444	0.00336	3.1071	-2.01231	0.610445	SETD1A	SET domain containing 1A	9739	N30342
214600_at	0.0444	0.00337	3.10688	-2.01286	0.424404	TEAD1	TEA domain transcription factor 1	7003	AW771935
209921_at	0.0445	0.00338	3.10592	-2.01526	1.27582	SLC7A11	solute carrier family 7 member 11	23657	AB040875
201396_s_at	0.0445	0.00338	3.10589	-2.01533	0.557711	SGTA	small glutamine rich tetratricopeptide repeat containing alpha	6449	NM_003021
201641_at	0.0446	0.00339	3.10444	-2.01894	1.23122	BST2	bone marrow stromal cell antigen 2	684	NM_004335
202875_s_at	0.0446	0.00339	3.10431	-2.01926	0.522753	PBX2	PBX homeobox 2	5089	BE397715
202827_s_at	0.0447	0.0034	3.103	-2.02251	0.598788	MMP14	matrix metallopeptidase 14	4323	AU149305
215760_s_at	0.0447	0.00341	3.10256	-2.02359	0.567481	SBNO2	strawberry notch homolog 2	22904
209179_s_at	0.0447	0.00341	3.10246	-2.02385	0.452936	MBOAT7	membrane bound O-acyltransferase domain containing 7	79143	BC003164
221063_x_at	0.0448	0.00343	3.10053	-2.02865	0.386013	RNF123	ring finger protein 123	63891	NM_022064
209037_s_at	0.0449	0.00343	3.09998	-2.03002	0.883706	EHD1	EH domain containing 1	10938
217225_x_at	0.0449	0.00344	3.09871	-2.03316	0.338326	LOC101060373///NOMO3///NOMO2///NOMO1	uncharacterized LOC101060373///NODAL modulator 3///NODAL modulator 2///NODAL modulator 1	101060373///408050///283820///23420	AL512687
205099_s_at	0.0451	0.00347	3.09572	-2.0406	0.58017	CCR1	C-C motif chemokine receptor 1	1230	NM_001295
218778_x_at	0.0455	0.00351	3.09197	-2.04988	0.514759	EPS8L1	EPS8 like 1	54869
220658_s_at	0.0455	0.00351	3.09175	-2.05044	0.481202	ARNTL2	aryl hydrocarbon receptor nuclear translocator like 2	56938	NM_020183
203802_x_at	0.0456	0.00352	3.09069	-2.05306	0.608645	NSUN5	NOP2/Sun RNA methyltransferase family member 5	55695	NM_018044
211302_s_at	0.0457	0.00352	3.09018	-2.05432	0.486175	PDE4B	phosphodiesterase 4B	5142	L20966
201087_at	0.0457	0.00353	3.0892	-2.05676	0.369723	PXN	paxillin	5829	NM_002859
204698_at	0.0459	0.00355	3.08788	-2.06003	1.63447	ISG20	interferon stimulated exonuclease gene 20	3669	NM_002201
222076_at	0.0463	0.00359	3.08311	-2.07183	0.561224	HBEGF	heparin binding EGF like growth factor	1839
212531_at	0.0465	0.00361	3.08125	-2.07643	1.40314	LCN2	lipocalin 2	3934	NM_005564
221020_s_at	0.0469	0.00364	3.07816	-2.08408	0.722009	SLC25A32	solute carrier family 25 member 32	81034	NM_030780
218429_s_at	0.0469	0.00365	3.07748	-2.08578	0.340239	C19orf66	chromosome 19 open reading frame 66	55337	NM_018381
206185_at	0.047	0.00365	3.07695	-2.08707	0.730746	CRYBB1	crystallin beta B1	1414	NM_001887
205098_at	0.047	0.00366	3.07618	-2.08898	0.6183	CCR1	C-C motif chemokine receptor 1	1230
202070_s_at	0.0471	0.00367	3.07565	-2.0903	0.377725	IDH3A	isocitrate dehydrogenase 3 (NAD(+)) alpha	3419	NM_005530
206060_s_at	0.0471	0.00367	3.0755	-2.09066	0.74134	PTPN22	protein tyrosine phosphatase, non-receptor type 22	26191	NM_015967
218356_at	0.0473	0.00369	3.07369	-2.09514	0.466263	MRM2	mitochondrial rRNA methyltransferase 2	29960	NM_013393
207571_x_at	0.0473	0.0037	3.07281	-2.0973	0.616392	THEMIS2	thymocyte selection associated family member 2	9473	NM_004848
209295_at	0.0474	0.00371	3.07174	-2.09996	0.629531	TNFRSF10B	TNF receptor superfamily member 10b	8795	AF016266
202718_at	0.0475	0.00372	3.07087	-2.10209	0.951677	IGFBP2	insulin like growth factor binding protein 2	3485	NM_000597
216325_x_at	0.0475	0.00372	3.07071	-2.10249	0.710123	RTEL1-TNFRSF6B///RTEL1	RTEL1-TNFRSF6B readthrough (NMD candidate)///regulator of telomere elongation helicase 1	100533107///51750
201527_at	0.0477	0.00375	3.06795	-2.1093	0.30203	LOC101927180///ATP6V1F	V-type proton ATPase subunit F pseudogene///ATPase H+ transporting V1 subunit F	101927180///9296	NM_004231
212801_at	0.0481	0.00378	3.065	-2.11659	0.451092	MIR1178///CIT	microRNA 1178///citron rho-interacting serine/threonine kinase	100302274///11113	AI861788
220453_at	0.0481	0.00378	3.06412	-2.11875	0.463791	PQLC2	PQ loop repeat containing 2	54896	NM_017765
218443_s_at	0.0481	0.00379	3.06375	-2.11967	0.42321	DAZAP1	DAZ associated protein 1	26528	NM_018959
205391_x_at	0.0482	0.0038	3.06262	-2.12245	0.82349	ANK1	ankyrin 1	286	M28880
213476_x_at	0.0482	0.0038	3.06261	-2.12247	0.521231	TUBB3	tubulin beta 3 class III	10381	AL565749
203645_s_at	0.0484	0.00382	3.06036	-2.12802	1.09162	CD163	CD163 molecule	9332	NM_004244
203915_at	0.0484	0.00382	3.06031	-2.12814	1.98362	CXCL9	C-X-C motif chemokine ligand 9	4283	NM_002416
203391_at	0.049	0.00388	3.05458	-2.14225	0.526541	FKBP2	FK506 binding protein 2	2286	NM_004470
55081_at	0.0491	0.0039	3.05338	-2.14521	0.433638	MICALL1	MICAL like 1	85377	W46406
212203_x_at	0.0493	0.00391	3.05202	-2.14855	0.385451	IFITM3	interferon induced transmembrane protein 3	10410	BF338947
200634_at	0.0494	0.00394	3.04943	-2.15492	0.451297	PFN1	profilin 1	5216	NM_005022
200967_at	0.0494	0.00394	3.04932	-2.15518	0.423525	PPIB	peptidylprolyl isomerase B	5479	NM_000942
32069_at	0.0494	0.00394	3.04898	-2.15603	0.471921	N4BP1	NEDD4 binding protein 1	9683	AB014515
212256_at	0.0494	0.00395	3.04869	-2.15673	0.519814	GALNT10	polypeptide N-acetylgalactosaminyltransferase 10	55568	BE906572
35617_at	0.0495	0.00396	3.04779	-2.15895	0.367972	MAPK7	mitogen-activated protein kinase 7	5598	U29725
213587_s_at	0.0495	0.00396	3.04714	-2.16054	0.767904	ATP6V0E2	ATPase H+ transporting V0 subunit e2	155066
203718_at	0.0495	0.00397	3.04685	-2.16126	0.4193	PNPLA6	patatin like phospholipase domain containing 6	10908	NM_006702
208436_s_at	0.0495	0.00397	3.04659	-2.1619	0.941781	IRF7	interferon regulatory factor 7	3665
207440_at	0.0497	0.00399	3.04504	-2.1657	0.414525	SLC35A2	solute carrier family 35 member A2	7355	NM_005660
