# Supplementary material for: Identification of differentially expressed methylated genes in melanoma versus nevi using bioinformatics methods
Source: PeerJ. 2020 Jun 3;8:e9273. doi: 10.7717/peerj.9273 (PMC7275674; doi:10.7717/peerj.9273)
Supplement: Supplemental Information 3 [file peerj-08-9273-s003.xlsx]

## Sheet: Sheet1
ID	adj.P.Val	P.Value	t	B	logFC	Gene.symbol	Gene.title	Gene.ID	UniGene.title	UniGene.ID	GenBank.Accession
209368_at	2.77e-22	2.49e-26	-17.6558	49.3991	-3.72071	EPHX2	epoxide hydrolase 2	2053			AF233336
206149_at	4.3e-21	9.65e-25	-16.4729	45.8471	-5.61331	CHP2	calcineurin like EF-hand protein 2	63928			NM_022097
219476_at	1.84e-20	5.8e-24	-15.9121	44.1013	-4.39783	C1orf116	chromosome 1 open reading frame 116	79098			NM_023938
204454_at	9.13e-20	4.1e-23	-15.3138	42.194	-1.76957	LDOC1	leucine zipper down-regulated in cancer 1	23641			NM_012317
200965_s_at	1.05e-19	5.2e-23	-15.2413	41.9599	-3.8073	ABLIM1	actin binding LIM protein 1	3983			NM_006720
213029_at	3.11e-19	1.82e-22	-14.8668	40.7384	-1.88226	NFIB	nuclear factor I B	4781			BG478428
209604_s_at	4.35e-19	2.73e-22	-14.7457	40.3396	-4.77113	GATA3	GATA binding protein 3	2625			BC003070
209290_s_at	7.59e-19	5.11e-22	-14.561	39.7272	-2.19023	NFIB	nuclear factor I B	4781			BC001283
201829_at	1e-18	7.18e-22	-14.4611	39.3944	-1.89604	NET1	neuroepithelial cell transforming 1	10276			AW263232
213456_at	2.34e-18	1.94e-21	-14.171	38.4195	-4.50202	SOSTDC1	sclerostin domain containing 1	25928			AI927000
219729_at	4.28e-18	4.14e-21	-13.9524	37.6778	-2.92956	PRRX2	paired related homeobox 2	51450			NM_016307
222256_s_at	4.28e-18	4.22e-21	-13.9469	37.659	-3.62096	JMJD7///JMJD7-PLA2G4B	jumonji domain containing 7///JMJD7-PLA2G4B readthrough	100137047///8681
208635_x_at	6.33e-18	6.77e-21	-13.8117	37.1967	-1.09972	NACA	nascent polypeptide-associated complex alpha subunit	4666			BF976260
203638_s_at	6.33e-18	6.82e-21	-13.8093	37.1885	-5.31875	FGFR2	fibroblast growth factor receptor 2	2263			NM_022970
204975_at	6.43e-18	7.22e-21	-13.7932	37.1333	-2.41235	EMP2	epithelial membrane protein 2	2013			NM_001424
204734_at	1.04e-17	1.22e-20	-13.6441	36.6207	-8.17407	KRT15	keratin 15	3866			NM_002275
205128_x_at	1.68e-17	2.27e-20	-13.4678	36.0102	-2.30485	PTGS1	prostaglandin-endoperoxide synthase 1	5742			NM_000962
202054_s_at	1.95e-17	2.71e-20	-13.4177	35.8362	-2.2616	ALDH3A2	aldehyde dehydrogenase 3 family member A2	224			NM_000382
201425_at	4.96e-17	7.35e-20	-13.1375	34.8557	-3.49483	ALDH2	aldehyde dehydrogenase 2 family (mitochondrial)	217			NM_000690
209656_s_at	5.46e-17	8.51e-20	-13.0966	34.7116	-3.42258	TMEM47	transmembrane protein 47	83604			AL136550
220412_x_at	5.7e-17	9.2e-20	-13.0749	34.6353	-3.65759	KCNK7	potassium two pore domain channel subfamily K member 7	10089			NM_005714
203074_at	7.37e-17	1.22e-19	-12.9957	34.3557	-3.97133	ANXA8L1///ANXA8	annexin A8-like 1///annexin A8	728113///653145
213800_at	1.08e-16	1.89e-19	-12.8751	33.9283	-4.54442	CFH	complement factor H	3075			X04697
216733_s_at	1.65e-16	3.11e-19	-12.7374	33.4379	-2.35026	GATM	glycine amidinotransferase	2628			X86401
211737_x_at	2.06e-16	4.07e-19	-12.6639	33.1751	-3.93586	PTN	pleiotrophin	5764			BC005916
218657_at	2.53e-16	5.21e-19	-12.5959	32.9311	-4.52068	RAPGEFL1	Rap guanine nucleotide exchange factor like 1	51195			NM_016339
200735_x_at	2.53e-16	5.33e-19	-12.5898	32.9093	-1.0986	NACA	nascent polypeptide-associated complex alpha subunit	4666			NM_005594
204718_at	2.64e-16	5.68e-19	-12.5724	32.8468	-2.88481	EPHB6	EPH receptor B6	2051			NM_004445
205325_at	2.81e-16	6.44e-19	-12.5379	32.7228	-3.53075	PHYHIP	phytanoyl-CoA 2-hydroxylase interacting protein	9796			NM_014759
203453_at	2.85e-16	6.66e-19	-12.529	32.6907	-4.95916	SCNN1A	sodium channel epithelial 1 alpha subunit	6337			NM_001038
213227_at	2.98e-16	7.08e-19	-12.512	32.6295	-1.64399	PGRMC2	progesterone receptor membrane component 2	10424			BE879873
218736_s_at	2.98e-16	7.22e-19	-12.5069	32.6112	-2.94785	PALMD	palmdelphin	54873			NM_017734
212741_at	3.24e-16	8e-19	-12.4788	32.5101	-3.21407	MAOA	monoamine oxidase A	4128			AA923354
209289_at	3.41e-16	8.87e-19	-12.4505	32.4081	-1.87833	NFIB	nuclear factor I B	4781			AI700518
203962_s_at	3.74e-16	1.01e-18	-12.4158	32.2824	-3.2768	NEBL	nebulette	10529			NM_006393
218849_s_at	5.53e-16	1.54e-18	-12.301	31.867	-2.12603	PPP1R13L	protein phosphatase 1 regulatory subunit 13 like	10848			NM_006663
207023_x_at	8.39e-16	2.37e-18	-12.1837	31.4407	-3.23761	KRT10	keratin 10	3858			NM_000421
218816_at	9.12e-16	2.66e-18	-12.1528	31.328	-3.98776	LRRC1	leucine rich repeat containing 1	55227			NM_018214
203081_at	1.24e-15	3.66e-18	-12.0668	31.0138	-2.34187	CTNNBIP1	catenin beta interacting protein 1	56998			NM_020248
206884_s_at	1.43e-15	4.38e-18	-12.0188	30.8383	-5.60816	SCEL	sciellin	8796			NM_003843
218807_at	1.51e-15	4.68e-18	-12.0006	30.7714	-2.30166	VAV3	vav guanine nucleotide exchange factor 3	10451			NM_006113
60528_at	1.56e-15	4.89e-18	-11.9891	30.7293	-1.42387	PLA2G4B///JMJD7-PLA2G4B	phospholipase A2 group IVB///JMJD7-PLA2G4B readthrough	100137049///8681			N71116
213050_at	1.65e-15	5.26e-18	-11.9692	30.6564	-3.87729	COBL	cordon-bleu WH2 repeat protein	23242			AA594937
215813_s_at	1.72e-15	5.56e-18	-11.9546	30.6028	-2.54977	PTGS1	prostaglandin-endoperoxide synthase 1	5742			S36219
220911_s_at	1.85e-15	6.05e-18	-11.932	30.5197	-3.55871	NYNRIN	NYN domain and retroviral integrase containing	57523			NM_025081
201667_at	1.87e-15	6.21e-18	-11.9248	30.493	-4.10206	GJA1	gap junction protein alpha 1	2697			NM_000165
211597_s_at	1.87e-15	6.3e-18	-11.9211	30.4794	-6.18495	HOPX	HOP homeobox	84525			AB059408
206276_at	1.92e-15	6.64e-18	-11.9072	30.4283	-6.44453	LY6D	lymphocyte antigen 6 complex, locus D	8581			NM_003695
216699_s_at	1.99e-15	7.04e-18	-11.8912	30.3695	-1.65357	KLK1	kallikrein 1	3816			L10038
202967_at	2.14e-15	7.68e-18	-11.8681	30.2847	-1.77005	GSTA4	glutathione S-transferase alpha 4	2941			NM_001512
202053_s_at	2.14e-15	7.86e-18	-11.8619	30.2617	-2.05639	ALDH3A2	aldehyde dehydrogenase 3 family member A2	224			L47162
204855_at	2.14e-15	7.86e-18	-11.8618	30.2613	-6.44025	SERPINB5	serpin family B member 5	5268			NM_002639
209603_at	2.25e-15	8.39e-18	-11.8444	30.1973	-4.0906	GATA3	GATA binding protein 3	2625
210096_at	2.27e-15	8.56e-18	-11.8392	30.178	-3.5276	CYP4B1	cytochrome P450 family 4 subfamily B member 1	1580			J02871
204400_at	2.46e-15	9.51e-18	-11.811	30.0741	-4.19665	EFS	embryonal Fyn-associated substrate	10278			NM_005864
218751_s_at	2.46e-15	9.54e-18	-11.8101	30.0707	-2.17237	FBXW7	F-box and WD repeat domain containing 7	55294			NM_018315
209602_s_at	2.46e-15	9.6e-18	-11.8085	30.0648	-5.35219	GATA3	GATA binding protein 3	2625
203961_at	2.87e-15	1.13e-17	-11.7645	29.9023	-4.02233	NEBL	nebulette	10529
206122_at	2.95e-15	1.19e-17	-11.7508	29.8517	-3.68192	SOX15	SRY-box 15	6665			NM_006942
213366_x_at	3.21e-15	1.36e-17	-11.7161	29.7231	-1.1635	ATP5C1	ATP synthase, H+ transporting, mitochondrial F1 complex, gamma polypeptide 1	509			AV711183
213687_s_at	3.21e-15	1.37e-17	-11.7141	29.7156	-1.13676	RPL35A	ribosomal protein L35a	6165			BE968801
203240_at	3.78e-15	1.64e-17	-11.6661	29.5378	-4.03139	FCGBP	Fc fragment of IgG binding protein	8857			NM_003890
213032_at	3.78e-15	1.65e-17	-11.6651	29.534	-2.05494	NFIB	nuclear factor I B	4781			AI186739
202286_s_at	3.86e-15	1.7e-17	-11.657	29.5041	-6.0503	TACSTD2	tumor-associated calcium signal transducer 2	4070			J04152
205109_s_at	3.99e-15	1.79e-17	-11.6433	29.4534	-2.63186	LOC101930241///ARHGEF4	rho guanine nucleotide exchange factor 4-like///Rho guanine nucleotide exchange factor 4	101930241///50649			NM_015320
213287_s_at	4.07e-15	1.84e-17	-11.635	29.4225	-3.13172	KRT10	keratin 10	3858			X14487
218552_at	4.27e-15	1.98e-17	-11.6166	29.3544	-2.53392	ECHDC2	enoyl-CoA hydratase domain containing 2	55268			NM_018281
205251_at	5.36e-15	2.56e-17	-11.5483	29.1002	-1.32007	PER2	period circadian clock 2	8864			NM_022817
213394_at	5.36e-15	2.58e-17	-11.5462	29.0924	-3.6385	MAPKBP1	mitogen-activated protein kinase binding protein 1	23005
213725_x_at	5.36e-15	2.6e-17	-11.5442	29.0848	-2.65732	XYLT1	xylosyltransferase 1	64131			AI693140
210633_x_at	5.39e-15	2.64e-17	-11.5401	29.0697	-2.74007	KRT10	keratin 10	3858			M19156
217969_at	5.76e-15	2.85e-17	-11.52	28.9949	-1.36383	VPS51	VPS51, GARP complex subunit	738			NM_013265
200810_s_at	5.77e-15	2.9e-17	-11.5148	28.9752	-1.3605	CIRBP	cold inducible RNA binding protein	1153			NM_001280
209212_s_at	6.04e-15	3.06e-17	-11.5004	28.9218	-3.2216	KLF5	Kruppel like factor 5	688			AB030824
202597_at	6.69e-15	3.42e-17	-11.4713	28.813	-2.54096	IRF6	interferon regulatory factor 6	3664			AU144284
204379_s_at	6.81e-15	3.51e-17	-11.4643	28.7869	-6.53089	FGFR3	fibroblast growth factor receptor 3	2261			NM_000142
218796_at	8.84e-15	4.72e-17	-11.3866	28.4965	-3.55871	FERMT1	fermitin family member 1	55612			NM_017671
206093_x_at	9.99e-15	5.38e-17	-11.352	28.367	-4.11504	TNXB///TNXA	tenascin XB///tenascin XA (pseudogene)	7148///7146
206453_s_at	1.12e-14	6.13e-17	-11.3177	28.2383	-2.55289	NDRG2	NDRG family member 2	57447			NM_016250
209309_at	1.14e-14	6.27e-17	-11.3119	28.2166	-4.36281	AZGP1	alpha-2-glycoprotein 1, zinc-binding	563			D90427
209558_s_at	1.35e-14	7.63e-17	-11.2602	28.0225	-3.9275	HIP1R	huntingtin interacting protein 1 related	9026			AB013384
206385_s_at	1.49e-14	8.53e-17	-11.2312	27.9137	-4.84025	ANK3	ankyrin 3, node of Ranvier (ankyrin G)	288			NM_020987
202712_s_at	1.49e-14	8.61e-17	-11.2286	27.9037	-2.58957	CKMT1A///CKMT1B	creatine kinase, mitochondrial 1A///creatine kinase, mitochondrial 1B	548596///1159			NM_020990
219497_s_at	1.49e-14	8.65e-17	-11.2274	27.899	-3.76327	BCL11A	B-cell CLL/lymphoma 11A	53335			NM_022893
205711_x_at	1.52e-14	8.98e-17	-11.2177	27.8627	-1.20895	ATP5C1	ATP synthase, H+ transporting, mitochondrial F1 complex, gamma polypeptide 1	509			NM_005174
209493_at	1.52e-14	9.12e-17	-11.2135	27.8469	-4.24925	PDZD2	PDZ domain containing 2	23037			AF338650
203786_s_at	1.52e-14	9.13e-17	-11.2132	27.8458	-3.93744	TPD52L1	tumor protein D52-like 1	7164			NM_003287
207720_at	1.52e-14	9.23e-17	-11.2105	27.8355	-7.21234	LOR	loricrin	4014			NM_000427
209466_x_at	1.52e-14	9.23e-17	-11.2104	27.8351	-2.98729	PTN	pleiotrophin	5764			M57399
210479_s_at	1.57e-14	9.65e-17	-11.1989	27.792	-2.46835	RORA	RAR related orphan receptor A	6095			L14611
207908_at	1.77e-14	1.1e-16	-11.1639	27.66	-4.13574	KRT2	keratin 2	3849			NM_000423
215536_at	1.78e-14	1.12e-16	-11.1599	27.6451	-3.17034	HLA-DQB2	major histocompatibility complex, class II, DQ beta 2	3120
209863_s_at	2.17e-14	1.39e-16	-11.1031	27.4308	-3.75816	TP63	tumor protein p63	8626			AF091627
218677_at	2.2e-14	1.43e-16	-11.0959	27.4036	-3.20822	S100A14	S100 calcium binding protein A14	57402			NM_020672
218901_at	2.37e-14	1.56e-16	-11.0727	27.3158	-1.96971	PLSCR4	phospholipid scramblase 4	57088			NM_020353
200635_s_at	2.44e-14	1.62e-16	-11.063	27.279	-2.83171	PTPRF	protein tyrosine phosphatase, receptor type F	5792			AU145351
209465_x_at	2.48e-14	1.66e-16	-11.0577	27.2591	-3.66776	PTN	pleiotrophin	5764			AL565812
206655_s_at	2.5e-14	1.68e-16	-11.054	27.2452	-2.56173	SEPT5-GP1BB///SEPT5///GP1BB	SEPT5-GP1BB readthrough///septin 5///glycoprotein Ib platelet beta subunit	100526833///5413///2812			NM_000407
213661_at	2.65e-14	1.8e-16	-11.0364	27.1785	-3.42685	PAMR1	peptidase domain containing associated with muscle regeneration 1	25891			AI671186
211986_at	2.66e-14	1.81e-16	-11.0343	27.1706	-1.53839	AHNAK	AHNAK nucleoprotein	79026			BG287862
203407_at	2.7e-14	1.85e-16	-11.0284	27.1484	-5.83933	PPL	periplakin	5493			NM_002705
219010_at	2.8e-14	1.93e-16	-11.0173	27.1063	-3.26289	C1orf106	chromosome 1 open reading frame 106	55765			NM_018265
205900_at	2.96e-14	2.06e-16	-11.0012	27.0453	-6.94424	KRT1	keratin 1	3848			NM_006121
205709_s_at	3.13e-14	2.21e-16	-10.9831	26.9766	-3.91164	CDS1	CDP-diacylglycerol synthase 1	1040			NM_001263
202826_at	3.13e-14	2.22e-16	-10.9813	26.97	-3.76422	SPINT1	serine peptidase inhibitor, Kunitz type 1	6692			NM_003710
203408_s_at	3.34e-14	2.38e-16	-10.9632	26.9011	-1.99091	SATB1	SATB homeobox 1	6304			NM_002971
205977_s_at	3.36e-14	2.41e-16	-10.9597	26.8879	-2.79075	EPHA1	EPH receptor A1	2041			NM_005232
217087_at	3.44e-14	2.49e-16	-10.9521	26.8589	-3.74519	C1orf68	chromosome 1 open reading frame 68	100129271			AF005081
204591_at	4.02e-14	2.94e-16	-10.9084	26.6932	-5.31266	CHL1	cell adhesion molecule L1 like	10752			NM_006614
208690_s_at	4.2e-14	3.11e-16	-10.8942	26.6392	-2.00192	PDLIM1	PDZ and LIM domain 1	9124			BC000915
218963_s_at	4.36e-14	3.26e-16	-10.8814	26.5904	-4.5053	KRT23	keratin 23	25984			NM_015515
215388_s_at	4.98e-14	3.78e-16	-10.8437	26.447	-3.96293	CFHR1///CFH	complement factor H related 1///complement factor H	3078///3075			X56210
221666_s_at	5.19e-14	4e-16	-10.8284	26.3889	-2.30158	PYCARD	PYD and CARD domain containing	29108			BC004470
213033_s_at	5.25e-14	4.09e-16	-10.8227	26.3673	-3.6434	NFIB	nuclear factor I B	4781			AI186739
212543_at	5.61e-14	4.43e-16	-10.8023	26.2895	-2.77608	AIM1	absent in melanoma 1	202			U83115
203126_at	5.67e-14	4.5e-16	-10.7982	26.2737	-2.50217	IMPA2	inositol monophosphatase 2	3613			NM_014214
206114_at	5.8e-14	4.64e-16	-10.7906	26.2447	-3.34813	EPHA4	EPH receptor A4	2043			NM_004438
218383_at	5.96e-14	4.79e-16	-10.782	26.2122	-1.15597	MIR4707///HAUS4	microRNA 4707///HAUS augmin like complex subunit 4	100616424///54930			NM_017815
220432_s_at	6.1e-14	4.93e-16	-10.7747	26.1841	-4.46875	CYP39A1	cytochrome P450 family 39 subfamily A member 1	51302			NM_016593
209550_at	6.15e-14	5e-16	-10.771	26.1703	-2.32149	NDN	necdin, MAGE family member	4692			U35139
206400_at	6.28e-14	5.13e-16	-10.7646	26.1456	-7.27418	LGALS7B///LGALS7	galectin 7B///galectin 7	653499///3963			NM_002307
204753_s_at	6.43e-14	5.28e-16	-10.757	26.1167	-2.6736	HLF	HLF, PAR bZIP transcription factor	3131
219909_at	7e-14	5.83e-16	-10.7313	26.0188	-3.2979	MMP28	matrix metallopeptidase 28	79148			NM_024302
217906_at	7e-14	5.84e-16	-10.7307	26.0162	-1.241	KLHDC2	kelch domain containing 2	23588			NM_014315
206023_at	7.01e-14	5.88e-16	-10.7291	26.0101	-4.48264	NMU	neuromedin U	10874			NM_006681
40016_g_at	7.39e-14	6.3e-16	-10.7113	25.9424	-2.45971	MAST4	microtubule associated serine/threonine kinase family member 4	375449			AB002301
204755_x_at	7.39e-14	6.33e-16	-10.71	25.9374	-3.43819	HLF	HLF, PAR bZIP transcription factor	3131			M95585
219410_at	7.42e-14	6.39e-16	-10.7074	25.9275	-3.49992	TMEM45A	transmembrane protein 45A	55076			NM_018004
216333_x_at	7.53e-14	6.52e-16	-10.7024	25.9081	-4.04915	TNXB///TNXA	tenascin XB///tenascin XA (pseudogene)	7148///7146			M25813
201983_s_at	8.07e-14	7.1e-16	-10.6804	25.824	-4.47569	EGFR	epidermal growth factor receptor	1956
202387_at	8.07e-14	7.14e-16	-10.6792	25.8194	-1.29415	BAG1	BCL2 associated athanogene 1	573			NM_004323
213369_at	8.3e-14	7.41e-16	-10.6694	25.7821	-4.85193	CDHR1	cadherin related family member 1	92211			AI825832
203726_s_at	8.64e-14	7.75e-16	-10.6578	25.7377	-3.34386	LAMA3	laminin subunit alpha 3	3909			NM_000227
213451_x_at	9.07e-14	8.18e-16	-10.6441	25.685	-4.36905	TNXB///TNXA	tenascin XB///tenascin XA (pseudogene)	7148///7146
201254_x_at	9.37e-14	8.51e-16	-10.6339	25.6461	-0.92917	RPS6	ribosomal protein S6	6194			NM_001010
201540_at	9.58e-14	8.77e-16	-10.6261	25.6162	-2.27399	FHL1	four and a half LIM domains 1	2273			NM_001449
200921_s_at	9.92e-14	9.12e-16	-10.6159	25.577	-1.42231	BTG1	BTG anti-proliferation factor 1	694			NM_001731
207955_at	1.07e-13	9.97e-16	-10.5931	25.4898	-3.75952	CCL27	C-C motif chemokine ligand 27	10850			NM_006664
221841_s_at	1.08e-13	1.02e-15	-10.5877	25.4692	-3.6268	KLF4	Kruppel like factor 4	9314			BF514079
201984_s_at	1.08e-13	1.02e-15	-10.5865	25.4646	-2.31272	EGFR	epidermal growth factor receptor	1956			NM_005228
200606_at	1.08e-13	1.03e-15	-10.5855	25.4608	-5.83203	DSP	desmoplakin	1832			NM_004415
205081_at	1.1e-13	1.04e-15	-10.5815	25.4454	-4.42396	CRIP1	cysteine rich protein 1	1396			NM_001311
206539_s_at	1.11e-13	1.06e-15	-10.5764	25.4258	-3.13508	CYP4F12	cytochrome P450 family 4 subfamily F member 12	66002			NM_023944
203179_at	1.11e-13	1.06e-15	-10.5762	25.4249	-1.6814	GALT	galactose-1-phosphate uridylyltransferase	2592			NM_000155
202022_at	1.12e-13	1.08e-15	-10.5725	25.4109	-1.19389	ALDOC	aldolase, fructose-bisphosphate C	230			NM_005165
206595_at	1.16e-13	1.12e-15	-10.5621	25.3708	-5.86281	CST6	cystatin E/M	1474			NM_001323
215239_x_at	1.21e-13	1.18e-15	-10.5497	25.3233	-1.71055	ZNF273	zinc finger protein 273	10793			AU132789
215243_s_at	1.23e-13	1.2e-15	-10.5451	25.3055	-1.90627	GJB3	gap junction protein beta 3	2707			AF099730
204773_at	1.35e-13	1.35e-15	-10.516	25.1939	-2.46253	IL11RA	interleukin 11 receptor subunit alpha	3590
213155_at	1.35e-13	1.35e-15	-10.5156	25.1925	-3.03625	LOC339166///WSCD1	uncharacterized LOC339166///WSC domain containing 1	339166///23302			AB011095
206156_at	1.37e-13	1.37e-15	-10.5108	25.174	-3.32581	GJB5	gap junction protein beta 5	2709			NM_005268
38340_at	1.37e-13	1.38e-15	-10.5091	25.1674	-1.45273	HIP1R	huntingtin interacting protein 1 related	9026			AB014555
205807_s_at	1.45e-13	1.47e-15	-10.4933	25.1068	-2.17965	TUFT1	tuftelin 1	7286			NM_020127
39248_at	1.48e-13	1.52e-15	-10.4846	25.073	-6.22141	AQP3	aquaporin 3 (Gill blood group)	360			N74607
205470_s_at	1.48e-13	1.53e-15	-10.4839	25.0704	-4.59467	KLK11	kallikrein related peptidase 11	11012			NM_006853
202350_s_at	1.55e-13	1.6e-15	-10.472	25.0249	-1.80393	LOC100506558///MATN2	uncharacterized LOC100506558///matrilin 2	100506558///4147			NM_002380
218692_at	1.6e-13	1.66e-15	-10.4616	24.9849	-1.47706	SYBU	syntabulin	55638			NM_017786
202429_s_at	1.66e-13	1.73e-15	-10.4515	24.9456	-1.4035	PPP3CA	protein phosphatase 3 catalytic subunit alpha	5530			AL353950
202136_at	1.73e-13	1.82e-15	-10.4385	24.8958	-0.878052	ZMYND11	zinc finger MYND-type containing 11	10771			BE250417
203917_at	1.97e-13	2.11e-15	-10.4003	24.7488	-3.71876	CXADR	coxsackie virus and adenovirus receptor	1525			NM_001338
211002_s_at	1.98e-13	2.13e-15	-10.3979	24.7394	-4.62778	TRIM29	tripartite motif containing 29	23650			AF230389
213135_at	2.02e-13	2.18e-15	-10.3921	24.7169	-2.7253	TIAM1	T-cell lymphoma invasion and metastasis 1	7074			U90902
205883_at	2.03e-13	2.22e-15	-10.388	24.7011	-1.60359	ZBTB16	zinc finger and BTB domain containing 16	7704			NM_006006
212665_at	2.13e-13	2.33e-15	-10.3755	24.653	-1.13068	TIPARP	TCDD inducible poly(ADP-ribose) polymerase	25976			AL556438
210347_s_at	2.14e-13	2.36e-15	-10.3724	24.641	-1.68705	BCL11A	B-cell CLL/lymphoma 11A	53335			AF080216
204952_at	2.16e-13	2.38e-15	-10.37	24.6316	-4.76597	LYPD3	LY6/PLAUR domain containing 3	27076			NM_014400
220056_at	2.21e-13	2.45e-15	-10.3624	24.6024	-1.92675	IL22RA1	interleukin 22 receptor subunit alpha 1	58985			NM_021258
212841_s_at	2.23e-13	2.48e-15	-10.3589	24.5891	-3.54128	PPFIBP2	PPFIA binding protein 2	8495
201257_x_at	2.28e-13	2.55e-15	-10.3525	24.5641	-0.938852	SNORD73A///RPS3A	small nucleolar RNA, C/D box 73A///ribosomal protein S3A	8944///6189			NM_001006
218440_at	2.45e-13	2.75e-15	-10.3326	24.4874	-1.18987	MCCC1	methylcrotonoyl-CoA carboxylase 1	56922			NM_020166
203355_s_at	2.45e-13	2.77e-15	-10.3312	24.4822	-2.99875	PSD3	pleckstrin and Sec7 domain containing 3	23362			NM_015310
204168_at	2.88e-13	3.31e-15	-10.2857	24.306	-2.07063	MGST2	microsomal glutathione S-transferase 2	4258			NM_002413
210774_s_at	2.94e-13	3.39e-15	-10.2799	24.2838	-0.966998	NCOA4	nuclear receptor coactivator 4	8031			AL162047
218499_at	3.29e-13	3.81e-15	-10.2497	24.167	-4.44607	STK26	serine/threonine protein kinase 26	51765			NM_016542
220403_s_at	3.39e-13	3.96e-15	-10.24	24.1295	-3.44817	TP53AIP1	tumor protein p53 regulated apoptosis inducing protein 1	63970			NM_022112
211382_s_at	3.44e-13	4.02e-15	-10.2359	24.1134	-1.83603	TACC2	transforming acidic coiled-coil containing protein 2	10579			AF220152
200705_s_at	3.44e-13	4.04e-15	-10.2348	24.1094	-0.924677	SNORA41///EEF1B2	small nucleolar RNA, H/ACA box 41///eukaryotic translation elongation factor 1 beta 2	619569///1933			NM_001959
210074_at	3.48e-13	4.1e-15	-10.2309	24.0941	-2.28419	CTSV	cathepsin V	1515			AF070448
218717_s_at	3.85e-13	4.56e-15	-10.2039	23.9897	-3.43571	P3H2	prolyl 3-hydroxylase 2	55214			NM_018192
204971_at	4.05e-13	4.86e-15	-10.1881	23.9283	-5.45937	CSTA	cystatin A	1475			NM_005213
208870_x_at	4.1e-13	4.96e-15	-10.1825	23.9065	-0.982098	ATP5C1	ATP synthase, H+ transporting, mitochondrial F1 complex, gamma polypeptide 1	509			BC000931
204990_s_at	4.1e-13	4.99e-15	-10.181	23.9008	-2.67223	ITGB4	integrin subunit beta 4	3691			NM_000213
33322_i_at	4.19e-13	5.15e-15	-10.173	23.8697	-4.32585	SFN	stratifin	2810			X57348
210426_x_at	4.21e-13	5.19e-15	-10.1711	23.8623	-2.66714	RORA	RAR related orphan receptor A	6095			U04897
205490_x_at	4.24e-13	5.25e-15	-10.168	23.8503	-3.37997	GJB3	gap junction protein beta 3	2707			BF060667
202890_at	4.68e-13	5.82e-15	-10.142	23.7496	-4.31177	MAP7	microtubule associated protein 7	9053			AW242297
201830_s_at	5.13e-13	6.49e-15	-10.1141	23.6414	-4.43966	NET1	neuroepithelial cell transforming 1	10276			NM_005863
218806_s_at	5.19e-13	6.59e-15	-10.1103	23.6263	-3.18752	VAV3	vav guanine nucleotide exchange factor 3	10451			AF118887
202351_at	5.43e-13	6.94e-15	-10.0971	23.5752	-1.37155	ITGAV	integrin subunit alpha V	3685			AI093579
220013_at	5.49e-13	7.04e-15	-10.0936	23.5616	-4.348	EPHX3	epoxide hydrolase 3	79852			NM_024794
221854_at	5.57e-13	7.17e-15	-10.089	23.5437	-6.64593	PKP1	plakophilin 1	5317
205778_at	5.61e-13	7.25e-15	-10.086	23.5323	-4.79102	KLK7	kallikrein related peptidase 7	5650			NM_005046
211467_s_at	5.81e-13	7.54e-15	-10.0762	23.4942	-2.73943	NFIB	nuclear factor I B	4781			U70862
219518_s_at	5.99e-13	7.8e-15	-10.0677	23.4609	-2.37509	ELL3	elongation factor for RNA polymerase II 3	80237			NM_025165
200795_at	6.21e-13	8.16e-15	-10.0561	23.4158	-2.04404	SPARCL1	SPARC like 1	8404			NM_004684
204872_at	6.26e-13	8.26e-15	-10.0531	23.4043	-2.89255	TLE4	transducin like enhancer of split 4	7091			NM_007005
200953_s_at	6.33e-13	8.38e-15	-10.0495	23.3904	-2.24213	CCND2	cyclin D2	894			NM_001759
221868_at	6.34e-13	8.43e-15	-10.0478	23.3838	-2.48951	PAIP2B	poly(A) binding protein interacting protein 2B	400961			AB032981
208798_x_at	6.46e-13	8.67e-15	-10.0408	23.3565	-2.5139	GOLGA8A	golgin A8 family member A	23015			AF204231
213397_x_at	6.57e-13	8.87e-15	-10.0349	23.3336	-2.24919	RNASE4	ribonuclease A family member 4	6038			AI761728
210715_s_at	6.64e-13	9e-15	-10.0314	23.32	-3.41307	SPINT2	serine peptidase inhibitor, Kunitz type 2	10653			AF027205
220744_s_at	6.89e-13	9.39e-15	-10.0205	23.2773	-2.71492	LOC101927266///IFT122	intraflagellar transport protein 122 homolog///intraflagellar transport 122	101927266///55764			NM_018262
201432_at	6.95e-13	9.51e-15	-10.0173	23.2651	-1.33505	CAT	catalase	847			NM_001752
220318_at	7.06e-13	9.7e-15	-10.0123	23.2457	-3.20426	EPN3	epsin 3	55040			NM_017957
218186_at	7.35e-13	1.01e-14	-10.0016	23.2038	-4.65928	RAB25	RAB25, member RAS oncogene family	57111			NM_020387
212204_at	7.41e-13	1.02e-14	-9.99838	23.1912	-1.56493	TMEM87A	transmembrane protein 87A	25963			AL049944
205363_at	7.58e-13	1.05e-14	-9.99205	23.1666	-4.0669	BBOX1	gamma-butyrobetaine hydroxylase 1	8424			NM_003986
206032_at	7.81e-13	1.09e-14	-9.98347	23.1332	-4.74722	DSC3	desmocollin 3	1825			AI797281
204942_s_at	7.97e-13	1.11e-14	-9.97763	23.1104	-3.33273	ALDH3B2	aldehyde dehydrogenase 3 family member B2	222			NM_000695
207843_x_at	8.18e-13	1.15e-14	-9.96983	23.08	-1.78421	CYB5A	cytochrome b5 type A	1528			NM_001914
220414_at	8.6e-13	1.21e-14	-9.95609	23.0265	-5.15827	CALML5	calmodulin like 5	51806			NM_017422
219395_at	8.64e-13	1.22e-14	-9.95408	23.0186	-2.94057	MIR6773///ESRP2	microRNA 6773///epithelial splicing regulatory protein 2	102466194///80004			NM_024939
218820_at	9.04e-13	1.29e-14	-9.94	22.9638	-2.27028	C14orf132	chromosome 14 open reading frame 132	56967
204754_at	9.18e-13	1.31e-14	-9.93542	22.9459	-2.13119	HLF	HLF, PAR bZIP transcription factor	3131			W60800
212914_at	9.4e-13	1.35e-14	-9.92785	22.9164	-1.22748	CBX7	chromobox 7	23492			AV648364
204036_at	9.46e-13	1.38e-14	-9.92389	22.9009	-3.34121	LPAR1	lysophosphatidic acid receptor 1	1902			AW269335
203585_at	9.51e-13	1.39e-14	-9.92112	22.8901	-2.88929	ZNF185	zinc finger protein 185 (LIM domain)	7739			NM_007150
213353_at	9.7e-13	1.43e-14	-9.91435	22.8637	-1.94356	ABCA5	ATP binding cassette subfamily A member 5	23461			BF693921
204503_at	9.81e-13	1.45e-14	-9.9109	22.8502	-3.64863	EVPL	envoplakin	2125			NM_001988
205185_at	1e-12	1.49e-14	-9.90444	22.825	-5.31385	SPINK5	serine peptidase inhibitor, Kazal type 5	11005			NM_006846
209679_s_at	1.02e-12	1.52e-14	-9.89844	22.8016	-2.86524	SMAGP	small cell adhesion glycoprotein	57228			BC003379
219109_at	1.02e-12	1.53e-14	-9.89756	22.7981	-2.08856	SPAG16	sperm associated antigen 16	79582			NM_024532
207324_s_at	1.02e-12	1.53e-14	-9.89694	22.7957	-5.39549	DSC1	desmocollin 1	1823			NM_004948
219597_s_at	1.06e-12	1.59e-14	-9.88675	22.7559	-4.77562	DUOX1	dual oxidase 1	53905			NM_017434
213285_at	1.06e-12	1.6e-14	-9.88574	22.752	-1.64232	TMEM30B	transmembrane protein 30B	161291			AV691491
221246_x_at	1.1e-12	1.67e-14	-9.8745	22.7081	-1.05918	TNS1	tensin 1	7145
218603_at	1.11e-12	1.69e-14	-9.87173	22.6973	-1.27692	HECA	hdc homolog, cell cycle regulator	51696			NM_016217
36129_at	1.15e-12	1.77e-14	-9.86082	22.6547	-1.24362	SGSM2	small G protein signaling modulator 2	9905			AB007857
218451_at	1.16e-12	1.78e-14	-9.85918	22.6483	-2.74702	CDCP1	CUB domain containing protein 1	64866			NM_022842
221726_at	1.16e-12	1.79e-14	-9.858	22.6437	-1.09046	RPL22	ribosomal protein L22	6146			BE250348
220026_at	1.16e-12	1.8e-14	-9.85562	22.6344	-3.39024	CLCA4	chloride channel accessory 4	22802			NM_012128
221476_s_at	1.18e-12	1.83e-14	-9.85189	22.6198	-1.02542	RPL15	ribosomal protein L15	6138			AF279903
206482_at	1.18e-12	1.84e-14	-9.85083	22.6156	-3.50935	PTK6	protein tyrosine kinase 6	5753			NM_005975
219998_at	1.22e-12	1.91e-14	-9.8407	22.576	-3.74093	LGALSL	galectin like	29094			NM_014181
215704_at	1.23e-12	1.94e-14	-9.83766	22.5642	-5.74061	FLG	filaggrin	2312
219532_at	1.23e-12	1.94e-14	-9.8374	22.5631	-4.15654	ELOVL4	ELOVL fatty acid elongase 4	6785			NM_022726
221249_s_at	1.26e-12	1.99e-14	-9.8305	22.5362	-1.19656	FAM117A	family with sequence similarity 117 member A	81558			NM_030802
209318_x_at	1.28e-12	2.04e-14	-9.82489	22.5143	-2.28115	PLAGL1	PLAG1 like zinc finger 1	5325			BG547855
33323_r_at	1.3e-12	2.08e-14	-9.81967	22.4938	-4.30979	SFN	stratifin	2810			X57348
214665_s_at	1.32e-12	2.1e-14	-9.8166	22.4818	-1.9878	CHP1	calcineurin like EF-hand protein 1	11261			AK000095
212391_x_at	1.35e-12	2.16e-14	-9.80987	22.4555	-0.881568	SNORD73A///RPS3A	small nucleolar RNA, C/D box 73A///ribosomal protein S3A	8944///6189
209763_at	1.36e-12	2.2e-14	-9.80555	22.4386	-3.03347	CHRDL1	chordin like 1	91851
205759_s_at	1.4e-12	2.26e-14	-9.79829	22.4102	-2.04736	SULT2B1	sulfotransferase family 2B member 1	6820			NM_004605
220016_at	1.4e-12	2.27e-14	-9.7977	22.4079	-3.25614	AHNAK	AHNAK nucleoprotein	79026			NM_024060
209793_at	1.78e-12	2.92e-14	-9.73378	22.1576	-2.94494	GRIA1	glutamate ionotropic receptor AMPA type subunit 1	2890			AL567302
202668_at	1.83e-12	3.01e-14	-9.72633	22.1284	-1.66223	EFNB2	ephrin B2	1948			BF001670
212242_at	1.83e-12	3.02e-14	-9.7257	22.1259	-3.01901	TUBA4A	tubulin alpha 4a	7277			AL565074
200010_at	1.83e-12	3.03e-14	-9.72445	22.121	-0.844021	RPL11	ribosomal protein L11	6135	NA	NA	NM_000975
206643_at	1.9e-12	3.17e-14	-9.71325	22.0772	-3.19189	HAL	histidine ammonia-lyase	3034			NM_002108
201820_at	1.92e-12	3.2e-14	-9.71078	22.0675	-6.63839	KRT5	keratin 5	3852			NM_000424
211734_s_at	1.93e-12	3.23e-14	-9.7087	22.0593	-3.0303	FCER1A	Fc fragment of IgE receptor Ia	2205			BC005912
218704_at	2.14e-12	3.59e-14	-9.68226	21.9556	-2.63009	RNF43	ring finger protein 43	54894			NM_017763
220635_at	2.14e-12	3.59e-14	-9.68165	21.9533	-3.16879	PSORS1C2	psoriasis susceptibility 1 candidate 2	170680			NM_014069
205127_at	2.32e-12	3.92e-14	-9.6599	21.8679	-2.71885	PTGS1	prostaglandin-endoperoxide synthase 1	5742			NM_000962
218180_s_at	2.45e-12	4.2e-14	-9.64275	21.8006	-3.08377	EPS8L2	EPS8 like 2	64787			NM_022772
209351_at	2.47e-12	4.23e-14	-9.64098	21.7936	-7.54497	KRT14	keratin 14	3861			BC002690
204455_at	2.48e-12	4.26e-14	-9.63905	21.7861	-5.4347	DST	dystonin	667			NM_001723
212537_x_at	2.58e-12	4.46e-14	-9.62742	21.7404	-0.798318	RPL17-C18orf32///SNORD58C///C18orf32///SNORD58A///SNORD58B///RPL17	RPL17-C18orf32 readthrough///small nucleolar RNA, C/D box 58C///chromosome 18 open reading frame 32///small nucleolar RNA, C/D box 58A///small nucleolar RNA, C/D box 58B///ribosomal protein L17	100526842///100124516///497661///26791///26790///6139			BE733979
210958_s_at	2.64e-12	4.59e-14	-9.62007	21.7115	-2.18748	MAST4	microtubule associated serine/threonine kinase family member 4	375449			BC003646
205014_at	2.68e-12	4.68e-14	-9.61538	21.6931	-3.18297	FGFBP1	fibroblast growth factor binding protein 1	9982			NM_005130
204719_at	2.75e-12	4.82e-14	-9.60812	21.6646	-4.30281	ABCA8	ATP binding cassette subfamily A member 8	10351			NM_007168
200632_s_at	2.9e-12	5.14e-14	-9.59159	21.5996	-1.7539	NDRG1	N-myc downstream regulated 1	10397			NM_006096
204151_x_at	2.94e-12	5.22e-14	-9.58796	21.5854	-2.3728	AKR1C1	aldo-keto reductase family 1 member C1	1645			NM_001353
204042_at	3.16e-12	5.65e-14	-9.56783	21.5062	-1.54438	WASF3	WAS protein family member 3	10810			AB020707
210847_x_at	3.31e-12	5.99e-14	-9.55336	21.4493	-2.73169	TNFRSF25	TNF receptor superfamily member 25	8718			AF026071
219936_s_at	3.35e-12	6.08e-14	-9.54956	21.4344	-3.78311	GPR87	G protein-coupled receptor 87	53836			NM_023915
202504_at	3.35e-12	6.09e-14	-9.54908	21.4325	-4.99505	TRIM29	tripartite motif containing 29	23650			NM_012101
202073_at	3.4e-12	6.2e-14	-9.54462	21.4149	-1.47467	OPTN	optineurin	10133			AV757675
219528_s_at	3.46e-12	6.34e-14	-9.5393	21.394	-2.67562	BCL11B	B-cell CLL/lymphoma 11B	64919			NM_022898
201286_at	3.5e-12	6.43e-14	-9.53553	21.3792	-3.10251	SDC1	syndecan 1	6382			Z48199
212957_s_at	3.57e-12	6.61e-14	-9.5288	21.3527	-2.87452	LINC01278	long intergenic non-protein coding RNA 1278	92249			AU154785
207114_at	3.76e-12	6.99e-14	-9.51459	21.2967	-3.30775	LY6G6C	lymphocyte antigen 6 complex, locus G6C	80740			NM_025261
222102_at	4.04e-12	7.56e-14	-9.49515	21.2202	-2.85013	GSTA3	glutathione S-transferase alpha 3	2940			NM_000847
204519_s_at	4.09e-12	7.69e-14	-9.49079	21.2031	-1.86548	PLLP	plasmolipin	51090			NM_015993
209732_at	4.13e-12	7.78e-14	-9.48779	21.1912	-2.71161	CLEC2B	C-type lectin domain family 2 member B	9976			BC005254
217783_s_at	4.22e-12	8e-14	-9.48088	21.164	-1.03761	YPEL5	yippee like 5	51646			NM_016061
214042_s_at	4.59e-12	8.77e-14	-9.45786	21.0733	-1.11886	RPL22	ribosomal protein L22	6146
218898_at	4.59e-12	8.77e-14	-9.45779	21.073	-1.11745	FAM57A	family with sequence similarity 57 member A	79850			NM_024792
206033_s_at	4.75e-12	9.15e-14	-9.44728	21.0316	-5.05972	DSC3	desmocollin 3	1825			NM_001941
207943_x_at	4.81e-12	9.29e-14	-9.44352	21.0168	-1.70456	PLAGL1	PLAG1 like zinc finger 1	5325			NM_006718
202179_at	4.86e-12	9.41e-14	-9.44029	21.0041	-1.91072	BLMH	bleomycin hydrolase	642			NM_000386
207761_s_at	4.94e-12	9.6e-14	-9.43519	20.984	-3.0327	METTL7A	methyltransferase like 7A	25840			NM_014033
209792_s_at	5.01e-12	9.77e-14	-9.43088	20.967	-3.48623	KLK10	kallikrein related peptidase 10	5655			BC002710
207002_s_at	5.21e-12	1.02e-13	-9.42079	20.9272	-2.15754	PLAGL1	PLAG1 like zinc finger 1	5325
209684_at	5.38e-12	1.05e-13	-9.41165	20.8911	-1.98877	RIN2	Ras and Rab interactor 2	54453			AL136924
212992_at	5.54e-12	1.1e-13	-9.40121	20.8499	-1.96555	AHNAK2	AHNAK nucleoprotein 2	113146			AI935123
207710_at	5.83e-12	1.16e-13	-9.38811	20.7983	-4.36681	LCE2B	late cornified envelope 2B	26239			NM_014357
203380_x_at	5.83e-12	1.16e-13	-9.38736	20.7953	-0.872733	SRSF5	serine and arginine rich splicing factor 5	6430			NM_006925
217707_x_at	6.16e-12	1.25e-13	-9.36839	20.7204	-1.33044	SMARCA2	SWI/SNF related, matrix associated, actin dependent regulator of chromatin, subfamily a, member 2	6595			AI535683
200036_s_at	6.94e-12	1.43e-13	-9.33621	20.5934	-1.20274	RPL10A	ribosomal protein L10a	4736	NA	NA	NM_007104
216199_s_at	7.05e-12	1.45e-13	-9.33174	20.5757	-1.31433	MAP3K4	mitogen-activated protein kinase kinase kinase 4	4216
205236_x_at	7.05e-12	1.46e-13	-9.33109	20.5731	-1.49919	SOD3	superoxide dismutase 3, extracellular	6649			NM_003102
209950_s_at	7.15e-12	1.48e-13	-9.3271	20.5574	-1.90153	VILL	villin like	50853			BC004300
208228_s_at	7.28e-12	1.51e-13	-9.32192	20.5369	-2.30822	FGFR2	fibroblast growth factor receptor 2	2263			M87771
209691_s_at	7.35e-12	1.53e-13	-9.31862	20.5238	-2.72816	DOK4	docking protein 4	55715			BC003541
218531_at	7.44e-12	1.56e-13	-9.31403	20.5057	-0.868114	TMEM134	transmembrane protein 134	80194			NM_025124
202289_s_at	7.71e-12	1.62e-13	-9.30395	20.4659	-2.02357	TACC2	transforming acidic coiled-coil containing protein 2	10579			NM_006997
203997_at	7.85e-12	1.67e-13	-9.2973	20.4396	-2.22294	PTPN3	protein tyrosine phosphatase, non-receptor type 3	5774			NM_002829
211105_s_at	8.32e-12	1.78e-13	-9.28115	20.3758	-1.33795	NFATC1	nuclear factor of activated T-cells 1	4772			U80918
213194_at	8.41e-12	1.8e-13	-9.27802	20.3634	-1.60506	ROBO1	roundabout guidance receptor 1	6091			BF059159
213695_at	9.54e-12	2.06e-13	-9.24462	20.2313	-2.45053	PON3	paraoxonase 3	5446			L48516
200636_s_at	9.65e-12	2.09e-13	-9.24125	20.218	-2.56538	PTPRF	protein tyrosine phosphatase, receptor type F	5792			NM_002840
203464_s_at	1.01e-11	2.2e-13	-9.22801	20.1655	-1.15056	EPN2-IT1///EPN2	EPN2 intronic transcript 1///epsin 2	100874309///22905			NM_014964
218048_at	1.04e-11	2.28e-13	-9.21946	20.1317	-0.922232	COMMD3	COMM domain containing 3	23412			NM_012071
215867_x_at	1.04e-11	2.29e-13	-9.21812	20.1264	-2.12808	CA12	carbonic anhydrase 12	771			AL050025
206642_at	1.08e-11	2.38e-13	-9.2088	20.0895	-5.44048	DSG1	desmoglein 1	1828			NM_001942
212270_x_at	1.1e-11	2.43e-13	-9.20305	20.0668	-0.786213	RPL17-C18orf32///SNORD58C///C18orf32///SNORD58A///SNORD58B///RPL17	RPL17-C18orf32 readthrough///small nucleolar RNA, C/D box 58C///chromosome 18 open reading frame 32///small nucleolar RNA, C/D box 58A///small nucleolar RNA, C/D box 58B///ribosomal protein L17	100526842///100124516///497661///26791///26790///6139			BG168283
201094_at	1.17e-11	2.6e-13	-9.18639	20.0008	-1.04122	RPS29	ribosomal protein S29	6235			NM_001032
212848_s_at	1.19e-11	2.64e-13	-9.18226	19.9844	-1.47549	C9orf3	chromosome 9 open reading frame 3	84909			BG036668
221958_s_at	1.2e-11	2.69e-13	-9.17806	19.9678	-1.30904	WLS	wntless Wnt ligand secretion mediator	79971			AA775681
221796_at	1.21e-11	2.7e-13	-9.17705	19.9638	-3.43715	NTRK2	neurotrophic receptor tyrosine kinase 2	4915			AA707199
221878_at	1.23e-11	2.75e-13	-9.17251	19.9458	-2.27358	C2orf68	chromosome 2 open reading frame 68	388969			BF110411
206580_s_at	1.26e-11	2.83e-13	-9.16538	19.9175	-1.06162	EFEMP2	EGF containing fibulin like extracellular matrix protein 2	30008			NM_016938
39249_at	1.31e-11	2.95e-13	-9.15481	19.8757	-4.02334	AQP3	aquaporin 3 (Gill blood group)	360			AB001325
211401_s_at	1.35e-11	3.05e-13	-9.14672	19.8436	-2.27728	FGFR2	fibroblast growth factor receptor 2	2263			AB030078
219388_at	1.38e-11	3.13e-13	-9.13995	19.8168	-2.08625	GRHL2	grainyhead like transcription factor 2	79977			NM_024915
208614_s_at	1.4e-11	3.2e-13	-9.13497	19.797	-1.59222	FLNB	filamin B	2317			M62994
200937_s_at	1.41e-11	3.22e-13	-9.13345	19.791	-0.842839	RPL5///SNORD21	ribosomal protein L5///small nucleolar RNA, C/D box 21	6125///6083			NM_000969
204039_at	1.45e-11	3.34e-13	-9.12395	19.7533	-2.90076	CEBPA	CCAAT/enhancer binding protein alpha	1050			NM_004364
220161_s_at	1.46e-11	3.36e-13	-9.12273	19.7485	-1.9358	EPB41L4B	erythrocyte membrane protein band 4.1 like 4B	54566			NM_019114
204765_at	1.54e-11	3.57e-13	-9.10772	19.689	-2.97209	ARHGEF5	Rho guanine nucleotide exchange factor 5	7984			NM_005435
217724_at	1.54e-11	3.58e-13	-9.10688	19.6857	-1.18346	SERBP1	SERPINE1 mRNA binding protein 1	26135			AF131807
219298_at	1.62e-11	3.8e-13	-9.09197	19.6266	-1.4532	ECHDC3	enoyl-CoA hydratase domain containing 3	79746			NM_024693
221475_s_at	1.71e-11	4.01e-13	-9.07874	19.5741	-0.954703	RPL15	ribosomal protein L15	6138			NM_002948
205286_at	1.77e-11	4.16e-13	-9.06921	19.5362	-3.64204	TFAP2C	transcription factor AP-2 gamma	7022			U85658
210619_s_at	1.8e-11	4.26e-13	-9.06342	19.5133	-2.61298	HYAL1	hyaluronoglucosaminidase 1	3373			AF173154
200038_s_at	1.84e-11	4.37e-13	-9.05712	19.4883	-0.78989	RPL17-C18orf32///SNORD58C///C18orf32///SNORD58A///SNORD58B///RPL17	RPL17-C18orf32 readthrough///small nucleolar RNA, C/D box 58C///chromosome 18 open reading frame 32///small nucleolar RNA, C/D box 58A///small nucleolar RNA, C/D box 58B///ribosomal protein L17	100526842///100124516///497661///26791///26790///6139	NA	NA	NM_000985
209160_at	1.85e-11	4.42e-13	-9.0544	19.4775	-3.83911	AKR1C3	aldo-keto reductase family 1, member C3	8644			AB018580
214164_x_at	1.86e-11	4.45e-13	-9.05251	19.47	-2.41882	CA12	carbonic anhydrase 12	771			BF752277
212148_at	1.9e-11	4.55e-13	-9.04696	19.4479	-3.11282	PBX1	PBX homeobox 1	5087			AL049381
203963_at	1.9e-11	4.59e-13	-9.04516	19.4408	-2.6269	CA12	carbonic anhydrase 12	771			NM_001218
213933_at	1.94e-11	4.69e-13	-9.03964	19.4189	-2.38091	PTGER3	prostaglandin E receptor 3	5733			AW242315
207076_s_at	2.07e-11	5.07e-13	-9.02036	19.3423	-2.72182	ASS1	argininosuccinate synthase 1	445			NM_000050
201922_at	2.1e-11	5.16e-13	-9.01586	19.3244	-0.93553	NSA2	NSA2, ribosome biogenesis homolog	10412			NM_014886
217528_at	2.17e-11	5.35e-13	-9.00715	19.2899	-5.24472	CLCA2	chloride channel accessory 2	9635			BF003134
205290_s_at	2.18e-11	5.38e-13	-9.00556	19.2835	-2.4627	BMP2	bone morphogenetic protein 2	650			NM_001200
208768_x_at	2.31e-11	5.74e-13	-8.98964	19.2203	-0.767943	RPL22	ribosomal protein L22	6146			D17652
203519_s_at	2.33e-11	5.8e-13	-8.987	19.2098	-0.799754	UPF2	UPF2 regulator of nonsense transcripts homolog (yeast)	26019			NM_015542
212301_at	2.39e-11	5.96e-13	-8.98017	19.1827	-1.0849	RTF1	RTF1 homolog, Paf1/RNA polymerase II complex component	23168			D87440
205019_s_at	2.42e-11	6.06e-13	-8.97609	19.1665	-2.42777	VIPR1	vasoactive intestinal peptide receptor 1	7433			NM_004624
203385_at	2.45e-11	6.14e-13	-8.97291	19.1538	-1.15113	DGKA	diacylglycerol kinase alpha	1606			NM_001345
209655_s_at	2.5e-11	6.32e-13	-8.9655	19.1244	-2.88105	TMEM47	transmembrane protein 47	83604			AI803181
205857_at	2.51e-11	6.35e-13	-8.96451	19.1205	-2.63304	SLC18A2	solute carrier family 18 member A2	6571			AI269290
219995_s_at	2.51e-11	6.36e-13	-8.96402	19.1185	-4.86319	ZNF750	zinc finger protein 750	79755			NM_024702
204388_s_at	2.51e-11	6.38e-13	-8.96329	19.1156	-3.2571	MAOA	monoamine oxidase A	4128			NM_000240
211518_s_at	2.51e-11	6.4e-13	-8.96249	19.1124	-2.58748	BMP4	bone morphogenetic protein 4	652			D30751
218002_s_at	2.6e-11	6.64e-13	-8.95319	19.0755	-5.05352	CXCL14	C-X-C motif chemokine ligand 14	9547			NM_004887
201591_s_at	2.67e-11	6.84e-13	-8.94604	19.047	-0.856324	NISCH	nischarin	11188			NM_007184
217874_at	2.7e-11	6.94e-13	-8.94246	19.0328	-0.736626	SUCLG1	succinate-CoA ligase alpha subunit	8802			NM_003849
211653_x_at	2.75e-11	7.07e-13	-8.93757	19.0134	-2.54124	LOC101930400///AKR1C2	aldo-keto reductase family 1 member C2-like///aldo-keto reductase family 1, member C2	101930400///1646			M33376
200099_s_at	2.75e-11	7.08e-13	-8.93744	19.0129	-0.991751	SNORD73A///RPS3A	small nucleolar RNA, C/D box 73A///ribosomal protein S3A	8944///6189
215726_s_at	2.91e-11	7.5e-13	-8.92313	18.956	-1.68974	CYB5A	cytochrome b5 type A	1528			M22976
221748_s_at	2.96e-11	7.64e-13	-8.91836	18.937	-1.63083	TNS1	tensin 1	7145			AL046979
210461_s_at	2.97e-11	7.69e-13	-8.91698	18.9315	-2.48686	ABLIM1	actin binding LIM protein 1	3983			BC002448
218312_s_at	3e-11	7.79e-13	-8.91365	18.9182	-1.1991	ZSCAN18	zinc finger and SCAN domain containing 18	65982			NM_023926
202525_at	3.03e-11	7.87e-13	-8.91115	18.9083	-2.83636	PRSS8	protease, serine 8	5652			NM_002773
201197_at	3.1e-11	8.08e-13	-8.90462	18.8823	-1.21106	AMD1	adenosylmethionine decarboxylase 1	262			NM_001634
204777_s_at	3.1e-11	8.1e-13	-8.9039	18.8795	-2.46666	MAL	mal, T-cell differentiation protein	4118			NM_002371
212593_s_at	3.17e-11	8.3e-13	-8.89803	18.8561	-1.63608	MIR4680///PDCD4	microRNA 4680///programmed cell death 4 (neoplastic transformation inhibitor)	100616113///27250			N92498
220230_s_at	3.27e-11	8.59e-13	-8.8894	18.8218	-2.57996	CYB5R2	cytochrome b5 reductase 2	51700			NM_016229
203678_at	3.34e-11	8.79e-13	-8.88372	18.7992	-1.43398	FAN1	FANCD2/FANCI-associated nuclease 1	22909			NM_014967
222383_s_at	3.4e-11	8.97e-13	-8.87868	18.7791	-3.5699	ALOXE3	arachidonate lipoxygenase 3	59344
213650_at	3.43e-11	9.06e-13	-8.87632	18.7697	-1.36081	LOC101930583///GOLGA8B///GOLGA8A	uncharacterized LOC101930583///golgin A8 family member B///golgin A8 family member A	101930583///440270///23015
200026_at	3.45e-11	9.15e-13	-8.87389	18.7601	-1.05662	RPL34	ribosomal protein L34	6164	NA	NA	NM_000995
205613_at	3.55e-11	9.43e-13	-8.86616	18.7293	-1.8481	SYT17	synaptotagmin 17	51760			NM_016524
210676_x_at	3.61e-11	9.61e-13	-8.86159	18.7111	-0.895246	RGPD6///RGPD8///RGPD3///RGPD4///RGPD5	RANBP2-like and GRIP domain containing 6///RANBP2-like and GRIP domain containing 8///RANBP2-like and GRIP domain containing 3///RANBP2-like and GRIP domain containing 4///RANBP2-like and GRIP domain containing 5	729540///727851///653489///285190///84220			U64675
208161_s_at	3.61e-11	9.64e-13	-8.86076	18.7078	-2.68035	ABCC3	ATP binding cassette subfamily C member 3	8714
206177_s_at	3.68e-11	9.86e-13	-8.85522	18.6858	-2.59215	ARG1	arginase 1	383			NM_000045
209366_x_at	3.78e-11	1.02e-12	-8.84801	18.6571	-1.71924	CYB5A	cytochrome b5 type A	1528			M22865
214247_s_at	3.83e-11	1.03e-12	-8.84349	18.6391	-2.12933	DKK3	dickkopf WNT signaling pathway inhibitor 3	27122			AU148057
202071_at	4.09e-11	1.11e-12	-8.82558	18.5678	-1.27991	SDC4	syndecan 4	6385			NM_002999
219054_at	4.18e-11	1.14e-12	-8.81901	18.5416	-2.34149	NPR3	natriuretic peptide receptor 3	4883
35666_at	4.18e-11	1.15e-12	-8.81817	18.5383	-1.41132	SEMA3F	semaphorin 3F	6405			U38276
209047_at	4.19e-11	1.15e-12	-8.8174	18.5352	-2.55339	AQP1	aquaporin 1 (Colton blood group)	358			AL518391
209260_at	4.19e-11	1.15e-12	-8.81689	18.5331	-6.06391	SFN	stratifin	2810			BC000329
203178_at	4.19e-11	1.15e-12	-8.81666	18.5322	-1.95115	GATM	glycine amidinotransferase	2628			NM_001482
203476_at	4.36e-11	1.2e-12	-8.80576	18.4888	-1.83548	TPBG	trophoblast glycoprotein	7162			NM_006670
210059_s_at	4.43e-11	1.23e-12	-8.80121	18.4707	-2.34801	MAPK13	mitogen-activated protein kinase 13	5603			BC000433
205623_at	4.75e-11	1.33e-12	-8.78135	18.3916	-2.9857	ALDH3A1	aldehyde dehydrogenase 3 family member A1	218			NM_000691
200017_at	4.88e-11	1.37e-12	-8.77431	18.3635	-1.2988	RPS27A	ribosomal protein S27a	6233	NA	NA	NM_002954
211282_x_at	4.93e-11	1.38e-12	-8.77148	18.3523	-3.07061	TNFRSF25	TNF receptor superfamily member 25	8718			U94506
205832_at	4.95e-11	1.39e-12	-8.77029	18.3475	-1.25008	CPA4	carboxypeptidase A4	51200			NM_016352
200717_x_at	5.14e-11	1.45e-12	-8.75972	18.3054	-0.789957	RPL7	ribosomal protein L7	6129			NM_000971
205455_at	5.36e-11	1.52e-12	-8.74806	18.2589	-1.72506	MST1R	macrophage stimulating 1 receptor	4486			NM_002447
204135_at	5.41e-11	1.54e-12	-8.7451	18.2471	-1.69002	FILIP1L	filamin A interacting protein 1 like	11259			NM_014890
220225_at	5.48e-11	1.56e-12	-8.74177	18.2339	-2.98285	IRX4	iroquois homeobox 4	50805			NM_016358
220724_at	5.61e-11	1.6e-12	-8.73472	18.2057	-4.15544	CWH43	cell wall biogenesis 43 C-terminal homolog	80157			NM_025087
207381_at	5.61e-11	1.6e-12	-8.73465	18.2055	-4.19893	ALOX12B	arachidonate 12-lipoxygenase, 12R type	242			NM_001139
213506_at	5.66e-11	1.62e-12	-8.73238	18.1964	-3.13241	F2RL1	F2R like trypsin receptor 1	2150			BE965369
200013_at	5.94e-11	1.7e-12	-8.71963	18.1456	-0.738435	RPL24	ribosomal protein L24	6152	NA	NA	NM_000986
213110_s_at	6.26e-11	1.82e-12	-8.70334	18.0806	-3.03561	COL4A5	collagen type IV alpha 5 chain	1287			AW052179
210020_x_at	6.26e-11	1.82e-12	-8.70315	18.0799	-3.54349	CALML3	calmodulin like 3	810			M58026
217740_x_at	6.26e-11	1.82e-12	-8.7031	18.0797	-0.864897	SNORD24///SNORD36A///SNORD36B///RPL7A	small nucleolar RNA, C/D box 24///small nucleolar RNA, C/D box 36A///small nucleolar RNA, C/D box 36B///ribosomal protein L7a	26820///26815///26814///6130			NM_000972
212850_s_at	6.27e-11	1.83e-12	-8.70245	18.0771	-2.32157	LRP4	LDL receptor related protein 4	4038			AA584297
218644_at	6.46e-11	1.89e-12	-8.69352	18.0415	-2.54585	PLEK2	pleckstrin 2	26499			NM_016445
219090_at	6.5e-11	1.91e-12	-8.69129	18.0326	-2.37276	SLC24A3	solute carrier family 24 member 3	57419			NM_020689
219756_s_at	6.52e-11	1.92e-12	-8.69013	18.028	-2.89293	POF1B	premature ovarian failure, 1B	79983			NM_024921
210128_s_at	6.55e-11	1.93e-12	-8.68884	18.0228	-2.26883	LTB4R	leukotriene B4 receptor	1241			U41070
202565_s_at	6.7e-11	1.98e-12	-8.68202	17.9956	-1.74119	SVIL	supervillin	6840			NM_003174
220723_s_at	6.88e-11	2.04e-12	-8.67512	17.9681	-3.09801	CWH43	cell wall biogenesis 43 C-terminal homolog	80157			NM_025087
201287_s_at	7.25e-11	2.16e-12	-8.66156	17.914	-2.44052	SDC1	syndecan 1	6382			NM_002997
203687_at	7.59e-11	2.26e-12	-8.64972	17.8667	-2.4138	CX3CL1	C-X3-C motif chemokine ligand 1	6376			NM_002996
31846_at	7.86e-11	2.34e-12	-8.64089	17.8315	-1.30855	RHOD	ras homolog family member D	29984
213820_s_at	7.87e-11	2.36e-12	-8.63971	17.8268	-2.03635	STARD5	StAR related lipid transfer domain containing 5	80765			T54159
204268_at	7.88e-11	2.36e-12	-8.63897	17.8238	-4.78396	S100A2	S100 calcium binding protein A2	6273			NM_005978
204204_at	8e-11	2.4e-12	-8.63502	17.8081	-1.8533	SLC31A2	solute carrier family 31 member 2	1318			NM_001860
204636_at	8.18e-11	2.46e-12	-8.62888	17.7836	-4.29954	COL17A1	collagen type XVII alpha 1 chain	1308			NM_000494
200811_at	8.43e-11	2.54e-12	-8.62062	17.7506	-0.952506	CIRBP	cold inducible RNA binding protein	1153			NM_001280
212771_at	8.57e-11	2.59e-12	-8.61578	17.7313	-1.31548	FAM171A1	family with sequence similarity 171 member A1	221061			AU150943
205440_s_at	8.94e-11	2.71e-12	-8.60483	17.6876	-3.17268	NPY1R	neuropeptide Y receptor Y1	4886			NM_000909
209699_x_at	9.47e-11	2.89e-12	-8.58908	17.6247	-2.38724	LOC101930400///AKR1C2	aldo-keto reductase family 1 member C2-like///aldo-keto reductase family 1, member C2	101930400///1646			U05598
206043_s_at	9.95e-11	3.05e-12	-8.57625	17.5735	-2.60749	ATP2C2	ATPase secretory pathway Ca2+ transporting 2	9914			NM_014861
202990_at	1e-10	3.07e-12	-8.57402	17.5645	-2.36374	PYGL	phosphorylase, glycogen, liver	5836			NM_002863
202623_at	1e-10	3.08e-12	-8.57335	17.5619	-0.944447	EAPP	E2F associated phosphoprotein	55837			NM_018453
200897_s_at	1.02e-10	3.15e-12	-8.5681	17.5409	-2.77263	PALLD	palladin, cytoskeletal associated protein	23022			NM_016081
201160_s_at	1.09e-10	3.39e-12	-8.5501	17.469	-1.03189	YBX3	Y-box binding protein 3	8531			AL556190
206192_at	1.11e-10	3.46e-12	-8.54484	17.448	-4.61504	CDSN	corneodesmosin	1041			L20815
211596_s_at	1.12e-10	3.48e-12	-8.54301	17.4407	-3.08377	LRIG1	leucine rich repeats and immunoglobulin like domains 1	26018			AB050468
206542_s_at	1.12e-10	3.5e-12	-8.54183	17.436	-1.35225	SMARCA2	SWI/SNF related, matrix associated, actin dependent regulator of chromatin, subfamily a, member 2	6595			AV725365
216594_x_at	1.15e-10	3.62e-12	-8.53334	17.4021	-1.97105	AKR1C1	aldo-keto reductase family 1 member C1	1645			S68290
203556_at	1.19e-10	3.75e-12	-8.52475	17.3677	-0.983068	ZHX2	zinc fingers and homeoboxes 2	22882			NM_014943
202457_s_at	1.2e-10	3.8e-12	-8.5219	17.3563	-1.36742	PPP3CA	protein phosphatase 3 catalytic subunit alpha	5530			AA911231
219411_at	1.2e-10	3.8e-12	-8.52189	17.3563	-2.78857	ELMO3	engulfment and cell motility 3	79767			NM_024712
218237_s_at	1.2e-10	3.81e-12	-8.52093	17.3525	-2.91879	SLC38A1	solute carrier family 38 member 1	81539			NM_030674
210397_at	1.24e-10	3.96e-12	-8.51155	17.315	-3.10859	DEFB1	defensin beta 1	1672			U73945
213924_at	1.24e-10	3.96e-12	-8.51116	17.3134	-2.12417	GNAL	G protein subunit alpha L	2774			BF476502
204019_s_at	1.24e-10	3.98e-12	-8.51034	17.3102	-1.25243	SH3YL1	SH3 and SYLF domain containing 1	26751			NM_015677
213848_at	1.25e-10	3.99e-12	-8.50975	17.3078	-1.29256	DUSP7	dual specificity phosphatase 7	1849			AI655015
201924_at	1.25e-10	4.02e-12	-8.50775	17.2998	-1.03569	AFF1	AF4/FMR2 family member 1	4299			NM_005935
206605_at	1.29e-10	4.17e-12	-8.49886	17.2643	-2.57591	ENDOU	endonuclease, poly(U) specific	8909			NM_006025
203327_at	1.31e-10	4.21e-12	-8.4965	17.2549	-1.43369	IDE	insulin degrading enzyme	3416			N22903
212036_s_at	1.35e-10	4.36e-12	-8.48739	17.2185	-1.02665	PNN	pinin, desmosome associated protein	5411
221775_x_at	1.41e-10	4.55e-12	-8.47708	17.1773	-0.771304	RPL22	ribosomal protein L22	6146
203037_s_at	1.41e-10	4.58e-12	-8.47573	17.1718	-1.52152	MTSS1	metastasis suppressor 1	9788			NM_014751
221979_at	1.44e-10	4.69e-12	-8.46946	17.1468	-1.9325	TOPORS-AS1	TOPORS antisense RNA 1	100129250			AI150117
40472_at	1.44e-10	4.72e-12	-8.46808	17.1413	-2.35092	LPCAT4	lysophosphatidylcholine acyltransferase 4	254531			AF007155
200715_x_at	1.49e-10	4.87e-12	-8.46046	17.1108	-0.752119	SNORD32A///SNORD33///SNORD34///SNORD35A///RPL13A	small nucleolar RNA, C/D box 32A///small nucleolar RNA, C/D box 33///small nucleolar RNA, C/D box 34///small nucleolar RNA, C/D box 35A///ribosomal protein L13a	26819///26818///26817///26816///23521			BC000514
201015_s_at	1.56e-10	5.11e-12	-8.44834	17.0623	-3.49046	JUP	junction plakoglobin	3728			NM_021991
221016_s_at	1.65e-10	5.47e-12	-8.43191	16.9967	-0.856299	TCF7L1	transcription factor 7 like 1	83439			NM_031283
202317_s_at	1.66e-10	5.49e-12	-8.43089	16.9926	-0.753112	UBE4B	ubiquitination factor E4B	10277			NM_006048
209708_at	1.68e-10	5.58e-12	-8.42662	16.9755	-1.77143	MOXD1	monooxygenase DBH like 1	26002			AY007239
207206_s_at	1.72e-10	5.72e-12	-8.42086	16.9525	-2.5154	ALOX12	arachidonate 12-lipoxygenase, 12S type	239			NM_000697
204537_s_at	1.82e-10	6.1e-12	-8.40485	16.8884	-2.58869	MIR452///MIR224///GABRE	microRNA 452///microRNA 224///gamma-aminobutyric acid type A receptor epsilon subunit	574412///407009///2564			NM_004961
205006_s_at	1.82e-10	6.13e-12	-8.40369	16.8838	-1.05583	NMT2	N-myristoyltransferase 2	9397			NM_004808
216918_s_at	1.83e-10	6.15e-12	-8.40278	16.8802	-3.28455	DST	dystonin	667
218804_at	1.83e-10	6.17e-12	-8.40181	16.8763	-2.38039	ANO1	anoctamin 1	55107			NM_018043
219670_at	1.86e-10	6.31e-12	-8.39655	16.8552	-1.44903	BEND5	BEN domain containing 5	79656			NM_024603
201906_s_at	1.87e-10	6.35e-12	-8.39475	16.848	-1.16909	CTDSPL	CTD small phosphatase like	10217			NM_005808
206421_s_at	1.87e-10	6.36e-12	-8.39458	16.8474	-4.08976	SERPINB7	serpin family B member 7	8710			NM_003784
217744_s_at	1.9e-10	6.48e-12	-8.38977	16.8281	-3.19722	PERP	PERP, TP53 apoptosis effector	64065			NM_022121
209306_s_at	1.92e-10	6.54e-12	-8.38763	16.8196	-1.42939	SWAP70	SWAP switching B-cell complex 70kDa subunit	23075			AI139569
202085_at	1.92e-10	6.58e-12	-8.38606	16.8133	-3.53156	TJP2	tight junction protein 2	9414			NM_004817
208999_at	1.93e-10	6.6e-12	-8.38531	16.8103	-0.812561	SEPT8	septin 8	23176			D86957
212113_at	1.93e-10	6.62e-12	-8.3847	16.8078	-2.23379	ATXN7L3B	ataxin 7 like 3B	552889			AI927479
214924_s_at	2.01e-10	6.91e-12	-8.37401	16.7651	-0.950848	TRAK1	trafficking kinesin protein 1	22906
202575_at	2.06e-10	7.11e-12	-8.36687	16.7365	-2.6609	CRABP2	cellular retinoic acid binding protein 2	1382			NM_001878
211043_s_at	2.07e-10	7.16e-12	-8.3653	16.7302	-1.60533	CLTB	clathrin light chain B	1212			BC006332
219305_x_at	2.15e-10	7.45e-12	-8.35545	16.6908	-1.1435	FBXO2	F-box protein 2	26232			NM_012168
200018_at	2.19e-10	7.61e-12	-8.35021	16.6699	-0.73743	LOC100508408///SNORD14B///RPS13	uncharacterized LOC100508408///small nucleolar RNA, C/D box 14B///ribosomal protein S13	100508408///85388///6207	NA	NA	NM_001017
201969_at	2.2e-10	7.65e-12	-8.34912	16.6655	-0.977782	NASP	nuclear autoantigenic sperm protein	4678			AW003362
221610_s_at	2.28e-10	7.94e-12	-8.33974	16.628	-1.14393	STAP2	signal transducing adaptor family member 2	55620			BC000795
219377_at	2.31e-10	8.07e-12	-8.33594	16.6128	-1.84562	GAREM1	GRB2 associated regulator of MAPK1 subtype 1	64762			NM_022751
201592_at	2.39e-10	8.36e-12	-8.32721	16.5779	-0.723582	EIF3H	eukaryotic translation initiation factor 3 subunit H	8667			NM_003756
200963_x_at	2.42e-10	8.51e-12	-8.32281	16.5602	-0.799164	RPL31	ribosomal protein L31	6160			NM_000993
203571_s_at	2.45e-10	8.63e-12	-8.31935	16.5464	-3.17343	ADIRF	adipogenesis regulatory factor	10974			NM_006829
219489_s_at	2.5e-10	8.81e-12	-8.31409	16.5253	-1.70278	NXN	nucleoredoxin	64359			NM_017821
209442_x_at	2.58e-10	9.15e-12	-8.30483	16.4883	-1.71833	ANK3	ankyrin 3, node of Ranvier (ankyrin G)	288			AL136710
204332_s_at	2.62e-10	9.33e-12	-8.30003	16.4691	-1.07253	AGA	aspartylglucosaminidase	175			M64073
209392_at	2.63e-10	9.38e-12	-8.29887	16.4644	-2.96136	ENPP2	ectonucleotide pyrophosphatase/phosphodiesterase 2	5168			L35594
200920_s_at	2.72e-10	9.7e-12	-8.29045	16.4307	-1.50308	BTG1	BTG anti-proliferation factor 1	694			AL535380
214058_at	2.74e-10	9.78e-12	-8.28855	16.4231	-2.08429	MYCL	v-myc avian myelocytomatosis viral oncogene lung carcinoma derived homolog	4610			M19720
220966_x_at	2.78e-10	9.98e-12	-8.28345	16.4027	-0.891982	ARPC5L	actin related protein 2/3 complex subunit 5 like	81873			NM_030978
219517_at	2.84e-10	1.02e-11	-8.27758	16.3792	-1.76057	ELL3	elongation factor for RNA polymerase II 3	80237			NM_025165
201492_s_at	2.85e-10	1.03e-11	-8.27605	16.3731	-0.855007	RPL41	ribosomal protein L41	6171			NM_021104
201842_s_at	2.91e-10	1.06e-11	-8.26926	16.3459	-2.79444	EFEMP1	EGF containing fibulin like extracellular matrix protein 1	2202
210058_at	3.05e-10	1.11e-11	-8.25675	16.2958	-1.60066	MAPK13	mitogen-activated protein kinase 13	5603			BC000433
204418_x_at	3.05e-10	1.12e-11	-8.2558	16.292	-1.22082	GSTM2	glutathione S-transferase mu 2 (muscle)	2946			NM_000848
201368_at	3.07e-10	1.12e-11	-8.25435	16.2862	-1.15895	ZFP36L2	ZFP36 ring finger protein like 2	678			U07802
212838_at	3.1e-10	1.14e-11	-8.25137	16.2743	-0.871322	DNMBP	dynamin binding protein	23268			AB023227
200637_s_at	3.17e-10	1.16e-11	-8.24571	16.2516	-2.81233	PTPRF	protein tyrosine phosphatase, receptor type F	5792
211383_s_at	3.4e-10	1.26e-11	-8.22578	16.1718	-0.902624	WDR37	WD repeat domain 37	22884			AL136827
222348_at	3.43e-10	1.28e-11	-8.22307	16.161	-2.65726	MAST4	microtubule associated serine/threonine kinase family member 4	375449			AW971134
203787_at	3.44e-10	1.28e-11	-8.22218	16.1574	-1.71245	SSBP2	single stranded DNA binding protein 2	23635			NM_012446
219343_at	3.44e-10	1.28e-11	-8.22162	16.1552	-1.0823	CDC37L1	cell division cycle 37 like 1	55664			NM_017913
204136_at	3.51e-10	1.31e-11	-8.21581	16.1319	-2.15952	COL7A1	collagen type VII alpha 1 chain	1294			NM_000094
213359_at	3.57e-10	1.34e-11	-8.21108	16.113	-1.38632	HNRNPD	heterogeneous nuclear ribonucleoprotein D	3184
202942_at	3.57e-10	1.34e-11	-8.21056	16.1109	-0.910592	ETFB	electron transfer flavoprotein beta subunit	2109			NM_001985
220291_at	3.64e-10	1.37e-11	-8.20557	16.0909	-1.92719	GDPD2	glycerophosphodiester phosphodiesterase domain containing 2	54857			NM_017711
213929_at	3.64e-10	1.37e-11	-8.20508	16.0889	-1.67305	EXPH5	exophilin 5	23086			AL050204
200081_s_at	3.71e-10	1.41e-11	-8.19919	16.0654	-0.841468	RPS6	ribosomal protein S6	6194			BE741754
217807_s_at	3.72e-10	1.41e-11	-8.19817	16.0613	-1.00577	SNORD23///GLTSCR2	small nucleolar RNA, C/D box 23///glioma tumor suppressor candidate region gene 2	692091///29997			NM_015710
209873_s_at	3.78e-10	1.44e-11	-8.19362	16.0431	-2.63954	PKP3	plakophilin 3	11187			AF053719
219369_s_at	3.79e-10	1.45e-11	-8.19191	16.0362	-2.1997	OTUB2	OTU deubiquitinase, ubiquitin aldehyde binding 2	78990			NM_023112
206315_at	3.88e-10	1.48e-11	-8.18572	16.0114	-2.44909	CRLF1	cytokine receptor like factor 1	9244			NM_004750
213737_x_at	3.89e-10	1.49e-11	-8.18494	16.0083	-1.67945	GOLGA8N	golgin A8 family member N	643699			AI620911
203430_at	3.93e-10	1.51e-11	-8.18158	15.9948	-1.35405	HEBP2	heme binding protein 2	23593			NM_014320
218182_s_at	4.08e-10	1.57e-11	-8.17204	15.9566	-2.9779	CLDN1	claudin 1	9076			NM_021101
205384_at	4.08e-10	1.57e-11	-8.17196	15.9563	-1.6069	FXYD1	FXYD domain containing ion transport regulator 1	5348			NM_005031
210880_s_at	4.18e-10	1.62e-11	-8.16488	15.928	-2.68124	EFS	embryonal Fyn-associated substrate	10278			AB001467
212724_at	4.23e-10	1.64e-11	-8.16186	15.9158	-1.40784	RND3	Rho family GTPase 3	390			BG054844
203287_at	4.24e-10	1.64e-11	-8.16069	15.9112	-2.75128	LAD1	ladinin 1	3898			NM_005558
214536_at	4.26e-10	1.65e-11	-8.15947	15.9063	-2.87761	SLURP1	secreted LY6/PLAUR domain containing 1	57152			NM_020427
222242_s_at	4.31e-10	1.68e-11	-8.15578	15.8915	-2.5746	KLK5	kallikrein related peptidase 5	25818
220620_at	4.31e-10	1.68e-11	-8.15523	15.8893	-3.99671	CRCT1	cysteine rich C-terminal 1	54544			NM_019060
203910_at	4.43e-10	1.73e-11	-8.14859	15.8627	-1.41914	ARHGAP29	Rho GTPase activating protein 29	9411			NM_004815
219498_s_at	4.63e-10	1.82e-11	-8.13596	15.8121	-2.65016	BCL11A	B-cell CLL/lymphoma 11A	53335			NM_018014
201328_at	4.63e-10	1.82e-11	-8.13596	15.8121	-1.90532	ETS2	ETS proto-oncogene 2, transcription factor	2114			AL575509
219423_x_at	4.75e-10	1.87e-11	-8.12822	15.7811	-3.20685	TNFRSF25	TNF receptor superfamily member 25	8718			NM_003790
204345_at	4.9e-10	1.95e-11	-8.11884	15.7435	-1.35674	COL16A1	collagen type XVI alpha 1 chain	1307			NM_001856
203855_at	4.92e-10	1.96e-11	-8.1177	15.739	-1.02086	WDR47	WD repeat domain 47	22911			NM_014969
213511_s_at	4.97e-10	1.98e-11	-8.11469	15.7269	-0.965133	MTMR1	myotubularin related protein 1	8776			AI167164
212690_at	4.99e-10	1.99e-11	-8.1137	15.7229	-0.997039	DDHD2	DDHD domain containing 2	23259			AB018268
202656_s_at	5.03e-10	2.01e-11	-8.11127	15.7132	-1.03994	SERTAD2	SERTA domain containing 2	9792			BG107456
57588_at	5.05e-10	2.02e-11	-8.10975	15.7071	-2.04952	SLC24A3	solute carrier family 24 member 3	57419			R62432
208791_at	5.26e-10	2.11e-11	-8.09901	15.6641	-4.00434	CLU	clusterin	1191			M25915
201200_at	5.26e-10	2.11e-11	-8.09877	15.6631	-1.45114	CREG1	cellular repressor of E1A stimulated genes 1	8804			NM_003851
209311_at	5.28e-10	2.13e-11	-8.09716	15.6567	-0.958113	BCL2L2	BCL2 like 2	599			D87461
207109_at	5.46e-10	2.2e-11	-8.0885	15.622	-3.51879	POU2F3	POU class 2 homeobox 3	25833			NM_014352
209002_s_at	5.48e-10	2.21e-11	-8.08762	15.6184	-1.0198	CALCOCO1	calcium binding and coiled-coil domain 1	57658			BC003177
213701_at	5.5e-10	2.22e-11	-8.08633	15.6133	-1.33274	C12orf29	chromosome 12 open reading frame 29	91298			AW299245
202889_x_at	5.59e-10	2.26e-11	-8.08175	15.5949	-2.32581	MAP7	microtubule associated protein 7	9053			T62571
221795_at	5.63e-10	2.29e-11	-8.07917	15.5846	-2.82322	NTRK2	neurotrophic receptor tyrosine kinase 2	4915			AI346341
213106_at	5.7e-10	2.32e-11	-8.07591	15.5716	-2.45995	ATP8A1	ATPase phospholipid transporting 8A1	10396			AI769688
204678_s_at	5.79e-10	2.36e-11	-8.07159	15.5542	-2.03779	KCNK1	potassium two pore domain channel subfamily K member 1	3775			U90065
219915_s_at	5.99e-10	2.44e-11	-8.06296	15.5197	-2.19419	SLC16A10	solute carrier family 16 member 10	117247			NM_018593
205200_at	6.08e-10	2.48e-11	-8.05893	15.5035	-3.184	EXOSC7///CLEC3B	exosome component 7///C-type lectin domain family 3 member B	23016///7123			NM_003278
212096_s_at	6.13e-10	2.51e-11	-8.05638	15.4933	-1.08752	MTUS1	microtubule associated tumor suppressor 1	57509			AL096842
206068_s_at	6.18e-10	2.53e-11	-8.05412	15.4843	-2.41316	ACADL	acyl-CoA dehydrogenase, long chain	33
209211_at	6.42e-10	2.63e-11	-8.04453	15.4458	-2.44016	KLF5	Kruppel like factor 5	688			AF132818
208156_x_at	6.89e-10	2.86e-11	-8.02436	15.365	-1.95837	EPPK1	epiplakin 1	83481			NM_031308
212761_at	6.89e-10	2.86e-11	-8.02395	15.3634	-1.05361	TCF7L2	transcription factor 7 like 2	6934			AI949687
217521_at	6.93e-10	2.89e-11	-8.02199	15.3555	-2.10916	HAL	histidine ammonia-lyase	3034			N54942
200816_s_at	6.93e-10	2.89e-11	-8.02197	15.3554	-0.878473	PAFAH1B1	platelet activating factor acetylhydrolase 1b regulatory subunit 1	5048			NM_000430
201798_s_at	7.17e-10	2.99e-11	-8.01307	15.3198	-1.50047	MYOF	myoferlin	26509			NM_013451
204359_at	7.28e-10	3.05e-11	-8.0089	15.3031	-1.59759	LOC100506718///FLRT2	uncharacterized LOC100506718///fibronectin leucine rich transmembrane protein 2	100506718///23768			NM_013231
204231_s_at	7.28e-10	3.05e-11	-8.00852	15.3015	-1.58262	FAAH	fatty acid amide hydrolase	2166			NM_001441
204393_s_at	7.37e-10	3.09e-11	-8.00502	15.2875	-2.64747	ACPP	acid phosphatase, prostate	55			NM_001099
221455_s_at	7.46e-10	3.14e-11	-8.00154	15.2736	-2.58429	LOC101929777///WNT3	uncharacterized LOC101929777///Wnt family member 3	101929777///7473			NM_030753
206363_at	7.58e-10	3.2e-11	-7.99685	15.2548	-2.16562	MAF	MAF bZIP transcription factor	4094			NM_005360
218997_at	7.73e-10	3.27e-11	-7.99139	15.2329	-0.729797	POLR1E	RNA polymerase I subunit E	64425			NM_022490
215129_at	8.02e-10	3.39e-11	-7.98227	15.1964	-2.35602	PIK3C2G	phosphatidylinositol-4-phosphate 3-kinase catalytic subunit type 2 gamma	5288			AJ000008
210425_x_at	8.09e-10	3.44e-11	-7.97916	15.1839	-1.7327	LOC101930583///GOLGA8B///GOLGA8A	uncharacterized LOC101930583///golgin A8 family member B///golgin A8 family member A	101930583///440270///23015			AF164622
221667_s_at	8.19e-10	3.49e-11	-7.97571	15.1701	-2.83958	HSPB8	heat shock protein family B (small) member 8	26353			AF133207
221215_s_at	8.19e-10	3.49e-11	-7.97531	15.1684	-3.20673	RIPK4	receptor interacting serine/threonine kinase 4	54101			NM_020639
202936_s_at	8.19e-10	3.5e-11	-7.9749	15.1668	-2.31701	SOX9	SRY-box 9	6662			NM_000346
218170_at	8.31e-10	3.56e-11	-7.9708	15.1504	-1.88219	ISOC1	isochorismatase domain containing 1	51015			NM_016048
203445_s_at	8.32e-10	3.56e-11	-7.97034	15.1486	-0.727097	CTDSP2	CTD small phosphatase 2	10106			NM_005730
209134_s_at	8.47e-10	3.63e-11	-7.96546	15.129	-0.672971	RPS6	ribosomal protein S6	6194			BC000524
205442_at	8.61e-10	3.7e-11	-7.96095	15.1109	-1.72711	MFAP3L	microfibrillar associated protein 3 like	9848			NM_021647
205403_at	8.61e-10	3.7e-11	-7.9608	15.1103	-3.37386	IL1R2	interleukin 1 receptor type 2	7850			NM_004633
219450_at	8.62e-10	3.71e-11	-7.96046	15.109	-1.51663	C4orf19	chromosome 4 open reading frame 19	55286			NM_018302
213005_s_at	8.84e-10	3.82e-11	-7.95341	15.0807	-1.01472	KANK1	KN motif and ankyrin repeat domains 1	23189			D79994
204457_s_at	8.85e-10	3.82e-11	-7.95288	15.0786	-1.32807	GAS1	growth arrest specific 1	2619			NM_002048
221310_at	9.03e-10	3.91e-11	-7.94718	15.0557	-2.59112	FGF14	fibroblast growth factor 14	2259			NM_004115
40093_at	9.14e-10	3.97e-11	-7.94387	15.0425	-1.72407	BCAM	basal cell adhesion molecule (Lutheran blood group)	4059			X83425
208903_at	9.16e-10	3.98e-11	-7.94282	15.0382	-0.889368	RPS28	ribosomal protein S28	6234			BF431363
202746_at	9.16e-10	3.99e-11	-7.9424	15.0366	-2.21512	ITM2A	integral membrane protein 2A	9452
213421_x_at	9.21e-10	4.02e-11	-7.9408	15.0301	-1.69141	PRSS3	protease, serine 3	5646
220066_at	9.21e-10	4.02e-11	-7.94061	15.0294	-3.05298	NOD2	nucleotide binding oligomerization domain containing 2	64127			NM_022162
213850_s_at	9.34e-10	4.09e-11	-7.93665	15.0135	-1.05199	SCAF11	SR-related CTD associated factor 11	9169
219232_s_at	9.61e-10	4.22e-11	-7.92882	14.9822	-1.51472	EGLN3	egl-9 family hypoxia inducible factor 3	112399			NM_022073
204781_s_at	9.67e-10	4.25e-11	-7.92692	14.9745	-0.947732	FAS	Fas cell surface death receptor	355			NM_000043
65517_at	9.84e-10	4.33e-11	-7.92239	14.9564	-2.05958	AP1M2	adaptor related protein complex 1 mu 2 subunit	10053
200042_at	9.94e-10	4.38e-11	-7.91972	14.9457	-0.668974	RTCB	RNA 2',3'-cyclic phosphate and 5'-OH ligase	51493	NA	NA	NM_014306
206158_s_at	1.01e-09	4.44e-11	-7.91607	14.9311	-0.707051	CNBP	CCHC-type zinc finger nucleic acid binding protein	7555			NM_003418
212328_at	1.02e-09	4.52e-11	-7.91188	14.9143	-2.40236	LIMCH1	LIM and calponin homology domains 1	22998			AB029025
222236_s_at	1.03e-09	4.56e-11	-7.90986	14.9062	-2.46869	ASAP3	ArfGAP with SH3 domain, ankyrin repeat and PH domain 3	55616			AK000253
201685_s_at	1.05e-09	4.64e-11	-7.90522	14.8876	-0.915091	TOX4	TOX high mobility group box family member 4	9878			NM_014828
206170_at	1.06e-09	4.73e-11	-7.90043	14.8684	-1.8286	ADRB2	adrenoceptor beta 2	154			NM_000024
203639_s_at	1.06e-09	4.74e-11	-7.90024	14.8676	-2.51568	FGFR2	fibroblast growth factor receptor 2	2263			M80634
823_at	1.06e-09	4.74e-11	-7.90009	14.867	-1.29117	CX3CL1	C-X3-C motif chemokine ligand 1	6376			U84487
202551_s_at	1.07e-09	4.75e-11	-7.89935	14.8641	-2.0516	LOC101929500///CRIM1	uncharacterized LOC101929500///cysteine rich transmembrane BMP regulator 1	101929500///51232			BG546884
205259_at	1.07e-09	4.79e-11	-7.89729	14.8558	-1.94591	NR3C2	nuclear receptor subfamily 3 group C member 2	4306			NM_000901
204731_at	1.09e-09	4.89e-11	-7.89266	14.8372	-0.886363	TGFBR3	transforming growth factor beta receptor 3	7049			NM_003243
214107_x_at	1.12e-09	5.01e-11	-7.88643	14.8123	-1.07287	LOC440434	aminopeptidase puromycin sensitive pseudogene	440434
205765_at	1.14e-09	5.13e-11	-7.88057	14.7888	-2.78145	CYP3A5	cytochrome P450 family 3 subfamily A member 5	1577			NM_000777
210372_s_at	1.19e-09	5.37e-11	-7.86942	14.7441	-2.46332	TPD52L1	tumor protein D52-like 1	7164			AF208012
201563_at	1.21e-09	5.47e-11	-7.86507	14.7267	-1.58736	SORD	sorbitol dehydrogenase	6652			L29008
205382_s_at	1.23e-09	5.55e-11	-7.86116	14.711	-3.59967	CFD	complement factor D	1675			NM_001928
218150_at	1.27e-09	5.78e-11	-7.85147	14.6722	-0.906023	LOC101929356///ARL5A	uncharacterized LOC101929356///ADP ribosylation factor like GTPase 5A	101929356///26225			NM_012097
201613_s_at	1.27e-09	5.78e-11	-7.85127	14.6714	-1.31756	AP1G2	adaptor related protein complex 1 gamma 2 subunit	8906			BC000519
220263_at	1.29e-09	5.9e-11	-7.8461	14.6507	-1.29673	SMAD5-AS1	SMAD5 antisense RNA 1	9597
206747_at	1.29e-09	5.9e-11	-7.84606	14.6505	-1.08959	GPRIN2	G protein regulated inducer of neurite outgrowth 2	9721			NM_014696
209590_at	1.3e-09	5.95e-11	-7.84417	14.6429	-1.80053	BMP7	bone morphogenetic protein 7	655
200673_at	1.32e-09	6.03e-11	-7.84107	14.6305	-0.662448	LAPTM4A	lysosomal protein transmembrane 4 alpha	9741			NM_014713
215471_s_at	1.41e-09	6.46e-11	-7.82406	14.5623	-2.33647	MAP7	microtubule associated protein 7	9053			AJ242502
202657_s_at	1.42e-09	6.51e-11	-7.82189	14.5536	-1.23518	SERTAD2	SERTA domain containing 2	9792			NM_014755
216037_x_at	1.45e-09	6.66e-11	-7.81652	14.5321	-0.751566	TCF7L2	transcription factor 7 like 2	6934			AA664011
202646_s_at	1.47e-09	6.78e-11	-7.812	14.514	-0.671629	CSDE1	cold shock domain containing E1	7812			AA167775
212294_at	1.47e-09	6.78e-11	-7.81195	14.5138	-0.763217	GNG12	G protein subunit gamma 12	55970			BG111761
209348_s_at	1.49e-09	6.91e-11	-7.80737	14.4955	-1.43745	MAF	MAF bZIP transcription factor	4094			AF055376
221747_at	1.5e-09	6.95e-11	-7.80595	14.4898	-1.57155	TNS1	tensin 1	7145			AL046979
213071_at	1.51e-09	7.02e-11	-7.80338	14.4795	-2.32519	DPT	dermatopontin	1805
203328_x_at	1.53e-09	7.1e-11	-7.80084	14.4693	-1.02433	IDE	insulin degrading enzyme	3416			NM_004969
211073_x_at	1.53e-09	7.11e-11	-7.80031	14.4671	-0.764485	SNORD83B///SNORD139///RPL3	small nucleolar RNA, C/D box 83B///small nucleolar RNA, C/D box 139///ribosomal protein L3	116938///116936///6122			BC006483
208943_s_at	1.53e-09	7.15e-11	-7.79915	14.4625	-0.90205	SEC62	SEC62 homolog, preprotein translocation factor	7095			U93239
205240_at	1.55e-09	7.25e-11	-7.79564	14.4484	-2.37709	GPSM2	G-protein signaling modulator 2	29899			NM_013296
200012_x_at	1.56e-09	7.3e-11	-7.79383	14.4412	-0.812943	RPL21P28///SNORA27///SNORD102///RPL21	ribosomal protein L21 pseudogene 28///small nucleolar RNA, H/ACA box 27///small nucleolar RNA, C/D box 102///ribosomal protein L21	100131205///619499///26771///6144	NA	NA	NM_000982
205498_at	1.61e-09	7.55e-11	-7.78558	14.4081	-2.20602	GHR	growth hormone receptor	2690			NM_000163
218919_at	1.61e-09	7.57e-11	-7.78504	14.406	-1.30414	ZFAND1	zinc finger AN1-type containing 1	79752			NM_024699
209272_at	1.64e-09	7.7e-11	-7.78089	14.3893	-1.17756	NAB1	NGFI-A binding protein 1	4664			AF045451
211475_s_at	1.66e-09	7.83e-11	-7.77676	14.3728	-0.992803	BAG1	BCL2 associated athanogene 1	573			AF116273
209529_at	1.68e-09	7.91e-11	-7.7742	14.3626	-3.09253	PLPP2	phospholipid phosphatase 2	8612			AF047760
221656_s_at	1.69e-09	7.98e-11	-7.77199	14.3537	-0.887306	ARHGEF10L	Rho guanine nucleotide exchange factor 10 like	55160			BC003073
211194_s_at	1.7e-09	8.02e-11	-7.77075	14.3487	-3.31551	TP63	tumor protein p63	8626			AB010153
212039_x_at	1.76e-09	8.38e-11	-7.75989	14.3052	-0.749505	SNORD83B///SNORD139///RPL3	small nucleolar RNA, C/D box 83B///small nucleolar RNA, C/D box 139///ribosomal protein L3	116938///116936///6122			BG339228
203463_s_at	1.78e-09	8.46e-11	-7.75771	14.2965	-2.08717	EPN2-IT1///EPN2	EPN2 intronic transcript 1///epsin 2	100874309///22905			H05668
212323_s_at	1.8e-09	8.57e-11	-7.75455	14.2838	-0.75033	VPS13D	vacuolar protein sorting 13 homolog D	55187			AA524553
209885_at	1.83e-09	8.74e-11	-7.74954	14.2637	-2.96306	RHOD	ras homolog family member D	29984			BC001338
201677_at	1.84e-09	8.78e-11	-7.74838	14.2591	-0.610089	HMCES	5-hydroxymethylcytosine (hmC) binding, ES cell-specific	56941			AI937543
207895_at	1.84e-09	8.79e-11	-7.74832	14.2588	-2.08672	NAALADL1	N-acetylated alpha-linked acidic dipeptidase-like 1	10004			NM_005468
214091_s_at	1.84e-09	8.82e-11	-7.74739	14.2551	-2.91802	GPX3	glutathione peroxidase 3	2878
210582_s_at	1.84e-09	8.83e-11	-7.74714	14.2541	-1.22995	LIMK2	LIM domain kinase 2	3985			AL117466
218792_s_at	1.87e-09	8.97e-11	-7.74322	14.2384	-2.31589	BSPRY	B-box and SPRY domain containing	54836			NM_017688
204037_at	1.91e-09	9.16e-11	-7.73803	14.2176	-2.07573	LPAR1	lysophosphatidic acid receptor 1	1902			BF055366
216905_s_at	1.93e-09	9.25e-11	-7.73559	14.2078	-2.65617	ST14	suppression of tumorigenicity 14	6768			U20428
202708_s_at	2e-09	9.65e-11	-7.72515	14.166	-1.28634	HIST2H2BE	histone cluster 2, H2be	8349			NM_003528
204713_s_at	2.06e-09	9.97e-11	-7.71716	14.134	-2.27799	F5	coagulation factor V	2153
218962_s_at	2.06e-09	1e-10	-7.71645	14.1311	-1.07819	TMEM168	transmembrane protein 168	64418			NM_022484
205560_at	2.08e-09	1.01e-10	-7.71472	14.1242	-2.15108	PCSK5	proprotein convertase subtilisin/kexin type 5	5125			NM_006200
213940_s_at	2.09e-09	1.02e-10	-7.71269	14.1161	-1.21692	FNBP1	formin binding protein 1	23048			AU145053
221665_s_at	2.13e-09	1.04e-10	-7.70796	14.0971	-2.01343	EPS8L1	EPS8 like 1	54869			BC004907
211841_s_at	2.13e-09	1.04e-10	-7.70733	14.0946	-2.12774	TNFRSF25	TNF receptor superfamily member 25	8718			U94510
209062_x_at	2.24e-09	1.1e-10	-7.6939	14.0408	-1.73224	NCOA3	nuclear receptor coactivator 3	8202			AF010227
220266_s_at	2.26e-09	1.1e-10	-7.69216	14.0338	-2.5999	KLF4	Kruppel like factor 4	9314			NM_004235
220289_s_at	2.26e-09	1.11e-10	-7.69097	14.029	-2.62322	AIM1L	absent in melanoma 1-like	55057
204749_at	2.41e-09	1.19e-10	-7.67428	13.9622	-2.6085	NAP1L3	nucleosome assembly protein 1 like 3	4675			NM_004538
209386_at	2.48e-09	1.22e-10	-7.66676	13.9321	-1.56145	TM4SF1	transmembrane 4 L six family member 1	4071
218326_s_at	2.49e-09	1.23e-10	-7.66548	13.9269	-2.38574	LGR4	leucine rich repeat containing G protein-coupled receptor 4	55366			NM_018490
204288_s_at	2.52e-09	1.25e-10	-7.66258	13.9154	-2.82431	SORBS2	sorbin and SH3 domain containing 2	8470			NM_021069
203798_s_at	2.62e-09	1.3e-10	-7.65214	13.8735	-2.81756	VSNL1	visinin like 1	7447			NM_003385
205404_at	2.69e-09	1.34e-10	-7.64539	13.8465	-1.9272	HSD11B1	hydroxysteroid 11-beta dehydrogenase 1	3290			NM_005525
200061_s_at	2.73e-09	1.36e-10	-7.64084	13.8283	-0.710161	RPS24	ribosomal protein S24	6229	NA	NA	BC000523
222229_x_at	2.74e-09	1.37e-10	-7.63978	13.824	-1.0019
205969_at	2.79e-09	1.39e-10	-7.63466	13.8035	-2.5669	AADAC	arylacetamide deacetylase	13			NM_001086
201241_at	2.8e-09	1.4e-10	-7.63385	13.8003	-0.593522	DDX1	DEAD/H-box helicase 1	1653			NM_004939
217873_at	2.85e-09	1.43e-10	-7.6292	13.7816	-1.01696	CAB39	calcium binding protein 39	51719			NM_016289
210086_at	2.89e-09	1.45e-10	-7.62499	13.7648	-2.19947	HR	hair growth associated	55806			AF039196
210325_at	2.91e-09	1.47e-10	-7.62257	13.7551	-1.33313	CD1A	CD1a molecule	909			M28825
215066_at	2.96e-09	1.49e-10	-7.61802	13.7369	-1.73486	PTPRF	protein tyrosine phosphatase, receptor type F	5792			AU158443
212875_s_at	2.98e-09	1.5e-10	-7.61641	13.7304	-1.48442	C2CD2	C2 calcium dependent domain containing 2	25966
218858_at	2.99e-09	1.51e-10	-7.61493	13.7245	-1.11382	DEPTOR	DEP domain containing MTOR-interacting protein	64798			NM_022783
207254_at	3.08e-09	1.56e-10	-7.60741	13.6944	-2.92872	SLC15A1	solute carrier family 15 member 1	6564			NM_005073
217833_at	3.12e-09	1.58e-10	-7.60424	13.6817	-0.855687	SYNCRIP	synaptotagmin binding cytoplasmic RNA interacting protein	10492			AL520908
213375_s_at	3.12e-09	1.58e-10	-7.60337	13.6782	-1.51119	N4BP2L1	NEDD4 binding protein 2 like 1	90634			N80918
211458_s_at	3.14e-09	1.59e-10	-7.60197	13.6726	-1.27438	GABARAPL3///GABARAPL1	GABA type A receptor associated protein like 3 pseudogene///GABA type A receptor associated protein like 1	23766///23710			AF180519
204089_x_at	3.16e-09	1.61e-10	-7.59937	13.6622	-0.976216	MAP3K4	mitogen-activated protein kinase kinase kinase 4	4216			NM_006724
205011_at	3.3e-09	1.68e-10	-7.58863	13.6192	-1.10609	VWA5A	von Willebrand factor A domain containing 5A	4013			NM_014622
201612_at	3.33e-09	1.7e-10	-7.58558	13.607	-0.840915	ALDH9A1	aldehyde dehydrogenase 9 family member A1	223			NM_000696
200620_at	3.45e-09	1.76e-10	-7.57681	13.5719	-1.08876	TMEM59	transmembrane protein 59	9528			NM_004872
216356_x_at	3.53e-09	1.81e-10	-7.57087	13.5481	-1.97171	BAIAP3	BAI1 associated protein 3	8938			AB018277
205475_at	3.53e-09	1.81e-10	-7.57078	13.5477	-2.10221	SCRG1	stimulator of chondrogenesis 1	11341			NM_007281
221526_x_at	3.53e-09	1.81e-10	-7.57035	13.546	-1.69735	PARD3	par-3 family cell polarity regulator	56288			AW452651
206165_s_at	3.55e-09	1.83e-10	-7.56807	13.5369	-3.33632	CLCA2	chloride channel accessory 2	9635			NM_006536
212599_at	3.65e-09	1.88e-10	-7.561	13.5086	-0.90275	AUTS2	autism susceptibility candidate 2	26053			AK025298
205349_at	3.73e-09	1.93e-10	-7.55517	13.4852	-1.80386	GNA15	G protein subunit alpha 15	2769			NM_002068
219095_at	3.82e-09	1.98e-10	-7.54819	13.4572	-2.43426	PLA2G4B///JMJD7-PLA2G4B	phospholipase A2 group IVB///JMJD7-PLA2G4B readthrough	100137049///8681			NM_005090
203026_at	3.84e-09	2e-10	-7.54653	13.4506	-0.705353	ZBTB5	zinc finger and BTB domain containing 5	9925			NM_014872
203386_at	3.85e-09	2.01e-10	-7.54532	13.4458	-1.11218	TBC1D4	TBC1 domain family member 4	9882			AI650848
219856_at	3.94e-09	2.05e-10	-7.53961	13.4229	-2.08042	C1orf116	chromosome 1 open reading frame 116	79098			NM_023938
210024_s_at	4.11e-09	2.15e-10	-7.52822	13.3773	-1.3776	UBE2E3	ubiquitin conjugating enzyme E2 E3	10477			AB017644
215333_x_at	4.12e-09	2.16e-10	-7.52741	13.3741	-1.14555	GSTM1	glutathione S-transferase mu 1	2944			X08020
217732_s_at	4.12e-09	2.16e-10	-7.52674	13.3714	-1.00192	ITM2B	integral membrane protein 2B	9445			AF092128
208190_s_at	4.17e-09	2.19e-10	-7.52336	13.3579	-2.65392	LSR	lipolysis stimulated lipoprotein receptor	51599			NM_015925
213941_x_at	4.19e-09	2.2e-10	-7.52225	13.3534	-0.800232	RPS7	ribosomal protein S7	6201
207463_x_at	4.24e-09	2.24e-10	-7.51866	13.3391	-1.73282	PRSS3	protease, serine 3	5646			NM_002771
219115_s_at	4.3e-09	2.27e-10	-7.51529	13.3256	-3.03746	IL20RA	interleukin 20 receptor subunit alpha	53832			NM_014432
213618_at	4.35e-09	2.3e-10	-7.51183	13.3117	-1.88473	ARAP2	ArfGAP with RhoGAP domain, ankyrin repeat and PH domain 2	116984			AB011152
215116_s_at	4.38e-09	2.32e-10	-7.50963	13.3029	-1.33558	DNM1	dynamin 1	1759			AF035321
214657_s_at	4.42e-09	2.34e-10	-7.50719	13.2931	-1.45237	MIR612///NEAT1	microRNA 612///nuclear paraspeckle assembly transcript 1 (non-protein coding)	693197///283131			AU134977
215513_at	4.52e-09	2.41e-10	-7.50025	13.2654	-2.02531	HYMAI	hydatidiform mole associated and imprinted (non-protein coding)	57061
212640_at	4.65e-09	2.48e-10	-7.49299	13.2363	-0.933963	HACD2	3-hydroxyacyl-CoA dehydratase 2	201562			AV712602
204059_s_at	4.66e-09	2.49e-10	-7.49232	13.2336	-2.52089	ME1	malic enzyme 1	4199			NM_002395
213546_at	4.66e-09	2.49e-10	-7.49184	13.2317	-1.07769	DKFZP586I1420	uncharacterized protein DKFZp586I1420	222161			AL050378
218795_at	4.68e-09	2.5e-10	-7.49074	13.2273	-1.31838	ACP6	acid phosphatase 6, lysophosphatidic	51205			NM_016361
205534_at	4.74e-09	2.54e-10	-7.48743	13.2141	-2.44745	PCDH7	protocadherin 7	5099			NM_002589
216379_x_at	4.74e-09	2.54e-10	-7.48721	13.2132	-3.65434	CD24	CD24 molecule	100133941
220413_at	4.77e-09	2.56e-10	-7.48498	13.2043	-1.98563	SLC39A2	solute carrier family 39 member 2	29986			NM_014579
219695_at	4.81e-09	2.59e-10	-7.48258	13.1946	-2.29938	SMPD3	sphingomyelin phosphodiesterase 3	55512			NM_018667
215465_at	4.88e-09	2.64e-10	-7.47802	13.1764	-3.24084	ABCA12	ATP binding cassette subfamily A member 12	26154			AL080207
205672_at	4.97e-09	2.69e-10	-7.47348	13.1583	-1.74653	XPA	XPA, DNA damage recognition and repair factor	7507			NM_000380
202011_at	4.99e-09	2.7e-10	-7.47223	13.1532	-1.25636	TJP1	tight junction protein 1	7082			NM_003257
203038_at	5e-09	2.71e-10	-7.47161	13.1508	-1.09707	PTPRK	protein tyrosine phosphatase, receptor type K	5796			NM_002844
213832_at	5.02e-09	2.72e-10	-7.47031	13.1456	-1.04439	KCND3	potassium voltage-gated channel subfamily D member 3	3752			AA530995
206125_s_at	5.03e-09	2.73e-10	-7.46945	13.1421	-2.01885	KLK8	kallikrein related peptidase 8	11202			NM_007196
220428_at	5.03e-09	2.73e-10	-7.4694	13.1419	-2.69387	CD207	CD207 molecule	50489			NM_015717
219360_s_at	5.09e-09	2.77e-10	-7.46603	13.1284	-2.40962	TRPM4	transient receptor potential cation channel subfamily M member 4	54795			NM_017636
212066_s_at	5.21e-09	2.84e-10	-7.46012	13.1048	-0.69215	USP34	ubiquitin specific peptidase 34	9736			AB018272
201427_s_at	5.22e-09	2.84e-10	-7.45938	13.1018	-3.05821	SEPP1	selenoprotein P, plasma, 1	6414			NM_005410
204254_s_at	5.29e-09	2.89e-10	-7.45541	13.086	-1.88321	VDR	vitamin D (1,25- dihydroxyvitamin D3) receptor	7421			NM_000376
200082_s_at	5.31e-09	2.91e-10	-7.45402	13.0804	-0.597822	RPS7	ribosomal protein S7	6201
213540_at	5.34e-09	2.93e-10	-7.45238	13.0738	-1.15931	HSD17B8	hydroxysteroid 17-beta dehydrogenase 8	7923
203799_at	5.39e-09	2.96e-10	-7.44985	13.0637	-1.97454	LY75-CD302///CD302///LY75	LY75-CD302 readthrough///CD302 molecule///lymphocyte antigen 75	100526664///9936///4065			NM_014880
208093_s_at	5.46e-09	3e-10	-7.44647	13.0502	-0.898109	NDEL1	nudE neurodevelopment protein 1 like 1	81565			NM_030808
205916_at	5.46e-09	3e-10	-7.44597	13.0482	-6.31246	S100A7	S100 calcium binding protein A7	6278			NM_002963
212675_s_at	5.65e-09	3.12e-10	-7.43697	13.0122	-0.823192	CEP68	centrosomal protein 68	23177			AB011154
211607_x_at	5.67e-09	3.13e-10	-7.43605	13.0085	-1.32501	EGFR	epidermal growth factor receptor	1956			U48722
216320_x_at	5.79e-09	3.19e-10	-7.43084	12.9877	-1.31418	MST1	macrophage stimulating 1	4485			U37055
41858_at	5.81e-09	3.21e-10	-7.42985	12.9837	-0.846099	PGAP2	post-GPI attachment to proteins 2	27315			AL049261
209771_x_at	5.82e-09	3.22e-10	-7.42915	12.9809	-4.4688	CD24	CD24 molecule	100133941
202554_s_at	5.87e-09	3.25e-10	-7.42629	12.9695	-1.50229	GSTM3	glutathione S-transferase mu 3	2947			AL527430
219093_at	5.9e-09	3.27e-10	-7.42507	12.9646	-2.25851	PID1	phosphotyrosine interaction domain containing 1	55022			NM_017933
60474_at	5.95e-09	3.3e-10	-7.42254	12.9544	-2.20347	FERMT1	fermitin family member 1	55612			AA469071
219461_at	5.99e-09	3.33e-10	-7.42068	12.947	-1.86058	PAK6	p21 (RAC1) activated kinase 6	56924			AJ236915
211285_s_at	6.03e-09	3.35e-10	-7.41879	12.9395	-1.12839	UBE3A	ubiquitin protein ligase E3A	7337			U84404
206423_at	6.14e-09	3.41e-10	-7.41447	12.9222	-3.48425	ANGPTL7	angiopoietin like 7	10218			NM_021146
211372_s_at	6.19e-09	3.45e-10	-7.41205	12.9125	-2.63201	IL1R2	interleukin 1 receptor type 2	7850			U64094
222303_at	6.44e-09	3.6e-10	-7.40122	12.8692	-2.11571				Transcribed locus	Hs.663673	AV700891
203972_s_at	6.46e-09	3.62e-10	-7.40018	12.865	-0.950917	PEX3	peroxisomal biogenesis factor 3	8504			AB035307
203881_s_at	6.46e-09	3.62e-10	-7.40013	12.8648	-1.48734	DMD	dystrophin	1756			NM_004010
202748_at	6.62e-09	3.71e-10	-7.39379	12.8395	-1.51121	GBP2	guanylate binding protein 2	2634			NM_004120
210094_s_at	6.64e-09	3.73e-10	-7.39295	12.8361	-1.51908	PARD3	par-3 family cell polarity regulator	56288			AF196186
200032_s_at	6.7e-09	3.77e-10	-7.39033	12.8256	-0.671554	RPL9	ribosomal protein L9	6133	NA	NA	NM_000661
218263_s_at	6.75e-09	3.8e-10	-7.38803	12.8164	-0.990457	ZBED5	zinc finger BED-type containing 5	58486			NM_021211
219259_at	6.76e-09	3.81e-10	-7.38776	12.8154	-1.29707	SEMA4A	semaphorin 4A	64218			NM_022367
219396_s_at	6.77e-09	3.82e-10	-7.38706	12.8126	-1.29882	MIR631///NEIL1	microRNA 631///nei like DNA glycosylase 1	693216///79661			NM_024608
215440_s_at	6.79e-09	3.83e-10	-7.38626	12.8094	-2.35762	BEX4	brain expressed X-linked 4	56271			AL523320
200781_s_at	6.84e-09	3.86e-10	-7.38426	12.8014	-0.678173	RPS15A	ribosomal protein S15a	6210			NM_001019
213122_at	6.88e-09	3.89e-10	-7.38231	12.7936	-2.14175	TSPYL5	TSPY like 5	85453			AI096375
213380_x_at	6.9e-09	3.9e-10	-7.3815	12.7903	-0.788678	LOC102724562///MST1L///MST1P2///MST1	macrophage stimulating 1 pseudogene///macrophage stimulating 1 like///macrophage stimulating 1 pseudogene 2///macrophage stimulating 1	102724562///11223///11209///4485
204937_s_at	6.9e-09	3.91e-10	-7.38137	12.7898	-1.53451	ZNF274	zinc finger protein 274	10782			NM_016325
202909_at	7.08e-09	4.01e-10	-7.3748	12.7636	-1.03034	EPM2AIP1	EPM2A interacting protein 1	9852			NM_014805
204363_at	7.17e-09	4.07e-10	-7.37107	12.7486	-2.7914	F3	coagulation factor III, tissue factor	2152			NM_001993
212151_at	7.17e-09	4.08e-10	-7.3709	12.748	-2.23025	PBX1	PBX homeobox 1	5087			BF967998
218486_at	7.18e-09	4.08e-10	-7.37032	12.7456	-0.850957	KLF11	Kruppel like factor 11	8462			AA149594
205005_s_at	7.26e-09	4.14e-10	-7.36713	12.7329	-1.16676	NMT2	N-myristoyltransferase 2	9397			AW293531
205022_s_at	7.34e-09	4.19e-10	-7.36395	12.7202	-0.958694	FOXN3	forkhead box N3	1112			NM_005197
220994_s_at	7.39e-09	4.23e-10	-7.36191	12.712	-3.23715	STXBP6	syntaxin binding protein 6	29091			NM_014178
202468_s_at	7.61e-09	4.37e-10	-7.35365	12.679	-1.6311	CTNNAL1	catenin alpha like 1	8727			NM_003798
218174_s_at	7.61e-09	4.37e-10	-7.35358	12.6788	-1.26031	TMEM254	transmembrane protein 254	80195			NM_025125
217870_s_at	7.76e-09	4.46e-10	-7.34856	12.6587	-0.912471	CMPK1	cytidine/uridine monophosphate kinase 1	51727			NM_016308
218319_at	7.95e-09	4.59e-10	-7.34172	12.6313	-1.27767	PELI1	pellino E3 ubiquitin protein ligase 1	57162			NM_020651
209436_at	7.96e-09	4.6e-10	-7.34129	12.6296	-1.34491	SPON1	spondin 1	10418			AB018305
216836_s_at	8.16e-09	4.72e-10	-7.33457	12.6027	-1.35715	ERBB2	erb-b2 receptor tyrosine kinase 2	2064			X03363
204201_s_at	8.17e-09	4.74e-10	-7.33393	12.6002	-1.47778	PTPN13	protein tyrosine phosphatase, non-receptor type 13	5783			NM_006264
219938_s_at	8.18e-09	4.74e-10	-7.33346	12.5983	-1.47442	PSTPIP2	proline-serine-threonine phosphatase interacting protein 2	9050			NM_024430
217898_at	8.18e-09	4.75e-10	-7.33319	12.5972	-1.0779	EMC7	ER membrane protein complex subunit 7	56851			NM_020154
203406_at	8.22e-09	4.78e-10	-7.33163	12.591	-0.884636	MFAP1	microfibrillar associated protein 1	4236			NM_005926
203642_s_at	8.23e-09	4.79e-10	-7.33126	12.5895	-1.06296	COBLL1	cordon-bleu WH2 repeat protein like 1	22837			NM_014900
218706_s_at	8.3e-09	4.83e-10	-7.32892	12.5802	-1.36591	GRAMD3	GRAM domain containing 3	65983			AW575493
203513_at	8.34e-09	4.86e-10	-7.32734	12.5739	-0.835224	SPG11	spastic paraplegia 11 (autosomal recessive)	80208			NM_025137
205337_at	8.52e-09	4.98e-10	-7.32171	12.5514	-4.62824	DCT	dopachrome tautomerase	1638
201161_s_at	8.62e-09	5.04e-10	-7.3188	12.5397	-1.23019	YBX3	Y-box binding protein 3	8531			NM_003651
219319_at	8.74e-09	5.12e-10	-7.31471	12.5234	-1.6128	HIF3A	hypoxia inducible factor 3 alpha subunit	64344			NM_022462
209193_at	8.83e-09	5.18e-10	-7.3119	12.5122	-1.07436	PIM1	Pim-1 proto-oncogene, serine/threonine kinase	5292			M24779
200009_at	8.83e-09	5.18e-10	-7.31181	12.5118	-1.01765	GDI2	GDP dissociation inhibitor 2	2665	NA	NA	NM_001494
210260_s_at	8.92e-09	5.24e-10	-7.3091	12.501	-1.49087	TNFAIP8	TNF alpha induced protein 8	25816			BC005352
216347_s_at	8.97e-09	5.28e-10	-7.3073	12.4938	-0.744542	PPP1R13B	protein phosphatase 1 regulatory subunit 13B	23368
209907_s_at	9.05e-09	5.33e-10	-7.30486	12.4841	-0.599262	ITSN2	intersectin 2	50618			AF182198
203812_at	9.08e-09	5.35e-10	-7.30397	12.4805	-1.57096	SLIT3	slit guidance ligand 3	6586			AB011538
222195_s_at	9.16e-09	5.41e-10	-7.30134	12.47	-1.71623	TRMO	tRNA methyltransferase O	51531			AK023069
208923_at	9.23e-09	5.45e-10	-7.29913	12.4612	-1.27813	CYFIP1	cytoplasmic FMR1 interacting protein 1	23191			BC005097
209337_at	9.42e-09	5.57e-10	-7.29399	12.4406	-0.882921	PSIP1	PC4 and SFRS1 interacting protein 1	11168			AF063020
209740_s_at	9.47e-09	5.6e-10	-7.29247	12.4345	-1.77384	PNPLA4	patatin like phospholipase domain containing 4	8228			U03886
209301_at	9.47e-09	5.61e-10	-7.29208	12.433	-3.35826	CA2	carbonic anhydrase 2	760			M36532
212202_s_at	9.47e-09	5.62e-10	-7.29194	12.4324	-1.26721	TMEM87A	transmembrane protein 87A	25963			BG493972
200023_s_at	9.57e-09	5.68e-10	-7.2891	12.4211	-0.63636	EIF3F	eukaryotic translation initiation factor 3 subunit F	8665	NA	NA	NM_003754
221045_s_at	9.63e-09	5.72e-10	-7.28738	12.4142	-1.04795	PER3	period circadian clock 3	8863			NM_016831
205464_at	9.74e-09	5.8e-10	-7.28388	12.4002	-1.92297	SCNN1B	sodium channel epithelial 1 beta subunit	6338			NM_000336
218810_at	9.8e-09	5.85e-10	-7.282	12.3927	-2.49076	MIR6732///ZC3H12A	microRNA 6732///zinc finger CCCH-type containing 12A	102465438///80149			NM_025079
206166_s_at	9.93e-09	5.94e-10	-7.27813	12.3773	-2.53458	CLCA2	chloride channel accessory 2	9635			AF043977
217961_at	1e-08	6e-10	-7.27564	12.3673	-1.50223	SLC25A38	solute carrier family 25 member 38	54977			NM_017875
219946_x_at	1e-08	6.03e-10	-7.27435	12.3622	-1.22767	MYH14	myosin, heavy chain 14, non-muscle	79784			NM_024729
204679_at	1.02e-08	6.16e-10	-7.26926	12.3418	-2.01271	KCNK1	potassium two pore domain channel subfamily K member 1	3775			NM_002245
218613_at	1.04e-08	6.27e-10	-7.2648	12.324	-1.6995	PSD3	pleckstrin and Sec7 domain containing 3	23362			NM_015310
218021_at	1.04e-08	6.3e-10	-7.26352	12.3189	-0.755112	DHRS4L2///DHRS4	dehydrogenase/reductase 4 like 2///dehydrogenase/reductase 4	317749///10901			NM_021004
218922_s_at	1.04e-08	6.3e-10	-7.26352	12.3189	-2.27506	CERS4	ceramide synthase 4	79603			NM_024552
209633_at	1.06e-08	6.44e-10	-7.25809	12.2972	-1.22075	PPP2R3A	protein phosphatase 2 regulatory subunit B''alpha	5523			AL389975
204351_at	1.07e-08	6.5e-10	-7.25599	12.2889	-2.89083	S100P	S100 calcium binding protein P	6286			NM_005980
219313_at	1.09e-08	6.59e-10	-7.25233	12.2743	-2.07711	GRAMD1C	GRAM domain containing 1C	54762			NM_017577
202552_s_at	1.1e-08	6.66e-10	-7.25007	12.2652	-1.71759	LOC101929500///CRIM1	uncharacterized LOC101929500///cysteine rich transmembrane BMP regulator 1	101929500///51232			NM_016441
205158_at	1.12e-08	6.86e-10	-7.24254	12.2352	-1.965	RNASE4	ribonuclease A family member 4	6038			NM_002937
213992_at	1.13e-08	6.89e-10	-7.24154	12.2312	-1.52568	COL4A6	collagen type IV alpha 6 chain	1288			AI889941
204112_s_at	1.14e-08	6.96e-10	-7.23906	12.2213	-1.93315	HNMT	histamine N-methyltransferase	3176			NM_006895
219630_at	1.14e-08	6.99e-10	-7.23797	12.2169	-2.40436	PDZK1IP1	PDZK1 interacting protein 1	10158			NM_005764
213808_at	1.15e-08	7.02e-10	-7.23709	12.2134	-3.46535	ADAM23	ADAM metallopeptidase domain 23	8745			BE674466
205141_at	1.15e-08	7.05e-10	-7.236	12.209	-1.21156	ANG	angiogenin	283			NM_001145
202449_s_at	1.22e-08	7.47e-10	-7.22155	12.1514	-0.884923	RXRA	retinoid X receptor alpha	6256			NM_002957
200907_s_at	1.22e-08	7.51e-10	-7.22035	12.1466	-2.27595	PALLD	palladin, cytoskeletal associated protein	23022			AU157932
205338_s_at	1.27e-08	7.81e-10	-7.21065	12.1079	-3.57145	DCT	dopachrome tautomerase	1638			NM_001922
211033_s_at	1.29e-08	7.96e-10	-7.2059	12.0889	-0.748493	PEX7	peroxisomal biogenesis factor 7	5191			BC006268
200926_at	1.29e-08	8e-10	-7.20471	12.0842	-0.621975	RPS23	ribosomal protein S23	6228			NM_001025
218258_at	1.31e-08	8.09e-10	-7.20207	12.0736	-0.766206	POLR1D	RNA polymerase I subunit D	51082			NM_015972
203021_at	1.36e-08	8.41e-10	-7.19244	12.0352	-2.50136	SLPI	secretory leukocyte peptidase inhibitor	6590			NM_003064
202462_s_at	1.37e-08	8.51e-10	-7.18943	12.0232	-0.964999	DDX46	DEAD-box helicase 46	9879			NM_014829
200034_s_at	1.4e-08	8.68e-10	-7.18453	12.0036	-0.609357	RPL6	ribosomal protein L6	6128	NA	NA	NM_000970
209620_s_at	1.4e-08	8.71e-10	-7.18368	12.0003	-1.01541	ABCB7	ATP binding cassette subfamily B member 7	22			AB005289
201348_at	1.4e-08	8.72e-10	-7.18337	11.999	-2.98622	GPX3	glutathione peroxidase 3	2878			NM_002084
214382_at	1.43e-08	8.89e-10	-7.17876	11.9806	-2.51858	UNC93A	unc-93 homolog A (C. elegans)	54346
213398_s_at	1.43e-08	8.95e-10	-7.17697	11.9735	-0.867587	SDR39U1	short chain dehydrogenase/reductase family 39U member 1	56948
219976_at	1.5e-08	9.38e-10	-7.16558	11.9281	-2.1877	HOOK1	hook microtubule tethering protein 1	51361			NM_015888
201022_s_at	1.5e-08	9.41e-10	-7.16456	11.924	-0.747663	DSTN	destrin, actin depolymerizing factor	11034			NM_006870
205064_at	1.53e-08	9.62e-10	-7.15914	11.9024	-4.09806	SPRR1B	small proline rich protein 1B	6699			NM_003125
214143_x_at	1.53e-08	9.65e-10	-7.15851	11.8999	-0.805232	RPL24	ribosomal protein L24	6152
204675_at	1.54e-08	9.69e-10	-7.15754	11.896	-1.5569	SRD5A1	steroid 5 alpha-reductase 1	6715			NM_001047
204004_at	1.54e-08	9.7e-10	-7.15722	11.8947	-2.39112	PAWR	pro-apoptotic WT1 regulator	5074
204714_s_at	1.54e-08	9.71e-10	-7.15703	11.894	-2.27401	F5	coagulation factor V	2153			NM_000130
218739_at	1.56e-08	9.83e-10	-7.15401	11.8819	-1.1422	ABHD5	abhydrolase domain containing 5	51099			NM_016006
221547_at	1.61e-08	1.02e-09	-7.14552	11.8481	-0.694877	PRPF18	pre-mRNA processing factor 18	8559			BC000794
202267_at	1.61e-08	1.02e-09	-7.14473	11.8449	-1.61938	LAMC2	laminin subunit gamma 2	3918			NM_005562
202242_at	1.61e-08	1.02e-09	-7.14466	11.8446	-2.6355	TSPAN7	tetraspanin 7	7102			NM_004615
218285_s_at	1.63e-08	1.04e-09	-7.14044	11.8278	-0.961388	BDH2	3-hydroxybutyrate dehydrogenase, type 2	56898			NM_020139
209376_x_at	1.63e-08	1.04e-09	-7.14042	11.8277	-0.848958	SCAF11	SR-related CTD associated factor 11	9169
203029_s_at	1.75e-08	1.12e-09	-7.12144	11.7521	-2.09895	PTPRN2	protein tyrosine phosphatase, receptor type N2	5799			NM_002847
206693_at	1.77e-08	1.13e-09	-7.11921	11.7432	-2.00444	IL7	interleukin 7	3574			NM_000880
219038_at	1.79e-08	1.15e-09	-7.11563	11.7289	-0.600647	MORC4	MORC family CW-type zinc finger 4	79710			NM_024657
212257_s_at	1.8e-08	1.16e-09	-7.11369	11.7212	-1.38691	SMARCA2	SWI/SNF related, matrix associated, actin dependent regulator of chromatin, subfamily a, member 2	6595
209250_at	1.87e-08	1.2e-09	-7.1038	11.6818	-1.35351	DEGS1	delta 4-desaturase, sphingolipid 1	8560			BC000961
206295_at	1.89e-08	1.21e-09	-7.10173	11.6736	-2.81253	IL18	interleukin 18	3606			NM_001562
205125_at	1.91e-08	1.23e-09	-7.09849	11.6606	-1.42372	PLCD1	phospholipase C delta 1	5333			NM_006225
218718_at	1.92e-08	1.24e-09	-7.09699	11.6547	-1.72404	PDGFC	platelet derived growth factor C	56034			NM_016205
202546_at	1.96e-08	1.27e-09	-7.09154	11.6329	-2.3753	VAMP8	vesicle associated membrane protein 8	8673			NM_003761
210298_x_at	1.97e-08	1.27e-09	-7.09086	11.6302	-2.6839	FHL1	four and a half LIM domains 1	2273			AF098518
204550_x_at	2.02e-08	1.31e-09	-7.08355	11.6011	-1.23682	GSTM1	glutathione S-transferase mu 1	2944			NM_000561
201125_s_at	2.03e-08	1.32e-09	-7.08199	11.5949	-2.09947	ITGB5	integrin subunit beta 5	3693			NM_002213
203140_at	2.08e-08	1.35e-09	-7.0758	11.5702	-1.41333	BCL6	B-cell CLL/lymphoma 6	604			NM_001706
204069_at	2.08e-08	1.35e-09	-7.07574	11.57	-1.00365	MEIS1	Meis homeobox 1	4211			NM_002398
202724_s_at	2.09e-08	1.36e-09	-7.07385	11.5625	-1.18221	FOXO1	forkhead box O1	2308			NM_002015
203636_at	2.11e-08	1.38e-09	-7.07064	11.5497	-1.78982	MID1	midline 1	4281			BE967532
204600_at	2.13e-08	1.39e-09	-7.06853	11.5413	-1.47701	EPHB3	EPH receptor B3	2049			NM_004443
217883_at	2.2e-08	1.44e-09	-7.05958	11.5056	-1.18971	MMADHC	methylmalonic aciduria and homocystinuria, cblD type	27249			NM_015702
209720_s_at	2.24e-08	1.47e-09	-7.05474	11.4864	-4.81202	SERPINB3	serpin family B member 3	6317			BC005224
209028_s_at	2.24e-08	1.47e-09	-7.05394	11.4832	-1.15905	ABI1	abl interactor 1	10006			AF006516
213377_x_at	2.24e-08	1.47e-09	-7.05386	11.4829	-0.823585	RPS12	ribosomal protein S12	6206
216221_s_at	2.26e-08	1.49e-09	-7.05142	11.4732	-0.482361	PUM2	pumilio RNA binding family member 2	23369			D87078
205569_at	2.29e-08	1.51e-09	-7.04786	11.459	-2.92011	LAMP3	lysosomal associated membrane protein 3	27074			NM_014398
212589_at	2.3e-08	1.52e-09	-7.04658	11.4539	-1.83895	RRAS2	related RAS viral (r-ras) oncogene homolog 2	22800			AI753792
208770_s_at	2.34e-08	1.54e-09	-7.04251	11.4377	-0.720815	EIF4EBP2	eukaryotic translation initiation factor 4E binding protein 2	1979			BC005057
266_s_at	2.34e-08	1.55e-09	-7.04204	11.4358	-3.97007	CD24	CD24 molecule	100133941			L33930
208517_x_at	2.37e-08	1.57e-09	-7.03823	11.4207	-0.780945	BTF3	basic transcription factor 3	689			NM_001207
219103_at	2.38e-08	1.57e-09	-7.03776	11.4188	-2.15329	ASAP3	ArfGAP with SH3 domain, ankyrin repeat and PH domain 3	55616			NM_017707
212627_s_at	2.4e-08	1.59e-09	-7.03528	11.4089	-0.832259	EXOSC7	exosome component 7	23016			AL581473
203987_at	2.48e-08	1.65e-09	-7.0261	11.3724	-1.60216	FZD6	frizzled class receptor 6	8323			NM_003506
222333_at	2.52e-08	1.68e-09	-7.02132	11.3533	-0.790838	ALS2CL	ALS2 C-terminal like	259173			AV661533
221470_s_at	2.58e-08	1.72e-09	-7.01564	11.3307	-3.00679	IL37	interleukin 37	27178			NM_014439
206101_at	2.6e-08	1.74e-09	-7.01329	11.3214	-1.17098	ECM2	extracellular matrix protein 2	1842			NM_001393
206604_at	2.6e-08	1.74e-09	-7.01312	11.3207	-1.9909	OVOL1	ovo like transcriptional repressor 1	5017			NM_004561
209307_at	2.6e-08	1.74e-09	-7.01304	11.3204	-0.969225	SWAP70	SWAP switching B-cell complex 70kDa subunit	23075			AB014540
211712_s_at	2.63e-08	1.77e-09	-7.00925	11.3053	-1.97947	ANXA9	annexin A9	8416			BC005830
206813_at	2.63e-08	1.77e-09	-7.00914	11.3049	-1.39396	CTF1	cardiotrophin 1	1489			NM_001330
200818_at	2.63e-08	1.77e-09	-7.00897	11.3042	-0.642749	ATP5O	ATP synthase, H+ transporting, mitochondrial F1 complex, O subunit	539			NM_001697
204417_at	2.66e-08	1.79e-09	-7.00645	11.2942	-1.12925	GALC	galactosylceramidase	2581			NM_000153
210959_s_at	2.7e-08	1.82e-09	-7.00175	11.2755	-1.34176	SRD5A1	steroid 5 alpha-reductase 1	6715			AF113128
221900_at	2.79e-08	1.88e-09	-6.99368	11.2434	-2.29419	COL8A2	collagen type VIII alpha 2 chain	1296			AI806793
209230_s_at	2.79e-08	1.88e-09	-6.99355	11.2429	-1.00635	NUPR1	nuclear protein 1, transcriptional regulator	26471			AF135266
202178_at	2.82e-08	1.91e-09	-6.98995	11.2286	-2.56082	PRKCZ	protein kinase C zeta	5590			NM_002744
201522_x_at	2.88e-08	1.95e-09	-6.98531	11.2101	-1.91091	SNURF///SNRPN	SNRPN upstream reading frame///small nuclear ribonucleoprotein polypeptide N	8926///6638			NM_003097
201843_s_at	2.9e-08	1.96e-09	-6.98312	11.2014	-1.88752	EFEMP1	EGF containing fibulin like extracellular matrix protein 1	2202
204255_s_at	2.9e-08	1.97e-09	-6.98266	11.1996	-2.13368	VDR	vitamin D (1,25- dihydroxyvitamin D3) receptor	7421
208407_s_at	2.92e-08	1.98e-09	-6.98069	11.1917	-0.829034	TMX2-CTNND1///CTNND1	TMX2-CTNND1 readthrough (NMD candidate)///catenin delta 1	100528016///1500			NM_001331
206080_at	2.94e-08	2e-09	-6.97899	11.185	-1.8596	PLCH2	phospholipase C eta 2	9651			NM_014638
220076_at	2.94e-08	2e-09	-6.97883	11.1843	-2.39805	ANKH	ANKH inorganic pyrophosphate transport regulator	56172			NM_054027
217118_s_at	2.97e-08	2.03e-09	-6.9754	11.1707	-1.20934	KIAA0930	KIAA0930	23313			AK025608
214235_at	3e-08	2.05e-09	-6.9727	11.1599	-2.15758	CYP3A5	cytochrome P450 family 3 subfamily A member 5	1577			X90579
203868_s_at	3.01e-08	2.05e-09	-6.9719	11.1568	-1.85873	VCAM1	vascular cell adhesion molecule 1	7412			NM_001078
214132_at	3.03e-08	2.07e-09	-6.97021	11.1501	-1.34086	ATP5C1	ATP synthase, H+ transporting, mitochondrial F1 complex, gamma polypeptide 1	509			BG232034
209373_at	3.06e-08	2.1e-09	-6.96697	11.1372	-1.47184	MALL	mal, T-cell differentiation protein like	7851			BC003179
204520_x_at	3.07e-08	2.1e-09	-6.96602	11.1334	-0.726039	BRD1	bromodomain containing 1	23774
201217_x_at	3.07e-08	2.11e-09	-6.96566	11.1319	-0.670942	SNORD83B///SNORD139///RPL3	small nucleolar RNA, C/D box 83B///small nucleolar RNA, C/D box 139///ribosomal protein L3	116938///116936///6122			NM_000967
219681_s_at	3.11e-08	2.14e-09	-6.96153	11.1156	-1.91739	RAB11FIP1	RAB11 family interacting protein 1	80223			NM_025151
217014_s_at	3.22e-08	2.22e-09	-6.95276	11.0807	-1.1896	AZGP1P1///AZGP1	alpha-2-glycoprotein 1, zinc-binding pseudogene 1///alpha-2-glycoprotein 1, zinc-binding	646282///563
219024_at	3.26e-08	2.25e-09	-6.94925	11.0667	-1.02048	PLEKHA1	pleckstrin homology domain containing A1	59338			NM_021622
211195_s_at	3.27e-08	2.26e-09	-6.94867	11.0644	-1.62044	TP63	tumor protein p63	8626			AF116771
209814_at	3.36e-08	2.33e-09	-6.94109	11.0343	-0.893302	ZNF330	zinc finger protein 330	27309			BC004421
217988_at	3.37e-08	2.33e-09	-6.94044	11.0317	-0.785693	CCNB1IP1	cyclin B1 interacting protein 1	57820			NM_021178
211203_s_at	3.37e-08	2.34e-09	-6.94005	11.0302	-1.72054	CNTN1	contactin 1	1272			U07820
203641_s_at	3.37e-08	2.34e-09	-6.93974	11.029	-0.890458	COBLL1	cordon-bleu WH2 repeat protein like 1	22837
212945_s_at	3.39e-08	2.35e-09	-6.93828	11.0231	-2.16455	MGA	MGA, MAX dimerization protein	23269			BE502432
213022_s_at	3.39e-08	2.36e-09	-6.93781	11.0213	-1.04583	UTRN	utrophin	7402			NM_007124
212319_at	3.49e-08	2.43e-09	-6.93067	10.9929	-0.894999	SGSM2	small G protein signaling modulator 2	9905			AB007857
202994_s_at	3.52e-08	2.45e-09	-6.92792	10.982	-2.98726	FBLN1	fibulin 1	2192
212695_at	3.52e-08	2.45e-09	-6.92787	10.9818	-1.96455	CRY2	cryptochrome circadian clock 2	1408			AB014558
213279_at	3.52e-08	2.46e-09	-6.92739	10.9799	-0.894775	DHRS1	dehydrogenase/reductase 1	115817			AL050217
202193_at	3.52e-08	2.46e-09	-6.92733	10.9796	-1.36604	LIMK2	LIM domain kinase 2	3985			NM_005569
208792_s_at	3.53e-08	2.47e-09	-6.92638	10.9759	-2.57984	CLU	clusterin	1191			M25915
212377_s_at	3.54e-08	2.48e-09	-6.92563	10.9729	-1.0101	NOTCH2	notch 2	4853			AU158495
213086_s_at	3.58e-08	2.51e-09	-6.92244	10.9602	-0.883842	CSNK1A1	casein kinase 1 alpha 1	1452			BF341845
221756_at	3.59e-08	2.51e-09	-6.92213	10.959	-1.40261	PIK3IP1	phosphoinositide-3-kinase interacting protein 1	113791			AL540260
206193_s_at	3.6e-08	2.52e-09	-6.92123	10.9554	-4.11644	CDSN	corneodesmosin	1041			NM_001264
219267_at	3.6e-08	2.52e-09	-6.92113	10.955	-1.86964	GLTP	glycolipid transfer protein	51228			NM_016433
205614_x_at	3.68e-08	2.58e-09	-6.9151	10.9311	-1.43833	MST1	macrophage stimulating 1	4485			NM_020998
217719_at	3.82e-08	2.69e-09	-6.90527	10.892	-0.795597	EIF3L	eukaryotic translation initiation factor 3 subunit L	51386			NM_016091
213707_s_at	3.84e-08	2.71e-09	-6.90378	10.8861	-2.438	DLX5	distal-less homeobox 5	1749			NM_005221
218854_at	3.96e-08	2.8e-09	-6.89554	10.8534	-1.45558	DSE	dermatan sulfate epimerase	29940			NM_013352
205486_at	3.97e-08	2.8e-09	-6.89528	10.8523	-0.667731	TESK2	testis-specific kinase 2	10420			NM_007170
204193_at	4.09e-08	2.89e-09	-6.88752	10.8216	-0.892212	CHKB	choline kinase beta	1120			NM_005198
31874_at	4.27e-08	3.03e-09	-6.87555	10.774	-0.854583	GAS2L1	growth arrest specific 2 like 1	10634			Y07846
212692_s_at	4.32e-08	3.07e-09	-6.87234	10.7613	-0.902804	LRBA	LPS responsive beige-like anchor protein	987			W60686
218546_at	4.39e-08	3.13e-09	-6.86787	10.7436	-2.30423	C1orf115	chromosome 1 open reading frame 115	79762			NM_024709
219764_at	4.39e-08	3.13e-09	-6.86782	10.7434	-2.27541	FZD10	frizzled class receptor 10	11211			NM_007197
214234_s_at	4.39e-08	3.13e-09	-6.86735	10.7415	-2.6327	CYP3A5	cytochrome P450 family 3 subfamily A member 5	1577			X90579
222290_at	4.46e-08	3.19e-09	-6.86292	10.7239	-2.39061	OR2A9P///OR2A20P	olfactory receptor family 2 subfamily A member 9 pseudogene///olfactory receptor family 2 subfamily A member 20 pseudogene	441295///401428
222288_at	4.5e-08	3.23e-09	-6.86021	10.7132	-1.58044
208153_s_at	4.65e-08	3.34e-09	-6.85162	10.6791	-1.97752	FAT2	FAT atypical cadherin 2	2196			NM_001447
201256_at	4.66e-08	3.35e-09	-6.851	10.6766	-0.537963	COX7A2L	cytochrome c oxidase subunit 7A2 like	9167			NM_004718
209605_at	4.69e-08	3.38e-09	-6.84874	10.6677	-2.06839	TST	thiosulfate sulfurtransferase	7263			D87292
205031_at	4.8e-08	3.46e-09	-6.84277	10.644	-1.3361	EFNB3	ephrin B3	1949			NM_001406
208483_x_at	4.82e-08	3.48e-09	-6.8417	10.6398	-2.23655	KRT33A	keratin 33A	3883			NM_004138
220945_x_at	4.85e-08	3.5e-09	-6.84004	10.6332	-2.23402	MANSC1	MANSC domain containing 1	54682			NM_018050
220149_at	4.85e-08	3.5e-09	-6.83985	10.6324	-1.30496	C2orf54	chromosome 2 open reading frame 54	79919			NM_024861
201562_s_at	4.88e-08	3.53e-09	-6.83782	10.6244	-1.36668	SORD	sorbitol dehydrogenase	6652			NM_003104
202005_at	4.99e-08	3.62e-09	-6.83161	10.5997	-1.47323	ST14	suppression of tumorigenicity 14	6768			NM_021978
212386_at	5.1e-08	3.7e-09	-6.82604	10.5777	-1.32919	TCF4	transcription factor 4	6925			BF592782
203797_at	5.14e-08	3.74e-09	-6.82359	10.5679	-1.41279	VSNL1	visinin like 1	7447			AF039555
215090_x_at	5.16e-08	3.75e-09	-6.82284	10.565	-0.626838	LOC440434	aminopeptidase puromycin sensitive pseudogene	440434
214355_x_at	5.17e-08	3.76e-09	-6.82217	10.5623	-0.886415	CTAGE8///CTAGE4///CTAGE9///CTAGE15	CTAGE family member 8///CTAGE family member 4///CTAGE family member 9///CTAGE family member 15	100142659///100128553///643854///441294
205595_at	5.17e-08	3.76e-09	-6.82195	10.5615	-2.87263	DSG3	desmoglein 3	1830			NM_001944
203992_s_at	5.35e-08	3.9e-09	-6.81292	10.5257	-1.7044	KDM6A	lysine demethylase 6A	7403			AF000992
220944_at	5.35e-08	3.91e-09	-6.81264	10.5246	-0.986427	PGLYRP4	peptidoglycan recognition protein 4	57115			NM_020393
200072_s_at	5.43e-08	3.97e-09	-6.80883	10.5094	-0.791421	HNRNPM	heterogeneous nuclear ribonucleoprotein M	4670	NA	NA	AF061832
204194_at	5.7e-08	4.18e-09	-6.79612	10.4591	-1.13647	BACH1	BTB domain and CNC homolog 1	571			NM_001186
205891_at	5.71e-08	4.19e-09	-6.79558	10.457	-1.50719	ADORA2B	adenosine A2b receptor	136			NM_000676
215773_x_at	5.72e-08	4.2e-09	-6.79457	10.453	-0.528172	PARP2	poly(ADP-ribose) polymerase 2	10038			AJ236912
218744_s_at	5.8e-08	4.27e-09	-6.79075	10.4378	-2.24147	PACSIN3	protein kinase C and casein kinase substrate in neurons 3	29763			NM_016223
212584_at	6.04e-08	4.46e-09	-6.78004	10.3954	-0.804923	AQR	aquarius intron-binding spliceosomal factor	9716			BG260519
212482_at	6.37e-08	4.71e-09	-6.76618	10.3405	-0.817779	RMND5A	required for meiotic nuclear division 5 homolog A	64795			BF671894
208609_s_at	6.37e-08	4.72e-09	-6.76592	10.3395	-2.28526	TNXB///TNXA	tenascin XB///tenascin XA (pseudogene)	7148///7146			NM_019105
215125_s_at	6.4e-08	4.74e-09	-6.76486	10.3353	-1.38029	UGT1A3///UGT1A1///UGT1A4///UGT1A9///UGT1A5///UGT1A6///UGT1A7///UGT1A8///UGT1A10	UDP glucuronosyltransferase family 1 member A3///UDP glucuronosyltransferase family 1 member A1///UDP glucuronosyltransferase family 1 member A4///UDP glucuronosyltransferase family 1 member A9///UDP glucuronosyltransferase family 1 member A5///UDP glucuronosyltransferase family 1 member A6///UDP glucuronosyltransferase family 1 member A7///UDP glucuronosyltransferase family 1 member A8///UDP glu…	54659///54658///54657///54600///54579///54578///54577///54576///54575			AV691323
221664_s_at	6.41e-08	4.75e-09	-6.76421	10.3327	-1.72166	F11R	F11 receptor	50848			AF154005
203238_s_at	6.43e-08	4.77e-09	-6.76301	10.328	-0.961178	NOTCH3	notch 3	4854			NM_000435
211939_x_at	6.45e-08	4.79e-09	-6.76218	10.3247	-0.620888	BTF3	basic transcription factor 3	689			X74070
202747_s_at	6.45e-08	4.79e-09	-6.76196	10.3238	-1.95202	ITM2A	integral membrane protein 2A	9452			NM_004867
217761_at	6.5e-08	4.83e-09	-6.75993	10.3158	-0.815713	ADI1	acireductone dioxygenase 1	55256			NM_018269
214599_at	6.52e-08	4.85e-09	-6.75894	10.3119	-2.89148	IVL	involucrin	3713			NM_005547
200888_s_at	6.82e-08	5.1e-09	-6.74683	10.2639	-0.654779	SNORA21///RPL23	small nucleolar RNA, H/ACA box 21///ribosomal protein L23	619505///9349			NM_000978
204989_s_at	6.83e-08	5.11e-09	-6.74607	10.2609	-2.23913	ITGB4	integrin subunit beta 4	3691			BF305661
202636_at	6.93e-08	5.19e-09	-6.7422	10.2456	-0.805015	RNF103	ring finger protein 103	7844			NM_005667
222043_at	7.19e-08	5.39e-09	-6.73279	10.2084	-2.30987	CLU	clusterin	1191
212327_at	7.21e-08	5.42e-09	-6.73158	10.2036	-1.9881	LIMCH1	LIM and calponin homology domains 1	22998			AK026815
202539_s_at	7.26e-08	5.47e-09	-6.72927	10.1945	-1.32133	HMGCR	3-hydroxy-3-methylglutaryl-CoA reductase	3156			AL518627
205668_at	7.28e-08	5.49e-09	-6.72856	10.1916	-2.96	LY75	lymphocyte antigen 75	4065			NM_002349
205987_at	7.37e-08	5.56e-09	-6.72511	10.178	-2.79964	CD1C	CD1c molecule	911			NM_001765
218434_s_at	7.43e-08	5.62e-09	-6.72276	10.1687	-1.53016	AACS	acetoacetyl-CoA synthetase	65985			NM_023928
203323_at	7.53e-08	5.71e-09	-6.71867	10.1525	-0.813521	CAV2	caveolin 2	858			BF197655
38691_s_at	7.68e-08	5.84e-09	-6.71295	10.1299	-1.14316	SFTPC	surfactant protein C	6440			J03553
206164_at	7.7e-08	5.86e-09	-6.71214	10.1267	-3.24669	CLCA2	chloride channel accessory 2	9635			NM_006536
210839_s_at	7.74e-08	5.89e-09	-6.71085	10.1216	-2.34661	ENPP2	ectonucleotide pyrophosphatase/phosphodiesterase 2	5168			D45421
221541_at	7.76e-08	5.92e-09	-6.70976	10.1173	-1.51112	CRISPLD2	cysteine rich secretory protein LCCL domain containing 2	83716			AL136861
213891_s_at	7.79e-08	5.95e-09	-6.70853	10.1125	-1.58858	TCF4	transcription factor 4	6925
218142_s_at	7.85e-08	5.99e-09	-6.70674	10.1054	-0.708707	CRBN	cereblon	51185			NM_016302
218148_at	7.85e-08	6e-09	-6.70646	10.1043	-0.781529	CENPT	centromere protein T	80152			NM_025082
208651_x_at	7.89e-08	6.03e-09	-6.70516	10.0991	-3.04402	CD24	CD24 molecule	100133941			M58664
204333_s_at	7.96e-08	6.09e-09	-6.70275	10.0896	-1.01023	AGA	aspartylglucosaminidase	175			NM_000027
205032_at	7.97e-08	6.1e-09	-6.70211	10.0871	-1.18817	ITGA2	integrin subunit alpha 2	3673			NM_002203
206723_s_at	8e-08	6.12e-09	-6.70123	10.0836	-1.19028	LPAR2	lysophosphatidic acid receptor 2	9170			AF011466
220638_s_at	8.07e-08	6.19e-09	-6.69864	10.0733	-2.20144	CBLC	Cbl proto-oncogene C	23624			NM_012116
209141_at	8.07e-08	6.2e-09	-6.69814	10.0714	-0.547826	UBE2G1	ubiquitin conjugating enzyme E2 G1	7326			AW299555
218380_at	8.1e-08	6.23e-09	-6.69709	10.0672	-1.41332	LOC728392	uncharacterized LOC728392	728392			NM_033004
218276_s_at	8.23e-08	6.33e-09	-6.69307	10.0513	-0.744242	SAV1	salvador family WW domain containing protein 1	60485			NM_021818
218261_at	8.29e-08	6.39e-09	-6.69073	10.0421	-1.64504	AP1M2	adaptor related protein complex 1 mu 2 subunit	10053			NM_005498
209108_at	8.34e-08	6.42e-09	-6.68933	10.0366	-0.803981	TSPAN6	tetraspanin 6	7105			AF053453
221527_s_at	8.39e-08	6.47e-09	-6.68763	10.0298	-1.13902	PARD3	par-3 family cell polarity regulator	56288			AF196185
219919_s_at	8.41e-08	6.49e-09	-6.6868	10.0265	-1.77999	SSH3	slingshot protein phosphatase 3	54961
200062_s_at	8.44e-08	6.52e-09	-6.68579	10.0226	-0.560067	RPL30	ribosomal protein L30	6156	NA	NA	L05095
202393_s_at	8.45e-08	6.53e-09	-6.68544	10.0212	-0.91915	KLF10	Kruppel like factor 10	7071			NM_005655
208096_s_at	8.51e-08	6.58e-09	-6.68332	10.0128	-1.61141	COL21A1	collagen type XXI alpha 1 chain	81578			NM_030820
220117_at	8.52e-08	6.59e-09	-6.68286	10.011	-1.98119	ZNF385D	zinc finger protein 385D	79750			NM_024697
218826_at	8.52e-08	6.6e-09	-6.68277	10.0106	-1.093	SLC35F2	solute carrier family 35 member F2	54733			NM_017515
200674_s_at	8.64e-08	6.7e-09	-6.67899	9.99569	-0.626177	RPL32	ribosomal protein L32	6161			NM_000994
201054_at	8.78e-08	6.83e-09	-6.67415	9.97659	-0.811489	HNRNPA0	heterogeneous nuclear ribonucleoprotein A0	10949			BE966599
209867_s_at	8.85e-08	6.89e-09	-6.6719	9.96767	-2.25467	ADGRL3	adhesion G protein-coupled receptor L3	23284			AF307080
219496_at	8.9e-08	6.93e-09	-6.67043	9.96187	-1.05707	SOWAHC	sosondowah ankyrin repeat domain family member C	65124			NM_023016
213796_at	9.07e-08	7.07e-09	-6.66537	9.94188	-5.65098	SPRR1A	small proline rich protein 1A	6698
209265_s_at	9.29e-08	7.25e-09	-6.65934	9.91809	-0.677354	METTL3	methyltransferase like 3	56339			BC001650
208771_s_at	9.66e-08	7.55e-09	-6.64925	9.87824	-1.03442	LOC101928830///LTA4H	uncharacterized LOC101928830///leukotriene A4 hydrolase	101928830///4048			J02959
211671_s_at	9.66e-08	7.55e-09	-6.64906	9.87748	-0.626967	NR3C1	nuclear receptor subfamily 3 group C member 1	2908			U01351
202592_at	9.69e-08	7.58e-09	-6.6481	9.8737	-1.12759	BLOC1S1	biogenesis of lysosomal organelles complex 1 subunit 1	2647			NM_001487
206142_at	9.75e-08	7.64e-09	-6.64632	9.86669	-2.17152	ZNF135	zinc finger protein 135	7694			NM_003436
212933_x_at	9.78e-08	7.67e-09	-6.64533	9.86277	-0.775397	SNORD68///RPL13	small nucleolar RNA, C/D box 68///ribosomal protein L13	606500///6137
203423_at	9.78e-08	7.68e-09	-6.64508	9.86177	-1.94329	RBP1	retinol binding protein 1	5947			NM_002899
219529_at	9.88e-08	7.76e-09	-6.64232	9.85088	-3.70279	CLIC3	chloride intracellular channel 3	9022			NM_004669
200858_s_at	1e-07	7.88e-09	-6.63851	9.83585	-0.685822	SNORD38B///SNORD55///RPS8	small nucleolar RNA, C/D box 38B///small nucleolar RNA, C/D box 55///ribosomal protein S8	94163///26811///6202			NM_001012
213817_at	1.01e-07	7.92e-09	-6.63723	9.83078	-2.85623	IRAK3	interleukin 1 receptor associated kinase 3	11213			AL049435
221922_at	1.02e-07	8.01e-09	-6.63444	9.81979	-1.26499	GPSM2	G-protein signaling modulator 2	29899
201413_at	1.03e-07	8.14e-09	-6.63055	9.80445	-0.66204	HSD17B4	hydroxysteroid 17-beta dehydrogenase 4	3295			NM_000414
206008_at	1.04e-07	8.17e-09	-6.62944	9.80007	-2.82023	TGM1	transglutaminase 1	7051			NM_000359
217779_s_at	1.04e-07	8.22e-09	-6.6281	9.79478	-0.693699	PNRC2	proline rich nuclear receptor coactivator 2	55629			NM_017761
204203_at	1.04e-07	8.26e-09	-6.62682	9.78973	-1.08151	CEBPG	CCAAT/enhancer binding protein gamma	1054			NM_001806
213356_x_at	1.06e-07	8.39e-09	-6.62295	9.77446	-0.63392	HNRNPA1P33///HNRNPA1P10///HNRNPA1L2///HNRNPA1	heterogeneous nuclear ribonucleoprotein A1 pseudogene 33///heterogeneous nuclear ribonucleoprotein A1 pseudogene 10///heterogeneous nuclear ribonucleoprotein A1-like 2///heterogeneous nuclear ribonucleoprotein A1	728643///664709///144983///3178			AL568186
212390_at	1.06e-07	8.43e-09	-6.62186	9.77015	-1.90288	LOC101930416///LOC101929792///LOC100996724///PDE4DIP	myomegalin-like///uncharacterized LOC101929792///phosphodiesterase 4D interacting protein-like///phosphodiesterase 4D interacting protein	101930416///101929792///100996724///9659			AB007923
214218_s_at	1.07e-07	8.47e-09	-6.62064	9.76535	-2.79098	XIST	X inactive specific transcript (non-protein coding)	7503			AV699347
219600_s_at	1.08e-07	8.6e-09	-6.61675	9.75001	-0.953903	TMEM50B	transmembrane protein 50B	757			NM_006134
208735_s_at	1.08e-07	8.62e-09	-6.61619	9.74777	-0.738595	CTDSP2	CTD small phosphatase 2	10106			AF022231
210735_s_at	1.1e-07	8.73e-09	-6.6131	9.7356	-1.41887	CA12	carbonic anhydrase 12	771			BC000278
202315_s_at	1.1e-07	8.76e-09	-6.61218	9.73198	-0.720391	BCR	BCR, RhoGEF and GTPase activating protein	613			NM_004327
218041_x_at	1.11e-07	8.83e-09	-6.61018	9.72408	-1.18015	SLC38A2	solute carrier family 38 member 2	54407			NM_018976
213645_at	1.12e-07	8.95e-09	-6.60692	9.71124	-1.19334	ENOSF1	enolase superfamily member 1	55556			AF305057
205981_s_at	1.12e-07	8.98e-09	-6.60609	9.70796	-0.888273	ING2	inhibitor of growth family member 2	3622			NM_001564
213385_at	1.13e-07	9.02e-09	-6.60477	9.70277	-1.87172	CHN2	chimerin 2	1124
201146_at	1.13e-07	9.06e-09	-6.60374	9.69869	-0.941446	NFE2L2	nuclear factor, erythroid 2 like 2	4780			NM_006164
207708_at	1.14e-07	9.14e-09	-6.60163	9.69036	-1.01493	ALOXE3	arachidonate lipoxygenase 3	59344			NM_021628
218357_s_at	1.15e-07	9.19e-09	-6.60018	9.68467	-0.734443	TIMM8B	translocase of inner mitochondrial membrane 8 homolog B	26521			NM_012459
207585_s_at	1.15e-07	9.22e-09	-6.59954	9.68214	-0.668646	RPL36AL	ribosomal protein L36a like	6166			NM_001001
210113_s_at	1.16e-07	9.28e-09	-6.59792	9.67575	-2.14761	NLRP1	NLR family pyrin domain containing 1	22861			AF310105
202074_s_at	1.19e-07	9.56e-09	-6.59048	9.6464	-0.641269	OPTN	optineurin	10133			NM_021980
219970_at	1.19e-07	9.58e-09	-6.59002	9.64462	-2.38524	GIPC2	GIPC PDZ domain containing family member 2	54810			NM_017655
208697_s_at	1.2e-07	9.66e-09	-6.58791	9.6363	-0.632182	EIF3E	eukaryotic translation initiation factor 3 subunit E	3646			BC000734
210346_s_at	1.2e-07	9.7e-09	-6.58692	9.63237	-1.03367	CLK4	CDC like kinase 4	57396			AF212224
211715_s_at	1.21e-07	9.73e-09	-6.58608	9.6291	-0.999025	BDH1	3-hydroxybutyrate dehydrogenase, type 1	622			BC005844
215416_s_at	1.22e-07	9.81e-09	-6.58391	9.62054	-0.734894	STOML2	stomatin like 2	30968
208692_at	1.22e-07	9.85e-09	-6.58288	9.61645	-0.628182	RPS3	ribosomal protein S3	6188			U14990
202920_at	1.22e-07	9.89e-09	-6.58191	9.61267	-1.23199	ANK2	ankyrin 2, neuronal	287			BF726212
211732_x_at	1.25e-07	1.01e-08	-6.57552	9.58746	-2.25712	HNMT	histamine N-methyltransferase	3176			BC005907
219197_s_at	1.28e-07	1.04e-08	-6.57028	9.56684	-2.56337	SCUBE2	signal peptide, CUB domain and EGF like domain containing 2	57758			AI424243
219560_at	1.29e-07	1.05e-08	-6.56823	9.55876	-1.38704	C22orf29///GNB1L	chromosome 22 open reading frame 29///G protein subunit beta 1 like	79680///54584			NM_024627
207992_s_at	1.31e-07	1.07e-08	-6.56349	9.54008	-1.14911	AMPD3	adenosine monophosphate deaminase 3	272			NM_000480
207542_s_at	1.31e-07	1.07e-08	-6.56309	9.53851	-1.72889	AQP1	aquaporin 1 (Colton blood group)	358
202514_at	1.31e-07	1.07e-08	-6.5627	9.53696	-1.11949	DLG1	discs large MAGUK scaffold protein 1	1739			AW139131
216060_s_at	1.32e-07	1.07e-08	-6.56131	9.53152	-1.21187	DAAM1	dishevelled associated activator of morphogenesis 1	23002
203747_at	1.33e-07	1.08e-08	-6.56013	9.52685	-2.60106	AQP3	aquaporin 3 (Gill blood group)	360			NM_004925
206637_at	1.33e-07	1.09e-08	-6.5587	9.52124	-2.16853	P2RY14	purinergic receptor P2Y14	9934			NM_014879
205150_s_at	1.34e-07	1.09e-08	-6.55784	9.51784	-1.08049	TRIL	TLR4 interactor with leucine rich repeats	9865			AV724192
47773_at	1.37e-07	1.12e-08	-6.5513	9.49209	-0.657333	FBXO42	F-box protein 42	54455			AA836114
218675_at	1.37e-07	1.13e-08	-6.54968	9.4857	-2.10436	SLC22A17	solute carrier family 22 member 17	51310			NM_020372
211542_x_at	1.38e-07	1.13e-08	-6.54785	9.4785	-0.626137	RPS10	ribosomal protein S10	6204			BC004334
209106_at	1.42e-07	1.17e-08	-6.54026	9.44862	-0.818837	NCOA1	nuclear receptor coactivator 1	8648			BF576458
218951_s_at	1.42e-07	1.17e-08	-6.53984	9.44696	-1.52416	PLCXD1	phosphatidylinositol specific phospholipase C X domain containing 1	55344			NM_018390
203057_s_at	1.44e-07	1.18e-08	-6.53769	9.43853	-0.633941	PRDM2	PR/SET domain 2	7799			AV724783
218449_at	1.45e-07	1.2e-08	-6.53436	9.42539	-0.676477	UFSP2	UFM1 specific peptidase 2	55325			NM_018359
201032_at	1.47e-07	1.21e-08	-6.53087	9.41165	-0.541789	BLCAP	bladder cancer associated protein	10904			NM_006698
218764_at	1.48e-07	1.22e-08	-6.52971	9.40712	-1.80548	PRKCH	protein kinase C eta	5583			NM_006255
205287_s_at	1.48e-07	1.22e-08	-6.52879	9.40347	-2.13105	TFAP2C	transcription factor AP-2 gamma	7022			NM_003222
208866_at	1.49e-07	1.23e-08	-6.52777	9.39948	-0.991382	CSNK1A1	casein kinase 1 alpha 1	1452			BF510713
214086_s_at	1.51e-07	1.25e-08	-6.52375	9.38367	-0.805504	PARP2	poly(ADP-ribose) polymerase 2	10038
204058_at	1.51e-07	1.25e-08	-6.52363	9.3832	-2.26641	ME1	malic enzyme 1	4199
201681_s_at	1.51e-07	1.25e-08	-6.52358	9.38297	-1.14712	DLG5	discs large MAGUK scaffold protein 5	9231			AB011155
214238_at	1.52e-07	1.26e-08	-6.52153	9.37491	-1.31348	GDF7	growth differentiation factor 7	151449	Clone DT1P1B6 mRNA, CAG repeat region	Hs.596282	AI093572
220933_s_at	1.52e-07	1.26e-08	-6.52103	9.37297	-0.772344	ZCCHC6	zinc finger CCHC-type containing 6	79670			NM_024617
203427_at	1.55e-07	1.29e-08	-6.51669	9.3559	-1.16759	ASF1A	anti-silencing function 1A histone chaperone	25842			NM_014034
203637_s_at	1.55e-07	1.29e-08	-6.51611	9.35359	-1.86065	MID1	midline 1	4281			NM_000381
204798_at	1.56e-07	1.3e-08	-6.5137	9.34411	-1.08399	MYB	MYB proto-oncogene, transcription factor	4602			NM_005375
217795_s_at	1.57e-07	1.3e-08	-6.51321	9.3422	-0.595895	TMEM43	transmembrane protein 43	79188			W74580
200074_s_at	1.58e-07	1.31e-08	-6.51136	9.33491	-0.559328	RPL14	ribosomal protein L14	9045	NA	NA	U16738
214203_s_at	1.58e-07	1.32e-08	-6.50966	9.32826	-1.16935	LOC102724788///PRODH	proline dehydrogenase 1, mitochondrial///proline dehydrogenase 1	102724788///5625			AA074145
205157_s_at	1.64e-07	1.37e-08	-6.49999	9.29021	-4.80055	KRT17///JUP	keratin 17///junction plakoglobin	3872///3728			NM_000422
218432_at	1.66e-07	1.39e-08	-6.49694	9.27823	-0.839083	FBXO3	F-box protein 3	26273			NM_012175
201995_at	1.66e-07	1.4e-08	-6.49598	9.27446	-0.584052	EXT1	exostosin glycosyltransferase 1	2131			NM_000127
218876_at	1.7e-07	1.43e-08	-6.4906	9.2533	-2.80037	TPPP3	tubulin polymerization promoting protein family member 3	51673			NM_016140
213556_at	1.7e-07	1.43e-08	-6.49005	9.25115	-1.91159	PINLYP	phospholipase A2 inhibitor and LY6/PLAUR domain containing	390940
204578_at	1.71e-07	1.44e-08	-6.4886	9.24547	-1.88008	PPIP5K1	diphosphoinositol pentakisphosphate kinase 1	9677			NM_014659
219073_s_at	1.71e-07	1.44e-08	-6.48814	9.24363	-2.0132	OSBPL10	oxysterol binding protein like 10	114884			NM_017784
216641_s_at	1.73e-07	1.46e-08	-6.48501	9.23134	-2.15345	LAD1	ladinin 1	3898			U58994
209690_s_at	1.75e-07	1.47e-08	-6.48263	9.22201	-1.78743	DOK4	docking protein 4	55715
212455_at	1.77e-07	1.5e-08	-6.47887	9.20721	-0.599762	YTHDC1	YTH domain containing 1	91746			N36997
214246_x_at	1.8e-07	1.52e-08	-6.47407	9.18836	-0.775856	MINK1	misshapen like kinase 1	50488			AI859060
214243_s_at	1.81e-07	1.53e-08	-6.47257	9.18248	-1.48063	SERHL2///SERHL	serine hydrolase-like 2///serine hydrolase-like (pseudogene)	253190///94009			AL450314
218780_at	1.82e-07	1.54e-08	-6.47166	9.1789	-1.02581	HOOK2	hook microtubule tethering protein 2	29911			NM_013312
206562_s_at	1.82e-07	1.54e-08	-6.47088	9.17585	-0.831693	CSNK1A1	casein kinase 1 alpha 1	1452			NM_001892
204725_s_at	1.83e-07	1.55e-08	-6.46976	9.17143	-1.03247	NCK1	NCK adaptor protein 1	4690			NM_006153
213508_at	1.84e-07	1.56e-08	-6.46777	9.16362	-0.805767	SPTSSA	serine palmitoyltransferase small subunit A	171546			AA142942
200813_s_at	1.85e-07	1.57e-08	-6.4669	9.16019	-0.941302	PAFAH1B1	platelet activating factor acetylhydrolase 1b regulatory subunit 1	5048			BE256969
204517_at	1.86e-07	1.58e-08	-6.46458	9.15108	-1.42483	PPIC	peptidylprolyl isomerase C	5480			BE962749
205076_s_at	1.88e-07	1.6e-08	-6.46275	9.14392	-0.73028	MTMR11	myotubularin related protein 11	10903
214734_at	1.91e-07	1.62e-08	-6.45825	9.12624	-1.47733	EXPH5	exophilin 5	23086			AB014524
212196_at	1.94e-07	1.65e-08	-6.45449	9.1115	-1.31585	IL6ST	interleukin 6 signal transducer	3572			AW242916
1320_at	1.94e-07	1.66e-08	-6.45304	9.1058	-1.69267	PTPN21	protein tyrosine phosphatase, non-receptor type 21	11099	NA	NA	X79510
219511_s_at	1.95e-07	1.67e-08	-6.45168	9.10044	-1.41963	SNCAIP	synuclein alpha interacting protein	9627			NM_005460
204424_s_at	1.96e-07	1.67e-08	-6.45129	9.09891	-1.75889	LMO3	LIM domain only 3	55885			AL050152
208804_s_at	1.97e-07	1.68e-08	-6.44984	9.09322	-0.637214	SRSF6	serine and arginine rich splicing factor 6	6431
221766_s_at	1.97e-07	1.68e-08	-6.44973	9.09278	-1.42668	FAM46A	family with sequence similarity 46 member A	55603			AW246673
210239_at	1.98e-07	1.69e-08	-6.44764	9.0846	-1.23036	IRX5	iroquois homeobox 5	10265			U90304
203549_s_at	2.03e-07	1.74e-08	-6.44037	9.05606	-1.54783	LPL	lipoprotein lipase	4023			NM_000237
213994_s_at	2.06e-07	1.77e-08	-6.43704	9.04298	-2.34172	SPON1	spondin 1	10418			AI885290
218259_at	2.07e-07	1.77e-08	-6.43607	9.0392	-0.734198	MKL2	MKL1/myocardin like 2	57496			NM_014048
201845_s_at	2.13e-07	1.83e-08	-6.42834	9.00886	-0.656919	RYBP	RING1 and YY1 binding protein	23429			AB029551
213198_at	2.15e-07	1.85e-08	-6.4253	8.99696	-0.641424	ACVR1B	activin A receptor type 1B	91			AL117643
208596_s_at	2.16e-07	1.86e-08	-6.42467	8.99448	-1.47385	UGT1A3///UGT1A1///UGT1A4///UGT1A9///UGT1A5///UGT1A6///UGT1A7///UGT1A8///UGT1A10	UDP glucuronosyltransferase family 1 member A3///UDP glucuronosyltransferase family 1 member A1///UDP glucuronosyltransferase family 1 member A4///UDP glucuronosyltransferase family 1 member A9///UDP glucuronosyltransferase family 1 member A5///UDP glucuronosyltransferase family 1 member A6///UDP glucuronosyltransferase family 1 member A7///UDP glucuronosyltransferase family 1 member A8///UDP glu…	54659///54658///54657///54600///54579///54578///54577///54576///54575			NM_019093
220086_at	2.16e-07	1.86e-08	-6.42375	8.99087	-1.4168	IKZF5	IKAROS family zinc finger 5	64376			NR_073475
209897_s_at	2.18e-07	1.88e-08	-6.42162	8.9825	-0.981792	SLIT2	slit guidance ligand 2	9353			AF055585
201302_at	2.19e-07	1.89e-08	-6.4207	8.97891	-0.668783	ANXA4	annexin A4	307			NM_001153
209872_s_at	2.21e-07	1.91e-08	-6.41749	8.96633	-2.3326	PKP3	plakophilin 3	11187
216064_s_at	2.27e-07	1.96e-08	-6.41124	8.94181	-1.13435	AGA	aspartylglucosaminidase	175			W27131
211937_at	2.27e-07	1.97e-08	-6.41024	8.93788	-0.761089	EIF4B	eukaryotic translation initiation factor 4B	1975			NM_001417
217675_at	2.32e-07	2.01e-08	-6.40513	8.91787	-1.39398	ZBTB7C	zinc finger and BTB domain containing 7C	201501			BE734331
219368_at	2.34e-07	2.03e-08	-6.40192	8.90528	-2.15513	NAP1L2	nucleosome assembly protein 1 like 2	4674			NM_021963
206100_at	2.35e-07	2.04e-08	-6.40103	8.9018	-1.93456	CPM	carboxypeptidase M	1368			NM_001874
209027_s_at	2.39e-07	2.08e-08	-6.39641	8.88369	-1.30256	ABI1	abl interactor 1	10006			BF673013
220322_at	2.4e-07	2.09e-08	-6.39475	8.87719	-1.88482	IL36G	interleukin 36, gamma	56300			NM_019618
209678_s_at	2.42e-07	2.11e-08	-6.39292	8.87002	-0.724822	PRKCI	protein kinase C iota	5584			L18964
204072_s_at	2.47e-07	2.16e-08	-6.38733	8.84814	-1.4891	FRY	FRY microtubule binding protein	10129			NM_023037
217496_s_at	2.47e-07	2.16e-08	-6.38723	8.84772	-0.932134	IDE	insulin degrading enzyme	3416
206082_at	2.49e-07	2.18e-08	-6.38423	8.83599	-2.59246	HCP5	HLA complex P5 (non-protein coding)	10866			NR_040662
207291_at	2.65e-07	2.33e-08	-6.36772	8.77132	-1.52655	PRRG4	proline rich and Gla domain 4	79056			NM_024081
201041_s_at	2.66e-07	2.34e-08	-6.36685	8.76794	-2.11175	DUSP1	dual specificity phosphatase 1	1843			NM_004417
213080_x_at	2.68e-07	2.36e-08	-6.36504	8.76083	-0.835771	RPL5///SNORD21	ribosomal protein L5///small nucleolar RNA, C/D box 21	6125///6083			BF214492
221812_at	2.69e-07	2.37e-08	-6.36372	8.75569	-1.73403	FBXO42	F-box protein 42	54455			AK025059
219825_at	2.78e-07	2.46e-08	-6.35427	8.71868	-2.67726	CYP26B1	cytochrome P450 family 26 subfamily B member 1	56603			NM_019885
202723_s_at	2.81e-07	2.49e-08	-6.3514	8.70748	-0.793056	FOXO1	forkhead box O1	2308
213626_at	2.86e-07	2.53e-08	-6.34727	8.69132	-1.03013	CBR4	carbonyl reductase 4	84869			AL049442
213128_s_at	2.88e-07	2.56e-08	-6.34467	8.68114	-0.959092	UBE3A	ubiquitin protein ligase E3A	7337			AA527499
202263_at	2.88e-07	2.56e-08	-6.34458	8.68078	-0.790718	CYB5R1	cytochrome b5 reductase 1	51706			NM_016243
204341_at	2.91e-07	2.58e-08	-6.34201	8.67075	-0.901556	TRIM16	tripartite motif containing 16	10626			NM_006470
219304_s_at	2.93e-07	2.6e-08	-6.34006	8.66313	-0.925839	PDGFD	platelet derived growth factor D	80310			NM_025208
201180_s_at	3.01e-07	2.68e-08	-6.33291	8.63514	-0.794129	GNAI3	G protein subunit alpha i3	2773			J03198
211843_x_at	3.05e-07	2.72e-08	-6.32909	8.62022	-1.75707	CYP3A7-CYP3A51P	CYP3A7-CYP3A51P readthrough	100861540			AF315325
219689_at	3.07e-07	2.74e-08	-6.32733	8.61335	-1.45382	SEMA3G	semaphorin 3G	56920			NM_020163
203528_at	3.09e-07	2.76e-08	-6.32557	8.60648	-2.45735	SEMA4D	semaphorin 4D	10507			NM_006378
218424_s_at	3.15e-07	2.82e-08	-6.32012	8.58517	-1.51328	STEAP3	STEAP3 metalloreductase	55240			NM_018234
204870_s_at	3.17e-07	2.84e-08	-6.31801	8.57693	-2.47146	PCSK2	proprotein convertase subtilisin/kexin type 2	5126			NM_002594
220262_s_at	3.19e-07	2.87e-08	-6.31587	8.56856	-1.52669	DLK2	delta like non-canonical Notch ligand 2	65989			NM_023932
218589_at	3.25e-07	2.92e-08	-6.31125	8.5505	-0.957709	LPAR6	lysophosphatidic acid receptor 6	10161			NM_005767
204752_x_at	3.27e-07	2.94e-08	-6.30955	8.54388	-0.483693	PARP2	poly(ADP-ribose) polymerase 2	10038			NM_005484
200951_s_at	3.27e-07	2.95e-08	-6.30913	8.54221	-2.22003	CCND2	cyclin D2	894
205036_at	3.33e-07	3e-08	-6.3046	8.52454	-0.683386	LSM6	LSM6 homolog, U6 small nuclear RNA and mRNA degradation associated	11157			NM_007080
218035_s_at	3.33e-07	3.01e-08	-6.30383	8.52153	-1.65447	RBM47	RNA binding motif protein 47	54502			NM_019027
200016_x_at	3.34e-07	3.02e-08	-6.30324	8.51921	-0.558241	HNRNPA1P10///HNRNPA1	heterogeneous nuclear ribonucleoprotein A1 pseudogene 10///heterogeneous nuclear ribonucleoprotein A1	664709///3178	NA	NA	NM_002136
202489_s_at	3.4e-07	3.07e-08	-6.29871	8.50152	-2.01913	FXYD3	FXYD domain containing ion transport regulator 3	5349			BC005238
215034_s_at	3.45e-07	3.12e-08	-6.29484	8.48641	-1.67132	TM4SF1	transmembrane 4 L six family member 1	4071
212095_s_at	3.49e-07	3.16e-08	-6.29125	8.47241	-0.800331	MTUS1	microtubule associated tumor suppressor 1	57509
201124_at	3.5e-07	3.17e-08	-6.29052	8.46953	-0.972499	ITGB5	integrin subunit beta 5	3693			AL048423
212985_at	3.58e-07	3.26e-08	-6.28404	8.44424	-0.652342	APBB2	amyloid beta precursor protein binding family B member 2	323			BF115739
207861_at	3.58e-07	3.26e-08	-6.28335	8.44155	-1.75111	CCL22	C-C motif chemokine ligand 22	6367			NM_002990
204607_at	3.6e-07	3.28e-08	-6.28214	8.43685	-1.71224	HMGCS2	3-hydroxy-3-methylglutaryl-CoA synthase 2	3158			NM_005518
218680_x_at	3.61e-07	3.29e-08	-6.28121	8.43319	-0.812156	SERF2-C15ORF63///MIR1282///HYPK///SERF2	SERF2-C15orf63 readthrough///microRNA 1282///huntingtin interacting protein K///small EDRK-rich factor 2	100529067///100302254///25764///10169			NM_016400
212823_s_at	3.68e-07	3.37e-08	-6.27565	8.4115	-1.64522	PLEKHG3	pleckstrin homology and RhoGEF domain containing G3	26030
213280_at	3.75e-07	3.43e-08	-6.27103	8.39349	-1.95471	RAP1GAP2	RAP1 GTPase activating protein 2	23108			AK000478
222041_at	3.76e-07	3.44e-08	-6.2704	8.39102	-0.74861	OVCA2///DPH1	ovarian tumor suppressor candidate 2///diphthamide biosynthesis 1	124641///1801			BG235929
210132_at	3.8e-07	3.48e-08	-6.26745	8.37954	-2.09503	EFNA3	ephrin A3	1944			AW189015
215516_at	3.87e-07	3.55e-08	-6.2621	8.35867	-2.09294	LAMB4	laminin subunit beta 4	22798
212236_x_at	3.89e-07	3.57e-08	-6.26107	8.35465	-3.12339	KRT17///JUP	keratin 17///junction plakoglobin	3872///3728			Z19574
218935_at	3.97e-07	3.65e-08	-6.25538	8.33245	-2.65437	EHD3	EH domain containing 3	30845			NM_014600
206094_x_at	3.97e-07	3.65e-08	-6.25527	8.33204	-1.01715	UGT1A3///UGT1A1///UGT1A4///UGT1A9///UGT1A5///UGT1A6///UGT1A7///UGT1A8///UGT1A10	UDP glucuronosyltransferase family 1 member A3///UDP glucuronosyltransferase family 1 member A1///UDP glucuronosyltransferase family 1 member A4///UDP glucuronosyltransferase family 1 member A9///UDP glucuronosyltransferase family 1 member A5///UDP glucuronosyltransferase family 1 member A6///UDP glucuronosyltransferase family 1 member A7///UDP glucuronosyltransferase family 1 member A8///UDP glu…	54659///54658///54657///54600///54579///54578///54577///54576///54575			NM_001072
209794_at	3.98e-07	3.66e-08	-6.25469	8.32975	-1.03373	SRGAP3	SLIT-ROBO Rho GTPase activating protein 3	9901			AB007871
210085_s_at	3.98e-07	3.66e-08	-6.25457	8.32929	-2.00815	ANXA9	annexin A9	8416			AF230929
202688_at	3.98e-07	3.67e-08	-6.25404	8.32725	-2.28905	TNFSF10	tumor necrosis factor superfamily member 10	8743			NM_003810
209540_at	4e-07	3.69e-08	-6.25273	8.32213	-2.36016	IGF1	insulin like growth factor 1	3479			AU144912
221702_s_at	4e-07	3.69e-08	-6.25248	8.32116	-0.602433	TM2D3	TM2 domain containing 3	80213			AF353992
203706_s_at	4.08e-07	3.76e-08	-6.24759	8.30207	-1.07123	FZD7	frizzled class receptor 7	8324			NM_003507
203409_at	4.09e-07	3.78e-08	-6.24665	8.29843	-0.816106	DDB2	damage specific DNA binding protein 2	1643			NM_000107
209719_x_at	4.14e-07	3.82e-08	-6.24363	8.28664	-2.57726	SERPINB3	serpin family B member 3	6317			U19556
209394_at	4.14e-07	3.83e-08	-6.24307	8.28448	-0.684134	ASMTL	acetylserotonin O-methyltransferase-like	8623			BC002508
214807_at	4.15e-07	3.84e-08	-6.24272	8.2831	-1.10983	PLXDC2	plexin domain containing 2	84898
218932_at	4.17e-07	3.86e-08	-6.24124	8.27734	-0.565877	ZNHIT6	zinc finger HIT-type containing 6	54680			NM_017953
204508_s_at	4.17e-07	3.87e-08	-6.24087	8.27589	-2.83583	CA12	carbonic anhydrase 12	771			BC001012
212830_at	4.19e-07	3.89e-08	-6.23948	8.27048	-0.703404	MEGF9	multiple EGF like domains 9	1955			W68084
211538_s_at	4.25e-07	3.95e-08	-6.23551	8.255	-2.23622	HSPA2	heat shock protein family A (Hsp70) member 2	3306			U56725
214980_at	4.31e-07	4.01e-08	-6.23186	8.2408	-1.91568	UBE3A	ubiquitin protein ligase E3A	7337			AF037219
201581_at	4.33e-07	4.02e-08	-6.23092	8.23714	-1.68998	TMX4	thioredoxin related transmembrane protein 4	56255			BF572868
211056_s_at	4.36e-07	4.06e-08	-6.22887	8.22916	-1.82291	SRD5A1	steroid 5 alpha-reductase 1	6715			BC006373
201121_s_at	4.39e-07	4.09e-08	-6.22661	8.22034	-0.573342	PGRMC1	progesterone receptor membrane component 1	10857			NM_006667
214433_s_at	4.42e-07	4.12e-08	-6.22458	8.21245	-1.21012	SELENBP1	selenium binding protein 1	8991			NM_003944
220960_x_at	4.43e-07	4.13e-08	-6.22405	8.21038	-0.613753	RPL22	ribosomal protein L22	6146			NM_000983
220924_s_at	4.43e-07	4.14e-08	-6.22386	8.20964	-1.13554	SLC38A2	solute carrier family 38 member 2	54407			NM_018976
202770_s_at	4.43e-07	4.14e-08	-6.22377	8.20929	-0.855271	CCNG2	cyclin G2	901			NM_004354
218194_at	4.54e-07	4.25e-08	-6.21721	8.18373	-0.720177	REXO2	RNA exonuclease 2	25996			NM_015523
205968_at	4.54e-07	4.25e-08	-6.21715	8.18352	-1.55438	KCNS3	potassium voltage-gated channel modifier subfamily S member 3	3790			NM_002252
221487_s_at	4.56e-07	4.27e-08	-6.21595	8.17885	-1.90264	ENSA	endosulfine alpha	2029			AF157510
218789_s_at	4.6e-07	4.31e-08	-6.21359	8.16965	-0.844722	C11orf71	chromosome 11 open reading frame 71	54494			NM_019021
216512_s_at	4.63e-07	4.34e-08	-6.21157	8.16179	-3.77332	DCT	dopachrome tautomerase	1638
202316_x_at	4.65e-07	4.36e-08	-6.21044	8.15738	-2.38042	UBE4B	ubiquitination factor E4B	10277
209631_s_at	4.65e-07	4.37e-08	-6.21005	8.15587	-2.03693	SEL1L2///GPR37	SEL1L2 ERAD E3 ligase adaptor subunit///G protein-coupled receptor 37	80343///2861			U87460
213066_at	4.67e-07	4.39e-08	-6.20894	8.15157	-1.13429	RUSC2	RUN and SH3 domain containing 2	9853			AB002373
206832_s_at	4.71e-07	4.43e-08	-6.20658	8.14237	-1.87675	SEMA3F	semaphorin 3F	6405			NM_004186
218651_s_at	4.73e-07	4.44e-08	-6.2058	8.13932	-1.75686	LARP6	La ribonucleoprotein domain family member 6	55323			NM_018357
214280_x_at	4.74e-07	4.46e-08	-6.20475	8.13526	-0.551725	HNRNPA1	heterogeneous nuclear ribonucleoprotein A1	3178			X79536
216095_x_at	4.75e-07	4.47e-08	-6.2041	8.13273	-0.718825	MTMR1	myotubularin related protein 1	8776			AF057354
203552_at	4.88e-07	4.61e-08	-6.19669	8.1039	-0.956047	MAP4K5	mitogen-activated protein kinase kinase kinase kinase 5	11183			AW298170
204005_s_at	4.89e-07	4.62e-08	-6.19614	8.10176	-2.03384	PAWR	pro-apoptotic WT1 regulator	5074			NM_002583
212538_at	4.98e-07	4.71e-08	-6.19116	8.08236	-1.36032	DOCK9	dedicator of cytokinesis 9	23348			AL576253
221493_at	5.06e-07	4.79e-08	-6.18687	8.0657	-0.703109	TSPYL1	TSPY like 1	7259			AL136629
219147_s_at	5.07e-07	4.8e-08	-6.18622	8.06315	-0.587145	NMRK1	nicotinamide riboside kinase 1	54981			NM_017881
215022_x_at	5.13e-07	4.86e-08	-6.18323	8.05155	-1.54009	ZNF33B	zinc finger protein 33B	7582			BG429214
214168_s_at	5.17e-07	4.9e-08	-6.18115	8.04346	-0.855959	TJP1	tight junction protein 1	7082
204389_at	5.23e-07	4.97e-08	-6.17787	8.03069	-1.8203	MAOA	monoamine oxidase A	4128			NM_000240
204143_s_at	5.27e-07	5e-08	-6.17598	8.02334	-0.819631	ENOSF1	enolase superfamily member 1	55556			NM_017512
212999_x_at	5.32e-07	5.06e-08	-6.17335	8.01314	-3.38176	LOC101060835///HLA-DQB1	HLA class II histocompatibility antigen, DQ beta 1 chain-like///major histocompatibility complex, class II, DQ beta 1	101060835///3119
210150_s_at	5.35e-07	5.09e-08	-6.17157	8.00622	-0.895251	LAMA5	laminin subunit alpha 5	3911			BC003355
220354_at	5.35e-07	5.09e-08	-6.1715	8.00594	-1.44016	MCF2L-AS1	MCF2L antisense RNA 1	100289410
212754_s_at	5.53e-07	5.27e-08	-6.16277	7.97203	-0.645805	MON2	MON2 homolog, regulator of endosome-to-Golgi trafficking	23041			AI760249
201352_at	5.58e-07	5.33e-08	-6.16017	7.96193	-0.755453	YME1L1	YME1 like 1 ATPase	10730			NM_014263
214586_at	5.62e-07	5.37e-08	-6.15819	7.95425	-2.54138	GPR37	G protein-coupled receptor 37	2861			T16257
211110_s_at	5.82e-07	5.58e-08	-6.14857	7.91688	-1.37769	AR	androgen receptor	367			AF162704
204917_s_at	5.85e-07	5.61e-08	-6.14697	7.91068	-1.06226	MLLT3	MLLT3, super elongation complex subunit	4300			AV756536
45297_at	5.87e-07	5.63e-08	-6.14615	7.90747	-1.2872	EHD2	EH domain containing 2	30846
222368_at	5.87e-07	5.63e-08	-6.14601	7.90694	-0.770636				CDNA FLJ39459 fis, clone PROST2011439	Hs.649066	AW972351
213860_x_at	5.92e-07	5.69e-08	-6.14371	7.89799	-0.652233	CSNK1A1	casein kinase 1 alpha 1	1452			AW268585
204479_at	6.03e-07	5.8e-08	-6.13866	7.8784	-0.955033	OSTF1	osteoclast stimulating factor 1	26578			NM_012383
204589_at	6.03e-07	5.81e-08	-6.13835	7.8772	-1.37682	NUAK1	NUAK family kinase 1	9891			NM_014840
209357_at	6.11e-07	5.89e-08	-6.13499	7.86417	-2.34	CITED2	Cbp/p300 interacting transactivator with Glu/Asp rich carboxy-terminal domain 2	10370			AF109161
203697_at	6.12e-07	5.9e-08	-6.13447	7.86212	-1.91888	FRZB	frizzled-related protein	2487			U91903
222223_s_at	6.22e-07	6.01e-08	-6.12995	7.8446	-1.73827	IL36RN	interleukin 36 receptor antagonist	26525			AF216693
218192_at	6.28e-07	6.07e-08	-6.12727	7.83421	-0.749092	IP6K2	inositol hexakisphosphate kinase 2	51447			NM_016291
207431_s_at	6.3e-07	6.09e-08	-6.12656	7.83146	-1.56707	DEGS1	delta 4-desaturase, sphingolipid 1	8560			NM_003676
201811_x_at	6.31e-07	6.1e-08	-6.12608	7.82961	-1.31769	SH3BP5	SH3 domain binding protein 5	9467			NM_004844
221655_x_at	6.33e-07	6.12e-08	-6.12518	7.82608	-0.729163	EPS8L1	EPS8 like 1	54869			AF282167
205107_s_at	6.48e-07	6.28e-08	-6.11854	7.80036	-0.866534	EFNA4	ephrin A4	1945			NM_005227
213288_at	6.65e-07	6.46e-08	-6.11158	7.77336	-0.584882	MBOAT2	membrane bound O-acyltransferase domain containing 2	129642			AI761250
201502_s_at	6.65e-07	6.46e-08	-6.11144	7.77282	-1.44322	NFKBIA	NFKB inhibitor alpha	4792
201902_s_at	6.69e-07	6.5e-08	-6.10996	7.76707	-1.47005	YY1	YY1 transcription factor	7528			BG390664
203339_at	6.7e-07	6.52e-08	-6.10917	7.76401	-0.855027	SLC25A12	solute carrier family 25 member 12	8604			AI887457
209159_s_at	6.73e-07	6.55e-08	-6.10811	7.75992	-1.96681	NDRG4	NDRG family member 4	65009			AV724216
206677_at	6.97e-07	6.79e-08	-6.09882	7.72392	-1.84719	KRT31	keratin 31	3881			NM_002277
215659_at	7.16e-07	7e-08	-6.09106	7.69385	-1.59176	GSDMB	gasdermin B	55876			AK025174
200696_s_at	7.16e-07	7.01e-08	-6.0907	7.69245	-0.832746	GSN	gelsolin	2934			NM_000177
217995_at	7.18e-07	7.04e-08	-6.08987	7.68923	-1.78419	SQRDL	sulfide quinone reductase-like (yeast)	58472			NM_021199
200002_at	7.22e-07	7.08e-08	-6.08854	7.68407	-0.562751	RPL35	ribosomal protein L35	11224	NA	NA	NM_007209
212387_at	7.31e-07	7.17e-08	-6.08503	7.67048	-1.37231	TCF4	transcription factor 4	6925			BG495771
91826_at	7.33e-07	7.2e-08	-6.08411	7.66695	-1.33056	EPS8L1	EPS8 like 1	54869
208650_s_at	7.35e-07	7.22e-08	-6.08355	7.66478	-3.17449	CD24	CD24 molecule	100133941			BG327863
201807_at	7.35e-07	7.23e-08	-6.08313	7.66315	-0.571346	VPS26A	VPS26, retromer complex component A	9559			NM_004896
209890_at	7.6e-07	7.47e-08	-6.07468	7.63041	-1.40433	TSPAN5	tetraspanin 5	10098			AF065389
220015_at	7.61e-07	7.49e-08	-6.07411	7.62822	-0.657699	CASZ1	castor zinc finger 1	54897			NM_017766
218448_at	7.64e-07	7.52e-08	-6.07303	7.62404	-0.454281	GID8	GID complex subunit 8 homolog	54994			NM_017896
217312_s_at	7.64e-07	7.53e-08	-6.07294	7.62371	-2.16306	COL7A1	collagen type VII alpha 1 chain	1294			L23982
202371_at	7.7e-07	7.6e-08	-6.07052	7.6143	-0.635439	TCEAL4	transcription elongation factor A like 4	79921			NM_024863
206870_at	7.81e-07	7.72e-08	-6.0666	7.59917	-1.02228	PPARA	peroxisome proliferator activated receptor alpha	5465			NM_005036
211681_s_at	7.81e-07	7.72e-08	-6.06646	7.59863	-0.850553	PDLIM5	PDZ and LIM domain 5	10611			AF116705
211139_s_at	7.9e-07	7.81e-08	-6.06342	7.58685	-0.629448	NAB1	NGFI-A binding protein 1	4664			AF045452
203869_at	8.03e-07	7.95e-08	-6.05908	7.57004	-1.31489	USP46	ubiquitin specific peptidase 46	64854
203815_at	8.03e-07	7.95e-08	-6.0589	7.56937	-2.14863	GSTT1	glutathione S-transferase theta 1	2952			NM_000853
48031_r_at	8.19e-07	8.14e-08	-6.0532	7.54734	-0.924555	FAXDC2	fatty acid hydroxylase domain containing 2	10826			H93077
200794_x_at	8.19e-07	8.14e-08	-6.05312	7.54701	-0.789799	DAZAP2	DAZ associated protein 2	9802			NM_014764
215548_s_at	8.26e-07	8.21e-08	-6.05095	7.53863	-0.678522	SCFD1	sec1 family domain containing 1	23256			AB020724
213942_at	8.27e-07	8.22e-08	-6.0506	7.53728	-1.73258	MEGF6	multiple EGF like domains 6	1953			AL134303
201409_s_at	8.36e-07	8.32e-08	-6.04758	7.52561	-0.951485	PPP1CB	protein phosphatase 1 catalytic subunit beta	5500			NM_002709
201778_s_at	8.47e-07	8.43e-08	-6.0441	7.51214	-0.431704	EFCAB14	EF-hand calcium binding domain 14	9813			NM_014774
203836_s_at	8.52e-07	8.5e-08	-6.04216	7.50464	-1.56328	MAP3K5	mitogen-activated protein kinase kinase kinase 5	4217			D84476
209866_s_at	8.52e-07	8.5e-08	-6.04201	7.50405	-1.73212	ADGRL3	adhesion G protein-coupled receptor L3	23284			R50822
200834_s_at	8.54e-07	8.52e-08	-6.04153	7.50219	-0.662898	RPS21	ribosomal protein S21	6227			NM_001024
219229_at	8.55e-07	8.54e-08	-6.0408	7.49937	-1.58619	SLCO3A1	solute carrier organic anion transporter family member 3A1	28232			NM_013272
213624_at	8.74e-07	8.74e-08	-6.03506	7.47718	-1.02414	SMPDL3A	sphingomyelin phosphodiesterase acid like 3A	10924
216339_s_at	8.75e-07	8.75e-08	-6.03473	7.47594	-2.04551	TNXB///TNXA	tenascin XB///tenascin XA (pseudogene)	7148///7146			AF086641
206356_s_at	8.78e-07	8.8e-08	-6.03327	7.47027	-2.04928	GNAL	G protein subunit alpha L	2774
205933_at	8.81e-07	8.84e-08	-6.03232	7.46661	-1.91991	SETBP1	SET binding protein 1	26040			NM_015559
210273_at	8.83e-07	8.86e-08	-6.03175	7.4644	-1.15291	PCDH7	protocadherin 7	5099			AB006757
217877_s_at	8.83e-07	8.86e-08	-6.03158	7.46376	-0.57654	GPBP1L1	GC-rich promoter binding protein 1 like 1	60313			NM_021639
210544_s_at	8.87e-07	8.91e-08	-6.03031	7.45886	-1.5339	ALDH3A2	aldehyde dehydrogenase 3 family member A2	224			BC002430
203499_at	8.87e-07	8.91e-08	-6.03016	7.45828	-1.54945	EPHA2	EPH receptor A2	1969			NM_004431
201371_s_at	8.87e-07	8.92e-08	-6.02995	7.45747	-0.551498	CUL3	cullin 3	8452			AF062537
213068_at	8.94e-07	9e-08	-6.02752	7.44808	-2.33244	DPT	dermatopontin	1805
200092_s_at	9e-07	9.07e-08	-6.02566	7.44087	-0.614441	RPL37	ribosomal protein L37	6167			BF216701
214864_s_at	9.02e-07	9.1e-08	-6.02486	7.4378	-0.55799	GRHPR	glyoxylate and hydroxypyruvate reductase	9380
214036_at	9.12e-07	9.22e-08	-6.02161	7.42525	-0.657543	EFNA5	ephrin A5	1946			BE464799
205253_at	9.34e-07	9.45e-08	-6.01517	7.40037	-1.39202	PBX1	PBX homeobox 1	5087			NM_002585
211202_s_at	9.44e-07	9.56e-08	-6.01229	7.38926	-0.728456	KDM5B	lysine demethylase 5B	10765			AF087481
205535_s_at	9.6e-07	9.74e-08	-6.00765	7.37135	-2.56153	PCDH7	protocadherin 7	5099			NM_002589
204038_s_at	9.73e-07	9.88e-08	-6.00399	7.35723	-0.956583	LPAR1	lysophosphatidic acid receptor 1	1902			NM_001401
204941_s_at	9.78e-07	9.94e-08	-6.00248	7.3514	-2.89539	ALDH3B2	aldehyde dehydrogenase 3 family member B2	222
201329_s_at	9.79e-07	9.96e-08	-6.00199	7.34952	-1.2031	ETS2	ETS proto-oncogene 2, transcription factor	2114			NM_005239
207430_s_at	9.84e-07	1e-07	-6.00072	7.34463	-2.49188	MSMB	microseminoprotein beta	4477			NM_002443
216470_x_at	9.87e-07	1e-07	-5.99971	7.3407	-1.92228	PRSS2	protease, serine 2	5645			AF009664
207911_s_at	9.88e-07	1.01e-07	-5.99947	7.33979	-1.47503	TGM5	transglutaminase 5	9333			NM_004245
206492_at	9.9e-07	1.01e-07	-5.99863	7.33655	-1.07795	FHIT	fragile histidine triad	2272			NM_002012
212790_x_at	9.95e-07	1.01e-07	-5.99725	7.33121	-0.572375	RPL13AP5///SNORD32A///SNORD33///SNORD34///SNORD35A///RPL13A	ribosomal protein L13a pseudogene 5///small nucleolar RNA, C/D box 32A///small nucleolar RNA, C/D box 33///small nucleolar RNA, C/D box 34///small nucleolar RNA, C/D box 35A///ribosomal protein L13a	728658///26819///26818///26817///26816///23521
220942_x_at	1e-06	1.02e-07	-5.99577	7.3255	-0.707852	FAM162A	family with sequence similarity 162 member A	26355			NM_014367
208296_x_at	1e-06	1.02e-07	-5.99567	7.32513	-1.16428	TNFAIP8	TNF alpha induced protein 8	25816			NM_014350
206873_at	1.01e-06	1.03e-07	-5.99369	7.31749	-1.91722	CA6	carbonic anhydrase 6	765			NM_001215
215533_s_at	1.01e-06	1.04e-07	-5.99125	7.30808	-1.19851	UBE4B	ubiquitination factor E4B	10277
217889_s_at	1.02e-06	1.04e-07	-5.98993	7.30298	-2.67333	CYBRD1	cytochrome b reductase 1	79901			NM_024843
202515_at	1.03e-06	1.06e-07	-5.98721	7.29252	-0.650694	DLG1	discs large MAGUK scaffold protein 1	1739			BG251175
204380_s_at	1.03e-06	1.06e-07	-5.98617	7.28851	-1.94776	FGFR3	fibroblast growth factor receptor 3	2261			M58051
209502_s_at	1.03e-06	1.06e-07	-5.98544	7.28569	-0.958742	BAIAP2	BAI1 associated protein 2	10458			BC002495
201351_s_at	1.05e-06	1.07e-07	-5.98283	7.27561	-0.860314	YME1L1	YME1 like 1 ATPase	10730			AF070656
212510_at	1.05e-06	1.08e-07	-5.98182	7.27171	-0.522695	GPD1L	glycerol-3-phosphate dehydrogenase 1-like	23171			AA135522
209356_x_at	1.05e-06	1.08e-07	-5.98061	7.26708	-0.993111	EFEMP2	EGF containing fibulin like extracellular matrix protein 2	30008			AB030655
208881_x_at	1.06e-06	1.09e-07	-5.97969	7.2635	-0.671807	IDI1	isopentenyl-diphosphate delta isomerase 1	3422			BC005247
203586_s_at	1.06e-06	1.09e-07	-5.97953	7.26289	-0.899663	ARL4D	ADP ribosylation factor like GTPase 4D	379			NM_001661
209613_s_at	1.06e-06	1.09e-07	-5.9791	7.26123	-3.32337	ADH1B	alcohol dehydrogenase 1B (class I), beta polypeptide	125			M21692
202731_at	1.06e-06	1.1e-07	-5.977	7.25313	-1.13737	MIR4680///PDCD4	microRNA 4680///programmed cell death 4 (neoplastic transformation inhibitor)	100616113///27250			NM_014456
212759_s_at	1.06e-06	1.1e-07	-5.97683	7.25251	-1.13607	TCF7L2	transcription factor 7 like 2	6934
219850_s_at	1.08e-06	1.12e-07	-5.97261	7.23622	-2.57492	EHF	ETS homologous factor	26298			NM_012153
217593_at	1.08e-06	1.12e-07	-5.97227	7.23493	-1.54352	ZSCAN18	zinc finger and SCAN domain containing 18	65982
212730_at	1.09e-06	1.13e-07	-5.96982	7.2255	-1.16791	SYNM	synemin	23336			AK026420
208632_at	1.11e-06	1.15e-07	-5.9652	7.2077	-0.57261	RNF10	ring finger protein 10	9921			AL578551
63305_at	1.12e-06	1.16e-07	-5.96403	7.20319	-1.35489	PKNOX2	PBX/knotted 1 homeobox 2	63876			D81792
202130_at	1.12e-06	1.16e-07	-5.96255	7.19749	-0.566502	RIOK3	RIO kinase 3	8780
221728_x_at	1.12e-06	1.17e-07	-5.96155	7.19362	-2.70188	XIST	X inactive specific transcript (non-protein coding)	7503			AA628440
204048_s_at	1.13e-06	1.18e-07	-5.95949	7.18568	-1.38493	PHACTR2	phosphatase and actin regulator 2	9749
219173_at	1.13e-06	1.18e-07	-5.95948	7.18566	-0.977179	MYO15B	myosin XVB	80022
208146_s_at	1.14e-06	1.18e-07	-5.95837	7.18138	-2.49738	CPVL	carboxypeptidase, vitellogenic like	54504			NM_031311
218454_at	1.14e-06	1.18e-07	-5.95832	7.18119	-1.33019	PLBD1	phospholipase B domain containing 1	79887			NM_024829
219930_at	1.15e-06	1.19e-07	-5.95614	7.17278	-1.63534	KLF8	Kruppel like factor 8	11279			NM_007250
200960_x_at	1.15e-06	1.2e-07	-5.9554	7.16997	-0.537865	CLTA	clathrin light chain A	1211			NM_007096
212598_at	1.16e-06	1.21e-07	-5.95309	7.16105	-1.607	WDFY3	WD repeat and FYVE domain containing 3	23001			BE348236
201871_s_at	1.16e-06	1.21e-07	-5.95276	7.1598	-0.520165	UBXN1	UBX domain protein 1	51035			NM_015853
202883_s_at	1.16e-06	1.21e-07	-5.95245	7.15857	-0.582423	PPP2R1B	protein phosphatase 2 scaffold subunit Abeta	5519			T79584
200667_at	1.16e-06	1.21e-07	-5.95237	7.15828	-0.4704	UBE2D3	ubiquitin conjugating enzyme E2 D3	7323			BF448062
207126_x_at	1.16e-06	1.22e-07	-5.95106	7.15326	-0.93002	UGT1A1///UGT1A4///UGT1A9///UGT1A6///UGT1A8///UGT1A10	UDP glucuronosyltransferase family 1 member A1///UDP glucuronosyltransferase family 1 member A4///UDP glucuronosyltransferase family 1 member A9///UDP glucuronosyltransferase family 1 member A6///UDP glucuronosyltransferase family 1 member A8///UDP glucuronosyltransferase family 1 member A10	54658///54657///54600///54578///54576///54575			NM_000463
210026_s_at	1.17e-06	1.23e-07	-5.9486	7.14378	-1.42315	CARD10	caspase recruitment domain family member 10	29775			AY028896
219908_at	1.18e-06	1.24e-07	-5.94644	7.13547	-2.307	DKK2	dickkopf WNT signaling pathway inhibitor 2	27123			NM_014421
204224_s_at	1.19e-06	1.24e-07	-5.94581	7.13302	-1.83558	GCH1	GTP cyclohydrolase 1	2643			NM_000161
218149_s_at	1.19e-06	1.24e-07	-5.94581	7.13302	-0.784382	ZNF395	zinc finger protein 395	55893			NM_018660
211891_s_at	1.19e-06	1.25e-07	-5.94502	7.12999	-1.24248	LOC101930241///ARHGEF4	rho guanine nucleotide exchange factor 4-like///Rho guanine nucleotide exchange factor 4	101930241///50649			AB042199
213750_at	1.2e-06	1.26e-07	-5.94318	7.12291	-0.749855	RSL1D1	ribosomal L1 domain containing 1	26156			AA928506
208865_at	1.21e-06	1.27e-07	-5.93957	7.10902	-0.771395	CSNK1A1	casein kinase 1 alpha 1	1452			BG534245
206515_at	1.22e-06	1.28e-07	-5.93745	7.10089	-1.74557	CYP4F3	cytochrome P450 family 4 subfamily F member 3	4051			NM_000896
203562_at	1.23e-06	1.29e-07	-5.9357	7.09415	-0.992999	FEZ1	fasciculation and elongation protein zeta 1	9638			NM_005103
216935_at	1.23e-06	1.29e-07	-5.93549	7.09333	-2.44529	LINC00302	long intergenic non-protein coding RNA 302	388699			AF005082
203531_at	1.23e-06	1.3e-07	-5.93505	7.09164	-0.633024	CUL5	cullin 5	8065			BF435809
203897_at	1.23e-06	1.3e-07	-5.93434	7.08891	-0.499694	LYRM1	LYR motif containing 1	57149			BE963444
210588_x_at	1.24e-06	1.31e-07	-5.93276	7.08285	-0.583857	HNRNPH3	heterogeneous nuclear ribonucleoprotein H3	3189			L32610
217939_s_at	1.26e-06	1.33e-07	-5.92943	7.07001	-0.526375	AFTPH	aftiphilin	54812			NM_017657
204671_s_at	1.26e-06	1.33e-07	-5.92909	7.06874	-1.78742	ANKRD6	ankyrin repeat domain 6	22881			BE677131
219789_at	1.26e-06	1.33e-07	-5.92788	7.06407	-1.3594	NPR3	natriuretic peptide receptor 3	4883
212231_at	1.27e-06	1.34e-07	-5.92681	7.05996	-0.51135	FBXO21	F-box protein 21	23014			AB020682
201347_x_at	1.27e-06	1.35e-07	-5.9254	7.05453	-0.616565	GRHPR	glyoxylate and hydroxypyruvate reductase	9380			NM_012203
212989_at	1.28e-06	1.36e-07	-5.92342	7.04692	-1.12041	SGMS1	sphingomyelin synthase 1	259230			AI377497
217742_s_at	1.28e-06	1.36e-07	-5.92249	7.04335	-0.580241	WAC	WW domain containing adaptor with coiled-coil	51322			NM_016628
214505_s_at	1.31e-06	1.39e-07	-5.91736	7.02362	-1.41579	FHL1	four and a half LIM domains 1	2273			AF220153
209821_at	1.33e-06	1.41e-07	-5.91384	7.01012	-2.53022	IL33	interleukin 33	90865			AB024518
205407_at	1.35e-06	1.43e-07	-5.90953	6.99354	-1.72123	RECK	reversion inducing cysteine rich protein with kazal motifs	8434			NM_021111
221951_at	1.36e-06	1.45e-07	-5.90677	6.98293	-1.10583	TMEM80	transmembrane protein 80	283232			AI739035
220027_s_at	1.36e-06	1.45e-07	-5.90573	6.97896	-1.21302	RASIP1	Ras interacting protein 1	54922			NM_017805
211115_x_at	1.37e-06	1.46e-07	-5.90466	6.97486	-0.558687	GEMIN2	gem nuclear organelle associated protein 2	8487			AB037703
214279_s_at	1.37e-06	1.47e-07	-5.90334	6.96977	-1.71599	NDRG2	NDRG family member 2	57447			W74452
210162_s_at	1.38e-06	1.47e-07	-5.90281	6.96773	-0.787296	NFATC1	nuclear factor of activated T-cells 1	4772			U08015
201724_s_at	1.4e-06	1.49e-07	-5.89881	6.95237	-0.911671	GALNT1	polypeptide N-acetylgalactosaminyltransferase 1	2589			NM_020474
219459_at	1.4e-06	1.5e-07	-5.89814	6.94979	-0.567698	POLR3B	RNA polymerase III subunit B	55703			NM_018082
202453_s_at	1.41e-06	1.51e-07	-5.89701	6.94547	-0.817369	GTF2H1	general transcription factor IIH subunit 1	2965			NM_005316
210413_x_at	1.42e-06	1.52e-07	-5.89443	6.93558	-2.03056	SERPINB4///SERPINB3	serpin family B member 4///serpin family B member 3	6318///6317			U19557
205364_at	1.42e-06	1.52e-07	-5.89379	6.9331	-1.87425	ACOX2	acyl-CoA oxidase 2	8309			NM_003500
209089_at	1.44e-06	1.54e-07	-5.89056	6.92069	-0.573892	RAB5A	RAB5A, member RAS oncogene family	5868			BC001267
209574_s_at	1.45e-06	1.56e-07	-5.8883	6.91202	-0.747271	LDLRAD4	low density lipoprotein receptor class A domain containing 4	753			AI349506
216535_at	1.45e-06	1.56e-07	-5.88722	6.90789	-1.34937	CADM3	cell adhesion molecule 3	57863			AL050219
204246_s_at	1.47e-06	1.58e-07	-5.88433	6.89679	-0.790635	DCTN3	dynactin subunit 3	11258			NM_007234
212978_at	1.47e-06	1.59e-07	-5.88307	6.89196	-1.08539	LRRC8B	leucine rich repeat containing 8 family member B	23507			AU146004
204154_at	1.47e-06	1.59e-07	-5.88294	6.89145	-1.35542	CDO1	cysteine dioxygenase type 1	1036			NM_001801
211922_s_at	1.48e-06	1.59e-07	-5.88246	6.88961	-1.72531	CAT	catalase	847			AY028632
209755_at	1.49e-06	1.61e-07	-5.8792	6.87714	-1.20539	NMNAT2	nicotinamide nucleotide adenylyltransferase 2	23057			AF288395
219855_at	1.5e-06	1.62e-07	-5.87893	6.8761	-1.4815	NUDT11	nudix hydrolase 11	55190			NM_018159
202780_at	1.51e-06	1.64e-07	-5.87572	6.86378	-0.58206	OXCT1	3-oxoacid CoA-transferase 1	5019			NM_000436
214744_s_at	1.51e-06	1.64e-07	-5.87557	6.86321	-1.30981	SNORA21///RPL23	small nucleolar RNA, H/ACA box 21///ribosomal protein L23	619505///9349			AK021960
200005_at	1.55e-06	1.67e-07	-5.86993	6.84155	-0.627474	EIF3D	eukaryotic translation initiation factor 3 subunit D	8664	NA	NA	NM_003753
203661_s_at	1.55e-06	1.68e-07	-5.86857	6.83634	-1.10297	TMOD1	tropomodulin 1	7111			BC002660
208801_at	1.57e-06	1.7e-07	-5.86639	6.82802	-0.509812	SRP72	signal recognition particle 72	6731			BE856385
202302_s_at	1.61e-06	1.75e-07	-5.8586	6.79813	-0.480626	RSRC2	arginine and serine rich coiled-coil 2	65117			NM_023012
205730_s_at	1.62e-06	1.76e-07	-5.857	6.79202	-2.14479	ABLIM3	actin binding LIM protein family member 3	22885			NM_014945
216308_x_at	1.62e-06	1.76e-07	-5.85687	6.7915	-0.669506	GRHPR	glyoxylate and hydroxypyruvate reductase	9380
209729_at	1.67e-06	1.81e-07	-5.84966	6.76387	-0.723772	GAS2L1	growth arrest specific 2 like 1	10634			BC001782
208985_s_at	1.69e-06	1.84e-07	-5.84616	6.75048	-0.924503	EIF3J	eukaryotic translation initiation factor 3 subunit J	8669			BC002719
200949_x_at	1.7e-06	1.85e-07	-5.84423	6.7431	-0.611443	SNORD54///RPS20	small nucleolar RNA, C/D box 54///ribosomal protein S20	26795///6224			NM_001023
202259_s_at	1.73e-06	1.88e-07	-5.84036	6.7283	-0.587071	N4BP2L2	NEDD4 binding protein 2 like 2	10443			NM_014887
214451_at	1.73e-06	1.88e-07	-5.83997	6.72677	-3.07144	TFAP2B	transcription factor AP-2 beta	7021			NM_003221
204546_at	1.74e-06	1.89e-07	-5.83863	6.72167	-1.72099	KIAA0513	KIAA0513	9764			NM_014732
201839_s_at	1.74e-06	1.89e-07	-5.83863	6.72164	-2.04122	EPCAM	epithelial cell adhesion molecule	4072			NM_002354
201034_at	1.76e-06	1.92e-07	-5.83518	6.70844	-0.8612	ADD3	adducin 3	120			BE545756
213657_s_at	1.78e-06	1.94e-07	-5.83197	6.69618	-0.849085				MRNA full length insert cDNA clone EUROIMAGE 826033	Hs.655249	BE858194
208937_s_at	1.78e-06	1.95e-07	-5.83132	6.69367	-1.73909	ID1	inhibitor of DNA binding 1, HLH protein	3397			D13889
201012_at	1.81e-06	1.98e-07	-5.82768	6.67976	-1.84095	ANXA1	annexin A1	301			NM_000700
203387_s_at	1.81e-06	1.98e-07	-5.8272	6.67792	-1.0908	TBC1D4	TBC1 domain family member 4	9882			NM_014832
202506_at	1.83e-06	2e-07	-5.82393	6.66541	-0.72282	SSFA2	sperm specific antigen 2	6744			NM_006751
220987_s_at	1.83e-06	2e-07	-5.82392	6.66537	-1.12332	NUAK2///AKIP1	NUAK family kinase 2///A-kinase interacting protein 1	81788///56672			NM_030952
219513_s_at	1.84e-06	2.01e-07	-5.8228	6.66108	-1.70131	SH2D3A	SH2 domain containing 3A	10045			NM_005490
211962_s_at	1.85e-06	2.03e-07	-5.82116	6.65481	-1.09536	ZFP36L1	ZFP36 ring finger protein like 1	677			BG250310
212630_at	1.85e-06	2.04e-07	-5.81987	6.64988	-0.893999	EXOC3	exocyst complex component 3	11336			AF055006
211905_s_at	1.86e-06	2.04e-07	-5.81926	6.64753	-1.10586	ITGB4	integrin subunit beta 4	3691			AF011375
218031_s_at	1.86e-06	2.05e-07	-5.81855	6.64483	-1.12875	FOXN3	forkhead box N3	1112			NM_005197
207977_s_at	1.89e-06	2.08e-07	-5.81492	6.63094	-2.64807	DPT	dermatopontin	1805			NM_001937
201339_s_at	1.89e-06	2.09e-07	-5.81365	6.62609	-0.61959	SCP2	sterol carrier protein 2	6342			NM_002979
203053_at	1.9e-06	2.1e-07	-5.81219	6.62051	-0.776722	BCAS2	breast carcinoma amplified sequence 2	10286			NM_005872
221081_s_at	1.9e-06	2.1e-07	-5.81195	6.6196	-2.50372	DENND2D	DENN domain containing 2D	79961			NM_024901
214823_at	1.91e-06	2.11e-07	-5.81061	6.61446	-1.50339	ZNF204P	zinc finger protein 204, pseudogene	7754			AF033199
219545_at	1.92e-06	2.13e-07	-5.80892	6.60801	-1.82062	NDUFC2-KCTD14///KCTD14	NDUFC2-KCTD14 readthrough///potassium channel tetramerization domain containing 14	100532726///65987			NM_023930
201567_s_at	1.94e-06	2.15e-07	-5.80639	6.59835	-0.770979	GOLGA4	golgin A4	2803			NM_002078
202703_at	1.95e-06	2.16e-07	-5.80481	6.5923	-0.448952	DUSP11	dual specificity phosphatase 11	8446			NM_003584
213935_at	1.98e-06	2.2e-07	-5.80067	6.57648	-1.40188	ABHD5	abhydrolase domain containing 5	51099			AF007132
219428_s_at	1.99e-06	2.2e-07	-5.79975	6.57299	-0.510507	PXMP4	peroxisomal membrane protein 4	11264
210069_at	1.99e-06	2.21e-07	-5.79953	6.57212	-1.31922	CHKB-CPT1B///CPT1B	CHKB-CPT1B readthrough (NMD candidate)///carnitine palmitoyltransferase 1B	386593///1375			U62733
214020_x_at	2.01e-06	2.23e-07	-5.79615	6.55922	-1.19246	ITGB5	integrin subunit beta 5	3693
202685_s_at	2.01e-06	2.24e-07	-5.79583	6.558	-1.29951	AXL	AXL receptor tyrosine kinase	558
200962_at	2.01e-06	2.24e-07	-5.79573	6.55762	-0.830996	RPL31	ribosomal protein L31	6160
201071_x_at	2.03e-06	2.26e-07	-5.7936	6.54947	-0.463612	SF3B1	splicing factor 3b subunit 1	23451			NM_012433
201709_s_at	2.04e-06	2.27e-07	-5.79208	6.54369	-0.583739	NIPSNAP1	nipsnap homolog 1 (C. elegans)	8508			NM_003634
201738_at	2.04e-06	2.28e-07	-5.79136	6.54092	-0.743143	EIF1B	eukaryotic translation initiation factor 1B	10289			NM_005875
213291_s_at	2.09e-06	2.33e-07	-5.78507	6.51691	-1.32275	UBE3A	ubiquitin protein ligase E3A	7337			AA160522
208567_s_at	2.09e-06	2.34e-07	-5.78432	6.51407	-1.53997	LOC100996843///KCNJ18///KCNJ12	ATP-sensitive inward rectifier potassium channel 12-like///potassium voltage-gated channel subfamily J member 18///potassium voltage-gated channel subfamily J member 12	100996843///100134444///3768			NM_021012
214549_x_at	2.13e-06	2.39e-07	-5.7793	6.4949	-2.34772	SPRR1A	small proline rich protein 1A	6698			NM_005987
218331_s_at	2.15e-06	2.4e-07	-5.77744	6.48781	-0.665326	FAM208B	family with sequence similarity 208 member B	54906			NM_017782
218366_x_at	2.19e-06	2.46e-07	-5.77186	6.46653	-0.654153	METTL17	methyltransferase like 17	64745			NM_022734
222025_s_at	2.2e-06	2.48e-07	-5.76959	6.45784	-1.59097	OPLAH	5-oxoprolinase (ATP-hydrolysing)	26873
219296_at	2.21e-06	2.49e-07	-5.76834	6.45306	-1.49806	ZDHHC13	zinc finger DHHC-type containing 13	54503			NM_019028
219861_at	2.28e-06	2.57e-07	-5.76031	6.42245	-1.29611	DNAJC17	DnaJ heat shock protein family (Hsp40) member C17	55192			NM_018163
206628_at	2.29e-06	2.58e-07	-5.75978	6.42046	-0.772014	SLC5A1	solute carrier family 5 member 1	6523			NM_000343
207655_s_at	2.29e-06	2.58e-07	-5.75937	6.41889	-1.61038	BLNK	B-cell linker	29760			NM_013314
210179_at	2.29e-06	2.59e-07	-5.75853	6.41567	-2.12394	KCNJ13	potassium voltage-gated channel subfamily J member 13	3769			AJ007557
204518_s_at	2.32e-06	2.62e-07	-5.75569	6.40484	-1.30202	PPIC	peptidylprolyl isomerase C	5480			NM_000943
203002_at	2.34e-06	2.64e-07	-5.75326	6.39558	-0.609625	AMOTL2	angiomotin like 2	51421			NM_016201
220351_at	2.34e-06	2.65e-07	-5.75257	6.39297	-1.97045	ACKR4	atypical chemokine receptor 4	51554			NM_016557
208924_at	2.37e-06	2.69e-07	-5.74877	6.3785	-0.669041	RNF11	ring finger protein 11	26994			AB024703
214598_at	2.38e-06	2.7e-07	-5.74749	6.37362	-1.66473	CLDN8	claudin 8	9073			AL049977
203837_at	2.39e-06	2.72e-07	-5.74614	6.36846	-1.1934	MAP3K5	mitogen-activated protein kinase kinase kinase 5	4217			NM_005923
202151_s_at	2.41e-06	2.74e-07	-5.74375	6.35935	-0.694163	UBAC1	UBA domain containing 1	10422			NM_016172
209630_s_at	2.43e-06	2.77e-07	-5.74119	6.3496	-0.587095	FBXW2	F-box and WD repeat domain containing 2	26190			AL043967
220892_s_at	2.43e-06	2.77e-07	-5.74101	6.34893	-1.18929	PSAT1	phosphoserine aminotransferase 1	29968			NM_021154
48825_at	2.44e-06	2.78e-07	-5.74017	6.34571	-1.00842	ING4	inhibitor of growth family member 4	51147
211778_s_at	2.54e-06	2.89e-07	-5.72992	6.3067	-1.0314	OVOL2	ovo like zinc finger 2	58495			BC006148
202036_s_at	2.58e-06	2.95e-07	-5.72494	6.28774	-2.26136	SFRP1	secreted frizzled related protein 1	6422			AF017987
202720_at	2.63e-06	3.01e-07	-5.71974	6.26799	-0.776622	TES	testin LIM domain protein	26136			NM_015641
209829_at	2.67e-06	3.05e-07	-5.71618	6.25443	-2.10493	FAM65B	family with sequence similarity 65 member B	9750			AB002384
209335_at	2.67e-06	3.05e-07	-5.71616	6.25434	-1.73832	DCN	decorin	1634			AI281593
212713_at	2.71e-06	3.1e-07	-5.71212	6.23898	-2.43394	MFAP4	microfibrillar associated protein 4	4239			R72286
209647_s_at	2.72e-06	3.12e-07	-5.71041	6.2325	-0.626845	SOCS5	suppressor of cytokine signaling 5	9655			AW664421
207040_s_at	2.73e-06	3.13e-07	-5.70978	6.23008	-0.554161	ST13	suppression of tumorigenicity 13 (colon carcinoma) (Hsp70 interacting protein)	6767			NM_003932
220585_at	2.74e-06	3.15e-07	-5.70814	6.22388	-2.10417	HKDC1	hexokinase domain containing 1	80201			NM_025130
215772_x_at	2.8e-06	3.23e-07	-5.70191	6.20017	-0.653285	SUCLG2	succinate-CoA ligase GDP-forming beta subunit	8801			AL050226
202414_at	2.86e-06	3.29e-07	-5.69674	6.18056	-0.702312	ERCC5	ERCC excision repair 5, endonuclease	2073			NM_000123
214271_x_at	2.86e-06	3.29e-07	-5.69667	6.18027	-0.646187	RPL12	ribosomal protein L12	6136
205399_at	2.86e-06	3.31e-07	-5.69582	6.17704	-0.906474	DCLK1	doublecortin like kinase 1	9201			NM_004734
204663_at	2.91e-06	3.36e-07	-5.69175	6.16158	-1.16088	ME3	malic enzyme 3	10873			NM_006680
207996_s_at	2.93e-06	3.39e-07	-5.68904	6.1513	-2.05793	LDLRAD4	low density lipoprotein receptor class A domain containing 4	753
215062_at	2.94e-06	3.4e-07	-5.68848	6.14918	-1.54257				MRNA; cDNA DKFZp547N074 (from clone DKFZp547N074)	Hs.676449	AL390143
213308_at	2.94e-06	3.41e-07	-5.68787	6.14684	-1.79813	SHANK2	SH3 and multiple ankyrin repeat domains 2	22941			BF435773
216678_at	2.99e-06	3.48e-07	-5.68276	6.12747	-0.664974	IFT122	intraflagellar transport 122	55764			AK000773
205211_s_at	3.05e-06	3.55e-07	-5.67728	6.10665	-0.68405	RIN1	Ras and Rab interactor 1	9610			NM_004292
65718_at	3.07e-06	3.57e-07	-5.67613	6.1023	-0.75669	ADGRA2	adhesion G protein-coupled receptor A2	25960			AI655903
205206_at	3.11e-06	3.63e-07	-5.67192	6.08631	-1.34547	ANOS1	anosmin 1	3730			NM_000216
201549_x_at	3.12e-06	3.63e-07	-5.6714	6.08436	-0.635071	KDM5B	lysine demethylase 5B	10765			NM_006618
205713_s_at	3.14e-06	3.67e-07	-5.66908	6.07555	-3.09909	COMP	cartilage oligomeric matrix protein	1311			NM_000095
217040_x_at	3.21e-06	3.75e-07	-5.66329	6.05359	-0.497043	SOX15	SRY-box 15	6665			AB025355
200906_s_at	3.24e-06	3.79e-07	-5.66096	6.04474	-1.52206	PALLD	palladin, cytoskeletal associated protein	23022			AK025843
210829_s_at	3.26e-06	3.81e-07	-5.6591	6.03769	-1.05301	SSBP2	single stranded DNA binding protein 2	23635			AF077048
216559_x_at	3.27e-06	3.82e-07	-5.65851	6.03545	-0.613301
214722_at	3.34e-06	3.92e-07	-5.65208	6.0111	-1.4215	NOTCH2NL	notch 2 N-terminal like	388677
212698_s_at	3.4e-06	3.99e-07	-5.64742	5.99346	-0.766322	SEPT10	septin 10	151011			BF966021
200716_x_at	3.42e-06	4.01e-07	-5.64632	5.98927	-0.504429	RPL13AP5///SNORD32A///SNORD33///SNORD34///SNORD35A///RPL13A	ribosomal protein L13a pseudogene 5///small nucleolar RNA, C/D box 32A///small nucleolar RNA, C/D box 33///small nucleolar RNA, C/D box 34///small nucleolar RNA, C/D box 35A///ribosomal protein L13a	728658///26819///26818///26817///26816///23521			NM_012423
221950_at	3.43e-06	4.02e-07	-5.64537	5.98569	-2.11682	EMX2	empty spiracles homeobox 2	2018			AI478455
218729_at	3.46e-06	4.06e-07	-5.6428	5.97594	-1.1247	LXN	latexin	56925			NM_020169
206712_at	3.47e-06	4.08e-07	-5.64175	5.97197	-1.47273	GRTP1	growth hormone regulated TBC protein 1	79774			NM_024719
203698_s_at	3.51e-06	4.12e-07	-5.63883	5.96092	-2.60655	FRZB	frizzled-related protein	2487			NM_001463
218417_s_at	3.53e-06	4.15e-07	-5.63729	5.95506	-1.68938	SLC48A1	solute carrier family 48 member 1	55652			NM_017842
204532_x_at	3.53e-06	4.15e-07	-5.63718	5.95468	-0.820117	UGT1A1///UGT1A4///UGT1A9///UGT1A6///UGT1A8///UGT1A10	UDP glucuronosyltransferase family 1 member A1///UDP glucuronosyltransferase family 1 member A4///UDP glucuronosyltransferase family 1 member A9///UDP glucuronosyltransferase family 1 member A6///UDP glucuronosyltransferase family 1 member A8///UDP glucuronosyltransferase family 1 member A10	54658///54657///54600///54578///54576///54575			NM_021027
222163_s_at	3.59e-06	4.24e-07	-5.63202	5.93513	-0.744327	SPATA5L1	spermatogenesis associated 5 like 1	79029			BE890973
201150_s_at	3.63e-06	4.29e-07	-5.62891	5.92336	-1.33614	TIMP3	TIMP metallopeptidase inhibitor 3	7078			NM_000362
212454_x_at	3.64e-06	4.3e-07	-5.62807	5.92018	-0.652294	HNRNPDL	heterogeneous nuclear ribonucleoprotein D like	9987
212355_at	3.67e-06	4.34e-07	-5.62594	5.91212	-0.512492	KHNYN	KH and NYN domain containing	23351			AI075450
213849_s_at	3.75e-06	4.43e-07	-5.62022	5.89047	-0.939903	PPP2R2B	protein phosphatase 2 regulatory subunit Bbeta	5521
52651_at	3.79e-06	4.49e-07	-5.61702	5.87839	-1.28008	COL8A2	collagen type VIII alpha 2 chain	1296			AI806793
210367_s_at	3.81e-06	4.52e-07	-5.61529	5.87184	-0.726274	PTGES	prostaglandin E synthase	9536			AF010316
217967_s_at	3.87e-06	4.59e-07	-5.6113	5.85677	-1.02666	FAM129A	family with sequence similarity 129 member A	116496			AF288391
219064_at	3.89e-06	4.62e-07	-5.60965	5.85053	-1.67768	ITIH5	inter-alpha-trypsin inhibitor heavy chain family member 5	80760			NM_030569
200741_s_at	3.92e-06	4.66e-07	-5.60749	5.84236	-0.548153	RPS27	ribosomal protein S27	6232			NM_001030
205638_at	3.93e-06	4.67e-07	-5.60686	5.83998	-1.79672	ADGRB3	adhesion G protein-coupled receptor B3	577			NM_001704
203317_at	3.96e-06	4.7e-07	-5.605	5.83293	-1.51854	PSD4	pleckstrin and Sec7 domain containing 4	23550			NM_012455
205289_at	3.97e-06	4.71e-07	-5.60434	5.83044	-1.46885	BMP2	bone morphogenetic protein 2	650			AA583044
215686_x_at	3.99e-06	4.74e-07	-5.60273	5.82436	-2.05283	TFAP2B	transcription factor AP-2 beta	7021
201891_s_at	4.01e-06	4.77e-07	-5.6011	5.81822	-0.860304	B2M	beta-2-microglobulin	567			NM_004048
206284_x_at	4.03e-06	4.8e-07	-5.59978	5.81324	-1.00532	CLTB	clathrin light chain B	1212			NM_001834
215000_s_at	4.04e-06	4.82e-07	-5.59879	5.8095	-0.685508	FEZ2	fasciculation and elongation protein zeta 2	9637			AL117593
200909_s_at	4.11e-06	4.91e-07	-5.59381	5.79068	-0.629274	SNORA52///RPLP2	small nucleolar RNA, H/ACA box 52///ribosomal protein lateral stalk subunit P2	619565///6181			NM_001004
202853_s_at	4.13e-06	4.94e-07	-5.59234	5.78514	-0.443171	RYK	receptor-like tyrosine kinase	6259			NM_002958
209447_at	4.15e-06	4.96e-07	-5.591	5.78007	-1.73224	SYNE1	spectrin repeat containing nuclear envelope protein 1	23345			AF043290
216268_s_at	4.15e-06	4.97e-07	-5.59069	5.7789	-1.31592	JAG1	jagged 1	182			U77914
212042_x_at	4.26e-06	5.11e-07	-5.58375	5.7527	-0.641019	RPL7	ribosomal protein L7	6129			BG389744
217523_at	4.35e-06	5.22e-07	-5.5781	5.73137	-1.26439	CD44	CD44 molecule (Indian blood group)	960			AV700298
204422_s_at	4.35e-06	5.22e-07	-5.57792	5.7307	-2.26156	FGF2	fibroblast growth factor 2	2247			NM_002006
201648_at	4.37e-06	5.25e-07	-5.5764	5.72497	-0.516194	JAK1	Janus kinase 1	3716			AL039831
211272_s_at	4.39e-06	5.28e-07	-5.57525	5.72063	-1.27245	DGKA	diacylglycerol kinase alpha	1606			AF064771
212442_s_at	4.47e-06	5.38e-07	-5.57045	5.70252	-0.689844	CERS6	ceramide synthase 6	253782			BG289001
210188_at	4.47e-06	5.38e-07	-5.57023	5.70168	-1.73827	GABPA	GA binding protein transcription factor alpha subunit	2551			D13318
212307_s_at	4.47e-06	5.39e-07	-5.56986	5.70029	-0.901314	OGT	O-linked N-acetylglucosamine (GlcNAc) transferase	8473
209130_at	4.5e-06	5.42e-07	-5.5682	5.69403	-0.990196	SNAP23	synaptosome associated protein 23	8773			BC003686
46270_at	4.64e-06	5.6e-07	-5.55992	5.66285	-0.585341	UBAP1	ubiquitin associated protein 1	51271			AL039447
206709_x_at	4.66e-06	5.63e-07	-5.55853	5.65758	-1.67288	GPT	glutamic--pyruvic transaminase	2875			NM_005309
205392_s_at	4.74e-06	5.73e-07	-5.55386	5.63999	-1.82456	CCL15-CCL14///CCL14	CCL15-CCL14 readthrough (NMD candidate)///C-C motif chemokine ligand 14	348249///6358
209772_s_at	4.74e-06	5.74e-07	-5.55363	5.63913	-2.32829	CD24	CD24 molecule	100133941			X69397
209126_x_at	4.74e-06	5.74e-07	-5.5534	5.63828	-3.4989	KRT6B	keratin 6B	3854			L42612
37408_at	4.74e-06	5.74e-07	-5.55327	5.63779	-1.13041	MRC2	mannose receptor C type 2	9902			AB014609
204490_s_at	4.76e-06	5.77e-07	-5.55227	5.634	-0.984418	CD44	CD44 molecule (Indian blood group)	960			M24915
221188_s_at	4.82e-06	5.85e-07	-5.54866	5.6204	-0.63779	CIDEB	cell death-inducing DFFA-like effector b	27141			NM_014430
215784_at	4.83e-06	5.86e-07	-5.54814	5.61847	-2.14306	CD1E	CD1e molecule	913
200088_x_at	4.85e-06	5.89e-07	-5.54686	5.61362	-0.630404	NBEAL1///RPL12	neurobeachin like 1///ribosomal protein L12	65065///6136
201185_at	4.85e-06	5.89e-07	-5.54677	5.61331	-1.12053	HTRA1	HtrA serine peptidase 1	5654			NM_002775
206201_s_at	4.87e-06	5.93e-07	-5.54526	5.6076	-2.53699	MEOX2	mesenchyme homeobox 2	4223			NM_005924
205016_at	4.88e-06	5.94e-07	-5.54465	5.6053	-1.15554	TGFA	transforming growth factor alpha	7039			NM_003236
209733_at	4.9e-06	5.96e-07	-5.54376	5.60195	-1.10259	MID2	midline 2	11043
213488_at	4.97e-06	6.06e-07	-5.53942	5.58564	-1.2991	SNED1	sushi, nidogen and EGF like domains 1	25992			N73970
206099_at	5.05e-06	6.17e-07	-5.53494	5.56876	-1.54522	PRKCH	protein kinase C eta	5583			NM_006255
205559_s_at	5.06e-06	6.18e-07	-5.53454	5.56727	-1.58263	PCSK5	proprotein convertase subtilisin/kexin type 5	5125			NM_006200
217149_x_at	5.09e-06	6.23e-07	-5.53242	5.55928	-0.645866	TNK1	tyrosine kinase non receptor 1	8711			AF097738
221757_at	5.12e-06	6.27e-07	-5.53073	5.55294	-0.786646	PIK3IP1	phosphoinositide-3-kinase interacting protein 1	113791
215499_at	5.14e-06	6.29e-07	-5.5297	5.54906	-0.669712	LOC100996792///MAP2K3	dual specificity mitogen-activated protein kinase kinase 3///mitogen-activated protein kinase kinase 3	100996792///5606			AA780381
211623_s_at	5.33e-06	6.54e-07	-5.51976	5.51167	-0.574847	FBL	fibrillarin	2091			M30448
213195_at	5.35e-06	6.56e-07	-5.51889	5.50842	-0.643075	LYRM9	LYR motif containing 9	201229
206109_at	5.35e-06	6.56e-07	-5.51874	5.50786	-0.873438	FUT1	fucosyltransferase 1 (H blood group)	2523			NM_000148
202196_s_at	5.36e-06	6.58e-07	-5.51793	5.50479	-1.99043	DKK3	dickkopf WNT signaling pathway inhibitor 3	27122			NM_013253
221486_at	5.37e-06	6.59e-07	-5.51765	5.50377	-0.49148	ENSA	endosulfine alpha	2029			AF067170
209591_s_at	5.41e-06	6.65e-07	-5.5154	5.4953	-1.56354	BMP7	bone morphogenetic protein 7	655			M60316
203662_s_at	5.42e-06	6.66e-07	-5.51484	5.49319	-2.41341	TMOD1	tropomodulin 1	7111			NM_003275
200596_s_at	5.43e-06	6.67e-07	-5.51453	5.49203	-0.665637	EIF3A	eukaryotic translation initiation factor 3 subunit A	8661			BE614908
218844_at	5.43e-06	6.68e-07	-5.51402	5.49011	-1.07268	ACSF2	acyl-CoA synthetase family member 2	80221			NM_025149
203354_s_at	5.47e-06	6.74e-07	-5.51203	5.48264	-1.79338	PSD3	pleckstrin and Sec7 domain containing 3	23362			AW117368
219916_s_at	5.48e-06	6.76e-07	-5.51123	5.47963	-1.17768	RNF39	ring finger protein 39	80352			NM_025236
217901_at	5.51e-06	6.8e-07	-5.50967	5.47376	-1.61207	DSG2	desmoglein 2	1829			BF031829
207432_at	5.62e-06	6.93e-07	-5.50474	5.45524	-1.24357	BEST2	bestrophin 2	54831			NM_017682
205172_x_at	5.69e-06	7.02e-07	-5.5013	5.44235	-0.921878	CLTB	clathrin light chain B	1212			NM_007097
208456_s_at	5.82e-06	7.19e-07	-5.49507	5.41894	-1.92417	RRAS2	related RAS viral (r-ras) oncogene homolog 2	22800			NM_012250
203711_s_at	5.84e-06	7.22e-07	-5.494	5.41494	-0.96404	HIBCH	3-hydroxyisobutyryl-CoA hydrolase	26275			NM_014362
200025_s_at	5.84e-06	7.23e-07	-5.49379	5.41415	-0.515507	RPL27	ribosomal protein L27	6155	NA	NA	NM_000988
204012_s_at	5.84e-06	7.23e-07	-5.49368	5.41372	-0.658523	LCMT2	leucine carboxyl methyltransferase 2	9836			AL529189
217266_at	5.88e-06	7.29e-07	-5.49162	5.40601	-0.73777	RPL15	ribosomal protein L15	6138
218946_at	5.92e-06	7.34e-07	-5.48983	5.39928	-0.528923	NFU1	NFU1 iron-sulfur cluster scaffold	27247			NM_015700
202794_at	5.93e-06	7.36e-07	-5.48907	5.39644	-0.484304	INPP1	inositol polyphosphate-1-phosphatase	3628			NM_002194
211063_s_at	5.97e-06	7.41e-07	-5.4872	5.38943	-0.6159	NCK1	NCK adaptor protein 1	4690			BC006403
201181_at	6.02e-06	7.49e-07	-5.48458	5.37959	-0.946539	GNAI3	G protein subunit alpha i3	2773			NM_006496
208126_s_at	6.02e-06	7.49e-07	-5.48456	5.3795	-1.1386	CYP2C18	cytochrome P450 family 2 subfamily C member 18	1562			NM_000772
214720_x_at	6.02e-06	7.49e-07	-5.4844	5.37891	-1.12441	SEPT10	septin 10	151011			BF981643
204612_at	6.05e-06	7.54e-07	-5.48291	5.37334	-1.33797	PKIA	protein kinase (cAMP-dependent, catalytic) inhibitor alpha	5569			NM_006823
202719_s_at	6.05e-06	7.54e-07	-5.48275	5.37274	-0.839846	TES	testin LIM domain protein	26136			BC001451
205724_at	6.16e-06	7.67e-07	-5.47821	5.35572	-1.55336	PKP1	plakophilin 1	5317			NM_000299
219233_s_at	6.17e-06	7.69e-07	-5.47762	5.3535	-1.55189	GSDMB	gasdermin B	55876			NM_018530
214696_at	6.19e-06	7.72e-07	-5.47666	5.34989	-1.2758	MIR22///MIR22HG	microRNA 22///MIR22 host gene	407004///84981			AF070569
204948_s_at	6.23e-06	7.79e-07	-5.47438	5.34135	-1.27881	FST	follistatin	10468			NM_013409
215395_x_at	6.44e-06	8.08e-07	-5.46492	5.30588	-1.18723	PRSS3P2	protease, serine 3 pseudogene 2	154754
213201_s_at	6.45e-06	8.1e-07	-5.46418	5.30314	-1.78001	TNNT1	troponin T1, slow skeletal type	7138			AJ011712
222124_at	6.52e-06	8.19e-07	-5.46117	5.29186	-1.50877	HIF3A	hypoxia inducible factor 3 alpha subunit	64344			AK021881
221870_at	6.57e-06	8.25e-07	-5.4593	5.28486	-1.73571	EHD2	EH domain containing 2	30846
219911_s_at	6.57e-06	8.25e-07	-5.45923	5.2846	-0.876763	SLCO4A1	solute carrier organic anion transporter family member 4A1	28231			NM_016354
201998_at	6.57e-06	8.26e-07	-5.45896	5.28357	-1.67278	ST6GAL1	ST6 beta-galactoside alpha-2,6-sialyltransferase 1	6480			AI743792
205348_s_at	6.6e-06	8.31e-07	-5.45752	5.2782	-1.04794	DYNC1I1	dynein cytoplasmic 1 intermediate chain 1	1780			NM_004411
219806_s_at	6.63e-06	8.34e-07	-5.45653	5.27448	-1.6045	SMCO4	single-pass membrane protein with coiled-coil domains 4	56935			NM_020179
209898_x_at	6.66e-06	8.39e-07	-5.45501	5.2688	-0.879812	ITSN2	intersectin 2	50618			U61167
204421_s_at	6.73e-06	8.48e-07	-5.45206	5.25775	-1.50856	FGF2	fibroblast growth factor 2	2247			M27968
202687_s_at	6.73e-06	8.49e-07	-5.45201	5.25755	-1.68505	TNFSF10	tumor necrosis factor superfamily member 10	8743			U57059
207382_at	6.75e-06	8.51e-07	-5.45115	5.25434	-1.38855	TP63	tumor protein p63	8626			NM_003722
209125_at	6.86e-06	8.66e-07	-5.44672	5.23776	-4.20627	KRT6A	keratin 6A	3853			V01516
59375_at	6.86e-06	8.67e-07	-5.44653	5.23705	-0.558014	MYO15B	myosin XVB	80022			AI825877
209596_at	6.88e-06	8.7e-07	-5.44565	5.23378	-1.22443	MXRA5	matrix remodeling associated 5	25878			AF245505
213056_at	6.89e-06	8.72e-07	-5.44505	5.23152	-0.77743	FRMD4B	FERM domain containing 4B	23150			AU145019
203305_at	7.04e-06	8.93e-07	-5.43871	5.20781	-1.7214	F13A1	coagulation factor XIII A chain	2162			NM_000129
208839_s_at	7.04e-06	8.93e-07	-5.43868	5.20769	-0.825861	CAND1	cullin associated and neddylation dissociated 1	55832			AL136810
209905_at	7.07e-06	8.97e-07	-5.43747	5.20316	-1.98523	HOXA10-HOXA9///MIR196B///HOXA9	HOXA10-HOXA9 readthrough///microRNA 196b///homeobox A9	100534589///442920///3205			AI246769
205151_s_at	7.07e-06	8.98e-07	-5.43713	5.20189	-1.23695	TRIL	TLR4 interactor with leucine rich repeats	9865			NM_014817
203006_at	7.07e-06	8.99e-07	-5.43695	5.20124	-0.600829	INPP5A	inositol polyphosphate-5-phosphatase A	3632			NM_005539
218947_s_at	7.09e-06	9.01e-07	-5.43639	5.19913	-0.572373	MTPAP	mitochondrial poly(A) polymerase	55149			NM_018109
212132_at	7.13e-06	9.06e-07	-5.43485	5.19337	-0.559009	LSM14A	LSM14A, mRNA processing body assembly factor	26065			AL117499
213467_at	7.15e-06	9.09e-07	-5.43399	5.19017	-1.61141	RND2	Rho family GTPase 2	8153			BF511718
204900_x_at	7.19e-06	9.16e-07	-5.4321	5.18311	-0.982932	SAP30	Sin3A associated protein 30	8819			NM_003864
212266_s_at	7.25e-06	9.24e-07	-5.42983	5.1746	-0.694294	SRSF5	serine and arginine rich splicing factor 5	6430
214186_s_at	7.28e-06	9.29e-07	-5.42856	5.16985	-1.52406	HCG26	HLA complex group 26 (non-protein coding)	352961			AI346483
218191_s_at	7.28e-06	9.29e-07	-5.42834	5.16906	-0.654577	LMBRD1	LMBR1 domain containing 1	55788			NM_018368
202135_s_at	7.38e-06	9.44e-07	-5.42421	5.15362	-0.618498	ACTR1B	ARP1 actin-related protein 1 homolog B, centractin beta	10120			NM_005735
210192_at	7.51e-06	9.63e-07	-5.41906	5.13439	-1.53799	ATP8A1	ATPase phospholipid transporting 8A1	10396			AB013452
212326_at	7.54e-06	9.67e-07	-5.41791	5.13008	-0.903124	VPS13D	vacuolar protein sorting 13 homolog D	55187			AB007922
219436_s_at	7.62e-06	9.78e-07	-5.41506	5.11945	-1.89439	EMCN	endomucin	51705			NM_016242
217272_s_at	7.66e-06	9.83e-07	-5.41356	5.11386	-2.15023	SERPINB13	serpin family B member 13	5275			AJ001698
201812_s_at	7.74e-06	9.94e-07	-5.41075	5.10338	-0.553015	C4orf46///TOMM7	chromosome 4 open reading frame 46///translocase of outer mitochondrial membrane 7	201725///54543			NM_019059
209098_s_at	7.74e-06	9.95e-07	-5.41054	5.10259	-1.41879	JAG1	jagged 1	182			U61276
219752_at	7.79e-06	1e-06	-5.40878	5.09601	-1.38543	RASAL1	RAS protein activator like 1	8437			NM_004658
209984_at	7.81e-06	1.01e-06	-5.40788	5.09266	-0.52548	KDM4C	lysine demethylase 4C	23081			AB037901
218518_at	7.86e-06	1.01e-06	-5.40583	5.085	-0.6457	FAM13B	family with sequence similarity 13 member B	51306			NM_016603
212753_at	7.86e-06	1.01e-06	-5.40579	5.08485	-0.679136	PCGF3	polycomb group ring finger 3	10336			AI692203
212459_x_at	7.94e-06	1.02e-06	-5.40304	5.07459	-0.536131	SUCLG2	succinate-CoA ligase GDP-forming beta subunit	8801			BF593940
212622_at	8.01e-06	1.03e-06	-5.40035	5.06457	-0.622618	TMEM41B	transmembrane protein 41B	440026			N64760
217617_at	8.09e-06	1.05e-06	-5.39762	5.05439	-1.73382				Transcribed locus	Hs.663061	AW451711
205330_at	8.33e-06	1.08e-06	-5.38934	5.02351	-1.48015	MN1	MN1 proto-oncogene, transcriptional regulator	4330			NM_002430
201243_s_at	8.33e-06	1.08e-06	-5.38926	5.0232	-1.62689	ATP1B1	ATPase Na+/K+ transporting subunit beta 1	481			NM_001677
208066_s_at	8.44e-06	1.09e-06	-5.38559	5.00953	-0.448907	GTF2B	general transcription factor IIB	2959			NM_001514
221760_at	8.6e-06	1.12e-06	-5.38009	4.98906	-1.99217	MAN1A1	mannosidase alpha class 1A member 1	4121			BG287153
208826_x_at	8.6e-06	1.12e-06	-5.38003	4.98884	-0.617696	HINT1	histidine triad nucleotide binding protein 1	3094			U27143
209975_at	8.95e-06	1.17e-06	-5.36862	4.94635	-1.8408	CYP2E1	cytochrome P450 family 2 subfamily E member 1	1571			AF182276
209213_at	9.06e-06	1.18e-06	-5.3653	4.93399	-1.12799	CBR1	carbonyl reductase 1	873			BC002511
217911_s_at	9.06e-06	1.18e-06	-5.36527	4.93389	-0.77447	BAG3	BCL2 associated athanogene 3	9531			NM_004281
205954_at	9.06e-06	1.18e-06	-5.36524	4.93379	-1.40675	RXRG	retinoid X receptor gamma	6258			NM_006917
218765_at	9.06e-06	1.18e-06	-5.36515	4.93342	-1.38394	SIDT2	SID1 transmembrane family member 2	51092
202537_s_at	9.18e-06	1.2e-06	-5.36142	4.91954	-0.602838	CHMP2B	charged multivesicular body protein 2B	25978			AF151842
210908_s_at	9.2e-06	1.2e-06	-5.36088	4.91754	-0.51964	PFDN5	prefoldin subunit 5	5204			AB055804
200862_at	9.23e-06	1.21e-06	-5.3597	4.91318	-1.2793	DHCR24	24-dehydrocholesterol reductase	1718			NM_014762
203874_s_at	9.25e-06	1.21e-06	-5.35901	4.91059	-0.960806	SMARCA1	SWI/SNF related, matrix associated, actin dependent regulator of chromatin, subfamily a, member 1	6594			NM_003069
204188_s_at	9.32e-06	1.22e-06	-5.35689	4.90272	-1.67387	RARG	retinoic acid receptor gamma	5916			M57707
201539_s_at	9.42e-06	1.24e-06	-5.3537	4.89086	-1.22495	FHL1	four and a half LIM domains 1	2273			U29538
217819_at	9.44e-06	1.24e-06	-5.35292	4.88795	-0.443458	GOLGA7	golgin A7	51125			NM_016099
213400_s_at	9.63e-06	1.27e-06	-5.34745	4.86761	-1.01927	TBL1X	transducin (beta)-like 1X-linked	6907			AV753028
202935_s_at	9.65e-06	1.27e-06	-5.34686	4.86544	-1.75162	SOX9	SRY-box 9	6662
205870_at	9.72e-06	1.28e-06	-5.34481	4.8578	-1.42879	BDKRB2	bradykinin receptor B2	624			NM_000623
203197_s_at	9.75e-06	1.28e-06	-5.3439	4.85442	-0.452963	C1orf123	chromosome 1 open reading frame 123	54987
218671_s_at	9.8e-06	1.29e-06	-5.34244	4.849	-0.617452	ATPIF1	ATPase inhibitory factor 1	93974			NM_016311
1438_at	9.83e-06	1.3e-06	-5.34149	4.84549	-1.96406	EPHB3	EPH receptor B3	2049	NA	NA	X75208
213802_at	9.92e-06	1.31e-06	-5.33881	4.83554	-1.83144	PRSS12	protease, serine 12	8492			AI810767
209043_at	9.93e-06	1.31e-06	-5.33852	4.83445	-0.731508	PAPSS1	3'-phosphoadenosine 5'-phosphosulfate synthase 1	9061			AF033026
218544_s_at	9.93e-06	1.31e-06	-5.33844	4.83416	-0.620465	RCL1	RNA terminal phosphate cyclase like 1	10171			NM_005772
220518_at	9.96e-06	1.32e-06	-5.33748	4.83059	-1.78786	ABI3BP	ABI family member 3 binding protein	25890			NM_015429
217902_s_at	9.97e-06	1.32e-06	-5.33706	4.82902	-0.834217	HERC2	HECT and RLD domain containing E3 ubiquitin protein ligase 2	8924			NM_004667
206953_s_at	9.98e-06	1.32e-06	-5.33679	4.82803	-1.7653	ADGRL2	adhesion G protein-coupled receptor L2	23266			NM_012302
201225_s_at	9.99e-06	1.32e-06	-5.3364	4.82658	-0.415102	SRRM1	serine and arginine repetitive matrix 1	10250			NM_005839
201769_at	1.01e-05	1.34e-06	-5.33352	4.81589	-0.943376	CLINT1	clathrin interactor 1	9685			NM_014666
202481_at	1.03e-05	1.36e-06	-5.32841	4.79693	-1.43168	DHRS3	dehydrogenase/reductase 3	9249			NM_004753
208335_s_at	1.03e-05	1.36e-06	-5.32837	4.79676	-2.35934	ACKR1	atypical chemokine receptor 1 (Duffy blood group)	2532			NM_002036
218974_at	1.04e-05	1.38e-06	-5.32534	4.78553	-0.9659	SOBP	sine oculis binding protein homolog	55084			NM_018013
202948_at	1.04e-05	1.38e-06	-5.32487	4.78378	-1.21911	IL1R1	interleukin 1 receptor type 1	3554			NM_000877
218573_at	1.04e-05	1.38e-06	-5.32408	4.78084	-0.904264	MAGEH1	MAGE family member H1	28986			NM_014061
213256_at	1.06e-05	1.4e-06	-5.32067	4.76822	-1.34868	2019-03-03	membrane associated ring-CH-type finger 3	115123			AW593996
213844_at	1.06e-05	1.41e-06	-5.3189	4.76163	-1.36655	HOXA5	homeobox A5	3202			NM_019102
222101_s_at	1.08e-05	1.43e-06	-5.31502	4.74724	-0.979557	DCHS1	dachsous cadherin-related 1	8642			BF222893
208950_s_at	1.09e-05	1.45e-06	-5.31213	4.73655	-0.555293	ALDH7A1	aldehyde dehydrogenase 7 family member A1	501			BC002515
221690_s_at	1.09e-05	1.46e-06	-5.31033	4.72988	-1.71608	NLRP2	NLR family pyrin domain containing 2	55655			AF298547
217725_x_at	1.09e-05	1.46e-06	-5.30985	4.72808	-0.901076	SERBP1	SERPINE1 mRNA binding protein 1	26135			NM_015640
209726_at	1.1e-05	1.47e-06	-5.30806	4.72146	-0.859662	CA11	carbonic anhydrase 11	770			AB018195
215460_x_at	1.12e-05	1.5e-06	-5.30338	4.70411	-0.590889	BRD1	bromodomain containing 1	23774			AL080149
210299_s_at	1.12e-05	1.5e-06	-5.30238	4.7004	-1.58272	FHL1	four and a half LIM domains 1	2273			AF063002
215084_s_at	1.13e-05	1.51e-06	-5.30128	4.69633	-0.996426	LRRC42	leucine rich repeat containing 42	115353
204681_s_at	1.13e-05	1.51e-06	-5.30124	4.6962	-1.67404	RAPGEF5	Rap guanine nucleotide exchange factor 5	9771			NM_012294
201599_at	1.14e-05	1.53e-06	-5.29872	4.68688	-0.655962	OAT	ornithine aminotransferase	4942			NM_000274
205767_at	1.15e-05	1.54e-06	-5.29538	4.67448	-2.2838	EREG	epiregulin	2069			NM_001432
204616_at	1.15e-05	1.55e-06	-5.29441	4.67089	-0.767532	UCHL3	ubiquitin C-terminal hydrolase L3	7347			NM_006002
211423_s_at	1.16e-05	1.56e-06	-5.29327	4.66667	-0.883086	SC5D	sterol-C5-desaturase	6309			D85181
214798_at	1.17e-05	1.57e-06	-5.29133	4.6595	-1.16783	ATP2C2	ATPase secretory pathway Ca2+ transporting 2	9914			AW291664
217971_at	1.17e-05	1.57e-06	-5.29125	4.65922	-0.499985	LAMTOR3	late endosomal/lysosomal adaptor, MAPK and MTOR activator 3	8649			NM_021970
218604_at	1.17e-05	1.58e-06	-5.28969	4.65344	-0.755968	LEMD3	LEM domain containing 3	23592			NM_014319
47530_at	1.18e-05	1.59e-06	-5.28841	4.64869	-0.565755	TRMO	tRNA methyltransferase O	51531			AA748492
200844_s_at	1.18e-05	1.59e-06	-5.28824	4.64809	-0.443024	PRDX6	peroxiredoxin 6	9588			BE869583
202788_at	1.18e-05	1.59e-06	-5.28774	4.64622	-0.59358	MAPKAPK3	mitogen-activated protein kinase-activated protein kinase 3	7867			NM_004635
206581_at	1.18e-05	1.59e-06	-5.28759	4.64566	-1.56263	BNC1	basonuclin 1	646			NM_001717
211834_s_at	1.19e-05	1.61e-06	-5.28463	4.63473	-1.05304	TP63	tumor protein p63	8626			AB042841
214109_at	1.2e-05	1.62e-06	-5.28306	4.62891	-0.546817	LRBA	LPS responsive beige-like anchor protein	987			AI659561
214580_x_at	1.2e-05	1.62e-06	-5.28236	4.6263	-3.82226	KRT6C///KRT6B///KRT6A	keratin 6C///keratin 6B///keratin 6A	286887///3854///3853			AL569511
209835_x_at	1.22e-05	1.65e-06	-5.27731	4.60764	-0.937553	CD44	CD44 molecule (Indian blood group)	960			BC004372
204927_at	1.23e-05	1.66e-06	-5.27657	4.60491	-1.15752	RASSF7	Ras association domain family member 7	8045			NM_003475
216438_s_at	1.23e-05	1.67e-06	-5.27486	4.59859	-1.17583	TMSB4X	thymosin beta 4, X-linked	7114
200817_x_at	1.24e-05	1.67e-06	-5.27435	4.5967	-0.570459	RPS10	ribosomal protein S10	6204			NM_001014
202728_s_at	1.24e-05	1.68e-06	-5.27341	4.59324	-1.56461	LTBP1	latent transforming growth factor beta binding protein 1	4052
218325_s_at	1.24e-05	1.69e-06	-5.27241	4.58953	-0.437288	DIDO1	death inducer-obliterator 1	11083			NM_022105
215963_x_at	1.25e-05	1.7e-06	-5.26976	4.57973	-0.660822	RPL3	ribosomal protein L3	6122
219932_at	1.26e-05	1.71e-06	-5.26896	4.57679	-1.79733	SLC27A6	solute carrier family 27 member 6	28965			NM_014031
206213_at	1.26e-05	1.71e-06	-5.26887	4.57643	-1.29824	WNT10B	Wnt family member 10B	7480			NM_003394
221750_at	1.26e-05	1.71e-06	-5.2686	4.57543	-1.42924	HMGCS1	3-hydroxy-3-methylglutaryl-CoA synthase 1	3157			BG035985
213085_s_at	1.27e-05	1.73e-06	-5.2652	4.56289	-1.06588	WWC1	WW and C2 domain containing 1	23286			AB020676
204442_x_at	1.27e-05	1.73e-06	-5.26517	4.56277	-0.883411	LTBP4	latent transforming growth factor beta binding protein 4	8425			NM_003573
213084_x_at	1.28e-05	1.74e-06	-5.2639	4.55807	-0.549399	SNORD42A///RPL23A	small nucleolar RNA, C/D box 42A///ribosomal protein L23a	26809///6147			BF125158
209099_x_at	1.31e-05	1.79e-06	-5.2563	4.53002	-1.28665	JAG1	jagged 1	182			U73936
207121_s_at	1.32e-05	1.8e-06	-5.25539	4.52668	-1.9581	MAPK6	mitogen-activated protein kinase 6	5597			NM_002748
213927_at	1.32e-05	1.8e-06	-5.25511	4.52563	-1.33939	MAP3K9	mitogen-activated protein kinase kinase kinase 9	4293			AV753204
202555_s_at	1.32e-05	1.8e-06	-5.25468	4.52404	-1.84127	MYLK	myosin light chain kinase	4638
205485_at	1.32e-05	1.8e-06	-5.25461	4.52379	-2.17273	RYR1	ryanodine receptor 1	6261			NM_000540
202213_s_at	1.35e-05	1.85e-06	-5.24846	4.5011	-1.10252	CUL4B	cullin 4B	8450
212325_at	1.35e-05	1.85e-06	-5.24738	4.49711	-1.40583	LIMCH1	LIM and calponin homology domains 1	22998			AK027231
208539_x_at	1.36e-05	1.86e-06	-5.24662	4.49429	-3.1973	SPRR2B	small proline rich protein 2B	6701			NM_006945
218218_at	1.37e-05	1.88e-06	-5.24395	4.48446	-1.07148	APPL2	adaptor protein, phosphotyrosine interacting with PH domain and leucine zipper 2	55198			NM_018171
210790_s_at	1.37e-05	1.88e-06	-5.24362	4.48324	-1.53282	SAR1A	secretion associated Ras related GTPase 1A	56681			BC003658
221669_s_at	1.38e-05	1.9e-06	-5.24107	4.47382	-0.802174	ACAD8	acyl-CoA dehydrogenase family member 8	27034			BC001964
210905_x_at	1.39e-05	1.91e-06	-5.23882	4.46555	-1.26163	POU5F1P4	POU class 5 homeobox 1 pseudogene 4	645682			AF268613
219722_s_at	1.41e-05	1.94e-06	-5.23601	4.45518	-1.01053	GDPD3	glycerophosphodiester phosphodiesterase domain containing 3	79153			NM_024307
211316_x_at	1.43e-05	1.97e-06	-5.23095	4.43652	-0.559562	CFLAR	CASP8 and FADD like apoptosis regulator	8837			AF009616
219263_at	1.44e-05	1.98e-06	-5.22934	4.43061	-2.31871	RNF128	ring finger protein 128, E3 ubiquitin protein ligase	79589			NM_024539
213423_x_at	1.46e-05	2.02e-06	-5.22466	4.41335	-1.06091	TUSC3	tumor suppressor candidate 3	7991
208836_at	1.47e-05	2.03e-06	-5.22306	4.40745	-0.64774	ATP1B3	ATPase Na+/K+ transporting subunit beta 3	483			U51478
203498_at	1.48e-05	2.05e-06	-5.22129	4.40094	-1.01979	RCAN2	regulator of calcineurin 2	10231			NM_005822
204130_at	1.48e-05	2.05e-06	-5.22118	4.40055	-1.64299	HSD11B2	hydroxysteroid 11-beta dehydrogenase 2	3291			NM_000196
221896_s_at	1.49e-05	2.06e-06	-5.21957	4.39463	-0.727913	HIGD1A	HIG1 hypoxia inducible domain family member 1A	25994			BE739519
213880_at	1.49e-05	2.06e-06	-5.2194	4.39399	-2.10251	LGR5	leucine rich repeat containing G protein-coupled receptor 5	8549			AL524520
206042_x_at	1.49e-05	2.06e-06	-5.21893	4.39226	-2.10519	SNURF///SNRPN	SNRPN upstream reading frame///small nuclear ribonucleoprotein polypeptide N	8926///6638			NM_022804
206498_at	1.51e-05	2.09e-06	-5.21622	4.38231	-1.94713	OCA2	OCA2 melanosomal transmembrane protein	4948			NM_000275
216244_at	1.53e-05	2.12e-06	-5.21163	4.36539	-1.69996	IL1RN	interleukin 1 receptor antagonist	3557			BE563442
208952_s_at	1.53e-05	2.13e-06	-5.21133	4.36429	-0.496587	LARP4B	La ribonucleoprotein domain family member 4B	23185			AA811923
209687_at	1.54e-05	2.14e-06	-5.20978	4.35858	-2.21989	CXCL12	C-X-C motif chemokine ligand 12	6387			U19495
213415_at	1.55e-05	2.15e-06	-5.20851	4.35393	-2.16301	CLIC2	chloride intracellular channel 2	1193			AI768628
217475_s_at	1.56e-05	2.16e-06	-5.20679	4.34761	-1.61095	LIMK2	LIM domain kinase 2	3985
32259_at	1.56e-05	2.17e-06	-5.20641	4.3462	-0.471131	EZH1	enhancer of zeste 1 polycomb repressive complex 2 subunit	2145			AB002386
219492_at	1.57e-05	2.19e-06	-5.20382	4.33668	-0.737937	CHIC2	cysteine rich hydrophobic domain 2	26511			NM_012110
201725_at	1.58e-05	2.2e-06	-5.20177	4.32915	-0.410193	CDC123	cell division cycle 123	8872			NM_006023
212271_at	1.59e-05	2.22e-06	-5.20034	4.32387	-1.0583	MAPK1	mitogen-activated protein kinase 1	5594			AA195999
207789_s_at	1.6e-05	2.22e-06	-5.19919	4.31966	-1.06192	DPP6	dipeptidyl peptidase like 6	1804			NM_001936
209291_at	1.6e-05	2.23e-06	-5.19815	4.31584	-1.3724	ID4	inhibitor of DNA binding 4, HLH protein	3400			AW157094
222171_s_at	1.61e-05	2.25e-06	-5.19613	4.3084	-2.55741	PKNOX2	PBX/knotted 1 homeobox 2	63876			AK023792
201678_s_at	1.63e-05	2.27e-06	-5.19397	4.30048	-0.472486	HMCES	5-hydroxymethylcytosine (hmC) binding, ES cell-specific	56941			NM_020187
202949_s_at	1.63e-05	2.28e-06	-5.19253	4.2952	-1.39893	FHL2	four and a half LIM domains 2	2274			NM_001450
219081_at	1.64e-05	2.3e-06	-5.19074	4.28863	-0.479168	ANKHD1-EIF4EBP3///ANKHD1	ANKHD1-EIF4EBP3 readthrough///ankyrin repeat and KH domain containing 1	404734///54882			NM_024668
46256_at	1.64e-05	2.3e-06	-5.19069	4.28843	-0.513442	SPSB3	splA/ryanodine receptor domain and SOCS box containing 3	90864			AA522670
201528_at	1.65e-05	2.3e-06	-5.18993	4.28562	-0.588303	RPA1	replication protein A1	6117			BG398414
219076_s_at	1.66e-05	2.32e-06	-5.18865	4.28092	-1.01953	PXMP2	peroxisomal membrane protein 2	5827			NM_018663
214721_x_at	1.67e-05	2.34e-06	-5.18567	4.26999	-0.797676	CDC42EP4	CDC42 effector protein 4	23580			AL162074
220794_at	1.67e-05	2.34e-06	-5.18553	4.26948	-1.72327	GREM2	gremlin 2, DAN family BMP antagonist	64388			NM_022469
204716_at	1.68e-05	2.35e-06	-5.18494	4.2673	-0.664084	CCDC6	coiled-coil domain containing 6	8030			NM_005436
202476_s_at	1.69e-05	2.37e-06	-5.18296	4.26004	-1.0402	TUBGCP2	tubulin gamma complex associated protein 2	10844
220246_at	1.7e-05	2.38e-06	-5.18124	4.25372	-1.43603	CAMK1D	calcium/calmodulin dependent protein kinase ID	57118			NM_020397
202538_s_at	1.7e-05	2.38e-06	-5.18091	4.25251	-0.949602	CHMP2B	charged multivesicular body protein 2B	25978			NM_014043
204484_at	1.71e-05	2.4e-06	-5.17957	4.24761	-1.21737	PIK3C2B	phosphatidylinositol-4-phosphate 3-kinase catalytic subunit type 2 beta	5287			NM_002646
210827_s_at	1.74e-05	2.45e-06	-5.17387	4.22668	-0.837248	ELF3	E74 like ETS transcription factor 3	1999			U73844
201283_s_at	1.75e-05	2.46e-06	-5.17267	4.2223	-1.62962	TRAK1	trafficking kinesin protein 1	22906			J03068
203494_s_at	1.76e-05	2.48e-06	-5.17077	4.21531	-0.685091	CEP57	centrosomal protein 57	9702			NM_014679
218779_x_at	1.82e-05	2.56e-06	-5.16191	4.18282	-0.763794	EPS8L1	EPS8 like 1	54869			NM_017729
209669_s_at	1.82e-05	2.57e-06	-5.161	4.17951	-0.662915	SERBP1	SERPINE1 mRNA binding protein 1	26135			BC003049
214939_x_at	1.83e-05	2.58e-06	-5.16028	4.17687	-1.47014	AFDN	afadin, adherens junction formation factor	4301			AB011399
207302_at	1.84e-05	2.6e-06	-5.15823	4.16936	-1.51362	SGCG	sarcoglycan gamma	6445			NM_000231
218438_s_at	1.84e-05	2.6e-06	-5.15795	4.16832	-0.760955	MED28	mediator complex subunit 28	80306			NM_025205
209559_at	1.87e-05	2.65e-06	-5.15287	4.1497	-1.18802	HIP1R	huntingtin interacting protein 1 related	9026			AB013384
204791_at	1.89e-05	2.68e-06	-5.14945	4.13719	-0.614566	NR2C1	nuclear receptor subfamily 2 group C member 1	7181			NM_003297
221295_at	1.89e-05	2.69e-06	-5.14923	4.13638	-1.87083	CIDEA	cell death-inducing DFFA-like effector a	1149			NM_001279
205002_at	1.9e-05	2.7e-06	-5.14776	4.13102	-0.732269	AHDC1	AT-hook DNA binding motif containing 1	27245			NM_001029882
209712_at	1.91e-05	2.71e-06	-5.14688	4.12779	-0.579117	SLC35D1	solute carrier family 35 member D1	23169			AI769637
207071_s_at	1.91e-05	2.71e-06	-5.14674	4.12729	-0.681024	ACO1	aconitase 1	48			NM_002197
209711_at	1.91e-05	2.71e-06	-5.14654	4.12654	-0.579145	SLC35D1	solute carrier family 35 member D1	23169			N80922
208009_s_at	1.91e-05	2.72e-06	-5.14616	4.12513	-0.583641	ARHGEF16	Rho guanine nucleotide exchange factor 16	27237			NM_014448
208165_s_at	1.91e-05	2.72e-06	-5.14584	4.12396	-1.56775	PRSS16	protease, serine 16	10279			NM_005865
211824_x_at	1.93e-05	2.75e-06	-5.14345	4.11523	-1.70038	NLRP1	NLR family pyrin domain containing 1	22861			AF229062
219168_s_at	1.93e-05	2.75e-06	-5.14333	4.11479	-1.2208	PRR5	proline rich 5	55615			NM_015366
204119_s_at	1.93e-05	2.75e-06	-5.14279	4.1128	-0.660186	ADK	adenosine kinase	132			U90339
210993_s_at	1.94e-05	2.76e-06	-5.1424	4.11141	-0.940315	SMAD1	SMAD family member 1	4086			U54826
204548_at	1.98e-05	2.83e-06	-5.13526	4.08528	-1.30201	STAR	steroidogenic acute regulatory protein	6770			NM_000349
203034_s_at	1.99e-05	2.84e-06	-5.13459	4.08283	-0.484352	SNORA3A///RPL27A	small nucleolar RNA, H/ACA box 3A///ribosomal protein L27a	619562///6157			NM_000990
206429_at	1.99e-05	2.84e-06	-5.13436	4.08196	-1.58654	F2RL1	F2R like trypsin receptor 1	2150			NM_005242
202536_at	2e-05	2.86e-06	-5.13307	4.07727	-0.946007	CHMP2B	charged multivesicular body protein 2B	25978
218896_s_at	2.01e-05	2.87e-06	-5.13213	4.07381	-0.448092	NCBP3	nuclear cap binding subunit 3	55421
201192_s_at	2.03e-05	2.9e-06	-5.12869	4.06124	-0.635002	PITPNA	phosphatidylinositol transfer protein alpha	5306			NM_006224
205220_at	2.09e-05	3e-06	-5.12017	4.03013	-2.78939	HCAR3	hydroxycarboxylic acid receptor 3	8843			NM_006018
201893_x_at	2.11e-05	3.03e-06	-5.11772	4.02117	-1.66136	DCN	decorin	1634			AF138300
213234_at	2.11e-05	3.03e-06	-5.11756	4.02059	-0.555274	FAM234B	family with sequence similarity 234 member B	57613			AB040900
215294_s_at	2.11e-05	3.03e-06	-5.1172	4.01928	-2.09071	SMARCA1	SWI/SNF related, matrix associated, actin dependent regulator of chromatin, subfamily a, member 1	6594
213410_at	2.12e-05	3.05e-06	-5.11585	4.01434	-0.562881	EDRF1	erythroid differentiation regulatory factor 1	26098			AL050102
214317_x_at	2.13e-05	3.05e-06	-5.11516	4.01183	-1.05671	RPS9	ribosomal protein S9	6203
210646_x_at	2.13e-05	3.06e-06	-5.11469	4.0101	-0.503902	RPL13AP5///SNORD32A///SNORD33///SNORD34///SNORD35A///RPL13A	ribosomal protein L13a pseudogene 5///small nucleolar RNA, C/D box 32A///small nucleolar RNA, C/D box 33///small nucleolar RNA, C/D box 34///small nucleolar RNA, C/D box 35A///ribosomal protein L13a	728658///26819///26818///26817///26816///23521			BC001675
208717_at	2.13e-05	3.06e-06	-5.11462	4.00984	-0.821033	OXA1L	OXA1L, mitochondrial inner membrane protein	5018			BC001669
209270_at	2.15e-05	3.1e-06	-5.11154	3.9986	-0.981258	LAMB3	laminin subunit beta 3	3914			L25541
201665_x_at	2.17e-05	3.11e-06	-5.11002	3.99306	-0.483937	RPS17	ribosomal protein S17	6218			NM_001021
210144_at	2.19e-05	3.16e-06	-5.10644	3.98	-0.642295	TBC1D22A	TBC1 domain family member 22A	25771			AK000851
209513_s_at	2.2e-05	3.17e-06	-5.10564	3.97709	-0.695475	HSDL2	hydroxysteroid dehydrogenase like 2	84263			BC004331
207134_x_at	2.23e-05	3.22e-06	-5.10153	3.96208	-1.51812	TPSB2	tryptase beta 2 (gene/pseudogene)	64499			NM_024164
213340_s_at	2.25e-05	3.25e-06	-5.09845	3.95084	-0.475353	TP73-AS1	TP73 antisense RNA 1	57212
206882_at	2.27e-05	3.28e-06	-5.09656	3.94395	-0.985337	SLC1A6	solute carrier family 1 member 6	6511			NM_005071
211658_at	2.27e-05	3.28e-06	-5.09647	3.94362	-0.969176	PRDX2	peroxiredoxin 2	7001			L19185
212421_at	2.3e-05	3.32e-06	-5.0931	3.93135	-0.75081	KIAA0930	KIAA0930	23313			AB023147
219944_at	2.3e-05	3.33e-06	-5.09217	3.92795	-1.04597	CLIP4	CAP-Gly domain containing linker protein family member 4	79745			NM_024692
210046_s_at	2.31e-05	3.34e-06	-5.09153	3.92563	-1.20045	IDH2	isocitrate dehydrogenase (NADP(+)) 2, mitochondrial	3418			U52144
204730_at	2.31e-05	3.34e-06	-5.09126	3.92463	-1.31817	RIMS3	regulating synaptic membrane exocytosis 3	9783			NM_014747
218508_at	2.32e-05	3.36e-06	-5.0901	3.92043	-0.422654	DCP1A	decapping mRNA 1A	55802			NM_018403
213034_at	2.33e-05	3.37e-06	-5.08879	3.91563	-0.467	SIK3	SIK family kinase 3	23387			AB023216
214533_at	2.34e-05	3.39e-06	-5.08765	3.9115	-1.51042	CMA1	chymase 1	1215			NM_001836
203753_at	2.35e-05	3.42e-06	-5.08544	3.90345	-0.990047	TCF4	transcription factor 4	6925			NM_003199
204818_at	2.36e-05	3.42e-06	-5.08491	3.90151	-2.12101	HSD17B2	hydroxysteroid 17-beta dehydrogenase 2	3294			NM_002153
204834_at	2.37e-05	3.45e-06	-5.08266	3.89332	-1.50146	FGL2	fibrinogen like 2	10875			NM_006682
219137_s_at	2.43e-05	3.53e-06	-5.07636	3.87037	-0.662293	MFF	mitochondrial fission factor	56947			NM_020194
204055_s_at	2.43e-05	3.54e-06	-5.07576	3.86821	-1.57491	CTAGE5	CTAGE family member 5, ER export factor	4253			NM_005930
211938_at	2.47e-05	3.6e-06	-5.0715	3.85268	-0.620478	EIF4B	eukaryotic translation initiation factor 4B	1975			BF247371
208127_s_at	2.47e-05	3.6e-06	-5.07135	3.85216	-0.733859	SOCS5	suppressor of cytokine signaling 5	9655			NM_014011
208634_s_at	2.47e-05	3.61e-06	-5.07051	3.8491	-0.588956	MACF1	microtubule-actin crosslinking factor 1	23499			AB029290
203485_at	2.51e-05	3.67e-06	-5.0664	3.83416	-1.955	RTN1	reticulon 1	6252			NM_021136
201628_s_at	2.56e-05	3.74e-06	-5.06104	3.81464	-0.57341	RRAGA	Ras related GTP binding A	10670			NM_006570
201010_s_at	2.57e-05	3.77e-06	-5.05935	3.80851	-0.784929	TXNIP	thioredoxin interacting protein	10628			NM_006472
216304_x_at	2.59e-05	3.79e-06	-5.05769	3.80249	-0.82352	YME1L1	YME1 like 1 ATPase	10730			AJ295618
211023_at	2.59e-05	3.8e-06	-5.05712	3.80041	-0.531666	PDHB	pyruvate dehydrogenase (lipoamide) beta	5162			AL117618
219046_s_at	2.6e-05	3.82e-06	-5.05581	3.79567	-1.2151	PKNOX2	PBX/knotted 1 homeobox 2	63876			NM_022062
203110_at	2.62e-05	3.85e-06	-5.05368	3.78791	-0.770499	PTK2B	protein tyrosine kinase 2 beta	2185			U43522
213058_at	2.64e-05	3.89e-06	-5.05087	3.77772	-0.556657	TTC28	tetratricopeptide repeat domain 28	23331
205437_at	2.65e-05	3.89e-06	-5.05051	3.7764	-0.871539	ZNF211	zinc finger protein 211	10520			NM_006385
205908_s_at	2.67e-05	3.93e-06	-5.04801	3.76733	-1.83808	OMD	osteomodulin	4958			NM_005014
204249_s_at	2.68e-05	3.95e-06	-5.04638	3.76142	-1.09438	LMO2	LIM domain only 2	4005			NM_005574
219314_s_at	2.7e-05	3.99e-06	-5.04403	3.75288	-0.726363	ZNF219	zinc finger protein 219	51222			NM_016423
205898_at	2.71e-05	4e-06	-5.04315	3.74969	-1.7143	CX3CR1	C-X3-C motif chemokine receptor 1	1524			U20350
201076_at	2.72e-05	4.02e-06	-5.0422	3.74623	-0.65482	SNU13	SNU13 homolog, small nuclear ribonucleoprotein (U4/U6.U5)	4809			NM_005008
219873_at	2.72e-05	4.02e-06	-5.04215	3.74603	-1.09889	COLEC11	collectin subfamily member 11	78989			NM_024027
201866_s_at	2.74e-05	4.05e-06	-5.04024	3.73912	-0.552929	NR3C1	nuclear receptor subfamily 3 group C member 1	2908			NM_000176
220703_at	2.75e-05	4.07e-06	-5.03867	3.73343	-0.983384	IDI2-AS1	IDI2 antisense RNA 1	55853
201548_s_at	2.77e-05	4.1e-06	-5.03639	3.72515	-0.515315	KDM5B	lysine demethylase 5B	10765			W02593
206329_at	2.77e-05	4.11e-06	-5.03631	3.72487	-2.51256	EXTL1	exostosin like glycosyltransferase 1	2134			NM_004455
213271_s_at	2.79e-05	4.13e-06	-5.03452	3.71835	-0.58983	DOPEY1	dopey family member 1	23033			AB029040
201215_at	2.8e-05	4.15e-06	-5.03332	3.71402	-0.540387	PLS3	plastin 3	5358			NM_005032
218005_at	2.8e-05	4.15e-06	-5.03331	3.71399	-1.16014	ZNF22	zinc finger protein 22	7570			AA744771
215695_s_at	2.8e-05	4.15e-06	-5.03325	3.71375	-1.26366	GYG2	glycogenin 2	8908			U94357
219276_x_at	2.83e-05	4.2e-06	-5.03009	3.70229	-0.63581	CAAP1	caspase activity and apoptosis inhibitor 1	79886			NM_024828
200933_x_at	2.87e-05	4.26e-06	-5.02667	3.68992	-0.529744	RPS4X	ribosomal protein S4, X-linked	6191			NM_001007
220124_at	2.87e-05	4.26e-06	-5.02667	3.6899	-2.02358	GAN	gigaxonin	8139			NM_022041
212851_at	2.9e-05	4.3e-06	-5.02377	3.67941	-0.551355	DCUN1D4	defective in cullin neddylation 1 domain containing 4	23142			AA194584
217746_s_at	2.9e-05	4.31e-06	-5.02316	3.67718	-0.428852	PDCD6IP	programmed cell death 6 interacting protein	10015			NM_013374
200779_at	2.92e-05	4.35e-06	-5.02102	3.66944	-0.454641	ATF4	activating transcription factor 4	468			NM_001675
201462_at	2.93e-05	4.36e-06	-5.02012	3.66617	-1.21744	SCRN1	secernin 1	9805			NM_014766
202365_at	2.94e-05	4.37e-06	-5.01945	3.66376	-0.512228	UNC119B	unc-119 lipid binding chaperone B	84747			BC004815
201565_s_at	2.94e-05	4.38e-06	-5.01904	3.66226	-1.11029	ID2	inhibitor of DNA binding 2, HLH protein	3398			NM_002166
220795_s_at	2.95e-05	4.39e-06	-5.01851	3.66036	-0.777158	BEGAIN	brain enriched guanylate kinase associated	57596			NM_020836
203700_s_at	2.95e-05	4.39e-06	-5.01837	3.65984	-1.06112	DIO2	deiodinase, iodothyronine, type II	1734			NM_013989
210681_s_at	2.97e-05	4.43e-06	-5.01605	3.65144	-0.670527	MIR6125///USP15	microRNA 6125///ubiquitin specific peptidase 15	102465133///9958			AF153604
205530_at	2.97e-05	4.43e-06	-5.01578	3.65047	-1.15802	ETFDH	electron transfer flavoprotein dehydrogenase	2110			NM_004453
215425_at	2.99e-05	4.46e-06	-5.01426	3.64495	-1.03843	BTG3	BTG anti-proliferation factor 3	10950			AL049332
202466_at	2.99e-05	4.46e-06	-5.01422	3.6448	-0.528642	PAPD7	poly(A) RNA polymerase D7, non-canonical	11044			NM_006999
207043_s_at	3.01e-05	4.49e-06	-5.01233	3.63797	-1.52716	SLC6A9	solute carrier family 6 member 9	6536			NM_006934
208078_s_at	3.03e-05	4.52e-06	-5.01037	3.63086	-1.01007	SIK1	salt inducible kinase 1	150094			NM_030751
211864_s_at	3.03e-05	4.53e-06	-5.00979	3.62879	-1.3462	MYOF	myoferlin	26509			AF207990
218262_at	3.06e-05	4.57e-06	-5.00764	3.62099	-0.420263	RMND5B	required for meiotic nuclear division 5 homolog B	64777			NM_022762
221127_s_at	3.07e-05	4.59e-06	-5.00622	3.61584	-1.60102	DKK3	dickkopf WNT signaling pathway inhibitor 3	27122
216388_s_at	3.08e-05	4.61e-06	-5.00544	3.61304	-1.88258	LTB4R	leukotriene B4 receptor	1241			U33448
218126_at	3.08e-05	4.61e-06	-5.00542	3.61296	-0.581251	RMDN3	regulator of microtubule dynamics 3	55177			NM_018145
39650_s_at	3.1e-05	4.65e-06	-5.00325	3.60509	-0.759646	PCNX2	pecanex homolog 2 (Drosophila)	80003			AB007895
211998_at	3.12e-05	4.68e-06	-5.00147	3.59869	-0.995023	MIR4738///H3F3B///H3F3A	microRNA 4738///H3 histone, family 3B///H3 histone, family 3A	100616282///3021///3020			AW138159
214680_at	3.14e-05	4.71e-06	-4.99948	3.59149	-1.3645	NTRK2	neurotrophic receptor tyrosine kinase 2	4915			BF674712
212382_at	3.14e-05	4.71e-06	-4.99933	3.59092	-1.11102	TCF4	transcription factor 4	6925			BF433429
206030_at	3.16e-05	4.74e-06	-4.99759	3.58464	-0.972219	ASPA	aspartoacylase	443			NM_000049
212230_at	3.18e-05	4.79e-06	-4.99529	3.57634	-1.24916	PLPP3	phospholipid phosphatase 3	8613			AV725664
202443_x_at	3.19e-05	4.79e-06	-4.99493	3.57501	-0.539874	NOTCH2	notch 2	4853			AA291203
206774_at	3.19e-05	4.8e-06	-4.99466	3.57405	-1.45166	FRMPD1	FERM and PDZ domain containing 1	22844			NM_014907
217023_x_at	3.21e-05	4.84e-06	-4.99247	3.56615	-2.20037	TPSB2///TPSAB1	tryptase beta 2 (gene/pseudogene)///tryptase alpha/beta 1	64499///7177			AF099143
202978_s_at	3.22e-05	4.85e-06	-4.99182	3.56379	-0.978081	CREBZF	CREB/ATF bZIP transcription factor	58487			AW204564
219763_at	3.22e-05	4.86e-06	-4.99139	3.56222	-1.2221	DENND1A	DENN domain containing 1A	57706			NM_024820
218067_s_at	3.25e-05	4.91e-06	-4.98852	3.55187	-0.755566	ARGLU1	arginine and glutamate rich 1	55082			NM_018011
212339_at	3.26e-05	4.92e-06	-4.98787	3.5495	-1.50834	EPB41L1	erythrocyte membrane protein band 4.1 like 1	2036
212010_s_at	3.27e-05	4.95e-06	-4.98636	3.54408	-0.437454	CDV3	CDV3 homolog	55573
219121_s_at	3.32e-05	5.01e-06	-4.98296	3.5318	-1.98132	ESRP1	epithelial splicing regulatory protein 1	54845			NM_017697
212764_at	3.32e-05	5.02e-06	-4.98255	3.5303	-1.13039	ZEB1	zinc finger E-box binding homeobox 1	6935			AI806174
202411_at	3.32e-05	5.02e-06	-4.98224	3.52919	-2.1539	IFI27	interferon alpha inducible protein 27	3429			NM_005532
209060_x_at	3.35e-05	5.07e-06	-4.97961	3.51967	-0.652317	NCOA3	nuclear receptor coactivator 3	8202			AI438999
209203_s_at	3.36e-05	5.08e-06	-4.97922	3.5183	-1.24657	BICD2	BICD cargo adaptor 2	23299			BC002327
51192_at	3.36e-05	5.08e-06	-4.97899	3.51744	-0.633932	SSH3	slingshot protein phosphatase 3	54961			AA134926
204606_at	3.36e-05	5.09e-06	-4.97878	3.5167	-1.85436	CCL21	C-C motif chemokine ligand 21	6366			NM_002989
205450_at	3.38e-05	5.12e-06	-4.97692	3.50998	-1.78464	PHKA1	phosphorylase kinase regulatory subunit alpha 1	5255			NM_002637
209377_s_at	3.42e-05	5.19e-06	-4.97351	3.49769	-0.580727	HMGN3	high mobility group nucleosomal binding domain 3	9324			AF274949
220953_s_at	3.44e-05	5.23e-06	-4.97151	3.49045	-0.567705	MTMR12	myotubularin related protein 12	54545
215270_at	3.45e-05	5.25e-06	-4.97065	3.48735	-1.27523	LFNG	LFNG O-fucosylpeptide 3-beta-N-acetylglucosaminyltransferase	3955			U94354
211569_s_at	3.45e-05	5.25e-06	-4.97063	3.48728	-0.614119	HADH	hydroxyacyl-CoA dehydrogenase	3033			AF001903
211427_s_at	3.48e-05	5.29e-06	-4.96836	3.47911	-2.56772	KCNJ13	potassium voltage-gated channel subfamily J member 13	3769			AB013889
36019_at	3.5e-05	5.32e-06	-4.96665	3.47294	-0.355804	STK19	serine/threonine kinase 19	8859			L26260
217472_at	3.51e-05	5.34e-06	-4.96563	3.46926	-1.3075						J02963
213970_at	3.52e-05	5.36e-06	-4.96507	3.46724	-1.02219	RABL3	RAB, member of RAS oncogene family like 3	285282			AA744682
205619_s_at	3.52e-05	5.36e-06	-4.96506	3.4672	-1.11593	MEOX1	mesenchyme homeobox 1	4222			NM_004527
221723_s_at	3.52e-05	5.37e-06	-4.96447	3.46506	-1.15401	SLC4A5	solute carrier family 4 member 5	57835			AF243499
215380_s_at	3.58e-05	5.45e-06	-4.96024	3.44982	-0.732332	GGCT	gamma-glutamylcyclotransferase	79017			AK021779
215206_at	3.65e-05	5.57e-06	-4.95457	3.42941	-0.846086				CDNA: FLJ21490 fis, clone COL05464	Hs.677325	AK025143
219678_x_at	3.73e-05	5.7e-06	-4.94845	3.40736	-0.663549	DCLRE1C	DNA cross-link repair 1C	64421			NM_022487
221940_at	3.75e-05	5.73e-06	-4.94695	3.40198	-1.28869	RPUSD2	RNA pseudouridylate synthase domain containing 2	27079
215165_x_at	3.75e-05	5.74e-06	-4.94634	3.39977	-0.526682	UMPS	uridine monophosphate synthetase	7372			AL080099
202704_at	3.76e-05	5.75e-06	-4.94573	3.39757	-0.852553	TOB1	transducer of ERBB2, 1	10140			AA675892
207455_at	3.78e-05	5.78e-06	-4.9443	3.39245	-1.24406	P2RY1	purinergic receptor P2Y1	5028			NM_002563
206310_at	3.81e-05	5.85e-06	-4.94152	3.38243	-1.08685	SPINK2	serine peptidase inhibitor, Kazal type 2	6691			NM_021114
208476_s_at	3.82e-05	5.86e-06	-4.94093	3.38029	-0.952172	FRMD4A	FERM domain containing 4A	55691			NM_018027
212980_at	3.82e-05	5.86e-06	-4.94065	3.3793	-1.17775	AHSA2	AHA1, activator of heat shock 90kDa protein ATPase homolog 2 (yeast)	130872			AL050376
204688_at	3.9e-05	6e-06	-4.93454	3.35733	-1.22351	SGCE	sarcoglycan epsilon	8910			NM_003919
203705_s_at	3.91e-05	6.01e-06	-4.9342	3.3561	-0.814889	FZD7	frizzled class receptor 7	8324			AI333651
31845_at	3.91e-05	6.01e-06	-4.93389	3.35501	-0.9448	ELF4	E74 like ETS transcription factor 4	2000			U32645
217781_s_at	3.94e-05	6.07e-06	-4.93139	3.34601	-0.972389	ZNF106	zinc finger protein 106	64397			NM_022473
213470_s_at	3.97e-05	6.11e-06	-4.92974	3.34009	-1.41732	HNRNPH1	heterogeneous nuclear ribonucleoprotein H1 (H)	3187			BF983406
201213_at	4.04e-05	6.22e-06	-4.92475	3.32215	-1.31913	PPP1R7	protein phosphatase 1 regulatory subunit 7	5510			AI090331
214188_at	4.04e-05	6.22e-06	-4.92469	3.32194	-1.57719
204547_at	4.05e-05	6.25e-06	-4.92368	3.31829	-0.763086	RAB40B	RAB40B, member RAS oncogene family	10966			NM_006822
218995_s_at	4.06e-05	6.26e-06	-4.92294	3.31564	-1.58388	EDN1	endothelin 1	1906			NM_001955
209019_s_at	4.06e-05	6.27e-06	-4.92279	3.31512	-0.49072	PINK1	PTEN induced putative kinase 1	65018			AF316873
219067_s_at	4.16e-05	6.44e-06	-4.91559	3.28927	-0.841113	NSMCE4A	NSE4 homolog A, SMC5-SMC6 complex component	54780			NM_017615
212931_at	4.2e-05	6.5e-06	-4.91271	3.27891	-0.585381	TCF20	transcription factor 20	6942			AB006630
202037_s_at	4.27e-05	6.61e-06	-4.90816	3.2626	-1.44812	SFRP1	secreted frizzled related protein 1	6422			NM_003012
222121_at	4.33e-05	6.72e-06	-4.90393	3.24745	-1.72779	ARHGEF26	Rho guanine nucleotide exchange factor 26	26084			AU118383
200931_s_at	4.34e-05	6.73e-06	-4.90357	3.24614	-0.459872	VCL	vinculin	7414			NM_014000
205554_s_at	4.34e-05	6.74e-06	-4.90303	3.24419	-0.833028	DNASE1L3	deoxyribonuclease 1 like 3	1776			NM_004944
205527_s_at	4.45e-05	6.92e-06	-4.89601	3.21904	-1.25245	GEMIN4	gem nuclear organelle associated protein 4	50628			NM_015721
205848_at	4.49e-05	6.99e-06	-4.89324	3.20912	-1.8694	GAS2	growth arrest specific 2	2620			NM_005256
202458_at	4.49e-05	6.99e-06	-4.89317	3.20888	-1.23983	PRSS23	protease, serine 23	11098			NM_007173
216959_x_at	4.55e-05	7.08e-06	-4.88967	3.19633	-0.812779	NRCAM	neuronal cell adhesion molecule	4897			U55258
207505_at	4.55e-05	7.09e-06	-4.88943	3.19548	-1.12848	PRKG2	protein kinase, cGMP-dependent, type II	5593			NM_006259
212037_at	4.58e-05	7.14e-06	-4.88734	3.18801	-0.696327	PNN	pinin, desmosome associated protein	5411			BF508848
209005_at	4.6e-05	7.18e-06	-4.88585	3.18268	-0.809888	FBXL5	F-box and leucine rich repeat protein 5	26234			AF157323
203137_at	4.61e-05	7.19e-06	-4.88562	3.18185	-0.85842	WTAP	Wilms tumor 1 associated protein	9589			NM_004906
219572_at	4.67e-05	7.3e-06	-4.88142	3.16682	-1.00499	CADPS2	calcium dependent secretion activator 2	93664			NM_017954
220042_x_at	4.68e-05	7.32e-06	-4.88082	3.16468	-1.18966	HIVEP3	human immunodeficiency virus type I enhancer binding protein 3	59269			NM_024503
213094_at	4.7e-05	7.36e-06	-4.87923	3.15899	-1.21938	ADGRG6	adhesion G protein-coupled receptor G6	57211
205872_x_at	4.7e-05	7.37e-06	-4.87911	3.15855	-2.08241	PDE4DIP	phosphodiesterase 4D interacting protein	9659			NM_022359
211755_s_at	4.71e-05	7.38e-06	-4.87854	3.15651	-0.547767	ATP5F1	ATP synthase, H+ transporting, mitochondrial Fo complex subunit B1	515			BC005960
208936_x_at	4.71e-05	7.39e-06	-4.87837	3.1559	-0.840308	LGALS8	galectin 8	3964			AF074000
206481_s_at	4.73e-05	7.43e-06	-4.87687	3.15054	-1.67555	LDB2	LIM domain binding 2	9079			NM_001290
201572_x_at	4.74e-05	7.44e-06	-4.87644	3.14901	-0.44516	DCTD	dCMP deaminase	1635			NM_001921
221500_s_at	4.74e-05	7.44e-06	-4.87642	3.14893	-0.502319	STX16	syntaxin 16	8675			BE782754
206662_at	4.76e-05	7.47e-06	-4.8753	3.14492	-1.44932	GLRX	glutaredoxin	2745			NM_002064
209541_at	4.77e-05	7.49e-06	-4.87457	3.1423	-1.43526	IGF1	insulin like growth factor 1	3479
217963_s_at	4.8e-05	7.55e-06	-4.87228	3.13412	-0.785516	BEX3	brain expressed X-linked 3	27018			NM_014380
216224_s_at	4.8e-05	7.55e-06	-4.87223	3.13394	-1.23922	HDAC6	histone deacetylase 6	10013
203906_at	4.82e-05	7.59e-06	-4.87094	3.12933	-0.890294	IQSEC1	IQ motif and Sec7 domain 1	9922
211930_at	4.94e-05	7.79e-06	-4.86406	3.10473	-0.587867	HNRNPA3	heterogeneous nuclear ribonucleoprotein A3	220988
216588_at	4.95e-05	7.81e-06	-4.86332	3.1021	-1.37372
220735_s_at	4.95e-05	7.82e-06	-4.86301	3.10099	-1.63546	SENP7	SUMO1/sentrin specific peptidase 7	57337			NM_020654
201960_s_at	4.95e-05	7.82e-06	-4.86286	3.10045	-0.648995	MYCBP2	MYC binding protein 2, E3 ubiquitin protein ligase	23077			NM_015057
212970_at	4.98e-05	7.87e-06	-4.86101	3.09385	-0.457811	APBB2	amyloid beta precursor protein binding family B member 2	323			AI694303
212224_at	4.99e-05	7.88e-06	-4.86069	3.09271	-2.46533	ALDH1A1	aldehyde dehydrogenase 1 family member A1	216			NM_000689
220780_at	4.99e-05	7.89e-06	-4.86061	3.09245	-1.57872	PLA2G3	phospholipase A2 group III	50487			NM_015715
215411_s_at	5.01e-05	7.92e-06	-4.8594	3.0881	-0.624662	TRAF3IP2	TRAF3 interacting protein 2	10758
203130_s_at	5.05e-05	7.99e-06	-4.85704	3.07969	-1.10459	KIF5C	kinesin family member 5C	3800			NM_004522
206480_at	5.05e-05	8e-06	-4.85668	3.07839	-1.362	LTC4S	leukotriene C4 synthase	4056
205030_at	5.06e-05	8.01e-06	-4.85631	3.07709	-1.56866	FABP7	fatty acid binding protein 7	2173			NM_001446
208908_s_at	5.15e-05	8.17e-06	-4.85099	3.05811	-0.518069	CAST	calpastatin	831			AF327443
213313_at	5.2e-05	8.26e-06	-4.84809	3.04774	-0.478508	RABGAP1	RAB GTPase activating protein 1	23637			AI922519
204615_x_at	5.21e-05	8.27e-06	-4.84784	3.04687	-0.663209	IDI1	isopentenyl-diphosphate delta isomerase 1	3422			NM_004508
202470_s_at	5.24e-05	8.33e-06	-4.84584	3.03974	-1.4564	CPSF6	cleavage and polyadenylation specific factor 6	11052			NM_007007
212998_x_at	5.26e-05	8.36e-06	-4.84463	3.03541	-2.99577	LOC101060835///HLA-DQB1	HLA class II histocompatibility antigen, DQ beta 1 chain-like///major histocompatibility complex, class II, DQ beta 1	101060835///3119
219525_at	5.27e-05	8.37e-06	-4.84432	3.03431	-1.70044	SLC47A1	solute carrier family 47 member 1	55244			NM_018242
218484_at	5.4e-05	8.59e-06	-4.83731	3.00933	-1.14207	NDUFA4L2	NDUFA4, mitochondrial complex associated like 2	56901			NM_020142
203843_at	5.45e-05	8.68e-06	-4.83454	2.99945	-0.619771	RPS6KA3	ribosomal protein S6 kinase A3	6197			AA906056
211813_x_at	5.53e-05	8.82e-06	-4.83028	2.98429	-1.9182	DCN	decorin	1634			AF138303
217979_at	5.53e-05	8.83e-06	-4.82989	2.9829	-1.05146	TSPAN13	tetraspanin 13	27075			NM_014399
219964_at	5.54e-05	8.85e-06	-4.82927	2.9807	-1.16728	ST7L	suppression of tumorigenicity 7 like	54879			NM_017744
204090_at	5.58e-05	8.92e-06	-4.82709	2.97292	-0.791715	STK19	serine/threonine kinase 19	8859			NM_004197
221556_at	5.66e-05	9.06e-06	-4.82306	2.95857	-0.594323	CDC14B	cell division cycle 14B	8555			BF792631
206910_x_at	5.68e-05	9.09e-06	-4.822	2.95481	-1.01612	CFHR2	complement factor H related 2	3080			NM_005666
35254_at	5.68e-05	9.09e-06	-4.82196	2.95467	-0.597516	TRAFD1	TRAF-type zinc finger domain containing 1	10906			AB007447
217767_at	5.74e-05	9.19e-06	-4.81892	2.94387	-3.11185	C3	complement component 3	718			NM_000064
206382_s_at	5.75e-05	9.21e-06	-4.81836	2.94186	-1.53334	BDNF	brain derived neurotrophic factor	627			NM_001709
219092_s_at	5.76e-05	9.25e-06	-4.8173	2.93808	-0.850764	IPPK	inositol-pentakisphosphate 2-kinase	64768			NM_022755
218527_at	5.77e-05	9.26e-06	-4.81704	2.93717	-0.401239	APTX	aprataxin	54840
212114_at	5.77e-05	9.26e-06	-4.81694	2.93682	-0.519022	ATXN7L3B	ataxin 7 like 3B	552889			BE967207
219122_s_at	5.77e-05	9.27e-06	-4.81683	2.93643	-0.617805	THG1L	tRNA-histidine guanylyltransferase 1 like	54974			NM_017872
208264_s_at	5.79e-05	9.31e-06	-4.81546	2.93155	-0.679219	EIF3J	eukaryotic translation initiation factor 3 subunit J	8669			NM_003758
203537_at	5.8e-05	9.34e-06	-4.81479	2.92916	-0.488871	PRPSAP2	phosphoribosyl pyrophosphate synthetase associated protein 2	5636			NM_002767
211575_s_at	5.82e-05	9.36e-06	-4.81401	2.9264	-0.733146	UBE3A	ubiquitin protein ligase E3A	7337			AF116702
214629_x_at	5.83e-05	9.39e-06	-4.81313	2.92326	-0.540395	RTN4	reticulon 4	57142			AF320999
216947_at	5.84e-05	9.4e-06	-4.81283	2.92219	-1.42768	DES	desmin	1674
203778_at	5.86e-05	9.44e-06	-4.81167	2.91806	-0.685078	MANBA	mannosidase beta	4126			NM_005908
211509_s_at	5.86e-05	9.45e-06	-4.81159	2.91781	-0.44201	RTN4	reticulon 4	57142			AB015639
211361_s_at	5.87e-05	9.46e-06	-4.81115	2.91622	-1.95916	SERPINB13	serpin family B member 13	5275			AJ001696
40524_at	5.92e-05	9.55e-06	-4.80869	2.9075	-1.34431	PTPN21	protein tyrosine phosphatase, non-receptor type 21	11099			X79510
205229_s_at	5.93e-05	9.57e-06	-4.80816	2.90559	-1.60312	COCH	cochlin	1690
217690_at	5.93e-05	9.57e-06	-4.80789	2.90466	-0.946545	ENOSF1	enolase superfamily member 1	55556			BG281679
203845_at	5.93e-05	9.58e-06	-4.80774	2.90413	-1.18074	KAT2B	lysine acetyltransferase 2B	8850			AV727449
219515_at	6.01e-05	9.7e-06	-4.80431	2.89193	-0.703079	PRDM10	PR/SET domain 10	56980			NM_020228
201768_s_at	6.02e-05	9.73e-06	-4.80347	2.88895	-0.557438	CLINT1	clathrin interactor 1	9685			BC004467
200809_x_at	6.05e-05	9.8e-06	-4.80169	2.88261	-0.572846	RPL12	ribosomal protein L12	6136			NM_000976
214975_s_at	6.08e-05	9.84e-06	-4.80049	2.87836	-1.46049	MTMR1	myotubularin related protein 1	8776
212926_at	6.1e-05	9.88e-06	-4.79933	2.87424	-0.729661	SMC5	structural maintenance of chromosomes 5	23137
210148_at	6.12e-05	9.92e-06	-4.79827	2.8705	-1.6674	HIPK3	homeodomain interacting protein kinase 3	10114			AF305239
219582_at	6.14e-05	9.95e-06	-4.79741	2.86742	-1.3917	OGFRL1	opioid growth factor receptor like 1	79627			NM_024576
203712_at	6.15e-05	9.98e-06	-4.7967	2.8649	-0.545907	PUM3	pumilio RNA binding family member 3	9933			NM_014878
210389_x_at	6.24e-05	1.01e-05	-4.79256	2.85023	-0.666855	TUBD1	tubulin delta 1	51174			BC000258
212084_at	6.29e-05	1.02e-05	-4.79038	2.8425	-1.17989	TEX261	testis expressed 261	113419			AV759552
208485_x_at	6.33e-05	1.03e-05	-4.78857	2.83607	-0.665682	CFLAR	CASP8 and FADD like apoptosis regulator	8837			NM_003879
201296_s_at	6.34e-05	1.03e-05	-4.78774	2.83311	-0.708019	WSB1	WD repeat and SOCS box containing 1	26118			NM_015626
219341_at	6.46e-05	1.05e-05	-4.78264	2.81503	-1.4256	CLN8	ceroid-lipofuscinosis, neuronal 8	2055			NM_018941
208834_x_at	6.47e-05	1.05e-05	-4.78185	2.81223	-0.507408	SNORD42A///RPL23A	small nucleolar RNA, C/D box 42A///ribosomal protein L23a	26809///6147
202379_s_at	6.49e-05	1.06e-05	-4.78092	2.80894	-0.893285	NKTR	natural killer cell triggering receptor	4820
200952_s_at	6.54e-05	1.07e-05	-4.77868	2.80102	-1.39454	CCND2	cyclin D2	894
65630_at	6.55e-05	1.07e-05	-4.77848	2.80031	-0.636249	TMEM80	transmembrane protein 80	283232			AI742455
218078_s_at	6.55e-05	1.07e-05	-4.77802	2.79866	-0.65532	ZDHHC3	zinc finger DHHC-type containing 3	51304			NM_016598
218503_at	6.57e-05	1.07e-05	-4.77723	2.79587	-0.930945	FOCAD	focadhesin	54914			NM_017794
205579_at	6.58e-05	1.07e-05	-4.777	2.79506	-1.08087	HRH1	histamine receptor H1	3269			NM_000861
213693_s_at	6.59e-05	1.07e-05	-4.77641	2.79296	-1.73375	MUC1	mucin 1, cell surface associated	4582
205372_at	6.6e-05	1.08e-05	-4.77588	2.7911	-1.41154	PLAG1	PLAG1 zinc finger	5324			NM_002655
220591_s_at	6.62e-05	1.08e-05	-4.7747	2.78691	-0.640545	EFHC2	EF-hand domain containing 2	80258			NM_025184
212062_at	6.67e-05	1.09e-05	-4.77233	2.77852	-0.974423	ATP9A	ATPase phospholipid transporting 9A (putative)	10079			AB014511
208953_at	6.71e-05	1.1e-05	-4.77063	2.7725	-0.927997	LARP4B	La ribonucleoprotein domain family member 4B	23185			AU154358
204614_at	6.76e-05	1.11e-05	-4.76836	2.76446	-2.38375	SERPINB2	serpin family B member 2	5055			NM_002575
201630_s_at	6.77e-05	1.11e-05	-4.76784	2.76261	-0.341839	ACP1	acid phosphatase 1, soluble	52			NM_004300
220625_s_at	6.78e-05	1.11e-05	-4.76732	2.76078	-1.69773	ELF5	E74 like ETS transcription factor 5	2001			AF115403
214532_x_at	6.82e-05	1.12e-05	-4.76578	2.75534	-1.13237	POU5F1B	POU class 5 homeobox 1B	5462			AF268615
209583_s_at	6.85e-05	1.12e-05	-4.76454	2.75096	-1.07317	CD200	CD200 molecule	4345			AF063591
215506_s_at	6.88e-05	1.13e-05	-4.76304	2.74566	-1.23703	DIRAS3	DIRAS family GTPase 3	9077
209970_x_at	6.9e-05	1.13e-05	-4.76238	2.74331	-1.06909	CASP1	caspase 1	834			M87507
201904_s_at	6.9e-05	1.13e-05	-4.76221	2.74271	-0.802364	CTDSPL	CTD small phosphatase like	10217			BF031714
203293_s_at	6.93e-05	1.14e-05	-4.76107	2.73867	-1.33184	LMAN1	lectin, mannose binding 1	3998			NM_005570
206140_at	6.99e-05	1.15e-05	-4.75859	2.7299	-2.44105	LHX2	LIM homeobox 2	9355			NM_004789
214148_at	7e-05	1.15e-05	-4.75794	2.72761	-0.727109	LOC100507424///ITFG2	uncharacterized LOC100507424///integrin alpha FG-GAP repeat containing 2	100507424///55846			U90917
202730_s_at	7.11e-05	1.17e-05	-4.75315	2.71068	-0.639563	MIR4680///PDCD4	microRNA 4680///programmed cell death 4 (neoplastic transformation inhibitor)	100616113///27250			NM_014456
213680_at	7.12e-05	1.17e-05	-4.75255	2.70857	-2.78122	KRT6B	keratin 6B	3854
201294_s_at	7.19e-05	1.19e-05	-4.7495	2.69779	-0.797517	WSB1	WD repeat and SOCS box containing 1	26118			N24643
202706_s_at	7.21e-05	1.19e-05	-4.74893	2.69578	-0.468818	UMPS	uridine monophosphate synthetase	7372			D86227
204780_s_at	7.22e-05	1.19e-05	-4.74815	2.693	-1.17694	FAS	Fas cell surface death receptor	355
208384_s_at	7.32e-05	1.21e-05	-4.74451	2.68014	-0.524949	MID2	midline 2	11043			NM_012216
212865_s_at	7.32e-05	1.21e-05	-4.74426	2.67927	-1.63524	COL14A1	collagen type XIV alpha 1 chain	7373			BF449063
219327_s_at	7.32e-05	1.21e-05	-4.74425	2.67924	-1.38904	GPRC5C	G protein-coupled receptor class C group 5 member C	55890			NM_022036
212163_at	7.33e-05	1.21e-05	-4.74353	2.6767	-0.491247	KIDINS220	kinase D-interacting substrate 220kDa	57498			AB033076
216474_x_at	7.34e-05	1.21e-05	-4.74321	2.67558	-1.97426	TPSB2///TPSAB1	tryptase beta 2 (gene/pseudogene)///tryptase alpha/beta 1	64499///7177			AF206667
204311_at	7.46e-05	1.23e-05	-4.73843	2.6587	-0.944646	ATP1B2	ATPase Na+/K+ transporting subunit beta 2	482			NM_001678
212302_at	7.5e-05	1.24e-05	-4.73701	2.65369	-0.585845	RTF1	RTF1 homolog, Paf1/RNA polymerase II complex component	23168
209939_x_at	7.52e-05	1.24e-05	-4.73627	2.65109	-0.714335	CFLAR	CASP8 and FADD like apoptosis regulator	8837			AF005775
203088_at	7.54e-05	1.25e-05	-4.73513	2.64705	-2.02497	FBLN5	fibulin 5	10516			NM_006329
215283_at	7.62e-05	1.26e-05	-4.73191	2.63568	-0.63049	LINC00667	long intergenic non-protein coding RNA 667	339290			U79248
207375_s_at	7.64e-05	1.27e-05	-4.731	2.63249	-1.16614	IL15RA	interleukin 15 receptor subunit alpha	3601			NM_002189
204462_s_at	7.66e-05	1.27e-05	-4.73013	2.62942	-1.21935	SLC16A2	solute carrier family 16 member 2	6567			NM_006517
213388_at	7.66e-05	1.27e-05	-4.72994	2.62875	-1.51657	LOC101930416///LOC101929792///LOC100996724///PDE4DIP	myomegalin-like///uncharacterized LOC101929792///phosphodiesterase 4D interacting protein-like///phosphodiesterase 4D interacting protein	101930416///101929792///100996724///9659
214753_at	7.74e-05	1.29e-05	-4.72722	2.61918	-1.68354	N4BP2L2	NEDD4 binding protein 2 like 2	10443
213548_s_at	7.74e-05	1.29e-05	-4.7271	2.61872	-2.19949	CDV3	CDV3 homolog	55573			BG257762
214507_s_at	7.79e-05	1.3e-05	-4.7252	2.61203	-1.31819	EXOSC2	exosome component 2	23404			NM_014285
215824_at	7.8e-05	1.3e-05	-4.72447	2.60946	-1.344						AK026469
206355_at	7.88e-05	1.31e-05	-4.72148	2.59894	-1.27896	GNAL	G protein subunit alpha L	2774			R20102
220067_at	7.9e-05	1.32e-05	-4.72077	2.59643	-0.848421	SPTBN5	spectrin beta, non-erythrocytic 5	51332			NM_016642
205073_at	7.97e-05	1.33e-05	-4.71793	2.58644	-1.05765	CYP2J2	cytochrome P450 family 2 subfamily J member 2	1573			NM_000775
213666_at	8.01e-05	1.34e-05	-4.71661	2.5818	-0.895699	SEPT6	septin 6	23157			AK026589
206271_at	8.1e-05	1.35e-05	-4.71348	2.57077	-1.25247	TLR3	toll like receptor 3	7098			NM_003265
204793_at	8.11e-05	1.36e-05	-4.71267	2.56793	-1.01315	GPRASP1	G protein-coupled receptor associated sorting protein 1	9737			NM_014710
213164_at	8.13e-05	1.36e-05	-4.7121	2.56591	-0.979599	SLC5A3	solute carrier family 5 member 3	6526			AI867198
206607_at	8.23e-05	1.38e-05	-4.70806	2.55168	-0.921624	CBL	Cbl proto-oncogene	867			NM_005188
209339_at	8.27e-05	1.39e-05	-4.70644	2.54598	-1.68167	SIAH2	siah E3 ubiquitin protein ligase 2	6478			U76248
209276_s_at	8.32e-05	1.4e-05	-4.7046	2.53953	-1.49065	GLRX	glutaredoxin	2745			AF162769
207065_at	8.47e-05	1.42e-05	-4.6996	2.52196	-1.45042	KRT75	keratin 75	9119			NM_004693
218666_s_at	8.62e-05	1.45e-05	-4.69453	2.50412	-0.514877	STX17	syntaxin 17	55014			NM_017919
200912_s_at	8.62e-05	1.45e-05	-4.69425	2.50315	-0.586166	MIR1248///SNORA81///SNORA4///SNORD2///SNORA63///EIF4A2	microRNA 1248///small nucleolar RNA, H/ACA box 81///small nucleolar RNA, H/ACA box 4///small nucleolar RNA, C/D box 2///small nucleolar RNA, H/ACA box 63///eukaryotic translation initiation factor 4A2	100302143///677847///619568///619567///6043///1974			NM_001967
200986_at	8.64e-05	1.45e-05	-4.69352	2.50059	-1.19194	SERPING1	serpin family G member 1	710			NM_000062
1431_at	8.7e-05	1.47e-05	-4.69138	2.49308	-0.74693	CYP2E1	cytochrome P450 family 2 subfamily E member 1	1571	NA	NA	J02843
215355_at	8.75e-05	1.47e-05	-4.68983	2.48762	-1.7901	POU2F3	POU class 2 homeobox 3	25833
221139_s_at	8.76e-05	1.48e-05	-4.68932	2.48584	-0.871803	CSAD	cysteine sulfinic acid decarboxylase	51380			NM_015989
219416_at	8.76e-05	1.48e-05	-4.68917	2.4853	-1.0172	SCARA3	scavenger receptor class A member 3	51435			NM_016240
202787_s_at	8.78e-05	1.48e-05	-4.68831	2.48228	-0.54298	MAPKAPK3	mitogen-activated protein kinase-activated protein kinase 3	7867			U43784
212436_at	8.84e-05	1.49e-05	-4.68639	2.47554	-0.992047	TRIM33	tripartite motif containing 33	51592			AI967961
212135_s_at	8.88e-05	1.5e-05	-4.68527	2.47163	-0.828664	ATP2B4	ATPase plasma membrane Ca2+ transporting 4	493			AW517686
210542_s_at	8.96e-05	1.51e-05	-4.68247	2.46178	-0.684595	SLCO3A1	solute carrier organic anion transporter family member 3A1	28232			BC000585
201179_s_at	9.01e-05	1.52e-05	-4.68079	2.45589	-0.532387	GNAI3	G protein subunit alpha i3	2773			J03005
214097_at	9.08e-05	1.54e-05	-4.67824	2.44695	-0.813426	RPS21	ribosomal protein S21	6227
218274_s_at	9.08e-05	1.54e-05	-4.67819	2.44678	-1.5203	ANKZF1	ankyrin repeat and zinc finger domain containing 1	55139			NM_018089
201311_s_at	9.08e-05	1.54e-05	-4.67817	2.44671	-0.740753	SH3BGRL	SH3 domain binding glutamate rich protein like	6451			AL515318
219795_at	9.1e-05	1.54e-05	-4.67724	2.44345	-1.20513	SLC6A14	solute carrier family 6 member 14	11254			NM_007231
213030_s_at	9.14e-05	1.55e-05	-4.67606	2.43931	-0.930811	PLXNA2	plexin A2	5362
201196_s_at	9.16e-05	1.56e-05	-4.67492	2.4353	-0.764445	AMD1	adenosylmethionine decarboxylase 1	262			M21154
219220_x_at	9.16e-05	1.56e-05	-4.67487	2.43515	-0.323071	MRPS22	mitochondrial ribosomal protein S22	56945			NM_020191
222205_x_at	9.2e-05	1.56e-05	-4.67368	2.43095	-1.2915	FAM27B///FAM27C///FAM182B	family with sequence similarity 27 member B///family with sequence similarity 27 member C///family with sequence similarity 182 member B	100133121///100132948///728882			AA446466
207017_at	9.27e-05	1.58e-05	-4.67105	2.42173	-1.31781	RAB27B	RAB27B, member RAS oncogene family	5874			NM_004163
220386_s_at	9.27e-05	1.58e-05	-4.67099	2.42155	-0.774695	EML4	echinoderm microtubule associated protein like 4	27436			NM_019063
212092_at	9.3e-05	1.59e-05	-4.66982	2.41744	-2.01539	PEG10	paternally expressed 10	23089			BE858180
220576_at	9.3e-05	1.59e-05	-4.66977	2.41726	-1.11626	PGAP1	post-GPI attachment to proteins 1	80055			NM_024989
204867_at	9.33e-05	1.59e-05	-4.66895	2.41438	-1.06604	GCHFR	GTP cyclohydrolase I feedback regulator	2644			NM_005258
209395_at	9.34e-05	1.59e-05	-4.6683	2.41212	-2.69639	CHI3L1	chitinase 3 like 1	1116			M80927
205610_at	9.48e-05	1.62e-05	-4.6638	2.39635	-1.30441	MYOM1	myomesin 1	8736			NM_003803
210685_s_at	9.57e-05	1.63e-05	-4.66134	2.38775	-0.750358	UBE4B	ubiquitination factor E4B	10277			AB028839
212657_s_at	9.57e-05	1.64e-05	-4.6612	2.38726	-1.39477	IL1RN	interleukin 1 receptor antagonist	3557			U65590
221064_s_at	9.57e-05	1.64e-05	-4.66098	2.38648	-1.32467	UNKL	unkempt family like zinc finger	64718
202729_s_at	9.62e-05	1.64e-05	-4.65964	2.38178	-0.96362	LTBP1	latent transforming growth factor beta binding protein 1	4052			NM_000627
215181_at	9.65e-05	1.65e-05	-4.65849	2.37776	-1.2853	CDH22	cadherin 22	64405			AF035300
212987_at	9.73e-05	1.67e-05	-4.65627	2.37	-0.525219	FBXO9	F-box protein 9	26268
207747_s_at	9.86e-05	1.69e-05	-4.652	2.35507	-1.03963	DOK4	docking protein 4	55715			NM_018110
218411_s_at	9.97e-05	1.71e-05	-4.6487	2.34351	-0.823489	MBIP	MAP3K12 binding inhibitory protein 1	51562			NM_016586
215549_x_at	9.98e-05	1.71e-05	-4.64848	2.34274	-0.864886	CTAGE8///CTAGE4///CTAGE9	CTAGE family member 8///CTAGE family member 4///CTAGE family member 9	100142659///100128553///643854
206722_s_at	0.0001	1.72e-05	-4.64741	2.33899	-1.18551	LPAR2	lysophosphatidic acid receptor 2	9170			NM_004720
[truncated: 2,763 more rows]
