# Supplementary material for: Identification of differentially expressed methylated genes in melanoma versus nevi using bioinformatics methods
Source: PeerJ. 2020 Jun 3;8:e9273. doi: 10.7717/peerj.9273 (PMC7275674; doi:10.7717/peerj.9273)
Supplement: Supplemental Information 4 [file peerj-08-9273-s004.xlsx]

## Sheet: Sheet1
ID	adj.P.Val	P.Value	t	B	logFC	Gene.symbol	Gene.title	Gene.ID	UniGene.title	UniGene.ID	GenBank.Accession
221577_x_at	5e-24	2.24e-28	19.259	53.9447	4.95629	GDF15	growth differentiation factor 15	9518			AF003934
218839_at	6.16e-22	8.29e-26	17.2604	48.2311	4.75588	HEY1	hes related family bHLH transcription factor with YRPW motif 1	23462			NM_012258
213638_at	7.59e-22	1.36e-25	17.0992	47.7495	4.9582	PHACTR1	phosphatase and actin regulator 1	221692
200838_at	7.12e-21	1.92e-24	16.2567	45.1788	2.89443	CTSB	cathepsin B	1508			NM_001908
214841_at	2.11e-20	7.57e-24	15.8297	43.8414	3.20161	CNIH3	cornichon family AMPA receptor auxiliary protein 3	149111			AF070524
202185_at	8e-20	3.23e-23	15.3856	42.4253	2.12761	PLOD3	procollagen-lysine,2-oxoglutarate 5-dioxygenase 3	8985			NM_001084
205681_at	2.64e-19	1.42e-22	14.94	40.9787	3.23915	BCL2A1	BCL2 related protein A1	597			NM_004049
208002_s_at	1.25e-18	9.54e-22	14.378	39.1162	1.67748	ACOT7	acyl-CoA thioesterase 7	11332			NM_007274
201954_at	2.34e-18	1.99e-21	14.1634	38.3939	2.84869	ARPC1B	actin related protein 2/3 complex subunit 1B	10095			NM_005720
203827_at	3.35e-18	3.01e-21	14.0448	37.992	3.04733	WIPI1	WD repeat domain, phosphoinositide interacting 1	55062			NM_017983
203878_s_at	1.1e-17	1.34e-20	13.6177	36.5294	2.75982	MMP11	matrix metallopeptidase 11	4320			NM_005940
200839_s_at	1.29e-17	1.63e-20	13.5617	36.3359	2.28181	CTSB	cathepsin B	1508			NM_001908
213274_s_at	1.39e-17	1.81e-20	13.5316	36.2316	3.29444	CTSB	cathepsin B	1508
222231_s_at	2.11e-17	3.02e-20	13.3866	35.7277	1.2405	LRRC59	leucine rich repeat containing 59	55379
221882_s_at	5.46e-17	8.58e-20	13.0943	34.7037	2.30283	TMEM8A	transmembrane protein 8A	58986
219933_at	9.07e-17	1.55e-19	12.9306	34.1251	1.09827	GLRX2	glutaredoxin 2	51022			NM_016066
200825_s_at	1.11e-16	2e-19	12.8598	33.8736	1.24385	HYOU1	hypoxia up-regulated 1	10525			NM_006389
207144_s_at	1.49e-16	2.74e-19	12.773	33.5648	3.55613	CITED1	Cbp/p300 interacting transactivator with Glu/Asp rich carboxy-terminal domain 1	4435			NM_004143
213587_s_at	1.76e-16	3.41e-19	12.7127	33.3496	3.58514	ATP6V0E2	ATPase H+ transporting V0 subunit e2	155066
209875_s_at	2.21e-16	4.46e-19	12.6386	33.0843	4.34691	SPP1	secreted phosphoprotein 1	6696			M83248
202862_at	2.81e-16	6.23e-19	12.5471	32.7559	2.35691	FAH	fumarylacetoacetate hydrolase	2184			NM_000137
44783_s_at	2.81e-16	6.39e-19	12.5403	32.7315	3.28702	HEY1	hes related family bHLH transcription factor with YRPW motif 1	23462			R61374
222212_s_at	3.27e-16	8.22e-19	12.4714	32.4832	1.64159	CERS2	ceramide synthase 2	29956
204262_s_at	3.36e-16	8.59e-19	12.4593	32.4395	1.92448	PSEN2	presenilin 2	5664			NM_000447
201765_s_at	3.64e-16	9.63e-19	12.4283	32.3276	1.88599	HEXA	hexosaminidase subunit alpha	3073			AL523158
218996_at	3.99e-16	1.09e-18	12.3938	32.2031	1.9464	TFPT	TCF3 fusion partner	29844			NM_013342
203695_s_at	8.83e-16	2.54e-18	12.1656	31.3745	2.39085	DFNA5	DFNA5, deafness associated tumor suppressor	1687			NM_004403
213836_s_at	1.34e-15	4.02e-18	12.0414	30.9209	2.52917	WIPI1	WD repeat domain, phosphoinositide interacting 1	55062			AW052084
212445_s_at	1.92e-15	6.58e-18	11.9095	30.4368	1.43573	NEDD4L	neural precursor cell expressed, developmentally down-regulated 4-like, E3 ubiquitin protein ligase	23327
201739_at	1.99e-15	6.97e-18	11.8941	30.38	1.66834	SGK1	serum/glucocorticoid regulated kinase 1	6446			NM_005627
212338_at	2.9e-15	1.16e-17	11.7585	29.8802	1.66569	MYO1D	myosin ID	4642			AA621962
209123_at	3.06e-15	1.26e-17	11.7358	29.7961	1.67072	QDPR	quinoid dihydropteridine reductase	5860			BC000576
44654_at	3.06e-15	1.27e-17	11.7349	29.7928	1.31259	G6PC3	glucose-6-phosphatase catalytic subunit 3	92579
218522_s_at	3.21e-15	1.36e-17	11.7157	29.7217	1.43568	MAP1S	microtubule associated protein 1S	55201			NM_018174
221059_s_at	3.99e-15	1.79e-17	11.6425	29.4505	2.11109	COTL1	coactosin like F-actin binding protein 1	23406			NM_021615
219143_s_at	4.15e-15	1.9e-17	11.6269	29.3923	2.91257	RPP25	ribonuclease P/MRP subunit p25	54913			NM_017793
203554_x_at	4.74e-15	2.21e-17	11.5865	29.2423	1.66714	PTTG1	pituitary tumor-transforming 1	9232			NM_004219
218888_s_at	4.95e-15	2.33e-17	11.5727	29.1909	2.51625	NETO2	neuropilin and tolloid like 2	81831			NM_018092
208644_at	5.77e-15	2.89e-17	11.5159	28.9794	1.15876	PARP1	poly(ADP-ribose) polymerase 1	142			M32721
206976_s_at	7.22e-15	3.76e-17	11.4465	28.7204	1.87456	HSPH1	heat shock protein family H (Hsp110) member 1	10808			NM_006644
201819_at	8.58e-15	4.51e-17	11.3986	28.5417	1.94173	SCARB1	scavenger receptor class B member 1	949			NM_005505
206592_s_at	8.61e-15	4.56e-17	11.3955	28.53	0.993184	AP3D1	adaptor related protein complex 3 delta 1 subunit	8943			NM_003938
204252_at	1e-14	5.45e-17	11.3487	28.3548	2.11233	CDK2	cyclin dependent kinase 2	1017			M68520
208308_s_at	1.18e-14	6.57e-17	11.2995	28.1702	2.27861	GPI	glucose-6-phosphate isomerase	2821			NM_000175
212744_at	1.34e-14	7.53e-17	11.2639	28.0366	1.45281	BBS4	Bardet-Biedl syndrome 4	585			AI813772
201470_at	1.52e-14	8.98e-17	11.2177	27.8626	1.91374	GSTO1	glutathione S-transferase omega 1	9446			NM_004832
200736_s_at	1.54e-14	9.38e-17	11.2062	27.8194	1.54546	GPX1	glutathione peroxidase 1	2876			NM_000581
201662_s_at	1.77e-14	1.09e-16	11.1659	27.6675	1.95565	ACSL3	acyl-CoA synthetase long-chain family member 3	2181			D89053
214780_s_at	1.87e-14	1.18e-16	11.1452	27.5894	0.877866	MYO9B	myosin IXB	4650
200660_at	2.02e-14	1.29e-16	11.1235	27.5076	1.61463	S100A11	S100 calcium binding protein A11	6282			NM_005620
212739_s_at	2.18e-14	1.41e-16	11.1005	27.4208	1.40193	NME4	NME/NM23 nucleoside diphosphate kinase 4	4833			AL523860
212312_at	2.37e-14	1.56e-16	11.0728	27.3161	1.65623	BCL2L1	BCL2 like 1	598
200972_at	3e-14	2.1e-16	10.9962	27.0263	1.42076	TSPAN3	tetraspanin 3	10099			BC000704
213275_x_at	3.84e-14	2.79e-16	10.9218	26.7442	2.52014	CTSB	cathepsin B	1508
203071_at	4.04e-14	2.97e-16	10.9057	26.6828	3.80956	MIR6872///SEMA3B	microRNA 6872///semaphorin 3B	102465526///7869			NM_004636
218359_at	4.28e-14	3.19e-16	10.8876	26.6143	1.57626	NRSN2	neurensin 2	80023			NM_024958
202613_at	4.39e-14	3.31e-16	10.8778	26.5767	1.21097	CTPS1	CTP synthase 1	1503			NM_001905
204779_s_at	5.09e-14	3.88e-16	10.8363	26.419	2.28838	HOXB7	homeobox B7	3217			NM_004502
212953_x_at	5.19e-14	3.99e-16	10.8296	26.3934	0.866426	CALR	calreticulin	811			BE251303
200827_at	5.25e-14	4.1e-16	10.8223	26.3655	1.39136	PLOD1	procollagen-lysine,2-oxoglutarate 5-dioxygenase 1	5351			NM_000302
221759_at	5.29e-14	4.16e-16	10.8188	26.3524	2.4616	G6PC3	glucose-6-phosphatase catalytic subunit 3	92579			AL583123
212624_s_at	6.55e-14	5.41e-16	10.7505	26.092	2.65302	CHN1	chimerin 1	1123			BF339445
209345_s_at	7.14e-14	6.02e-16	10.723	25.987	1.00305	PI4K2A	phosphatidylinositol 4-kinase type 2 alpha	55361			AL561930
202295_s_at	7.39e-14	6.33e-16	10.7099	25.9368	2.38443	CTSH	cathepsin H	1512			NM_004390
220990_s_at	8.07e-14	7.03e-16	10.6831	25.8344	1.09014	MIR21///VMP1	microRNA 21///vacuole membrane protein 1	406991///81671			NM_030938
204709_s_at	8.07e-14	7.13e-16	10.6794	25.8201	3.84832	KIF23	kinesin family member 23	9493			NM_004856
202779_s_at	8.21e-14	7.3e-16	10.6734	25.7974	3.41729	UBE2S	ubiquitin conjugating enzyme E2 S	27338			NM_014501
209198_s_at	9.37e-14	8.53e-16	10.6331	25.643	1.60276	SYT11	synaptotagmin 11	23208			BC004291
202260_s_at	1.04e-13	9.64e-16	10.6016	25.5223	2.43629	STXBP1	syntaxin binding protein 1	6812			NM_003165
201251_at	1.08e-13	1.01e-15	10.5892	25.4748	2.71669	PKM	pyruvate kinase, muscle	5315			NM_002654
215836_s_at	1.29e-13	1.27e-15	10.5311	25.2519	1.62328	PCDHGA1///PCDHGA2///PCDHGA3///PCDHGA4///PCDHGA5///PCDHGA6///PCDHGA7///PCDHGA9///PCDHGA10///PCDHGA11///PCDHGB1///PCDHGB2///PCDHGB3///PCDHGB5///PCDHGB6///PCDHGB7///PCDHGC4///PCDHGC5///PCDHGA12///PCDHGA8///PCDHGB4///PCDHGC3	protocadherin gamma subfamily A, 1///protocadherin gamma subfamily A, 2///protocadherin gamma subfamily A, 3///protocadherin gamma subfamily A, 4///protocadherin gamma subfamily A, 5///protocadherin gamma subfamily A, 6///protocadherin gamma subfamily A, 7///protocadherin gamma subfamily A, 9///protocadherin gamma subfamily A, 10///protocadherin gamma subfamily A, 11///protocadherin gamma subfami…	56114///56113///56112///56111///56110///56109///56108///56107///56106///56105///56104///56103///56102///56101///56100///56099///56098///56097///26025///9708///8641///5098
202961_s_at	1.29e-13	1.27e-15	10.5308	25.2508	1.78928	ARMC2-AS1///ATP5J2	ARMC2 antisense RNA 1///ATP synthase, H+ transporting, mitochondrial Fo complex subunit F2	101929716///9551			NM_004889
203011_at	1.3e-13	1.29e-15	10.527	25.2362	1.15795	IMPA1	inositol monophosphatase 1	3612			NM_005536
204092_s_at	1.46e-13	1.49e-15	10.4898	25.0934	1.34319	AURKA	aurora kinase A	6790			NM_003600
204436_at	1.72e-13	1.8e-15	10.4414	24.907	1.36492	PLEKHO2	pleckstrin homology domain containing O2	80301			NM_025201
212862_at	1.75e-13	1.85e-15	10.435	24.8823	0.915136	CDS2	CDP-diacylglycerol synthase 2	8760			AL568982
218786_at	1.83e-13	1.93e-15	10.4231	24.8364	1.51351	NT5DC3	5'-nucleotidase domain containing 3	51559
220091_at	1.84e-13	1.96e-15	10.4199	24.8242	3.22087	SLC2A6	solute carrier family 2 member 6	11182			NM_017585
218678_at	1.85e-13	1.97e-15	10.4178	24.8159	3.57832	NES	nestin	10763
203663_s_at	2.02e-13	2.19e-15	10.3912	24.7136	1.91014	COX5A	cytochrome c oxidase subunit 5A	9377			NM_004255
209247_s_at	2.35e-13	2.64e-15	10.3437	24.5302	0.979423	ABCF2	ATP binding cassette subfamily F member 2	10061			BC001661
205566_at	2.54e-13	2.88e-15	10.3209	24.4421	2.25291	ABHD2	abhydrolase domain containing 2	11057			NM_007011
218189_s_at	2.59e-13	2.95e-15	10.3151	24.4197	1.25923	NANS	N-acetylneuraminate synthase	54187			NM_018946
200832_s_at	2.8e-13	3.2e-15	10.294	24.3382	2.05488	SCD	stearoyl-CoA desaturase	6319			AB032261
202370_s_at	3.39e-13	3.96e-15	10.2399	24.129	1.29029	CBFB	core-binding factor beta subunit	865			NM_001755
202329_at	3.92e-13	4.67e-15	10.1982	23.9674	1.68895	CSK	c-src tyrosine kinase	1445			NM_004383
215155_at	3.94e-13	4.7e-15	10.1962	23.9596	2.43466	HEXA	hexosaminidase subunit alpha	3073			J04178
218151_x_at	4.1e-13	4.97e-15	10.182	23.9049	1.01786	SLC52A2	solute carrier family 52 member 2	79581			NM_024531
201342_at	4.1e-13	4.98e-15	10.1815	23.9027	0.860436	SNRPC	small nuclear ribonucleoprotein polypeptide C	6631			NM_003093
203234_at	4.14e-13	5.06e-15	10.1778	23.8883	1.93644	UPP1	uridine phosphorylase 1	7378			NM_003364
208540_x_at	4.19e-13	5.15e-15	10.173	23.8698	1.23903
202603_at	4.75e-13	5.92e-15	10.1375	23.7322	1.43957	ADAM10	ADAM metallopeptidase domain 10	102			N51370
221485_at	4.76e-13	5.96e-15	10.1361	23.7267	1.60417	B4GALT5	beta-1,4-galactosyltransferase 5	9334
204995_at	4.88e-13	6.14e-15	10.1285	23.6973	2.16777	CDK5R1	cyclin dependent kinase 5 regulatory subunit 1	8851			AL567411
209186_at	5.13e-13	6.49e-15	10.1141	23.6413	0.912525	ATP2A2	ATPase sarcoplasmic/endoplasmic reticulum Ca2+ transporting 2	488			M23114
211373_s_at	5.34e-13	6.8e-15	10.1023	23.5956	1.95115	PSEN2	presenilin 2	5664			U34349
207060_at	6.1e-13	7.96e-15	10.0624	23.4405	2.08507	EN2	engrailed homeobox 2	2020			NM_001427
216973_s_at	6.21e-13	8.13e-15	10.057	23.4195	2.46151	HOXB7	homeobox B7	3217			S49765
214023_x_at	6.34e-13	8.46e-15	10.0471	23.3809	2.73998	TUBB2B	tubulin beta 2B class IIb	347733			AL533838
205717_x_at	6.35e-13	8.49e-15	10.0462	23.3773	1.421	PCDHGA1///PCDHGA2///PCDHGA3///PCDHGA4///PCDHGA5///PCDHGA6///PCDHGA7///PCDHGA9///PCDHGA10///PCDHGA11///PCDHGB1///PCDHGB2///PCDHGB3///PCDHGB5///PCDHGB6///PCDHGB7///PCDHGC4///PCDHGC5///PCDHGA12///PCDHGA8///PCDHGB4///PCDHGC3	protocadherin gamma subfamily A, 1///protocadherin gamma subfamily A, 2///protocadherin gamma subfamily A, 3///protocadherin gamma subfamily A, 4///protocadherin gamma subfamily A, 5///protocadherin gamma subfamily A, 6///protocadherin gamma subfamily A, 7///protocadherin gamma subfamily A, 9///protocadherin gamma subfamily A, 10///protocadherin gamma subfamily A, 11///protocadherin gamma subfami…	56114///56113///56112///56111///56110///56109///56108///56107///56106///56105///56104///56103///56102///56101///56100///56099///56098///56097///26025///9708///8641///5098			NM_002588
214211_at	6.57e-13	8.85e-15	10.0355	23.3359	1.23415	FTH1	ferritin heavy chain 1	2495
218447_at	6.66e-13	9.06e-15	10.0296	23.3127	1.24821	CMC2	C-X9-C motif containing 2	56942			NM_020188
202141_s_at	8.18e-13	1.15e-14	9.96938	23.0783	0.914212	COPS8	COP9 signalosome subunit 8	10920			BC003090
212552_at	8.9e-13	1.26e-14	9.94567	22.9858	1.15973	HPCAL1	hippocalcin like 1	3241			BE617588
205904_at	9.04e-13	1.29e-14	9.94048	22.9656	1.55024	MICA	MHC class I polypeptide-related sequence A	100507436			NM_000247
210242_x_at	9.18e-13	1.32e-14	9.93463	22.9428	1.4278	ST20	suppressor of tumorigenicity 20	400410			AF249277
202188_at	9.41e-13	1.36e-14	9.92668	22.9118	1.50671	NUP93	nucleoporin 93	9688			NM_014669
202737_s_at	9.46e-13	1.38e-14	9.92396	22.9012	1.4424	LSM4	LSM4 homolog, U6 small nuclear RNA and mRNA degradation associated	25804			NM_012321
55093_at	9.48e-13	1.38e-14	9.92251	22.8955	1.75813	CHPF2	chondroitin polymerizing factor 2	54480			AA534198
201189_s_at	9.51e-13	1.4e-14	9.92034	22.8871	1.48575	ITPR3	inositol 1,4,5-trisphosphate receptor type 3	3710			NM_002224
203775_at	9.99e-13	1.48e-14	9.90537	22.8286	1.75271	SLC25A13	solute carrier family 25 member 13	10165			NM_014251
205690_s_at	1.07e-12	1.62e-14	9.88226	22.7384	2.528	BUD31	BUD31 homolog	8896			NM_003910
219636_s_at	1.1e-12	1.68e-14	9.87346	22.7041	2.10255	ARMC9	armadillo repeat containing 9	80210			NM_025139
203731_s_at	1.16e-12	1.8e-14	9.85571	22.6347	1.49132	ZKSCAN5	zinc finger with KRAB and SCAN domains 5	23660			NM_014569
213338_at	1.28e-12	2.03e-14	9.82564	22.5172	2.78546	TMEM158	transmembrane protein 158 (gene/pseudogene)	25907			BF062629
204202_at	1.3e-12	2.08e-14	9.81986	22.4946	1.60933	IQCE	IQ motif containing E	23288			NM_152558
208749_x_at	1.36e-12	2.19e-14	9.80673	22.4432	1.23038	FLOT1	flotillin 1	10211			AF085357
206441_s_at	1.55e-12	2.52e-14	9.77152	22.3054	2.63557	COMMD4	COMM domain containing 4	54939			NM_017828
200822_x_at	1.55e-12	2.52e-14	9.77076	22.3024	1.05434	TPI1	triosephosphate isomerase 1	7167			NM_000365
202671_s_at	1.75e-12	2.86e-14	9.73882	22.1774	1.34421	PDXK	pyridoxal (pyridoxine, vitamin B6) kinase	8566			NM_003681
200625_s_at	1.75e-12	2.87e-14	9.73822	22.175	0.677939	CAP1	adenylate cyclase associated protein 1	10487			NM_006367
210740_s_at	1.87e-12	3.1e-14	9.71867	22.0984	0.967172	ITPK1	inositol-tetrakisphosphate 1-kinase	3705			AF279372
210052_s_at	2.17e-12	3.66e-14	9.67697	21.9349	1.51714	TPX2	TPX2, microtubule nucleation factor	22974			AF098158
209079_x_at	2.32e-12	3.94e-14	9.65868	21.8631	1.48074	PCDHGA1///PCDHGA2///PCDHGA3///PCDHGA4///PCDHGA5///PCDHGA6///PCDHGA7///PCDHGA9///PCDHGA10///PCDHGA11///PCDHGB1///PCDHGB2///PCDHGB3///PCDHGB5///PCDHGB6///PCDHGB7///PCDHGC4///PCDHGC5///PCDHGA12///PCDHGA8///PCDHGB4///PCDHGC3	protocadherin gamma subfamily A, 1///protocadherin gamma subfamily A, 2///protocadherin gamma subfamily A, 3///protocadherin gamma subfamily A, 4///protocadherin gamma subfamily A, 5///protocadherin gamma subfamily A, 6///protocadherin gamma subfamily A, 7///protocadherin gamma subfamily A, 9///protocadherin gamma subfamily A, 10///protocadherin gamma subfamily A, 11///protocadherin gamma subfami…	56114///56113///56112///56111///56110///56109///56108///56107///56106///56105///56104///56103///56102///56101///56100///56099///56098///56097///26025///9708///8641///5098			AF152318
213011_s_at	2.4e-12	4.08e-14	9.64992	21.8287	0.940394	TPI1	triosephosphate isomerase 1	7167
202399_s_at	2.45e-12	4.18e-14	9.64369	21.8043	1.3833	C15orf38-AP3S2///AP3S2	C15orf38-AP3S2 readthrough///adaptor related protein complex 3 sigma 2 subunit	100526783///10239			NM_005829
211066_x_at	2.52e-12	4.35e-14	9.63398	21.7661	1.27758	PCDHGA1///PCDHGA2///PCDHGA3///PCDHGA4///PCDHGA5///PCDHGA6///PCDHGA7///PCDHGA9///PCDHGA10///PCDHGA11///PCDHGB1///PCDHGB2///PCDHGB3///PCDHGB5///PCDHGB6///PCDHGB7///PCDHGC4///PCDHGC5///PCDHGA12///PCDHGA8///PCDHGB4///PCDHGC3	protocadherin gamma subfamily A, 1///protocadherin gamma subfamily A, 2///protocadherin gamma subfamily A, 3///protocadherin gamma subfamily A, 4///protocadherin gamma subfamily A, 5///protocadherin gamma subfamily A, 6///protocadherin gamma subfamily A, 7///protocadherin gamma subfamily A, 9///protocadherin gamma subfamily A, 10///protocadherin gamma subfamily A, 11///protocadherin gamma subfami…	56114///56113///56112///56111///56110///56109///56108///56107///56106///56105///56104///56103///56102///56101///56100///56099///56098///56097///26025///9708///8641///5098			BC006439
209015_s_at	2.58e-12	4.47e-14	9.62695	21.7385	1.73083	DNAJB6	DnaJ heat shock protein family (Hsp40) member B6	10049			BC002446
204585_s_at	2.6e-12	4.52e-14	9.6242	21.7277	3.32222	L1CAM	L1 cell adhesion molecule	3897			NM_000425
212472_at	2.77e-12	4.87e-14	9.60545	21.6541	1.96045	MICAL2	microtubule associated monooxygenase, calponin and LIM domain containing 2	9645			BE965029
202382_s_at	2.82e-12	4.95e-14	9.60106	21.6368	0.856023	GNPDA1	glucosamine-6-phosphate deaminase 1	10007			NM_005471
208079_s_at	2.84e-12	5.01e-14	9.59833	21.6261	2.3329	AURKA	aurora kinase A	6790			NM_003600
209827_s_at	2.84e-12	5.02e-14	9.59788	21.6243	2.37713	IL16	interleukin 16	3603			NM_004513
201400_at	2.98e-12	5.31e-14	9.5834	21.5674	0.901066	PSMB3	proteasome subunit beta 3	5691			NM_002795
210073_at	2.99e-12	5.34e-14	9.58237	21.5634	2.18837	ST8SIA1	ST8 alpha-N-acetyl-neuraminide alpha-2,8-sialyltransferase 1	6489			L32867
213262_at	3.26e-12	5.84e-14	9.55958	21.4738	1.2941	SACS	sacsin molecular chaperone	26278			AI932370
202239_at	3.27e-12	5.88e-14	9.55794	21.4673	0.824677	PARP4	poly(ADP-ribose) polymerase family member 4	143			NM_006437
201792_at	3.29e-12	5.94e-14	9.55532	21.457	1.70987	AEBP1	AE binding protein 1	165			NM_001129
201004_at	3.45e-12	6.29e-14	9.54102	21.4008	1.19933	SSR4	signal sequence receptor subunit 4	6748			NM_006280
221853_s_at	3.47e-12	6.37e-14	9.53788	21.3884	0.853685	LOC101060373///NOMO3///NOMO2///NOMO1	uncharacterized LOC101060373///NODAL modulator 3///NODAL modulator 2///NODAL modulator 1	101060373///408050///283820///23420
203022_at	3.53e-12	6.51e-14	9.53269	21.368	1.00656	RNASEH2A	ribonuclease H2 subunit A	10535			NM_006397
218175_at	3.69e-12	6.85e-14	9.51988	21.3176	1.48726	CCDC92	coiled-coil domain containing 92	80212			NM_025140
201536_at	3.92e-12	7.3e-14	9.50384	21.2544	1.18107	DUSP3	dual specificity phosphatase 3	1845			AL048503
211981_at	3.99e-12	7.45e-14	9.49856	21.2336	3.18028	COL4A1	collagen type IV alpha 1 chain	1282			NM_001845
201804_x_at	4.09e-12	7.67e-14	9.49153	21.206	1.24386	TBCB	tubulin folding cofactor B	1155			NM_001281
201938_at	4.17e-12	7.88e-14	9.48479	21.1794	1.13881	CDK2AP1	cyclin dependent kinase 2 associated protein 1	8099			NM_004642
217946_s_at	4.35e-12	8.26e-14	9.47273	21.1319	0.962614	SAE1	SUMO1 activating enzyme subunit 1	10055			NM_005500
220454_s_at	4.53e-12	8.62e-14	9.46205	21.0898	1.1988	SEMA6A	semaphorin 6A	57556			NM_020796
205447_s_at	4.73e-12	9.09e-14	9.4489	21.038	2.81129	MAP3K12	mitogen-activated protein kinase kinase kinase 12	7786
217736_s_at	4.73e-12	9.09e-14	9.44887	21.0379	0.920031	EIF2AK1	eukaryotic translation initiation factor 2 alpha kinase 1	27102			NM_014413
214893_x_at	4.86e-12	9.43e-14	9.43978	21.0021	2.68937	HCN2	hyperpolarization activated cyclic nucleotide gated potassium channel 2	610
211762_s_at	5.37e-12	1.05e-13	9.41283	20.8958	1.12677	KPNA2	karyopherin subunit alpha 2	3838			BC005978
203502_at	5.49e-12	1.08e-13	9.40607	20.8691	1.4658	BPGM	bisphosphoglycerate mutase	669			NM_001724
203094_at	5.5e-12	1.09e-13	9.40445	20.8627	1.0138	MAD2L1BP	MAD2L1 binding protein	9587			NM_014628
203730_s_at	5.5e-12	1.09e-13	9.40418	20.8617	1.41848	ZKSCAN5	zinc finger with KRAB and SCAN domains 5	23660
221710_x_at	5.54e-12	1.1e-13	9.40143	20.8508	1.1256	EVA1B	eva-1 homolog B	55194			BC006241
219041_s_at	5.86e-12	1.17e-13	9.38587	20.7894	1.82176	REPIN1	replication initiator 1	29803			NM_014374
201704_at	5.9e-12	1.18e-13	9.38355	20.7803	1.20894	ENTPD6	ectonucleoside triphosphate diphosphohydrolase 6 (putative)	955			NM_001247
205142_x_at	5.98e-12	1.2e-13	9.3793	20.7635	1.13874	ABCD1	ATP binding cassette subfamily D member 1	215			NM_000033
202070_s_at	5.99e-12	1.2e-13	9.37849	20.7603	1.66524	IDH3A	isocitrate dehydrogenase 3 (NAD(+)) alpha	3419			NM_005530
201202_at	6.07e-12	1.22e-13	9.37444	20.7443	1.18806	PCNA	proliferating cell nuclear antigen	5111			NM_002592
204015_s_at	6.13e-12	1.24e-13	9.37178	20.7338	2.85209	DUSP4	dual specificity phosphatase 4	1846			BC002671
204170_s_at	6.15e-12	1.24e-13	9.37026	20.7278	1.88321	CKS2	CDC28 protein kinase regulatory subunit 2	1164			NM_001827
201500_s_at	6.16e-12	1.25e-13	9.36902	20.7229	0.775551	PPP1R11	protein phosphatase 1 regulatory inhibitor subunit 11	6992			NM_021959
210142_x_at	6.16e-12	1.25e-13	9.36834	20.7203	1.36764	FLOT1	flotillin 1	10211			AF117234
202499_s_at	6.25e-12	1.28e-13	9.36412	20.7036	2.4026	SLC2A3	solute carrier family 2 member 3	6515			NM_006931
220178_at	6.3e-12	1.29e-13	9.36148	20.6931	2.94416	MFSD12	major facilitator superfamily domain containing 12	126321
206332_s_at	6.68e-12	1.37e-13	9.34629	20.6332	1.26219	IFI16	interferon gamma inducible protein 16	3428			NM_005531
213491_x_at	7.33e-12	1.52e-13	9.3199	20.5289	0.792575	RPN2	ribophorin II	6185			AL514285
201642_at	7.39e-12	1.54e-13	9.31667	20.5162	0.833478	IFNGR2	interferon gamma receptor 2 (interferon gamma transducer 1)	3460			NM_005534
211980_at	7.44e-12	1.56e-13	9.31407	20.5059	2.0356	COL4A1	collagen type IV alpha 1 chain	1282			AI922605
212174_at	7.57e-12	1.59e-13	9.30924	20.4868	0.950323	AK2	adenylate kinase 2	204			W02312
218161_s_at	7.78e-12	1.64e-13	9.30081	20.4535	2.46881	CLN6	ceroid-lipofuscinosis, neuronal 6, late infantile, variant	54982			NM_017882
219555_s_at	7.78e-12	1.64e-13	9.30081	20.4535	2.86031	CENPN	centromere protein N	55839			NM_018455
201393_s_at	7.85e-12	1.66e-13	9.29772	20.4413	1.38859	IGF2R	insulin like growth factor 2 receptor	3482			NM_000876
200871_s_at	7.94e-12	1.69e-13	9.29406	20.4268	0.962785	PSAP	prosaposin	5660			NM_002778
216194_s_at	7.95e-12	1.69e-13	9.29313	20.4231	1.35121	TBCB	tubulin folding cofactor B	1155
219634_at	8.65e-12	1.85e-13	9.27062	20.3341	2.03835	CHST11	carbohydrate (chondroitin 4) sulfotransferase 11	50515			NM_018413
216092_s_at	8.72e-12	1.87e-13	9.26794	20.3235	1.04914	SLC7A8	solute carrier family 7 member 8	23428			AL365347
219578_s_at	9.22e-12	1.99e-13	9.25353	20.2665	3.0463	CPEB1	cytoplasmic polyadenylation element binding protein 1	64506			NM_030594
211964_at	9.67e-12	2.1e-13	9.24008	20.2133	2.04169	COL4A2	collagen type IV alpha 2 chain	1284			X05610
213435_at	1e-11	2.17e-13	9.23126	20.1784	2.72324	SATB2	SATB homeobox 2	23314			AB028957
209773_s_at	1.02e-11	2.22e-13	9.22593	20.1573	1.5845	RRM2	ribonucleotide reductase regulatory subunit M2	6241			BC001886
209435_s_at	1.04e-11	2.27e-13	9.22078	20.1369	1.11811	ARHGEF2	Rho/Rac guanine nucleotide exchange factor 2	9181			BC000265
205269_at	1.04e-11	2.29e-13	9.21818	20.1267	2.03713	LCP2	lymphocyte cytosolic protein 2	3937
212512_s_at	1.11e-11	2.45e-13	9.20175	20.0616	1.24851	CARM1	coactivator associated arginine methyltransferase 1	10498			AA551784
206245_s_at	1.14e-11	2.52e-13	9.19449	20.0329	1.2931	IVNS1ABP	influenza virus NS1A binding protein	10625			NM_006469
209409_at	1.15e-11	2.57e-13	9.1898	20.0143	1.37452	GRB10	growth factor receptor bound protein 10	2887			D86962
207183_at	1.23e-11	2.76e-13	9.17177	19.9429	2.58403	GPR19	G protein-coupled receptor 19	2842			NM_006143
201252_at	1.29e-11	2.91e-13	9.15825	19.8893	1.1962	PSMC4	proteasome 26S subunit, ATPase 4	5704			NM_006503
218542_at	1.39e-11	3.17e-13	9.13713	19.8056	2.0175	CEP55	centrosomal protein 55	55165			NM_018131
201797_s_at	1.4e-11	3.18e-13	9.13607	19.8014	0.930085	VARS	valyl-tRNA synthetase	7407			NM_006295
204343_at	1.45e-11	3.32e-13	9.12538	19.759	2.38241	ABCA3	ATP binding cassette subfamily A member 3	21			NM_001089
221799_at	1.48e-11	3.4e-13	9.11941	19.7354	2.37105	CHPF2	chondroitin polymerizing factor 2	54480			AB037823
221597_s_at	1.52e-11	3.52e-13	9.11076	19.7011	0.817701	TMEM208	transmembrane protein 208	29100			BC003080
209197_at	1.53e-11	3.54e-13	9.10941	19.6957	1.37858	SYT11	synaptotagmin 11	23208			AA626780
201416_at	1.54e-11	3.59e-13	9.10593	19.6819	1.86835	SOX4	SRY-box 4	6659			BG528420
213399_x_at	1.55e-11	3.62e-13	9.10386	19.6737	0.713034	RPN2	ribophorin II	6185
201313_at	1.58e-11	3.7e-13	9.09839	19.652	2.60445	ENO2	enolase 2	2026			NM_001975
201474_s_at	1.75e-11	4.11e-13	9.07227	19.5484	2.12215	ITGA3	integrin subunit alpha 3	3675			NM_002204
201105_at	1.8e-11	4.24e-13	9.06456	19.5178	2.03556	LGALS1	galectin 1	3956			NM_002305
221253_s_at	1.81e-11	4.29e-13	9.06185	19.5071	0.931345	BLOC1S5-TXNDC5///TXNDC5	BLOC1S5-TXNDC5 readthrough (NMD candidate)///thioredoxin domain containing 5	100526836///81567			NM_030810
218956_s_at	1.82e-11	4.33e-13	9.05941	19.4973	1.68839	ATP5J2-PTCD1///PTCD1	ATP5J2-PTCD1 readthrough///pentatricopeptide repeat domain 1	100526740///26024			NM_015545
208637_x_at	1.85e-11	4.4e-13	9.05543	19.4816	1.77624	ACTN1	actinin alpha 1	87			BC003576
208820_at	1.87e-11	4.49e-13	9.05057	19.4623	0.826745	PTK2	protein tyrosine kinase 2	5747			AL037339
202733_at	1.9e-11	4.57e-13	9.04635	19.4455	1.07717	LOC101927705///P4HA2	uncharacterized LOC101927705///prolyl 4-hydroxylase subunit alpha 2	101927705///8974			NM_004199
217871_s_at	1.91e-11	4.62e-13	9.04329	19.4334	1.82333	MIF	macrophage migration inhibitory factor (glycosylation-inhibiting factor)	4282			NM_002415
212119_at	1.96e-11	4.76e-13	9.03591	19.4041	1.33132	RHOQ	ras homolog family member Q	23433			BF670447
213960_at	2.03e-11	4.93e-13	9.027	19.3687	5.46386	NTRK3	neurotrophic receptor tyrosine kinase 3	4916			T87225
202954_at	2.04e-11	4.96e-13	9.02556	19.363	1.14681	UBE2C	ubiquitin conjugating enzyme E2 C	11065			NM_007019
205458_at	2.05e-11	5.01e-13	9.02317	19.3535	2.16474	MC1R	melanocortin 1 receptor	4157			BG034972
203454_s_at	2.05e-11	5.01e-13	9.023	19.3528	0.804821	ATOX1	antioxidant 1 copper chaperone	475			NM_004045
208658_at	2.05e-11	5.02e-13	9.02286	19.3523	1.15175	PDIA4	protein disulfide isomerase family A member 4	9601			BC000425
36994_at	2.08e-11	5.12e-13	9.01801	19.333	1.01838	ATP6V0C	ATPase H+ transporting V0 subunit c	527			M62762
203458_at	2.13e-11	5.24e-13	9.01188	19.3087	0.968937	SPR	sepiapterin reductase (7,8-dihydrobiopterin:NADP+ oxidoreductase)	6697
203262_s_at	2.21e-11	5.48e-13	9.00095	19.2652	1.09691	FAM50A	family with sequence similarity 50 member A	9130			NM_004699
203315_at	2.36e-11	5.89e-13	8.98314	19.1945	1.00222	NCK2	NCK adaptor protein 2	8440			BC000103
221539_at	2.42e-11	6.05e-13	8.97644	19.1679	1.43845	EIF4EBP1	eukaryotic translation initiation factor 4E binding protein 1	1978			AB044548
204495_s_at	2.47e-11	6.22e-13	8.96947	19.1402	1.06397	C15orf39	chromosome 15 open reading frame 39	56905			NM_015492
209515_s_at	2.47e-11	6.22e-13	8.96937	19.1398	1.9941	RAB27A	RAB27A, member RAS oncogene family	5873			U38654
214752_x_at	2.5e-11	6.32e-13	8.96555	19.1246	1.67288	FLNA	filamin A	2316
213096_at	2.51e-11	6.4e-13	8.96244	19.1122	1.47094	TMCC2	transmembrane and coiled-coil domain family 2	9911			T51252
201577_at	2.7e-11	6.91e-13	8.94328	19.0361	0.981117	NME1	NME/NM23 nucleoside diphosphate kinase 1	4830			NM_000269
221090_s_at	3.07e-11	8e-13	8.90713	18.8923	0.755496	OGFOD1	2-oxoglutarate and iron dependent oxygenase domain containing 1	55239			NM_018233
210550_s_at	3.1e-11	8.11e-13	8.90382	18.8792	3.8345	RASGRF1	Ras protein specific guanine nucleotide releasing factor 1	5923			L26584
200961_at	3.26e-11	8.56e-13	8.89035	18.8255	0.753551	SEPHS2	selenophosphate synthetase 2	22928			NM_012248
221909_at	3.49e-11	9.25e-13	8.87118	18.7493	3.77068	RNFT2	ring finger protein, transmembrane 2	84900			AW299700
214614_at	3.61e-11	9.64e-13	8.86081	18.708	2.82699	MNX1	motor neuron and pancreas homeobox 1	3110
209017_s_at	3.66e-11	9.79e-13	8.85693	18.6926	1.20706	LONP1	lon peptidase 1, mitochondrial	9361			U02389
204033_at	3.7e-11	9.92e-13	8.85377	18.68	2.25318	TRIP13	thyroid hormone receptor interactor 13	9319			NM_004237
205634_x_at	3.83e-11	1.03e-12	8.84352	18.6392	0.813158	ZDHHC24	zinc finger DHHC-type containing 24	254359			NM_024298
220980_s_at	4e-11	1.08e-12	8.83239	18.5949	1.28326	ADPGK	ADP dependent glucokinase	83440			NM_031284
203905_at	4e-11	1.08e-12	8.83229	18.5945	0.808859	PARN	poly(A)-specific ribonuclease	5073			NM_002582
40273_at	4.05e-11	1.1e-12	8.82832	18.5787	1.20008	SPHK2	sphingosine kinase 2	56848			AA485440
203167_at	4.07e-11	1.1e-12	8.82706	18.5737	1.72365	TIMP2	TIMP metallopeptidase inhibitor 2	7077			NM_003255
32836_at	4.14e-11	1.13e-12	8.822	18.5535	0.993571	AGPAT1	1-acylglycerol-3-phosphate O-acyltransferase 1	10554			U56417
222267_at	4.18e-11	1.14e-12	8.81832	18.5389	2.17183	TMEM209	transmembrane protein 209	84928			BE619220
218608_at	4.24e-11	1.17e-12	8.81327	18.5188	1.44093	ATP13A2	ATPase 13A2	23400			NM_022089
219152_at	4.34e-11	1.2e-12	8.80722	18.4946	3.40799	PODXL2	podocalyxin like 2	50512			NM_015720
201660_at	4.5e-11	1.25e-12	8.79665	18.4525	2.36685	ACSL3	acyl-CoA synthetase long-chain family member 3	2181			AL525798
204594_s_at	4.53e-11	1.26e-12	8.79502	18.446	0.641315	MIEF1	mitochondrial elongation factor 1	54471
204247_s_at	4.6e-11	1.28e-12	8.7907	18.4288	1.92337	CDK5	cyclin dependent kinase 5	1020			NM_004935
218330_s_at	4.72e-11	1.32e-12	8.78378	18.4013	2.44627	NAV2	neuron navigator 2	89797			NM_182964
212117_at	4.75e-11	1.33e-12	8.78123	18.3911	0.787062	RHOQ	ras homolog family member Q	23433			BF978689
218143_s_at	5.03e-11	1.41e-12	8.76589	18.33	1.40946	SCAMP2	secretory carrier membrane protein 2	10066			NM_005697
208974_x_at	5.13e-11	1.44e-12	8.76065	18.3091	1.12819	KPNB1	karyopherin subunit beta 1	3837			BC003572
219637_at	5.18e-11	1.46e-12	8.75728	18.2957	1.75475	ARMC9	armadillo repeat containing 9	80210			NM_025139
201661_s_at	5.21e-11	1.47e-12	8.75565	18.2892	2.25443	ACSL3	acyl-CoA synthetase long-chain family member 3	2181			NM_004457
213112_s_at	5.54e-11	1.58e-12	8.73879	18.222	2.4055	SQSTM1	sequestosome 1	8878			N30649
215091_s_at	5.77e-11	1.65e-12	8.72725	18.176	0.974031	GTF3A	general transcription factor IIIA	2971			BE542815
212793_at	6.01e-11	1.73e-12	8.71622	18.132	1.92627	DAAM2	dishevelled associated activator of morphogenesis 2	23500			BF513244
208696_at	6.11e-11	1.76e-12	8.71155	18.1134	1.49737	CCT5	chaperonin containing TCP1 subunit 5	22948			AF275798
206864_s_at	6.16e-11	1.78e-12	8.70943	18.1049	2.51682	HRK	harakiri, BCL2 interacting protein	8739			NM_003806
200967_at	6.18e-11	1.79e-12	8.70814	18.0998	1.49031	PPIB	peptidylprolyl isomerase B	5479			NM_000942
209132_s_at	6.26e-11	1.81e-12	8.7046	18.0857	2.13432	COMMD4	COMM domain containing 4	54939			BE313890
201953_at	6.26e-11	1.82e-12	8.70286	18.0787	1.04886	CIB1	calcium and integrin binding 1	10519			NM_006384
208683_at	6.35e-11	1.85e-12	8.69884	18.0627	0.889772	CAPN2	calpain 2	824			M23254
217297_s_at	6.36e-11	1.86e-12	8.69784	18.0587	2.1777	MYO9B	myosin IXB	4650			AF143684
221558_s_at	6.38e-11	1.87e-12	8.69689	18.0549	1.6371	LEF1	lymphoid enhancer binding factor 1	51176			AF288571
202433_at	6.62e-11	1.96e-12	8.68567	18.0102	0.66345	SLC35B1	solute carrier family 35 member B1	10237			NM_005827
213360_s_at	6.66e-11	1.97e-12	8.68382	18.0028	1.15032	POM121C///POM121	POM121 transmembrane nucleoporin C///POM121 transmembrane nucleoporin	100101267///9883			AA514622
208677_s_at	7.02e-11	2.09e-12	8.66979	17.9468	1.82345	BSG	basigin (Ok blood group)	682			AL550657
221629_x_at	7.86e-11	2.35e-12	8.64023	17.8288	0.747851	HGH1	HGH1 homolog	51236			AF151022
202128_at	8.3e-11	2.5e-12	8.62517	17.7687	0.727282	AREL1	apoptosis resistant E3 ubiquitin protein ligase 1	9870
200078_s_at	8.37e-11	2.53e-12	8.62247	17.758	1.12647	ATP6V0B	ATPase H+ transporting V0 subunit b	533	NA	NA	BC005876
215535_s_at	8.46e-11	2.56e-12	8.61925	17.7451	1.28863	AGPAT1	1-acylglycerol-3-phosphate O-acyltransferase 1	10554			AF007145
203028_s_at	9.23e-11	2.8e-12	8.59659	17.6547	2.14522	CYBA	cytochrome b-245 alpha chain	1535			NM_000101
206617_s_at	9.47e-11	2.89e-12	8.58954	17.6265	2.49537	RENBP	renin binding protein	5973			NM_002910
200910_at	9.47e-11	2.89e-12	8.58952	17.6264	1.0867	LOC101927137///CCT3	uncharacterized LOC101927137///chaperonin containing TCP1 subunit 3	101927137///7203			NM_005998
219478_at	9.58e-11	2.93e-12	8.58584	17.6118	5.05391	WFDC1	WAP four-disulfide core domain 1	58189			NM_021197
210845_s_at	1e-10	3.08e-12	8.57375	17.5635	1.85452	PLAUR	plasminogen activator, urokinase receptor	5329			U08839
208966_x_at	1.02e-10	3.15e-12	8.56794	17.5403	1.05157	IFI16	interferon gamma inducible protein 16	3428			AF208043
218317_x_at	1.05e-10	3.23e-12	8.56169	17.5153	1.06395	SLX1A///SLX1B	SLX1 homolog A, structure-specific endonuclease subunit///SLX1 homolog B, structure-specific endonuclease subunit	548593///79008			NM_024044
213002_at	1.07e-10	3.3e-12	8.55644	17.4944	1.12335	MARCKS	myristoylated alanine rich protein kinase C substrate	4082
218493_at	1.07e-10	3.31e-12	8.55555	17.4908	1.00336	SNRNP25	small nuclear ribonucleoprotein U11/U12 subunit 25	79622			NM_024571
200661_at	1.1e-10	3.41e-12	8.54861	17.4631	0.945676	CTSA	cathepsin A	5476			NM_000308
207828_s_at	1.1e-10	3.42e-12	8.54759	17.459	1.5028	CENPF	centromere protein F	1063			NM_016343
218030_at	1.1e-10	3.42e-12	8.54748	17.4586	1.10148	GIT1	GIT ArfGAP 1	28964			NM_014030
221484_at	1.12e-10	3.52e-12	8.54062	17.4311	1.43275	B4GALT5	beta-1,4-galactosyltransferase 5	9334			BF691447
201195_s_at	1.12e-10	3.52e-12	8.54032	17.4299	2.15054	SLC7A5	solute carrier family 7 member 5	8140			AB018009
206307_s_at	1.14e-10	3.59e-12	8.53586	17.4121	2.95443	FOXD1	forkhead box D1	2297			NM_004472
202580_x_at	1.2e-10	3.79e-12	8.52243	17.3585	1.88329	FOXM1	forkhead box M1	2305			NM_021953
206377_at	1.2e-10	3.82e-12	8.52025	17.3498	1.39355	FOXF2	forkhead box F2	2295			NM_001452
218474_s_at	1.24e-10	3.94e-12	8.5129	17.3204	1.02248	KCTD5	potassium channel tetramerization domain containing 5	54442			NM_018992
200644_at	1.24e-10	3.94e-12	8.5126	17.3192	1.39661	MARCKSL1	MARCKS like 1	65108			NM_023009
204099_at	1.26e-10	4.03e-12	8.50684	17.2962	2.4142	SMARCD3	SWI/SNF related, matrix associated, actin dependent regulator of chromatin, subfamily d, member 3	6604			NM_003078
202958_at	1.27e-10	4.08e-12	8.50388	17.2843	1.47635	PTPN9	protein tyrosine phosphatase, non-receptor type 9	5780			NM_002833
201850_at	1.37e-10	4.43e-12	8.48365	17.2035	2.86041	CAPG	capping actin protein, gelsolin like	822			NM_001747
213230_at	1.41e-10	4.57e-12	8.47596	17.1728	2.18283	CDR2L	cerebellar degeneration related protein 2 like	30850			AI422335
200085_s_at	1.42e-10	4.63e-12	8.47293	17.1607	0.990781	TCEB2	transcription elongation factor B subunit 2	6923			NM_007108
206128_at	1.43e-10	4.66e-12	8.47149	17.1549	1.6862	ADRA2C	adrenoceptor alpha 2C	152
200629_at	1.43e-10	4.67e-12	8.47071	17.1518	1.84619	WARS	tryptophanyl-tRNA synthetase	7453			NM_004184
218564_at	1.46e-10	4.79e-12	8.46438	17.1265	0.977133	RFWD3	ring finger and WD repeat domain 3	55159			BC002574
200065_s_at	1.53e-10	5.01e-12	8.45313	17.0815	0.935313	MIR3620///ARF1	microRNA 3620///ADP ribosylation factor 1	100500810///375	NA	NA	AF052179
40560_at	1.56e-10	5.13e-12	8.4477	17.0598	1.76847	TBX2	T-box 2	6909			U28049
56829_at	1.56e-10	5.14e-12	8.44689	17.0565	0.786513	TRAPPC9	trafficking protein particle complex 9	83696			H61826
201126_s_at	1.58e-10	5.2e-12	8.44405	17.0452	0.984063	MGAT1	mannosyl (alpha-1,3-)-glycoprotein beta-1,2-N-acetylglucosaminyltransferase	4245			NM_002406
201417_at	1.6e-10	5.3e-12	8.43955	17.0272	1.41049	SOX4	SRY-box 4	6659
214321_at	1.71e-10	5.67e-12	8.42268	16.9597	1.66937	NOV	nephroblastoma overexpressed	4856			BF440025
202752_x_at	1.71e-10	5.68e-12	8.42252	16.9591	1.3516	SLC7A8	solute carrier family 7 member 8	23428			NM_012244
222206_s_at	1.74e-10	5.81e-12	8.41681	16.9363	2.06855	NCLN	nicalin	56926			AA781143
221530_s_at	1.77e-10	5.9e-12	8.4132	16.9219	1.66715	BHLHE41	basic helix-loop-helix family member e41	79365
200859_x_at	1.78e-10	5.94e-12	8.4113	16.9142	1.70714	FLNA	filamin A	2316			NM_001456
211759_x_at	1.78e-10	5.98e-12	8.40989	16.9086	1.18823	TBCB	tubulin folding cofactor B	1155			BC005969
202224_at	1.79e-10	6.01e-12	8.40862	16.9035	1.42748	CRK	CRK proto-oncogene, adaptor protein	1398			BF304695
220975_s_at	1.83e-10	6.18e-12	8.40175	16.876	1.5283	C1QTNF1	C1q and tumor necrosis factor related protein 1	114897			NM_030968
209848_s_at	1.83e-10	6.18e-12	8.40167	16.8757	2.73474	PMEL	premelanosome protein	6490			U01874
221031_s_at	1.85e-10	6.25e-12	8.39895	16.8648	1.98586	APOLD1	apolipoprotein L domain containing 1	81575			NM_030817
218563_at	1.86e-10	6.31e-12	8.39634	16.8544	1.09394	NDUFA3	NADH:ubiquinone oxidoreductase subunit A3	4696			NM_004542
218663_at	1.87e-10	6.35e-12	8.39474	16.848	2.45391	NCAPG	non-SMC condensin I complex subunit G	64151			NM_022346
204148_s_at	1.92e-10	6.56e-12	8.38673	16.816	1.45418	POMZP3///ZP3	POM121 and ZP3 fusion///zona pellucida glycoprotein 3 (sperm receptor)	22932///7784			NM_012230
212038_s_at	1.93e-10	6.62e-12	8.38458	16.8074	0.849261	VDAC1	voltage dependent anion channel 1	7416			AL515918
201338_x_at	2e-10	6.88e-12	8.37521	16.7699	0.842597	GTF3A	general transcription factor IIIA	2971			NM_002097
212892_at	2.09e-10	7.24e-12	8.3627	16.7198	0.956576	ZNF282	zinc finger protein 282	8427			AW130128
213113_s_at	2.14e-10	7.41e-12	8.3567	16.6958	0.930697	SLC43A3	solute carrier family 43 member 3	29015			AI630178
218755_at	2.15e-10	7.47e-12	8.35488	16.6886	1.97694	KIF20A	kinesin family member 20A	10112			NM_005733
37652_at	2.3e-10	8.03e-12	8.33717	16.6177	0.925559	CABIN1	calcineurin binding protein 1	23523			AB002328
209229_s_at	2.42e-10	8.47e-12	8.32402	16.5651	1.00574	PPP6R1	protein phosphatase 6 regulatory subunit 1	22870			BC002799
209172_s_at	2.43e-10	8.54e-12	8.32177	16.5561	1.5076	CENPF	centromere protein F	1063			U30872
203693_s_at	2.45e-10	8.64e-12	8.31889	16.5446	1.29413	E2F3	E2F transcription factor 3	1871			NM_001949
219361_s_at	2.52e-10	8.89e-12	8.3119	16.5166	1.74935	AEN	apoptosis enhancing nuclease	64782			NM_022767
209665_at	2.54e-10	8.98e-12	8.30955	16.5072	0.714604	CYB561D2	cytochrome b561 family member D2	11068			AF040704
214581_x_at	2.54e-10	9.01e-12	8.30868	16.5037	2.26657	TNFRSF21	TNF receptor superfamily member 21	27242			BE568134
202111_at	2.56e-10	9.06e-12	8.30733	16.4983	2.11799	SLC4A2	solute carrier family 4 member 2	6522			NM_003040
222155_s_at	2.62e-10	9.33e-12	8.30006	16.4692	2.17853	SLC52A2	solute carrier family 52 member 2	79581			AK021918
217226_s_at	2.75e-10	9.83e-12	8.28716	16.4175	1.24783	SFXN3	sideroflexin 3	81855			M95929
204819_at	2.76e-10	9.87e-12	8.28612	16.4134	0.968772	FGD1	FYVE, RhoGEF and PH domain containing 1	2245			NM_004463
204955_at	2.77e-10	9.92e-12	8.28485	16.4083	1.248	SRPX	sushi repeat containing protein, X-linked	8406			NM_006307
213330_s_at	2.84e-10	1.02e-11	8.2778	16.3801	1.13359	STIP1	stress induced phosphoprotein 1	10963			BE886580
212715_s_at	2.84e-10	1.02e-11	8.27732	16.3782	1.94797	MICAL3	microtubule associated monooxygenase, calponin and LIM domain containing 3	57553			AB020626
217624_at	2.84e-10	1.03e-11	8.2768	16.3761	3.48007	PDAP1	PDGFA associated protein 1	11333
215115_x_at	2.85e-10	1.03e-11	8.27527	16.37	4.00454	NTRK3	neurotrophic receptor tyrosine kinase 3	4916
202153_s_at	2.87e-10	1.04e-11	8.27316	16.3615	1.21215	NUP62	nucleoporin 62	23636			NM_016553
200709_at	2.9e-10	1.05e-11	8.27025	16.3499	0.634673	LOC101929368///FKBP1A	uncharacterized LOC101929368///FK506 binding protein 1A	101929368///2280			NM_000801
212178_s_at	2.91e-10	1.05e-11	8.26985	16.3483	1.59515	POM121C	POM121 transmembrane nucleoporin C	100101267
212402_at	2.91e-10	1.06e-11	8.2694	16.3465	1.30662	ZC3H13	zinc finger CCCH-type containing 13	23091			BE895685
220155_s_at	2.95e-10	1.08e-11	8.26511	16.3293	1.9934	BRD9	bromodomain containing 9	65980			NM_023924
219537_x_at	2.96e-10	1.08e-11	8.26379	16.324	1.90339	DLL3	delta like canonical Notch ligand 3	10683			NM_016941
218530_at	3.12e-10	1.15e-11	8.24952	16.2669	1.10577	FHOD1	formin homology 2 domain containing 1	29109			NM_013241
205436_s_at	3.19e-10	1.17e-11	8.24356	16.243	1.14219	H2AFX	H2A histone family member X	3014			NM_002105
204357_s_at	3.19e-10	1.18e-11	8.243	16.2408	2.47745	LIMK1	LIM domain kinase 1	3984			NM_002314
212791_at	3.25e-10	1.2e-11	8.23869	16.2235	0.898396	C1orf216	chromosome 1 open reading frame 216	127703			AL042729
201398_s_at	3.25e-10	1.2e-11	8.23785	16.2202	0.581046	TRAM1	translocation associated membrane protein 1	23471			BC000687
219557_s_at	3.27e-10	1.21e-11	8.23628	16.2139	0.870863	NRIP3	nuclear receptor interacting protein 3	56675			NM_020645
200055_at	3.31e-10	1.23e-11	8.23278	16.1999	0.667825	TAF10	TATA-box binding protein associated factor 10	6881	NA	NA	NM_006284
215025_at	3.39e-10	1.26e-11	8.22666	16.1754	5.83054	NTRK3	neurotrophic receptor tyrosine kinase 3	4916			S76476
204281_at	3.43e-10	1.28e-11	8.22308	16.161	1.49897	TEAD4	TEA domain transcription factor 4	7004			NM_003213
209255_at	3.46e-10	1.29e-11	8.21963	16.1472	2.25207	KLHDC10	kelch domain containing 10	23008			D87454
202594_at	3.48e-10	1.3e-11	8.21802	16.1408	0.825687	LEPROTL1	leptin receptor overlapping transcript-like 1	23484			NM_015344
203456_at	3.51e-10	1.31e-11	8.21614	16.1332	1.60456	PRAF2	PRA1 domain family member 2	11230			NM_007213
205738_s_at	3.67e-10	1.38e-11	8.20328	16.0817	1.65257	FABP3	fatty acid binding protein 3	2170			NM_004102
219051_x_at	3.69e-10	1.39e-11	8.20126	16.0736	1.56002	METRN	meteorin, glial cell differentiation regulator	79006			NM_024042
218376_s_at	3.69e-10	1.4e-11	8.20081	16.0718	1.80379	MICAL1	microtubule associated monooxygenase, calponin and LIM domain containing 1	64780			NM_022765
218115_at	3.69e-10	1.4e-11	8.20073	16.0715	1.18312	ASF1B	anti-silencing function 1B histone chaperone	55723			NM_018154
219219_at	3.75e-10	1.42e-11	8.19614	16.0531	1.22244	TMEM160	transmembrane protein 160	54958			NM_017854
202705_at	3.78e-10	1.44e-11	8.19388	16.0441	1.6858	CCNB2	cyclin B2	9133			NM_004701
218856_at	3.78e-10	1.44e-11	8.19331	16.0418	2.63318	TNFRSF21	TNF receptor superfamily member 21	27242			NM_014452
203518_at	3.87e-10	1.48e-11	8.18661	16.015	1.58469	LYST	lysosomal trafficking regulator	1130			NM_000081
214315_x_at	3.93e-10	1.51e-11	8.1816	15.9949	1.35809	CALR	calreticulin	811
221538_s_at	4.02e-10	1.55e-11	8.17572	15.9714	1.51955	PLXNA1	plexin A1	5361			AL136663
201672_s_at	4.11e-10	1.58e-11	8.16986	15.9479	0.59201	USP14	ubiquitin specific peptidase 14	9097			NM_005151
221436_s_at	4.12e-10	1.59e-11	8.16868	15.9432	1.70978	CDCA3	cell division cycle associated 3	83461			NM_031299
220949_s_at	4.28e-10	1.66e-11	8.15822	15.9013	0.915804	C7orf49	chromosome 7 open reading frame 49	78996			NM_024033
205813_s_at	4.3e-10	1.67e-11	8.15682	15.8956	2.91113	MAT1A	methionine adenosyltransferase 1A	4143			NM_000429
222175_s_at	4.46e-10	1.74e-11	8.14667	15.855	1.53458	MED15	mediator complex subunit 15	51586			AK000003
208445_s_at	4.46e-10	1.74e-11	8.14605	15.8526	0.885057	BAZ1B	bromodomain adjacent to zinc finger domain 1B	9031
215087_at	4.47e-10	1.75e-11	8.14548	15.8503	1.33913	C15orf39	chromosome 15 open reading frame 39	56905			AL109730
221641_s_at	4.6e-10	1.8e-11	8.13819	15.821	1.22518	ACOT9	acyl-CoA thioesterase 9	23597			AF241787
208744_x_at	4.64e-10	1.82e-11	8.13509	15.8086	2.57384	HSPH1	heat shock protein family H (Hsp110) member 1	10808			BG403660
214687_x_at	4.66e-10	1.83e-11	8.13385	15.8037	1.16362	ALDOA	aldolase, fructose-bisphosphate A	226
200919_at	4.69e-10	1.85e-11	8.13188	15.7958	0.938102	PHC2	polyhomeotic homolog 2	1912			NM_004427
218074_at	4.69e-10	1.85e-11	8.13128	15.7934	1.12681	FAM96B	family with sequence similarity 96 member B	51647			NM_016062
200966_x_at	4.76e-10	1.88e-11	8.1273	15.7774	1.19671	ALDOA	aldolase, fructose-bisphosphate A	226			NM_000034
218460_at	4.78e-10	1.89e-11	8.1261	15.7726	0.573386	DNAAF5	dynein axonemal assembly factor 5	54919			NM_017802
201088_at	4.79e-10	1.9e-11	8.12526	15.7692	1.44141	KPNA2	karyopherin subunit alpha 2	3838			NM_002266
204017_at	4.86e-10	1.93e-11	8.12127	15.7533	1.0464	KDELR3	KDEL endoplasmic reticulum protein retention receptor 3	11015			NM_006855
219066_at	4.95e-10	1.97e-11	8.11611	15.7326	1.69937	PPCDC	phosphopantothenoylcysteine decarboxylase	60490			NM_021823
204076_at	5.24e-10	2.1e-11	8.10029	15.6692	1.22755	ENTPD4	ectonucleoside triphosphate diphosphohydrolase 4	9583			AB002390
204197_s_at	5.24e-10	2.1e-11	8.10019	15.6688	1.61078	RUNX3	runt related transcription factor 3	864			NM_004350
200950_at	5.28e-10	2.12e-11	8.09765	15.6587	1.48744	ARPC1A	actin related protein 2/3 complex subunit 1A	10552			NM_006409
201714_at	5.29e-10	2.13e-11	8.0968	15.6553	0.976776	TUBG1	tubulin gamma 1	7283			NM_001070
212448_at	5.55e-10	2.25e-11	8.08382	15.6033	2.32045	NEDD4L	neural precursor cell expressed, developmentally down-regulated 4-like, E3 ubiquitin protein ligase	23327			AB007899
208824_x_at	5.62e-10	2.28e-11	8.07995	15.5877	0.936076	CDK16	cyclin dependent kinase 16	5127			BC001048
201669_s_at	5.76e-10	2.34e-11	8.07325	15.5609	0.995474	MARCKS	myristoylated alanine rich protein kinase C substrate	4082			NM_002356
217025_s_at	6.13e-10	2.51e-11	8.05685	15.4952	1.15538	DBN1	drebrin 1	1627			AL110225
211160_x_at	6.42e-10	2.64e-11	8.04442	15.4454	2.48775	ACTN1	actinin alpha 1	87			M95178
201710_at	6.42e-10	2.64e-11	8.04415	15.4443	2.03503	MYBL2	MYB proto-oncogene like 2	4605			NM_002466
202478_at	6.5e-10	2.67e-11	8.04084	15.4311	1.89798	TRIB2	tribbles pseudokinase 2	28951			NM_021643
206462_s_at	6.56e-10	2.7e-11	8.03822	15.4205	4.64276	NTRK3	neurotrophic receptor tyrosine kinase 3	4916			NM_002530
221918_at	6.69e-10	2.76e-11	8.0332	15.4004	1.14593	CDK17	cyclin dependent kinase 17	5128			AI742210
204584_at	6.7e-10	2.77e-11	8.03255	15.3978	3.53156	L1CAM	L1 cell adhesion molecule	3897
201204_s_at	6.71e-10	2.77e-11	8.03181	15.3948	0.960079	RRBP1	ribosome binding protein 1	6238			AA706065
207440_at	6.73e-10	2.78e-11	8.03098	15.3915	0.960416	SLC35A2	solute carrier family 35 member A2	7355			NM_005660
200006_at	6.74e-10	2.79e-11	8.03028	15.3887	0.612176	PARK7	Parkinsonism associated deglycase	11315	NA	NA	NM_007262
204458_at	6.76e-10	2.8e-11	8.0293	15.3848	1.29091	PLA2G15	phospholipase A2 group XV	23659			AL110209
217784_at	6.94e-10	2.89e-11	8.02146	15.3534	1.10264	YKT6	YKT6 v-SNARE homolog (S. cerevisiae)	10652			BE384482
208759_at	7.28e-10	3.04e-11	8.00908	15.3038	0.813502	NCSTN	nicastrin	23385			AF240468
222240_s_at	7.29e-10	3.06e-11	8.00796	15.2993	1.34542	ISYNA1	inositol-3-phosphate synthase 1	51477			AL137749
203300_x_at	7.45e-10	3.13e-11	8.00209	15.2758	1.86942	AP1S2	adaptor related protein complex 1 sigma 2 subunit	8905			NM_003916
221815_at	7.57e-10	3.19e-11	7.9976	15.2578	3.98857	ABHD2	abhydrolase domain containing 2	11057
221613_s_at	7.58e-10	3.2e-11	7.99696	15.2552	1.24371	ZFAND6	zinc finger AN1-type containing 6	54469			AL136598
46323_at	7.67e-10	3.24e-11	7.99365	15.2419	0.808854	CANT1	calcium activated nucleotidase 1	124583			AL120741
214853_s_at	8.08e-10	3.42e-11	7.98005	15.1875	0.822544	SHC1	SHC adaptor protein 1	6464			AI091079
213795_s_at	8.09e-10	3.43e-11	7.97952	15.1853	0.923214	PTPRA	protein tyrosine phosphatase, receptor type A	5786
200677_at	8.1e-10	3.44e-11	7.97863	15.1818	0.864526	PTTG1IP	pituitary tumor-transforming 1 interacting protein	754			NM_004339
217885_at	8.19e-10	3.49e-11	7.9752	15.168	0.825197	IPO9	importin 9	55705			NM_018085
212247_at	8.24e-10	3.52e-11	7.97313	15.1597	1.46568	NUP205	nucleoporin 205	23165
218152_at	8.47e-10	3.63e-11	7.96575	15.1301	1.14104	HMG20A	high mobility group 20A	10363			NM_018200
212473_s_at	8.63e-10	3.72e-11	7.95969	15.1059	1.94896	MICAL2	microtubule associated monooxygenase, calponin and LIM domain containing 2	9645			BE965029
212110_at	8.63e-10	3.72e-11	7.95956	15.1053	1.10164	SLC39A14	solute carrier family 39 member 14	23516			D31887
212120_at	8.88e-10	3.84e-11	7.95171	15.0739	0.835498	RHOQ	ras homolog family member Q	23433			BE897886
204014_at	9.01e-10	3.9e-11	7.94791	15.0587	3.23138	DUSP4	dual specificity phosphatase 4	1846			NM_001394
213008_at	9.15e-10	3.97e-11	7.94349	15.0409	2.31114	FANCI	Fanconi anemia complementation group I	55215			BG403615
202642_s_at	9.16e-10	3.99e-11	7.94251	15.037	1.40858	TRRAP	transformation/transcription domain associated protein	8295			NM_003496
219256_s_at	9.23e-10	4.04e-11	7.93958	15.0253	1.01986	SH3TC1	SH3 domain and tetratricopeptide repeats 1	54436			NM_018986
63825_at	9.59e-10	4.2e-11	7.92992	14.9866	3.23964	ABHD2	abhydrolase domain containing 2	11057			AI557319
200808_s_at	9.61e-10	4.22e-11	7.92893	14.9826	1.1115	ZYX	zyxin	7791			NM_003461
209036_s_at	1.01e-09	4.48e-11	7.9141	14.9232	1.13489	MDH2	malate dehydrogenase 2	4191			BC001917
204778_x_at	1.02e-09	4.51e-11	7.91244	14.9165	2.12456	HOXB7	homeobox B7	3217
201716_at	1.03e-09	4.55e-11	7.91003	14.9068	0.661164	SNX1	sorting nexin 1	6642			NM_003099
205733_at	1.03e-09	4.57e-11	7.90919	14.9035	0.849156	BLM	Bloom syndrome RecQ like helicase	641			NM_000057
218696_at	1.05e-09	4.68e-11	7.9033	14.8799	1.00694	EIF2AK3	eukaryotic translation initiation factor 2 alpha kinase 3	9451			NM_004836
204981_at	1.1e-09	4.9e-11	7.89181	14.8338	1.0162	SLC22A18	solute carrier family 22 member 18	5002			NM_002555
217673_x_at	1.11e-09	4.98e-11	7.88794	14.8183	0.980108	GNAS	GNAS complex locus	2778
215812_s_at	1.11e-09	4.99e-11	7.88746	14.8164	1.55627	SLC6A10PB///SLC6A10P///SLC6A8	solute carrier family 6 member 8 pseudogene///solute carrier family 6 member 10, pseudogene///solute carrier family 6 member 8	653562///386757///6535			U41163
213843_x_at	1.11e-09	4.99e-11	7.8873	14.8157	1.47984	SLC6A8	solute carrier family 6 member 8	6535
217377_x_at	1.12e-09	5.06e-11	7.88423	14.8035	3.80651	NTRK3	neurotrophic receptor tyrosine kinase 3	4916			AF041811
212890_at	1.18e-09	5.32e-11	7.87154	14.7526	0.909467	SLC38A10	solute carrier family 38 member 10	124565			BF663461
211595_s_at	1.19e-09	5.39e-11	7.86832	14.7397	0.990899	MRPS11	mitochondrial ribosomal protein S11	64963			AB049944
218144_s_at	1.23e-09	5.59e-11	7.85961	14.7048	0.785061	INF2	inverted formin, FH2 and WH2 domain containing	64423			NM_022489
204244_s_at	1.24e-09	5.62e-11	7.85806	14.6986	1.77841	DBF4	DBF4 zinc finger	10926			NM_006716
208132_x_at	1.28e-09	5.82e-11	7.84945	14.6641	1.26232	PRRC2A	proline rich coiled-coil 2A	7916			NM_004638
205270_s_at	1.28e-09	5.84e-11	7.84884	14.6616	2.48397	LCP2	lymphocyte cytosolic protein 2	3937			NM_005565
202806_at	1.28e-09	5.85e-11	7.84836	14.6597	1.05876	DBN1	drebrin 1	1627			NM_004395
208723_at	1.35e-09	6.17e-11	7.83538	14.6077	1.38149	USP11	ubiquitin specific peptidase 11	8237			BC000350
208694_at	1.35e-09	6.19e-11	7.83433	14.6035	1.00532	PRKDC	protein kinase, DNA-activated, catalytic polypeptide	5591			U47077
202367_at	1.45e-09	6.65e-11	7.81681	14.5333	1.3434	CUX1	cut like homeobox 1	1523			NM_001913
218291_at	1.45e-09	6.67e-11	7.81611	14.5305	0.789261	LAMTOR2	late endosomal/lysosomal adaptor, MAPK and MTOR activator 2	28956			NM_014017
203069_at	1.47e-09	6.81e-11	7.81108	14.5103	2.98349	SV2A	synaptic vesicle glycoprotein 2A	9900			NM_014849
210999_s_at	1.48e-09	6.84e-11	7.80975	14.505	1.32505	GRB10	growth factor receptor bound protein 10	2887			U66065
212745_s_at	1.5e-09	6.94e-11	7.8064	14.4916	1.4641	BBS4	Bardet-Biedl syndrome 4	585			AI813772
200039_s_at	1.53e-09	7.15e-11	7.79909	14.4623	0.688569	PSMB2	proteasome subunit beta 2	5690	NA	NA	NM_002794
220948_s_at	1.55e-09	7.21e-11	7.79688	14.4534	1.15442	ATP1A1	ATPase Na+/K+ transporting subunit alpha 1	476			NM_000701
221836_s_at	1.56e-09	7.3e-11	7.79389	14.4414	0.782648	TRAPPC9	trafficking protein particle complex 9	83696			AW291218
218824_at	1.56e-09	7.3e-11	7.79376	14.4409	1.55649	PNMAL1	paraneoplastic Ma antigen family like 1	55228			NM_018215
218131_s_at	1.59e-09	7.43e-11	7.7895	14.4239	1.14828	GATAD2A	GATA zinc finger domain containing 2A	54815			NM_017660
205945_at	1.64e-09	7.69e-11	7.7811	14.3902	1.34177	IL6R	interleukin 6 receptor	3570			NM_000565
201876_at	1.66e-09	7.82e-11	7.77702	14.3738	1.00122	PON2	paraoxonase 2	5445			NM_000305
200600_at	1.7e-09	8.04e-11	7.77019	14.3465	1.07657	MSN	moesin	4478			NM_002444
213241_at	1.7e-09	8.07e-11	7.7692	14.3425	2.02307	PLXNC1	plexin C1	10154			AF035307
205122_at	1.73e-09	8.19e-11	7.76559	14.328	1.96894	MSANTD3-TMEFF1///TMEFF1	MSANTD3-TMEFF1 readthrough///transmembrane protein with EGF like and two follistatin like domains 1	100526694///8577			BF439316
212864_at	1.75e-09	8.29e-11	7.76259	14.316	0.767257	CDS2	CDP-diacylglycerol synthase 2	8760			Y16521
201890_at	1.76e-09	8.39e-11	7.75982	14.3049	1.61914	RRM2	ribonucleotide reductase regulatory subunit M2	6241			BE966236
56821_at	1.79e-09	8.55e-11	7.75512	14.2861	0.846369	SLC38A7	solute carrier family 38 member 7	55238			AI963454
208928_at	1.92e-09	9.21e-11	7.73678	14.2126	1.89885	POR	cytochrome p450 oxidoreductase	5447			AF258341
212431_at	1.96e-09	9.41e-11	7.73158	14.1918	0.857427	HMGXB3	HMG-box containing 3	22993			D83778
209365_s_at	1.99e-09	9.56e-11	7.72755	14.1756	1.26796	ECM1	extracellular matrix protein 1	1893			U65932
202557_at	1.99e-09	9.57e-11	7.72731	14.1747	0.928398	HSPA13	heat shock protein family A (Hsp70) member 13	6782			AI718418
219646_at	2.03e-09	9.82e-11	7.72092	14.1491	0.965362	DEF8	differentially expressed in FDCP 8 homolog	54849			NM_017702
220864_s_at	2.04e-09	9.88e-11	7.71949	14.1433	1.15125	NDUFA13	NADH:ubiquinone oxidoreductase subunit A13	51079			NM_015965
218893_at	2.06e-09	9.95e-11	7.71777	14.1364	0.808909	ISOC2	isochorismatase domain containing 2	79763			NM_024710
218011_at	2.08e-09	1.01e-10	7.71381	14.1206	1.13974	UBL5	ubiquitin like 5	59286			NM_024292
214710_s_at	2.09e-09	1.02e-10	7.7125	14.1153	1.09261	CCNB1	cyclin B1	891			BE407516
218662_s_at	2.14e-09	1.04e-10	7.70651	14.0913	1.71527	NCAPG	non-SMC condensin I complex subunit G	64151			NM_022346
209736_at	2.16e-09	1.06e-10	7.70323	14.0782	1.5083	SOX13	SRY-box 13	9580			AF116571
202519_at	2.23e-09	1.09e-10	7.69499	14.0452	0.899763	MLXIP	MLX interacting protein	22877			NM_014938
201761_at	2.34e-09	1.15e-10	7.68309	13.9975	0.904747	MTHFD2	methylenetetrahydrofolate dehydrogenase (NADP+ dependent) 2, methenyltetrahydrofolate cyclohydrolase	10797			NM_006636
203643_at	2.34e-09	1.15e-10	7.68199	13.9931	1.68625	ERF	ETS2 repressor factor	2077			NM_006494
202148_s_at	2.37e-09	1.16e-10	7.67914	13.9817	0.761664	PYCR1	pyrroline-5-carboxylate reductase 1	5831			NM_006907
213215_at	2.42e-09	1.19e-10	7.67315	13.9577	1.5041	C15orf38-AP3S2///AP3S2	C15orf38-AP3S2 readthrough///adaptor related protein complex 3 sigma 2 subunit	100526783///10239			AI910895
210075_at	2.49e-09	1.23e-10	7.6662	13.9298	0.975593	2019-03-02	membrane associated ring-CH-type finger 2	51257			AF151074
217033_x_at	2.56e-09	1.27e-10	7.65846	13.8988	3.58457	NTRK3	neurotrophic receptor tyrosine kinase 3	4916			S76475
204423_at	2.61e-09	1.29e-10	7.65375	13.88	1.74886	MKLN1	muskelin 1	4289			NM_013255
218606_at	2.67e-09	1.32e-10	7.64738	13.8545	0.593773	ZDHHC7	zinc finger DHHC-type containing 7	55625			NM_017740
202475_at	2.67e-09	1.33e-10	7.64723	13.8539	0.987023	TMEM147	transmembrane protein 147	10430			NM_032635
205373_at	2.68e-09	1.33e-10	7.64591	13.8486	3.10283	CTNNA2	catenin alpha 2	1496			NM_004389
200837_at	2.74e-09	1.37e-10	7.6398	13.8241	1.09794	BCAP31	B-cell receptor-associated protein 31	10134			NM_005745
209828_s_at	2.75e-09	1.37e-10	7.6385	13.8189	1.76147	IL16	interleukin 16	3603			M90391
206999_at	2.78e-09	1.39e-10	7.63548	13.8068	2.03874	IL12RB2	interleukin 12 receptor subunit beta 2	3595			NM_001559
208756_at	2.81e-09	1.41e-10	7.63236	13.7943	0.729074	EIF3I	eukaryotic translation initiation factor 3 subunit I	8668			U36764
209397_at	2.85e-09	1.43e-10	7.62859	13.7792	0.91252	ME2	malic enzyme 2	4200			BC000147
222199_s_at	2.86e-09	1.43e-10	7.62775	13.7758	1.1493	BIN3	bridging integrator 3	55909
212081_x_at	2.97e-09	1.5e-10	7.61722	13.7337	1.22705	PRRC2A	proline rich coiled-coil 2A	7916
202043_s_at	3.06e-09	1.54e-10	7.60957	13.703	0.959651	SMS	spermine synthase	6611			NM_004595
201292_at	3.09e-09	1.57e-10	7.60622	13.6896	1.36131	TOP2A	topoisomerase (DNA) II alpha	7153			AL561834
221488_s_at	3.12e-09	1.58e-10	7.60366	13.6794	0.812817	CUTA	cutA divalent cation tolerance homolog	51596			AF230924
202503_s_at	3.14e-09	1.6e-10	7.60134	13.6701	1.51841	KIAA0101	KIAA0101	9768			NM_014736
204401_at	3.18e-09	1.62e-10	7.59771	13.6555	1.88624	KCNN4	potassium calcium-activated channel subfamily N member 4	3783			NM_002250
218435_at	3.25e-09	1.66e-10	7.5922	13.6335	0.920362	DNAJC15	DnaJ heat shock protein family (Hsp40) member C15	29103			NM_013238
208916_at	3.37e-09	1.72e-10	7.58296	13.5965	1.5935	SLC1A5	solute carrier family 1 member 5	6510			AF105230
202189_x_at	3.51e-09	1.8e-10	7.57201	13.5526	0.640914	MIR4745///PTBP1	microRNA 4745///polypyrimidine tract binding protein 1	100616459///5725			NM_002819
218931_at	3.53e-09	1.81e-10	7.57051	13.5466	1.46069	RAB17	RAB17, member RAS oncogene family	64284			NM_022449
217854_s_at	3.55e-09	1.83e-10	7.56848	13.5385	0.883959	POLR2E	RNA polymerase II subunit E	5434			NM_002695
221520_s_at	3.58e-09	1.85e-10	7.56574	13.5275	2.33162	CDCA8	cell division cycle associated 8	55143			BC001651
204998_s_at	3.58e-09	1.85e-10	7.56546	13.5264	0.909065	ATF5	activating transcription factor 5	22809			NM_012068
209238_at	3.69e-09	1.91e-10	7.55763	13.4951	0.620261	STX3	syntaxin 3	6809			BE966922
214201_x_at	3.74e-09	1.94e-10	7.55414	13.4811	1.39369	PRRC2A	proline rich coiled-coil 2A	7916
204720_s_at	3.75e-09	1.94e-10	7.55313	13.4771	2.21337	DNAJC6	DnaJ heat shock protein family (Hsp40) member C6	9829			AV729634
218009_s_at	3.78e-09	1.96e-10	7.55085	13.4679	1.47968	PRC1	protein regulator of cytokinesis 1	9055			NM_003981
201911_s_at	3.82e-09	1.99e-10	7.54789	13.456	1.66215	FARP1	FERM, ARH/RhoGEF and pleckstrin domain protein 1	10160			NM_005766
200618_at	3.84e-09	2e-10	7.54616	13.4491	0.61818	LASP1	LIM and SH3 protein 1	3927			NM_006148
202841_x_at	3.88e-09	2.02e-10	7.54331	13.4377	0.943009	OGFR	opioid growth factor receptor	11054			NM_007346
201864_at	3.94e-09	2.05e-10	7.53949	13.4224	1.02358	GDI1	GDP dissociation inhibitor 1	2664			NM_001493
204654_s_at	3.96e-09	2.07e-10	7.53806	13.4167	2.25745	TFAP2A	transcription factor AP-2 alpha	7020			NM_003220
204198_s_at	3.99e-09	2.09e-10	7.53544	13.4062	1.52427	RUNX3	runt related transcription factor 3	864			AA541630
202261_at	4.09e-09	2.14e-10	7.52918	13.3812	0.700414	VPS72	vacuolar protein sorting 72 homolog	6944			NM_005997
211052_s_at	4.17e-09	2.19e-10	7.52328	13.3575	1.31633	TBCD	tubulin folding cofactor D	6904			BC006364
202887_s_at	4.21e-09	2.22e-10	7.52061	13.3469	1.86612	DDIT4	DNA damage inducible transcript 4	54541			NM_019058
200954_at	4.31e-09	2.28e-10	7.51422	13.3213	1.29825	ATP6V0C	ATPase H+ transporting V0 subunit c	527			NM_001694
221739_at	4.31e-09	2.28e-10	7.51419	13.3211	0.887116	MYDGF	myeloid derived growth factor	56005			AL524093
208837_at	4.36e-09	2.31e-10	7.51106	13.3086	1.08878	TMED3	transmembrane p24 trafficking protein 3	23423			BC000027
217827_s_at	4.4e-09	2.33e-10	7.50847	13.2983	0.982649	SPG21	spastic paraplegia 21 (autosomal recessive, Mast syndrome)	51324			NM_016630
201003_x_at	4.47e-09	2.37e-10	7.50399	13.2804	0.53627	TMEM189-UBE2V1///TMEM189///UBE2V2///UBE2V1	TMEM189-UBE2V1 readthrough///transmembrane protein 189///ubiquitin conjugating enzyme E2 V2///ubiquitin conjugating enzyme E2 V1	387522///387521///7336///7335
213324_at	4.47e-09	2.37e-10	7.50382	13.2796	1.84534	SRC	SRC proto-oncogene, non-receptor tyrosine kinase	6714
213980_s_at	4.48e-09	2.38e-10	7.50311	13.2768	1.02243	CTBP1	C-terminal binding protein 1	1487			AA053830
213336_at	4.5e-09	2.4e-10	7.50168	13.2711	1.3935	BAZ1B	bromodomain adjacent to zinc finger domain 1B	9031			AI826454
200007_at	4.52e-09	2.41e-10	7.50051	13.2664	0.655555	SRP14	signal recognition particle 14	6727	NA	NA	NM_003134
205937_at	4.74e-09	2.54e-10	7.48721	13.2132	2.19675	CGREF1	cell growth regulator with EF-hand domain 1	10669			NM_006569
203217_s_at	4.74e-09	2.54e-10	7.48679	13.2115	1.6116	ST3GAL5	ST3 beta-galactoside alpha-2,3-sialyltransferase 5	8869			NM_003896
209254_at	4.77e-09	2.57e-10	7.48483	13.2037	1.82832	KLHDC10	kelch domain containing 10	23008
213169_at	4.79e-09	2.58e-10	7.48345	13.1982	2.04109	SEMA5A	semaphorin 5A	9037			BG109855
204857_at	4.85e-09	2.61e-10	7.48028	13.1854	2.45854	MAD1L1	MAD1 mitotic arrest deficient like 1	8379			NM_003550
220973_s_at	4.87e-09	2.63e-10	7.47892	13.18	1.87715	SHARPIN	SHANK associated RH domain interactor	81858			NM_030974
32811_at	4.99e-09	2.7e-10	7.47204	13.1525	1.1294	MYO1C	myosin IC	4641			X98507
221482_s_at	5.01e-09	2.72e-10	7.47058	13.1466	1.02972	ARPP19	cAMP regulated phosphoprotein 19	10776			BC003418
209803_s_at	5.21e-09	2.84e-10	7.46019	13.1051	1.33558	PHLDA2	pleckstrin homology like domain family A member 2	7262			AF001294
218961_s_at	5.22e-09	2.85e-10	7.45881	13.0996	0.746	PNKP	polynucleotide kinase 3'-phosphatase	11284			NM_007254
200746_s_at	5.31e-09	2.9e-10	7.45432	13.0816	0.676557	GNB1	G protein subunit beta 1	2782			NM_002074
204432_at	5.32e-09	2.91e-10	7.45376	13.0793	1.05136	SOX12	SRY-box 12	6666			NM_006943
209714_s_at	5.45e-09	2.99e-10	7.44722	13.0532	0.790681	CDKN3	cyclin dependent kinase inhibitor 3	1033			AF213033
201379_s_at	5.46e-09	3e-10	7.44609	13.0487	1.06532	TPD52L2	tumor protein D52 like 2	7165			NM_003288
219372_at	5.63e-09	3.1e-10	7.43814	13.0169	1.23832	IFT81	intraflagellar transport 81	28981			NM_014055
207809_s_at	5.84e-09	3.23e-10	7.42814	12.9769	0.985476	ATP6AP1	ATPase H+ transporting accessory protein 1	537			NM_001183
212635_at	5.86e-09	3.25e-10	7.42685	12.9717	0.880026	TNPO1	transportin 1	3842			AW161626
220974_x_at	6.16e-09	3.43e-10	7.4134	12.9179	1.12332	SFXN3	sideroflexin 3	81855			NM_030971
201106_at	6.25e-09	3.48e-10	7.40949	12.9023	1.28978	GPX4	glutathione peroxidase 4	2879			NM_002085
201403_s_at	6.35e-09	3.55e-10	7.40509	12.8847	0.862569	MGST3	microsomal glutathione S-transferase 3	4259			NM_004528
207438_s_at	6.38e-09	3.57e-10	7.40376	12.8794	1.35362	SNUPN	snurportin 1	10073			NM_005701
201670_s_at	6.65e-09	3.73e-10	7.39261	12.8348	1.41581	MARCKS	myristoylated alanine rich protein kinase C substrate	4082			M68956
217104_at	6.73e-09	3.78e-10	7.38913	12.8209	2.5492	ST20	suppressor of tumorigenicity 20	400410			AL109714
212118_at	6.88e-09	3.89e-10	7.38224	12.7933	0.725968	TRIM27	tripartite motif containing 27	5987			AL523814
207038_at	7.12e-09	4.04e-10	7.37326	12.7574	2.86669	SLC16A6	solute carrier family 16 member 6	9120			NM_004694
200757_s_at	7.16e-09	4.07e-10	7.37151	12.7504	1.02681	CALU	calumenin	813			NM_001219
217419_x_at	7.26e-09	4.14e-10	7.36696	12.7322	1.45539	AGRN	agrin	375790
201231_s_at	7.26e-09	4.14e-10	7.36679	12.7315	1.22277	ENO1	enolase 1	2023			NM_001428
210111_s_at	7.27e-09	4.15e-10	7.36657	12.7307	2.03709	KLHDC10	kelch domain containing 10	23008			AF277175
55692_at	7.38e-09	4.22e-10	7.36237	12.7139	0.750968	ELMO2	engulfment and cell motility 2	63916			W22924
206688_s_at	7.45e-09	4.26e-10	7.35979	12.7035	1.41177	CPSF4	cleavage and polyadenylation specific factor 4	10898			NM_006693
200924_s_at	7.59e-09	4.35e-10	7.35466	12.683	1.04465	SLC3A2	solute carrier family 3 member 2	6520			NM_002394
219071_x_at	7.59e-09	4.36e-10	7.35454	12.6826	0.739045	HGH1	HGH1 homolog	51236			NM_016458
201291_s_at	7.7e-09	4.43e-10	7.35043	12.6662	1.82746	TOP2A	topoisomerase (DNA) II alpha	7153			AU159942
219588_s_at	7.79e-09	4.49e-10	7.34724	12.6534	0.955321	NCAPG2	non-SMC condensin II complex subunit G2	54892			NM_017760
204545_at	7.93e-09	4.57e-10	7.34267	12.6351	2.61816	PEX6	peroxisomal biogenesis factor 6	5190			NM_000287
214632_at	7.93e-09	4.57e-10	7.34245	12.6342	1.15498	NRP2	neuropilin 2	8828			AA295257
208628_s_at	8.08e-09	4.67e-10	7.33733	12.6138	0.736597	YBX1	Y-box binding protein 1	4904			BC002411
203145_at	8.13e-09	4.7e-10	7.3356	12.6069	1.08759	SPAG5	sperm associated antigen 5	10615			NM_006461
201346_at	8.17e-09	4.74e-10	7.33376	12.5995	0.955157	ADIPOR2	adiponectin receptor 2	79602			NM_024551
210854_x_at	8.26e-09	4.81e-10	7.33007	12.5848	1.25633	SLC6A8	solute carrier family 6 member 8	6535			U17986
208949_s_at	8.48e-09	4.95e-10	7.32318	12.5572	0.685309	LGALS3	lectin, galactoside binding soluble 3	3958			BC001120
207614_s_at	8.68e-09	5.08e-10	7.31686	12.532	1.40985	CUL1	cullin 1	8454			NM_003592
217722_s_at	8.73e-09	5.11e-10	7.31533	12.5259	0.969532	NGRN	neugrin, neurite outgrowth associated	51335
207159_x_at	8.9e-09	5.23e-10	7.3096	12.503	0.716895	CRTC1	CREB regulated transcription coactivator 1	23373
222153_at	8.94e-09	5.25e-10	7.30832	12.4979	1.83197	MYEF2	myelin expression factor 2	50804
214717_at	9.1e-09	5.37e-10	7.30314	12.4772	2.0293	PKI55	DKFZp434H1419	150967			AL137534
203876_s_at	9.44e-09	5.58e-10	7.29344	12.4384	1.63181	MMP11	matrix metallopeptidase 11	4320
208691_at	9.54e-09	5.66e-10	7.28996	12.4245	1.52809	TFRC	transferrin receptor	7037			BC001188
214714_at	9.69e-09	5.76e-10	7.28566	12.4073	2.1098	ZNF394	zinc finger protein 394	84124
202154_x_at	9.72e-09	5.79e-10	7.28453	12.4028	1.24433	TUBB3	tubulin beta 3 class III	10381			NM_006086
221732_at	9.75e-09	5.81e-10	7.28342	12.3984	1.64526	CANT1	calcium activated nucleotidase 1	124583			AK026161
203546_at	9.77e-09	5.83e-10	7.28276	12.3958	0.647355	IPO13	importin 13	9670			NM_014652
201281_at	9.81e-09	5.86e-10	7.28151	12.3908	0.684783	ADRM1	adhesion regulating molecule 1	11047			NM_007002
202717_s_at	9.85e-09	5.89e-10	7.28014	12.3853	0.697356	CDC16	cell division cycle 16	8881			NM_003903
213476_x_at	9.98e-09	5.97e-10	7.27665	12.3713	0.961879	TUBB3	tubulin beta 3 class III	10381			AL565749
200721_s_at	1e-08	6.01e-10	7.27532	12.366	0.868572	ACTR1A	ARP1 actin-related protein 1 homolog A, centractin alpha	10121			NM_005736
212561_at	1e-08	6.01e-10	7.27531	12.366	0.710318	DENND5A	DENN domain containing 5A	23258			AA349595
214039_s_at	1e-08	6.04e-10	7.27418	12.3615	0.770339	LAPTM4B	lysosomal protein transmembrane 4 beta	55353			T15777
205687_at	1.01e-08	6.1e-10	7.27154	12.351	0.852364	UBFD1	ubiquitin family domain containing 1	56061			NM_019116
219006_at	1.02e-08	6.12e-10	7.27089	12.3484	0.745824	NDUFAF4	NADH:ubiquinone oxidoreductase complex assembly factor 4	29078			NM_014165
200655_s_at	1.04e-08	6.3e-10	7.26346	12.3187	0.942312	CALM3///CALM2///CALM1	calmodulin 3///calmodulin 2///calmodulin 1	808///805///801			NM_006888
200901_s_at	1.05e-08	6.36e-10	7.26143	12.3106	0.792426	M6PR///PHC1	mannose-6-phosphate receptor, cation dependent///polyhomeotic homolog 1	4074///1911			NM_002355
203764_at	1.06e-08	6.44e-10	7.25832	12.2981	1.59873	DLGAP5	DLG associated protein 5	9787			NM_014750
221483_s_at	1.07e-08	6.5e-10	7.25604	12.2891	1.12528	ARPP19	cAMP regulated phosphoprotein 19	10776			AF084555
209053_s_at	1.07e-08	6.5e-10	7.25588	12.2884	2.33491	WHSC1	Wolf-Hirschhorn syndrome candidate 1	7468			BE793789
217867_x_at	1.1e-08	6.67e-10	7.24956	12.2632	1.61833	BACE2	beta-site APP-cleaving enzyme 2	25825			NM_012105
203718_at	1.1e-08	6.7e-10	7.24859	12.2593	1.05617	PNPLA6	patatin like phospholipase domain containing 6	10908			NM_006702
206696_at	1.1e-08	6.72e-10	7.24786	12.2564	3.24323	GPR143	G protein-coupled receptor 143	4935			NM_000273
202225_at	1.11e-08	6.75e-10	7.24643	12.2507	1.03323	CRK	CRK proto-oncogene, adaptor protein	1398			AW612311
202487_s_at	1.12e-08	6.82e-10	7.24399	12.2409	0.673718	H2AFV	H2A histone family member V	94239			NM_012412
221677_s_at	1.12e-08	6.83e-10	7.24378	12.2401	0.822604	DONSON	downstream neighbor of SON	29980			AF232674
211969_at	1.15e-08	7.07e-10	7.23505	12.2053	0.941595	HSP90AA1	heat shock protein 90 alpha family class A member 1	3320			BG420237
203497_at	1.16e-08	7.1e-10	7.23408	12.2014	0.716027	MED1	mediator complex subunit 1	5469			NM_004774
203213_at	1.2e-08	7.39e-10	7.22422	12.162	1.67922	CDK1	cyclin dependent kinase 1	983			AL524035
221962_s_at	1.22e-08	7.51e-10	7.22016	12.1458	1.18164	UBE2H	ubiquitin conjugating enzyme E2 H	7328
206039_at	1.23e-08	7.6e-10	7.21746	12.1351	1.5901	RAB33A	RAB33A, member RAS oncogene family	9363			NM_004794
218473_s_at	1.28e-08	7.9e-10	7.2079	12.0969	1.00163	COLGALT1	collagen beta(1-O)galactosyltransferase 1	79709			NM_024656
211966_at	1.3e-08	8.05e-10	7.20312	12.0778	1.95138	COL4A2	collagen type IV alpha 2 chain	1284
216088_s_at	1.33e-08	8.21e-10	7.19833	12.0587	0.674187	PSMA7	proteasome subunit alpha 7	5688
201870_at	1.35e-08	8.35e-10	7.19415	12.042	0.524297	TOMM34	translocase of outer mitochondrial membrane 34	10953			NM_006809
218647_s_at	1.42e-08	8.83e-10	7.18044	11.9873	0.626154	YRDC	yrdC N6-threonylcarbamoyltransferase domain containing	79693			NM_024640
200643_at	1.42e-08	8.87e-10	7.17917	11.9823	0.858143	HDLBP	high density lipoprotein binding protein	3069			NM_005336
205366_s_at	1.43e-08	8.91e-10	7.17802	11.9777	1.92224	HOXB6	homeobox B6	3216			NM_018952
206659_at	1.46e-08	9.13e-10	7.17214	11.9542	1.78838
219040_at	1.47e-08	9.19e-10	7.17046	11.9475	1.41845	CORO7	coronin 7	79585			NM_024535
209441_at	1.48e-08	9.23e-10	7.1695	11.9437	1.58051	RHOBTB2	Rho related BTB domain containing 2	23221			AY009093
202564_x_at	1.48e-08	9.24e-10	7.16916	11.9424	0.998509	ARL2	ADP ribosylation factor like GTPase 2	402			NM_001667
202282_at	1.5e-08	9.38e-10	7.16546	11.9276	0.804412	HSD17B10	hydroxysteroid 17-beta dehydrogenase 10	3028			NM_004493
220778_x_at	1.51e-08	9.48e-10	7.16282	11.9171	1.60778	SEMA6B	semaphorin 6B	10501
208511_at	1.52e-08	9.55e-10	7.16104	11.91	1.89819	PTTG3P	pituitary tumor-transforming 3, pseudogene	26255
203955_at	1.54e-08	9.69e-10	7.15754	11.896	1.24524	PPP1R26	protein phosphatase 1 regulatory subunit 26	9858			NM_014811
205334_at	1.54e-08	9.71e-10	7.15684	11.8932	2.05625	S100A1	S100 calcium binding protein A1	6271			NM_006271
210948_s_at	1.61e-08	1.02e-09	7.14569	11.8488	1.1106	LEF1	lymphoid enhancer binding factor 1	51176			AF294627
203782_s_at	1.61e-08	1.02e-09	7.14501	11.846	0.936848	POLRMT	RNA polymerase mitochondrial	5442			NM_005035
218973_at	1.61e-08	1.02e-09	7.14388	11.8415	0.876464	EFL1	elongation factor like GTPase 1	79631			NM_024580
202518_at	1.65e-08	1.05e-09	7.13779	11.8172	0.723061	BCL7B	BCL tumor suppressor 7B	9275			NM_001707
214778_at	1.68e-08	1.07e-09	7.1337	11.801	1.7109	MEGF8	multiple EGF like domains 8	1954			AB011541
203396_at	1.68e-08	1.07e-09	7.13268	11.7969	0.999432	PSMA4	proteasome subunit alpha 4	5685			NM_002789
212666_at	1.69e-08	1.08e-09	7.13141	11.7918	0.820637	SMURF1	SMAD specific E3 ubiquitin protein ligase 1	57154			AB046845
219011_at	1.71e-08	1.09e-09	7.12766	11.7769	1.95322	PLEKHA4	pleckstrin homology domain containing A4	57664			NM_020904
209072_at	1.75e-08	1.12e-09	7.12213	11.7548	2.42039	MBP	myelin basic protein	4155			M13577
217225_x_at	1.75e-08	1.12e-09	7.12204	11.7545	0.665732	LOC101060373///NOMO3///NOMO2///NOMO1	uncharacterized LOC101060373///NODAL modulator 3///NODAL modulator 2///NODAL modulator 1	101060373///408050///283820///23420			AL512687
212320_at	1.76e-08	1.13e-09	7.12003	11.7465	0.797559	TUBB	tubulin beta class I	203068			BC001002
206090_s_at	1.78e-08	1.14e-09	7.11804	11.7386	0.802564	TSNAX-DISC1///DISC1	TSNAX-DISC1 readthrough (NMD candidate)///disrupted in schizophrenia 1	100303453///27185			NM_018662
201920_at	1.78e-08	1.14e-09	7.11747	11.7363	1.28388	SLC20A1	solute carrier family 20 member 1	6574			NM_005415
214068_at	1.78e-08	1.14e-09	7.11737	11.7359	2.4196	BEAN1	brain expressed, associated with NEDD4, 1	146227			AF070610
201587_s_at	1.8e-08	1.16e-09	7.11332	11.7197	0.828571	IRAK1	interleukin 1 receptor associated kinase 1	3654			NM_001569
202497_x_at	1.83e-08	1.18e-09	7.10978	11.7056	2.54979	SLC2A3	solute carrier family 2 member 3	6515
203291_at	2e-08	1.29e-09	7.08644	11.6126	1.10979	CNOT4	CCR4-NOT transcription complex subunit 4	4850			NM_013316
212502_at	2.02e-08	1.31e-09	7.08297	11.5988	0.733328	ADO	2-aminoethanethiol dioxygenase	84890			AV713053
210720_s_at	2.02e-08	1.31e-09	7.08294	11.5987	0.541544	NECAB3	N-terminal EF-hand calcium binding protein 3	63941			AB039947
221688_s_at	2.07e-08	1.34e-09	7.07685	11.5744	1.11418	IMP3	IMP3, U3 small nucleolar ribonucleoprotein	55272			AL136913
212000_at	2.07e-08	1.34e-09	7.07684	11.5744	1.60219	SUGP2	SURP and G-patch domain containing 2	10147			AB002363
208710_s_at	2.09e-08	1.36e-09	7.07413	11.5636	1.42232	AP3D1	adaptor related protein complex 3 delta 1 subunit	8943
219148_at	2.09e-08	1.36e-09	7.07368	11.5618	1.20369	PBK	PDZ binding kinase	55872			NM_018492
202276_at	2.12e-08	1.38e-09	7.07021	11.548	1.30534	SHFM1	split hand/foot malformation (ectrodactyly) type 1	7979			NM_006304
215706_x_at	2.16e-08	1.41e-09	7.06473	11.5261	1.38365	ZYX	zyxin	7791			BC002323
201910_at	2.2e-08	1.44e-09	7.05995	11.5071	1.96314	FARP1	FERM, ARH/RhoGEF and pleckstrin domain protein 1	10160			BF213279
208975_s_at	2.22e-08	1.45e-09	7.05764	11.4979	0.996694	KPNB1	karyopherin subunit beta 1	3837			L38951
203077_s_at	2.22e-08	1.46e-09	7.05705	11.4956	1.01175	SMAD2	SMAD family member 2	4087			NM_005901
200076_s_at	2.24e-08	1.47e-09	7.05476	11.4864	0.650226	KXD1	KxDL motif containing 1	79036	NA	NA	BC006479
221265_s_at	2.24e-08	1.47e-09	7.05399	11.4834	0.795984	VWA9	von Willebrand factor A domain containing 9	81556
207543_s_at	2.25e-08	1.48e-09	7.05349	11.4814	0.907152	P4HA1	prolyl 4-hydroxylase subunit alpha 1	5033			NM_000917
202898_at	2.27e-08	1.5e-09	7.05029	11.4686	2.08598	SDC3	syndecan 3	9672			NM_014654
201853_s_at	2.3e-08	1.52e-09	7.04652	11.4536	0.776699	CDC25B	cell division cycle 25B	994			NM_021873
222234_s_at	2.32e-08	1.53e-09	7.04428	11.4447	2.32468	DBNDD1	dysbindin domain containing 1	79007			AK022644
222052_at	2.38e-08	1.57e-09	7.03783	11.4191	0.776858	C19orf54	chromosome 19 open reading frame 54	284325
221591_s_at	2.4e-08	1.59e-09	7.035	11.4078	1.04066	FAM64A	family with sequence similarity 64 member A	54478			BC005004
212805_at	2.45e-08	1.63e-09	7.02945	11.3857	1.55881	PRUNE2	prune homolog 2	158471			AB002365
221620_s_at	2.47e-08	1.64e-09	7.02771	11.3788	0.713111	APOO	apolipoprotein O	79135			AF061264
218273_s_at	2.48e-08	1.65e-09	7.02652	11.3741	1.72786	PDP1	pyruvate dehyrogenase phosphatase catalytic subunit 1	54704			NM_018444
38918_at	2.48e-08	1.65e-09	7.02612	11.3725	0.805744	SOX13	SRY-box 13	9580			AF083105
218812_s_at	2.51e-08	1.67e-09	7.02279	11.3592	0.910636	ORAI2	ORAI calcium release-activated calcium modulator 2	80228			NM_032831
219520_s_at	2.51e-08	1.67e-09	7.02234	11.3574	0.973679	WWC3	WWC family member 3	55841			NM_015691
201584_s_at	2.57e-08	1.71e-09	7.01677	11.3353	0.737644	DDX39A	DEAD-box helicase 39A	10212			NM_005804
204647_at	2.58e-08	1.72e-09	7.01574	11.3311	1.44702	HOMER3	homer scaffolding protein 3	9454			NM_004838
212563_at	2.6e-08	1.74e-09	7.01274	11.3192	1.3468	MIR7112///BOP1	microRNA 7112///block of proliferation 1	102465906///23246			BG491842
212858_at	2.61e-08	1.75e-09	7.01145	11.3141	0.950613	PAQR4	progestin and adipoQ receptor family member 4	124222			AL520675
201931_at	2.64e-08	1.78e-09	7.00799	11.3003	1.16409	ETFA	electron transfer flavoprotein alpha subunit	2108			NM_000126
218726_at	2.69e-08	1.81e-09	7.00289	11.28	1.65048	HJURP	Holliday junction recognition protein	55355			NM_018410
201471_s_at	2.75e-08	1.85e-09	6.99742	11.2583	0.699373	SQSTM1	sequestosome 1	8878			NM_003900
208285_at	2.78e-08	1.87e-09	6.99469	11.2474	2.55636	OR7A5	olfactory receptor family 7 subfamily A member 5	26659			NM_017506
209204_at	2.79e-08	1.88e-09	6.99336	11.2421	1.26624	LMO4	LIM domain only 4	8543
201541_s_at	2.9e-08	1.97e-09	6.9824	11.1985	1.36321	ZNHIT1	zinc finger HIT-type containing 1	10467			NM_006349
203025_at	2.9e-08	1.97e-09	6.98231	11.1982	0.786338	NAA10	N(alpha)-acetyltransferase 10, NatA catalytic subunit	8260			NM_003491
203040_s_at	2.9e-08	1.97e-09	6.98223	11.1979	0.789527	HMBS	hydroxymethylbilane synthase	3145			NM_000190
218801_at	2.96e-08	2.02e-09	6.97641	11.1747	1.03705	UGGT2	UDP-glucose glycoprotein glucosyltransferase 2	55757			NM_020121
215311_at	2.97e-08	2.03e-09	6.9751	11.1695	4.96293	NTRK3	neurotrophic receptor tyrosine kinase 3	4916			AL109696
213746_s_at	3.03e-08	2.07e-09	6.9702	11.15	2.00064	FLNA	filamin A	2316
204559_s_at	3.03e-08	2.07e-09	6.96994	11.149	1.00232	LSM7	LSM7 homolog, U6 small nuclear RNA and mRNA degradation associated	51690			NM_016199
201184_s_at	3.06e-08	2.09e-09	6.96719	11.138	0.72312	CHD4	chromodomain helicase DNA binding protein 4	1108			NM_001273
201038_s_at	3.07e-08	2.11e-09	6.96565	11.1319	1.08687	ANP32A	acidic nuclear phosphoprotein 32 family member A	8125			T67821
202041_s_at	3.09e-08	2.12e-09	6.96368	11.1241	0.526858	FIBP	FGF1 intracellular binding protein	9158			NM_004214
214728_x_at	3.09e-08	2.13e-09	6.96351	11.1234	0.929639	SMARCA4	SWI/SNF related, matrix associated, actin dependent regulator of chromatin, subfamily a, member 4	6597
204494_s_at	3.1e-08	2.13e-09	6.96294	11.1212	0.916247	C15orf39	chromosome 15 open reading frame 39	56905			AW516789
219282_s_at	3.11e-08	2.14e-09	6.96136	11.1149	0.97612	TRPV2	transient receptor potential cation channel subfamily V member 2	51393			NM_016113
200981_x_at	3.13e-08	2.15e-09	6.96006	11.1097	0.858815	GNAS	GNAS complex locus	2778			NM_016592
204814_at	3.21e-08	2.21e-09	6.95338	11.0831	1.53928	CADPS	calcium dependent secretion activator	8618			NM_003716
214548_x_at	3.32e-08	2.29e-09	6.94474	11.0488	0.936088	GNAS	GNAS complex locus	2778			AF064092
213007_at	3.33e-08	2.31e-09	6.94339	11.0434	1.51627	FANCI	Fanconi anemia complementation group I	55215			W74442
200755_s_at	3.34e-08	2.31e-09	6.94286	11.0413	1.7435	CALU	calumenin	813			BF939365
212285_s_at	3.38e-08	2.35e-09	6.93887	11.0255	1.34739	AGRN	agrin	375790
204475_at	3.47e-08	2.41e-09	6.93206	10.9984	5.01165	MMP1	matrix metallopeptidase 1	4312			NM_002421
201609_x_at	3.51e-08	2.44e-09	6.92901	10.9863	0.534251	ICMT	isoprenylcysteine carboxyl methyltransferase	23463			AL578502
200903_s_at	3.52e-08	2.46e-09	6.9274	10.9799	1.15429	AHCY	adenosylhomocysteinase	191			NM_000687
218086_at	3.63e-08	2.55e-09	6.9189	10.9461	1.64449	NPDC1	neural proliferation, differentiation and control 1	56654			NM_015392
213798_s_at	3.74e-08	2.63e-09	6.91089	10.9144	0.869766	CAP1	adenylate cyclase associated protein 1	10487
218648_at	3.86e-08	2.71e-09	6.90291	10.8826	1.03702	CRTC3	CREB regulated transcription coactivator 3	64784			NM_022769
201341_at	3.86e-08	2.72e-09	6.90274	10.882	1.30537	ENC1	ectodermal-neural cortex 1	8507			NM_003633
221744_at	3.94e-08	2.78e-09	6.89745	10.861	0.896228	DCAF7	DDB1 and CUL4 associated factor 7	10238			AK026008
214830_at	4.18e-08	2.95e-09	6.88203	10.7998	1.22214	SLC38A6	solute carrier family 38 member 6	145389
210211_s_at	4.18e-08	2.95e-09	6.88202	10.7997	0.726016	HSP90AA1	heat shock protein 90 alpha family class A member 1	3320			AF028832
202983_at	4.25e-08	3.01e-09	6.87745	10.7816	0.902488	HLTF	helicase like transcription factor	6596			AI760760
211752_s_at	4.25e-08	3.01e-09	6.87723	10.7807	1.03648	NDUFS7	NADH:ubiquinone oxidoreductase core subunit S7	374291			BC005954
210926_at	4.25e-08	3.01e-09	6.87721	10.7806	1.43014	POTEKP	POTE ankyrin domain family member K, pseudogene	440915			AY014272
215159_s_at	4.26e-08	3.02e-09	6.87646	10.7777	1.48438	NADK	NAD kinase	65220
209166_s_at	4.27e-08	3.03e-09	6.87572	10.7747	0.905078	MAN2B1	mannosidase alpha class 2B member 1	4125			U68567
200628_s_at	4.27e-08	3.03e-09	6.87572	10.7747	2.18405	WARS	tryptophanyl-tRNA synthetase	7453			M61715
211984_at	4.27e-08	3.04e-09	6.87509	10.7722	0.964731	CALM3///CALM2///CALM1	calmodulin 3///calmodulin 2///calmodulin 1	808///805///801			AI653730
201051_at	4.29e-08	3.05e-09	6.87396	10.7677	1.23608	ANP32A	acidic nuclear phosphoprotein 32 family member A	8125			BE560202
212383_at	4.37e-08	3.11e-09	6.86894	10.7478	0.88236	ATP6V0A1	ATPase H+ transporting V0 subunit a1	535			AL096733
213507_s_at	4.39e-08	3.14e-09	6.86705	10.7403	1.00286	KPNB1	karyopherin subunit beta 1	3837			BG249565
208715_at	4.4e-08	3.14e-09	6.86686	10.7395	0.617145	TMCO1	transmembrane and coiled-coil domains 1	54499			BF002031
218301_at	4.46e-08	3.19e-09	6.86289	10.7238	0.753353	RNPEPL1	arginyl aminopeptidase like 1	57140			NM_018226
213039_at	4.5e-08	3.22e-09	6.86076	10.7154	0.535164	ARHGEF18	Rho/Rac guanine nucleotide exchange factor 18	23370			AB011093
202095_s_at	4.51e-08	3.23e-09	6.85965	10.711	1.36019	BIRC5	baculoviral IAP repeat containing 5	332			NM_001168
201144_s_at	4.56e-08	3.27e-09	6.85682	10.6997	0.598364	EIF2S1	eukaryotic translation initiation factor 2 subunit alpha	1965			NM_004094
217249_x_at	4.59e-08	3.3e-09	6.85479	10.6917	0.702388
209158_s_at	4.64e-08	3.33e-09	6.8522	10.6814	0.931262	CYTH2	cytohesin 2	9266			BC004361
202094_at	4.69e-08	3.37e-09	6.84922	10.6696	1.76746	BIRC5	baculoviral IAP repeat containing 5	332			AA648913
218349_s_at	4.71e-08	3.39e-09	6.84788	10.6643	1.87184	ZWILCH	zwilch kinetochore protein	55055			NM_017975
202860_at	4.82e-08	3.48e-09	6.84137	10.6384	0.933812	DENND4B	DENN domain containing 4B	9909			NM_014856
215834_x_at	4.86e-08	3.51e-09	6.83909	10.6294	1.91028	SCARB1	scavenger receptor class B member 1	949			AV708130
212993_at	4.87e-08	3.52e-09	6.83836	10.6265	0.945086	NACC2	NACC family member 2	138151			AA114166
202361_at	4.92e-08	3.56e-09	6.8356	10.6156	0.65218	SEC24C	SEC24 homolog C, COPII coat complex component	9632			NM_004922
212796_s_at	4.94e-08	3.58e-09	6.83429	10.6104	1.13057	TBC1D2B	TBC1 domain family member 2B	23102			BF195608
202440_s_at	5.11e-08	3.71e-09	6.82552	10.5756	0.932699	ST5	suppression of tumorigenicity 5	6764			NM_005418
205164_at	5.13e-08	3.72e-09	6.82457	10.5718	2.11426	GCAT	glycine C-acetyltransferase	23464			NM_014291
204970_s_at	5.33e-08	3.88e-09	6.81418	10.5307	0.994923	MAFG	MAF bZIP transcription factor G	4097			NM_002359
216952_s_at	5.35e-08	3.9e-09	6.81328	10.5271	1.064	LMNB2	lamin B2	84823			M94363
202124_s_at	5.37e-08	3.92e-09	6.8118	10.5212	1.57027	TRAK2	trafficking kinesin protein 2	66008			AV705253
87100_at	5.38e-08	3.93e-09	6.81109	10.5184	3.01648	ABHD2	abhydrolase domain containing 2	11057			AI832249
209825_s_at	5.58e-08	4.09e-09	6.80148	10.4803	1.56399	MIR3658///UCK2	microRNA 3658///uridine-cytidine kinase 2	100500832///7371			BC002906
212450_at	5.58e-08	4.09e-09	6.80137	10.4799	1.31572	SECISBP2L	SECIS binding protein 2 like	9728			D87445
202027_at	5.58e-08	4.09e-09	6.80127	10.4795	0.727359	TMEM184B	transmembrane protein 184B	25829			NM_012264
201486_at	5.72e-08	4.2e-09	6.79476	10.4537	1.36364	RCN2	reticulocalbin 2	5955			NM_002902
200788_s_at	5.77e-08	4.24e-09	6.79221	10.4436	0.600797	PEA15	phosphoprotein enriched in astrocytes 15	8682			NM_003768
204967_at	5.78e-08	4.25e-09	6.79165	10.4414	0.902391	SHROOM2	shroom family member 2	357			NM_001649
217799_x_at	5.84e-08	4.3e-09	6.78883	10.4302	1.4979	UBE2H	ubiquitin conjugating enzyme E2 H	7328			NM_003344
207592_s_at	5.91e-08	4.36e-09	6.78574	10.418	2.2019	HCN2	hyperpolarization activated cyclic nucleotide gated potassium channel 2	610			NM_001194
221050_s_at	5.97e-08	4.4e-09	6.78335	10.4085	0.605999	GTPBP2	GTP binding protein 2	54676			NM_019096
220956_s_at	6.03e-08	4.45e-09	6.78073	10.3981	0.791779	RAB4B-EGLN2///EGLN2	RAB4B-EGLN2 readthrough (NMD candidate)///egl-9 family hypoxia inducible factor 2	100529264///112398
205037_at	6.12e-08	4.52e-09	6.77643	10.3811	0.950051	IFT27	intraflagellar transport 27	11020			NM_006860
209617_s_at	6.26e-08	4.63e-09	6.77076	10.3587	1.62975	CTNND2	catenin delta 2	1501			AF035302
221521_s_at	6.27e-08	4.63e-09	6.77043	10.3573	2.25662	GINS2	GINS complex subunit 2	51659			BC003186
213131_at	6.42e-08	4.76e-09	6.76351	10.33	1.53144	OLFM1	olfactomedin 1	10439			R38389
205905_s_at	6.51e-08	4.84e-09	6.75958	10.3144	0.924576	MICA///MICB	MHC class I polypeptide-related sequence A///MHC class I polypeptide-related sequence B	100507436///4277			NM_000247
218120_s_at	6.54e-08	4.87e-09	6.758	10.3081	0.812127	HMOX2	heme oxygenase 2	3163			D21243
209488_s_at	6.58e-08	4.9e-09	6.75638	10.3017	1.80635	RBPMS	RNA binding protein with multiple splicing	11030			D84109
209048_s_at	6.62e-08	4.94e-09	6.75457	10.2946	0.799482	ZMYND8	zinc finger MYND-type containing 8	23613			AB032951
218774_at	6.67e-08	4.98e-09	6.75248	10.2863	1.35444	DCPS	decapping enzyme, scavenger	28960			NM_014026
205996_s_at	6.68e-08	4.99e-09	6.75229	10.2855	1.00834	AK2	adenylate kinase 2	204			NM_013411
221767_x_at	6.7e-08	5.01e-09	6.75113	10.2809	0.520083	HDLBP	high density lipoprotein binding protein	3069			AA515560
218585_s_at	6.89e-08	5.15e-09	6.744	10.2527	1.36985	DTL	denticleless E3 ubiquitin protein ligase homolog	51514			NM_016448
213402_at	7.04e-08	5.27e-09	6.73832	10.2302	1.33599	ZNF787	zinc finger protein 787	126208			AA029811
212955_s_at	7.14e-08	5.36e-09	6.73445	10.2149	0.742201	POLR2I	RNA polymerase II subunit I	5438			AL037557
64438_at	7.2e-08	5.41e-09	6.7322	10.206	0.596847	OGFOD3	2-oxoglutarate and iron dependent oxygenase domain containing 3	79701			W19668
33304_at	7.22e-08	5.43e-09	6.73108	10.2016	1.59572	ISG20	interferon stimulated exonuclease gene 20	3669			U88964
200615_s_at	7.22e-08	5.43e-09	6.73094	10.2011	0.826344	AP2B1	adaptor related protein complex 2 beta 1 subunit	163			AL567295
203501_at	7.24e-08	5.45e-09	6.73026	10.1984	1.26107	CPQ	carboxypeptidase Q	10404			NM_016134
212518_at	7.28e-08	5.48e-09	6.72868	10.1921	0.676385	PIP5K1C	phosphatidylinositol-4-phosphate 5-kinase type 1 gamma	23396			AB011161
211628_x_at	7.29e-08	5.5e-09	6.72793	10.1892	0.937144	FTH1P5	ferritin heavy chain 1 pseudogene 5	2509			J04755
217800_s_at	7.4e-08	5.59e-09	6.72379	10.1728	0.583178	NDFIP1	Nedd4 family interacting protein 1	80762			NM_030571
209194_at	7.45e-08	5.64e-09	6.72177	10.1648	0.509784	CETN2	centrin 2	1069			BC005334
219895_at	7.46e-08	5.65e-09	6.7213	10.163	2.61535	TMEM255A	transmembrane protein 255A	55026			NM_017938
210966_x_at	7.48e-08	5.66e-09	6.72075	10.1608	1.02902	LARP1	La ribonucleoprotein domain family member 1	23367			BC001460
214656_x_at	7.51e-08	5.69e-09	6.71964	10.1563	1.0478	MYO1C	myosin IC	4641			BE790157
218029_at	7.58e-08	5.75e-09	6.717	10.1459	1.38272	FAM65A	family with sequence similarity 65 member A	79567			NM_024519
202638_s_at	7.65e-08	5.81e-09	6.71431	10.1353	1.23727	ICAM1	intercellular adhesion molecule 1	3383			NM_000201
203076_s_at	7.65e-08	5.81e-09	6.71422	10.1349	0.717147	SMAD2	SMAD family member 2	4087			U65019
221752_at	7.68e-08	5.84e-09	6.71303	10.1302	0.930554	SSH1	slingshot protein phosphatase 1	54434			AL041728
201726_at	7.74e-08	5.9e-09	6.71054	10.1204	0.512074	ELAVL1	ELAV like RNA binding protein 1	1994			BC003376
218681_s_at	7.76e-08	5.91e-09	6.70998	10.1182	0.680857	SDF2L1	stromal cell derived factor 2 like 1	23753			NM_022044
209408_at	8.02e-08	6.14e-09	6.70038	10.0802	0.991972	KIF2C	kinesin family member 2C	11004			U63743
211858_x_at	8.07e-08	6.18e-09	6.69881	10.074	1.15003	GNAS	GNAS complex locus	2778			AF088184
219249_s_at	8.07e-08	6.19e-09	6.69843	10.0725	1.7429	FKBP10	FK506 binding protein 10	60681			NM_021939
206397_x_at	8.18e-08	6.29e-09	6.69449	10.0569	2.51695	CERS1///GDF1	ceramide synthase 1///growth differentiation factor 1	10715///2657			NM_001492
212663_at	8.28e-08	6.37e-09	6.69137	10.0446	0.601659	FKBP15	FK506 binding protein 15	23307			AB014574
207628_s_at	8.45e-08	6.53e-09	6.68511	10.0199	0.764991	WBSCR22	Williams-Beuren syndrome chromosome region 22	114049			NM_017528
210559_s_at	8.6e-08	6.66e-09	6.68042	10.0014	1.02106	CDK1	cyclin dependent kinase 1	983			D88357
203927_at	8.61e-08	6.67e-09	6.67994	9.99945	0.718777	NFKBIE	NFKB inhibitor epsilon	4794			NM_004556
217949_s_at	8.64e-08	6.71e-09	6.67865	9.99434	0.958082	VKORC1	vitamin K epoxide reductase complex subunit 1	79001			NM_024006
212541_at	8.74e-08	6.78e-09	6.67578	9.983	0.801139	FLAD1	flavin adenine dinucleotide synthetase 1	80308			AL562282
202604_x_at	8.76e-08	6.8e-09	6.67508	9.98023	0.842335	ADAM10	ADAM metallopeptidase domain 10	102			NM_001110
218593_at	8.78e-08	6.82e-09	6.67441	9.97762	0.918865	RBM28	RNA binding motif protein 28	55131			NM_018077
201046_s_at	9e-08	7.01e-09	6.66747	9.95019	0.931054	RAD23A	RAD23 homolog A, nucleotide excision repair protein	5886			NM_005053
221983_at	9.14e-08	7.13e-09	6.66347	9.93437	0.925621	FAM134A	family with sequence similarity 134 member A	79137			AL040896
219363_s_at	9.34e-08	7.29e-09	6.65777	9.91186	0.989957	MTERF3	mitochondrial transcription termination factor 3	51001			NM_015942
212801_at	9.71e-08	7.6e-09	6.64764	9.87187	0.615247	MIR1178///CIT	microRNA 1178///citron rho-interacting serine/threonine kinase	100302274///11113			AI861788
212193_s_at	9.78e-08	7.68e-09	6.64506	9.8617	1.62008	LARP1	La ribonucleoprotein domain family member 1	23367			BE881529
205678_at	9.82e-08	7.71e-09	6.64391	9.85715	1.00279	AP3B2	adaptor related protein complex 3 beta 2 subunit	8120			NM_004644
203342_at	1.01e-07	7.98e-09	6.63547	9.82387	0.868224	TIMM17B	translocase of inner mitochondrial membrane 17 homolog B (yeast)	10245			NM_005834
205405_at	1.02e-07	8e-09	6.63492	9.82168	1.57533	SEMA5A	semaphorin 5A	9037			NM_003966
217891_at	1.03e-07	8.11e-09	6.6315	9.80819	1.31807	C16orf58	chromosome 16 open reading frame 58	64755			NM_022744
212863_x_at	1.03e-07	8.16e-09	6.62994	9.80202	0.931112	CTBP1	C-terminal binding protein 1	1487			BF337195
203723_at	1.04e-07	8.2e-09	6.6286	9.79674	2.07822	ITPKB	inositol-trisphosphate 3-kinase B	3707			NM_002221
204501_at	1.04e-07	8.21e-09	6.62833	9.79568	1.30445	NOV	nephroblastoma overexpressed	4856			NM_002514
211048_s_at	1.06e-07	8.36e-09	6.62383	9.77791	0.818438	PDIA4	protein disulfide isomerase family A member 4	9601			BC006344
218321_x_at	1.06e-07	8.39e-09	6.62297	9.77453	1.0709	STYXL1	serine/threonine/tyrosine interacting-like 1	51657			NM_016086
201481_s_at	1.06e-07	8.4e-09	6.62277	9.77376	2.2368	PYGB	phosphorylase, glycogen; brain	5834			NM_002862
211924_s_at	1.06e-07	8.43e-09	6.62179	9.76988	1.77982	PLAUR	plasminogen activator, urokinase receptor	5329			AY029180
214896_at	1.06e-07	8.44e-09	6.62137	9.76821	2.44291	LINC01314	long intergenic non-protein coding RNA 1314	100996492			AL109671
209932_s_at	1.08e-07	8.64e-09	6.61569	9.74583	1.42244	DUT	deoxyuridine triphosphatase	1854			U90223
202952_s_at	1.1e-07	8.74e-09	6.61286	9.73468	2.3608	ADAM12	ADAM metallopeptidase domain 12	8038			NM_003474
204334_at	1.1e-07	8.77e-09	6.61187	9.73076	0.584207	KLF7	Kruppel like factor 7	8609			AA488672
209563_x_at	1.11e-07	8.84e-09	6.60998	9.72332	0.72553	CALM3///CALM2///CALM1	calmodulin 3///calmodulin 2///calmodulin 1	808///805///801			BC000454
212122_at	1.13e-07	9.03e-09	6.60459	9.70206	1.08863	RHOQ	ras homolog family member Q	23433			AW771590
201930_at	1.18e-07	9.51e-09	6.59175	9.65144	0.769871	MCM6	minichromosome maintenance complex component 6	4175			NM_005915
210951_x_at	1.18e-07	9.51e-09	6.59162	9.6509	1.04563	RAB27A	RAB27A, member RAS oncogene family	5873			AF125393
203729_at	1.18e-07	9.52e-09	6.5916	9.65084	1.52383	EMP3	epithelial membrane protein 3	2014			NM_001425
210127_at	1.19e-07	9.62e-09	6.58885	9.64001	1.20446	RAB6B	RAB6B, member RAS oncogene family	51560			BC002510
218037_at	1.22e-07	9.83e-09	6.58354	9.61906	0.693289	FAM134A	family with sequence similarity 134 member A	79137			NM_024293
202069_s_at	1.24e-07	1e-08	6.57802	9.59734	1.19733	IDH3A	isocitrate dehydrogenase 3 (NAD(+)) alpha	3419			AI826060
200601_at	1.25e-07	1.01e-08	6.57596	9.58921	1.39567	ACTN4	actinin alpha 4	81			U48734
217529_at	1.26e-07	1.02e-08	6.57496	9.58525	1.65395	ORAI2	ORAI calcium release-activated calcium modulator 2	80228			BE547674
212015_x_at	1.26e-07	1.02e-08	6.57369	9.58026	0.844002	MIR4745///PTBP1	microRNA 4745///polypyrimidine tract binding protein 1	100616459///5725			BF690062
219157_at	1.32e-07	1.07e-08	6.56139	9.53181	1.34742	KLHL2	kelch like family member 2	11275			NM_007246
209487_at	1.34e-07	1.09e-08	6.55768	9.51719	1.12424	RBPMS	RNA binding protein with multiple splicing	11030			D84109
211928_at	1.34e-07	1.09e-08	6.55735	9.5159	1.00805	DYNC1H1	dynein cytoplasmic 1 heavy chain 1	1778			AB002323
200783_s_at	1.36e-07	1.11e-08	6.55388	9.50224	0.995459	STMN1	stathmin 1	3925			NM_005563
213474_at	1.36e-07	1.11e-08	6.55232	9.4961	1.44277	KCTD7///RABGEF1	potassium channel tetramerization domain containing 7///RAB guanine nucleotide exchange factor 1	154881///27342			AI890903
205320_at	1.37e-07	1.12e-08	6.5518	9.49406	1.13693	APC2	APC2, WNT signaling pathway regulator	10297			NM_005883
210554_s_at	1.37e-07	1.12e-08	6.55107	9.49116	1.05005	CTBP2	C-terminal binding protein 2	1488			BC002486
218837_s_at	1.37e-07	1.12e-08	6.55067	9.4896	0.729491	UBE2D4	ubiquitin conjugating enzyme E2 D4 (putative)	51619			NM_015983
201634_s_at	1.39e-07	1.14e-08	6.54658	9.47348	0.942085	CYB5B	cytochrome b5 type B	80777			NM_030579
202090_s_at	1.41e-07	1.16e-08	6.54272	9.4583	0.743512	UQCR11	ubiquinol-cytochrome c reductase, complex III subunit XI	10975			NM_006830
212024_x_at	1.42e-07	1.16e-08	6.54127	9.45258	0.791514	FLII	FLII, actin remodeling protein	2314			U80184
215714_s_at	1.42e-07	1.17e-08	6.53968	9.44633	1.04014	SMARCA4	SWI/SNF related, matrix associated, actin dependent regulator of chromatin, subfamily a, member 4	6597			AF254822
200875_s_at	1.44e-07	1.19e-08	6.53685	9.4352	0.738649	MIR1292///SNORD110///SNORD86///SNORD57///NOP56	microRNA 1292///small nucleolar RNA, C/D box 110///small nucleolar RNA, C/D box 86///small nucleolar RNA, C/D box 57///NOP56 ribonucleoprotein	100302138///692213///692201///26792///10528			NM_006392
213720_s_at	1.47e-07	1.21e-08	6.53072	9.41107	0.980701	SMARCA4	SWI/SNF related, matrix associated, actin dependent regulator of chromatin, subfamily a, member 4	6597
45749_at	1.49e-07	1.23e-08	6.5275	9.39843	0.579001	FAM65A	family with sequence similarity 65 member A	79567			AA400206
205264_at	1.53e-07	1.27e-08	6.51977	9.368	0.888301	CD3EAP	CD3e molecule associated protein	10849			NM_012099
211271_x_at	1.53e-07	1.27e-08	6.51928	9.36608	0.797884	MIR4745///PTBP1	microRNA 4745///polypyrimidine tract binding protein 1	100616459///5725			BC004383
215728_s_at	1.53e-07	1.27e-08	6.5192	9.36576	0.81677	ACOT7	acyl-CoA thioesterase 7	11332
219663_s_at	1.54e-07	1.28e-08	6.51845	9.36282	1.17139	TMEM121	transmembrane protein 121	80757			NM_025268
201828_x_at	1.57e-07	1.31e-08	6.51192	9.33714	0.745886	FAM127A	family with sequence similarity 127 member A	8933
203272_s_at	1.58e-07	1.32e-08	6.51095	9.33331	0.960501	TUSC2	tumor suppressor candidate 2	11334			BF308548
208659_at	1.58e-07	1.32e-08	6.51093	9.33325	0.964562	CLIC1	chloride intracellular channel 1	1192			AF034607
221575_at	1.58e-07	1.32e-08	6.50967	9.32829	0.563082	SCLY	selenocysteine lyase	51540			BC000586
213333_at	1.59e-07	1.33e-08	6.50787	9.32121	1.06859	MDH2	malate dehydrogenase 2	4191			AL520774
217752_s_at	1.6e-07	1.33e-08	6.50722	9.31864	0.900775	CNDP2	CNDP dipeptidase 2 (metallopeptidase M20 family)	55748			NM_018235
217769_s_at	1.61e-07	1.35e-08	6.50465	9.30854	0.594866	POMP	proteasome maturation protein	51371			NM_015932
205691_at	1.62e-07	1.36e-08	6.50274	9.30105	2.1573	SYNGR3	synaptogyrin 3	9143			NM_004209
203668_at	1.65e-07	1.38e-08	6.49851	9.2844	1.02037	MAN2C1	mannosidase alpha class 2C member 1	4123			NM_006715
211833_s_at	1.67e-07	1.4e-08	6.49524	9.27156	1.78888	BAX	BCL2 associated X, apoptosis regulator	581			U19599
201485_s_at	1.68e-07	1.41e-08	6.49387	9.26615	1.34266	RCN2	reticulocalbin 2	5955			BC004892
218022_at	1.68e-07	1.41e-08	6.49294	9.26251	1.12679	VRK3	vaccinia related kinase 3	51231			NM_016440
201128_s_at	1.68e-07	1.41e-08	6.49293	9.26245	0.758969	ACLY	ATP citrate lyase	47			NM_001096
37117_at	1.74e-07	1.47e-08	6.48295	9.22324	1.95211	PRR5-ARHGAP8///ARHGAP8	PRR5-ARHGAP8 readthrough///Rho GTPase activating protein 8	553158///23779
213573_at	1.75e-07	1.48e-08	6.48148	9.21749	1.04745	KPNB1	karyopherin subunit beta 1	3837			AA861608
44790_s_at	1.8e-07	1.52e-08	6.47459	9.19041	0.938816	KIAA0226L	KIAA0226 like	80183
209505_at	1.84e-07	1.56e-08	6.46886	9.1679	1.96608	NR2F1	nuclear receptor subfamily 2 group F member 1	7025
206230_at	1.91e-07	1.62e-08	6.45826	9.12628	1.71416	LHX1	LIM homeobox 1	3975			NM_005568
201381_x_at	1.92e-07	1.63e-08	6.45715	9.12192	0.692153	CACYBP	calcyclin binding protein	27101			AF057356
205282_at	1.94e-07	1.65e-08	6.4542	9.11036	0.943405	LRP8	LDL receptor related protein 8	7804			NM_004631
204871_at	1.94e-07	1.65e-08	6.45366	9.10822	1.58899	MTERF1	mitochondrial transcription termination factor 1	7978			NM_006980
201418_s_at	1.96e-07	1.67e-08	6.45086	9.09725	1.34593	SOX4	SRY-box 4	6659			NM_003107
33736_at	1.98e-07	1.69e-08	6.44804	9.08615	1.35126	STOML1	stomatin like 1	9399			Y16522
201847_at	1.99e-07	1.71e-08	6.44597	9.07806	1.20604	LIPA	lipase A, lysosomal acid type	3988			NM_000235
64942_at	2.01e-07	1.72e-08	6.44417	9.071	1.07963	GPR153	G protein-coupled receptor 153	387509			AI937160
208636_at	2.03e-07	1.74e-08	6.4412	9.05934	1.12708	ACTN1	actinin alpha 1	87
205003_at	2.03e-07	1.74e-08	6.44033	9.05591	1.00714	DOCK4	dedicator of cytokinesis 4	9732			NM_014705
207163_s_at	2.05e-07	1.76e-08	6.43757	9.04508	1.88828	AKT1	AKT serine/threonine kinase 1	207			NM_005163
203366_at	2.07e-07	1.78e-08	6.43501	9.03504	1.04303	POLG	DNA polymerase gamma, catalytic subunit	5428			NM_002693
201460_at	2.11e-07	1.81e-08	6.43097	9.01919	0.461857	MAPKAPK2	mitogen-activated protein kinase-activated protein kinase 2	9261			AI141802
200733_s_at	2.18e-07	1.89e-08	6.42095	8.9799	0.823412	PTP4A1	protein tyrosine phosphatase type IVA, member 1	7803			U48296
218952_at	2.21e-07	1.91e-08	6.41827	8.9694	2.38639	PCSK1N	proprotein convertase subtilisin/kexin type 1 inhibitor	27344			NM_013271
216306_x_at	2.24e-07	1.94e-08	6.41373	8.95159	0.766005	MIR4745///PTBP1	microRNA 4745///polypyrimidine tract binding protein 1	100616459///5725			X62006
209049_s_at	2.27e-07	1.96e-08	6.41069	8.93968	0.798987	ZMYND8	zinc finger MYND-type containing 8	23613
222039_at	2.3e-07	1.99e-08	6.4069	8.92482	1.00207	KIF18B	kinesin family member 18B	146909
201673_s_at	2.33e-07	2.03e-08	6.40305	8.90971	0.770904	GYS1	glycogen synthase 1	2997			NM_002103
202941_at	2.35e-07	2.04e-08	6.40076	8.90076	0.728831	NDUFV2	NADH:ubiquinone oxidoreductase core subunit V2	4729			NM_021074
211015_s_at	2.36e-07	2.05e-08	6.39947	8.89568	0.859536	HSPA4	heat shock protein family A (Hsp70) member 4	3308			L12723
219918_s_at	2.37e-07	2.06e-08	6.39905	8.89405	1.28335	ASPM	abnormal spindle microtubule assembly	259266			NM_018136
203590_at	2.4e-07	2.09e-08	6.39497	8.87805	1.27757	DYNC1LI2	dynein cytoplasmic 1 light intermediate chain 2	1783			NM_006141
212290_at	2.41e-07	2.1e-08	6.39348	8.87224	1.12736	SLC7A1	solute carrier family 7 member 1	6541			AA527433
200925_at	2.44e-07	2.13e-08	6.39036	8.86	0.617509	COX6A1	cytochrome c oxidase subunit 6A1	1337			NM_004373
202589_at	2.45e-07	2.14e-08	6.38916	8.85531	1.15521	TYMS	thymidylate synthetase	7298			NM_001071
219218_at	2.45e-07	2.14e-08	6.38887	8.85414	1.20045	BAHCC1	BAH domain and coiled-coil containing 1	57597
201817_at	2.47e-07	2.16e-08	6.38696	8.84667	0.824765	UBE3C	ubiquitin protein ligase E3C	9690			NM_014671
78495_at	2.48e-07	2.17e-08	6.38611	8.84336	1.08381	ZNF783	zinc finger family member 783	100289678			R61320
216813_at	2.48e-07	2.17e-08	6.38589	8.84249	2.24145						AL512728
201923_at	2.48e-07	2.18e-08	6.38517	8.83966	0.801834	PRDX4	peroxiredoxin 4	10549			NM_006406
212949_at	2.51e-07	2.2e-08	6.38213	8.82776	1.64269	NCAPH	non-SMC condensin I complex subunit H	23397			D38553
221876_at	2.52e-07	2.21e-08	6.38129	8.82447	0.832873	ZNF783	zinc finger family member 783	100289678			AU151157
202745_at	2.53e-07	2.22e-08	6.37971	8.81829	0.915769	USP8	ubiquitin specific peptidase 8	9101			NM_005154
209391_at	2.58e-07	2.27e-08	6.37504	8.79998	0.878992	DPM2	dolichyl-phosphate mannosyltransferase subunit 2, regulatory	8818			AF061729
218057_x_at	2.66e-07	2.34e-08	6.36696	8.76837	0.720058	EMC8	ER membrane protein complex subunit 8	10328			NM_006067
34221_at	2.68e-07	2.35e-08	6.3653	8.76188	0.543839	HMGXB3	HMG-box containing 3	22993			D83778
213318_s_at	2.68e-07	2.36e-08	6.36494	8.76047	0.927713	BAG6	BCL2 associated athanogene 6	7917			BG028844
219439_at	2.68e-07	2.36e-08	6.36436	8.75817	0.826269	C1GALT1	core 1 synthase, glycoprotein-N-acetylgalactosamine 3-beta-galactosyltransferase 1	56913			NM_020156
201881_s_at	2.68e-07	2.37e-08	6.36414	8.75731	0.875707	ARIH1	ariadne RBR E3 ubiquitin protein ligase 1	25820			NM_005744
218700_s_at	2.75e-07	2.43e-08	6.35741	8.731	0.923799	RAB29	RAB29, member RAS oncogene family	8934			BC002585
203452_at	2.75e-07	2.43e-08	6.35727	8.73042	1.83927	B3GAT3	beta-1,3-glucuronyltransferase 3	26229			NM_012200
209524_at	2.76e-07	2.43e-08	6.35696	8.72922	0.835128	HDGFRP3	hepatoma-derived growth factor, related protein 3	50810
212655_at	2.78e-07	2.46e-08	6.3546	8.71998	1.07869	ZCCHC14	zinc finger CCHC-type containing 14	23174			AB011151
211013_x_at	2.8e-07	2.47e-08	6.35287	8.71322	2.2506	PML	promyelocytic leukemia	5371			AF230411
219708_at	2.85e-07	2.53e-08	6.34765	8.69282	1.63936	NT5M	5',3'-nucleotidase, mitochondrial	56953			NM_020201
217903_at	2.87e-07	2.54e-08	6.34604	8.68649	0.675771	STRN4	striatin 4	29888			NM_013403
202836_s_at	2.88e-07	2.55e-08	6.34497	8.68233	0.907512	TXNL4A	thioredoxin like 4A	10907			NM_006701
211012_s_at	2.95e-07	2.62e-08	6.33834	8.6564	2.3845	PML	promyelocytic leukemia	5371			BC000080
212576_at	2.95e-07	2.63e-08	6.33767	8.65379	0.908487	MGRN1	mahogunin ring finger 1	23295			AB011116
210719_s_at	3.01e-07	2.69e-08	6.3324	8.63314	1.3632	HMG20B	high mobility group 20B	10362			BC002552
204467_s_at	3.03e-07	2.7e-08	6.33066	8.62635	1.50194	SNCA	synuclein alpha	6622			NM_000345
201365_at	3.07e-07	2.75e-08	6.32683	8.6114	0.737725	OAZ2	ornithine decarboxylase antizyme 2	4947			NM_002537
209514_s_at	3.07e-07	2.75e-08	6.32669	8.61086	0.831307	RAB27A	RAB27A, member RAS oncogene family	5873
214151_s_at	3.07e-07	2.75e-08	6.32669	8.61084	1.32554	DYX1C1-CCPG1///CCPG1	DYX1C1-CCPG1 readthrough (NMD candidate)///cell cycle progression 1	100533483///9236			AU144243
206448_at	3.07e-07	2.75e-08	6.3266	8.61047	1.3318	ZNF365	zinc finger protein 365	22891			NM_014951
206777_s_at	3.11e-07	2.79e-08	6.32303	8.59652	1.80711	CRYBB2P1///CRYBB2	crystallin beta B2 pseudogene 1///crystallin beta B2	1416///1415			NM_000496
211341_at	3.13e-07	2.8e-08	6.32197	8.59239	2.20908	POU4F1	POU class 4 homeobox 1	5457			L20433
209659_s_at	3.16e-07	2.83e-08	6.31885	8.5802	0.681185	CDC16	cell division cycle 16	8881			AF164598
202939_at	3.18e-07	2.86e-08	6.31692	8.57266	0.517646	ZMPSTE24	zinc metallopeptidase STE24	10269			NM_005857
204597_x_at	3.19e-07	2.87e-08	6.31606	8.56929	1.80871	STC1	stanniocalcin 1	6781			NM_003155
203336_s_at	3.21e-07	2.88e-08	6.31487	8.56463	0.738897	ITGB1BP1	integrin subunit beta 1 binding protein 1	9270			AL548363
202125_s_at	3.22e-07	2.9e-08	6.31348	8.55922	0.95974	TRAK2	trafficking kinesin protein 2	66008			NM_015049
206194_at	3.24e-07	2.92e-08	6.31166	8.55209	0.893704	HOXC4	homeobox C4	3221			AW299598
216483_s_at	3.25e-07	2.92e-08	6.31102	8.54962	0.722131	MYDGF	myeloid derived growth factor	56005
205957_at	3.32e-07	2.99e-08	6.30513	8.52658	1.84837	PLXNB3	plexin B3	5365			NM_005393
209518_at	3.38e-07	3.06e-08	6.29984	8.50592	0.719925	SMARCD1	SWI/SNF related, matrix associated, actin dependent regulator of chromatin, subfamily d, member 1	6602
213179_at	3.41e-07	3.09e-08	6.29749	8.49676	0.590746	CNOT9	CCR4-NOT transcription complex subunit 9	9125			BG289914
201140_s_at	3.42e-07	3.09e-08	6.2972	8.49563	1.41383	RAB5C	RAB5C, member RAS oncogene family	5878			NM_004583
202219_at	3.46e-07	3.14e-08	6.29343	8.4809	1.60112	SLC6A8	solute carrier family 6 member 8	6535			NM_005629
218727_at	3.47e-07	3.15e-08	6.29249	8.47723	0.778616	SLC38A7	solute carrier family 38 member 7	55238			NM_018231
202149_at	3.49e-07	3.16e-08	6.29125	8.4724	1.10381	NEDD9	neural precursor cell expressed, developmentally down-regulated 9	4739
209556_at	3.51e-07	3.19e-08	6.28934	8.46496	0.627502	NCDN	neurochondrin	23154			AB011179
218976_at	3.52e-07	3.19e-08	6.28894	8.4634	1.78691	DNAJC12	DnaJ heat shock protein family (Hsp40) member C12	56521			NM_021800
211270_x_at	3.55e-07	3.23e-08	6.28628	8.45298	0.520728	PTBP1	polypyrimidine tract binding protein 1	5725			BC002397
213773_x_at	3.56e-07	3.24e-08	6.28563	8.45045	0.885156	NSUN5	NOP2/Sun RNA methyltransferase family member 5	55695			AW248552
205099_s_at	3.58e-07	3.25e-08	6.28432	8.44536	1.97938	CCR1	C-C motif chemokine receptor 1	1230			NM_001295
205012_s_at	3.58e-07	3.26e-08	6.28395	8.4439	0.696865	HAGH	hydroxyacylglutathione hydrolase	3029			NM_005326
201255_x_at	3.58e-07	3.26e-08	6.28353	8.44227	0.71344	BAG6	BCL2 associated athanogene 6	7917			NM_004639
209528_s_at	3.62e-07	3.31e-08	6.28005	8.4287	1.14416	TELO2	telomere maintenance 2	9894			AL137394
209959_at	3.64e-07	3.33e-08	6.27861	8.42307	2.39904	NR4A3	nuclear receptor subfamily 4 group A member 3	8013			U12767
212141_at	3.75e-07	3.43e-08	6.2713	8.39453	1.53319	MCM4	minichromosome maintenance complex component 4	4173
213906_at	3.84e-07	3.51e-08	6.26487	8.36947	1.86704	MYBL1	MYB proto-oncogene like 1	4603			AW592266
211968_s_at	3.84e-07	3.52e-08	6.26463	8.36853	0.881716	HSP90AA1	heat shock protein 90 alpha family class A member 1	3320
212167_s_at	3.86e-07	3.53e-08	6.26341	8.36378	0.688533	SMARCB1	SWI/SNF related, matrix associated, actin dependent regulator of chromatin, subfamily b, member 1	6598
209256_s_at	3.89e-07	3.57e-08	6.26114	8.35489	2.39475	KLHDC10	kelch domain containing 10	23008			AF277177
208322_s_at	3.93e-07	3.61e-08	6.25834	8.34399	2.23975	ST3GAL1	ST3 beta-galactoside alpha-2,3-sialyltransferase 1	6482			NM_003033
200923_at	3.96e-07	3.64e-08	6.25623	8.33577	1.16997	LGALS3BP	galectin 3 binding protein	3959			NM_005567
217751_at	4.07e-07	3.76e-08	6.24816	8.30429	0.708011	GSTK1	glutathione S-transferase kappa 1	373156			NM_015917
212273_x_at	4.14e-07	3.82e-08	6.24371	8.28698	0.809129	GNAS	GNAS complex locus	2778
218653_at	4.14e-07	3.83e-08	6.24332	8.28544	0.840525	SLC25A15	solute carrier family 25 member 15	10166			NM_014252
205133_s_at	4.17e-07	3.86e-08	6.24141	8.27799	0.885111	HSPE1	heat shock protein family E (Hsp10) member 1	3336			NM_002157
217918_at	4.22e-07	3.92e-08	6.23769	8.26349	0.691729	DYNLRB1	dynein light chain roadblock-type 1	83658			NM_014183
208918_s_at	4.26e-07	3.95e-08	6.23527	8.25408	0.713187	NADK	NAD kinase	65220			AI334128
221058_s_at	4.34e-07	4.04e-08	6.22973	8.23249	0.59341	CKLF	chemokine like factor	51192			NM_016326
212090_at	4.38e-07	4.08e-08	6.22714	8.22241	1.01435	GRINA	glutamate ionotropic receptor NMDA type subunit associated protein 1	2907			AL571424
203390_s_at	4.39e-07	4.09e-08	6.22693	8.22161	0.601422	KIF3C	kinesin family member 3C	3797			NM_002254
202577_s_at	4.41e-07	4.11e-08	6.22562	8.2165	0.684762	DDX19A	DEAD-box helicase 19A	55308			BC005162
202398_at	4.44e-07	4.15e-08	6.22291	8.20593	1.35239	C15orf38-AP3S2///AP3S2	C15orf38-AP3S2 readthrough///adaptor related protein complex 3 sigma 2 subunit	100526783///10239			BC002785
202424_at	4.46e-07	4.17e-08	6.22195	8.20218	1.14985	MAP2K2	mitogen-activated protein kinase kinase 2	5605			NM_030662
204166_at	4.61e-07	4.32e-08	6.2127	8.16617	1.86855	SBNO2	strawberry notch homolog 2	22904			NM_014963
208657_s_at	4.73e-07	4.45e-08	6.20577	8.13922	1.38537	SEPT9	septin 9	10801			AF142408
204318_s_at	4.8e-07	4.52e-08	6.20165	8.12317	1.42644	GTSE1	G2 and S-phase expressed 1	51512			NM_016426
219522_at	4.82e-07	4.54e-08	6.2003	8.11794	1.71876	FJX1	four jointed box 1	24147			NM_014344
217832_at	4.82e-07	4.55e-08	6.19998	8.11668	0.896262	SYNCRIP	synaptotagmin binding cytoplasmic RNA interacting protein	10492			BE672181
207239_s_at	4.85e-07	4.57e-08	6.19875	8.1119	1.18575	CDK16	cyclin dependent kinase 16	5127			NM_006201
203252_at	4.91e-07	4.64e-08	6.19507	8.09758	0.607689	CDK2AP2	cyclin dependent kinase 2 associated protein 2	10263			NM_005851
209577_at	5.01e-07	4.73e-08	6.18995	8.07766	0.742495	PCYT2	phosphate cytidylyltransferase 2, ethanolamine	5833			BC000351
202120_x_at	5.03e-07	4.76e-08	6.18873	8.07294	0.793134	AP2S1	adaptor related protein complex 2 sigma 1 subunit	1175			NM_004069
221190_s_at	5.16e-07	4.89e-08	6.1819	8.04635	0.607966	C18orf8	chromosome 18 open reading frame 8	29919			NM_013326
203274_at	5.33e-07	5.06e-08	6.17309	8.01213	0.441443	F8A3///F8A2///F8A1	coagulation factor VIII-associated 3///coagulation factor VIII-associated 2///coagulation factor VIII-associated 1	474384///474383///8263			NM_012151
204129_at	5.34e-07	5.08e-08	6.1722	8.00867	0.626877	BCL9	B-cell CLL/lymphoma 9	607			NM_004326
219877_at	5.39e-07	5.13e-08	6.16961	7.99859	0.758007	ZMAT4	zinc finger matrin-type 4	79698			NM_024645
203607_at	5.43e-07	5.17e-08	6.16787	7.99183	1.18492	INPP5F	inositol polyphosphate-5-phosphatase F	22876			NM_014937
205169_at	5.43e-07	5.17e-08	6.1677	7.99116	1.25972	RBBP5	RB binding protein 5, histone lysine methyltransferase complex subunit	5929			NM_005057
200001_at	5.45e-07	5.19e-08	6.16654	7.98666	1.43965	CAPNS1	calpain small subunit 1	826	NA	NA	NM_001749
213790_at	5.5e-07	5.24e-08	6.16431	7.978	1.6001	ADAM12	ADAM metallopeptidase domain 12	8038			W46291
219161_s_at	5.61e-07	5.36e-08	6.15873	7.95634	0.732299	CKLF-CMTM1///CKLF	CKLF-CMTM1 readthrough///chemokine like factor	100529251///51192			NM_016951
220280_s_at	5.61e-07	5.36e-08	6.15863	7.95595	1.66916	ANKMY1	ankyrin repeat and MYND domain containing 1	51281			NM_016552
200831_s_at	5.66e-07	5.42e-08	6.15597	7.9456	1.75321	SCD	stearoyl-CoA desaturase	6319			AA678241
203031_s_at	5.73e-07	5.49e-08	6.15275	7.93312	0.901227	UROS	uroporphyrinogen III synthase	7390			NM_000375
210910_s_at	5.76e-07	5.52e-08	6.15134	7.92763	0.882508	POMZP3	POM121 and ZP3 fusion	22932			BC000487
205034_at	5.83e-07	5.59e-08	6.14788	7.91421	1.21902	CCNE2	cyclin E2	9134
201622_at	5.83e-07	5.59e-08	6.14788	7.91421	0.577258	SND1	staphylococcal nuclease and tudor domain containing 1	27044			NM_014390
202338_at	5.96e-07	5.72e-08	6.14209	7.89172	1.11401	TK1	thymidine kinase 1	7083			NM_003258
215429_s_at	5.96e-07	5.73e-08	6.14178	7.89052	1.96366	ZNF428	zinc finger protein 428	126299
200599_s_at	5.98e-07	5.76e-08	6.14067	7.8862	0.699782	MIR3652///HSP90B1	microRNA 3652///heat shock protein 90 beta family member 1	100500842///7184			NM_003299
219020_at	6.07e-07	5.85e-08	6.13656	7.87026	0.677606	HS1BP3	HCLS1 binding protein 3	64342			NM_022460
210042_s_at	6.2e-07	5.98e-08	6.13102	7.84877	2.03176	CTSZ	cathepsin Z	1522			AF073890
202639_s_at	6.26e-07	6.04e-08	6.12835	7.83841	1.20236	RANBP3	RAN binding protein 3	8498
220825_s_at	6.26e-07	6.05e-08	6.1282	7.83782	1.11787	KIRREL	kin of IRRE like (Drosophila)	55243			NM_018240
204040_at	6.33e-07	6.13e-08	6.12475	7.82444	0.852635	RNF144A	ring finger protein 144A	9781			NM_014746
200738_s_at	6.34e-07	6.14e-08	6.12428	7.82261	0.846942	PGK1	phosphoglycerate kinase 1	5230			NM_000291
209056_s_at	6.35e-07	6.15e-08	6.12387	7.821	0.548338	CDC5L	cell division cycle 5 like	988			NM_001253
217899_at	6.41e-07	6.21e-08	6.12129	7.81103	0.516856	TMEM214	transmembrane protein 214	54867			NM_017727
213668_s_at	6.42e-07	6.22e-08	6.12096	7.80973	1.47518	SOX4	SRY-box 4	6659
202785_at	6.65e-07	6.45e-08	6.11189	7.77456	1.29403	NDUFA7	NADH:ubiquinone oxidoreductase subunit A7	4701			NM_005001
209453_at	6.76e-07	6.58e-08	6.10704	7.75576	1.19335	SLC9A1	solute carrier family 9 member A1	6548			M81768
202998_s_at	6.8e-07	6.62e-08	6.10543	7.7495	1.15887	LOXL2	lysyl oxidase like 2	4017			NM_002318
218318_s_at	6.84e-07	6.66e-08	6.10378	7.74314	0.746358	NLK	nemo like kinase	51701			NM_016231
205756_s_at	6.85e-07	6.68e-08	6.10312	7.74056	0.659426	F8	coagulation factor VIII	2157			NM_000132
204973_at	6.99e-07	6.82e-08	6.09794	7.7205	1.45156	GJB1	gap junction protein beta 1	2705			NM_000166
200617_at	7.01e-07	6.85e-08	6.09686	7.7163	0.887727	MLEC	malectin	9761			NM_014730
219491_at	7.02e-07	6.86e-08	6.09636	7.71436	1.71695	LRFN4	leucine rich repeat and fibronectin type III domain containing 4	78999			NM_024036
203558_at	7.03e-07	6.87e-08	6.09593	7.71271	1.68765	CUL7	cullin 7	9820			NM_014780
201188_s_at	7.09e-07	6.93e-08	6.09391	7.7049	1.5205	ITPR3	inositol 1,4,5-trisphosphate receptor type 3	3710			D26351
214104_at	7.12e-07	6.97e-08	6.09244	7.69919	0.96824	GPR161	G protein-coupled receptor 161	23432
201271_s_at	7.14e-07	6.99e-08	6.09172	7.6964	1.20267	RALY	RALY heterogeneous nuclear ribonucleoprotein	22913			NM_016732
201220_x_at	7.26e-07	7.12e-08	6.08705	7.6783	0.911535	CTBP2	C-terminal binding protein 2	1488			NM_001329
212788_x_at	7.27e-07	7.13e-08	6.08646	7.67603	0.755704	FTL	ferritin light chain	2512			BG537190
214121_x_at	7.49e-07	7.37e-08	6.07829	7.64441	2.08535	PDLIM7	PDZ and LIM domain 7	9260			AA086229
217728_at	7.63e-07	7.51e-08	6.07351	7.62591	1.34353	S100A6	S100 calcium binding protein A6	6277			NM_014624
219655_at	7.65e-07	7.54e-08	6.07243	7.6217	1.38516	SUGCT	succinyl-CoA:glutarate-CoA transferase	79783			NM_024728
205417_s_at	7.76e-07	7.66e-08	6.0686	7.60688	0.636998	DAG1	dystroglycan 1	1605			NM_004393
209081_s_at	7.77e-07	7.67e-08	6.06822	7.60544	1.36416	COL18A1	collagen type XVIII alpha 1 chain	80781			NM_030582
201272_at	7.87e-07	7.78e-08	6.0644	7.59062	0.826085	AKR1B1	aldo-keto reductase family 1 member B	231			NM_001628
213911_s_at	7.9e-07	7.81e-08	6.0634	7.58679	0.693092	H2AFZ	H2A histone family member Z	3015			BF718636
211714_x_at	7.99e-07	7.91e-08	6.06031	7.57481	0.770148	TUBB	tubulin beta class I	203068			BC005838
204766_s_at	8.08e-07	8.01e-08	6.0573	7.56318	1.53363	NUDT1	nudix hydrolase 1	4521			NM_002452
214879_x_at	8.16e-07	8.09e-08	6.05469	7.55307	0.772293	USF2	upstream transcription factor 2, c-fos interacting	7392			AY007087
205376_at	8.19e-07	8.14e-08	6.0532	7.54731	1.11603	INPP4B	inositol polyphosphate-4-phosphatase type II B	8821			NM_003866
204228_at	8.22e-07	8.16e-08	6.05231	7.54386	1.15563	PPIH	peptidylprolyl isomerase H	10465			NM_006347
200708_at	8.36e-07	8.32e-08	6.04749	7.52522	0.627063	GOT2	glutamic-oxaloacetic transaminase 2	2806			NM_002080
219493_at	8.49e-07	8.45e-08	6.04348	7.50975	1.30339	SHCBP1	SHC binding and spindle associated 1	79801			NM_024745
200780_x_at	8.5e-07	8.48e-08	6.04283	7.50724	0.766804	GNAS	GNAS complex locus	2778			NM_000516
215148_s_at	8.55e-07	8.54e-08	6.04107	7.50041	0.638238	APBA3	amyloid beta precursor protein binding family A member 3	9546
217888_s_at	8.68e-07	8.68e-08	6.03696	7.48456	0.743637	ARFGAP1	ADP ribosylation factor GTPase activating protein 1	55738			NM_018209
221908_at	8.72e-07	8.71e-08	6.03581	7.48008	1.75571	RNFT2	ring finger protein, transmembrane 2	84900			AL120375
206630_at	8.75e-07	8.76e-08	6.03442	7.47471	2.12674	TYR	tyrosinase	7299			NM_000372
221753_at	8.78e-07	8.8e-08	6.03327	7.4703	0.757542	SSH1	slingshot protein phosphatase 1	54434
205051_s_at	8.83e-07	8.85e-08	6.03184	7.46475	1.6474	KIT	KIT proto-oncogene receptor tyrosine kinase	3815			NM_000222
204162_at	8.88e-07	8.93e-08	6.02971	7.45652	2.14617	NDC80	NDC80, kinetochore complex component	10403			NM_006101
221504_s_at	8.88e-07	8.94e-08	6.02942	7.45542	0.608193	ATP6V1H	ATPase H+ transporting V1 subunit H	51606			AF112204
213417_at	8.91e-07	8.97e-08	6.02845	7.45165	1.69196	TBX2	T-box 2	6909
207323_s_at	8.96e-07	9.03e-08	6.02691	7.4457	1.31511	MBP	myelin basic protein	4155			NM_002385
208777_s_at	9e-07	9.07e-08	6.02578	7.44136	0.702108	PSMD11	proteasome 26S subunit, non-ATPase 11	5717			AF001212
210691_s_at	9.08e-07	9.17e-08	6.02296	7.43047	0.804128	CACYBP	calcyclin binding protein	27101			AF275803
222239_s_at	9.09e-07	9.18e-08	6.0227	7.42946	0.675491	INTS6	integrator complex subunit 6	26512			AL117626
204372_s_at	9.09e-07	9.19e-08	6.02244	7.42846	0.857692	KHSRP	KH-type splicing regulatory protein	8570			NM_003685
202298_at	9.2e-07	9.3e-08	6.01938	7.41665	0.728602	NDUFA1	NADH:ubiquinone oxidoreductase subunit A1	4694			NM_004541
215983_s_at	9.21e-07	9.32e-08	6.01888	7.4147	0.744544	UBXN8	UBX domain protein 8	7993			D83768
203214_x_at	9.34e-07	9.46e-08	6.01505	7.39993	0.903362	CDK1	cyclin dependent kinase 1	983			NM_001786
203802_x_at	9.48e-07	9.6e-08	6.01125	7.38526	0.821	NSUN5	NOP2/Sun RNA methyltransferase family member 5	55695			NM_018044
203136_at	9.56e-07	9.69e-08	6.0089	7.37618	0.84004	RABAC1	Rab acceptor 1	10567			NM_006423
219061_s_at	9.57e-07	9.71e-08	6.00848	7.37457	0.711237	LAGE3	L antigen family member 3	8270			NM_006014
201598_s_at	9.73e-07	9.87e-08	6.00414	7.35779	0.696696	INPPL1	inositol polyphosphate phosphatase like 1	3636			NM_001567
200964_at	9.76e-07	9.92e-08	6.00306	7.35364	0.648805	UBA1	ubiquitin like modifier activating enzyme 1	7317			NM_003334
218737_at	9.9e-07	1.01e-07	5.99885	7.33741	0.791514	SBNO1	strawberry notch homolog 1	55206			NM_018183
201114_x_at	9.99e-07	1.02e-07	5.99605	7.32658	0.549079	PSMA7	proteasome subunit alpha 7	5688			NM_002792
202159_at	9.99e-07	1.02e-07	5.99602	7.32648	0.606141	FARSA	phenylalanyl-tRNA synthetase alpha subunit	2193			NM_004461
206247_at	1e-06	1.02e-07	5.99554	7.32461	1.09529	MICB	MHC class I polypeptide-related sequence B	4277			NM_005931
203484_at	1e-06	1.02e-07	5.99537	7.32397	0.558012	SEC61G	Sec61 translocon gamma subunit	23480			NM_014302
218145_at	1e-06	1.02e-07	5.99495	7.32236	0.908197	TRIB3	tribbles pseudokinase 3	57761			NM_021158
200770_s_at	1.01e-06	1.03e-07	5.99269	7.31364	0.802083	LAMC1	laminin subunit gamma 1	3915			J03202
215785_s_at	1.02e-06	1.05e-07	5.98961	7.30174	1.55847	CYFIP2	cytoplasmic FMR1 interacting protein 2	26999			AL161999
207836_s_at	1.03e-06	1.05e-07	5.98828	7.29662	0.922483	RBPMS	RNA binding protein with multiple splicing	11030			NM_006867
210208_x_at	1.03e-06	1.06e-07	5.98702	7.29175	0.624447	BAG6	BCL2 associated athanogene 6	7917			BC003133
204954_s_at	1.05e-06	1.08e-07	5.98174	7.27142	1.59334	DYRK1B	dual specificity tyrosine phosphorylation regulated kinase 1B	9149			NM_004714
210940_s_at	1.05e-06	1.08e-07	5.9816	7.27086	1.91947	GRM1	glutamate metabotropic receptor 1	2911			U31216
203805_s_at	1.05e-06	1.08e-07	5.9807	7.2674	1.15097	FANCA	Fanconi anemia complementation group A	2175
218381_s_at	1.06e-06	1.09e-07	5.97862	7.25938	0.550148	U2AF2	U2 small nuclear RNA auxiliary factor 2	11338			NM_007279
200614_at	1.06e-06	1.09e-07	5.97798	7.25694	0.450528	CLTC	clathrin heavy chain	1213			NM_004859
202854_at	1.07e-06	1.1e-07	5.97646	7.25107	0.542315	HPRT1	hypoxanthine phosphoribosyltransferase 1	3251			NM_000194
202828_s_at	1.07e-06	1.11e-07	5.97492	7.24512	1.4229	MMP14	matrix metallopeptidase 14	4323			NM_004995
206503_x_at	1.09e-06	1.13e-07	5.96952	7.22433	2.17826	PML	promyelocytic leukemia	5371			NM_002675
222294_s_at	1.11e-06	1.15e-07	5.96589	7.21034	1.42017	RAB27A	RAB27A, member RAS oncogene family	5873			AW971415
204557_s_at	1.12e-06	1.16e-07	5.96293	7.19896	2.44131	DZIP1	DAZ interacting zinc finger protein 1	22873			NM_014934
201410_at	1.12e-06	1.17e-07	5.96156	7.19368	0.633928	PLEKHB2	pleckstrin homology domain containing B2	55041			AI983043
218336_at	1.14e-06	1.19e-07	5.95769	7.17876	0.566188	PFDN2	prefoldin subunit 2	5202			NM_012394
202284_s_at	1.15e-06	1.2e-07	5.95446	7.16633	0.985326	CDKN1A	cyclin dependent kinase inhibitor 1A	1026			NM_000389
208956_x_at	1.15e-06	1.2e-07	5.95417	7.16521	1.02864	DUT	deoxyuridine triphosphatase	1854			U62891
200807_s_at	1.16e-06	1.21e-07	5.95358	7.16294	0.668908	HSPD1	heat shock protein family D (Hsp60) member 1	3329			NM_002156
202492_at	1.16e-06	1.21e-07	5.9526	7.15919	0.475473	ATG9A	autophagy related 9A	79065			NM_024085
203749_s_at	1.16e-06	1.22e-07	5.95151	7.15497	1.05292	RARA	retinoic acid receptor alpha	5914
203557_s_at	1.19e-06	1.25e-07	5.94429	7.12719	1.33849	PCBD1	pterin-4 alpha-carbinolamine dehydratase 1	5092			NM_000281
52164_at	1.2e-06	1.26e-07	5.94146	7.11631	0.720714	C11orf24	chromosome 11 open reading frame 24	53838			AA065185
221532_s_at	1.21e-06	1.27e-07	5.94101	7.11455	0.785275	WDR61	WD repeat domain 61	80349			AF309553
218355_at	1.23e-06	1.29e-07	5.93623	7.0962	0.793663	KIF4A	kinesin family member 4A	24137			NM_012310
221672_s_at	1.24e-06	1.3e-07	5.93386	7.08705	0.973829	TRAPPC9	trafficking protein particle complex 9	83696			BC003650
203931_s_at	1.24e-06	1.31e-07	5.93177	7.07902	1.02396	MRPL12	mitochondrial ribosomal protein L12	6182			NM_002949
564_at	1.25e-06	1.32e-07	5.92984	7.07161	0.705201	GNA11	G protein subunit alpha 11	2767			M69013
219807_x_at	1.26e-06	1.33e-07	5.9289	7.06797	1.26287	MIA-RAB4B///RAB4B	MIA-RAB4B readthrough (NMD candidate)///RAB4B, member RAS oncogene family	100529262///53916			NM_016154
210187_at	1.26e-06	1.33e-07	5.92842	7.06613	0.90214	LOC101929368///FKBP1A	uncharacterized LOC101929368///FK506 binding protein 1A	101929368///2280			BC005147
217757_at	1.27e-06	1.34e-07	5.92634	7.05813	1.38992	A2M	alpha-2-macroglobulin	2			NM_000014
219099_at	1.27e-06	1.35e-07	5.92539	7.05449	0.888834	TIGAR	TP53 induced glycolysis regulatory phosphatase	57103			NM_020375
217931_at	1.28e-06	1.36e-07	5.92352	7.04729	1.35215	CNPY3	canopy FGF signaling regulator 3	10695			BC004423
204521_at	1.3e-06	1.37e-07	5.92007	7.03403	0.727841	FAM216A	family with sequence similarity 216 member A	29902			NM_013300
201168_x_at	1.3e-06	1.38e-07	5.919	7.02992	1.37543	ARHGDIA	Rho GDP dissociation inhibitor alpha	396			NM_004309
202385_s_at	1.32e-06	1.4e-07	5.9148	7.01378	0.709062	TCOF1	treacle ribosome biogenesis factor 1	6949			NM_000356
214784_x_at	1.34e-06	1.42e-07	5.91118	6.99987	0.439984	XPO6	exportin 6	23214			BE966299
215028_at	1.34e-06	1.43e-07	5.91004	6.9955	1.45353	SEMA6A	semaphorin 6A	57556			AB002438
214743_at	1.35e-06	1.44e-07	5.90841	6.98926	0.662808	CUX1	cut like homeobox 1	1523			BE046521
219707_at	1.36e-06	1.45e-07	5.90714	6.98435	0.731147	CPNE7	copine 7	27132			NM_014427
216038_x_at	1.36e-06	1.45e-07	5.90652	6.98197	0.71389	DAXX	death domain associated protein	1616			BE965715
202758_s_at	1.37e-06	1.46e-07	5.90406	6.97253	0.779577	RFXANK	regulatory factor X associated ankyrin containing protein	8625			NM_003721
204140_at	1.38e-06	1.47e-07	5.90233	6.96589	0.682494	TPST1	tyrosylprotein sulfotransferase 1	8460			NM_003596
203592_s_at	1.4e-06	1.5e-07	5.89743	6.94707	0.891757	FSTL3	follistatin like 3	10272			NM_005860
217913_at	1.4e-06	1.5e-07	5.89716	6.94606	0.652036	VPS4A	vacuolar protein sorting 4 homolog A	27183			NM_013245
215111_s_at	1.41e-06	1.51e-07	5.8967	6.94425	0.837877	TSC22D1	TSC22 domain family member 1	8848
217825_s_at	1.41e-06	1.51e-07	5.89632	6.94282	0.593265	UBE2J1	ubiquitin conjugating enzyme E2 J1	51465			AF151039
204276_at	1.42e-06	1.52e-07	5.89423	6.93478	0.864031	TK2	thymidine kinase 2, mitochondrial	7084			BE895437
213823_at	1.42e-06	1.53e-07	5.89352	6.93206	1.3215	HOXA11	homeobox A11	3207			H94842
202870_s_at	1.42e-06	1.53e-07	5.89308	6.93036	1.35677	CDC20	cell division cycle 20	991			NM_001255
212662_at	1.43e-06	1.54e-07	5.8916	6.92469	0.900805	PVR	poliovirus receptor	5817			BE615277
202618_s_at	1.43e-06	1.54e-07	5.89156	6.92456	0.836652	MECP2	methyl-CpG binding protein 2	4204			L37298
221809_at	1.44e-06	1.55e-07	5.88892	6.91439	1.5275	RANBP10	RAN binding protein 10	57610			AB040897
203228_at	1.47e-06	1.59e-07	5.88384	6.89491	1.65187	PAFAH1B3	platelet activating factor acetylhydrolase 1b catalytic subunit 3	5050			NM_002573
218308_at	1.49e-06	1.61e-07	5.87991	6.87984	1.88956	TACC3	transforming acidic coiled-coil containing protein 3	10460			NM_006342
36475_at	1.52e-06	1.65e-07	5.87412	6.85764	0.702024	GCAT	glycine C-acetyltransferase	23464
202384_s_at	1.54e-06	1.67e-07	5.87063	6.84427	0.837539	TCOF1	treacle ribosome biogenesis factor 1	6949
207622_s_at	1.59e-06	1.72e-07	5.86237	6.81259	1.75786	ABCF2	ATP binding cassette subfamily F member 2	10061			NM_005692
221902_at	1.64e-06	1.78e-07	5.85378	6.77967	1.41128	GPR153	G protein-coupled receptor 153	387509			AL567940
203957_at	1.66e-06	1.81e-07	5.85067	6.76777	0.723519	E2F6	E2F transcription factor 6	1876			NM_198256
218093_s_at	1.69e-06	1.84e-07	5.84593	6.74962	0.879842	ANKRD10	ankyrin repeat domain 10	55608			NM_017664
203313_s_at	1.7e-06	1.85e-07	5.8439	6.74182	0.747909	TGIF1	TGFB induced factor homeobox 1	7050			NM_003244
218309_at	1.74e-06	1.9e-07	5.83752	6.7174	0.939616	CAMK2N1	calcium/calmodulin dependent protein kinase II inhibitor 1	55450			NM_018584
221528_s_at	1.77e-06	1.94e-07	5.83287	6.6996	1.00668	ELMO2	engulfment and cell motility 2	63916			BC000143
215126_at	1.78e-06	1.94e-07	5.83216	6.69689	2.23892	LINC01314	long intergenic non-protein coding RNA 1314	100996492			AL109716
202856_s_at	1.81e-06	1.98e-07	5.82749	6.67905	1.18233	MIR6787///SLC16A3	microRNA 6787///solute carrier family 16 member 3	102465472///9123			NM_004207
37996_s_at	1.81e-06	1.99e-07	5.82635	6.67467	0.685193	DMPK	dystrophia myotonica protein kinase	1760			L08835
212520_s_at	1.82e-06	1.99e-07	5.82599	6.67328	1.07845	SMARCA4	SWI/SNF related, matrix associated, actin dependent regulator of chromatin, subfamily a, member 4	6597
209644_x_at	1.82e-06	1.99e-07	5.82557	6.67169	0.804638	CDKN2A	cyclin dependent kinase inhibitor 2A	1029			U38945
201011_at	1.85e-06	2.04e-07	5.81975	6.64944	0.429946	RPN1	ribophorin I	6184			NM_002950
210135_s_at	1.86e-06	2.04e-07	5.81953	6.64859	1.46037	SHOX2	short stature homeobox 2	6474			AF022654
215688_at	1.89e-06	2.08e-07	5.81492	6.63096	0.833107	RASGRF1	Ras protein specific guanine nucleotide releasing factor 1	5923			AL359931
213951_s_at	1.89e-06	2.08e-07	5.8144	6.62896	1.2184	PSMC3IP	PSMC3 interacting protein	29893			BE964655
204267_x_at	1.9e-06	2.09e-07	5.81318	6.62428	1.03327	PKMYT1	protein kinase, membrane associated tyrosine/threonine 1	9088			NM_004203
204100_at	1.9e-06	2.09e-07	5.81296	6.62348	1.86299	THRA	thyroid hormone receptor, alpha	7067			NM_003250
217982_s_at	1.92e-06	2.12e-07	5.81013	6.61263	0.646803	MORF4L1	mortality factor 4 like 1	10933			NM_006791
218529_at	1.92e-06	2.12e-07	5.80913	6.60882	1.15711	CD320	CD320 molecule	51293			NM_016579
203759_at	1.97e-06	2.18e-07	5.80296	6.58525	1.27324	ST3GAL4	ST3 beta-galactoside alpha-2,3-sialyltransferase 4	6484			NM_006278
204715_at	1.97e-06	2.18e-07	5.8022	6.58235	0.626742	PANX1	pannexin 1	24145			NM_015368
208821_at	1.98e-06	2.19e-07	5.80091	6.57739	0.637889	SNRPB	small nuclear ribonucleoprotein polypeptides B and B1	6628			J04564
204611_s_at	1.99e-06	2.2e-07	5.80005	6.57413	1.1865	PPP2R5B	protein phosphatase 2 regulatory subunit B'beta	5526			NM_006244
201491_at	1.99e-06	2.2e-07	5.79982	6.57323	0.852702	AHSA1	activator of Hsp90 ATPase activity 1	10598			NM_012111
200971_s_at	1.99e-06	2.21e-07	5.79941	6.5717	0.537153	SERP1	stress-associated endoplasmic reticulum protein 1	27230			NM_014445
200021_at	1.99e-06	2.21e-07	5.79869	6.56892	0.621558	CFL1	cofilin 1	1072	NA	NA	NM_005507
218019_s_at	2e-06	2.22e-07	5.79792	6.566	0.805989	PDXK	pyridoxal (pyridoxine, vitamin B6) kinase	8566
203402_at	2.03e-06	2.26e-07	5.79371	6.5499	1.06898	KCNAB2	potassium voltage-gated channel subfamily A regulatory beta subunit 2	8514			AL520102
203846_at	2.03e-06	2.26e-07	5.79275	6.54624	0.50909	TRIM32	tripartite motif containing 32	22954			BC003154
203200_s_at	2.03e-06	2.27e-07	5.79266	6.54591	0.913271	MTRR	5-methyltetrahydrofolate-homocysteine methyltransferase reductase	4552			NM_024010
201266_at	2.04e-06	2.28e-07	5.79159	6.54181	0.650916	TXNRD1	thioredoxin reductase 1	7296			NM_003330
211844_s_at	2.06e-06	2.29e-07	5.78937	6.53333	1.73685	NRP2	neuropilin 2	8828			AF022859
216105_x_at	2.07e-06	2.31e-07	5.78793	6.52782	0.744622	PTPA	protein phosphatase 2 phosphatase activator	5524			X86428
212137_at	2.1e-06	2.35e-07	5.78382	6.51213	0.671817	LARP1	La ribonucleoprotein domain family member 1	23367			AV746402
218153_at	2.13e-06	2.38e-07	5.77961	6.49606	0.801993	CARS2	cysteinyl-tRNA synthetase 2, mitochondrial (putative)	79587			NM_024537
201459_at	2.14e-06	2.39e-07	5.7786	6.49224	0.84195	RUVBL2	RuvB like AAA ATPase 2	10856			NM_006666
215244_at	2.14e-06	2.39e-07	5.77849	6.4918	1.24849	DGCR5	DiGeorge syndrome critical region gene 5 (non-protein coding)	26220			AI479306
218368_s_at	2.14e-06	2.4e-07	5.77795	6.48974	1.33591	TNFRSF12A	TNF receptor superfamily member 12A	51330			NM_016639
214264_s_at	2.15e-06	2.41e-07	5.77736	6.48748	0.731038	EFCAB11	EF-hand calcium binding domain 11	90141
51158_at	2.16e-06	2.42e-07	5.77529	6.47961	1.21315	FAM174B	family with sequence similarity 174 member B	400451			AI801973
210105_s_at	2.16e-06	2.43e-07	5.77516	6.47908	0.839207	FYN	FYN proto-oncogene, Src family tyrosine kinase	2534			M14333
205740_s_at	2.17e-06	2.43e-07	5.77428	6.47574	0.542327	RBM42	RNA binding motif protein 42	79171			NM_024321
219742_at	2.17e-06	2.44e-07	5.77415	6.47524	1.38624	PRR7	proline rich 7 (synaptic)	80758			NM_030567
214170_x_at	2.19e-06	2.47e-07	5.77107	6.46348	0.615349	FH	fumarate hydratase	2271
211725_s_at	2.2e-06	2.47e-07	5.77015	6.45999	0.731347	BID	BH3 interacting domain death agonist	637			BC005884
218586_at	2.23e-06	2.51e-07	5.76685	6.44739	0.63496	MRGBP	MRG/MORF4L binding protein	55257			NM_018270
222033_s_at	2.26e-06	2.54e-07	5.76327	6.43373	1.10242	FLT1	fms related tyrosine kinase 1	2321
209721_s_at	2.29e-06	2.58e-07	5.75966	6.42	0.782233	IFFO1	intermediate filament family orphan 1	25900			BC002857
220116_at	2.31e-06	2.61e-07	5.75672	6.40879	2.3595	KCNN2	potassium calcium-activated channel subfamily N member 2	3781			NM_021614
201441_at	2.33e-06	2.63e-07	5.75462	6.40077	0.762311	COX6B1	cytochrome c oxidase subunit 6B1	1340			NM_001863
211047_x_at	2.33e-06	2.63e-07	5.75456	6.40054	0.937959	AP2S1	adaptor related protein complex 2 sigma 1 subunit	1175			BC006337
212820_at	2.34e-06	2.65e-07	5.75279	6.39382	0.828809	DMXL2	Dmx like 2	23312			AB020663
212116_at	2.35e-06	2.66e-07	5.75161	6.3893	0.514887	TRIM27	tripartite motif containing 27	5987			NM_006510
213842_x_at	2.35e-06	2.66e-07	5.75121	6.38779	0.9582	NSUN5P2///NSUN5P1	NOP2/Sun RNA methyltransferase family member 5 pseudogene 2///NOP2/Sun RNA methyltransferase family member 5 pseudogene 1	260294///155400
214550_s_at	2.36e-06	2.68e-07	5.7498	6.38243	1.36423	TNPO3	transportin 3	23534			AF145029
201095_at	2.37e-06	2.68e-07	5.74955	6.38146	0.935944	DAP	death associated protein	1611			NM_004394
204701_s_at	2.39e-06	2.71e-07	5.74704	6.3719	1.45841	STOML1	stomatin like 1	9399			NM_004809
212898_at	2.39e-06	2.71e-07	5.74667	6.37049	0.934018	TTI1	TELO2 interacting protein 1	9675			AB007866
221056_x_at	2.41e-06	2.74e-07	5.74418	6.361	0.964974	EPS15L1	epidermal growth factor receptor pathway substrate 15 like 1	58513			NM_021235
213485_s_at	2.42e-06	2.75e-07	5.74324	6.35741	0.680073	ABCC10	ATP binding cassette subfamily C member 10	89845			AK000002
219862_s_at	2.43e-06	2.77e-07	5.74126	6.34989	0.914415	NARF	nuclear prelamin A recognition factor	26502			NM_012336
200612_s_at	2.43e-06	2.77e-07	5.74099	6.34885	1.44	AP2B1	adaptor related protein complex 2 beta 1 subunit	163			NM_001282
209407_s_at	2.46e-06	2.8e-07	5.73829	6.33856	1.41319	DEAF1	DEAF1, transcription factor	10522			AF068892
202152_x_at	2.47e-06	2.82e-07	5.73676	6.33275	0.842186	USF2	upstream transcription factor 2, c-fos interacting	7392			NM_003367
201614_s_at	2.51e-06	2.86e-07	5.7326	6.31691	1.3256	RUVBL1	RuvB like AAA ATPase 1	8607			NM_003707
214430_at	2.52e-06	2.87e-07	5.73207	6.31487	0.559848	GLA	galactosidase alpha	2717			NM_000169
208044_s_at	2.55e-06	2.91e-07	5.72875	6.30225	0.914867	PPARD	peroxisome proliferator activated receptor delta	5467			NM_006238
208443_x_at	2.6e-06	2.98e-07	5.72279	6.27957	1.382	SHOX2	short stature homeobox 2	6474			NM_006884
205117_at	2.63e-06	3e-07	5.72038	6.2704	2.25404	FGF1	fibroblast growth factor 1	2246			X59065
210125_s_at	2.65e-06	3.03e-07	5.71788	6.26091	0.870661	BANF1	barrier to autointegration factor 1	8815			AF044773
201350_at	2.69e-06	3.08e-07	5.71385	6.24556	0.781404	FLOT2	flotillin 2	2319			NM_004475
1487_at	2.73e-06	3.13e-07	5.70951	6.22909	0.586311	ESRRA	estrogen related receptor alpha	2101	NA	NA	L38487
205453_at	2.74e-06	3.14e-07	5.70889	6.2267	1.92682	HOXB2	homeobox B2	3212			NM_002145
211451_s_at	2.74e-06	3.14e-07	5.70863	6.22572	1.67286	KCNJ4	potassium voltage-gated channel subfamily J member 4	3761			U24056
203235_at	2.74e-06	3.15e-07	5.70829	6.22442	0.832757	THOP1	thimet oligopeptidase 1	7064			NM_003249
204966_at	2.77e-06	3.18e-07	5.70569	6.21456	1.09868	ADGRB2	adhesion G protein-coupled receptor B2	576
201378_s_at	2.78e-06	3.2e-07	5.70449	6.20997	0.77395	UBAP2L	ubiquitin associated protein 2 like	9898			NM_014847
221284_s_at	2.78e-06	3.2e-07	5.70413	6.20864	1.49524	SRC	SRC proto-oncogene, non-receptor tyrosine kinase	6714			NM_005417
208919_s_at	2.78e-06	3.2e-07	5.70385	6.20754	0.591857	NADK	NAD kinase	65220			BC001709
219096_at	2.79e-06	3.22e-07	5.70284	6.2037	0.731252	ARMC7	armadillo repeat containing 7	79637			NM_024585
201377_at	2.81e-06	3.24e-07	5.70074	6.19574	0.681732	UBAP2L	ubiquitin associated protein 2 like	9898			NM_014847
213845_at	2.82e-06	3.25e-07	5.70007	6.19319	2.00017	GRIK2	glutamate ionotropic receptor kainate type subunit 2	2898
218511_s_at	2.84e-06	3.27e-07	5.69823	6.18621	0.785911	PNPO	pyridoxamine 5'-phosphate oxidase	55163			NM_018129
221381_s_at	2.89e-06	3.34e-07	5.69302	6.1664	1.04431	MORF4L1	mortality factor 4 like 1	10933
212318_at	2.91e-06	3.36e-07	5.69173	6.16152	0.660696	TNPO3	transportin 3	23534			NM_012470
210835_s_at	2.92e-06	3.38e-07	5.69031	6.1561	0.900311	CTBP2	C-terminal binding protein 2	1488			AF222711
218061_at	2.92e-06	3.38e-07	5.6903	6.15606	0.615753	MEA1	male-enhanced antigen 1	4201			NM_014623
219471_at	2.93e-06	3.39e-07	5.68928	6.15221	1.4844	KIAA0226L	KIAA0226 like	80183			NM_025113
218984_at	2.93e-06	3.4e-07	5.6888	6.15038	0.597782	PUS7	pseudouridylate synthase 7 (putative)	54517			NM_019042
220157_x_at	2.93e-06	3.4e-07	5.68862	6.14971	0.991395	PLEKHA8P1	pleckstrin homology domain containing A8 pseudogene 1	51054
215089_s_at	2.94e-06	3.41e-07	5.68784	6.14672	0.828306	RBM10	RNA binding motif protein 10	8241			AW409974
204068_at	2.96e-06	3.44e-07	5.68588	6.13929	0.939335	STK3	serine/threonine kinase 3	6788			NM_006281
209044_x_at	2.96e-06	3.44e-07	5.68578	6.13892	0.511348	SF3B4	splicing factor 3b subunit 4	10262			BC004273
200666_s_at	2.96e-06	3.44e-07	5.68556	6.13809	0.829042	DNAJB1	DnaJ heat shock protein family (Hsp40) member B1	3337			NM_006145
220097_s_at	2.99e-06	3.47e-07	5.68298	6.12829	1.04171	TMEM104	transmembrane protein 104	54868			NM_017728
217935_s_at	3e-06	3.49e-07	5.68167	6.12332	0.686903	UQCC1	ubiquinol-cytochrome c reductase complex assembly factor 1	55245			NM_018244
204034_at	3.01e-06	3.5e-07	5.6811	6.12116	0.785472	ETHE1	ETHE1, persulfide dioxygenase	23474			NM_014297
206499_s_at	3.08e-06	3.58e-07	5.67518	6.09867	0.818581	RCC1	regulator of chromosome condensation 1	1104			NM_001269
203003_at	3.1e-06	3.61e-07	5.67285	6.08985	1.16815	MEF2D	myocyte enhancer factor 2D	4209			AL530331
204947_at	3.12e-06	3.64e-07	5.67091	6.08248	1.28145	E2F1	E2F transcription factor 1	1869			NM_005225
200075_s_at	3.14e-06	3.66e-07	5.66944	6.07689	1.10973	GUK1	guanylate kinase 1	2987	NA	NA	BC006249
208478_s_at	3.14e-06	3.67e-07	5.6689	6.07488	1.32668	BAX	BCL2 associated X, apoptosis regulator	581			NM_004324
205512_s_at	3.14e-06	3.67e-07	5.66878	6.07439	0.526813	AIFM1	apoptosis inducing factor, mitochondria associated 1	9131			NM_004208
203466_at	3.14e-06	3.67e-07	5.66872	6.07418	1.06716	MPV17	MPV17, mitochondrial inner membrane protein	4358			NM_002437
218829_s_at	3.31e-06	3.87e-07	5.65536	6.02352	0.681501	CHD7	chromodomain helicase DNA binding protein 7	55636			NM_017780
221783_at	3.34e-06	3.91e-07	5.65257	6.01294	0.843898	WIZ	widely interspaced zinc finger motifs	58525			W67467
212607_at	3.39e-06	3.97e-07	5.64878	5.99861	0.797069	AKT3	AKT serine/threonine kinase 3	10000			N32526
209852_x_at	3.42e-06	4.01e-07	5.64633	5.98929	0.520015	PSME3	proteasome activator subunit 3	10197			BC001423
211065_x_at	3.43e-06	4.02e-07	5.64549	5.98612	0.702273	PFKL	phosphofructokinase, liver type	5211			BC006422
202102_s_at	3.46e-06	4.07e-07	5.6425	5.97481	0.820642	BRD4	bromodomain containing 4	23476			BF718610
217943_s_at	3.47e-06	4.08e-07	5.64158	5.9713	0.919252	MAP7D1	MAP7 domain containing 1	55700			NM_018067
209224_s_at	3.53e-06	4.15e-07	5.63716	5.95457	0.565729	NDUFA2	NADH:ubiquinone oxidoreductase subunit A2	4695			BC003674
201340_s_at	3.53e-06	4.16e-07	5.63694	5.95376	1.65055	ENC1	ectodermal-neural cortex 1	8507			AF010314
208815_x_at	3.61e-06	4.26e-07	5.63066	5.92997	0.700125	HSPA4	heat shock protein family A (Hsp70) member 4	3308			AB023420
211519_s_at	3.62e-06	4.26e-07	5.63023	5.92834	0.558159	KIF2C	kinesin family member 2C	11004			AY026505
32042_at	3.63e-06	4.28e-07	5.62913	5.92421	0.794053	ENOX2	ecto-NOX disulfide-thiol exchanger 2	10495			S72904
218452_at	3.67e-06	4.33e-07	5.62623	5.9132	1.29409	SMARCAL1	SWI/SNF related, matrix associated, actin dependent regulator of chromatin, subfamily a like 1	50485			NM_014140
218247_s_at	3.7e-06	4.37e-07	5.62394	5.90454	1.09613	MEX3C	mex-3 RNA binding family member C	51320			NM_016626
219188_s_at	3.74e-06	4.42e-07	5.62107	5.89372	1.42649	MACROD1	MACRO domain containing 1	28992			NM_014067
201615_x_at	3.75e-06	4.44e-07	5.61992	5.88934	1.35505	CALD1	caldesmon 1	800
212825_at	3.76e-06	4.45e-07	5.61946	5.88759	0.498471	PAXIP1	PAX interacting protein 1	22976
204077_x_at	3.77e-06	4.47e-07	5.61835	5.88342	0.919562	ENTPD4	ectonucleoside triphosphate diphosphohydrolase 4	9583			NM_004901
221437_s_at	3.89e-06	4.61e-07	5.61022	5.85266	1.20636	MRPS15	mitochondrial ribosomal protein S15	64960			NM_031280
213175_s_at	3.92e-06	4.66e-07	5.60749	5.84237	1.04408	SNRPB	small nuclear ribonucleoprotein polypeptides B and B1	6628
219709_x_at	3.99e-06	4.74e-07	5.60298	5.82529	1.03694	FAM173A	family with sequence similarity 173 member A	65990			NM_023933
205452_at	3.99e-06	4.75e-07	5.60223	5.82249	0.854336	PIGB	phosphatidylinositol glycan anchor biosynthesis class B	9488			NM_004855
209511_at	3.99e-06	4.75e-07	5.60218	5.8223	0.717958	POLR2F	RNA polymerase II subunit F	5435			BC003582
212212_s_at	4.02e-06	4.78e-07	5.60055	5.81613	0.933349	INTS1	integrator complex subunit 1	26173
204266_s_at	4.1e-06	4.89e-07	5.59484	5.79458	0.79736	CHKA	choline kinase alpha	1119			NM_001277
201453_x_at	4.11e-06	4.9e-07	5.59415	5.79196	0.536258	RHEB	Ras homolog enriched in brain	6009			NM_005614
218624_s_at	4.12e-06	4.92e-07	5.59343	5.78923	0.921302	CENPBD1P1	CENPB DNA-binding domains containing 1 pseudogene 1	65996
202140_s_at	4.13e-06	4.93e-07	5.59278	5.78678	0.626002	CLK3	CDC like kinase 3	1198			NM_003992
213217_at	4.13e-06	4.93e-07	5.59272	5.78657	2.72237	ADCY2	adenylate cyclase 2	108			AU149572
212782_x_at	4.13e-06	4.94e-07	5.59224	5.78474	1.24056	POLR2J	RNA polymerase II subunit J	5439			BG335629
202275_at	4.15e-06	4.96e-07	5.59103	5.78017	0.718269	G6PD	glucose-6-phosphate dehydrogenase	2539			NM_000402
212664_at	4.24e-06	5.08e-07	5.58524	5.75833	1.3161	TUBB4A	tubulin beta 4A class IVa	10382			AL567012
207214_at	4.24e-06	5.08e-07	5.58515	5.75799	1.00454	SPINK4	serine peptidase inhibitor, Kazal type 4	27290			NM_014471
212175_s_at	4.26e-06	5.1e-07	5.58385	5.75309	0.554827	AK2	adenylate kinase 2	204			AL513611
210692_s_at	4.31e-06	5.17e-07	5.58056	5.74067	1.33602	SLC43A3	solute carrier family 43 member 3	29015			BC003163
41220_at	4.37e-06	5.25e-07	5.57643	5.72506	0.621588	SEPT9	septin 9	10801			AB023208
205980_s_at	4.39e-06	5.28e-07	5.57523	5.72054	3.27083	PRR5-ARHGAP8///ARHGAP8	PRR5-ARHGAP8 readthrough///Rho GTPase activating protein 8	553158///23779			NM_015366
218773_s_at	4.43e-06	5.33e-07	5.5729	5.71175	1.00151	MSRB2	methionine sulfoxide reductase B2	22921			NM_012228
200653_s_at	4.52e-06	5.44e-07	5.56719	5.69021	0.740144	CALM3///CALM2///CALM1	calmodulin 3///calmodulin 2///calmodulin 1	808///805///801			M27319
213647_at	4.54e-06	5.47e-07	5.5658	5.685	1.08007	DNA2	DNA replication helicase/nuclease 2	1763			D42046
222022_at	4.57e-06	5.52e-07	5.56381	5.6775	0.978015	DTX3	deltex E3 ubiquitin ligase 3	196403			AW574818
209506_s_at	4.64e-06	5.6e-07	5.55986	5.66262	0.768254	NR2F2///NR2F1	nuclear receptor subfamily 2 group F member 2///nuclear receptor subfamily 2 group F member 1	7026///7025			BC004154
209283_at	4.66e-06	5.63e-07	5.55859	5.65783	1.89251	CRYAB	crystallin alpha B	1410			AF007162
204214_s_at	4.66e-06	5.63e-07	5.55842	5.65717	0.724308	RAB32	RAB32, member RAS oncogene family	10981			NM_006834
221601_s_at	4.69e-06	5.67e-07	5.55662	5.65041	1.39514	FCMR	Fc fragment of IgM receptor	9214			AI084226
209994_s_at	4.74e-06	5.74e-07	5.55343	5.63838	1.86368	ABCB4///ABCB1	ATP binding cassette subfamily B member 4///ATP binding cassette subfamily B member 1	5244///5243			AF016535
217754_at	4.77e-06	5.78e-07	5.55151	5.63115	0.483625	DDX56	DEAD-box helicase 56	54606			NM_019082
217124_at	4.78e-06	5.79e-07	5.55133	5.63045	0.893401	IQCE	IQ motif containing E	23288			AL136792
207165_at	4.8e-06	5.82e-07	5.54978	5.62464	1.22641	HMMR	hyaluronan mediated motility receptor	3161			NM_012485
222113_s_at	4.8e-06	5.82e-07	5.54975	5.62451	0.626053	EPS15L1	epidermal growth factor receptor pathway substrate 15 like 1	58513			AV710549
210198_s_at	4.87e-06	5.91e-07	5.5458	5.60963	1.29649	PLP1	proteolipid protein 1	5354			BC002665
200846_s_at	4.87e-06	5.92e-07	5.54558	5.60882	1.00777	PPP1CA	protein phosphatase 1 catalytic subunit alpha	5499			NM_002708
204822_at	4.91e-06	5.98e-07	5.54292	5.59881	1.51521	TTK	TTK protein kinase	7272			NM_003318
214531_s_at	4.95e-06	6.03e-07	5.54091	5.59122	1.3172	SNX1	sorting nexin 1	6642			AF065484
220239_at	4.98e-06	6.07e-07	5.53893	5.58379	0.807851	KLHL7	kelch like family member 7	55975			NM_018846
201555_at	4.99e-06	6.08e-07	5.53865	5.58274	0.518043	MCM3	minichromosome maintenance complex component 3	4172			NM_002388
214061_at	4.99e-06	6.08e-07	5.53842	5.58185	1.09002	TBC1D31	TBC1 domain family member 31	93594			AI017564
210443_x_at	5.04e-06	6.15e-07	5.53582	5.57208	0.75908	OGFR	opioid growth factor receptor	11054			AF172452
218592_s_at	5.06e-06	6.17e-07	5.53457	5.56738	0.593301	CECR5	cat eye syndrome chromosome region, candidate 5	27440			NM_017829
204986_s_at	5.09e-06	6.22e-07	5.53252	5.55967	0.629248	TAOK2	TAO kinase 2	9344			NM_016151
202059_s_at	5.13e-06	6.28e-07	5.5303	5.55131	0.600766	KPNA1	karyopherin subunit alpha 1	3836			NM_002264
203570_at	5.17e-06	6.33e-07	5.52823	5.54355	2.31596	LOXL1	lysyl oxidase like 1	4016			NM_005576
208674_x_at	5.19e-06	6.35e-07	5.52723	5.53975	0.54737	DDOST	dolichyl-diphosphooligosaccharide--protein glycosyltransferase non-catalytic subunit	1650			BC002594
221005_s_at	5.2e-06	6.37e-07	5.52669	5.53773	1.09956	PTDSS2	phosphatidylserine synthase 2	81490			NM_030783
222088_s_at	5.25e-06	6.43e-07	5.52391	5.5273	1.08228	SLC2A14///SLC2A3	solute carrier family 2 member 14///solute carrier family 2 member 3	144195///6515
204257_at	5.33e-06	6.53e-07	5.51988	5.51214	0.881693	FADS3	fatty acid desaturase 3	3995			NM_021727
201052_s_at	5.43e-06	6.68e-07	5.5141	5.4904	0.610892	PSMF1	proteasome inhibitor subunit 1	9491			BG029917
219039_at	5.46e-06	6.72e-07	5.5125	5.48439	1.24729	SEMA4C	semaphorin 4C	54910			NM_017789
213327_s_at	5.51e-06	6.78e-07	5.51016	5.47562	0.628777	USP12	ubiquitin specific peptidase 12	219333
218052_s_at	5.51e-06	6.8e-07	5.50955	5.4733	0.490064	ATP13A1	ATPase 13A1	57130			NM_020410
200968_s_at	5.74e-06	7.09e-07	5.49871	5.43262	1.5975	PPIB	peptidylprolyl isomerase B	5479			NM_000942
218969_at	5.75e-06	7.1e-07	5.49834	5.43121	0.642308	PAM16	presequence translocase associated motor 16 homolog	51025			NM_016069
222116_s_at	5.76e-06	7.12e-07	5.49772	5.4289	1.15304	TBC1D16	TBC1 domain family member 16	125058			AL157485
204641_at	5.82e-06	7.19e-07	5.49516	5.41928	1.9025	NEK2	NIMA related kinase 2	4751			NM_002497
202782_s_at	5.84e-06	7.22e-07	5.49388	5.41449	0.700397	INPP5K	inositol polyphosphate-5-phosphatase K	51763			NM_016532
209501_at	5.88e-06	7.28e-07	5.49171	5.40633	1.03487	LOC101060399///CDR2	cerebellar degeneration-related protein 2///cerebellar degeneration related protein 2	101060399///1039			AL582414
202142_at	5.93e-06	7.35e-07	5.48947	5.39793	0.743537	COPS8	COP9 signalosome subunit 8	10920			BC003090
201157_s_at	5.95e-06	7.38e-07	5.48834	5.39367	0.442418	NMT1	N-myristoyltransferase 1	4836			AF020500
220587_s_at	5.98e-06	7.42e-07	5.48682	5.388	1.05653	MLST8	MTOR associated protein, LST8 homolog	64223			NM_022372
211177_s_at	6.02e-06	7.48e-07	5.48498	5.38108	0.96675	TXNRD2	thioredoxin reductase 2	10587			AB019695
209433_s_at	6.03e-06	7.5e-07	5.48418	5.37809	0.619619	PPAT	phosphoribosyl pyrophosphate amidotransferase	5471
203974_at	6.03e-06	7.5e-07	5.48406	5.37765	0.721961	PUDP	pseudouridine 5'-phosphatase	8226			NM_012080
219027_s_at	6.13e-06	7.64e-07	5.47936	5.36001	0.821808	MYO9A	myosin IXA	4649			NM_006901
203692_s_at	6.17e-06	7.7e-07	5.47732	5.35235	0.61279	E2F3	E2F transcription factor 3	1871			AI640363
204698_at	6.21e-06	7.75e-07	5.47558	5.34583	2.44574	ISG20	interferon stimulated exonuclease gene 20	3669			NM_002201
201113_at	6.21e-06	7.75e-07	5.47555	5.34573	0.930832	TUFM	Tu translation elongation factor, mitochondrial	7284			NM_003321
202290_at	6.24e-06	7.8e-07	5.47387	5.33943	1.76272	PDAP1	PDGFA associated protein 1	11333			NM_014891
64900_at	6.25e-06	7.81e-07	5.47366	5.33866	0.918052	TMEM231	transmembrane protein 231	79583			AA401703
219501_at	6.26e-06	7.82e-07	5.47321	5.33697	1.1258	ENOX1	ecto-NOX disulfide-thiol exchanger 1	55068			NM_017993
221587_s_at	6.27e-06	7.84e-07	5.47262	5.33477	0.580835	C19orf24	chromosome 19 open reading frame 24	55009			BC000890
221758_at	6.29e-06	7.87e-07	5.47174	5.33146	0.566376	ARMC6	armadillo repeat containing 6	93436			BC003700
214017_s_at	6.33e-06	7.92e-07	5.47006	5.32515	1.0946	DHX34	DEAH-box helicase 34	9704			AA039439
219182_at	6.34e-06	7.93e-07	5.46951	5.32308	0.576629	TMEM231	transmembrane protein 231	79583			NM_024533
211936_at	6.42e-06	8.04e-07	5.46621	5.31074	0.746753	HSPA5	heat shock protein family A (Hsp70) member 5	3309			AF216292
218070_s_at	6.43e-06	8.06e-07	5.46545	5.30789	0.502878	GMPPA	GDP-mannose pyrophosphorylase A	29926			NM_013335
203201_at	6.45e-06	8.09e-07	5.46435	5.30377	0.814086	PMM2	phosphomannomutase 2	5373			NM_000303
209410_s_at	6.45e-06	8.09e-07	5.46434	5.30374	0.657779	GRB10	growth factor receptor bound protein 10	2887			AF000017
211143_x_at	6.46e-06	8.1e-07	5.46399	5.30241	1.30744	NR4A1	nuclear receptor subfamily 4 group A member 1	3164			D49728
218066_at	6.55e-06	8.23e-07	5.46006	5.28771	0.736482	SLC12A7	solute carrier family 12 member 7	10723			NM_006598
203132_at	6.57e-06	8.27e-07	5.45874	5.28277	1.04775	RB1	RB transcriptional corepressor 1	5925			NM_000321
208499_s_at	6.71e-06	8.45e-07	5.45312	5.26173	1.38489	DNAJC3	DnaJ heat shock protein family (Hsp40) member C3	5611			NM_006260
217917_s_at	6.75e-06	8.51e-07	5.45133	5.25502	0.604479	DYNLRB1	dynein light chain roadblock-type 1	83658			NM_014183
44111_at	6.76e-06	8.53e-07	5.45062	5.25235	0.701581	VPS33B	VPS33B, late endosome and lysosome associated	26276
209446_s_at	6.76e-06	8.54e-07	5.45035	5.25136	1.00971						BC001743
207610_s_at	6.8e-06	8.59e-07	5.44896	5.24615	1.04245	ADGRE2	adhesion G protein-coupled receptor E2	30817			NM_013447
217678_at	6.91e-06	8.74e-07	5.4444	5.22908	1.22509	SLC7A11	solute carrier family 7 member 11	23657
220189_s_at	6.91e-06	8.74e-07	5.44424	5.22848	1.01621	MGAT4B	mannosyl (alpha-1,3-)-glycoprotein beta-1,4-N-acetylglucosaminyltransferase, isozyme B	11282			NM_014275
40562_at	6.92e-06	8.75e-07	5.44388	5.22715	0.8386	GNA11	G protein subunit alpha 11	2767
218160_at	7.02e-06	8.89e-07	5.43999	5.21258	0.554137	NDUFA8	NADH:ubiquinone oxidoreductase subunit A8	4702			NM_014222
202561_at	7.03e-06	8.91e-07	5.43935	5.21022	0.721884	TNKS	tankyrase	8658			AF070613
217650_x_at	7.03e-06	8.91e-07	5.43932	5.2101	0.991579	ST3GAL2	ST3 beta-galactoside alpha-2,3-sialyltransferase 2	6483
2028_s_at	7.04e-06	8.92e-07	5.43888	5.20845	0.605392	E2F1	E2F transcription factor 1	1869			M96577
211014_s_at	7.04e-06	8.94e-07	5.43841	5.2067	0.673643	PML	promyelocytic leukemia	5371			AF230410
203062_s_at	7.07e-06	8.97e-07	5.43742	5.20299	0.514196	MDC1	mediator of DNA damage checkpoint 1	9656			NM_014641
219703_at	7.13e-06	9.07e-07	5.43456	5.1923	1.1383	MNS1	meiosis specific nuclear structural 1	55329			NM_018365
203947_at	7.16e-06	9.12e-07	5.43337	5.18785	0.491488	CSTF3	cleavage stimulation factor subunit 3	1479			NM_001326
211743_s_at	7.25e-06	9.24e-07	5.42991	5.1749	1.39312	PRG2	proteoglycan 2, pro eosinophil major basic protein	5553			BC005929
217416_x_at	7.28e-06	9.29e-07	5.42829	5.16887	1.30769
201616_s_at	7.28e-06	9.3e-07	5.42823	5.16864	1.58538	CALD1	caldesmon 1	800			AL577531
217346_at	7.29e-06	9.31e-07	5.42782	5.16709	0.635953
218443_s_at	7.31e-06	9.33e-07	5.42722	5.16485	0.552561	DAZAP1	DAZ associated protein 1	26528			NM_018959
218034_at	7.34e-06	9.38e-07	5.42582	5.15963	1.04062	FIS1	fission, mitochondrial 1	51024			NM_016068
208616_s_at	7.38e-06	9.43e-07	5.42463	5.1552	0.462499	PTP4A2	protein tyrosine phosphatase type IVA, member 2	8073			U48297
201879_at	7.4e-06	9.47e-07	5.42343	5.1507	0.969774	ARIH1	ariadne RBR E3 ubiquitin protein ligase 1	25820			AI694332
64371_at	7.42e-06	9.49e-07	5.42279	5.14831	0.75618	SUGP2	SURP and G-patch domain containing 2	10147
215081_at	7.44e-06	9.52e-07	5.42215	5.14594	1.91026	KIAA1024	KIAA1024	23251			AF035294
201043_s_at	7.46e-06	9.56e-07	5.42109	5.14196	1.63199	ANP32A	acidic nuclear phosphoprotein 32 family member A	8125			NM_006305
205546_s_at	7.5e-06	9.6e-07	5.41984	5.13731	0.645897	TYK2	tyrosine kinase 2	7297			NM_003331
202326_at	7.5e-06	9.61e-07	5.41961	5.13643	0.997019	EHMT2	euchromatic histone lysine methyltransferase 2	10919			NM_006709
205097_at	7.62e-06	9.77e-07	5.41534	5.12049	1.28159	SLC26A2	solute carrier family 26 member 2	1836			AI025519
203370_s_at	7.7e-06	9.88e-07	5.41224	5.10892	0.967308	PDLIM7	PDZ and LIM domain 7	9260			NM_005451
221069_s_at	7.76e-06	9.97e-07	5.4099	5.1002	0.428641	TACO1	translational activator of cytochrome c oxidase I	51204			NM_016360
204306_s_at	7.81e-06	1e-06	5.40816	5.09369	1.07095	CD151	CD151 molecule (Raph blood group)	977			NM_004357
160020_at	7.81e-06	1.01e-06	5.40788	5.09264	0.634968	MMP14	matrix metallopeptidase 14	4323	NA	NA	Z48481
201438_at	7.86e-06	1.01e-06	5.40621	5.0864	1.15609	COL6A3	collagen type VI alpha 3 chain	1293			NM_004369
219725_at	7.9e-06	1.02e-06	5.40443	5.07979	2.20538	TREM2	triggering receptor expressed on myeloid cells 2	54209			NM_018965
204497_at	7.92e-06	1.02e-06	5.40378	5.07736	1.01948	ADCY9	adenylate cyclase 9	115			AB011092
202024_at	7.97e-06	1.03e-06	5.40195	5.07054	0.764375	ASNA1	arsA arsenite transporter, ATP-binding, homolog 1 (bacterial)	439			NM_004317
214152_at	7.98e-06	1.03e-06	5.40145	5.06865	0.919183	DYX1C1-CCPG1///CCPG1	DYX1C1-CCPG1 readthrough (NMD candidate)///cell cycle progression 1	100533483///9236			AU144243
218056_at	8e-06	1.03e-06	5.40093	5.06674	0.66075	BFAR	bifunctional apoptosis regulator	51283			NM_016561
219539_at	8.11e-06	1.05e-06	5.39707	5.05234	0.923103	GEMIN6	gem nuclear organelle associated protein 6	79833			NM_024775
201771_at	8.19e-06	1.06e-06	5.3944	5.04236	0.664051	SCAMP3	secretory carrier membrane protein 3	10067			NM_005698
209635_at	8.23e-06	1.06e-06	5.39283	5.0365	0.888802	AP1S1	adaptor related protein complex 1 sigma 1 subunit	1174			BC003561
203891_s_at	8.28e-06	1.07e-06	5.39111	5.03012	1.03848	MIR637///DAPK3	microRNA 637///death associated protein kinase 3	693222///1613			NM_001348
204595_s_at	8.32e-06	1.08e-06	5.38996	5.02582	1.03122	STC1	stanniocalcin 1	6781			AI300520
218211_s_at	8.38e-06	1.09e-06	5.38775	5.01758	1.21255	MLPH	melanophilin	79083			NM_024101
210396_s_at	8.43e-06	1.09e-06	5.38616	5.01165	0.944872	SMG1P5///BOLA2///SMG1P2	SMG1P5, nonsense mediated mRNA decay associated PI3K related kinase pseudogene 5///bolA family member 2///SMG1P2, nonsense mediated mRNA decay associated PI3K related kinase pseudogene 2	595101///552900///440354			AF271775
211630_s_at	8.43e-06	1.09e-06	5.38612	5.01149	0.446173	GSS	glutathione synthetase	2937			L42531
200935_at	8.45e-06	1.1e-06	5.38511	5.00775	1.69229	CALR	calreticulin	811			NM_004343
203199_s_at	8.54e-06	1.11e-06	5.38247	4.99791	0.827385	MTRR	5-methyltetrahydrofolate-homocysteine methyltransferase reductase	4552			N29717
37152_at	8.56e-06	1.11e-06	5.3816	4.99468	1.10924	PPARD	peroxisome proliferator activated receptor delta	5467			L07592
221168_at	8.56e-06	1.11e-06	5.38155	4.99448	1.51042	PRDM13	PR/SET domain 13	59336			NM_021620
52005_at	8.59e-06	1.12e-06	5.38058	4.99086	0.57834	WIZ	widely interspaced zinc finger motifs	58525
209246_at	8.59e-06	1.12e-06	5.38055	4.99075	1.81313	ABCF2	ATP binding cassette subfamily F member 2	10061			AF261091
203219_s_at	8.73e-06	1.14e-06	5.37597	4.97372	0.643563	APRT	adenine phosphoribosyltransferase	353			NM_000485
204825_at	8.76e-06	1.14e-06	5.37497	4.96999	0.933746	MELK	maternal embryonic leucine zipper kinase	9833			NM_014791
206364_at	8.76e-06	1.14e-06	5.37476	4.9692	0.937767	KIF14	kinesin family member 14	9928			NM_014875
208809_s_at	8.8e-06	1.15e-06	5.37356	4.96472	0.643961	C6orf62	chromosome 6 open reading frame 62	81688			AL136632
219639_x_at	8.8e-06	1.15e-06	5.37352	4.96458	0.688385	PARP6	poly(ADP-ribose) polymerase family member 6	56965
212618_at	8.85e-06	1.15e-06	5.372	4.95891	0.902044	ZNF609	zinc finger protein 609	23060
46665_at	8.87e-06	1.16e-06	5.37133	4.95645	1.41878	SEMA4C	semaphorin 4C	54910
210943_s_at	8.92e-06	1.16e-06	5.36964	4.95014	0.849256	LYST	lysosomal trafficking regulator	1130			U84744
207714_s_at	9.06e-06	1.18e-06	5.36503	4.93298	2.04245	SERPINH1	serpin family H member 1	871			NM_001235
208689_s_at	9.18e-06	1.2e-06	5.36139	4.91943	0.891565	RPN2	ribophorin II	6185			BC003560
216942_s_at	9.2e-06	1.2e-06	5.3606	4.91651	0.83118	CD58	CD58 molecule	965			D28586
213670_x_at	9.22e-06	1.21e-06	5.36	4.91429	1.27612	NSUN5P1	NOP2/Sun RNA methyltransferase family member 5 pseudogene 1	155400
204185_x_at	9.26e-06	1.21e-06	5.35858	4.90899	0.424025	PPID	peptidylprolyl isomerase D	5481			NM_005038
214708_at	9.28e-06	1.22e-06	5.35811	4.90723	1.16363	SNTB1	syntrophin beta 1	6641			BG484314
208743_s_at	9.35e-06	1.23e-06	5.35585	4.89885	0.763821	YWHAB	tyrosine 3-monooxygenase/tryptophan 5-monooxygenase activation protein beta	7529			BC001359
213392_at	9.39e-06	1.23e-06	5.35479	4.8949	0.957426	IQCK	IQ motif containing K	124152			AW070229
201324_at	9.43e-06	1.24e-06	5.35323	4.88909	0.929033	EMP1	epithelial membrane protein 1	2012			NM_001423
45653_at	9.43e-06	1.24e-06	5.35318	4.88892	0.806308	KCTD13	potassium channel tetramerization domain containing 13	253980			AW026481
219591_at	9.52e-06	1.25e-06	5.35066	4.87955	1.11721	CEND1	cell cycle exit and neuronal differentiation 1	51286			NM_016564
201697_s_at	9.58e-06	1.26e-06	5.34894	4.87315	0.628583	DNMT1	DNA (cytosine-5-)-methyltransferase 1	1786			NM_001379
214276_at	9.88e-06	1.3e-06	5.34022	4.84077	0.910614	KLF12	Kruppel like factor 12	11278			N49268
205114_s_at	9.88e-06	1.3e-06	5.34003	4.84008	2.37947	CCL3L3///CCL3L1///CCL3	C-C motif chemokine ligand 3 like 3///C-C motif chemokine ligand 3 like 1///C-C motif chemokine ligand 3	414062///6349///6348			NM_002983
217748_at	9.91e-06	1.31e-06	5.33907	4.83648	0.500142	ADIPOR1	adiponectin receptor 1	51094			NM_015999
215994_x_at	1e-05	1.33e-06	5.33551	4.82327	0.440217	TBC1D9B	TBC1 domain family member 9B	23061
222339_x_at	1.02e-05	1.35e-06	5.33152	4.80847	1.56767
202150_s_at	1.02e-05	1.35e-06	5.33075	4.8056	0.960131	NEDD9	neural precursor cell expressed, developmentally down-regulated 9	4739			U64317
208089_s_at	1.03e-05	1.36e-06	5.32792	4.79509	1.43874	TDRD3	tudor domain containing 3	81550			NM_030794
214100_x_at	1.04e-05	1.38e-06	5.32477	4.78341	1.02239	NSUN5P1	NOP2/Sun RNA methyltransferase family member 5 pseudogene 1	155400			AI284845
201816_s_at	1.04e-05	1.38e-06	5.32407	4.78081	0.715753	GBAS	glioblastoma amplified sequence	2631			NM_001483
208955_at	1.04e-05	1.39e-06	5.32362	4.77913	0.694279	DUT	deoxyuridine triphosphatase	1854			AB049113
220245_at	1.05e-05	1.39e-06	5.32256	4.77521	1.42442	SLC45A2	solute carrier family 45 member 2	51151			NM_016180
200640_at	1.05e-05	1.39e-06	5.32217	4.77376	0.594327	YWHAZ	tyrosine 3-monooxygenase/tryptophan 5-monooxygenase activation protein zeta	7534			NM_003406
206940_s_at	1.06e-05	1.4e-06	5.32035	4.76701	0.789288	POU4F1	POU class 4 homeobox 1	5457			NM_006237
213231_at	1.06e-05	1.41e-06	5.31986	4.76519	1.04321	DMWD	dystrophia myotonica, WD repeat containing	1762			L19267
50314_i_at	1.06e-05	1.41e-06	5.31919	4.76272	1.17978	C20orf27	chromosome 20 open reading frame 27	54976			AI761506
207525_s_at	1.07e-05	1.43e-06	5.31593	4.75061	0.604815	GIPC1	GIPC PDZ domain containing family member 1	10755			NM_005716
203459_s_at	1.08e-05	1.44e-06	5.31408	4.74378	0.631176	VPS16	VPS16, CORVET/HOPS core subunit	64601			NM_022575
40149_at	1.08e-05	1.44e-06	5.31342	4.74132	0.655144	SH2B1	SH2B adaptor protein 1	25970			AL049924
204556_s_at	1.09e-05	1.45e-06	5.31229	4.73715	1.04445	DZIP1	DAZ interacting zinc finger protein 1	22873			AL568422
203154_s_at	1.09e-05	1.45e-06	5.31206	4.73628	0.8328	PAK4	p21 (RAC1) activated kinase 4	10298			NM_005884
213091_at	1.09e-05	1.46e-06	5.31061	4.73091	0.977382	CRTC1	CREB regulated transcription coactivator 1	23373			AB014516
210006_at	1.1e-05	1.47e-06	5.30767	4.72001	0.545093	ABHD14A///ACY1	abhydrolase domain containing 14A///aminoacylase 1	25864///95			BC002571
210272_at	1.11e-05	1.49e-06	5.30553	4.71208	1.4809	CYP2B7P	cytochrome P450 family 2 subfamily B member 7, pseudogene	1556			M29873
202986_at	1.11e-05	1.49e-06	5.30468	4.70892	1.77498	ARNT2	aryl hydrocarbon receptor nuclear translocator 2	9915			NM_014862
218060_s_at	1.12e-05	1.49e-06	5.30438	4.70781	0.6246	USB1	U6 snRNA biogenesis phosphodiesterase 1	79650			NM_024598
201671_x_at	1.12e-05	1.5e-06	5.30387	4.70594	0.695574	USP14	ubiquitin specific peptidase 14	9097			BC003556
200649_at	1.12e-05	1.5e-06	5.30223	4.69985	1.01502	NUCB1	nucleobindin 1	4924			BC002356
204944_at	1.12e-05	1.51e-06	5.3019	4.69864	1.52761	PTPRG	protein tyrosine phosphatase, receptor type G	5793			NM_002841
212680_x_at	1.13e-05	1.52e-06	5.30009	4.69194	1.05927	PPP1R14B	protein phosphatase 1 regulatory inhibitor subunit 14B	26472			BE305165
201040_at	1.13e-05	1.52e-06	5.29999	4.69156	1.12138	GNAI2	G protein subunit alpha i2	2771			NM_002070
217770_at	1.13e-05	1.52e-06	5.29988	4.69116	0.610814	PIGT	phosphatidylinositol glycan anchor biosynthesis class T	51604			NM_015937
218267_at	1.16e-05	1.56e-06	5.29304	4.66582	0.469745	CINP	cyclin dependent kinase 2 interacting protein	51550			NM_032630
202017_at	1.16e-05	1.56e-06	5.29233	4.66321	1.14347	EPHX1	epoxide hydrolase 1	2052			NM_000120
201326_at	1.16e-05	1.57e-06	5.2918	4.66125	0.931908	CCT6A	chaperonin containing TCP1 subunit 6A	908			BE737030
205956_x_at	1.17e-05	1.58e-06	5.28921	4.65166	0.822434	PSMC3IP	PSMC3 interacting protein	29893			NM_013290
212653_s_at	1.18e-05	1.58e-06	5.28868	4.6497	0.852164	EHBP1	EH domain binding protein 1	23301			AB020710
203912_s_at	1.2e-05	1.63e-06	5.28159	4.62347	0.828007	DNASE1L1	deoxyribonuclease 1 like 1	1774			NM_006730
204903_x_at	1.21e-05	1.63e-06	5.28076	4.62041	0.458605	ATG4B	autophagy related 4B cysteine peptidase	23192			AL080168
211982_x_at	1.22e-05	1.65e-06	5.27774	4.60922	0.515666	XPO6	exportin 6	23214			AL546600
201617_x_at	1.23e-05	1.67e-06	5.27465	4.5978	1.3384	CALD1	caldesmon 1	800			NM_004342
211804_s_at	1.24e-05	1.67e-06	5.27408	4.59568	1.61288	CDK2	cyclin dependent kinase 2	1017			AB012305
217945_at	1.24e-05	1.68e-06	5.27338	4.5931	0.799348	BTBD1	BTB domain containing 1	53339			NM_025238
213185_at	1.24e-05	1.68e-06	5.27268	4.59052	0.73683	KIAA0556	KIAA0556	23247			AI758896
218906_x_at	1.24e-05	1.69e-06	5.27246	4.58971	0.717533	KLC2	kinesin light chain 2	64837			NM_022822
217657_at	1.25e-05	1.69e-06	5.27097	4.58422	1.24108				Transcribed locus	Hs.724108	AL583687
205393_s_at	1.26e-05	1.71e-06	5.26919	4.57761	0.788897	CHEK1	checkpoint kinase 1	1111			NM_001274
212694_s_at	1.26e-05	1.71e-06	5.2687	4.57581	0.49483	PCCB	propionyl-CoA carboxylase beta subunit	5096			NM_000532
222037_at	1.27e-05	1.73e-06	5.26493	4.56189	0.977569	MCM4	minichromosome maintenance complex component 4	4173
201218_at	1.28e-05	1.74e-06	5.26342	4.55632	0.677184	CTBP2	C-terminal binding protein 2	1488			N23018
201860_s_at	1.29e-05	1.76e-06	5.26082	4.5467	1.24569	PLAT	plasminogen activator, tissue type	5327			NM_000930
201912_s_at	1.29e-05	1.76e-06	5.26076	4.5465	0.590702	GSPT1	G1 to S phase transition 1	2935			NM_002094
218099_at	1.31e-05	1.78e-06	5.25785	4.53573	0.591358	TEX2	testis expressed 2	55852			NM_018469
218785_s_at	1.31e-05	1.79e-06	5.25699	4.53258	1.58744	IFT22	intraflagellar transport 22	64792			NM_022777
203412_at	1.32e-05	1.8e-06	5.25581	4.52821	0.506056	LZTR1	leucine zipper like transcription regulator 1	8216			NM_006767
203735_x_at	1.32e-05	1.8e-06	5.2544	4.52303	0.639615	PPFIBP1	PPFIA binding protein 1	8496
204308_s_at	1.32e-05	1.81e-06	5.25398	4.52145	0.507159	TECPR2	tectonin beta-propeller repeat containing 2	9895			NM_014844
217462_at	1.33e-05	1.82e-06	5.25163	4.51277	1.78956	MYRF	myelin regulatory factor	745
219715_s_at	1.34e-05	1.84e-06	5.24948	4.50486	0.411174	TDP1	tyrosyl-DNA phosphodiesterase 1	55775			NM_018319
200707_at	1.35e-05	1.85e-06	5.24774	4.49844	1.80193	PRKCSH	protein kinase C substrate 80K-H	5589			NM_002743
211320_s_at	1.37e-05	1.88e-06	5.24432	4.48582	0.849311	PTPRU	protein tyrosine phosphatase, receptor type U	10076			U71075
202311_s_at	1.38e-05	1.89e-06	5.24199	4.47722	1.37661	COL1A1	collagen type I alpha 1 chain	1277			AI743621
201020_at	1.39e-05	1.9e-06	5.24029	4.47095	0.499698	YWHAH	tyrosine 3-monooxygenase/tryptophan 5-monooxygenase activation protein eta	7533			NM_003405
210574_s_at	1.39e-05	1.91e-06	5.23935	4.4675	0.457675	NUDC	nuclear distribution C, dynein complex regulator	10726			AF241788
AFFX-HUMGAPDH/M33197_3_at	1.39e-05	1.92e-06	5.23849	4.46431	0.678556	GAPDH	glyceraldehyde-3-phosphate dehydrogenase	2597
201319_at	1.39e-05	1.92e-06	5.23841	4.46402	0.59495	MYL12A	myosin light chain 12A	10627			NM_006471
221262_s_at	1.4e-05	1.93e-06	5.23733	4.46006	1.3419	SLC2A11	solute carrier family 2 member 11	66035			NM_030807
208372_s_at	1.4e-05	1.93e-06	5.23638	4.45653	1.03461	LIMK1	LIM domain kinase 1	3984			AF134379
205088_at	1.43e-05	1.97e-06	5.23174	4.43943	0.57237	MAMLD1	mastermind like domain containing 1	10046			NM_005491
218857_s_at	1.43e-05	1.97e-06	5.23093	4.43646	1.28935	ASRGL1	asparaginase like 1	80150			NM_025080
201264_at	1.44e-05	1.99e-06	5.22862	4.42794	1.70121	COPE	coatomer protein complex subunit epsilon	11316			NM_007263
221644_s_at	1.45e-05	2e-06	5.22764	4.42433	1.26207	SLC45A2	solute carrier family 45 member 2	51151			BC003597
202397_at	1.46e-05	2.02e-06	5.22453	4.41289	0.822028	NUTF2P4///NUTF2	nuclear transport factor 2 pseudogene 4///nuclear transport factor 2	128322///10204			NM_005796
203750_s_at	1.47e-05	2.02e-06	5.22442	4.41246	1.35698	RARA	retinoic acid receptor alpha	5914			NM_000964
215737_x_at	1.47e-05	2.03e-06	5.22362	4.40953	0.558826	USF2	upstream transcription factor 2, c-fos interacting	7392			X90824
210138_at	1.47e-05	2.03e-06	5.22346	4.40894	1.19982	RGS20	regulator of G-protein signaling 20	8601			AF074979
218132_s_at	1.47e-05	2.04e-06	5.22273	4.40625	0.451908	TSEN34	tRNA splicing endonuclease subunit 34	79042			NM_024075
215134_at	1.5e-05	2.08e-06	5.21668	4.38397	0.868817	PI4K2A	phosphatidylinositol 4-kinase type 2 alpha	55361
203245_s_at	1.54e-05	2.13e-06	5.21051	4.36127	0.624898	LINC00094	long intergenic non-protein coding RNA 94	266655			BC002791
59433_at	1.54e-05	2.13e-06	5.21036	4.36072	0.834604	LOC102725263///LOC389906	uncharacterized LOC102725263///zinc finger protein 839 pseudogene	102725263///389906
200748_s_at	1.54e-05	2.14e-06	5.20909	4.35605	0.77186	FTH1	ferritin heavy chain 1	2495			NM_002032
205865_at	1.55e-05	2.16e-06	5.20757	4.35048	1.09591	ARID3A	AT-rich interaction domain 3A	1820			NM_005224
209836_x_at	1.57e-05	2.18e-06	5.20417	4.33795	0.855897	BOLA2B///BOLA2	bolA family member 2B///bolA family member 2	654483///552900			AF060511
208454_s_at	1.6e-05	2.22e-06	5.19948	4.32072	1.36772	CPQ	carboxypeptidase Q	10404			NM_016134
218213_s_at	1.61e-05	2.25e-06	5.19658	4.31007	0.421711	TMEM258	transmembrane protein 258	746			NM_014206
203943_at	1.62e-05	2.25e-06	5.19566	4.30667	0.560731	KIF3B	kinesin family member 3B	9371			NM_004798
212682_s_at	1.63e-05	2.28e-06	5.19309	4.29725	1.15453	LMF2	lipase maturation factor 2	91289
209026_x_at	1.64e-05	2.29e-06	5.19164	4.2919	0.761556	TUBB	tubulin beta class I	203068			AF141349
217437_s_at	1.64e-05	2.3e-06	5.19073	4.28857	0.953619	TACC1	transforming acidic coiled-coil containing protein 1	6867			AB029026
205640_at	1.65e-05	2.31e-06	5.18937	4.28357	1.20315	ALDH3B1	aldehyde dehydrogenase 3 family member B1	221			NM_000694
201666_at	1.66e-05	2.32e-06	5.18761	4.27712	1.15692	TIMP1	TIMP metallopeptidase inhibitor 1	7076			NM_003254
221829_s_at	1.67e-05	2.34e-06	5.18574	4.27026	0.847569	TNPO1	transportin 1	3842
205591_at	1.69e-05	2.37e-06	5.18196	4.25635	1.83643	OLFM1	olfactomedin 1	10439			NM_006334
212367_at	1.72e-05	2.42e-06	5.17704	4.23833	0.714761	FEM1B	fem-1 homolog B	10116			AI799061
206907_at	1.73e-05	2.42e-06	5.17665	4.23689	0.627163	TNFSF9	tumor necrosis factor superfamily member 9	8744			NM_003811
209336_at	1.74e-05	2.44e-06	5.17424	4.22805	1.02992	PWP2	PWP2 periodic tryptophan protein homolog (yeast)	5822			U56085
219384_s_at	1.74e-05	2.45e-06	5.17423	4.228	0.6335	ADAT1	adenosine deaminase, tRNA specific 1	23536			NM_012091
202834_at	1.74e-05	2.45e-06	5.17389	4.22674	0.849769	AGT	angiotensinogen	183			NM_000029
215330_at	1.75e-05	2.46e-06	5.173	4.22348	1.84734				MRNA; cDNA DKFZp564G222 (from clone DKFZp564G222)	Hs.671957	AL049991
217211_at	1.75e-05	2.47e-06	5.17202	4.21991	1.14682	ACTBP9	actin, beta pseudogene 9	69			D50604
220939_s_at	1.76e-05	2.48e-06	5.17076	4.21528	0.620004	DPP8	dipeptidyl peptidase 8	54878			NM_017743
201163_s_at	1.77e-05	2.5e-06	5.16874	4.20788	1.18119	IGFBP7	insulin like growth factor binding protein 7	3490			NM_001553
212070_at	1.81e-05	2.56e-06	5.16252	4.18508	1.16125	ADGRG1	adhesion G protein-coupled receptor G1	9289			AL554008
218601_at	1.81e-05	2.56e-06	5.16243	4.18475	0.514297	URGCP	upregulator of cell proliferation	55665			NM_017920
200737_at	1.82e-05	2.56e-06	5.16177	4.18233	1.15389	PGK1	phosphoglycerate kinase 1	5230			NM_000291
218007_s_at	1.82e-05	2.57e-06	5.16118	4.18016	0.532401	RPS27L	ribosomal protein S27 like	51065			NM_015920
212792_at	1.83e-05	2.58e-06	5.15975	4.17491	0.675448	DPY19L1	dpy-19 like 1	23333			AB020684
203674_at	1.83e-05	2.58e-06	5.1597	4.17473	0.49029	HELZ	helicase with zinc finger	9931			NM_014877
201112_s_at	1.83e-05	2.59e-06	5.15891	4.17183	0.543798	CSE1L	chromosome segregation 1 like	1434			NM_001316
213947_s_at	1.84e-05	2.6e-06	5.15811	4.16892	1.16415	NUP210	nucleoporin 210	23225			AI867102
218512_at	1.85e-05	2.62e-06	5.15629	4.16223	0.444424	WDR12	WD repeat domain 12	55759			NM_018256
202627_s_at	1.87e-05	2.65e-06	5.15279	4.14944	1.51376	SERPINE1	serpin family E member 1	5054			AL574210
221754_s_at	1.88e-05	2.66e-06	5.1516	4.14507	1.24229	CORO1B	coronin 1B	57175
222077_s_at	1.89e-05	2.67e-06	5.15057	4.14128	0.845486	RACGAP1	Rac GTPase activating protein 1	29127			AU153848
217755_at	1.89e-05	2.68e-06	5.14954	4.13753	0.660303	HN1	hematological and neurological expressed 1	51155			NM_016185
205104_at	1.91e-05	2.71e-06	5.14732	4.12938	1.34465	SNPH	syntaphilin	9751			NM_014723
209205_s_at	1.92e-05	2.73e-06	5.14524	4.12178	0.801346	LMO4	LIM domain only 4	8543			BC003600
209891_at	1.92e-05	2.74e-06	5.14436	4.11856	1.03255	SPC25	SPC25, NDC80 kinetochore complex component	57405			AF225416
200885_at	1.94e-05	2.76e-06	5.14245	4.11156	1.22352	RHOC	ras homolog family member C	389			NM_005167
213896_x_at	1.94e-05	2.76e-06	5.14194	4.1097	1.48112	FAM149B1	family with sequence similarity 149 member B1	317662
204346_s_at	1.95e-05	2.79e-06	5.13969	4.10149	0.860766	RASSF1	Ras association domain family member 1	11186			NM_007182
203968_s_at	1.96e-05	2.79e-06	5.13927	4.09993	0.734865	CDC6	cell division cycle 6	990			NM_001254
202052_s_at	1.96e-05	2.79e-06	5.13889	4.09854	0.754452	RAI14	retinoic acid induced 14	26064			NM_015577
213599_at	1.96e-05	2.8e-06	5.1382	4.096	0.745768	OIP5	Opa interacting protein 5	11339
213061_s_at	2.02e-05	2.89e-06	5.1302	4.06678	0.659272	NTAN1	N-terminal asparagine amidase	123803
203045_at	2.04e-05	2.91e-06	5.12781	4.05803	1.07741	NINJ1	ninjurin 1	4814			NM_004148
206411_s_at	2.05e-05	2.93e-06	5.12639	4.05286	0.785282	ABL2	ABL proto-oncogene 2, non-receptor tyrosine kinase	27			NM_007314
205173_x_at	2.07e-05	2.96e-06	5.12348	4.04222	0.634575	CD58	CD58 molecule	965			NM_001779
221214_s_at	2.09e-05	2.99e-06	5.12043	4.03108	0.747558	MIR7114///NSMF	microRNA 7114///NMDA receptor synaptonuclear signaling and neuronal migration factor	102466223///26012			NM_015537
215161_at	2.12e-05	3.05e-06	5.11592	4.01459	2.03906	CAMK1G	calcium/calmodulin dependent protein kinase IG	57172			AW016039
32541_at	2.13e-05	3.06e-06	5.11494	4.01102	0.761599	PPP3CC	protein phosphatase 3 catalytic subunit gamma	5533			S46622
200041_s_at	2.13e-05	3.07e-06	5.11416	4.00816	0.761252	ATP6V1G2-DDX39B///SNORD84///DDX39B	ATP6V1G2-DDX39B readthrough (NMD candidate)///small nucleolar RNA, C/D box 84///DEAD-box helicase 39B	100532737///692199///7919	NA	NA	NM_004640
201878_at	2.16e-05	3.11e-06	5.11055	3.995	0.765542	ARIH1	ariadne RBR E3 ubiquitin protein ligase 1	25820			N25546
217135_x_at	2.18e-05	3.14e-06	5.10764	3.98438	0.985891
204786_s_at	2.18e-05	3.14e-06	5.10755	3.98403	1.08001	IFNAR2	interferon alpha and beta receptor subunit 2	3455			L41944
212786_at	2.21e-05	3.18e-06	5.10437	3.97245	0.404917	CLEC16A	C-type lectin domain family 16 member A	23274			AA731693
219640_at	2.21e-05	3.18e-06	5.10432	3.97227	1.0338	CLDN15	claudin 15	24146			NM_014343
203617_x_at	2.21e-05	3.19e-06	5.10377	3.97026	0.485519	ELK1	ELK1, ETS transcription factor	2002			NM_005229
213752_at	2.25e-05	3.24e-06	5.09939	3.95427	1.38191	KAZN	kazrin, periplakin interacting protein	23254			BF111846
214200_s_at	2.25e-05	3.25e-06	5.09868	3.95167	1.67992	COL6A1	collagen type VI alpha 1 chain	1291
209082_s_at	2.26e-05	3.26e-06	5.09797	3.94909	0.920907	COL18A1	collagen type XVIII alpha 1 chain	80781			AF018081
219693_at	2.28e-05	3.3e-06	5.09476	3.93739	1.3419	AGPAT4	1-acylglycerol-3-phosphate O-acyltransferase 4	56895			NM_020133
204558_at	2.29e-05	3.31e-06	5.09415	3.93517	1.32767	RAD54L	RAD54-like (S. cerevisiae)	8438			NM_003579
217796_s_at	2.29e-05	3.31e-06	5.09383	3.93401	0.759927	NPLOC4	NPL4 homolog, ubiquitin recognition factor	55666			NM_017921
218562_s_at	2.3e-05	3.33e-06	5.09212	3.92778	0.877378	TMEM57	transmembrane protein 57	55219			NM_018202
201482_at	2.31e-05	3.34e-06	5.09151	3.92557	0.805191	QSOX1	quiescin sulfhydryl oxidase 1	5768			NM_002826
201760_s_at	2.31e-05	3.35e-06	5.09064	3.92237	0.52162	WSB2	WD repeat and SOCS box containing 2	55884			NM_018639
201976_s_at	2.33e-05	3.38e-06	5.0885	3.9146	1.1911	MYO10	myosin X	4651			NM_012334
222139_at	2.34e-05	3.4e-06	5.08671	3.90805	1.56287	ERV3-2	endogenous retrovirus group 3 member 2	57612			AI765383
217027_x_at	2.36e-05	3.42e-06	5.08496	3.90167	1.42324
212846_at	2.36e-05	3.43e-06	5.08422	3.89898	0.542218	RRP1B	ribosomal RNA processing 1B	23076			AA811192
203190_at	2.37e-05	3.45e-06	5.08302	3.89462	0.533736	MIR7113///MIR4691///NDUFS8	microRNA 7113///microRNA 4691///NADH:ubiquinone oxidoreductase core subunit S8	102465669///100616403///4728			NM_002496
201100_s_at	2.37e-05	3.45e-06	5.08256	3.89294	0.449895	USP9X	ubiquitin specific peptidase 9, X-linked	8239
208507_at	2.39e-05	3.47e-06	5.08111	3.88768	1.10264	OR7C2	olfactory receptor family 7 subfamily C member 2	26658			NM_012377
200045_at	2.39e-05	3.47e-06	5.08101	3.8873	0.529383	ABCF1	ATP binding cassette subfamily F member 1	23	NA	NA	NM_001090
208693_s_at	2.4e-05	3.5e-06	5.07903	3.88009	0.372313	GARS	glycyl-tRNA synthetase	2617			D30658
200766_at	2.41e-05	3.51e-06	5.07828	3.87738	1.15074	CTSD	cathepsin D	1509			NM_001909
204169_at	2.42e-05	3.53e-06	5.07695	3.87253	0.543778	IMPDH1	inosine monophosphate dehydrogenase 1	3614			NM_000883
212317_at	2.43e-05	3.54e-06	5.07602	3.86915	0.486989	TNPO3	transportin 3	23534
214695_at	2.43e-05	3.54e-06	5.07584	3.8685	0.500948	UBAP2L	ubiquitin associated protein 2 like	9898			AW051361
205146_x_at	2.44e-05	3.55e-06	5.07481	3.86474	1.40104	APBA3	amyloid beta precursor protein binding family A member 3	9546			NM_004886
218728_s_at	2.47e-05	3.6e-06	5.07153	3.8528	0.56331	CNIH4	cornichon family AMPA receptor auxiliary protein 4	29097			NM_014184
200812_at	2.48e-05	3.63e-06	5.06933	3.84479	0.726747	CCT7	chaperonin containing TCP1 subunit 7	10574			NM_006429
207157_s_at	2.49e-05	3.64e-06	5.06876	3.84271	0.389115	GNG5	G protein subunit gamma 5	2787			NM_005274
205247_at	2.49e-05	3.64e-06	5.06865	3.84233	0.597387	NOTCH4	notch 4	4855			AI743713
217944_at	2.53e-05	3.7e-06	5.06437	3.82676	0.654251	POMGNT1	protein O-linked mannose N-acetylglucosaminyltransferase 1 (beta 1,2-)	55624			NM_017739
217972_at	2.54e-05	3.72e-06	5.06285	3.82124	0.690887	CHCHD3	coiled-coil-helix-coiled-coil-helix domain containing 3	54927			NM_017812
209955_s_at	2.54e-05	3.72e-06	5.0628	3.82105	1.3811	FAP	fibroblast activation protein alpha	2191			U76833
204433_s_at	2.55e-05	3.73e-06	5.06169	3.817	1.27963	SPATA2	spermatogenesis associated 2	9825			U28164
219068_x_at	2.57e-05	3.77e-06	5.05893	3.80698	0.570279	ATAD3B///ATAD3A	ATPase family, AAA domain containing 3B///ATPase family, AAA domain containing 3A	83858///55210			NM_018188
AFFX-HSAC07/X00351_3_at	2.59e-05	3.8e-06	5.05676	3.79912	0.422752	ACTB	actin beta	60
201748_s_at	2.6e-05	3.82e-06	5.05568	3.79519	0.462944	SAFB	scaffold attachment factor B	6294			NM_002967
209054_s_at	2.61e-05	3.83e-06	5.05521	3.79349	0.598467	WHSC1	Wolf-Hirschhorn syndrome candidate 1	7468			AF083389
218916_at	2.62e-05	3.84e-06	5.05397	3.78898	0.748347	ZNF768///ZNF747	zinc finger protein 768///zinc finger protein 747	79724///65988			NM_024671
218333_at	2.62e-05	3.85e-06	5.05374	3.78813	0.528035	DERL2	derlin 2	51009			NM_016041
221061_at	2.64e-05	3.89e-06	5.05093	3.77791	1.35669	PKD2L1	polycystin 2 like 1, transient receptor potential cation channel	9033			NM_016112
212101_at	2.65e-05	3.9e-06	5.05015	3.77509	0.569761	KPNA6	karyopherin subunit alpha 6	23633			AU154321
210334_x_at	2.67e-05	3.93e-06	5.04767	3.76608	0.533244	BIRC5	baculoviral IAP repeat containing 5	332			AB028869
200027_at	2.68e-05	3.94e-06	5.04739	3.76507	0.615707	NARS	asparaginyl-tRNA synthetase	4677	NA	NA	NM_004539
202340_x_at	2.68e-05	3.95e-06	5.04693	3.76339	1.31024	NR4A1	nuclear receptor subfamily 4 group A member 1	3164			NM_002135
218418_s_at	2.69e-05	3.96e-06	5.04606	3.76025	0.848961	KANK2	KN motif and ankyrin repeat domains 2	25959			NM_015493
201899_s_at	2.7e-05	3.99e-06	5.0441	3.75312	0.493557	UBE2A	ubiquitin conjugating enzyme E2 A	7319			NM_003336
208684_at	2.71e-05	3.99e-06	5.04368	3.7516	1.18582	COPA	coatomer protein complex subunit alpha	1314			U24105
202479_s_at	2.71e-05	4e-06	5.04327	3.75013	1.19754	TRIB2	tribbles pseudokinase 2	28951			BC002637
206092_x_at	2.72e-05	4.01e-06	5.04265	3.74788	0.465168	RTEL1	regulator of telomere elongation helicase 1	51750			NM_016434
43977_at	2.72e-05	4.02e-06	5.04224	3.74638	0.408966	TMEM161A	transmembrane protein 161A	54929			AI660497
209874_x_at	2.77e-05	4.1e-06	5.03686	3.72687	0.604415	CNNM2	cyclin and CBS domain divalent metal cation transport mediator 2	54805			AF216962
218241_at	2.8e-05	4.14e-06	5.03412	3.71691	0.393015	GOLGA5	golgin A5	9950			NM_005113
203392_s_at	2.9e-05	4.3e-06	5.02402	3.68032	1.35724	CTBP1	C-terminal binding protein 1	1487			NM_001328
206342_x_at	2.9e-05	4.3e-06	5.02402	3.68029	0.640484	IDS	iduronate 2-sulfatase	3423			NM_006123
201740_at	2.9e-05	4.31e-06	5.02339	3.67803	0.477982	NDUFS3	NADH:ubiquinone oxidoreductase core subunit S3	4722			NM_004551
201362_at	2.91e-05	4.33e-06	5.02207	3.67325	0.842678	IVNS1ABP	influenza virus NS1A binding protein	10625			AF205218
203061_s_at	2.95e-05	4.39e-06	5.0181	3.65886	1.30889	MDC1	mediator of DNA damage checkpoint 1	9656
45526_g_at	2.95e-05	4.4e-06	5.01808	3.65878	0.479642	NAA60	N(alpha)-acetyltransferase 60, NatF catalytic subunit	79903			AI246641
208248_x_at	3.02e-05	4.51e-06	5.01123	3.63398	0.645669	APLP2	amyloid beta precursor like protein 2	334			NM_001642
204696_s_at	3.03e-05	4.52e-06	5.01061	3.63174	1.07849	CDC25A	cell division cycle 25A	993			NM_001789
202009_at	3.04e-05	4.55e-06	5.00886	3.62539	0.461588	TWF2	twinfilin actin binding protein 2	11344			NM_007284
213630_at	3.08e-05	4.6e-06	5.0057	3.61397	1.45205	NACAD	NAC alpha domain containing	23148			AB002361
214718_at	3.08e-05	4.62e-06	5.00498	3.61136	0.678577	GATAD1	GATA zinc finger domain containing 1	57798			AK026142
210957_s_at	3.1e-05	4.65e-06	5.0031	3.60456	0.976851	AFF2	AF4/FMR2 family member 2	2334			L76569
213391_at	3.11e-05	4.66e-06	5.00236	3.6019	0.598144	DPY19L4	dpy-19 like 4 (C. elegans)	286148			AI669947
206471_s_at	3.12e-05	4.67e-06	5.00168	3.59944	1.5285	PLXNC1	plexin C1	10154			NM_005761
217812_at	3.13e-05	4.69e-06	5.00067	3.59577	0.464676	YTHDF2	YTH N6-methyladenosine RNA binding protein 2	51441			NM_016258
203063_at	3.13e-05	4.7e-06	5.00006	3.59359	0.700849	PPM1F	protein phosphatase, Mg2+/Mn2+ dependent 1F	9647			NM_014634
203329_at	3.15e-05	4.72e-06	4.99879	3.58896	0.919293	PTPRM	protein tyrosine phosphatase, receptor type M	5797			NM_002845
221250_s_at	3.15e-05	4.74e-06	4.9981	3.58649	0.98221	MXD3	MAX dimerization protein 3	83463			NM_031300
210112_at	3.18e-05	4.78e-06	4.99551	3.57714	1.26311	HPS1	HPS1, biogenesis of lysosomal organelles complex 3 subunit 1	3257			U96721
205874_at	3.19e-05	4.81e-06	4.99412	3.57208	0.994909	ITPKA	inositol-trisphosphate 3-kinase A	3706			NM_002220
209523_at	3.19e-05	4.81e-06	4.99402	3.57174	0.733985	TAF2	TATA-box binding protein associated factor 2	6873
208912_s_at	3.22e-05	4.85e-06	4.99161	3.56302	0.666548	CNP	2',3'-cyclic nucleotide 3' phosphodiesterase	1267			BC001362
206373_at	3.23e-05	4.86e-06	4.99087	3.56037	1.85652	ZIC1	Zic family member 1	7545			NM_003412
206452_x_at	3.23e-05	4.87e-06	4.99061	3.55942	0.604488	PTPA	protein phosphatase 2 phosphatase activator	5524			NM_021131
215075_s_at	3.23e-05	4.87e-06	4.99034	3.55844	0.508934	GRB2	growth factor receptor bound protein 2	2885			L29511
203669_s_at	3.25e-05	4.91e-06	4.9884	3.55142	0.740478	DGAT1	diacylglycerol O-acyltransferase 1	8694			NM_012079
215982_s_at	3.27e-05	4.93e-06	4.98709	3.5467	0.739578	DXO	decapping exoribonuclease	1797
209029_at	3.32e-05	5.01e-06	4.98286	3.53142	0.364726	COPS7A	COP9 signalosome subunit 7A	50813			AF193844
218282_at	3.32e-05	5.02e-06	4.98232	3.52946	0.651132	EDEM2	ER degradation enhancing alpha-mannosidase like protein 2	55741			NM_018217
208270_s_at	3.38e-05	5.12e-06	4.97738	3.51165	0.654341	RNPEP	arginyl aminopeptidase	6051			NM_020216
208178_x_at	3.38e-05	5.12e-06	4.97694	3.51005	1.46745	TRIO	trio Rho guanine nucleotide exchange factor	7204			NM_007118
218202_x_at	3.4e-05	5.16e-06	4.97512	3.50349	0.783855	MRPL44	mitochondrial ribosomal protein L44	65080			NM_022915
204137_at	3.43e-05	5.21e-06	4.97271	3.49479	0.842022	GPR137B	G protein-coupled receptor 137B	7107			NM_003272
218388_at	3.45e-05	5.23e-06	4.97124	3.48947	0.661943	PGLS	6-phosphogluconolactonase	25796			NM_012088
208905_at	3.45e-05	5.23e-06	4.97117	3.48924	0.536395	CYCS	cytochrome c, somatic	54205			BC005299
218108_at	3.45e-05	5.25e-06	4.97064	3.48731	0.364706	UBR7	ubiquitin protein ligase E3 component n-recognin 7 (putative)	55148			NM_175748
222216_s_at	3.45e-05	5.25e-06	4.97061	3.48722	0.524509	MRPL17	mitochondrial ribosomal protein L17	63875			AK026857
202517_at	3.56e-05	5.43e-06	4.96139	3.45398	1.05546	CRMP1	collapsin response mediator protein 1	1400			NM_001313
209462_at	3.6e-05	5.49e-06	4.95821	3.4425	0.99811	APLP1	amyloid beta precursor like protein 1	333			U48437
210867_at	3.64e-05	5.55e-06	4.95543	3.4325	1.1784	CNOT4	CCR4-NOT transcription complex subunit 4	4850			AF180475
38069_at	3.64e-05	5.55e-06	4.95525	3.43186	1.05665	CLCN7	chloride voltage-gated channel 7	1186			Z67743
222138_s_at	3.66e-05	5.58e-06	4.95407	3.42762	0.739659	WDR13	WD repeat domain 13	64743			AF158978
222036_s_at	3.66e-05	5.59e-06	4.95343	3.42529	0.703995	MCM4	minichromosome maintenance complex component 4	4173
201433_s_at	3.71e-05	5.66e-06	4.95007	3.41319	0.364493	PTDSS1	phosphatidylserine synthase 1	9791			NM_014754
222222_s_at	3.71e-05	5.67e-06	4.94972	3.41193	1.56498	HOMER3	homer scaffolding protein 3	9454
221373_x_at	3.73e-05	5.7e-06	4.94843	3.4073	1.26713	PSPN	persephin	5623			NM_004158
208074_s_at	3.74e-05	5.71e-06	4.94763	3.40443	1.22765	AP2S1	adaptor related protein complex 2 sigma 1 subunit	1175			NM_021575
209968_s_at	3.76e-05	5.76e-06	4.94569	3.39745	0.778888	NCAM1	neural cell adhesion molecule 1	4684			U63041
200973_s_at	3.76e-05	5.76e-06	4.94539	3.39634	1.25275	TSPAN3	tetraspanin 3	10099			NM_005724
212832_s_at	3.77e-05	5.78e-06	4.94451	3.39321	0.375726	CKAP5	cytoskeleton associated protein 5	9793
202771_at	3.81e-05	5.84e-06	4.94189	3.38377	0.797866	PIEZO1	piezo type mechanosensitive ion channel component 1	9780			NM_001142864
220283_at	3.83e-05	5.88e-06	4.93976	3.3761	0.895853	HHIPL2	HHIP like 2	79802			NM_024746
217610_at	3.86e-05	5.93e-06	4.9377	3.3687	0.843797	SPDYE2	speedy/RINGO cell cycle regulator family member E2	441273			AL047879
208736_at	3.89e-05	5.96e-06	4.93605	3.36276	0.474369	ARPC3	actin related protein 2/3 complex subunit 3	10094			AF004561
213404_s_at	3.9e-05	5.98e-06	4.9352	3.35969	0.668589	RHEB	Ras homolog enriched in brain	6009			BF033683
201064_s_at	3.9e-05	5.99e-06	4.9347	3.35789	0.798321	LOC100996696///PABPC4	polyadenylate-binding protein 4 pseudogene///poly(A) binding protein cytoplasmic 4	100996696///8761			NM_003819
200691_s_at	3.91e-05	6.01e-06	4.93414	3.35591	0.455987	HSPA9	heat shock protein family A (Hsp70) member 9	3313			BC000478
208704_x_at	3.96e-05	6.09e-06	4.93028	3.34201	0.666589	APLP2	amyloid beta precursor like protein 2	334			BC000373
219253_at	3.96e-05	6.1e-06	4.93001	3.34104	0.565005	TMEM185B	transmembrane protein 185B	79134			NM_024121
204044_at	3.99e-05	6.14e-06	4.92816	3.33438	1.3156	QPRT	quinolinate phosphoribosyltransferase	23475			NM_014298
216862_s_at	4.03e-05	6.21e-06	4.92499	3.32302	0.558527	CMC4	C-X9-C motif containing 4	100272147			Z24459
221877_at	4.04e-05	6.23e-06	4.92421	3.32021	0.77245	IRGQ	immunity related GTPase Q	126298			BF508835
219047_s_at	4.05e-05	6.25e-06	4.92356	3.31789	1.24874	ZNF668	zinc finger protein 668	79759			NM_024706
217929_s_at	4.06e-05	6.27e-06	4.92262	3.31451	1.53822	KIAA0319L	KIAA0319 like	79932			NM_024874
217729_s_at	4.08e-05	6.31e-06	4.92102	3.30874	0.787394	AES	amino-terminal enhancer of split	166			NM_001130
212509_s_at	4.11e-05	6.35e-06	4.91911	3.30189	0.72594	MXRA7	matrix remodeling associated 7	439921			BF968134
208626_s_at	4.13e-05	6.38e-06	4.91789	3.29752	0.849957	VAT1	vesicle amine transport 1	10493			BC001913
221708_s_at	4.16e-05	6.44e-06	4.91547	3.28881	0.660328	UNC45A	unc-45 myosin chaperone A	55898			BC006214
202616_s_at	4.18e-05	6.46e-06	4.91457	3.28561	0.831399	MECP2	methyl-CpG binding protein 2	4204			AI631140
221682_s_at	4.18e-05	6.47e-06	4.91408	3.28384	1.36709	PCDHGB6	protocadherin gamma subfamily B, 6	56100			AF135156
219195_at	4.21e-05	6.52e-06	4.91199	3.27633	1.19704	PPARGC1A	PPARG coactivator 1 alpha	10891			NM_013261
203580_s_at	4.27e-05	6.61e-06	4.90818	3.26267	0.427424	SLC7A6	solute carrier family 7 member 6	9057			NM_003983
201880_at	4.29e-05	6.64e-06	4.90706	3.25866	0.91362	ARIH1	ariadne RBR E3 ubiquitin protein ligase 1	25820			AL040708
213190_at	4.29e-05	6.65e-06	4.90664	3.25716	1.01557	COG7	component of oligomeric golgi complex 7	91949
207332_s_at	4.31e-05	6.68e-06	4.90559	3.25337	1.05129	TFRC	transferrin receptor	7037			NM_003234
200616_s_at	4.41e-05	6.85e-06	4.89862	3.2284	1.17731	MLEC	malectin	9761			BC000371
209581_at	4.43e-05	6.88e-06	4.89738	3.22397	1.62333	PLA2G16	phospholipase A2 group XVI	11145			BC001387
200990_at	4.46e-05	6.94e-06	4.89536	3.21673	0.806796	TRIM28	tripartite motif containing 28	10155			NM_005762
201968_s_at	4.47e-05	6.94e-06	4.89501	3.21546	0.760583	PGM1	phosphoglucomutase 1	5236			NM_002633
205295_at	4.47e-05	6.95e-06	4.89479	3.21468	1.14684	CKMT2	creatine kinase, mitochondrial 2	1160			NM_001825
204352_at	4.47e-05	6.95e-06	4.89465	3.21419	0.673105	TRAF5	TNF receptor associated factor 5	7188			NM_004619
209464_at	4.47e-05	6.96e-06	4.89446	3.21351	1.21357	AURKB	aurora kinase B	9212			AB011446
204590_x_at	4.51e-05	7.03e-06	4.89177	3.20386	0.826087	VPS33A	VPS33A, CORVET/HOPS core subunit	65082			NM_022916
203756_at	4.54e-05	7.07e-06	4.8902	3.19823	0.961678	ARHGEF17	Rho guanine nucleotide exchange factor 17	9828			NM_014786
200791_s_at	4.57e-05	7.12e-06	4.88829	3.19142	0.535204	IQGAP1	IQ motif containing GTPase activating protein 1	8826			NM_003870
206431_x_at	4.58e-05	7.14e-06	4.88759	3.18889	0.400934	TBC1D9B	TBC1 domain family member 9B	23061			NM_015043
216525_x_at	4.58e-05	7.15e-06	4.88726	3.18771	0.446411	PMS2P3	PMS1 homolog 2, mismatch repair system component pseudogene 3	5387			D38437
201945_at	4.6e-05	7.18e-06	4.88581	3.18252	0.644366	FURIN	furin, paired basic amino acid cleaving enzyme	5045			NM_002569
203256_at	4.64e-05	7.25e-06	4.88337	3.17379	2.30438	CDH3	cadherin 3	1001			NM_001793
217640_x_at	4.65e-05	7.26e-06	4.88306	3.1727	1.05958	SKA1	spindle and kinetochore associated complex subunit 1	220134			BF038461
203941_at	4.65e-05	7.27e-06	4.88256	3.17091	0.421104	INTS9	integrator complex subunit 9	55756			NM_018250
212297_at	4.66e-05	7.29e-06	4.88194	3.16868	0.805182	ATP13A3	ATPase 13A3	79572			BF218804
221999_at	4.66e-05	7.29e-06	4.88174	3.16796	0.355703	VRK3	vaccinia related kinase 3	51231
204906_at	4.67e-05	7.31e-06	4.88109	3.16562	0.807071	RPS6KA2	ribosomal protein S6 kinase A2	6196			BC002363
210840_s_at	4.68e-05	7.33e-06	4.88035	3.163	0.614014	IQGAP1	IQ motif containing GTPase activating protein 1	8826			D29640
213629_x_at	4.69e-05	7.34e-06	4.88008	3.16202	0.957157	MT1F	metallothionein 1F	4494			BF246115
212891_s_at	4.7e-05	7.37e-06	4.87902	3.15821	1.04988	GADD45GIP1	GADD45G interacting protein 1	90480			BF972185
201201_at	4.79e-05	7.52e-06	4.87359	3.13882	0.676407	CSTB	cystatin B	1476			NM_000100
201229_s_at	4.8e-05	7.54e-06	4.87271	3.13565	1.0077	ARIH2	ariadne RBR E3 ubiquitin protein ligase 2	10425			BC000422
32094_at	4.8e-05	7.56e-06	4.87219	3.13381	0.871547	CHST3	carbohydrate sulfotransferase 3	9469			AB017915
213523_at	4.82e-05	7.58e-06	4.87118	3.1302	0.741811	CCNE1	cyclin E1	898
203403_s_at	4.83e-05	7.6e-06	4.87048	3.12769	0.524404	RNF6	ring finger protein 6	6049			NM_005977
212722_s_at	4.86e-05	7.65e-06	4.86886	3.12189	0.572136	JMJD6	arginine demethylase and lysine hydroxylase	23210
201037_at	4.88e-05	7.68e-06	4.86769	3.11771	0.670034	PFKP	phosphofructokinase, platelet	5214			NM_002627
213803_at	4.91e-05	7.74e-06	4.86565	3.11043	0.907161	KPNB1	karyopherin subunit beta 1	3837			BG545463
208794_s_at	4.92e-05	7.75e-06	4.86536	3.10941	0.857811	SMARCA4	SWI/SNF related, matrix associated, actin dependent regulator of chromatin, subfamily a, member 4	6597			D26156
90265_at	4.93e-05	7.76e-06	4.86481	3.10744	0.583041	ADAP1	ArfGAP with dual PH domains 1	11033
217978_s_at	4.93e-05	7.77e-06	4.86468	3.10698	0.358666	UBE2Q1	ubiquitin conjugating enzyme E2 Q1	55585			NM_017582
213133_s_at	4.94e-05	7.78e-06	4.86412	3.10495	0.484387	LOC101060817///GCSH	glycine cleavage system H protein, mitochondrial-like///glycine cleavage system protein H	101060817///2653
33768_at	4.95e-05	7.82e-06	4.86271	3.09992	0.44378	DMWD	dystrophia myotonica, WD repeat containing	1762			L19267
218270_at	4.96e-05	7.84e-06	4.86232	3.09853	0.875506	MRPL24	mitochondrial ribosomal protein L24	79590			NM_024540
203410_at	5.02e-05	7.94e-06	4.8588	3.08597	1.01153	AP3M2	adaptor related protein complex 3 mu 2 subunit	10947			NM_006803
215260_s_at	5.02e-05	7.94e-06	4.85862	3.08531	0.578372	TCF3	transcription factor 3	6929			X52078
209731_at	5.04e-05	7.99e-06	4.85722	3.08031	0.589415	NTHL1	nth like DNA glycosylase 1	4913			U79718
35265_at	5.1e-05	8.08e-06	4.8541	3.06918	0.473079	FXR2	FMR1 autosomal homolog 2	9513			AF044263
201405_s_at	5.1e-05	8.08e-06	4.85394	3.06863	0.397218	COPS6	COP9 signalosome subunit 6	10980			NM_006833
203612_at	5.12e-05	8.12e-06	4.85264	3.064	0.932368	BYSL	bystin like	705			NM_004053
212234_at	5.16e-05	8.18e-06	4.85057	3.05659	0.5423	ASXL1	additional sex combs like 1, transcriptional regulator	171023
41160_at	5.17e-05	8.21e-06	4.84963	3.05323	0.518341	MBD3	methyl-CpG binding domain protein 3	53615
213996_at	5.23e-05	8.3e-06	4.84674	3.04292	0.95693	YPEL1	yippee like 1	29799			NM_013313
218169_at	5.24e-05	8.33e-06	4.84565	3.03906	0.831498	VAC14	Vac14, PIKFYVE complex component	55697			NM_018052
208688_x_at	5.26e-05	8.36e-06	4.84479	3.03598	0.516165	EIF3B	eukaryotic translation initiation factor 3 subunit B	8662			U78525
210161_at	5.27e-05	8.38e-06	4.8441	3.03351	1.33573	NFATC1	nuclear factor of activated T-cells 1	4772			U08015
203055_s_at	5.3e-05	8.43e-06	4.84262	3.02825	0.438241	LOC100505585///ARHGEF1	uncharacterized LOC100505585///Rho guanine nucleotide exchange factor 1	100505585///9138			NM_004706
200658_s_at	5.3e-05	8.44e-06	4.84228	3.02703	0.885566	PHB	prohibitin	5245			AL560017
216236_s_at	5.34e-05	8.5e-06	4.84017	3.01951	1.13304	SLC2A14///SLC2A3	solute carrier family 2 member 14///solute carrier family 2 member 3	144195///6515			AL110298
205586_x_at	5.43e-05	8.66e-06	4.83524	3.00194	1.29824	VGF	VGF nerve growth factor inducible	7425			NM_003378
49329_at	5.44e-05	8.67e-06	4.83476	3.00023	0.617254	KLHL22	kelch like family member 22	84861			N38751
220134_x_at	5.45e-05	8.69e-06	4.83427	2.9985	1.02453	EVA1B	eva-1 homolog B	55194			NM_018166
632_at	5.52e-05	8.81e-06	4.83067	2.98566	0.425517	GSK3A	glycogen synthase kinase 3 alpha	2931			L40027
208302_at	5.52e-05	8.81e-06	4.83052	2.98515	1.04	HMHB1	histocompatibility minor HB-1	57824			NM_021182
213671_s_at	5.53e-05	8.84e-06	4.82971	2.98224	0.599948	MIR6758///MARS	microRNA 6758///methionyl-tRNA synthetase	102465454///4141
204026_s_at	5.6e-05	8.95e-06	4.82625	2.96993	0.668309	ZWINT	ZW10 interacting kinetochore protein	11130			NM_007057
217823_s_at	5.61e-05	8.96e-06	4.82595	2.96886	0.662766	UBE2J1	ubiquitin conjugating enzyme E2 J1	51465			AL562528
212103_at	5.71e-05	9.13e-06	4.82071	2.95022	0.779898	KPNA6	karyopherin subunit alpha 6	23633			BG403834
203183_s_at	5.71e-05	9.15e-06	4.82029	2.94874	0.531503	SMARCD1	SWI/SNF related, matrix associated, actin dependent regulator of chromatin, subfamily d, member 1	6602			NM_003076
208757_at	5.74e-05	9.19e-06	4.81918	2.94479	0.682237	TMED9	transmembrane p24 trafficking protein 9	54732			BC001123
212300_at	5.74e-05	9.19e-06	4.81904	2.94427	1.5223	TXLNA	taxilin alpha	200081
216690_at	5.74e-05	9.2e-06	4.81884	2.94357	0.947478	OR7C1	olfactory receptor family 7 subfamily C member 1	26664
219374_s_at	5.75e-05	9.23e-06	4.81793	2.94034	0.42821	ALG9	ALG9, alpha-1,2-mannosyltransferase	79796			NM_024740
212625_at	5.75e-05	9.23e-06	4.8179	2.94023	0.699913	STX10	syntaxin 10	8677			NM_003765
201849_at	5.76e-05	9.24e-06	4.81766	2.93938	1.06684	BNIP3	BCL2 interacting protein 3	664			NM_004052
217996_at	5.77e-05	9.26e-06	4.81713	2.93749	1.11029	PHLDA1	pleckstrin homology like domain family A member 1	22822			AA576961
201206_s_at	5.77e-05	9.27e-06	4.81675	2.93615	0.899912	RRBP1	ribosome binding protein 1	6238			NM_004587
220789_s_at	5.77e-05	9.27e-06	4.8167	2.93594	1.28154	SNORA5B///TBRG4	small nucleolar RNA, H/ACA box 5B///transforming growth factor beta regulator 4	677795///9238			NM_004749
37226_at	5.77e-05	9.28e-06	4.81648	2.93519	0.427667	BNIP1	BCL2 interacting protein 1	662			U15172
209416_s_at	5.77e-05	9.29e-06	4.8162	2.93418	0.574916	FZR1	fizzy/cell division cycle 20 related 1	51343			AF083810
208307_at	5.82e-05	9.37e-06	4.81381	2.92569	1.39153	RBMY1J///RBMY1E///RBMY1D///RBMY1B///RBMY1F///RBMY1A1	RNA binding motif protein, Y-linked, family 1, member J///RNA binding motif protein, Y-linked, family 1, member E///RNA binding motif protein, Y-linked, family 1, member D///RNA binding motif protein, Y-linked, family 1, member B///RNA binding motif protein, Y-linked, family 1, member F///RNA binding motif protein, Y-linked, family 1, member A1	378951///378950///378949///378948///159163///5940			NM_005058
206745_at	5.94e-05	9.59e-06	4.80752	2.90332	0.650396	HOXC11	homeobox C11	3227			NM_014212
212540_at	6.01e-05	9.71e-06	4.80415	2.89137	0.624834	CDC34	cell division cycle 34	997			BG476661
204466_s_at	6.01e-05	9.71e-06	4.80412	2.89125	1.00383	SNCA	synuclein alpha	6622			BG260394
202257_s_at	6.02e-05	9.73e-06	4.80338	2.88863	0.583405	CD2BP2	CD2 cytoplasmic tail binding protein 2	10421			NM_006110
201794_s_at	6.05e-05	9.78e-06	4.80218	2.88435	0.423067	SMG7	SMG7, nonsense mediated mRNA decay factor	9887
204088_at	6.06e-05	9.8e-06	4.80156	2.88215	1.00959	P2RX4	purinergic receptor P2X 4	5025			NM_002560
203979_at	6.07e-05	9.83e-06	4.80077	2.87935	1.30797	CYP27A1	cytochrome P450 family 27 subfamily A member 1	1593			NM_000784
218203_at	6.09e-05	9.86e-06	4.79988	2.87621	0.38799	ALG5	ALG5, dolichyl-phosphate beta-glucosyltransferase	29880			NM_013338
204653_at	6.24e-05	1.01e-05	4.79269	2.85068	1.1226	TFAP2A	transcription factor AP-2 alpha	7020			BF343007
217855_x_at	6.24e-05	1.01e-05	4.79246	2.84986	0.521553	SDF4	stromal cell derived factor 4	51150			NM_016547
205441_at	6.27e-05	1.02e-05	4.79126	2.84562	0.714579	OCEL1	occludin/ELL domain containing 1	79629			NM_024578
207662_at	6.29e-05	1.02e-05	4.79023	2.84196	1.03347	TBX1	T-box 1	6899			NM_005992
202598_at	6.34e-05	1.03e-05	4.78799	2.83403	0.535206	S100A13	S100 calcium binding protein A13	6284			NM_005979
201737_s_at	6.43e-05	1.05e-05	4.78397	2.81976	1.21797	2019-03-06	membrane associated ring-CH-type finger 6	10299			NM_005885
218567_x_at	6.44e-05	1.05e-05	4.78347	2.818	0.807913	DPP3	dipeptidyl peptidase 3	10072			NM_005700
206470_at	6.53e-05	1.06e-05	4.77951	2.80395	1.79181	PLXNC1	plexin C1	10154			NM_005761
221524_s_at	6.55e-05	1.07e-05	4.77817	2.79922	1.22541	RRAGD	Ras related GTP binding D	58528			AF272036
206778_at	6.58e-05	1.07e-05	4.77685	2.79455	0.770783	CRYBB2	crystallin beta B2	1415			NM_000496
213203_at	6.63e-05	1.08e-05	4.77446	2.78607	0.6305	SNAPC5	small nuclear RNA activating complex polypeptide 5	10302
36552_at	6.64e-05	1.08e-05	4.77389	2.78404	0.513933	C2CD3	C2 calcium dependent domain containing 3	26005			AL080220
210524_x_at	6.66e-05	1.09e-05	4.7732	2.78159	1.00074						AF078844
212437_at	6.66e-05	1.09e-05	4.77292	2.78062	0.978941	CENPB	centromere protein B	1059
205194_at	6.72e-05	1.1e-05	4.77033	2.77143	1.10104	PSPH	phosphoserine phosphatase	5723			NM_004577
213010_at	6.77e-05	1.11e-05	4.76817	2.76378	0.569916	PRKCDBP	protein kinase C delta binding protein	112464
221572_s_at	6.84e-05	1.12e-05	4.76497	2.75246	0.684607	MIR6824///SLC26A6	microRNA 6824///solute carrier family 26 member 6	102465495///65010			AF288410
202760_s_at	6.93e-05	1.14e-05	4.76094	2.7382	1.23738	PALM2-AKAP2///AKAP2	PALM2-AKAP2 readthrough///A-kinase anchoring protein 2	445815///11217			NM_007203
212380_at	6.96e-05	1.14e-05	4.75954	2.73327	0.691432	CMTR1	cap methyltransferase 1	23070			D43949
211340_s_at	6.99e-05	1.15e-05	4.75832	2.72896	0.73186	MIR6756///MCAM	microRNA 6756///melanoma cell adhesion molecule	102465453///4162			M28882
210519_s_at	7e-05	1.15e-05	4.75771	2.72678	0.782482	NQO1	NAD(P)H quinone dehydrogenase 1	1728			BC000906
202281_at	7.01e-05	1.15e-05	4.75733	2.72547	0.504714	GAK	cyclin G associated kinase	2580			NM_005255
214620_x_at	7.01e-05	1.15e-05	4.75717	2.72487	1.02583	PAM	peptidylglycine alpha-amidating monooxygenase	5066			BF038548
91816_f_at	7.03e-05	1.16e-05	4.75635	2.72198	0.727245	MEX3D	mex-3 RNA binding family member D	399664			C18318
202348_s_at	7.1e-05	1.17e-05	4.75358	2.7122	0.402172	TOR1A	torsin family 1 member A	1861			BC000674
203545_at	7.11e-05	1.17e-05	4.75329	2.71118	0.484431	ALG8	ALG8, alpha-1,3-glucosyltransferase	79053			NM_024079
221041_s_at	7.14e-05	1.18e-05	4.75176	2.70575	0.563089	SLC17A5	solute carrier family 17 member 5	26503			NM_012434
201411_s_at	7.17e-05	1.18e-05	4.75063	2.70178	1.29881	PLEKHB2	pleckstrin homology domain containing B2	55041			NM_017958
201263_at	7.19e-05	1.18e-05	4.74993	2.69931	0.563261	TARS	threonyl-tRNA synthetase	6897			NM_152295
38157_at	7.2e-05	1.19e-05	4.7491	2.69638	0.854539	DXO	decapping exoribonuclease	1797			AF059252
204091_at	7.22e-05	1.19e-05	4.74816	2.69304	0.663935	PDE6D	phosphodiesterase 6D	5147			NM_002601
212001_at	7.29e-05	1.2e-05	4.74567	2.68425	0.544717	SUGP2	SURP and G-patch domain containing 2	10147			AV738039
218302_at	7.32e-05	1.21e-05	4.74402	2.67842	1.08039	PSENEN	presenilin enhancer gamma-secretase subunit	55851
201703_s_at	7.36e-05	1.22e-05	4.74252	2.67313	0.493273	PPP1R10	protein phosphatase 1 regulatory subunit 10	5514			NM_002714
203935_at	7.41e-05	1.23e-05	4.74062	2.66642	0.57996	ACVR1	activin A receptor type 1	90			NM_001105
221531_at	7.46e-05	1.23e-05	4.73863	2.65939	0.785647	WDR61	WD repeat domain 61	80349			AF309553
215230_x_at	7.54e-05	1.25e-05	4.73549	2.64833	0.764558	EIF3CL///EIF3C	eukaryotic translation initiation factor 3 subunit C-like///eukaryotic translation initiation factor 3 subunit C	728689///8663			AA679705
200650_s_at	7.54e-05	1.25e-05	4.73538	2.64794	0.496121	LDHA	lactate dehydrogenase A	3939			NM_005566
207253_s_at	7.55e-05	1.25e-05	4.73466	2.64538	0.460511	UBN1	ubinuclein 1	29855
218227_at	7.57e-05	1.26e-05	4.73387	2.64263	0.625903	NUBP2	nucleotide binding protein 2	10101			NM_012225
200918_s_at	7.62e-05	1.26e-05	4.73187	2.63557	0.61609	SRPRA	SRP receptor alpha subunit	6734			NM_003139
209509_s_at	7.64e-05	1.27e-05	4.73104	2.63262	0.369256	DPAGT1	dolichyl-phosphate N-acetylglucosaminephosphotransferase 1	1798			BC000325
201363_s_at	7.66e-05	1.27e-05	4.73029	2.62999	0.656575	IVNS1ABP	influenza virus NS1A binding protein	10625			AB020657
34764_at	7.66e-05	1.27e-05	4.73013	2.62944	0.540309	LARS2	leucyl-tRNA synthetase 2, mitochondrial	23395			D21851
219773_at	7.69e-05	1.28e-05	4.72888	2.62502	1.02192	NOX4	NADPH oxidase 4	50507			NM_016931
211793_s_at	7.74e-05	1.29e-05	4.72702	2.61846	0.930011	ABI2	abl-interactor 2	10152			AF260261
218414_s_at	7.75e-05	1.29e-05	4.72637	2.61617	0.793286	NDE1	nudE neurodevelopment protein 1	54820			NM_017668
203362_s_at	7.83e-05	1.3e-05	4.72352	2.60612	0.808745	MAD2L1	MAD2 mitotic arrest deficient-like 1 (yeast)	4085			NM_002358
211780_x_at	7.83e-05	1.3e-05	4.72348	2.60597	0.550608	DCTN1	dynactin subunit 1	1639			BC006163
219444_at	7.83e-05	1.3e-05	4.72337	2.60559	0.57406	BCORL1	BCL6 corepressor-like 1	63035			NM_021946
215731_s_at	7.87e-05	1.31e-05	4.72188	2.60036	1.66866	MPHOSPH9	M-phase phosphoprotein 9	10198			X98258
201000_at	7.93e-05	1.32e-05	4.71957	2.59221	0.455745	AARS	alanyl-tRNA synthetase	16			NM_001605
217409_at	7.96e-05	1.33e-05	4.71833	2.58784	1.37728						Z22957
209780_at	8.09e-05	1.35e-05	4.71387	2.57215	0.572466	PHTF2	putative homeodomain transcription factor 2	57157			AL136883
209087_x_at	8.09e-05	1.35e-05	4.71375	2.57173	0.987911	MCAM	melanoma cell adhesion molecule	4162			AF089868
201480_s_at	8.11e-05	1.36e-05	4.71285	2.56857	0.47735	SUPT5H	SPT5 homolog, DSIF elongation factor subunit	6829			NM_003169
215515_at	8.13e-05	1.36e-05	4.71206	2.56579	1.45196				MRNA; cDNA DKFZp564G103 (from clone DKFZp564G103)	Hs.585433	AL049268
212020_s_at	8.16e-05	1.37e-05	4.71091	2.56172	0.667575	MKI67	marker of proliferation Ki-67	4288			AU152107
218223_s_at	8.17e-05	1.37e-05	4.71067	2.56089	1.15886	PLEKHO1	pleckstrin homology domain containing O1	51177			NM_016274
203739_at	8.23e-05	1.38e-05	4.70859	2.55355	0.611046	ZNF217	zinc finger protein 217	7764			NM_006526
219349_s_at	8.23e-05	1.38e-05	4.7085	2.55326	0.884203	EXOC2	exocyst complex component 2	55770			NM_018303
217106_x_at	8.23e-05	1.38e-05	4.70845	2.55307	0.405005	DIMT1	DIM1 dimethyladenosine transferase 1 homolog	27292
216405_at	8.24e-05	1.38e-05	4.70791	2.55117	1.50489				HL14 gene encoding beta-galactoside-binding lectin, 3' end, clone 2	Hs.701974	M14087
202866_at	8.24e-05	1.38e-05	4.70784	2.55091	0.649199	DNAJB12	DnaJ heat shock protein family (Hsp40) member B12	54788			BG283782
208611_s_at	8.24e-05	1.38e-05	4.70754	2.54987	0.635519	SPTAN1	spectrin alpha, non-erythrocytic 1	6709			U83867
212032_s_at	8.29e-05	1.39e-05	4.70594	2.54424	1.29862	PTOV1	prostate tumor overexpressed 1	53635			AL046054
216222_s_at	8.31e-05	1.39e-05	4.70516	2.5415	1.40147	MYO10	myosin X	4651
202872_at	8.37e-05	1.41e-05	4.703	2.53388	0.794042	ATP6V1C1	ATPase H+ transporting V1 subunit C1	528
219402_s_at	8.43e-05	1.42e-05	4.7009	2.52652	0.63358	DERL1	derlin 1	79139			NM_024295
209384_at	8.46e-05	1.42e-05	4.69983	2.52274	0.479842	PROSC	proline synthetase cotranscribed homolog (bacterial)	11212			AA176833
216106_at	8.56e-05	1.44e-05	4.69637	2.5106	1.09329	LOC145678	uncharacterized LOC145678	145678			AL109682
216863_s_at	8.57e-05	1.44e-05	4.69619	2.50995	0.634977	MORC2	MORC family CW-type zinc finger 2	22880
222084_s_at	8.6e-05	1.45e-05	4.69509	2.50611	1.57972	SBF1	SET binding factor 1	6305
209372_x_at	8.62e-05	1.45e-05	4.69442	2.50376	1.21812	TUBB2B///TUBB2A	tubulin beta 2B class IIb///tubulin beta 2A class IIa	347733///7280			BF971587
221792_at	8.66e-05	1.46e-05	4.69276	2.4979	0.697287	RAB6B	RAB6B, member RAS oncogene family	51560			AW118072
207856_s_at	8.76e-05	1.48e-05	4.68934	2.48592	0.366239	LOC150776///SMPD4	sphingomyelin phosphodiesterase 4, neutral membrane (neutral sphingomyelinase-3) pseudogene///sphingomyelin phosphodiesterase 4	150776///55627			NM_017951
203792_x_at	8.76e-05	1.48e-05	4.68915	2.48522	0.648103	PCGF2	polycomb group ring finger 2	7703			BC004858
201729_s_at	8.78e-05	1.48e-05	4.68849	2.48291	0.947419	KIAA0100	KIAA0100	9703			NM_014680
213574_s_at	8.93e-05	1.51e-05	4.68371	2.46615	0.773756	KPNB1	karyopherin subunit beta 1	3837			AA861608
200077_s_at	8.93e-05	1.51e-05	4.68359	2.46571	0.365661	OAZ1	ornithine decarboxylase antizyme 1	4946	NA	NA	D87914
208619_at	8.96e-05	1.51e-05	4.68235	2.46138	0.523533	DDB1	damage specific DNA binding protein 1	1642			L40326
201806_s_at	8.97e-05	1.52e-05	4.68214	2.46065	0.820134	ATXN2L	ataxin 2 like	11273			NM_007245
37966_at	8.97e-05	1.52e-05	4.68186	2.45966	0.60358	PARVB	parvin beta	29780			AA187563
221021_s_at	9.03e-05	1.53e-05	4.68014	2.45363	0.400839	CTNNBL1	catenin beta like 1	56259			NM_030877
221210_s_at	9.03e-05	1.53e-05	4.68007	2.45339	1.46878	NPL	N-acetylneuraminate pyruvate lyase	80896			NM_030769
201198_s_at	9.05e-05	1.53e-05	4.67917	2.45023	0.47459	PSMD1	proteasome 26S subunit, non-ATPase 1	5707
203433_at	9.08e-05	1.54e-05	4.67813	2.44658	0.635172	ST20-MTHFS///MTHFS	ST20-MTHFS readthrough///5,10-methenyltetrahydrofolate synthetase (5-formyltetrahydrofolate cyclo-ligase)	100528021///10588			NM_006441
215273_s_at	9.11e-05	1.54e-05	4.67707	2.44286	0.927601	TADA3	transcriptional adaptor 3	10474			AK024982
218184_at	9.14e-05	1.55e-05	4.67588	2.43868	0.498005	TULP4	tubby like protein 4	56995			NM_020245
222379_at	9.14e-05	1.55e-05	4.67579	2.43836	1.32368	KCNE4	potassium voltage-gated channel subfamily E regulatory subunit 4	23704			AI002715
218415_at	9.15e-05	1.55e-05	4.67534	2.43679	0.61812	VPS33B	VPS33B, late endosome and lysosome associated	26276			NM_018668
218233_s_at	9.16e-05	1.56e-05	4.675	2.43561	0.44184	TOMM6///PRICKLE4	translocase of outer mitochondrial membrane 6///prickle planar cell polarity protein 4	100188893///29964
209640_at	9.19e-05	1.56e-05	4.67402	2.43214	0.508079	PML	promyelocytic leukemia	5371			M79462
200695_at	9.2e-05	1.56e-05	4.67343	2.43008	0.727756	PPP2R1A	protein phosphatase 2 scaffold subunit Aalpha	5518			NM_014225
205462_s_at	9.2e-05	1.57e-05	4.67333	2.42975	1.28702	HPCAL1	hippocalcin like 1	3241			NM_002149
210980_s_at	9.21e-05	1.57e-05	4.67297	2.42848	0.673506	ASAH1	N-acylsphingosine amidohydrolase 1	427			U47674
220068_at	9.24e-05	1.57e-05	4.6722	2.42578	1.05044	VPREB3	pre-B lymphocyte 3	29802			NM_013378
215952_s_at	9.25e-05	1.57e-05	4.67172	2.42409	1.00215	OAZ1	ornithine decarboxylase antizyme 1	4946			AF090094
219408_at	9.26e-05	1.58e-05	4.67151	2.42334	1.88058	PRMT7	protein arginine methyltransferase 7	54496			NM_019023
208973_at	9.28e-05	1.58e-05	4.6705	2.41982	0.925028	ERI3	ERI1 exoribonuclease family member 3	79033			BC001072
201527_at	9.33e-05	1.59e-05	4.66884	2.41401	0.855773	LOC101927180///ATP6V1F	V-type proton ATPase subunit F pseudogene///ATPase H+ transporting V1 subunit F	101927180///9296			NM_004231
218164_at	9.33e-05	1.59e-05	4.6686	2.41315	0.869253	SPATA20	spermatogenesis associated 20	64847			NM_022827
202418_at	9.37e-05	1.6e-05	4.66748	2.40924	0.544645	YIF1A	Yip1 interacting factor homolog A, membrane trafficking protein	10897			NM_020470
207657_x_at	9.42e-05	1.61e-05	4.6659	2.40371	0.444692	TNPO1	transportin 1	3842			NM_002270
204617_s_at	9.45e-05	1.61e-05	4.66495	2.40037	0.674816	ACD	adrenocortical dysplasia homolog	65057			NM_022914
205448_s_at	9.47e-05	1.62e-05	4.66441	2.39847	0.553622	MAP3K12	mitogen-activated protein kinase kinase kinase 12	7786			NM_006301
204248_at	9.58e-05	1.64e-05	4.66064	2.38528	1.06906	GNA11	G protein subunit alpha 11	2767			NM_002067
202463_s_at	9.68e-05	1.66e-05	4.65776	2.3752	0.762863	MBD3	methyl-CpG binding domain protein 3	53615
203333_at	9.75e-05	1.67e-05	4.6554	2.36696	0.837861	KIFAP3	kinesin associated protein 3	22920			NM_014970
219150_s_at	9.77e-05	1.67e-05	4.65492	2.36527	1.03604	ADAP1	ArfGAP with dual PH domains 1	11033			NM_006869
212631_at	9.77e-05	1.67e-05	4.65475	2.36469	0.711081	STX7	syntaxin 7	8417			AI566082
200916_at	9.82e-05	1.68e-05	4.6533	2.35961	1.05488	TAGLN2	transgelin 2	8407			NM_003564
218672_at	9.88e-05	1.69e-05	4.65151	2.35333	0.41636	TNFAIP8L2-SCNM1///SCNM1	TNFAIP8L2-SCNM1 readthrough///sodium channel modifier 1	100534012///79005			NM_024041
218623_at	9.91e-05	1.7e-05	4.65048	2.34974	1.23439	HMP19	HMP19 protein	51617			NM_015980
218959_at	9.97e-05	1.71e-05	4.64888	2.34414	0.830314	HOXC10	homeobox C10	3226			NM_017409
202066_at	0.0001	1.72e-05	4.64763	2.33977	0.655626	PPFIA1	PTPRF interacting protein alpha 1	8500			AA195259
203714_s_at	0.0001	1.72e-05	4.64736	2.33885	0.498855	TBCE	tubulin folding cofactor E	6905			NM_003193
211543_s_at	0.0001	1.72e-05	4.64673	2.33662	0.840399	GRK6	G protein-coupled receptor kinase 6	2870			AF040752
212958_x_at	0.000101	1.73e-05	4.64587	2.33362	1.05659	PAM	peptidylglycine alpha-amidating monooxygenase	5066
213041_s_at	0.000101	1.74e-05	4.64376	2.32624	0.647527	ATP5D	ATP synthase, H+ transporting, mitochondrial F1 complex, delta subunit	513			BE798517
202945_at	0.000101	1.74e-05	4.64359	2.32567	0.485845	FPGS	folylpolyglutamate synthase	2356			NM_004957
220525_s_at	0.000101	1.75e-05	4.64309	2.3239	0.430179	AUP1	ancient ubiquitous protein 1	550			NR_126511
202617_s_at	0.000102	1.75e-05	4.64271	2.32258	1.04108	MECP2	methyl-CpG binding protein 2	4204			NM_004992
214080_x_at	0.000102	1.75e-05	4.64228	2.32107	0.438605	PRKCSH	protein kinase C substrate 80K-H	5589
214464_at	0.000102	1.76e-05	4.6417	2.31905	0.687399	CDC42BPA	CDC42 binding protein kinase alpha	8476			NM_003607
214553_s_at	0.000102	1.76e-05	4.64036	2.31438	0.529216	ARPP19	cAMP regulated phosphoprotein 19	10776			NM_006628
219691_at	0.000103	1.77e-05	4.63919	2.31027	1.17452	SAMD9	sterile alpha motif domain containing 9	54809			NM_017654
218001_at	0.000103	1.78e-05	4.63739	2.30399	0.499404	MRPS2	mitochondrial ribosomal protein S2	51116			NM_016034
204319_s_at	0.000103	1.79e-05	4.63703	2.30274	0.48011	RGS10	regulator of G-protein signaling 10	6001			NM_002925
216903_s_at	0.000105	1.81e-05	4.63352	2.29048	0.379454	MICU1	mitochondrial calcium uptake 1	10367
34697_at	0.000105	1.81e-05	4.63258	2.2872	0.58189	LRP6	LDL receptor related protein 6	4040			AF074264
218387_s_at	0.000106	1.83e-05	4.6304	2.27961	0.457277	PGLS	6-phosphogluconolactonase	25796			NM_012088
208786_s_at	0.000106	1.83e-05	4.6299	2.27787	0.647768	MAP1LC3B	microtubule associated protein 1 light chain 3 beta	81631			AF183417
217759_at	0.000107	1.85e-05	4.62764	2.26997	0.394005	TRIM44	tripartite motif containing 44	54765			BF431488
212464_s_at	0.000109	1.89e-05	4.62157	2.24882	1.4221	FN1	fibronectin 1	2335			X02761
217077_s_at	0.000109	1.89e-05	4.62129	2.24782	1.20742	GABBR2	gamma-aminobutyric acid type B receptor subunit 2	9568
209013_x_at	0.000109	1.89e-05	4.62057	2.24532	1.54374	TRIO	trio Rho guanine nucleotide exchange factor	7204			AF091395
218464_s_at	0.000109	1.9e-05	4.61944	2.24137	0.65988	FAM222B	family with sequence similarity 222 member B	55731			NM_018182
203083_at	0.00011	1.91e-05	4.61836	2.23762	1.62935	THBS2	thrombospondin 2	7058			NM_003247
215171_s_at	0.00011	1.91e-05	4.61823	2.23716	0.646513	TIMM17A	translocase of inner mitochondrial membrane 17 homolog A (yeast)	10440
65588_at	0.000111	1.94e-05	4.61372	2.22146	0.776523	SNHG17	small nucleolar RNA host gene 17	388796			AA827892
214704_at	0.000112	1.95e-05	4.61297	2.21882	0.895363	TCF25	transcription factor 25	22980			AK024679
216707_at	0.000112	1.96e-05	4.61111	2.21237	0.836845				MRNA; cDNA DKFZp761L0812 (from clone DKFZp761L0812); partial cds	Hs.675517	AL162044
213895_at	0.000112	1.96e-05	4.61107	2.21222	1.28091	EMP1	epithelial membrane protein 1	2012			BF445047
219189_at	0.000113	1.97e-05	4.60953	2.20686	0.506829	FBXL6	F-box and leucine rich repeat protein 6	26233			NM_024555
209225_x_at	0.000113	1.98e-05	4.60909	2.20532	0.655347	TNPO1	transportin 1	3842
211620_x_at	0.000113	1.98e-05	4.60878	2.20426	1.4294	LOC101928269///LOC100506403///RUNX1	uncharacterized LOC101928269///uncharacterized LOC100506403///runt related transcription factor 1	101928269///100506403///861			L21756
202344_at	0.000113	1.98e-05	4.60868	2.2039	0.963416	HSF1	heat shock transcription factor 1	3297			NM_005526
200820_at	0.000113	1.98e-05	4.60809	2.20185	0.683499	PSMD8	proteasome 26S subunit, non-ATPase 8	5714			NM_002812
203727_at	0.000113	1.98e-05	4.60788	2.20113	0.413935	SKIV2L	Ski2 like RNA helicase	6499			NM_006929
212979_s_at	0.000114	1.99e-05	4.60693	2.19781	0.928672	LOC100294033///TCAF1	protein FAM115A-like///TRPM8 channel associated factor 1	100294033///9747			AW293343
221790_s_at	0.000114	2e-05	4.60543	2.19259	0.609732	LDLRAP1	low density lipoprotein receptor adaptor protein 1	26119			AL545035
202927_at	0.000116	2.04e-05	4.60077	2.17636	0.801878	PIN1	peptidylprolyl cis/trans isomerase, NIMA-interacting 1	5300			NM_006221
218532_s_at	0.000117	2.05e-05	4.59847	2.16836	1.13119	FAM134B	family with sequence similarity 134 member B	54463			NM_019000
216950_s_at	0.000117	2.06e-05	4.59798	2.16667	1.07949	FCGR1CP///FCGR1B///FCGR1A	Fc fragment of IgG receptor Ic, pseudogene///Fc fragment of IgG receptor Ib///Fc fragment of IgG receptor Ia	100132417///2210///2209			X14355
220088_at	0.000118	2.07e-05	4.59599	2.15976	1.68089	C5AR1	complement component 5a receptor 1	728			NM_001736
218982_s_at	0.000118	2.07e-05	4.59587	2.15934	0.429636	MRPS17	mitochondrial ribosomal protein S17	51373			NM_015969
218894_s_at	0.000118	2.08e-05	4.59521	2.15702	1.22478	MAGOHB	mago homolog B, exon junction complex core component	55110			NM_018048
205628_at	0.000118	2.08e-05	4.59498	2.15622	1.15138	PRIM2	primase (DNA) subunit 2	5558			NM_000947
213453_x_at	0.000119	2.08e-05	4.59411	2.15323	0.955466	GAPDH	glyceraldehyde-3-phosphate dehydrogenase	2597			BF689355
212077_at	0.00012	2.11e-05	4.59027	2.13987	0.913304	CALD1	caldesmon 1	800			AL583520
200706_s_at	0.00012	2.12e-05	4.58962	2.1376	1.28687	LITAF	lipopolysaccharide induced TNF factor	9516			NM_004862
218510_x_at	0.00012	2.12e-05	4.58941	2.1369	0.828923	FAM134B	family with sequence similarity 134 member B	54463			AI816291
218362_s_at	0.000121	2.12e-05	4.58897	2.13537	0.739554	DIS3	DIS3 homolog, exosome endoribonuclease and 3'-5' exoribonuclease	22894			NM_014953
213115_at	0.000122	2.16e-05	4.5849	2.12122	0.492799	ATG4A	autophagy related 4A cysteine peptidase	115201
212313_at	0.000123	2.17e-05	4.58309	2.11492	0.4653	CHMP7	charged multivesicular body protein 7	91782			BC004344
204651_at	0.000123	2.18e-05	4.58217	2.11173	0.702395	NRF1	nuclear respiratory factor 1	4899			AW003022
219504_s_at	0.000124	2.19e-05	4.58071	2.10666	0.92541	RPAP2	RNA polymerase II associated protein 2	79871			NM_024813
218732_at	0.000124	2.19e-05	4.57991	2.1039	0.478664	PTRH2	peptidyl-tRNA hydrolase 2	51651			NM_016077
216485_s_at	0.000125	2.2e-05	4.5786	2.09934	1.10651	TPSAB1	tryptase alpha/beta 1	7177			AF206667
202309_at	0.000125	2.21e-05	4.57842	2.09873	0.431245	MTHFD1	methylenetetrahydrofolate dehydrogenase, cyclohydrolase and formyltetrahydrofolate synthetase 1	4522			NM_005956
202830_s_at	0.000125	2.22e-05	4.57676	2.09296	0.996541	SLC37A4	solute carrier family 37 member 4	2542			NM_001467
218591_s_at	0.000126	2.24e-05	4.57423	2.08421	0.742306	NOL10	nucleolar protein 10	79954			NM_024894
215438_x_at	0.000126	2.24e-05	4.57417	2.08399	0.774822	GSPT1	G1 to S phase transition 1	2935			BE906054
213345_at	0.000127	2.25e-05	4.57236	2.07771	0.771632	NFATC4	nuclear factor of activated T-cells 4	4776
201639_s_at	0.000127	2.26e-05	4.57218	2.07709	0.527557	MIR6849///MIR1234///MIR939///CPSF1	microRNA 6849///microRNA 1234///microRNA 939///cleavage and polyadenylation specific factor 1	102466749///100302196///100126351///29894			NM_013291
203284_s_at	0.000127	2.26e-05	4.57212	2.07688	0.661633	HS2ST1	heparan sulfate 2-O-sulfotransferase 1	9653			AW151887
219661_at	0.000128	2.28e-05	4.56949	2.06777	0.848554	RANBP17	RAN binding protein 17	64901			NM_022897
209385_s_at	0.000129	2.29e-05	4.56808	2.06288	0.987098	PROSC	proline synthetase cotranscribed homolog (bacterial)	11212			AL136616
202421_at	0.000129	2.29e-05	4.56753	2.06097	0.891803	IGSF3	immunoglobulin superfamily member 3	3321			AB007935
204104_at	0.000132	2.34e-05	4.56185	2.04128	0.489644	SNAPC2	small nuclear RNA activating complex polypeptide 2	6618			NM_003083
205985_x_at	0.000132	2.35e-05	4.56051	2.03665	0.635796	CLCNKB	chloride voltage-gated channel Kb	1188			NM_000085
219446_at	0.000132	2.36e-05	4.56021	2.0356	0.431655	RIC8B	RIC8 guanine nucleotide exchange factor B	55188			NM_018157
203358_s_at	0.000133	2.37e-05	4.55899	2.03138	1.01203	EZH2	enhancer of zeste 2 polycomb repressive complex 2 subunit	2146			NM_004456
213407_at	0.000134	2.39e-05	4.55585	2.02051	0.761777	PHLPP2	PH domain and leucine rich repeat protein phosphatase 2	23035			AB023148
204511_at	0.000134	2.39e-05	4.55566	2.01985	0.654116	FARP2	FERM, ARH/RhoGEF and pleckstrin domain protein 2	9855			NM_014808
216033_s_at	0.000134	2.4e-05	4.55521	2.0183	1.43696	FYN	FYN proto-oncogene, Src family tyrosine kinase	2534			S74774
58994_at	0.000135	2.41e-05	4.55428	2.01509	0.794026	CC2D1A	coiled-coil and C2 domain containing 1A	54862			AI689402
205165_at	0.000135	2.41e-05	4.55403	2.0142	1.27298	CELSR3	cadherin EGF LAG seven-pass G-type receptor 3	1951			NM_001407
218392_x_at	0.000135	2.42e-05	4.55322	2.0114	0.801142	SFXN1	sideroflexin 1	94081			NM_022754
210869_s_at	0.000136	2.43e-05	4.5516	2.0058	1.03713	MIR6756///MCAM	microRNA 6756///melanoma cell adhesion molecule	102465453///4162			M29277
214766_s_at	0.000136	2.44e-05	4.55051	2.00204	0.635051	AHCTF1	AT-hook containing transcription factor 1	25909			AL080144
202211_at	0.000136	2.44e-05	4.55024	2.0011	0.591165	ARFGAP3	ADP ribosylation factor GTPase activating protein 3	26286			BC005122
217691_x_at	0.000137	2.45e-05	4.54972	1.9993	0.73752	MIR6787///SLC16A3	microRNA 6787///solute carrier family 16 member 3	102465472///9123			AA853175
202913_at	0.000137	2.45e-05	4.54963	1.999	0.651982	ARHGEF11	Rho guanine nucleotide exchange factor 11	9826
201209_at	0.000138	2.47e-05	4.54667	1.98876	0.489675	HDAC1	histone deacetylase 1	3065			NM_004964
207713_s_at	0.000138	2.47e-05	4.5466	1.98851	0.496792	RBCK1	RANBP2-type and C3HC4-type zinc finger containing 1	10616			NM_006462
64474_g_at	0.000138	2.47e-05	4.54642	1.98789	0.576126	MIR1306///DGCR8	microRNA 1306///DGCR8 microprocessor complex subunit	100302197///54487			AA203219
210605_s_at	0.000138	2.48e-05	4.5458	1.98574	1.08395	MFGE8	milk fat globule-EGF factor 8 protein	4240			BC003610
217808_s_at	0.000138	2.48e-05	4.54542	1.98442	0.399212	MAPKAP1	mitogen-activated protein kinase associated protein 1	79109			NM_024117
208874_x_at	0.000139	2.49e-05	4.54469	1.9819	0.526232	PTPA	protein phosphatase 2 phosphatase activator	5524			BC002545
203308_x_at	0.000139	2.5e-05	4.5438	1.97881	0.795858	HPS1	HPS1, biogenesis of lysosomal organelles complex 3 subunit 1	3257
53720_at	0.000139	2.5e-05	4.54306	1.97627	0.73741	C19orf66	chromosome 19 open reading frame 66	55337
205862_at	0.00014	2.51e-05	4.54244	1.97412	1.09196	GREB1	growth regulation by estrogen in breast cancer 1	9687			NM_014668
203696_s_at	0.000141	2.53e-05	4.54032	1.96681	0.706697	RFC2	replication factor C subunit 2	5982			NM_002914
218107_at	0.000142	2.55e-05	4.53859	1.96084	0.434831	WDR26	WD repeat domain 26	80232			NM_025160
216770_at	0.000142	2.56e-05	4.53679	1.95459	0.662799				CDNA: FLJ21672 fis, clone COL09025	Hs.587799	AK025325
205695_at	0.000143	2.58e-05	4.53495	1.94826	0.75501	SDS	serine dehydratase	10993			NM_006843
213226_at	0.000144	2.59e-05	4.53412	1.94539	0.868061	CCNA2	cyclin A2	890			AI346350
216442_x_at	0.000145	2.62e-05	4.53096	1.93449	1.24852	FN1	fibronectin 1	2335
212185_x_at	0.000148	2.66e-05	4.52644	1.91887	0.82323	MT2A	metallothionein 2A	4502			NM_005953
200853_at	0.000148	2.67e-05	4.52559	1.91595	0.742136	H2AFZ	H2A histone family member Z	3015			NM_002106
209695_at	0.00015	2.7e-05	4.52184	1.90302	0.523204	PTP4A3	protein tyrosine phosphatase type IVA, member 3	11156			BC003105
213390_at	0.000151	2.73e-05	4.51891	1.89291	0.556589	ZC3H4	zinc finger CCCH-type containing 4	23211			AB028987
210511_s_at	0.000152	2.75e-05	4.51741	1.88775	1.67102	INHBA	inhibin beta A subunit	3624			M13436
214965_at	0.000153	2.76e-05	4.51597	1.88279	0.686274	SPATA2L	spermatogenesis associated 2 like	124044			AF070574
210214_s_at	0.000153	2.76e-05	4.51589	1.88251	0.788941	BMPR2	bone morphogenetic protein receptor type 2	659			U25110
221846_s_at	0.000153	2.76e-05	4.51575	1.88202	1.02277	CASKIN2	CASK interacting protein 2	57513			AI970096
215458_s_at	0.000153	2.78e-05	4.51432	1.87708	0.683794	SMURF1	SMAD specific E3 ubiquitin protein ligase 1	57154			AF199364
218096_at	0.000153	2.78e-05	4.51395	1.87581	0.436368	AGPAT5	1-acylglycerol-3-phosphate O-acyltransferase 5	55326			NM_018361
35846_at	0.000154	2.78e-05	4.51377	1.87522	0.661256	THRA	thyroid hormone receptor, alpha	7067			M24899
33814_at	0.000154	2.79e-05	4.51272	1.8716	0.496992	PAK4	p21 (RAC1) activated kinase 4	10298			AF005046
201162_at	0.000154	2.79e-05	4.51259	1.87114	1.30282	IGFBP7	insulin like growth factor binding protein 7	3490			NM_001553
202664_at	0.000155	2.8e-05	4.51149	1.86735	0.809633	WIPF1	WAS/WASL interacting protein family member 1	7456			AW058622
221605_s_at	0.000155	2.81e-05	4.51067	1.86451	0.527582	PIPOX	pipecolic acid and sarcosine oxidase	51268			AF136970
210830_s_at	0.000156	2.84e-05	4.50848	1.85699	1.0552	PON2	paraoxonase 2	5445			AF001602
201102_s_at	0.000156	2.84e-05	4.50794	1.85512	0.673905	PFKL	phosphofructokinase, liver type	5211			NM_002626
216227_at	0.000157	2.86e-05	4.50611	1.84884	1.17231	LOC105379655	uncharacterized LOC105379655	105379655	HCG II mRNA	Hs.720720	X81001
204481_at	0.000157	2.86e-05	4.50591	1.84815	0.485744	BRPF1	bromodomain and PHD finger containing 1	7862			NM_004634
214092_x_at	0.000157	2.86e-05	4.50582	1.84785	0.569728	SUGP2	SURP and G-patch domain containing 2	10147
217716_s_at	0.000158	2.88e-05	4.50416	1.84213	1.25895	SEC61A1	Sec61 translocon alpha 1 subunit	29927			NM_013336
209618_at	0.000158	2.89e-05	4.50336	1.83937	1.41232	CTNND2	catenin delta 2	1501			U96136
217039_x_at	0.00016	2.92e-05	4.50061	1.8299	0.979841	ELK2AP	ELK2A, member of ETS oncogene family, pseudogene	2003			AB016195
219169_s_at	0.00016	2.93e-05	4.49974	1.82691	0.446023	TFB1M	transcription factor B1, mitochondrial	51106			NM_016020
203425_s_at	0.00016	2.93e-05	4.49953	1.82618	1.12163	IGFBP5	insulin like growth factor binding protein 5	3488			NM_000599
206072_at	0.00016	2.93e-05	4.49905	1.82454	1.26231	UCN	urocortin	7349			NM_003353
218020_s_at	0.000161	2.95e-05	4.49758	1.8195	0.439821	ZFAND3	zinc finger AN1-type containing 3	60685			NM_021943
209709_s_at	0.000164	2.99e-05	4.49331	1.80481	0.574341	HMMR	hyaluronan mediated motility receptor	3161			U29343
202030_at	0.000164	3e-05	4.49231	1.80137	0.418577	BCKDK	branched chain ketoacid dehydrogenase kinase	10295			NM_005881
221973_at	0.000165	3.02e-05	4.49112	1.79727	1.16416	LOC100506123///LOC100506076	uncharacterized LOC100506123///uncharacterized LOC100506076	100506123///100506076
214449_s_at	0.000166	3.04e-05	4.48919	1.79064	0.796516	RHOQ	ras homolog family member Q	23433			NM_012249
214429_at	0.000167	3.06e-05	4.48737	1.78441	0.604377	MTMR6	myotubularin related protein 6	9107			U47635
212947_at	0.000168	3.08e-05	4.485	1.77626	0.646588	SLC9A8	solute carrier family 9 member A8	23315
206445_s_at	0.000169	3.1e-05	4.48336	1.77064	1.2077	PRMT1	protein arginine methyltransferase 1	3276			NM_001536
211044_at	0.000171	3.14e-05	4.48006	1.75929	0.84865	TRIM14	tripartite motif containing 14	9830			BC006333
203109_at	0.000171	3.14e-05	4.47947	1.75729	1.65864	UBE2M	ubiquitin conjugating enzyme E2 M	9040			NM_003969
202789_at	0.000171	3.15e-05	4.47899	1.75562	0.912679	PLCG1	phospholipase C gamma 1	5335
203160_s_at	0.000171	3.15e-05	4.47882	1.75504	0.471522	RNF8	ring finger protein 8	9025
221912_s_at	0.000171	3.15e-05	4.4788	1.75499	0.859861	CCDC28B	coiled-coil domain containing 28B	79140
205231_s_at	0.000171	3.15e-05	4.47862	1.75436	0.767426	EPM2A	epilepsy, progressive myoclonus type 2A, Lafora disease (laforin)	7957			NM_005670
210400_at	0.000172	3.17e-05	4.47751	1.75056	0.841435	GRIN2C	glutamate ionotropic receptor NMDA type subunit 2C	2905			L76224
202824_s_at	0.000172	3.18e-05	4.47658	1.74736	0.432348	TCEB1	transcription elongation factor B subunit 1	6921			NM_005648
215710_at	0.000172	3.18e-05	4.47638	1.74667	1.05425	ST3GAL4	ST3 beta-galactoside alpha-2,3-sialyltransferase 4	6484
222111_at	0.000174	3.21e-05	4.47404	1.73865	0.854521	FAM63B	family with sequence similarity 63 member B	54629			AU145293
209327_s_at	0.000174	3.21e-05	4.47401	1.73857	1.45199	NOP16	NOP16 nucleolar protein	51491			BC000587
211719_x_at	0.000175	3.23e-05	4.47152	1.73003	1.33178	FN1	fibronectin 1	2335			BC005858
217760_at	0.000176	3.25e-05	4.47004	1.72495	0.284188	TRIM44	tripartite motif containing 44	54765
208474_at	0.000176	3.26e-05	4.46961	1.72348	0.661355	CLDN6	claudin 6	9074			NM_021195
221745_at	0.000176	3.26e-05	4.46945	1.72291	0.749214	DCAF7	DDB1 and CUL4 associated factor 7	10238			BE538424
210410_s_at	0.000177	3.27e-05	4.46805	1.71814	1.2334	MSH5-SAPCD1///SAPCD1///MSH5	MSH5-SAPCD1 readthrough (NMD candidate)///suppressor APC domain containing 1///mutS homolog 5	100532732///401251///4439			AF034759
207494_s_at	0.000177	3.28e-05	4.46801	1.71797	0.960234	ZNF76	zinc finger protein 76	7629			NM_003427
204409_s_at	0.000177	3.28e-05	4.46741	1.71594	1.99586	EIF1AY	eukaryotic translation initiation factor 1A, Y-linked	9086			BC005248
201862_s_at	0.000178	3.29e-05	4.46703	1.71463	0.486831	LRRFIP1	LRR binding FLII interacting protein 1	9208			NM_004735
202802_at	0.000178	3.29e-05	4.46667	1.71341	1.10454	DHPS	deoxyhypusine synthase	1725			NM_001930
203320_at	0.000178	3.3e-05	4.46614	1.71158	0.587218	SH2B3	SH2B adaptor protein 3	10019			NM_005475
217451_at	0.000178	3.3e-05	4.46593	1.71085	0.791441
203411_s_at	0.000181	3.35e-05	4.46158	1.69596	0.689413	LMNA	lamin A/C	4000			NM_005572
215140_at	0.000181	3.36e-05	4.46108	1.69426	1.57809				MRNA full length insert cDNA clone EUROIMAGE 381867	Hs.658868	AL109667
202663_at	0.000182	3.37e-05	4.46002	1.6906	0.959244	WIPF1	WAS/WASL interacting protein family member 1	7456			AI005043
203577_at	0.000182	3.37e-05	4.45998	1.69049	0.598583	GTF2H4	general transcription factor IIH subunit 4	2968			NM_001517
208968_s_at	0.000182	3.38e-05	4.459	1.68711	0.394036	CIAPIN1	cytokine induced apoptosis inhibitor 1	57019			BC002568
211593_s_at	0.000183	3.4e-05	4.45747	1.6819	0.467573	MAST2	microtubule associated serine/threonine kinase 2	23139			AB047005
218861_at	0.000184	3.42e-05	4.45593	1.6766	1.13467	RNF25	ring finger protein 25	64320			NM_022453
202369_s_at	0.000186	3.47e-05	4.45171	1.66219	0.576415	TRAM2	translocation associated membrane protein 2	9697			NM_012288
216080_s_at	0.000188	3.5e-05	4.44977	1.65554	1.14793	FADS3	fatty acid desaturase 3	3995
202963_at	0.00019	3.54e-05	4.44641	1.64405	0.676042	RFX5	regulatory factor X5	5993
206650_at	0.00019	3.54e-05	4.44604	1.6428	1.28586	IQCC	IQ motif containing C	55721			NM_018134
213505_s_at	0.000192	3.58e-05	4.44282	1.63179	0.593347	SUGP2	SURP and G-patch domain containing 2	10147			BG252853
219202_at	0.000194	3.61e-05	4.44031	1.62321	0.500149	RHBDF2	rhomboid 5 homolog 2	79651			NM_024599
203173_s_at	0.000194	3.62e-05	4.44028	1.62311	0.398154	C16orf62	chromosome 16 open reading frame 62	57020
201087_at	0.000194	3.62e-05	4.43991	1.62187	0.41505	PXN	paxillin	5829			NM_002859
218761_at	0.000194	3.63e-05	4.43899	1.61872	0.468845	RNF111	ring finger protein 111	54778			NM_017610
203299_s_at	0.000195	3.64e-05	4.43822	1.61608	0.761522	AP1S2	adaptor related protein complex 1 sigma 2 subunit	8905			AF251295
202988_s_at	0.000195	3.66e-05	4.43689	1.61153	1.82787	RGS1	regulator of G-protein signaling 1	5996			NM_002922
AFFX-HUMGAPDH/M33197_M_at	0.000195	3.66e-05	4.43687	1.61146	1.4727	GAPDH	glyceraldehyde-3-phosphate dehydrogenase	2597
217791_s_at	0.000197	3.69e-05	4.4346	1.60371	0.604917	ALDH18A1	aldehyde dehydrogenase 18 family member A1	5832			NM_002860
205551_at	0.000197	3.7e-05	4.43386	1.60118	1.81346	SV2B	synaptic vesicle glycoprotein 2B	9899			NM_014848
[truncated: 2,545 more rows]
