# Supplementary material for: Identification of differentially expressed methylated genes in melanoma versus nevi using bioinformatics methods
Source: PeerJ. 2020 Jun 3;8:e9273. doi: 10.7717/peerj.9273 (PMC7275674; doi:10.7717/peerj.9273)
Supplement: Supplemental Information 6 [file peerj-08-9273-s006.xlsx]

## Sheet: Sheet1
ID	adj.P.Val	P.Value	t	B	logFC	Name	UCSC_RefGene_Name	UCSC_RefGene_Accession	UCSC_RefGene_Group	RANGE_START	RANGE_END	RANGE_GB	SPOT_ID
cg25790133	2.79e-09	2.31e-14	10.9	22.5349	0.376	cg25790133	FAM193A	NM_003704	TSS200	2627014	2627137	NC_000004.11
cg05083414	2.79e-09	2.36e-14	10.9	22.5136	0.382	cg05083414	FAM193A	NM_003704	TSS200	2627039	2627162	NC_000004.11
cg26814075	2.79e-09	3.53e-14	10.8	22.1164	0.26	cg26814075	LEP	NM_000230	TSS200	127881298	127881421	NC_000007.13
cg19960420	2.79e-09	4.23e-14	10.7	21.9347	0.431	cg19960420				101282185	101282308	NC_000010.10
cg05949640	2.79e-09	4.59e-14	10.7	21.8544	0.365	cg05949640	FAM193A	NM_003704	TSS200	2627057	2627180	NC_000004.11
cg19058262	2.82e-09	5.48e-14	10.6	21.6783	0.155	cg19058262	C19orf26	NM_152769	Body	1231292	1231415	NC_000019.9
cg01867395	2.82e-09	6.07e-14	10.6	21.5767	0.345	cg01867395	PAX6	NM_001127612	TSS200	31839628	31839751	NC_000011.9
cg10506844	2.88e-09	7.12e-14	10.5	21.4185	0.349	cg10506844				101281203	101281326	NC_000010.10
cg04268624	2.98e-09	7.98e-14	10.5	21.3062	0.346	cg04268624				43037285	43037408	NC_000005.9
cg10989214	3.38e-09	9.76e-14	10.4	21.1061	0.337	cg10989214				75704824	75704947	NC_000003.11
cg02287710	3.7e-09	1.14e-13	10.4	20.9502	0.424	cg02287710	DIO3;MIR1247	NM_001362;NR_031649	TSS200;TSS1500	102027660	102027783	NC_000014.8
cg24938077	5.53e-09	2.43e-13	10.2	20.2028	0.161	cg24938077				16859313	16859436	NC_000001.10
cg11679455	5.67e-09	2.8e-13	10.1	20.0594	0.384	cg11679455	GATA3;GATA3	NM_001002295;NM_002051	Body;Body	8100761	8100884	NC_000010.10
cg01331772	7.13e-09	3.82e-13	10	19.7529	0.391	cg01331772				131094827	131094950	NC_000002.11
cg04359418	1.02e-08	5.9e-13	9.88	19.3213	0.269	cg04359418				76573396	76573519	NC_000010.10
cg16267979	1.14e-08	7.12e-13	9.82	19.1333	0.285	cg16267979	GATA3;GATA3	NM_001002295;NM_002051	Body;Body	8100114	8100237	NC_000010.10
cg14035860	1.14e-08	7.52e-13	9.8	19.0798	0.467	cg14035860				55707715	55707838	NC_000014.8
cg05845376	1.46e-08	1.24e-12	9.65	18.5846	0.402	cg05845376	SLC25A2	NM_031947	TSS200	140683632	140683755	NC_000005.9
cg26075184	1.46e-08	1.25e-12	9.65	18.5755	0.403	cg26075184				101281703	101281826	NC_000010.10
cg26353287	1.58e-08	1.43e-12	9.6	18.4425	0.363	cg26353287				42954090	42954213	NC_000005.9
cg19594666	1.63e-08	1.6e-12	9.57	18.3303	0.308	cg19594666	LEP	NM_000230	TSS200	127881280	127881403	NC_000007.13
cg11436222	1.84e-08	1.86e-12	9.52	18.1799	0.264	cg11436222	HIST1H3E	NM_003532	1stExon	26225520	26225643	NC_000006.11
cg16924565	1.88e-08	2.02e-12	9.5	18.0998	0.169	cg16924565	STK24;STK24	NM_003576;NM_001032296	Body;Body	99126283	99126406	NC_000013.10
cg12782180	2e-08	2.19e-12	9.47	18.0194	0.29	cg12782180	LEP	NM_000230	TSS1500	127880932	127881055	NC_000007.13
cg13647973	2.18e-08	2.53e-12	9.43	17.8763	0.237	cg13647973				56061337	56061460	NC_000019.9
cg20354882	2.18e-08	2.61e-12	9.42	17.8457	0.312	cg20354882	AMDHD1	NM_152435	Body	96350795	96350918	NC_000012.11
cg03763118	2.5e-08	3.11e-12	9.37	17.6714	0.314	cg03763118	LGR4	NM_018490	Body	27490958	27491081	NC_000011.9
cg21977377	2.5e-08	3.14e-12	9.36	17.6593	0.425	cg21977377	NKX2-2	NM_002509	Body	21492823	21492946	NC_000020.10
cg16467700	2.71e-08	3.46e-12	9.33	17.563	0.351	cg16467700	ESAM	NM_138961	Body	124626842	124626965	NC_000011.9
cg24919768	2.9e-08	3.77e-12	9.31	17.48	0.298	cg24919768	MALL	NM_005434	Body	110873031	110873154	NC_000002.11
cg18316974	3.27e-08	4.52e-12	9.25	17.2994	0.359	cg18316974	GFI1;GFI1;GFI1	NM_001127215;NM_001127216;NM_005263	Body;Body;Body	92947035	92947158	NC_000001.10
cg27102629	3.31e-08	4.63e-12	9.24	17.2748	0.226	cg27102629				76573155	76573278	NC_000010.10
cg10299976	3.34e-08	4.74e-12	9.24	17.2507	0.323	cg10299976				94455543	94455666	NC_000010.10
cg01571001	3.66e-08	5.32e-12	9.2	17.1373	0.343	cg01571001				128215433	128215556	NC_000003.11
cg01982533	3.66e-08	5.35e-12	9.2	17.1313	0.201	cg01982533	AXIN2	NM_004655	Body	63532630	63532753	NC_000017.10
cg13570972	3.8e-08	5.71e-12	9.18	17.0668	0.327	cg13570972	PAX6	NM_001127612	TSS200	31839632	31839755	NC_000011.9
cg07493435	3.87e-08	5.98e-12	9.16	17.0205	0.28	cg07493435				128556140	128556263	NC_000007.13
cg01664864	3.87e-08	6.08e-12	9.16	17.0047	0.299	cg01664864	DIO3;MIR1247	NM_001362;NR_031649	TSS200;TSS1500	102027677	102027800	NC_000014.8
cg15341124	4.22e-08	7.02e-12	9.12	16.8622	0.273	cg15341124	DIO3;DIO3;MIR1247	NM_001362;NM_001362;NR_031649	5'UTR;1stExon;TSS1500	102027734	102027857	NC_000014.8
cg23479922	4.22e-08	7.03e-12	9.12	16.8597	0.296	cg23479922		NM_001102562	1stExon	16179633	16179756	NC_000005.9
cg11949335	4.26e-08	7.25e-12	9.11	16.8298	0.295	cg11949335	TTC22	NM_001114108	Body	55247408	55247531	NC_000001.10
cg23361290	4.26e-08	7.37e-12	9.1	16.8137	0.241	cg23361290	AMDHD1	NM_152435	Body	96350519	96350642	NC_000012.11
cg24767131	4.36e-08	7.73e-12	9.09	16.7667	0.267	cg24767131	ECEL1P2	NR_028501	TSS200	233251881	233252004	NC_000002.11
cg15851904	4.37e-08	7.83e-12	9.08	16.7535	0.221	cg15851904				64215680	64215803	NC_000012.11
cg01817364	4.65e-08	8.91e-12	9.04	16.6246	0.343	cg01817364				43037411	43037534	NC_000005.9
cg02282631	4.7e-08	9.09e-12	9.04	16.605	0.406	cg02282631				42953543	42953666	NC_000005.9
cg15955522	4.74e-08	9.46e-12	9.03	16.5655	0.332	cg15955522	KCTD16	NM_020768	5'UTR	143553445	143553568	NC_000005.9
cg00236302	4.77e-08	9.73e-12	9.02	16.5371	0.0865	cg00236302	RAP1B;RAP1B	NM_015646;NM_001010942	5'UTR;5'UTR	69004867	69004990	NC_000012.11
cg14549256	4.87e-08	1e-11	9.01	16.5073	0.24	cg14549256	FAM193A	NM_003704	TSS200	2627142	2627265	NC_000004.11
cg09992746	4.94e-08	1.03e-11	9	16.4831	0.291	cg09992746				60285821	60285944	NC_000015.9
cg22104242	4.96e-08	1.04e-11	9	16.4702	0.317	cg22104242	ELOVL7;ELOVL7	NM_024930;NM_001104558	5'UTR;5'UTR	60138883	60139006	NC_000005.9
cg03234702	5.2e-08	1.11e-11	8.98	16.4031	0.333	cg03234702	HIST1H3E	NM_003532	1stExon	26225539	26225662	NC_000006.11
cg22957360	5.34e-08	1.18e-11	8.96	16.3478	0.342	cg22957360				101282572	101282695	NC_000010.10
cg09656389	5.5e-08	1.28e-11	8.93	16.2658	0.35	cg09656389	PAX6	NM_001127612	TSS1500	31839790	31839913	NC_000011.9
cg02812891	5.57e-08	1.32e-11	8.92	16.2357	0.265	cg02812891	ECEL1P2	NR_028501	TSS200	233251773	233251896	NC_000002.11
cg12109823	5.58e-08	1.33e-11	8.92	16.2247	0.373	cg12109823				67454595	67454718	NC_000008.10
cg07501988	5.71e-08	1.4e-11	8.91	16.1775	0.349	cg07501988	MAP4K1;MAP4K1	NM_001042600;NM_007181	Body;Body	39086733	39086856	NC_000019.9
cg26410635	5.85e-08	1.45e-11	8.9	16.1436	0.301	cg26410635	AMDHD1	NM_152435	Body	96350720	96350843	NC_000012.11
cg01987516	6.06e-08	1.53e-11	8.88	16.0896	0.336	cg01987516				101282726	101282849	NC_000010.10
cg16476975	6.51e-08	1.7e-11	8.85	15.9812	0.441	cg16476975				155164995	155165118	NC_000007.13
cg10689404	6.89e-08	1.82e-11	8.83	15.9173	0.354	cg10689404				35300645	35300768	NC_000017.10
cg27512510	6.97e-08	1.86e-11	8.82	15.8926	0.269	cg27512510				149670340	149670463	NC_000001.10
cg26987699	6.97e-08	1.89e-11	8.82	15.8792	0.225	cg26987699	GATA6	NM_005257	Body	19757890	19758013	NC_000018.9
cg06051411	7.21e-08	1.98e-11	8.8	15.8312	0.341	cg06051411	KCTD2	NM_015353	Body	73044991	73045114	NC_000017.10
cg17333109	7.29e-08	2.03e-11	8.8	15.8085	0.121	cg17333109	NKX2-8	NM_014360	Body	37050403	37050526	NC_000014.8
cg10530889	7.34e-08	2.06e-11	8.79	15.7945	0.227	cg10530889				93805590	93805713	NC_000010.10
cg10982443	7.96e-08	2.3e-11	8.76	15.6817	0.369	cg10982443	KLHL33	NM_001109997	5'UTR	20903611	20903734	NC_000014.8
cg09935388	8.05e-08	2.36e-11	8.75	15.6587	0.363	cg09935388	GFI1;GFI1;GFI1	NM_001127215;NM_001127216;NM_005263	Body;Body;Body	92947588	92947711	NC_000001.10
cg01583485	8.05e-08	2.4e-11	8.74	15.6396	0.351	cg01583485	GNRH2;GNRH2;GNRH2	NM_178331;NM_178332;NM_001501	TSS1500;TSS1500;TSS1500	3022925	3023048	NC_000020.10
cg15351688	8.05e-08	2.4e-11	8.74	15.6391	0.233	cg15351688	AMDHD1	NM_152435	Body	96350648	96350771	NC_000012.11
cg09674170	8.24e-08	2.53e-11	8.73	15.5887	0.218	cg09674170	CLDN9	NM_020982	TSS200	3062382	3062505	NC_000016.9
cg13327545	9.01e-08	2.86e-11	8.69	15.4683	0.299	cg13327545				22623548	22623671	NC_000010.10
cg23904955	9.31e-08	2.97e-11	8.68	15.4286	0.262	cg23904955				101282759	101282882	NC_000010.10
cg27172557	9.97e-08	3.2e-11	8.66	15.3548	0.327	cg27172557	TTC7B	NM_001010854	Body	91012362	91012485	NC_000014.8
cg24721899	1.07e-07	3.45e-11	8.64	15.2816	0.354	cg24721899	NKX3-2	NM_001189	Body	13543985	13544108	NC_000004.11
cg01081168	1.1e-07	3.6e-11	8.62	15.2398	0.299	cg01081168				212278486	212278609	NC_000001.10
cg00929635	1.11e-07	3.62e-11	8.62	15.2331	0.279	cg00929635	DBNDD2;DBNDD2;DBNDD2;DBNDD2;SYS1-DBNDD2;DBNDD2;DBNDD2	NM_001048224;NM_001048222;NM_001048225;NM_001048226;NR_003189;NM_001048221;NM_001048223	5'UTR;5'UTR;TSS1500;TSS1500;Body;5'UTR;5'UTR	44035918	44036041	NC_000020.10
cg07810677	1.16e-07	3.92e-11	8.6	15.1543	0.272	cg07810677	COL25A1;COL25A1	NM_198721;NM_032518	Body;Body	109931912	109932035	NC_000004.11
cg13443575	1.18e-07	4.12e-11	8.58	15.1049	0.27	cg13443575	SLFN13	NM_144682	TSS200	33775961	33776084	NC_000017.10
cg18817426	1.19e-07	4.22e-11	8.58	15.081	0.135	cg18817426	COX5A;COX5A	NM_004255;NM_004255	5'UTR;1stExon	75230435	75230558	NC_000015.9
cg07922606	1.19e-07	4.23e-11	8.57	15.0781	0.309	cg07922606	HIST1H3E	NM_003532	1stExon	26225389	26225512	NC_000006.11
cg19276736	1.19e-07	4.27e-11	8.57	15.0685	0.24	cg19276736				24625812	24625935	NC_000002.11
cg13912311	1.19e-07	4.32e-11	8.57	15.0579	0.272	cg13912311	NR5A1	NM_004959	Body	127265348	127265471	NC_000009.11
cg24177393	1.21e-07	4.41e-11	8.56	15.0369	0.273	cg24177393				43037517	43037640	NC_000005.9
cg01024668	1.21e-07	4.48e-11	8.56	15.0223	0.247	cg01024668	C15orf28;ANP32A	NR_026808;NM_006305	TSS1500;Body	69099680	69099803	NC_000015.9
cg14286208	1.25e-07	4.79e-11	8.54	14.9547	0.277	cg14286208	KLHL33	NM_001109997	5'UTR	20903445	20903568	NC_000014.8
cg16032894	1.25e-07	4.86e-11	8.53	14.9415	0.339	cg16032894	MPPED2	NM_001145399	5'UTR	30605411	30605534	NC_000011.9
cg02993070	1.29e-07	5.01e-11	8.52	14.9112	0.257	cg02993070	FERMT2;FERMT2;FERMT2	NM_001134999;NM_001135000;NM_006832	TSS1500;TSS1500;TSS1500	53419111	53419234	NC_000014.8
cg16065050	1.31e-07	5.16e-11	8.52	14.8814	0.342	cg16065050				43000640	43000763	NC_000005.9
cg17239057	1.34e-07	5.34e-11	8.51	14.8472	0.402	cg17239057				224363575	224363698	NC_000001.10
cg20778600	1.34e-07	5.36e-11	8.5	14.8436	0.333	cg20778600	SH3D19;SH3D19;SH3D19	NM_001128924;NM_001128923;NM_001009555	Body;Body;Body	152090378	152090501	NC_000004.11
cg25560398	1.36e-07	5.51e-11	8.5	14.8163	0.172	cg25560398	ECEL1P2	NR_028501	TSS1500	233252170	233252293	NC_000002.11
cg00068750	1.48e-07	6.23e-11	8.46	14.694	0.287	cg00068750	TBC1D24	NM_020705	5'UTR	2535955	2536078	NC_000016.9
cg07371589	1.48e-07	6.25e-11	8.46	14.6907	0.403	cg07371589	SEMA6C	NM_030913	3'UTR	151104367	151104490	NC_000001.10
cg14801518	1.48e-07	6.34e-11	8.45	14.676	0.276	cg14801518				128559075	128559198	NC_000011.9
cg22980079	1.48e-07	6.4e-11	8.45	14.668	0.193	cg22980079	FAM193A	NM_003704	TSS200	2627118	2627241	NC_000004.11
cg01757168	1.56e-07	6.8e-11	8.43	14.6067	0.271	cg01757168				128215565	128215688	NC_000003.11
cg18788664	1.58e-07	6.95e-11	8.43	14.5859	0.379	cg18788664				221068171	221068294	NC_000001.10
cg03407747	1.61e-07	7.08e-11	8.42	14.5665	0.309	cg03407747	ALOX12	NM_000697	TSS200	6899364	6899487	NC_000017.10
cg13651246	1.62e-07	7.22e-11	8.42	14.5474	0.316	cg13651246	LHPP;LHPP	NM_022126;NM_001167880	Body;Body	126278495	126278618	NC_000010.10
cg12634306	1.75e-07	8.01e-11	8.38	14.4449	0.249	cg12634306	HEYL	NM_014571	Body	40098811	40098934	NC_000001.10
cg00616135	1.75e-07	8.02e-11	8.38	14.4428	0.264	cg00616135	LACTB;LACTB	NM_032857;NM_171846	TSS1500;TSS1500	63413614	63413737	NC_000015.9
cg26952618	1.75e-07	8.07e-11	8.38	14.437	0.252	cg26952618	FAM18A;FAM18A	NM_001079512;NM_001079512	1stExon;5'UTR	10912545	10912668	NC_000016.9
cg01565438	1.8e-07	8.43e-11	8.37	14.3933	0.223	cg01565438	SLFN13	NM_144682	TSS1500	33776554	33776677	NC_000017.10
cg02792168	1.82e-07	8.62e-11	8.36	14.3715	0.365	cg02792168				101281924	101282047	NC_000010.10
cg03598731	1.82e-07	8.68e-11	8.36	14.3646	0.313	cg03598731				130996123	130996246	NC_000008.10
cg26047066	1.84e-07	8.84e-11	8.35	14.3465	0.405	cg26047066				221069136	221069259	NC_000001.10
cg13558754	1.84e-07	8.88e-11	8.35	14.342	0.22	cg13558754	HSPB6;C19orf55	NM_144617;NM_001039887	1stExon;TSS1500	36247867	36247990	NC_000019.9
cg10502231	1.85e-07	8.97e-11	8.35	14.3317	0.28	cg10502231				224363449	224363572	NC_000001.10
cg14035969	1.85e-07	8.97e-11	8.35	14.3317	0.276	cg14035969				221068423	221068546	NC_000001.10
cg01076874	1.88e-07	9.25e-11	8.34	14.3012	0.295	cg01076874	LRFN1	NM_020862	3'UTR	39797966	39798089	NC_000019.9
cg27195326	1.88e-07	9.26e-11	8.34	14.3007	0.251	cg27195326	CNTN1;CNTN1	NM_175038;NM_001843	5'UTR;5'UTR	41087459	41087582	NC_000012.11
cg06792262	1.9e-07	9.39e-11	8.34	14.2866	0.236	cg06792262	ZNF167	NM_025169	Body	44622596	44622719	NC_000003.11
cg06608378	1.9e-07	9.41e-11	8.34	14.2842	0.175	cg06608378	ODF3L1	NM_175881	TSS200	76016129	76016252	NC_000015.9
cg08326019	1.9e-07	9.45e-11	8.33	14.2801	0.332	cg08326019	LPPR2;LPPR2	NM_022737;NM_001170635	Body;Body	11472261	11472384	NC_000019.9
cg22486630	1.92e-07	9.66e-11	8.33	14.2587	0.182	cg22486630	LPPR2;LPPR2	NM_022737;NM_001170635	Body;Body	11471954	11472077	NC_000019.9
cg14316944	1.93e-07	9.72e-11	8.33	14.2527	0.238	cg14316944				79485529	79485652	NC_000017.10
cg05314420	1.94e-07	9.9e-11	8.32	14.2346	0.214	cg05314420	MAL;MAL;MAL;MAL	NM_022438;NM_022439;NM_022440;NM_002371	TSS1500;TSS1500;TSS1500;TSS1500	95690169	95690292	NC_000002.11
cg12800962	1.94e-07	9.92e-11	8.32	14.2324	0.226	cg12800962				48626437	48626560	NC_000020.10
cg17406248	1.94e-07	9.93e-11	8.32	14.2313	0.263	cg17406248	C9orf3	NM_032823	Body	97807693	97807816	NC_000009.11
cg09737314	1.94e-07	9.98e-11	8.32	14.2267	0.308	cg09737314	ALOX12	NM_000697	TSS200	6899359	6899482	NC_000017.10
cg21546522	1.97e-07	1.03e-10	8.31	14.1979	0.367	cg21546522				234667549	234667672	NC_000001.10
cg14509403	1.99e-07	1.04e-10	8.31	14.1839	0.274	cg14509403	HORMAD2	NM_152510	TSS200	30476281	30476404	NC_000022.10
cg12262378	2.01e-07	1.07e-10	8.3	14.1611	0.246	cg12262378	ALOX12	NM_000697	1stExon	6899522	6899645	NC_000017.10
cg21587238	2.01e-07	1.07e-10	8.3	14.1609	0.392	cg21587238				42953590	42953713	NC_000005.9
cg10176110	2.01e-07	1.07e-10	8.3	14.1571	0.221	cg10176110	SMOC2;SMOC2	NM_022138;NM_001166412	TSS200;TSS200	168841653	168841776	NC_000006.11
cg19522050	2.02e-07	1.08e-10	8.29	14.1448	0.237	cg19522050				101281275	101281398	NC_000010.10
cg11084334	2.04e-07	1.11e-10	8.29	14.1227	0.285	cg11084334	LHFPL4	NM_198560	Body	9594264	9594387	NC_000003.11
cg15645660	2.04e-07	1.11e-10	8.29	14.1221	0.337	cg15645660	TTC22	NM_001114108	Body	55247356	55247479	NC_000001.10
cg04098339	2.04e-07	1.11e-10	8.29	14.1169	0.242	cg04098339	SLC10A4	NM_152679	1stExon	48486087	48486210	NC_000004.11
cg01856162	2.05e-07	1.12e-10	8.28	14.1075	0.191	cg01856162	ECEL1	NM_004826	Body	233350940	233351063	NC_000002.11
cg01025800	2.07e-07	1.14e-10	8.28	14.092	0.323	cg01025800	PTBP1;PTBP1;PTBP1;PTBP1	NM_031990;NM_175847;NM_031991;NM_002819	Body;Body;Body;Body	807340	807463	NC_000019.9
cg19103219	2.09e-07	1.17e-10	8.27	14.0668	0.308	cg19103219				101287059	101287182	NC_000010.10
cg05168491	2.13e-07	1.21e-10	8.26	14.0371	0.186	cg05168491				38080446	38080569	NC_000014.8
cg15215348	2.13e-07	1.21e-10	8.26	14.0332	0.37	cg15215348	PDE4C	NM_000923	5'UTR	18344520	18344643	NC_000019.9
cg18927077	2.14e-07	1.22e-10	8.26	14.0258	0.261	cg18927077				103605358	103605481	NC_000014.8
cg04521004	2.18e-07	1.27e-10	8.25	13.9871	0.253	cg04521004	SHOX2;SHOX2;SHOX2	NM_001163678;NM_006884;NM_003030	Body;Body;Body	157821262	157821385	NC_000003.11
cg06215569	2.21e-07	1.29e-10	8.24	13.9712	0.339	cg06215569	ALX3	NM_006492	Body	110611465	110611588	NC_000001.10
cg18454133	2.23e-07	1.31e-10	8.24	13.9579	0.336	cg18454133	EFS;EFS	NM_032459;NM_005864	TSS1500;TSS1500	23835870	23835993	NC_000014.8
cg09767822	2.24e-07	1.32e-10	8.24	13.9465	0.287	cg09767822	DBX1	NM_001029865	Body	20178040	20178163	NC_000011.9
cg01025774	2.24e-07	1.33e-10	8.23	13.9407	0.285	cg01025774				42944457	42944580	NC_000005.9
cg23319460	2.24e-07	1.34e-10	8.23	13.9367	0.192	cg23319460	TIGD3	NM_145719	Body	65123510	65123633	NC_000011.9
cg08658787	2.24e-07	1.34e-10	8.23	13.9338	0.302	cg08658787				113916646	113916769	NC_000012.11
cg19259127	2.26e-07	1.37e-10	8.23	13.9141	0.166	cg19259127				72908	73031	NC_000009.11
cg16130802	2.26e-07	1.39e-10	8.22	13.9001	0.202	cg16130802	BCL9L	NM_182557	Body	118773983	118774106	NC_000011.9
cg16820616	2.26e-07	1.39e-10	8.22	13.8985	0.298	cg16820616	MPPED2	NM_001145399	5'UTR	30605581	30605704	NC_000011.9
cg20192747	2.3e-07	1.42e-10	8.21	13.8742	0.268	cg20192747				44774846	44774969	NC_000018.9
cg21334513	2.33e-07	1.46e-10	8.21	13.851	0.362	cg21334513				30095248	30095371	NC_000006.11
cg15197065	2.33e-07	1.47e-10	8.2	13.8446	0.347	cg15197065	CMYA5	NM_153610	TSS200	78985562	78985685	NC_000005.9
cg07053697	2.34e-07	1.48e-10	8.2	13.8356	0.255	cg07053697				111374835	111374958	NC_000012.11
cg27296341	2.34e-07	1.49e-10	8.2	13.8271	0.246	cg27296341	IPCEF1;OPRM1;IPCEF1;IPCEF1	NM_001130699;NM_001008503;NM_015553;NM_001130700	Body;Body;Body;Body	154485839	154485962	NC_000006.11
cg07751331	2.34e-07	1.5e-10	8.2	13.8224	0.297	cg07751331	KIF3C	NM_002254	TSS1500	26205865	26205988	NC_000002.11
cg00326131	2.37e-07	1.52e-10	8.19	13.8066	0.247	cg00326131	RTKN;RTKN;RTKN	NM_001015055;NM_033046;NM_001015056	Body;TSS1500;TSS1500	74668477	74668600	NC_000002.11
cg07498426	2.37e-07	1.53e-10	8.19	13.8024	0.235	cg07498426				125952694	125952817	NC_000011.9
cg14266527	2.38e-07	1.54e-10	8.19	13.7925	0.278	cg14266527	LRBA	NM_006726	Body	151501298	151501421	NC_000004.11
cg05485462	2.38e-07	1.55e-10	8.19	13.7886	0.186	cg05485462	CLDN9	NM_020982	TSS200	3062349	3062472	NC_000016.9
cg00490606	2.38e-07	1.55e-10	8.19	13.7885	0.206	cg00490606	ZNF706;ZNF706;ZNF706;ZNF706;ZNF706;ZNF706	NM_001042510;NM_001042511;NM_001042511;NM_016096;NM_001042510;NM_016096	5'UTR;5'UTR;1stExon;5'UTR;1stExon;1stExon	102217748	102217871	NC_000008.10
cg15979173	2.39e-07	1.56e-10	8.19	13.7832	0.311	cg15979173	BARHL2	NM_020063	1stExon	91182128	91182251	NC_000001.10
cg26758986	2.4e-07	1.58e-10	8.18	13.7693	0.34	cg26758986	P4HA3	NM_182904	TSS200	74022882	74023005	NC_000011.9
cg23279355	2.4e-07	1.59e-10	8.18	13.7661	0.387	cg23279355	CMYA5	NM_153610	TSS200	78985592	78985715	NC_000005.9
cg03354992	2.4e-07	1.59e-10	8.18	13.7645	0.267	cg03354992				88149475	88149598	NC_000010.10
cg14822490	2.42e-07	1.63e-10	8.17	13.7386	0.257	cg14822490	HMX2	NM_005519	3'UTR	124909889	124910012	NC_000010.10
cg13434842	2.43e-07	1.65e-10	8.17	13.7279	0.301	cg13434842	GATA4	NM_002052	Body	11567896	11568019	NC_000008.10
cg22321036	2.44e-07	1.67e-10	8.17	13.7172	0.186	cg22321036				56061348	56061471	NC_000019.9
cg05426966	2.46e-07	1.69e-10	8.16	13.7024	0.249	cg05426966	CDKL2	NM_003948	TSS1500	76556389	76556512	NC_000004.11
cg12052661	2.5e-07	1.73e-10	8.16	13.6791	0.152	cg12052661	CACNA1B	NM_000718	1stExon	140772545	140772668	NC_000009.11
cg05336395	2.54e-07	1.76e-10	8.15	13.6632	0.317	cg05336395	PCDH8;PCDH8	NM_002590;NM_032949	1stExon;1stExon	53421688	53421811	NC_000013.10
cg21187770	2.54e-07	1.77e-10	8.15	13.6598	0.322	cg21187770	KIF3C	NM_002254	TSS1500	26205876	26205999	NC_000002.11
cg20114394	2.55e-07	1.78e-10	8.15	13.6517	0.146	cg20114394	FSTL1	NM_007085	TSS1500	120170441	120170564	NC_000003.11
cg15852312	2.55e-07	1.78e-10	8.15	13.6499	0.227	cg15852312				103673875	103673998	NC_000014.8
cg13300273	2.55e-07	1.79e-10	8.15	13.6455	0.346	cg13300273	GPR25	NM_005298	1stExon	200842890	200843013	NC_000001.10
cg21680980	2.55e-07	1.8e-10	8.14	13.639	0.233	cg21680980				221069572	221069695	NC_000001.10
cg20820259	2.56e-07	1.83e-10	8.14	13.6259	0.284	cg20820259	MAML2	NM_032427	Body	95733601	95733724	NC_000011.9
cg26333652	2.56e-07	1.83e-10	8.14	13.6257	0.283	cg26333652	IRX2;IRX2	NM_033267;NM_001134222	Body;Body	2750758	2750881	NC_000005.9
cg22507154	2.56e-07	1.83e-10	8.14	13.6242	0.362	cg22507154				91185233	91185356	NC_000001.10
cg21158087	2.56e-07	1.84e-10	8.14	13.6201	0.291	cg21158087				58216415	58216538	NC_000017.10
cg04154027	2.65e-07	1.91e-10	8.13	13.5818	0.37	cg04154027	CMYA5	NM_153610	TSS200	78985588	78985711	NC_000005.9
cg08332908	2.68e-07	1.94e-10	8.12	13.5681	0.265	cg08332908	RARA	NM_000964	TSS200	38465326	38465449	NC_000017.10
cg23615741	2.72e-07	1.97e-10	8.12	13.5491	0.354	cg23615741				101297642	101297765	NC_000010.10
cg12647302	2.73e-07	1.99e-10	8.11	13.5403	0.223	cg12647302				17201791	17201914	NC_000001.10
cg18084609	2.73e-07	2e-10	8.11	13.536	0.366	cg18084609	COCH;COCH	NM_001135058;NM_004086	Body;Body	31345041	31345164	NC_000014.8
cg16391955	2.73e-07	2.01e-10	8.11	13.5336	0.308	cg16391955				50881185	50881308	NC_000001.10
cg23378722	2.75e-07	2.03e-10	8.11	13.521	0.263	cg23378722				49882500	49882623	NC_000013.10
cg11113066	2.75e-07	2.04e-10	8.11	13.5168	0.248	cg11113066				101281981	101282104	NC_000010.10
cg18146737	2.76e-07	2.05e-10	8.11	13.5097	0.264	cg18146737	GFI1;GFI1;GFI1	NM_001127215;NM_001127216;NM_005263	Body;Body;Body	92946700	92946823	NC_000001.10
cg23746497	2.79e-07	2.08e-10	8.1	13.4985	0.352	cg23746497				105388668	105388791	NC_000006.11
cg25718342	2.82e-07	2.11e-10	8.1	13.4837	0.356	cg25718342				112074158	112074281	NC_000012.11
cg27649348	2.84e-07	2.13e-10	8.09	13.4737	0.243	cg27649348				42944030	42944153	NC_000005.9
cg09515921	2.87e-07	2.16e-10	8.09	13.4606	0.366	cg09515921	HLX	NM_021958	Body	221057558	221057681	NC_000001.10
cg06097580	2.87e-07	2.16e-10	8.09	13.4589	0.302	cg06097580	AMFR	NM_001144	Body	56456934	56457057	NC_000016.9
cg05922028	2.87e-07	2.17e-10	8.09	13.4546	0.192	cg05922028	CR1;CR1	NM_000573;NM_000651	TSS200;TSS200	207669334	207669457	NC_000001.10
cg16081096	2.87e-07	2.18e-10	8.09	13.4516	0.228	cg16081096	IQSEC1;IQSEC1	NM_001134382;NM_014869	Body;Body	12980202	12980325	NC_000003.11
cg26174326	2.9e-07	2.21e-10	8.08	13.4387	0.277	cg26174326				26016674	26016797	NC_000006.11
cg03678062	2.9e-07	2.21e-10	8.08	13.4355	0.265	cg03678062	ZC3H12D	NM_207360	Body	149772716	149772839	NC_000006.11
cg09858022	2.91e-07	2.23e-10	8.08	13.4293	0.257	cg09858022	RARA	NM_000964	TSS200	38465333	38465456	NC_000017.10
cg09655403	2.93e-07	2.25e-10	8.08	13.4173	0.411	cg09655403	CMYA5	NM_153610	TSS200	78985495	78985618	NC_000005.9
cg08376583	2.93e-07	2.27e-10	8.08	13.4123	0.277	cg08376583				32222492	32222615	NC_000006.11
cg13381984	2.93e-07	2.27e-10	8.08	13.4102	0.268	cg13381984	LEP;LEP	NM_000230;NM_000230	1stExon;5'UTR	127881344	127881467	NC_000007.13
cg02805814	2.93e-07	2.28e-10	8.07	13.4068	0.194	cg02805814				53088482	53088605	NC_000019.9
cg07803375	2.93e-07	2.29e-10	8.07	13.4005	0.344	cg07803375	HEATR2	NM_017802	Body	811206	811329	NC_000007.13
cg06696911	2.93e-07	2.3e-10	8.07	13.399	0.177	cg06696911	FBRSL1	NM_001142641	Body	133147957	133148080	NC_000012.11
cg18024113	2.94e-07	2.33e-10	8.07	13.3864	0.29	cg18024113				16862202	16862325	NC_000001.10
cg12062088	2.97e-07	2.35e-10	8.07	13.3757	0.0883	cg12062088	C19orf26	NM_152769	Body	1231165	1231288	NC_000019.9
cg05291374	2.98e-07	2.38e-10	8.06	13.3641	0.286	cg05291374	DIXDC1;DIXDC1	NM_033425;NM_001037954	TSS1500;Body	111847475	111847598	NC_000011.9
cg06494775	3.05e-07	2.45e-10	8.05	13.3338	0.121	cg06494775	AP2A2	NM_012305	Body	1006303	1006426	NC_000011.9
cg00172849	3.12e-07	2.52e-10	8.04	13.3052	0.276	cg00172849	COL11A1;COL11A1;COL11A1;COL11A1	NM_001168249;NM_080629;NM_080630;NM_001854	TSS1500;TSS1500;TSS1500;TSS1500	103574532	103574655	NC_000001.10
cg12538950	3.2e-07	2.6e-10	8.04	13.2754	0.166	cg12538950	P4HA3	NM_182904	TSS1500	74022910	74023033	NC_000011.9
cg17357561	3.25e-07	2.66e-10	8.03	13.2544	0.217	cg17357561	PTBP1;PTBP1;PTBP1;PTBP1	NM_031990;NM_175847;NM_031991;NM_002819	Body;Body;Body;Body	807322	807445	NC_000019.9
cg03771840	3.26e-07	2.68e-10	8.03	13.2441	0.31	cg03771840	TRIM15	NM_033229	3'UTR	30140145	30140268	NC_000006.11
cg10163955	3.26e-07	2.69e-10	8.03	13.2415	0.232	cg10163955	GATA3;GATA3	NM_001002295;NM_002051	Body;Body	8101402	8101525	NC_000010.10
cg00457258	3.26e-07	2.69e-10	8.03	13.2412	0.0916	cg00457258	INTS1	NM_001080453	Body	1520879	1521002	NC_000007.13
cg11705975	3.27e-07	2.71e-10	8.02	13.2354	0.295	cg11705975	PRLHR	NM_004248	Body	120354248	120354371	NC_000010.10
cg00444151	3.28e-07	2.72e-10	8.02	13.2299	0.279	cg00444151	SLFN12L	NM_001145027	Body	33823619	33823742	NC_000017.10
cg13848598	3.28e-07	2.74e-10	8.02	13.2246	0.23	cg13848598	ADRB1	NM_000684	1stExon	115804578	115804701	NC_000010.10
cg08855938	3.29e-07	2.75e-10	8.02	13.2199	0.311	cg08855938				214398483	214398606	NC_000001.10
cg23848712	3.39e-07	2.92e-10	8	13.1598	0.325	cg23848712	GNRH2;GNRH2;GNRH2	NM_178331;NM_178332;NM_001501	TSS1500;TSS1500;TSS1500	3022992	3023115	NC_000020.10
cg14852082	3.4e-07	2.94e-10	8	13.1553	0.279	cg14852082				1580132	1580255	NC_000004.11
cg21931419	3.56e-07	3.09e-10	7.98	13.1031	0.333	cg21931419	TMEM90A	NM_001105579	TSS1500	74893169	74893292	NC_000014.8
cg00959922	3.59e-07	3.13e-10	7.98	13.0928	0.166	cg00959922	FOXL1	NM_005250	TSS1500	86611049	86611172	NC_000016.9
cg00666845	3.61e-07	3.16e-10	7.98	13.0839	0.244	cg00666845	JUP;JUP	NM_002230;NM_021991	TSS1500;TSS1500	39943423	39943546	NC_000017.10
cg07057579	3.63e-07	3.18e-10	7.98	13.0759	0.206	cg07057579				95870112	95870235	NC_000015.9
cg02057681	3.63e-07	3.19e-10	7.98	13.0724	0.352	cg02057681	CHL1	NM_006614	5'UTR	285234	285357	NC_000003.11
cg16085649	3.7e-07	3.27e-10	7.97	13.0498	0.293	cg16085649	AKAP13;AKAP13	NM_007200;NM_006738	Body;Body	86186011	86186134	NC_000015.9
cg09642740	3.76e-07	3.32e-10	7.96	13.0322	0.235	cg09642740				130995990	130996113	NC_000008.10
cg11830800	3.77e-07	3.34e-10	7.96	13.0267	0.334	cg11830800	CNTN1;CNTN1	NM_175038;NM_001843	5'UTR;5'UTR	41087520	41087643	NC_000012.11
cg05368724	3.77e-07	3.35e-10	7.96	13.0258	0.2	cg05368724	FAM178B;FAM178B	NM_016490;NM_001122646	5'UTR;Body	97561669	97561792	NC_000002.11
cg02213663	3.81e-07	3.4e-10	7.96	13.0111	0.216	cg02213663	DLG5	NM_004747	Body	79632098	79632221	NC_000010.10
cg22134923	3.81e-07	3.41e-10	7.96	13.0082	0.16	cg22134923	AHNAK;AHNAK	NM_024060;NM_001620	TSS1500;TSS1500	62314874	62314997	NC_000011.9
cg04012986	3.84e-07	3.45e-10	7.95	12.9948	0.381	cg04012986	LOC100188947	NR_024467	Body	93350190	93350313	NC_000010.10
cg02984314	3.85e-07	3.47e-10	7.95	12.989	0.131	cg02984314	PTBP1;PTBP1;PTBP1;PTBP1	NM_031990;NM_175847;NM_031991;NM_002819	Body;Body;Body;Body	807355	807478	NC_000019.9
cg08026735	3.85e-07	3.48e-10	7.95	12.988	0.175	cg08026735	VWA3B	NM_144992	5'UTR	98703888	98704011	NC_000002.11
cg14880184	3.85e-07	3.48e-10	7.95	12.9862	0.223	cg14880184	GATA6	NM_005257	Body	19758221	19758344	NC_000018.9
cg13138089	3.86e-07	3.5e-10	7.95	12.9815	0.275	cg13138089	ECEL1P2	NR_028501	TSS200	233251770	233251893	NC_000002.11
cg03581459	3.9e-07	3.54e-10	7.94	12.9694	0.245	cg03581459	PACS2;PACS2	NM_015197;NM_001100913	TSS1500;TSS1500	105780137	105780260	NC_000014.8
cg26355811	3.95e-07	3.61e-10	7.94	12.9497	0.235	cg26355811	LRFN1	NM_020862	Body	39799379	39799502	NC_000019.9
cg24718197	3.95e-07	3.62e-10	7.94	12.9462	0.122	cg24718197				79485709	79485832	NC_000017.10
cg22288613	3.96e-07	3.64e-10	7.94	12.9425	0.319	cg22288613				190962249	190962372	NC_000004.11
cg21153358	3.96e-07	3.64e-10	7.94	12.9411	0.287	cg21153358				86049133	86049256	NC_000004.11
cg24601030	4.02e-07	3.71e-10	7.93	12.9223	0.253	cg24601030	DIXDC1;DIXDC1	NM_033425;NM_001037954	TSS1500;Body	111847747	111847870	NC_000011.9
cg23810282	4.14e-07	3.86e-10	7.92	12.8828	0.268	cg23810282				43037519	43037642	NC_000005.9
cg02662828	4.14e-07	3.87e-10	7.92	12.8815	0.245	cg02662828	ZAR1	NM_175619	1stExon	48492848	48492971	NC_000004.11
cg08057277	4.18e-07	3.92e-10	7.92	12.8697	0.12	cg08057277	LOC440461	NR_027283	Body	66195485	66195608	NC_000017.10
cg08100944	4.18e-07	3.93e-10	7.91	12.8659	0.186	cg08100944	IRF5;IRF5;IRF5;IRF5;IRF5;IRF5	NM_001098630;NM_032643;NM_001098631;NM_002200;NM_001098629;NM_001098628	5'UTR;5'UTR;5'UTR;5'UTR;5'UTR;5'UTR	128578546	128578669	NC_000007.13
cg02344497	4.19e-07	3.95e-10	7.91	12.8611	0.3	cg02344497	SLC4A7	NM_003615	Body	27472828	27472951	NC_000003.11
cg16209517	4.19e-07	3.97e-10	7.91	12.8559	0.318	cg16209517	KIAA1737	NM_033426	Body	77577612	77577735	NC_000014.8
cg03143486	4.19e-07	3.98e-10	7.91	12.8547	0.272	cg03143486	HEATR2	NM_017802	Body	811491	811614	NC_000007.13
cg00002033	4.19e-07	3.99e-10	7.91	12.8517	0.227	cg00002033	LRFN1	NM_020862	Body	39798481	39798604	NC_000019.9
cg19307003	4.19e-07	3.99e-10	7.91	12.8513	0.333	cg19307003	CD6	NM_006725	Body	60775715	60775838	NC_000011.9
cg00611789	4.23e-07	4.04e-10	7.91	12.8387	0.381	cg00611789	CMYA5	NM_153610	TSS1500	78985432	78985555	NC_000005.9
cg04862556	4.23e-07	4.04e-10	7.91	12.8383	0.23	cg04862556	SLFN13	NM_144682	TSS200	33775933	33776056	NC_000017.10
cg02962521	4.25e-07	4.12e-10	7.9	12.8201	0.258	cg02962521				19744694	19744817	NC_000018.9
cg14131273	4.29e-07	4.17e-10	7.9	12.8076	0.208	cg14131273	BARHL1	NM_020064	Body	135464095	135464218	NC_000009.11
cg15134801	4.33e-07	4.23e-10	7.89	12.793	0.286	cg15134801	ELOVL7;ELOVL7	NM_024930;NM_001104558	5'UTR;5'UTR	60138838	60138961	NC_000005.9
cg24818566	4.33e-07	4.24e-10	7.89	12.7903	0.124	cg24818566	DBC1	NM_014618	TSS1500	122132054	122132177	NC_000009.11
cg22633280	4.41e-07	4.34e-10	7.89	12.7682	0.164	cg22633280				110671907	110672030	NC_000010.10
cg25233900	4.43e-07	4.37e-10	7.88	12.7617	0.306	cg25233900	BNIP3	NM_004052	Body	133793646	133793769	NC_000010.10
cg16235748	4.45e-07	4.41e-10	7.88	12.7522	0.222	cg16235748	ZC3H12D	NM_207360	Body	149772707	149772830	NC_000006.11
cg03935183	4.46e-07	4.43e-10	7.88	12.7477	0.26	cg03935183	GATA3;GATA3	NM_001002295;NM_002051	Body;Body	8100563	8100686	NC_000010.10
cg03762994	4.65e-07	4.64e-10	7.87	12.7012	0.279	cg03762994	ALOX12	NM_000697	TSS200	6899332	6899455	NC_000017.10
cg00456637	4.67e-07	4.7e-10	7.86	12.6891	0.176	cg00456637	NKX2-8	NM_014360	Body	37050455	37050578	NC_000014.8
cg17953764	4.67e-07	4.7e-10	7.86	12.6885	0.262	cg17953764	ZAR1	NM_175619	1stExon	48492845	48492968	NC_000004.11
cg11460727	4.67e-07	4.71e-10	7.86	12.6859	0.279	cg11460727	EGR3	NM_004430	Body	22548952	22549075	NC_000008.10
cg14410016	4.75e-07	4.83e-10	7.85	12.6621	0.26	cg14410016	HOXD9	NM_014213	TSS1500	176986659	176986782	NC_000002.11
cg14957346	4.76e-07	4.84e-10	7.85	12.6592	0.256	cg14957346	JUP;JUP	NM_002230;NM_021991	TSS1500;TSS1500	39943439	39943562	NC_000017.10
cg19130973	4.78e-07	4.89e-10	7.85	12.6484	0.24	cg19130973	IQSEC1;IQSEC1	NM_001134382;NM_014869	Body;Body	12979917	12980040	NC_000003.11
cg23259375	4.78e-07	4.9e-10	7.85	12.6468	0.219	cg23259375				26016732	26016855	NC_000006.11
cg25514475	4.83e-07	4.97e-10	7.85	12.6337	0.251	cg25514475	UBTD2	NM_152277	Body	171693762	171693885	NC_000005.9
cg04046669	4.87e-07	5.02e-10	7.84	12.6228	0.288	cg04046669	HORMAD2	NM_152510	TSS1500	30476206	30476329	NC_000022.10
cg14830003	4.89e-07	5.06e-10	7.84	12.6157	0.303	cg14830003	DNALI1	NM_003462	1stExon	38022657	38022780	NC_000001.10
cg00091633	4.9e-07	5.07e-10	7.84	12.6125	0.21	cg00091633	FSTL1	NM_007085	TSS1500	120170383	120170506	NC_000003.11
cg13846270	4.92e-07	5.11e-10	7.84	12.6055	0.283	cg13846270	DLEU7	NM_198989	TSS200	51417929	51418052	NC_000013.10
cg03880841	4.99e-07	5.2e-10	7.83	12.5886	0.0642	cg03880841	MIR210	NR_029623	Body	568178	568301	NC_000011.9
cg03546977	4.99e-07	5.21e-10	7.83	12.587	0.297	cg03546977	CMYA5	NM_153610	TSS200	78985489	78985612	NC_000005.9
cg01106338	4.99e-07	5.22e-10	7.83	12.5838	0.128	cg01106338				44790514	44790637	NC_000018.9
cg19904058	5.09e-07	5.36e-10	7.82	12.559	0.324	cg19904058	LOC619207	NR_002934	Body	135279010	135279133	NC_000010.10
cg22762215	5.13e-07	5.44e-10	7.82	12.5431	0.349	cg22762215				29521272	29521395	NC_000006.11
cg13641903	5.15e-07	5.48e-10	7.82	12.5364	0.188	cg13641903	WT1;WT1;WT1;WT1	NM_024425;NM_024426;NM_000378;NM_024424	Body;Body;Body;Body	32452608	32452731	NC_000011.9
cg04828133	5.2e-07	5.56e-10	7.81	12.5226	0.38	cg04828133				155259845	155259968	NC_000007.13
cg09743437	5.23e-07	5.6e-10	7.81	12.5143	0.283	cg09743437				43000790	43000913	NC_000005.9
cg10286380	5.39e-07	5.83e-10	7.8	12.4742	0.0896	cg10286380	SHANK1	NM_016148	Body	51171847	51171970	NC_000019.9
cg17485681	5.43e-07	5.88e-10	7.8	12.4655	0.274	cg17485681	CDH23	NM_022124	Body	73565625	73565748	NC_000010.10
cg15916004	5.68e-07	6.21e-10	7.78	12.4126	0.242	cg15916004	GAL3ST3;GAL3ST3	NM_033036;NM_033036	5'UTR;1stExon	65816646	65816769	NC_000011.9
cg09017434	5.74e-07	6.32e-10	7.77	12.3954	0.233	cg09017434		NM_001102562	1stExon	16179660	16179783	NC_000005.9
cg13771313	5.76e-07	6.38e-10	7.77	12.3859	0.149	cg13771313	ATG16L2	NM_033388	Body	72533295	72533418	NC_000011.9
cg02286091	5.76e-07	6.38e-10	7.77	12.3856	0.334	cg02286091	BHMT;BHMT	NM_001713;NM_001713	5'UTR;1stExon	78407678	78407801	NC_000005.9
cg06346138	5.89e-07	6.58e-10	7.76	12.3544	0.273	cg06346138	MST1P9	NR_002729	Body	17086071	17086194	NC_000001.10
cg23733123	5.89e-07	6.63e-10	7.76	12.3479	0.275	cg23733123	MARVELD1;MARVELD1	NM_031484;NR_026753	TSS1500;TSS1500	99472988	99473111	NC_000010.10
cg06942701	5.89e-07	6.63e-10	7.76	12.3478	0.236	cg06942701	TBR1	NM_006593	Body	162280009	162280132	NC_000002.11
cg00840332	5.93e-07	6.7e-10	7.76	12.3369	0.343	cg00840332	LEP	NM_000230	TSS200	127881269	127881392	NC_000007.13
cg14156751	5.94e-07	6.76e-10	7.76	12.3285	0.27	cg14156751				50976571	50976694	NC_000010.10
cg08199758	6.09e-07	7.02e-10	7.74	12.29	0.266	cg08199758	CLDN9	NM_020982	TSS200	3062426	3062549	NC_000016.9
cg04224064	6.16e-07	7.12e-10	7.74	12.277	0.345	cg04224064				36992233	36992356	NC_000014.8
cg07883457	6.24e-07	7.25e-10	7.73	12.2589	0.255	cg07883457				58147897	58148020	NC_000006.11
cg26852645	6.27e-07	7.35e-10	7.73	12.2447	0.315	cg26852645	LHPP;LHPP	NM_022126;NM_001167880	Body;Body	126278502	126278625	NC_000010.10
cg01407254	6.27e-07	7.35e-10	7.73	12.2446	0.303	cg01407254	DYSF;DYSF;DYSF;DYSF;DYSF;DYSF;DYSF;DYSF;DYSF;DYSF;DYSF;DYSF;DYSF;DYSF	NM_001130455;NM_001130979;NM_001130980;NM_001130982;NM_001130976;NM_001130987;NM_001130986;NM_001130981;NM_001130984;NM_001130983;NM_001130978;NM_001130985;NM_003494;NM_001130977	Body;Body;Body;Body;Body;Body;Body;Body;Body;Body;Body;Body;Body;Body	71787808	71787931	NC_000002.11
cg10031651	6.52e-07	7.66e-10	7.72	12.2036	0.211	cg10031651	LRRC2;TDGF1	NM_024750;NM_003212	TSS200;Body	46621686	46621809	NC_000003.11
cg16790794	6.68e-07	7.88e-10	7.71	12.1759	0.215	cg16790794	NKX2-1;NKX2-1	NM_003317;NM_001079668	Body;Body	36986996	36987119	NC_000014.8
cg20617583	6.68e-07	7.89e-10	7.71	12.1743	0.148	cg20617583	NRGN;NRGN	NM_006176;NM_001126181	TSS1500;TSS1500	124609317	124609440	NC_000011.9
cg19463256	6.7e-07	7.95e-10	7.71	12.1672	0.28	cg19463256	CCDC8	NM_032040	1stExon	46915351	46915474	NC_000019.9
cg11578064	6.71e-07	7.97e-10	7.71	12.164	0.296	cg11578064				112074044	112074167	NC_000012.11
cg22363327	6.72e-07	8e-10	7.71	12.1614	0.184	cg22363327	SFRS13B	NM_080743	TSS1500	89828097	89828220	NC_000006.11
cg06260709	6.78e-07	8.13e-10	7.7	12.1454	0.226	cg06260709				48626621	48626744	NC_000020.10
cg04074945	6.78e-07	8.13e-10	7.7	12.1445	0.308	cg04074945	PHF21A;PHF21A	NM_016621;NM_001101802	Body;Body	46071833	46071956	NC_000011.9
cg19022697	6.8e-07	8.18e-10	7.7	12.1393	0.307	cg19022697	TTC22	NM_001114108	Body	55247140	55247263	NC_000001.10
cg20441135	6.85e-07	8.25e-10	7.7	12.1303	0.337	cg20441135	CPEB3	NM_014912	Body	93999132	93999255	NC_000010.10
cg04149015	6.88e-07	8.3e-10	7.69	12.124	0.242	cg04149015	PRSS36	NM_173502	Body	31159854	31159977	NC_000016.9
cg26886462	6.89e-07	8.34e-10	7.69	12.1194	0.151	cg26886462				155108449	155108572	NC_000005.9
cg18675097	6.91e-07	8.38e-10	7.69	12.1149	0.368	cg18675097	NKAPL;NKAPL	NM_001007531;NM_001007531	5'UTR;1stExon	28227127	28227250	NC_000006.11
cg19635505	6.92e-07	8.43e-10	7.69	12.1085	0.278	cg19635505	KLHL33	NM_001109997	5'UTR	20903555	20903678	NC_000014.8
cg25464265	6.92e-07	8.45e-10	7.69	12.1068	0.247	cg25464265				221063484	221063607	NC_000001.10
cg24713204	6.98e-07	8.57e-10	7.69	12.0921	0.159	cg24713204	ZNF471	NM_020813	5'UTR	57019373	57019496	NC_000019.9
cg18746336	6.99e-07	8.6e-10	7.68	12.0894	0.241	cg18746336				128216122	128216245	NC_000003.11
cg23331484	7.02e-07	8.64e-10	7.68	12.0845	0.289	cg23331484	SLC7A10	NM_019849	TSS1500	33718148	33718271	NC_000019.9
cg02695062	7.03e-07	8.68e-10	7.68	12.08	0.158	cg02695062	DDR1;DDR1	NM_001954;NM_013993	TSS1500;TSS1500	30851417	30851540	NC_000006.11
cg22586996	7.04e-07	8.69e-10	7.68	12.0783	0.27	cg22586996	EBF1	NM_024007	Body	158523907	158524030	NC_000005.9
cg06636831	7.05e-07	8.73e-10	7.68	12.0744	0.183	cg06636831	CLEC3B	NM_003278	Body	45077369	45077492	NC_000003.11
cg04245294	7.08e-07	8.78e-10	7.68	12.0683	0.213	cg04245294				37898014	37898137	NC_000003.11
cg19839825	7.09e-07	8.81e-10	7.68	12.0647	0.293	cg19839825	PNPLA6;PNPLA6;PNPLA6;PNPLA6;PNPLA6	NM_001166114;NM_001166111;NM_006702;NM_001166113;NM_001166112	Body;Body;Body;Body;Body	7616011	7616134	NC_000019.9
cg08274637	7.09e-07	8.82e-10	7.68	12.0638	0.279	cg08274637	DLEU7	NM_198989	TSS200	51417923	51418046	NC_000013.10
cg05715532	7.12e-07	8.89e-10	7.67	12.0562	0.22	cg05715532	IHH	NM_002181	Body	219923682	219923805	NC_000002.11
cg19430694	7.12e-07	8.89e-10	7.67	12.0561	0.233	cg19430694	HEATR2	NM_017802	Body	811390	811513	NC_000007.13
cg05800416	7.17e-07	8.97e-10	7.67	12.0479	0.24	cg05800416	CSGALNACT1;CSGALNACT1;CSGALNACT1	NM_001130518;NR_024040;NM_018371	TSS200;Body;5'UTR	19460097	19460220	NC_000008.10
cg21144941	7.38e-07	9.28e-10	7.66	12.0141	0.336	cg21144941	CECR1;CECR1	NM_177405;NM_017424	TSS200;Body	17680575	17680698	NC_000022.10
cg11081894	7.41e-07	9.34e-10	7.66	12.0068	0.263	cg11081894				101283847	101283970	NC_000010.10
cg20763327	7.56e-07	9.6e-10	7.65	11.9796	0.3	cg20763327	MYO10	NM_012334	Body	16667384	16667507	NC_000005.9
cg00022997	7.56e-07	9.63e-10	7.65	11.9775	0.278	cg00022997				31650808	31650931	NC_000006.11
cg03229033	7.6e-07	9.71e-10	7.65	11.9688	0.139	cg03229033				146550796	146550919	NC_000001.10
cg17980283	7.76e-07	9.98e-10	7.64	11.9415	0.196	cg17980283				45156642	45156765	NC_000002.11
cg04295144	7.76e-07	1e-09	7.64	11.9397	0.353	cg04295144	ICAM5	NM_003259	Body	10407184	10407307	NC_000019.9
cg07503630	7.82e-07	1.01e-09	7.64	11.9296	0.173	cg07503630	ECEL1	NM_004826	5'UTR	233351564	233351687	NC_000002.11
cg14297867	7.89e-07	1.02e-09	7.63	11.918	0.199	cg14297867	MOBKL2B;IFNK	NM_024761;NM_020124	5'UTR;3'UTR	27526172	27526295	NC_000009.11
cg13283952	7.9e-07	1.03e-09	7.63	11.9138	0.364	cg13283952				121412005	121412128	NC_000002.11
cg22910462	7.96e-07	1.04e-09	7.63	11.8996	0.323	cg22910462	CECR1;CECR1	NM_177405;NM_017424	TSS200;Body	17680578	17680701	NC_000022.10
cg02493798	8.01e-07	1.05e-09	7.63	11.8918	0.239	cg02493798	ALOX12	NM_000697	Body	6899577	6899700	NC_000017.10
cg10403161	8.01e-07	1.05e-09	7.63	11.8897	0.203	cg10403161				93805870	93805993	NC_000010.10
cg21708058	8.12e-07	1.07e-09	7.62	11.8755	0.292	cg21708058	TACC1	NM_001146216	TSS200	38585602	38585725	NC_000008.10
cg04322572	8.13e-07	1.07e-09	7.62	11.872	0.281	cg04322572				43447618	43447741	NC_000010.10
cg23005885	8.16e-07	1.07e-09	7.62	11.8679	0.293	cg23005885	ZNF710	NM_198526	TSS1500	90543450	90543573	NC_000015.9
cg07663200	8.23e-07	1.09e-09	7.61	11.8527	0.0723	cg07663200				42030104	42030227	NC_000017.10
cg07790870	8.41e-07	1.12e-09	7.61	11.826	0.357	cg07790870	CBFA2T2;CBFA2T2;CBFA2T2;CBFA2T2;CBFA2T2	NM_001032999;NM_005093;NM_001039709;NM_001039709;NM_005093	Body;5'UTR;5'UTR;1stExon;1stExon	32150311	32150434	NC_000020.10
cg05150023	8.41e-07	1.12e-09	7.61	11.825	0.199	cg05150023				42944267	42944390	NC_000005.9
cg11303301	8.49e-07	1.14e-09	7.6	11.8114	0.178	cg11303301	ZC3H3	NM_015117	Body	144577185	144577308	NC_000008.10
cg18358869	8.5e-07	1.14e-09	7.6	11.8072	0.248	cg18358869				102808077	102808200	NC_000010.10
cg01067139	8.68e-07	1.17e-09	7.59	11.781	0.22	cg01067139				43000417	43000540	NC_000005.9
cg05476956	8.8e-07	1.19e-09	7.59	11.7664	0.157	cg05476956	PCDHB13	NM_018933	1stExon	140595291	140595414	NC_000005.9
cg02473600	8.82e-07	1.2e-09	7.59	11.7614	0.267	cg02473600				128173750	128173873	NC_000002.11
cg10702770	8.86e-07	1.21e-09	7.59	11.7538	0.207	cg10702770				39283780	39283903	NC_000001.10
cg13571460	8.92e-07	1.22e-09	7.58	11.744	0.244	cg13571460	LHX6;LHX6	NM_199160;NM_014368	Body;Body	124989337	124989460	NC_000009.11
cg19717326	8.98e-07	1.23e-09	7.58	11.7341	0.336	cg19717326	MYADM;MYADM;MYADM	NM_001020819;NM_138373;NM_001020820	TSS1500;TSS1500;5'UTR	54370016	54370139	NC_000019.9
cg17146731	9.06e-07	1.24e-09	7.58	11.7228	0.241	cg17146731	PTPN13;PTPN13;PTPN13;PTPN13	NM_006264;NM_080683;NM_080684;NM_080685	5'UTR;5'UTR;5'UTR;5'UTR	87517859	87517982	NC_000004.11
cg26036029	9.09e-07	1.25e-09	7.58	11.7181	0.371	cg26036029	HLA-DRB1	NM_002124	Body	32552443	32552566	NC_000006.11
cg15672768	9.17e-07	1.27e-09	7.57	11.7061	0.246	cg15672768	PCDHGA4;PCDHGA2;PCDHGB2;PCDHGA1;PCDHGB1;PCDHGA3;PCDHGB2	NM_018917;NM_018915;NM_018923;NM_018912;NM_018922;NM_018916;NM_032096	Body;Body;1stExon;Body;Body;Body;1stExon	140741220	140741343	NC_000005.9
cg09986680	9.17e-07	1.27e-09	7.57	11.7045	0.197	cg09986680				39737861	39737984	NC_000019.9
cg17508591	9.18e-07	1.27e-09	7.57	11.7019	0.214	cg17508591	PCDHA6;PCDHA2;PCDHA1;PCDHA7;PCDHA1;PCDHA6;PCDHA5;PCDHA3;PCDHA4;PCDHA7	NM_031849;NM_018905;NM_031411;NM_031852;NM_018900;NM_018909;NM_018908;NM_018906;NM_018907;NM_018910	Body;Body;Body;1stExon;Body;Body;Body;Body;Body;1stExon	140214138	140214261	NC_000005.9
cg16068038	9.41e-07	1.3e-09	7.56	11.6764	0.359	cg16068038	C15orf28;ANP32A	NR_026808;NM_006305	TSS1500;Body	69099678	69099801	NC_000015.9
cg17868307	9.46e-07	1.32e-09	7.56	11.6659	0.181	cg17868307	EIF4H;EIF4H	NM_022170;NM_031992	Body;Body	73597649	73597772	NC_000007.13
cg15556591	9.5e-07	1.32e-09	7.56	11.6606	0.221	cg15556591				1027967	1028090	NC_000004.11
cg06391982	9.56e-07	1.33e-09	7.56	11.6535	0.168	cg06391982				13936753	13936876	NC_000003.11
cg09317554	9.65e-07	1.35e-09	7.55	11.6398	0.26	cg09317554	LRBA;MAB21L2	NM_006726;NM_006439	Body;1stExon	151505084	151505207	NC_000004.11
cg22851420	9.71e-07	1.37e-09	7.55	11.6296	0.324	cg22851420	HPCAL4	NM_016257	Body	40149650	40149773	NC_000001.10
cg14117392	9.71e-07	1.37e-09	7.55	11.6291	0.198	cg14117392				139017942	139018065	NC_000005.9
cg07642463	9.77e-07	1.38e-09	7.55	11.6199	0.194	cg07642463	ZNF264	NM_003417	Body	57703860	57703983	NC_000019.9
cg13879455	9.82e-07	1.4e-09	7.54	11.608	0.274	cg13879455	AGAP2;AGAP2	NM_001122772;NM_014770	TSS1500;Body	58133008	58133131	NC_000012.11
cg17719099	9.82e-07	1.4e-09	7.54	11.6077	0.258	cg17719099	ARID1B;ARID1B;ARID1B	NM_017519;NM_175863;NM_020732	Body;Body;Body	157246895	157247018	NC_000006.11
cg15400101	9.86e-07	1.41e-09	7.54	11.6019	0.27	cg15400101	RASGEF1B	NM_152545	3'UTR	82348507	82348630	NC_000004.11
cg02646491	9.87e-07	1.41e-09	7.54	11.5983	0.296	cg02646491	KCNQ1DN	NR_024627	TSS1500	2890710	2890833	NC_000011.9
cg15444185	9.91e-07	1.42e-09	7.54	11.5898	0.261	cg15444185				67454707	67454830	NC_000008.10
cg01429449	9.93e-07	1.43e-09	7.54	11.5869	0.261	cg01429449				176936397	176936520	NC_000002.11
cg11960708	9.96e-07	1.43e-09	7.54	11.5819	0.231	cg11960708				26226256	26226379	NC_000006.11
cg08370178	1e-06	1.45e-09	7.53	11.574	0.253	cg08370178				43034043	43034166	NC_000005.9
cg24231854	1e-06	1.45e-09	7.53	11.5731	0.256	cg24231854				9235924	9236047	NC_000002.11
cg11351522	1e-06	1.45e-09	7.53	11.57	0.183	cg11351522	HIST1H4J	NM_021968	TSS1500	27791241	27791364	NC_000006.11
cg06238004	1.01e-06	1.48e-09	7.53	11.5532	0.287	cg06238004				42029727	42029850	NC_000017.10
cg21119375	1.01e-06	1.48e-09	7.53	11.5515	0.169	cg21119375				44393385	44393508	NC_000002.11
cg19718563	1.01e-06	1.48e-09	7.53	11.5508	0.24	cg19718563				37266748	37266871	NC_000019.9
cg19084726	1.01e-06	1.48e-09	7.53	11.5491	0.336	cg19084726	PDE4DIP	NM_022359	Body	145075538	145075661	NC_000001.10
cg27439480	1.01e-06	1.48e-09	7.53	11.5475	0.155	cg27439480				69999859	69999982	NC_000016.9
cg04354393	1.01e-06	1.49e-09	7.52	11.5442	0.214	cg04354393	SLFN13	NM_144682	TSS200	33775963	33776086	NC_000017.10
cg14429919	1.01e-06	1.49e-09	7.52	11.5442	0.387	cg14429919				3054820	3054943	NC_000006.11
cg04902474	1.01e-06	1.49e-09	7.52	11.5437	0.177	cg04902474	KIAA1522	NM_020888	Body	33233473	33233596	NC_000001.10
cg15818307	1.01e-06	1.5e-09	7.52	11.5404	0.349	cg15818307				29521430	29521553	NC_000006.11
cg12876356	1.01e-06	1.5e-09	7.52	11.5401	0.242	cg12876356	GFI1;GFI1;GFI1	NM_001127215;NM_001127216;NM_005263	Body;Body;Body	92946825	92946948	NC_000001.10
cg06878361	1.02e-06	1.51e-09	7.52	11.5277	0.148	cg06878361	ZNF577;ZNF577;ZNF577	NR_024181;NM_001135590;NM_032679	Body;5'UTR;5'UTR	52390810	52390933	NC_000019.9
cg11196788	1.02e-06	1.52e-09	7.52	11.5263	0.203	cg11196788	NUMA1	NM_006185	Body	71737549	71737672	NC_000011.9
cg03124514	1.03e-06	1.54e-09	7.52	11.514	0.248	cg03124514				42943857	42943980	NC_000005.9
cg16535144	1.03e-06	1.54e-09	7.51	11.5098	0.305	cg16535144				155259524	155259647	NC_000007.13
cg04702314	1.04e-06	1.55e-09	7.51	11.5069	0.319	cg04702314	VCL;VCL	NM_003373;NM_014000	Body;Body	75873408	75873531	NC_000010.10
cg24409808	1.05e-06	1.57e-09	7.51	11.4935	0.273	cg24409808	JMJD1C;JMJD1C	NM_032776;NM_004241	Body;Body	64957287	64957410	NC_000010.10
cg20124223	1.05e-06	1.59e-09	7.51	11.4828	0.231	cg20124223	DIXDC1;DIXDC1	NM_033425;NM_001037954	TSS1500;Body	111847692	111847815	NC_000011.9
cg07464571	1.06e-06	1.59e-09	7.51	11.4796	0.193	cg07464571	LEP	NM_000230	TSS1500	127881001	127881124	NC_000007.13
cg09522706	1.06e-06	1.59e-09	7.51	11.4792	0.143	cg09522706	MCM7;MCM7;MIR25;MIR93	NM_005916;NM_182776;NR_029498;NR_029510	Body;Body;TSS200;Body	99691447	99691570	NC_000007.13
cg01555352	1.07e-06	1.61e-09	7.5	11.4662	0.101	cg01555352	GAK	NM_005255	Body	860838	860961	NC_000004.11
cg11015251	1.07e-06	1.62e-09	7.5	11.4598	0.253	cg11015251	HOXA4	NM_002141	TSS200	27170554	27170677	NC_000007.13
cg17470251	1.07e-06	1.62e-09	7.5	11.4593	0.351	cg17470251	CSGALNACT1;CSGALNACT1;CSGALNACT1;CSGALNACT1	NM_001130518;NM_001130518;NR_024040;NM_018371	1stExon;5'UTR;Body;5'UTR	19459996	19460119	NC_000008.10
cg12348202	1.07e-06	1.63e-09	7.5	11.4549	0.193	cg12348202	PTPRN2;PTPRN2;PTPRN2	NM_130843;NM_130842;NM_002847	TSS1500;TSS1500;TSS1500	158381023	158381146	NC_000007.13
cg08651003	1.07e-06	1.63e-09	7.5	11.4536	0.222	cg08651003	GNB1	NM_002074	5'UTR	1758731	1758854	NC_000001.10
cg17204652	1.07e-06	1.64e-09	7.5	11.4512	0.248	cg17204652	ECEL1P2	NR_028501	TSS1500	233252706	233252829	NC_000002.11
cg05324393	1.08e-06	1.65e-09	7.49	11.4417	0.221	cg05324393				28922226	28922349	NC_000006.11
cg03309770	1.09e-06	1.66e-09	7.49	11.4362	0.224	cg03309770	FAM18A;FAM18A	NM_001079512;NM_001079512	1stExon;5'UTR	10912478	10912601	NC_000016.9
cg17266581	1.11e-06	1.7e-09	7.49	11.4143	0.3	cg17266581	MBP;MBP	NM_001025100;NM_001025101	Body;Body	74799572	74799695	NC_000018.9
cg07962882	1.11e-06	1.7e-09	7.49	11.4126	0.171	cg07962882	SBNO2;SBNO2	NM_001100122;NM_014963	Body;Body	1117289	1117412	NC_000019.9
cg16136290	1.11e-06	1.71e-09	7.48	11.4087	0.197	cg16136290	C1orf183;C1orf183	NM_198926;NM_019099	Body;Body	112280233	112280356	NC_000001.10
cg14590331	1.11e-06	1.71e-09	7.48	11.4086	0.169	cg14590331	CAMSAP1	NM_015447	Body	138782572	138782695	NC_000009.11
cg21109038	1.11e-06	1.71e-09	7.48	11.4064	0.257	cg21109038	ZNF710	NM_198526	TSS1500	90543610	90543733	NC_000015.9
cg03162916	1.11e-06	1.72e-09	7.48	11.4037	0.148	cg03162916	CANT1;CANT1;CANT1	NM_001159773;NM_001159772;NM_138793	5'UTR;5'UTR;5'UTR	77003152	77003275	NC_000017.10
cg20462493	1.11e-06	1.72e-09	7.48	11.4013	0.22	cg20462493				157340439	157340562	NC_000005.9
cg22715531	1.12e-06	1.74e-09	7.48	11.3916	0.242	cg22715531	LGR4	NM_018490	Body	27492378	27492501	NC_000011.9
cg12349580	1.14e-06	1.77e-09	7.47	11.3742	0.124	cg12349580	PLXNC1	NM_005761	Body	94681045	94681168	NC_000012.11
cg02462661	1.14e-06	1.77e-09	7.47	11.373	0.25	cg02462661	STOML1	NM_004809	3'UTR	74275622	74275745	NC_000015.9
cg03132824	1.14e-06	1.78e-09	7.47	11.3683	0.325	cg03132824	RGS12;RGS12;RGS12	NM_198229;NM_198227;NM_002926	Body;Body;Body	3373006	3373129	NC_000004.11
cg18023598	1.15e-06	1.8e-09	7.47	11.3557	0.177	cg18023598	HTR6	NM_000871	1stExon	19992504	19992627	NC_000001.10
cg09481121	1.15e-06	1.82e-09	7.47	11.3484	0.291	cg09481121	CMYA5	NM_153610	TSS1500	78985425	78985548	NC_000005.9
cg15390444	1.15e-06	1.82e-09	7.47	11.3451	0.197	cg15390444	BNIP3	NM_004052	Body	133793442	133793565	NC_000010.10
cg10906284	1.15e-06	1.82e-09	7.47	11.3448	0.254	cg10906284	AVPR1A	NM_000706	1stExon	63544430	63544553	NC_000012.11
cg10282491	1.16e-06	1.84e-09	7.46	11.3362	0.168	cg10282491	CLDN9	NM_020982	TSS200	3062368	3062491	NC_000016.9
cg00955780	1.16e-06	1.84e-09	7.46	11.335	0.201	cg00955780	SLC2A14	NM_153449	TSS1500	8025861	8025984	NC_000012.11
cg12071888	1.16e-06	1.85e-09	7.46	11.3302	0.368	cg12071888				91195159	91195282	NC_000001.10
cg11438310	1.16e-06	1.86e-09	7.46	11.3247	0.269	cg11438310	CMYA5	NM_153610	TSS1500	78985434	78985557	NC_000005.9
cg04386400	1.17e-06	1.88e-09	7.46	11.3136	0.294	cg04386400				31651158	31651281	NC_000006.11
cg07608826	1.18e-06	1.89e-09	7.45	11.308	0.273	cg07608826	EXOC4	NM_021807	Body	133589698	133589821	NC_000007.13
cg13408152	1.18e-06	1.89e-09	7.45	11.3068	0.161	cg13408152	FSTL1	NM_007085	TSS1500	120170474	120170597	NC_000003.11
cg21253335	1.18e-06	1.9e-09	7.45	11.305	0.251	cg21253335				87835928	87836051	NC_000005.9
cg13809915	1.18e-06	1.9e-09	7.45	11.3048	0.198	cg13809915				158789111	158789234	NC_000002.11
cg01284438	1.18e-06	1.9e-09	7.45	11.3027	0.17	cg01284438	CPLX2	NM_006650	5'UTR	175250977	175251100	NC_000005.9
cg05919982	1.18e-06	1.92e-09	7.45	11.2945	0.149	cg05919982	SBNO2;SBNO2	NM_001100122;NM_014963	Body;Body	1117571	1117694	NC_000019.9
cg21632158	1.18e-06	1.92e-09	7.45	11.294	0.304	cg21632158				29521356	29521479	NC_000006.11
cg11486078	1.18e-06	1.92e-09	7.45	11.2926	0.212	cg11486078				103981066	103981189	NC_000008.10
cg21237687	1.18e-06	1.92e-09	7.45	11.292	0.248	cg21237687	ALOX12	NM_000697	TSS200	6899380	6899503	NC_000017.10
cg09341491	1.18e-06	1.92e-09	7.45	11.2917	0.225	cg09341491	SNX20;SNX20;SNX20	NM_153337;NM_001144972;NM_182854	Body;Body;Body	50707795	50707918	NC_000016.9
cg06933824	1.18e-06	1.93e-09	7.45	11.2881	0.183	cg06933824	NEURL1B	NM_001142651	Body	172110579	172110702	NC_000005.9
cg11996592	1.18e-06	1.93e-09	7.45	11.2858	0.188	cg11996592	ZC3H3	NM_015117	Body	144577094	144577217	NC_000008.10
cg22399133	1.19e-06	1.94e-09	7.45	11.2809	0.462	cg22399133	CRYGD;CRYGD	NM_006891;NM_006891	1stExon;5'UTR	208989248	208989371	NC_000002.11
cg09510202	1.19e-06	1.95e-09	7.45	11.2764	0.366	cg09510202	PHACTR1	NM_030948	Body	13014871	13014994	NC_000006.11
cg26092675	1.19e-06	1.96e-09	7.44	11.2734	0.325	cg26092675	HIST1H3E	NM_003532	TSS200	26225258	26225381	NC_000006.11
cg07785717	1.2e-06	1.96e-09	7.44	11.27	0.217	cg07785717	CACNG8;MIR935	NM_031895;NR_030632	Body;TSS1500	54485321	54485444	NC_000019.9
cg22502448	1.2e-06	1.97e-09	7.44	11.269	0.185	cg22502448	ZNF167	NM_025169	Body	44622831	44622954	NC_000003.11
cg02366931	1.21e-06	1.99e-09	7.44	11.2549	0.291	cg02366931	CMYA5	NM_153610	Body	78986160	78986283	NC_000005.9
cg12003026	1.21e-06	2.01e-09	7.44	11.2478	0.181	cg12003026	HIST1H2BI	NM_003525	1stExon	26273370	26273493	NC_000006.11
cg25252197	1.22e-06	2.02e-09	7.43	11.2406	0.348	cg25252197	RBM20	NM_001134363	Body	112580109	112580232	NC_000010.10
cg20383521	1.22e-06	2.03e-09	7.43	11.2352	0.173	cg20383521	TUFT1;TUFT1	NM_001126337;NM_020127	3'UTR;3'UTR	151554824	151554947	NC_000001.10
cg10017626	1.23e-06	2.04e-09	7.43	11.2309	0.323	cg10017626				65085243	65085366	NC_000002.11
cg02377544	1.23e-06	2.06e-09	7.43	11.2242	0.208	cg02377544	MEIS2;MEIS2;MEIS2;MEIS2;MEIS2;MEIS2;MEIS2	NM_172316;NM_170674;NM_170675;NM_172315;NM_002399;NM_170677;NM_170676	Body;Body;Body;Body;Body;Body;Body	37388359	37388482	NC_000015.9
cg02936049	1.23e-06	2.06e-09	7.43	11.2225	0.292	cg02936049	ZBTB38	NM_001080412	5'UTR	141102599	141102722	NC_000003.11
cg07021644	1.24e-06	2.07e-09	7.43	11.2169	0.283	cg07021644	UPK3A;UPK3A;UPK3A;UPK3A	NM_006953;NM_006953;NM_001167574;NM_001167574	1stExon;5'UTR;1stExon;5'UTR	45680879	45681002	NC_000022.10
cg01097384	1.25e-06	2.1e-09	7.42	11.2046	0.311	cg01097384				1358675	1358798	NC_000011.9
cg15934958	1.25e-06	2.1e-09	7.42	11.2026	0.301	cg15934958	LRRFIP2;LRRFIP2;LRRFIP2	NM_017724;NM_006309;NM_001134369	5'UTR;5'UTR;5'UTR	37212084	37212207	NC_000003.11
cg01228134	1.27e-06	2.15e-09	7.42	11.1797	0.22	cg01228134	ECEL1	NM_004826	5'UTR	233351921	233352044	NC_000002.11
cg27597505	1.27e-06	2.15e-09	7.42	11.1787	0.279	cg27597505				54148217	54148340	NC_000012.11
cg11730661	1.27e-06	2.16e-09	7.42	11.1747	0.197	cg11730661	REXO1	NM_020695	Body	1844074	1844197	NC_000019.9
cg02360199	1.27e-06	2.16e-09	7.42	11.1746	0.0977	cg02360199				103674159	103674282	NC_000014.8
cg01722932	1.28e-06	2.18e-09	7.41	11.1676	0.134	cg01722932	MTNR1B	NM_005959	TSS200	92702653	92702776	NC_000011.9
cg26758131	1.28e-06	2.18e-09	7.41	11.1664	0.283	cg26758131	ARID5B	NM_032199	Body	63671403	63671526	NC_000010.10
cg26365545	1.28e-06	2.19e-09	7.41	11.1633	0.305	cg26365545	OTP	NM_032109	Body	76932016	76932139	NC_000005.9
cg19875532	1.28e-06	2.2e-09	7.41	11.1588	0.269	cg19875532	VENTX	NM_014468	Body	135052004	135052127	NC_000010.10
cg11967480	1.28e-06	2.2e-09	7.41	11.156	0.291	cg11967480				112290198	112290321	NC_000010.10
cg05794117	1.28e-06	2.21e-09	7.41	11.1535	0.227	cg05794117	OBSCN;OBSCN	NM_052843;NM_001098623	TSS1500;TSS1500	228394559	228394682	NC_000001.10
cg02056062	1.31e-06	2.26e-09	7.4	11.1308	0.133	cg02056062	WWTR1;WWTR1;WWTR1	NM_015472;NM_001168278;NM_001168280	Body;Body;Body	149374914	149375037	NC_000003.11
cg22167515	1.31e-06	2.28e-09	7.4	11.1235	0.328	cg22167515				91192466	91192589	NC_000001.10
cg09858188	1.32e-06	2.3e-09	7.4	11.1155	0.412	cg09858188				156814480	156814603	NC_000007.13
cg14243778	1.32e-06	2.3e-09	7.4	11.1155	0.322	cg14243778	CNTN1;CNTN1	NM_175038;NM_001843	5'UTR;5'UTR	41086879	41087002	NC_000012.11
cg10388456	1.32e-06	2.3e-09	7.4	11.1139	0.123	cg10388456	RSPH10B;RSPH10B2	NM_173565;NM_001099697	5'UTR;5'UTR	6793823	6793946	NC_000007.13
cg06315439	1.33e-06	2.32e-09	7.4	11.1063	0.204	cg06315439				47448633	47448756	NC_000017.10
cg02677388	1.33e-06	2.33e-09	7.39	11.1022	0.157	cg02677388	HIST1H3C	NM_003531	1stExon	26045788	26045911	NC_000006.11
cg05154546	1.34e-06	2.36e-09	7.39	11.0899	0.198	cg05154546	RGS12;RGS12;RGS12	NM_198229;NM_198227;NM_002926	Body;Body;Body	3373555	3373678	NC_000004.11
cg05592035	1.36e-06	2.38e-09	7.39	11.0782	0.257	cg05592035	CD300A	NM_007261	Body	72462984	72463107	NC_000017.10
cg10473369	1.36e-06	2.39e-09	7.39	11.0766	0.205	cg10473369	SOX15	NM_006942	Body	7492352	7492475	NC_000017.10
cg14398214	1.37e-06	2.41e-09	7.38	11.0686	0.278	cg14398214	RNF43	NM_017763	5'UTR	56493260	56493383	NC_000017.10
cg00979931	1.37e-06	2.43e-09	7.38	11.0589	0.138	cg00979931	ATG16L2	NM_033388	Body	72533664	72533787	NC_000011.9
cg04575202	1.37e-06	2.44e-09	7.38	11.0562	0.258	cg04575202				9235972	9236095	NC_000002.11
cg06268694	1.38e-06	2.44e-09	7.38	11.0547	0.307	cg06268694	CELSR1	NM_014246	1stExon	46932642	46932765	NC_000022.10
cg15188252	1.38e-06	2.46e-09	7.38	11.0483	0.218	cg15188252				43000612	43000735	NC_000005.9
cg11793699	1.38e-06	2.47e-09	7.38	11.0444	0.385	cg11793699	NTRK1;INSRR	NM_001007792;NM_014215	Body;Body	156814901	156815024	NC_000001.10
cg01944848	1.39e-06	2.49e-09	7.37	11.0359	0.129	cg01944848				55368122	55368245	NC_000002.11
cg14504586	1.39e-06	2.49e-09	7.37	11.0337	0.128	cg14504586	MED27	NM_004269	Body	134744872	134744995	NC_000009.11
cg17991206	1.39e-06	2.5e-09	7.37	11.0307	0.166	cg17991206	RNASET2	NM_003730	Body	167366683	167366806	NC_000006.11
cg03731458	1.4e-06	2.51e-09	7.37	11.0284	0.255	cg03731458	CUGBP2;CUGBP2;CUGBP2;CUGBP2	NM_001025076;NM_006561;NM_001025077;NM_001083591	Body;Body;Body;Body	11246763	11246886	NC_000010.10
cg09096555	1.4e-06	2.51e-09	7.37	11.0276	0.201	cg09096555	GRIN2C	NM_000835	Body	72848358	72848481	NC_000017.10
cg07317017	1.41e-06	2.54e-09	7.37	11.0156	0.172	cg07317017	LOXL1	NM_005576	TSS200	74218715	74218838	NC_000015.9
cg00158122	1.41e-06	2.56e-09	7.37	11.0064	0.146	cg00158122				101290029	101290152	NC_000010.10
cg01139699	1.41e-06	2.56e-09	7.37	11.0063	0.295	cg01139699				49277592	49277715	NC_000015.9
cg26924825	1.41e-06	2.57e-09	7.37	11.0027	0.197	cg26924825	SLC12A4;SLC12A4;SLC12A4;LCAT;SLC12A4;SLC12A4	NM_001145962;NM_005072;NM_001145963;NM_000229;NM_001145961;NM_001145964	3'UTR;3'UTR;3'UTR;1stExon;3'UTR;3'UTR	67977865	67977988	NC_000016.9
cg03760483	1.45e-06	2.64e-09	7.36	10.9762	0.219	cg03760483	ALOX12	NM_000697	TSS200	6899297	6899420	NC_000017.10
cg04745384	1.46e-06	2.66e-09	7.36	10.9695	0.0659	cg04745384				52242468	52242591	NC_000012.11
cg02637352	1.47e-06	2.7e-09	7.35	10.9543	0.348	cg02637352	FLJ41603	NM_001001669	5'UTR	148961536	148961659	NC_000005.9
cg06938705	1.48e-06	2.73e-09	7.35	10.9434	0.165	cg06938705				30095281	30095404	NC_000006.11
cg24748945	1.49e-06	2.75e-09	7.35	10.936	0.112	cg24748945	MAP2K2	NM_030662	1stExon	4123852	4123975	NC_000019.9
cg07352544	1.5e-06	2.77e-09	7.34	10.9308	0.156	cg07352544	SEPN1;SEPN1	NM_020451;NM_206926	TSS1500;TSS1500	26126233	26126356	NC_000001.10
cg14707231	1.5e-06	2.78e-09	7.34	10.9249	0.284	cg14707231				43001138	43001261	NC_000005.9
cg00931644	1.52e-06	2.83e-09	7.34	10.9083	0.432	cg00931644	KCTD12	NM_138444	TSS1500	77461368	77461491	NC_000013.10
cg17804723	1.53e-06	2.85e-09	7.34	10.9015	0.179	cg17804723				114300030	114300153	NC_000002.11
cg21912308	1.54e-06	2.86e-09	7.33	10.8962	0.312	cg21912308	PRAF2	NM_007213	Body	48929987	48930110	NC_000023.10
cg10553204	1.54e-06	2.87e-09	7.33	10.8937	0.328	cg10553204	GDF7	NM_182828	3'UTR	20871195	20871318	NC_000002.11
cg25968569	1.54e-06	2.88e-09	7.33	10.8917	0.405	cg25968569	KCTD12	NM_138444	TSS1500	77461335	77461458	NC_000013.10
cg06134471	1.54e-06	2.88e-09	7.33	10.8906	0.24	cg06134471	TRIM9;TRIM9	NM_015163;NM_052978	Body;Body	51560134	51560257	NC_000014.8
cg12812233	1.54e-06	2.89e-09	7.33	10.8864	0.303	cg12812233	NSUN7	NM_024677	Body	40752838	40752961	NC_000004.11
cg01895439	1.55e-06	2.91e-09	7.33	10.8794	0.101	cg01895439	ANKRD9	NM_152326	5'UTR	102974240	102974363	NC_000014.8
cg06942814	1.56e-06	2.95e-09	7.33	10.8685	0.211	cg06942814	HOXA4	NM_002141	TSS1500	27170819	27170942	NC_000007.13
cg16298547	1.57e-06	2.98e-09	7.32	10.8581	0.242	cg16298547	ELOVL7;ELOVL7	NM_024930;NM_001104558	5'UTR;5'UTR	60138761	60138884	NC_000005.9
cg00062245	1.57e-06	2.98e-09	7.32	10.8564	0.22	cg00062245	ITGA2B	NM_000419	Body	42462260	42462383	NC_000017.10
cg07943461	1.58e-06	3.01e-09	7.32	10.8471	0.249	cg07943461				32605243	32605366	NC_000015.9
cg11345955	1.58e-06	3.01e-09	7.32	10.847	0.151	cg11345955	AKAP13;AKAP13	NM_007200;NM_006738	Body;Body	86086674	86086797	NC_000015.9
cg14632507	1.58e-06	3.02e-09	7.32	10.8425	0.278	cg14632507	PDZRN3	NM_015009	Body	73468875	73468998	NC_000003.11
cg05532178	1.58e-06	3.03e-09	7.32	10.8419	0.234	cg05532178	HKDC1	NM_025130	TSS1500	70979827	70979950	NC_000010.10
cg01838004	1.59e-06	3.05e-09	7.32	10.8343	0.296	cg01838004	KIAA1529	NM_020893	Body	100070007	100070130	NC_000009.11
cg18224262	1.61e-06	3.08e-09	7.31	10.823	0.202	cg18224262				56436255	56436378	NC_000018.9
cg02852670	1.62e-06	3.1e-09	7.31	10.8165	0.314	cg02852670	KLHL33	NM_001109997	5'UTR	20903410	20903533	NC_000014.8
cg04157138	1.62e-06	3.11e-09	7.31	10.815	0.171	cg04157138				58331898	58332021	NC_000014.8
cg18272461	1.62e-06	3.13e-09	7.31	10.8088	0.182	cg18272461	AGRN	NM_198576	Body	960761	960884	NC_000001.10
cg04191427	1.63e-06	3.15e-09	7.31	10.8034	0.388	cg04191427	RPTOR;RPTOR	NM_001163034;NM_020761	Body;Body	78833259	78833382	NC_000017.10
cg17241776	1.63e-06	3.16e-09	7.31	10.7999	0.333	cg17241776	DLEU7	NM_198989	1stExon	51417469	51417592	NC_000013.10
cg26194475	1.63e-06	3.16e-09	7.3	10.7976	0.209	cg26194475				94455895	94456018	NC_000010.10
cg08884539	1.64e-06	3.17e-09	7.3	10.796	0.122	cg08884539	TSPAN9;TSPAN9	NM_006675;NM_001168320	Body;Body	3361725	3361848	NC_000012.11
cg24394172	1.65e-06	3.21e-09	7.3	10.7823	0.248	cg24394172	GABRA4	NM_000809	Body	46995203	46995326	NC_000004.11
cg19821713	1.65e-06	3.23e-09	7.3	10.7785	0.225	cg19821713				96909816	96909939	NC_000015.9
cg16052975	1.65e-06	3.23e-09	7.3	10.7764	0.247	cg16052975				15821016	15821139	NC_000017.10
cg20248204	1.65e-06	3.24e-09	7.3	10.7744	0.212	cg20248204	KCTD12	NM_138444	TSS1500	77461279	77461402	NC_000013.10
cg10783149	1.66e-06	3.25e-09	7.3	10.7721	0.235	cg10783149				55707866	55707989	NC_000014.8
cg03404566	1.67e-06	3.3e-09	7.29	10.7569	0.225	cg03404566	ALOX12	NM_000697	TSS200	6899310	6899433	NC_000017.10
cg17916432	1.69e-06	3.33e-09	7.29	10.7462	0.163	cg17916432	CRYGD;CRYGD	NM_006891;NM_006891	1stExon;5'UTR	208989209	208989332	NC_000002.11
cg11988910	1.7e-06	3.36e-09	7.29	10.7369	0.221	cg11988910				101286538	101286661	NC_000010.10
cg26256793	1.7e-06	3.37e-09	7.29	10.7359	0.216	cg26256793	COL11A1;COL11A1;COL11A1;COL11A1	NM_001168249;NM_080629;NM_080630;NM_001854	TSS1500;TSS1500;TSS1500;TSS1500	103574469	103574592	NC_000001.10
cg26785230	1.71e-06	3.4e-09	7.28	10.7263	0.05	cg26785230	FAM96B;CES2;FAM96B;CES2	NR_024525;NM_003869;NM_016062;NM_198061	TSS1500;Body;TSS1500;Body	66969735	66969858	NC_000016.9
cg01352108	1.72e-06	3.42e-09	7.28	10.7194	0.183	cg01352108	KCNK4;KCNK4	NM_033310;NM_033310	5'UTR;1stExon	64058878	64059001	NC_000011.9
cg01410359	1.73e-06	3.46e-09	7.28	10.7081	0.17	cg01410359	CYP1B1	NM_000104	Body	38302230	38302353	NC_000002.11
cg14980255	1.74e-06	3.5e-09	7.28	10.6982	0.167	cg14980255	MEIS2;MEIS2;MEIS2;MEIS2;MEIS2;MEIS2;MEIS2	NM_172316;NM_170674;NM_170675;NM_172315;NM_002399;NM_170677;NM_170676	Body;Body;Body;Body;Body;Body;Body	37190694	37190817	NC_000015.9
cg19802639	1.75e-06	3.51e-09	7.27	10.6938	0.153	cg19802639	CBX6	NM_014292	Body	39263202	39263325	NC_000022.10
cg21908235	1.76e-06	3.54e-09	7.27	10.6855	0.376	cg21908235				146551744	146551867	NC_000001.10
cg04665423	1.76e-06	3.56e-09	7.27	10.6822	0.103	cg04665423	VENTX	NM_014468	TSS200	135051305	135051428	NC_000010.10
cg13407335	1.77e-06	3.58e-09	7.27	10.6743	0.328	cg13407335	KCNAB3	NM_004732	TSS200	7832852	7832975	NC_000017.10
cg22934200	1.78e-06	3.6e-09	7.27	10.6705	0.287	cg22934200	AHSA2	NM_152392	5'UTR	61407270	61407393	NC_000002.11
cg16391678	1.78e-06	3.61e-09	7.27	10.6659	0.183	cg16391678	ITGAL;ITGAL	NM_002209;NM_001114380	Body;Body	30485597	30485720	NC_000016.9
cg20408776	1.79e-06	3.65e-09	7.26	10.6553	0.281	cg20408776	FMNL1	NM_005892	Body	43319382	43319505	NC_000017.10
cg22332066	1.8e-06	3.67e-09	7.26	10.6495	0.296	cg22332066	HHAT;HHAT;HHAT;HHAT;HHAT;HHAT;HHAT;HHAT	NM_001170580;NM_018194;NM_001170564;NM_001170564;NM_001170588;NM_001122834;NM_001122834;NM_001170587	TSS1500;TSS1500;1stExon;5'UTR;TSS1500;1stExon;5'UTR;TSS1500	210501621	210501744	NC_000001.10
cg25555505	1.8e-06	3.68e-09	7.26	10.6474	0.167	cg25555505	FOXK1	NM_001037165	Body	4791054	4791177	NC_000007.13
cg01355757	1.8e-06	3.68e-09	7.26	10.6467	0.302	cg01355757	TET3	NM_144993	TSS1500	74272773	74272896	NC_000002.11
cg01746241	1.8e-06	3.69e-09	7.26	10.6454	0.25	cg01746241	KIAA1161	NM_020702	Body	34370835	34370958	NC_000009.11
cg19577671	1.8e-06	3.7e-09	7.26	10.6418	0.253	cg19577671				42782524	42782647	NC_000019.9
cg09867953	1.8e-06	3.71e-09	7.26	10.6401	0.155	cg09867953	ERN2	NM_033266	Body	23706666	23706789	NC_000016.9
cg09062550	1.82e-06	3.75e-09	7.26	10.63	0.367	cg09062550	INSM1;INSM1	NM_002196;NM_002196	1stExon;3'UTR	20350481	20350604	NC_000020.10
cg06476685	1.83e-06	3.78e-09	7.25	10.6222	0.272	cg06476685	ANKMY1;ANKMY1	NM_017844;NM_016552	Body;Body	241459638	241459761	NC_000002.11
cg03893872	1.83e-06	3.78e-09	7.25	10.6216	0.316	cg03893872	HHAT;HHAT;HHAT;HHAT;HHAT;HHAT;HHAT;HHAT	NM_001170580;NM_018194;NM_001170564;NM_001170564;NM_001170588;NM_001122834;NM_001122834;NM_001170587	TSS1500;TSS1500;1stExon;5'UTR;TSS1500;1stExon;5'UTR;TSS1500	210501634	210501757	NC_000001.10
cg11540476	1.89e-06	3.93e-09	7.24	10.5822	0.33	cg11540476				31651249	31651372	NC_000006.11
cg22762813	1.9e-06	3.95e-09	7.24	10.5789	0.148	cg22762813				65196614	65196737	NC_000007.13
cg19921377	1.9e-06	3.95e-09	7.24	10.5772	0.29	cg19921377	ZNF358	NM_018083	TSS1500	7580209	7580332	NC_000019.9
cg05584759	1.92e-06	4.01e-09	7.24	10.5629	0.235	cg05584759	ARHGAP9;ARHGAP9;ARHGAP9	NM_032496;NM_001080156;NM_001080157	Body;Body;Body	57869421	57869544	NC_000012.11
cg14851325	1.93e-06	4.04e-09	7.23	10.556	0.174	cg14851325	PBX2	NM_002586	Body	32156100	32156223	NC_000006.11
cg08620329	1.93e-06	4.04e-09	7.23	10.5549	0.316	cg08620329				67454546	67454669	NC_000008.10
cg07241917	1.94e-06	4.06e-09	7.23	10.5502	0.203	cg07241917				221069699	221069822	NC_000001.10
cg25341032	1.95e-06	4.1e-09	7.23	10.5411	0.313	cg25341032	ADD3	NM_019903	5'UTR	111766049	111766172	NC_000010.10
cg23933241	1.95e-06	4.1e-09	7.23	10.5407	0.254	cg23933241	SLFN12L	NM_001145027	Body	33823690	33823813	NC_000017.10
cg04065964	1.96e-06	4.12e-09	7.23	10.5353	0.163	cg04065964				81160426	81160549	NC_000005.9
cg23574802	1.96e-06	4.14e-09	7.23	10.5316	0.119	cg23574802	PTPN21	NM_007039	5'UTR	89017726	89017849	NC_000014.8
cg23471067	1.96e-06	4.15e-09	7.23	10.5278	0.225	cg23471067	BNIP3	NM_004052	Body	133793477	133793600	NC_000010.10
cg05717794	1.97e-06	4.18e-09	7.22	10.5221	0.203	cg05717794	SLFN12L	NM_001145027	Body	33822621	33822744	NC_000017.10
cg09223687	1.98e-06	4.2e-09	7.22	10.5166	0.252	cg09223687				1027885	1028008	NC_000004.11
cg26492368	1.98e-06	4.2e-09	7.22	10.5166	0.299	cg26492368	SPAG6;SPAG6	NM_012443;NM_172242	Body;Body	22634733	22634856	NC_000010.10
cg07333191	2e-06	4.25e-09	7.22	10.5056	0.321	cg07333191				13526769	13526892	NC_000004.11
cg26910511	2.01e-06	4.27e-09	7.22	10.5016	0.219	cg26910511	LRFN1	NM_020862	Body	39799037	39799160	NC_000019.9
cg16430687	2.04e-06	4.37e-09	7.21	10.4776	0.255	cg16430687	PROCR	NM_006404	Body	33762474	33762597	NC_000020.10
cg25738176	2.04e-06	4.37e-09	7.21	10.4767	0.205	cg25738176	ATP2A3;ATP2A3;ATP2A3;ATP2A3;ATP2A3;ATP2A3;ATP2A3	NM_174954;NM_174955;NM_174956;NM_174957;NM_174953;NM_174958;NM_005173	Body;Body;Body;Body;Body;Body;Body	3848506	3848629	NC_000017.10
cg21054521	2.06e-06	4.42e-09	7.21	10.4666	0.307	cg21054521				112759386	112759509	NC_000013.10
cg00102731	2.07e-06	4.43e-09	7.21	10.4632	0.216	cg00102731	EBF4	NM_001110514	Body	2729245	2729368	NC_000020.10
cg17596249	2.08e-06	4.46e-09	7.21	10.4577	0.323	cg17596249	ARID1B;ARID1B;ARID1B	NM_017519;NM_175863;NM_020732	Body;Body;Body	157493773	157493896	NC_000006.11
cg09765089	2.08e-06	4.46e-09	7.21	10.4569	0.352	cg09765089				27291346	27291469	NC_000007.13
cg14807565	2.09e-06	4.5e-09	7.2	10.4479	0.2	cg14807565				94179972	94180095	NC_000010.10
cg05260085	2.09e-06	4.51e-09	7.2	10.4466	0.166	cg05260085	FLJ40125	NM_001080401	Body	46003095	46003218	NC_000019.9
cg10888242	2.1e-06	4.52e-09	7.2	10.4435	0.181	cg10888242	SAMD4A;SAMD4A	NM_001161576;NM_015589	Body;Body	55138530	55138653	NC_000014.8
cg00356361	2.1e-06	4.53e-09	7.2	10.4411	0.203	cg00356361	NFATC1;NFATC1;NFATC1;NFATC1	NM_006162;NM_172388;NM_172389;NM_172387	Body;Body;Body;Body	77286260	77286383	NC_000018.9
cg08637618	2.12e-06	4.58e-09	7.2	10.4307	0.296	cg08637618				27279329	27279452	NC_000007.13
cg01985482	2.14e-06	4.63e-09	7.19	10.4212	0.196	cg01985482	NDUFA7	NM_005001	3'UTR	8376374	8376497	NC_000019.9
cg05825244	2.15e-06	4.67e-09	7.19	10.412	0.397	cg05825244	EBF4	NM_001110514	Body	2730488	2730611	NC_000020.10
cg19442201	2.16e-06	4.69e-09	7.19	10.4081	0.172	cg19442201				40572550	40572673	NC_000015.9
cg04715503	2.18e-06	4.75e-09	7.19	10.3945	0.278	cg04715503	CLDN9;CLDN9	NM_020982;NM_020982	1stExon;5'UTR	3062795	3062918	NC_000016.9
cg02049405	2.18e-06	4.76e-09	7.19	10.3922	0.268	cg02049405				30095265	30095388	NC_000006.11
cg13412754	2.21e-06	4.84e-09	7.18	10.3756	0.244	cg13412754	MAPKAP1;MAPKAP1;MAPKAP1;MAPKAP1;MAPKAP1;MAPKAP1	NM_024117;NM_001006620;NM_001006618;NM_001006617;NM_001006621;NM_001006619	Body;Body;Body;Body;Body;Body	128307578	128307701	NC_000009.11
cg24942416	2.22e-06	4.86e-09	7.18	10.3719	0.211	cg24942416	VSIG2	NM_014312	Body	124621829	124621952	NC_000011.9
cg09613495	2.22e-06	4.86e-09	7.18	10.3715	0.176	cg09613495	GUCA1A	NM_000409	Body	42145851	42145974	NC_000006.11
cg22234712	2.22e-06	4.87e-09	7.18	10.3714	0.276	cg22234712				96085385	96085508	NC_000008.10
cg02156296	2.22e-06	4.88e-09	7.18	10.3679	0.23	cg02156296				36806414	36806537	NC_000022.10
cg03444722	2.22e-06	4.9e-09	7.18	10.3637	0.28	cg03444722				112375854	112375977	NC_000002.11
cg07886195	2.22e-06	4.91e-09	7.18	10.3621	0.352	cg07886195	SPC24	NM_182513	Body	11263615	11263738	NC_000019.9
cg07575466	2.23e-06	4.92e-09	7.18	10.3606	0.232	cg07575466	COL9A2	NM_001852	Body	40769708	40769831	NC_000001.10
cg19863595	2.23e-06	4.92e-09	7.18	10.3594	0.187	cg19863595	AMDHD1	NM_152435	Body	96350605	96350728	NC_000012.11
cg19153828	2.23e-06	4.94e-09	7.18	10.3561	0.208	cg19153828				127782651	127782774	NC_000002.11
cg08023416	2.23e-06	4.95e-09	7.18	10.3543	0.204	cg08023416	IL1RL2	NM_003854	5'UTR	102803787	102803910	NC_000002.11
cg20265748	2.23e-06	4.95e-09	7.17	10.3534	0.208	cg20265748	PTPN21	NM_007039	5'UTR	89017615	89017738	NC_000014.8
cg06999856	2.24e-06	4.98e-09	7.17	10.3474	0.163	cg06999856				135260170	135260293	NC_000010.10
cg10257870	2.24e-06	5e-09	7.17	10.3453	0.304	cg10257870	CMYA5	NM_153610	TSS200	78985484	78985607	NC_000005.9
cg21617353	2.24e-06	5e-09	7.17	10.3446	0.259	cg21617353	FMNL1	NM_005892	Body	43319371	43319494	NC_000017.10
cg27392775	2.24e-06	5.03e-09	7.17	10.3379	0.242	cg27392775	ADIPOR1;ADIPOR1	NM_015999;NM_001127687	5'UTR;5'UTR	202924293	202924416	NC_000001.10
cg03729251	2.24e-06	5.03e-09	7.17	10.3377	0.291	cg03729251	LRBA	NM_006726	Body	151501035	151501158	NC_000004.11
cg20435535	2.24e-06	5.04e-09	7.17	10.3364	0.278	cg20435535				31651151	31651274	NC_000006.11
cg00970396	2.24e-06	5.04e-09	7.17	10.3362	0.371	cg00970396				9107199	9107322	NC_000016.9
cg21683069	2.24e-06	5.04e-09	7.17	10.3355	0.305	cg21683069				147781600	147781723	NC_000001.10
cg27367170	2.25e-06	5.05e-09	7.17	10.3338	0.296	cg27367170	NET1;NET1;NET1	NM_001047160;NM_005863;NM_005863	Body;5'UTR;1stExon	5488628	5488751	NC_000010.10
cg17261676	2.26e-06	5.09e-09	7.17	10.326	0.282	cg17261676				26016808	26016931	NC_000006.11
cg12325536	2.29e-06	5.19e-09	7.16	10.3077	0.277	cg12325536	LOC645323;LOC645323;LOC645323	NR_024383;NR_015436;NR_024384	Body;Body;Body	87968658	87968781	NC_000005.9
cg25348105	2.29e-06	5.19e-09	7.16	10.3075	0.216	cg25348105	BAHCC1	NM_001080519	Body	79393718	79393841	NC_000017.10
cg03520644	2.29e-06	5.19e-09	7.16	10.3075	0.32	cg03520644	COL11A1;COL11A1;COL11A1;COL11A1	NM_001168249;NM_080629;NM_080630;NM_001854	TSS1500;TSS1500;TSS1500;TSS1500	103574523	103574646	NC_000001.10
cg09907509	2.29e-06	5.2e-09	7.16	10.3052	0.25	cg09907509	C13orf36;C13orf36	NM_203451;NM_203451	5'UTR;1stExon	37248244	37248367	NC_000013.10
cg05923226	2.29e-06	5.2e-09	7.16	10.3048	0.197	cg05923226	CCDC105	NM_173482	TSS200	15121516	15121639	NC_000019.9
cg07016556	2.31e-06	5.24e-09	7.16	10.2972	0.252	cg07016556	BAHCC1	NM_001080519	Body	79393532	79393655	NC_000017.10
cg24928110	2.33e-06	5.31e-09	7.15	10.2846	0.21	cg24928110				96085448	96085571	NC_000008.10
cg21843594	2.34e-06	5.33e-09	7.15	10.2805	0.211	cg21843594	HORMAD2	NM_152510	TSS200	30476285	30476408	NC_000022.10
cg02578944	2.34e-06	5.34e-09	7.15	10.2796	0.334	cg02578944	NKAPL	NM_001007531	1stExon	28227392	28227515	NC_000006.11
cg20065463	2.35e-06	5.39e-09	7.15	10.2692	0.31	cg20065463	DES;DES	NM_001927;NM_001927	1stExon;5'UTR	220283156	220283279	NC_000002.11
cg19332452	2.36e-06	5.41e-09	7.15	10.2663	0.133	cg19332452	RTBDN;RTBDN	NM_001080997;NM_031429	Body;Body	12936719	12936842	NC_000019.9
cg08655206	2.39e-06	5.49e-09	7.15	10.252	0.232	cg08655206	HLX	NM_021958	3'UTR	221058198	221058321	NC_000001.10
cg26770907	2.41e-06	5.56e-09	7.14	10.2385	0.183	cg26770907				48844808	48844931	NC_000016.9
cg03323462	2.41e-06	5.57e-09	7.14	10.2378	0.307	cg03323462				35300677	35300800	NC_000017.10
cg23404330	2.41e-06	5.58e-09	7.14	10.236	0.301	cg23404330				80251639	80251762	NC_000017.10
cg05962092	2.42e-06	5.61e-09	7.14	10.2305	0.256	cg05962092	KCNA7	NM_031886	1stExon	49575664	49575787	NC_000019.9
cg08305436	2.44e-06	5.66e-09	7.14	10.2207	0.247	cg08305436				22806184	22806307	NC_000019.9
cg02049333	2.44e-06	5.68e-09	7.14	10.2182	0.235	cg02049333				5851757	5851880	NC_000006.11
cg26820037	2.45e-06	5.7e-09	7.13	10.2144	0.265	cg26820037	FGF8;FGF8;FGF8;FGF8	NM_033164;NM_033165;NM_033163;NM_006119	Body;Body;Body;Body	103534501	103534624	NC_000010.10
cg23691894	2.46e-06	5.74e-09	7.13	10.2076	0.31	cg23691894	ADD3;ADD3	NM_019903;NM_019903	1stExon;5'UTR	111765904	111766027	NC_000010.10
cg24921186	2.47e-06	5.77e-09	7.13	10.2023	0.133	cg24921186	LOC153684	NR_015447	Body	43045001	43045124	NC_000005.9
cg21263664	2.47e-06	5.78e-09	7.13	10.2005	0.262	cg21263664				146549909	146550032	NC_000001.10
cg09037777	2.47e-06	5.81e-09	7.13	10.1964	0.212	cg09037777	PKLR;PKLR	NM_000298;NM_181871	Body;Body	155265378	155265501	NC_000001.10
cg10687107	2.48e-06	5.82e-09	7.13	10.1939	0.235	cg10687107				67454667	67454790	NC_000008.10
cg12492885	2.48e-06	5.85e-09	7.13	10.1894	0.275	cg12492885	C22orf45;C22orf45;UPB1	NR_028484;NR_028483;NM_016327	TSS200;TSS200;TSS1500	24890814	24890937	NC_000022.10
cg05184377	2.48e-06	5.87e-09	7.13	10.186	0.205	cg05184377				50976646	50976769	NC_000010.10
cg14270293	2.48e-06	5.87e-09	7.13	10.185	0.29	cg14270293	SH3D19;SH3D19	NM_001009555;NM_001128923	TSS1500;TSS1500	152149064	152149187	NC_000004.11
cg20411935	2.48e-06	5.88e-09	7.13	10.1837	0.286	cg20411935				228653095	228653218	NC_000001.10
cg17316649	2.49e-06	5.92e-09	7.12	10.1769	0.272	cg17316649	HLA-DRB1	NM_002124	Body	32552016	32552139	NC_000006.11
cg07709475	2.51e-06	5.96e-09	7.12	10.1706	0.209	cg07709475	SH3PXD2A	NM_014631	Body	105423558	105423681	NC_000010.10
cg15084851	2.53e-06	6.02e-09	7.12	10.1607	0.191	cg15084851	EIF2C4	NM_017629	Body	36317380	36317503	NC_000001.10
cg24369989	2.54e-06	6.04e-09	7.12	10.1566	0.233	cg24369989	CHRNB4	NM_000750	TSS1500	78933807	78933930	NC_000015.9
cg05331498	2.56e-06	6.1e-09	7.11	10.1478	0.127	cg05331498	CHDH;IL17RB	NM_018397;NM_018725	TSS1500;Body	53880775	53880898	NC_000003.11
cg27021181	2.57e-06	6.14e-09	7.11	10.1417	0.271	cg27021181	NET1;NET1	NM_001047160;NM_005863	Body;TSS200	5488346	5488469	NC_000010.10
cg08249385	2.57e-06	6.14e-09	7.11	10.1411	0.127	cg08249385	TSC2;TSC2;TSC2	NM_001077183;NM_000548;NM_001114382	Body;Body;Body	2128901	2129024	NC_000016.9
cg00074145	2.58e-06	6.18e-09	7.11	10.1342	0.411	cg00074145	ONECUT1	NM_004498	Body	53075505	53075628	NC_000015.9
cg18046677	2.58e-06	6.19e-09	7.11	10.1329	0.34	cg18046677	MAMSTR;MAMSTR;MAMSTR	NM_182574;NM_001130915;NM_182574	1stExon;Body;5'UTR	49220142	49220265	NC_000019.9
cg13019491	2.59e-06	6.21e-09	7.11	10.1294	0.362	cg13019491	SIX6	NM_007374	Body	60977856	60977979	NC_000014.8
cg03839074	2.59e-06	6.22e-09	7.11	10.1273	0.226	cg03839074				43000303	43000426	NC_000005.9
cg05643373	2.59e-06	6.25e-09	7.11	10.1241	0.169	cg05643373	MAMSTR;MAMSTR	NM_182574;NM_001130915	TSS1500;Body	49220422	49220545	NC_000019.9
cg19802138	2.61e-06	6.3e-09	7.11	10.1155	0.164	cg19802138	SOX1	NM_005986	1stExon	112722719	112722842	NC_000013.10
cg04484550	2.62e-06	6.35e-09	7.1	10.1077	0.242	cg04484550	FLJ42875	NR_015440	Body	2980163	2980286	NC_000001.10
cg21830459	2.62e-06	6.35e-09	7.1	10.1074	0.309	cg21830459	CECR1;CECR1	NM_177405;NM_017424	TSS200;Body	17680563	17680686	NC_000022.10
cg25156118	2.62e-06	6.36e-09	7.1	10.1067	0.217	cg25156118	LRFN1	NM_020862	Body	39799137	39799260	NC_000019.9
cg14036143	2.64e-06	6.41e-09	7.1	10.0979	0.276	cg14036143	HFE2;HFE2;HFE2;HFE2	NM_202004;NM_213652;NM_145277;NM_213653	5'UTR;5'UTR;5'UTR;Body	145415441	145415564	NC_000001.10
cg03402459	2.64e-06	6.42e-09	7.1	10.0968	0.278	cg03402459				29521407	29521530	NC_000006.11
cg04918770	2.64e-06	6.44e-09	7.1	10.0939	0.281	cg04918770				18053826	18053949	NC_000006.11
cg02904657	2.65e-06	6.47e-09	7.1	10.0887	0.206	cg02904657				40571997	40572120	NC_000015.9
cg13621701	2.65e-06	6.49e-09	7.1	10.0863	0.169	cg13621701	BAIAP2;BAIAP2;BAIAP2;BAIAP2	NM_017450;NM_006340;NM_001144888;NM_017451	Body;Body;Body;Body	79026930	79027053	NC_000017.10
cg22935450	2.66e-06	6.51e-09	7.1	10.0824	0.229	cg22935450	RARA	NM_000964	TSS200	38465393	38465516	NC_000017.10
cg05695876	2.66e-06	6.52e-09	7.1	10.0808	0.214	cg05695876	NAV1	NM_020443	Body	201665422	201665545	NC_000001.10
cg10721834	2.67e-06	6.56e-09	7.09	10.0746	0.224	cg10721834				22990066	22990189	NC_000019.9
cg21171625	2.67e-06	6.58e-09	7.09	10.0725	0.219	cg21171625	DNALI1	NM_003462	1stExon	38022607	38022730	NC_000001.10
cg22305167	2.67e-06	6.61e-09	7.09	10.0685	0.381	cg22305167				29521420	29521543	NC_000006.11
cg15526213	2.68e-06	6.61e-09	7.09	10.0672	0.129	cg15526213				43818881	43819004	NC_000010.10
cg24068468	2.68e-06	6.62e-09	7.09	10.0663	0.274	cg24068468	NET1;NET1	NM_001047160;NM_005863	Body;TSS200	5488535	5488658	NC_000010.10
cg16430365	2.68e-06	6.64e-09	7.09	10.064	0.182	cg16430365				86598888	86599011	NC_000016.9
cg08566455	2.7e-06	6.71e-09	7.09	10.0533	0.362	cg08566455				130971164	130971287	NC_000002.11
cg04065086	2.71e-06	6.72e-09	7.09	10.0516	0.282	cg04065086	SEMA6C	NM_030913	3'UTR	151104186	151104309	NC_000001.10
cg19925872	2.73e-06	6.78e-09	7.08	10.0432	0.265	cg19925872	ZNF710	NM_198526	TSS1500	90543392	90543515	NC_000015.9
cg15475323	2.73e-06	6.79e-09	7.08	10.0408	0.289	cg15475323	MAMSTR;MAMSTR;MAMSTR	NM_182574;NM_001130915;NM_182574	1stExon;Body;5'UTR	49220102	49220225	NC_000019.9
cg06882544	2.73e-06	6.81e-09	7.08	10.039	0.0932	cg06882544				298926	299049	NC_000004.11
cg01078048	2.74e-06	6.85e-09	7.08	10.0329	0.229	cg01078048	LRP4	NM_002334	Body	46935970	46936093	NC_000011.9
cg26958124	2.75e-06	6.87e-09	7.08	10.0296	0.272	cg26958124	OPA3	NM_001017989	Body	46032528	46032651	NC_000019.9
cg12744812	2.75e-06	6.87e-09	7.08	10.029	0.232	cg12744812				156810819	156810942	NC_000007.13
cg13248581	2.75e-06	6.89e-09	7.08	10.0268	0.285	cg13248581	CECR1;CECR1	NM_177405;NM_017424	TSS200;Body	17680545	17680668	NC_000022.10
cg03547017	2.75e-06	6.89e-09	7.08	10.0264	0.231	cg03547017	LASP1	NM_006148	Body	37031281	37031404	NC_000017.10
cg17401780	2.78e-06	7.03e-09	7.07	10.0073	0.151	cg17401780				129949004	129949127	NC_000010.10
cg26381514	2.78e-06	7.04e-09	7.07	10.0052	0.317	cg26381514	ITPR2	NM_002223	Body	26963489	26963612	NC_000012.11
cg03526459	2.79e-06	7.08e-09	7.07	10.0003	0.362	cg03526459				146549940	146550063	NC_000001.10
cg03795157	2.83e-06	7.21e-09	7.07	9.98165	0.294	cg03795157	ZNF605;ZNF605	NM_001164715;NM_183238	5'UTR;5'UTR	133531927	133532050	NC_000012.11
cg11751707	2.84e-06	7.24e-09	7.07	9.9781	0.28	cg11751707	CYP1B1	NM_000104	5'UTR	38302587	38302710	NC_000002.11
cg00649827	2.85e-06	7.28e-09	7.06	9.97283	0.0607	cg00649827	PDIA3;CATSPER2P1	NM_005313;NR_002318	1stExon;TSS1500	44038871	44038994	NC_000015.9
cg00713400	2.85e-06	7.31e-09	7.06	9.96781	0.352	cg00713400	RAPGEF5	NM_012294	Body	22233206	22233329	NC_000007.13
cg17032564	2.85e-06	7.31e-09	7.06	9.96776	0.218	cg17032564				158531394	158531517	NC_000005.9
cg02026535	2.87e-06	7.35e-09	7.06	9.9624	0.249	cg02026535	ZNF358	NM_018083	TSS1500	7580217	7580340	NC_000019.9
cg19753174	2.87e-06	7.38e-09	7.06	9.95929	0.227	cg19753174	LYPLAL1	NM_138794	Body	219351218	219351341	NC_000001.10
cg24263062	2.89e-06	7.44e-09	7.06	9.95128	0.335	cg24263062	EBF4	NM_001110514	Body	2730191	2730314	NC_000020.10
cg26422151	2.89e-06	7.44e-09	7.06	9.95127	0.19	cg26422151				88136949	88137072	NC_000010.10
cg21542223	2.89e-06	7.44e-09	7.06	9.95087	0.255	cg21542223				91190005	91190128	NC_000001.10
cg08461339	2.93e-06	7.57e-09	7.05	9.93389	0.264	cg08461339	ANKMY1;ANKMY1	NM_017844;NM_016552	Body;Body	241459227	241459350	NC_000002.11
cg11463380	2.94e-06	7.59e-09	7.05	9.93133	0.181	cg11463380	RGS12;RGS12;RGS12	NM_198229;NM_198227;NM_002926	Body;Body;Body	3410693	3410816	NC_000004.11
cg17591188	2.98e-06	7.7e-09	7.05	9.91636	0.162	cg17591188				539530	539653	NC_000005.9
cg10273135	2.98e-06	7.72e-09	7.05	9.91443	0.289	cg10273135	CMYA5	NM_153610	Body	78986111	78986234	NC_000005.9
cg20666917	2.99e-06	7.76e-09	7.04	9.90903	0.202	cg20666917	C2orf55	NM_207362	Body	99439848	99439971	NC_000002.11
cg18365406	3.01e-06	7.82e-09	7.04	9.9009	0.285	cg18365406	LPPR2;LPPR2	NM_022737;NM_001170635	Body;Body	11472110	11472233	NC_000019.9
cg12150256	3.01e-06	7.83e-09	7.04	9.8998	0.247	cg12150256	HYAL2;HYAL2	NM_003773;NM_033158	5'UTR;TSS1500	50359849	50359972	NC_000003.11
cg10319943	3.01e-06	7.85e-09	7.04	9.89749	0.14	cg10319943	LOC100130015;LOC100130015	NR_027335;NR_027336	TSS1500;TSS1500	90115013	90115136	NC_000016.9
cg14237550	3.01e-06	7.85e-09	7.04	9.89739	0.113	cg14237550	MST1P2	NR_027504	Body	16974585	16974708	NC_000001.10
cg25644556	3.01e-06	7.85e-09	7.04	9.89711	0.297	cg25644556	MIR196B	NR_029911	TSS1500	27209582	27209705	NC_000007.13
cg21918313	3.02e-06	7.9e-09	7.04	9.89154	0.236	cg21918313	FBXO41	NM_001080410	Body	73496203	73496326	NC_000002.11
cg12593515	3.02e-06	7.92e-09	7.04	9.88823	0.281	cg12593515	RAPGEF5	NM_012294	Body	22233159	22233282	NC_000007.13
cg13411923	3.02e-06	7.93e-09	7.04	9.88712	0.122	cg13411923	WDR66	NM_144668	Body	122396677	122396800	NC_000012.11
cg00594099	3.02e-06	7.94e-09	7.04	9.88628	0.203	cg00594099	AHDC1	NM_001029882	5'UTR	27893886	27894009	NC_000001.10
cg00396667	3.03e-06	7.97e-09	7.04	9.88282	0.337	cg00396667	PITX1	NM_002653	3'UTR	134364387	134364510	NC_000005.9
cg17885226	3.05e-06	8.03e-09	7.03	9.87525	0.244	cg17885226				105388731	105388854	NC_000006.11
cg00864618	3.05e-06	8.03e-09	7.03	9.87465	0.309	cg00864618				141518479	141518602	NC_000008.10
cg00044796	3.05e-06	8.06e-09	7.03	9.87129	0.319	cg00044796				146552390	146552513	NC_000001.10
cg22694818	3.06e-06	8.1e-09	7.03	9.86676	0.303	cg22694818	LHX8	NM_001001933	5'UTR	75595970	75596093	NC_000001.10
cg07166795	3.06e-06	8.11e-09	7.03	9.86494	0.146	cg07166795	ST3GAL3;ST3GAL3;ST3GAL3;ST3GAL3;ST3GAL3;ST3GAL3;ST3GAL3;ST3GAL3;ST3GAL3;ST3GAL3	NM_174968;NM_006279;NM_174971;NM_174963;NM_174967;NM_174969;NM_174970;NM_174964;NM_174965;NM_174966	Body;Body;Body;Body;Body;Body;Body;Body;Body;Body	44351061	44351184	NC_000001.10
cg01292846	3.06e-06	8.13e-09	7.03	9.86349	0.183	cg01292846				33672543	33672666	NC_000017.10
cg12072972	3.06e-06	8.13e-09	7.03	9.86329	0.233	cg12072972	SIGIRR;SIGIRR;SIGIRR	NM_001135054;NM_021805;NM_001135053	Body;Body;Body	405958	406081	NC_000011.9
cg10379418	3.06e-06	8.14e-09	7.03	9.86138	0.18	cg10379418				53936188	53936311	NC_000001.10
cg24603926	3.06e-06	8.17e-09	7.03	9.85773	0.15	cg24603926	MIR1178;CIT	NR_031589;NM_007174	TSS200;Body	120151679	120151802	NC_000012.11
cg12821804	3.09e-06	8.27e-09	7.03	9.84614	0.315	cg12821804	KCNQ1DN	NR_024627	TSS1500	2890705	2890828	NC_000011.9
cg09024228	3.11e-06	8.32e-09	7.02	9.8399	0.214	cg09024228				116707400	116707523	NC_000001.10
cg18264486	3.11e-06	8.36e-09	7.02	9.83531	0.296	cg18264486				31650916	31651039	NC_000006.11
cg12136274	3.11e-06	8.36e-09	7.02	9.83525	0.324	cg12136274	PDIA3P	NR_002305	Body	146649770	146649893	NC_000001.10
cg27371456	3.11e-06	8.38e-09	7.02	9.83345	0.115	cg27371456	FBXW4	NM_022039	Body	103406305	103406428	NC_000010.10
cg05937737	3.11e-06	8.38e-09	7.02	9.83267	0.269	cg05937737	SLC7A14	NM_020949	5'UTR	170303540	170303663	NC_000003.11
cg20672981	3.12e-06	8.4e-09	7.02	9.83055	0.189	cg20672981				27242161	27242284	NC_000007.13
cg14476745	3.13e-06	8.46e-09	7.02	9.82392	0.229	cg14476745	LHX6;LHX6	NM_199160;NM_014368	Body;Body	124979356	124979479	NC_000009.11
cg23086519	3.14e-06	8.51e-09	7.02	9.81809	0.182	cg23086519				75703717	75703840	NC_000014.8
cg01973695	3.18e-06	8.64e-09	7.01	9.80276	0.249	cg01973695				128560328	128560451	NC_000011.9
cg05263838	3.18e-06	8.65e-09	7.01	9.80112	0.295	cg05263838	IRS1	NM_005544	3'UTR	227659406	227659529	NC_000002.11
cg20592017	3.18e-06	8.68e-09	7.01	9.79853	0.27	cg20592017				40364740	40364863	NC_000015.9
cg17861230	3.2e-06	8.73e-09	7.01	9.79249	0.191	cg17861230	PDE4C	NM_000923	Body	18343901	18344024	NC_000019.9
cg23341612	3.21e-06	8.79e-09	7.01	9.78569	0.222	cg23341612	HKDC1	NM_025130	TSS1500	70979777	70979900	NC_000010.10
cg20902783	3.21e-06	8.79e-09	7.01	9.78551	0.206	cg20902783	NDRG2;NDRG2;NDRG2;NDRG2;NDRG2;NDRG2;NDRG2;NDRG2	NM_201539;NM_201535;NM_201536;NM_201538;NM_201541;NM_201540;NM_016250;NM_201537	TSS1500;TSS200;TSS200;TSS1500;TSS1500;TSS1500;TSS200;TSS200	21494071	21494194	NC_000014.8
cg18969232	3.23e-06	8.86e-09	7.01	9.77791	0.274	cg18969232				45156937	45157060	NC_000002.11
cg11935147	3.23e-06	8.87e-09	7.01	9.77636	0.247	cg11935147	PDE4DIP	NM_022359	1stExon	145075831	145075954	NC_000001.10
cg08391745	3.23e-06	8.88e-09	7.01	9.77556	0.265	cg08391745				86609136	86609259	NC_000016.9
cg14062002	3.24e-06	8.9e-09	7.01	9.7736	0.238	cg14062002				139117468	139117591	NC_000006.11
cg11199014	3.24e-06	8.94e-09	7	9.7693	0.196	cg11199014	LRFN1	NM_020862	Body	39798563	39798686	NC_000019.9
cg02379724	3.24e-06	8.95e-09	7	9.76816	0.0341	cg02379724	UBE2I;UBE2I;UBE2I;UBE2I	NM_194261;NM_003345;NM_194260;NM_194259	Body;Body;Body;Body	1368007	1368130	NC_000016.9
cg20708173	3.25e-06	8.96e-09	7	9.76612	0.146	cg20708173	AFAP1;AFAP1	NM_198595;NM_001134647	5'UTR;5'UTR	7940426	7940549	NC_000004.11
cg21318213	3.25e-06	8.98e-09	7	9.76477	0.122	cg21318213	NR2F2;NR2F2;NR2F2;MIR1469;NR2F2	NM_001145156;NM_021005;NM_001145155;NR_031715;NM_001145157	TSS1500;1stExon;Body;TSS1500;TSS1500	96875591	96875714	NC_000015.9
cg19440264	3.25e-06	8.99e-09	7	9.76325	0.235	cg19440264	CHRNB1	NM_000747	Body	7350413	7350536	NC_000017.10
cg17820828	3.25e-06	9.01e-09	7	9.76115	0.169	cg17820828	KCNQ1;KCNQ1	NM_000218;NM_181798	Body;Body	2813298	2813421	NC_000011.9
cg01327147	3.26e-06	9.02e-09	7	9.76027	0.192	cg01327147	KIAA1161	NM_020702	Body	34371380	34371503	NC_000009.11
cg07937925	3.26e-06	9.03e-09	7	9.75916	0.301	cg07937925				15820699	15820822	NC_000017.10
cg23513966	3.26e-06	9.06e-09	7	9.75613	0.203	cg23513966	ISL2	NM_145805	Body	76630209	76630332	NC_000015.9
cg15760474	3.26e-06	9.06e-09	7	9.75524	0.315	cg15760474	FOXP4;FOXP4;FOXP4	NM_001012426;NM_001012427;NM_138457	Body;Body;Body	41554529	41554652	NC_000006.11
cg09665332	3.27e-06	9.1e-09	7	9.75168	0.242	cg09665332	SGIP1	NM_032291	Body	67022173	67022296	NC_000001.10
cg09820673	3.28e-06	9.15e-09	7	9.74637	0.191	cg09820673	LMNA;LMNA	NM_170707;NM_170708	3'UTR;3'UTR	156109329	156109452	NC_000001.10
cg24375211	3.28e-06	9.15e-09	7	9.74596	0.152	cg24375211	TBC1D16	NM_019020	Body	77955492	77955615	NC_000017.10
cg21355828	3.3e-06	9.22e-09	6.99	9.73818	0.328	cg21355828				149389814	149389937	NC_000007.13
cg04366300	3.32e-06	9.27e-09	6.99	9.73343	0.214	cg04366300	PKNOX2	NM_022062	5'UTR	125157962	125158085	NC_000011.9
cg11699265	3.32e-06	9.27e-09	6.99	9.73272	0.233	cg11699265	ARPC1B	NM_005720	Body	98990265	98990388	NC_000007.13
cg04974062	3.32e-06	9.29e-09	6.99	9.73082	0.308	cg04974062	PRDM13	NM_021620	Body	100056787	100056910	NC_000006.11
cg10316525	3.33e-06	9.34e-09	6.99	9.72549	0.213	cg10316525				40572137	40572260	NC_000015.9
cg13390284	3.33e-06	9.36e-09	6.99	9.72363	0.228	cg13390284				65531864	65531987	NC_000001.10
cg16651126	3.34e-06	9.37e-09	6.99	9.72214	0.214	cg16651126	HOXA4	NM_002141	TSS200	27170552	27170675	NC_000007.13
cg00351537	3.34e-06	9.39e-09	6.99	9.72024	0.239	cg00351537	ZNF358	NM_018083	TSS1500	7580275	7580398	NC_000019.9
cg06868946	3.34e-06	9.4e-09	6.99	9.71922	0.156	cg06868946	XKR4	NM_052898	1stExon	56015785	56015908	NC_000008.10
cg12111714	3.34e-06	9.41e-09	6.99	9.71773	0.282	cg12111714	ATP8A2	NM_016529	Body	26043472	26043595	NC_000013.10
cg12765028	3.35e-06	9.48e-09	6.99	9.71105	0.213	cg12765028				13526659	13526782	NC_000004.11
cg05250768	3.35e-06	9.48e-09	6.99	9.71086	0.336	cg05250768	MIR196B	NR_029911	TSS200	27209270	27209393	NC_000007.13
cg24124798	3.35e-06	9.5e-09	6.99	9.70831	0.081	cg24124798	ZNF814;ZNF814	NM_001144989;NM_001144989	1stExon;5'UTR	58400275	58400398	NC_000019.9
cg18881440	3.36e-06	9.58e-09	6.98	9.7008	0.248	cg18881440				176470789	176470912	NC_000002.11
cg24539848	3.38e-06	9.63e-09	6.98	9.69486	0.257	cg24539848	ANKMY1;ANKMY1	NM_017844;NM_016552	Body;Body	241458974	241459097	NC_000002.11
cg17915961	3.39e-06	9.68e-09	6.98	9.69031	0.251	cg17915961	LDB1	NM_001113407	TSS1500	103881480	103881603	NC_000010.10
cg14427527	3.4e-06	9.75e-09	6.98	9.68269	0.216	cg14427527	RGS14	NM_006480	Body	176793960	176794083	NC_000005.9
cg05951573	3.4e-06	9.75e-09	6.98	9.68256	0.25	cg05951573	AGAP3;AGAP3	NM_001042535;NM_031946	Body;Body	150812282	150812405	NC_000007.13
cg24884519	3.4e-06	9.77e-09	6.98	9.68087	0.359	cg24884519	MIR196B	NR_029911	TSS1500	27209790	27209913	NC_000007.13
cg01295399	3.4e-06	9.79e-09	6.98	9.67934	0.206	cg01295399	SLC18A3;CHAT;CHAT;CHAT	NM_003055;NM_020986;NM_020984;NM_020985	1stExon;TSS1500;5'UTR;TSS1500	50820278	50820401	NC_000010.10
cg24874003	3.41e-06	9.82e-09	6.98	9.67626	0.304	cg24874003	GNG7	NM_052847	5'UTR	2602614	2602737	NC_000019.9
cg17129937	3.42e-06	9.85e-09	6.98	9.67323	0.171	cg17129937	C12orf51	NM_001109662	3'UTR	112599805	112599928	NC_000012.11
cg12706938	3.44e-06	9.94e-09	6.97	9.66352	0.128	cg12706938	MEX3D	NM_203304	Body	1566839	1566962	NC_000019.9
cg04436755	3.44e-06	9.97e-09	6.97	9.66114	0.217	cg04436755	LOXL1	NM_005576	TSS200	74218767	74218890	NC_000015.9
cg22087053	3.44e-06	9.97e-09	6.97	9.66105	0.125	cg22087053	PCDHGA4;PCDHGB3;PCDHGA1;PCDHGA5;PCDHGB1;PCDHGA3;PCDHGB3;PCDHGA2;PCDHGB2	NM_018917;NM_018924;NM_018912;NM_018918;NM_018922;NM_018916;NM_032097;NM_018915;NM_018923	Body;1stExon;Body;Body;Body;Body;1stExon;Body;Body	140751506	140751629	NC_000005.9
cg08288811	3.45e-06	1e-08	6.97	9.65837	0.197	cg08288811	PCDHA2;PCDHA1;PCDHA3;PCDHA3;PCDHA1	NM_018905;NM_031411;NM_031497;NM_018906;NM_018900	Body;Body;1stExon;1stExon;Body	140180926	140181049	NC_000005.9
cg11865578	3.45e-06	1e-08	6.97	9.65717	0.211	cg11865578	NBEAL2	NM_015175	Body	47043996	47044119	NC_000003.11
cg06371211	3.45e-06	1e-08	6.97	9.65361	0.215	cg06371211	TCERG1L	NM_174937	Body	132976149	132976272	NC_000010.10
cg19560758	3.47e-06	1.01e-08	6.97	9.6493	0.0836	cg19560758	ERRFI1	NM_018948	TSS1500	8086721	8086844	NC_000001.10
cg05665069	3.48e-06	1.02e-08	6.97	9.64288	0.131	cg05665069				119883253	119883376	NC_000003.11
cg13093774	3.48e-06	1.02e-08	6.97	9.64284	0.27	cg13093774	PHYHIP;PHYHIP;PHYHIP;PHYHIP	NM_014759;NM_001099335;NM_014759;NM_001099335	1stExon;5'UTR;5'UTR;1stExon	22089400	22089523	NC_000008.10
cg20122518	3.49e-06	1.02e-08	6.97	9.63644	0.152	cg20122518	HEATR2	NM_017802	Body	810958	811081	NC_000007.13
cg02732252	3.49e-06	1.02e-08	6.97	9.6358	0.257	cg02732252	CLDN6	NM_021195	5'UTR	3068014	3068137	NC_000016.9
cg01274122	3.51e-06	1.03e-08	6.96	9.62866	0.15	cg01274122	MFHAS1	NM_004225	1stExon	8749938	8750061	NC_000008.10
cg14398691	3.51e-06	1.03e-08	6.96	9.62821	0.252	cg14398691	GRB7;GRB7	NM_005310;NM_001030002	5'UTR;5'UTR	37895771	37895894	NC_000017.10
cg09048251	3.51e-06	1.03e-08	6.96	9.62738	0.277	cg09048251				77253974	77254097	NC_000005.9
cg04006327	3.51e-06	1.04e-08	6.96	9.62377	0.138	cg04006327	ATG16L2	NM_033388	Body	72533487	72533610	NC_000011.9
cg11324999	3.52e-06	1.04e-08	6.96	9.6217	0.162	cg11324999	CRIM1	NM_016441	TSS1500	36582398	36582521	NC_000002.11
cg13761284	3.52e-06	1.04e-08	6.96	9.61974	0.164	cg13761284	FAM102A;FAM102A	NM_001035254;NM_203305	Body;Body	130708393	130708516	NC_000009.11
cg23075968	3.52e-06	1.04e-08	6.96	9.61897	0.15	cg23075968	INSR;INSR	NM_000208;NM_001079817	Body;Body	7293270	7293393	NC_000019.9
cg24860092	3.52e-06	1.04e-08	6.96	9.61832	0.146	cg24860092				36195363	36195486	NC_000019.9
cg22762189	3.53e-06	1.04e-08	6.96	9.61471	0.156	cg22762189	MSGN1	NM_001105569	TSS1500	17996994	17997117	NC_000002.11
cg02923856	3.58e-06	1.06e-08	6.95	9.59708	0.346	cg02923856	NR1D2;NR1D2	NM_001145425;NM_005126	5'UTR;Body	23989124	23989247	NC_000003.11
cg19623624	3.59e-06	1.07e-08	6.95	9.589	0.333	cg19623624	LOC619207	NR_002934	Body	135278901	135279024	NC_000010.10
cg16320159	3.59e-06	1.07e-08	6.95	9.58866	0.286	cg16320159	ADD3	NM_019903	TSS200	111765673	111765796	NC_000010.10
cg06786372	3.6e-06	1.08e-08	6.95	9.58516	0.226	cg06786372	HOXA2	NM_006735	Body	27141388	27141511	NC_000007.13
cg07095997	3.61e-06	1.08e-08	6.95	9.58137	0.365	cg07095997	SIX4	NM_017420	Body	61188431	61188554	NC_000014.8
cg00794178	3.61e-06	1.08e-08	6.95	9.58126	0.363	cg00794178	MCF2L2	NM_015078	Body	182897283	182897406	NC_000003.11
cg18281525	3.65e-06	1.1e-08	6.94	9.56624	0.166	cg18281525	ADRM1;ADRM1	NM_007002;NM_175573	Body;Body	60882762	60882885	NC_000020.10
cg07155724	3.65e-06	1.1e-08	6.94	9.56414	0.127	cg07155724	INF2;INF2;INF2	NM_022489;NM_032714;NM_001031714	5'UTR;5'UTR;5'UTR	105165730	105165853	NC_000014.8
cg17495087	3.67e-06	1.11e-08	6.94	9.55695	0.301	cg17495087				96085689	96085812	NC_000008.10
cg26791464	3.67e-06	1.11e-08	6.94	9.55641	0.199	cg26791464	COL9A2	NM_001852	Body	40769744	40769867	NC_000001.10
cg26313337	3.67e-06	1.11e-08	6.94	9.55637	0.216	cg26313337	SLC9A1	NM_003047	Body	27468772	27468895	NC_000001.10
cg18336674	3.69e-06	1.11e-08	6.94	9.55064	0.237	cg18336674	TLX3	NM_021025	TSS1500	170735264	170735387	NC_000005.9
cg11254700	3.7e-06	1.12e-08	6.94	9.54195	0.34	cg11254700				53561386	53561509	NC_000019.9
cg23701184	3.77e-06	1.15e-08	6.93	9.51942	0.17	cg23701184	MEPCE	NM_019606	Body	100030314	100030437	NC_000007.13
cg07571337	3.8e-06	1.16e-08	6.93	9.50819	0.168	cg07571337				93805844	93805967	NC_000010.10
cg13568106	3.82e-06	1.17e-08	6.93	9.50408	0.289	cg13568106				26835115	26835238	NC_000017.10
cg14832317	3.82e-06	1.17e-08	6.93	9.50216	0.171	cg14832317				13526597	13526720	NC_000004.11
cg13826452	3.83e-06	1.18e-08	6.92	9.49669	0.289	cg13826452				26758395	26758518	NC_000006.11
cg24617504	3.86e-06	1.19e-08	6.92	9.48795	0.194	cg24617504				155164762	155164885	NC_000007.13
cg14472181	3.86e-06	1.19e-08	6.92	9.48584	0.276	cg14472181	BRD3	NM_007371	5'UTR	136921209	136921332	NC_000009.11
cg23300529	3.86e-06	1.19e-08	6.92	9.48411	0.168	cg23300529	HR;HR	NM_018411;NM_005144	TSS1500;TSS1500	21989012	21989135	NC_000008.10
cg03339077	3.88e-06	1.2e-08	6.92	9.47973	0.242	cg03339077	C11orf49;C11orf49;C11orf49;C11orf49	NM_001003677;NM_024113;NM_001003676;NM_001003678	Body;Body;Body;Body	47165057	47165180	NC_000011.9
cg11724602	3.89e-06	1.21e-08	6.92	9.47208	0.318	cg11724602				197099072	197099195	NC_000003.11
cg27053299	3.9e-06	1.21e-08	6.92	9.47012	0.222	cg27053299	CLYBL	NM_206808	3'UTR	100548780	100548903	NC_000013.10
cg11174855	3.9e-06	1.21e-08	6.92	9.46931	0.304	cg11174855	NKX6-2	NM_177400	3'UTR	134598352	134598475	NC_000010.10
cg11639651	3.91e-06	1.22e-08	6.92	9.46481	0.209	cg11639651	HKDC1	NM_025130	TSS1500	70979811	70979934	NC_000010.10
cg20945085	3.91e-06	1.22e-08	6.91	9.46077	0.282	cg20945085	C2orf65	NM_138804	TSS200	74875227	74875350	NC_000002.11
cg20310894	3.92e-06	1.22e-08	6.91	9.45716	0.197	cg20310894	HHIPL1;HHIPL1	NM_032425;NM_001127258	Body;Body	100125898	100126021	NC_000014.8
cg12881321	3.92e-06	1.23e-08	6.91	9.45531	0.218	cg12881321	B3GALNT1;B3GALNT1;B3GALNT1;B3GALNT1;B3GALNT1	NM_001038628;NM_033167;NM_033168;NM_033169;NM_003781	5'UTR;5'UTR;5'UTR;5'UTR;5'UTR	160822268	160822391	NC_000003.11
cg11972677	3.94e-06	1.23e-08	6.91	9.44977	0.276	cg11972677	MPPED2	NM_001145399	5'UTR	30605704	30605827	NC_000011.9
cg21033440	3.95e-06	1.24e-08	6.91	9.44523	0.235	cg21033440	SIPA1;SIPA1	NM_153253;NM_006747	Body;Body	65409861	65409984	NC_000011.9
cg14221766	3.95e-06	1.24e-08	6.91	9.44491	0.227	cg14221766				36818572	36818695	NC_000009.11
cg07290269	3.95e-06	1.24e-08	6.91	9.44304	0.31	cg07290269	FAM60A;FAM60A;FAM60A	NM_021238;NM_001135812;NM_001135811	TSS1500;TSS1500;TSS1500	31479853	31479976	NC_000012.11
cg05152903	3.95e-06	1.24e-08	6.91	9.44279	0.283	cg05152903	CSDA;CSDA	NM_003651;NM_001145426	Body;Body	10872218	10872341	NC_000012.11
cg02798280	3.96e-06	1.25e-08	6.91	9.43956	0.138	cg02798280	MAP4K1;MAP4K1	NM_001042600;NM_007181	Body;Body	39087135	39087258	NC_000019.9
cg09490371	3.99e-06	1.26e-08	6.91	9.43135	0.199	cg09490371	ECEL1P2	NR_028501	TSS1500	233253024	233253147	NC_000002.11
cg07683388	3.99e-06	1.26e-08	6.91	9.43113	0.18	cg07683388	ANKRD44	NM_153697	Body	198029332	198029455	NC_000002.11
cg25527090	3.99e-06	1.26e-08	6.9	9.43031	0.321	cg25527090	VAX1;VAX1	NM_199131;NM_001112704	Body;Body	118894180	118894303	NC_000010.10
cg23026543	3.99e-06	1.26e-08	6.9	9.42954	0.34	cg23026543	AUTS2;AUTS2	NM_015570;NM_001127231	Body;Body	70203221	70203344	NC_000007.13
cg21606036	4.02e-06	1.27e-08	6.9	9.4234	0.238	cg21606036	CMYA5	NM_153610	Body	78985900	78986023	NC_000005.9
cg12405048	4.04e-06	1.28e-08	6.9	9.41477	0.261	cg12405048				112074086	112074209	NC_000012.11
cg09099572	4.04e-06	1.28e-08	6.9	9.41409	0.131	cg09099572	FHOD1	NM_013241	Body	67270972	67271095	NC_000016.9
cg13169796	4.04e-06	1.28e-08	6.9	9.41297	0.195	cg13169796	TMEM135;TMEM135;TMEM135	NR_033149;NM_022918;NM_001168724	Body;Body;Body	86793667	86793790	NC_000011.9
cg20408181	4.05e-06	1.28e-08	6.9	9.40985	0.192	cg20408181				208977395	208977518	NC_000002.11
cg02852959	4.06e-06	1.29e-08	6.9	9.40424	0.294	cg02852959	NRIP2	NM_031474	TSS1500	2944436	2944559	NC_000012.11
cg14556683	4.08e-06	1.3e-08	6.9	9.39752	0.208	cg14556683	EPHX3;EPHX3	NM_024794;NM_001142886	1stExon;Body	15342982	15343105	NC_000019.9
cg03991721	4.09e-06	1.31e-08	6.89	9.39443	0.143	cg03991721				75704951	75705074	NC_000003.11
cg25504607	4.09e-06	1.31e-08	6.89	9.39436	0.268	cg25504607				30728534	30728657	NC_000013.10
cg13390326	4.09e-06	1.31e-08	6.89	9.394	0.162	cg13390326				43034102	43034225	NC_000005.9
cg07039560	4.09e-06	1.31e-08	6.89	9.39286	0.229	cg07039560	SLC25A2	NM_031947	TSS200	140683681	140683804	NC_000005.9
cg02399048	4.1e-06	1.31e-08	6.89	9.38817	0.186	cg02399048	REEP4	NM_025232	TSS1500	22000318	22000441	NC_000008.10
cg12345501	4.11e-06	1.32e-08	6.89	9.38623	0.208	cg12345501				180936706	180936829	NC_000002.11
cg16133681	4.11e-06	1.32e-08	6.89	9.38522	0.269	cg16133681	IFLTD1	NM_001145727	TSS200	25801621	25801744	NC_000012.11
cg21470387	4.11e-06	1.32e-08	6.89	9.38367	0.3	cg21470387	ALDH2;ALDH2	NM_000690;NM_000690	5'UTR;1stExon	112204761	112204884	NC_000012.11
cg08151705	4.12e-06	1.32e-08	6.89	9.38164	0.21	cg08151705	SLFN13	NM_144682	TSS200	33775917	33776040	NC_000017.10
cg00105628	4.12e-06	1.32e-08	6.89	9.38049	0.214	cg00105628				21087165	21087288	NC_000020.10
cg05188448	4.12e-06	1.33e-08	6.89	9.37822	0.121	cg05188448	LOC647979	NR_027451	TSS1500	34639324	34639447	NC_000020.10
cg03441770	4.12e-06	1.33e-08	6.89	9.37783	0.197	cg03441770				81128845	81128968	NC_000004.11
cg04497992	4.15e-06	1.34e-08	6.89	9.36976	0.186	cg04497992	NHLRC4	NM_176677	TSS1500	616212	616335	NC_000016.9
cg23095584	4.17e-06	1.35e-08	6.89	9.36298	0.182	cg23095584	GBX2	NM_001485	TSS1500	237077704	237077827	NC_000002.11
cg19827182	4.17e-06	1.35e-08	6.88	9.36097	0.244	cg19827182	ECE1	NM_001113348	Body	21640802	21640925	NC_000001.10
cg23891996	4.18e-06	1.35e-08	6.88	9.35918	0.0936	cg23891996				9517858	9517981	NC_000019.9
cg13351352	4.18e-06	1.35e-08	6.88	9.35825	0.229	cg13351352	AKT2	NM_001626	Body	40751858	40751981	NC_000019.9
cg00779065	4.19e-06	1.36e-08	6.88	9.35494	0.329	cg00779065				61119218	61119341	NC_000014.8
cg05452406	4.19e-06	1.36e-08	6.88	9.35405	0.36	cg05452406	GCM2	NM_004752	Body	10881891	10882014	NC_000006.11
cg06891775	4.19e-06	1.36e-08	6.88	9.35138	0.125	cg06891775	LOC283050;LOC283050;LOC283050	NR_024431;NR_024429;NR_015429	Body;Body;Body	80704982	80705105	NC_000010.10
cg21517904	4.19e-06	1.37e-08	6.88	9.34918	0.229	cg21517904	TBX1;TBX1;TBX1	NM_080646;NM_005992;NM_080647	5'UTR;5'UTR;5'UTR	19747026	19747149	NC_000022.10
cg02629106	4.19e-06	1.37e-08	6.88	9.34877	0.314	cg02629106	PCDP1	NM_001029996	5'UTR	120302419	120302542	NC_000002.11
cg11598403	4.22e-06	1.38e-08	6.88	9.34244	0.241	cg11598403	MBP;MBP	NM_001025100;NM_001025101	Body;Body	74799500	74799623	NC_000018.9
cg12334488	4.22e-06	1.38e-08	6.88	9.34136	0.203	cg12334488	GDF7	NM_182828	Body	20871173	20871296	NC_000002.11
cg08750534	4.22e-06	1.38e-08	6.88	9.34073	0.252	cg08750534	SPRED2	NM_181784	Body	65630259	65630382	NC_000002.11
cg18623980	4.22e-06	1.38e-08	6.88	9.33999	0.324	cg18623980				45240563	45240686	NC_000002.11
cg05242416	4.23e-06	1.38e-08	6.88	9.33724	0.293	cg05242416	MAP4;MAP4;MAP4	NM_030885;NM_001134364;NM_002375	5'UTR;5'UTR;5'UTR	48128669	48128792	NC_000003.11
cg22780475	4.23e-06	1.38e-08	6.88	9.33695	0.198	cg22780475	CBLC;CBLC	NM_012116;NM_001130852	1stExon;1stExon	45281526	45281649	NC_000019.9
cg19895047	4.23e-06	1.39e-08	6.88	9.33502	0.224	cg19895047	CSGALNACT1;CSGALNACT1;CSGALNACT1	NM_001130518;NR_024040;NM_018371	TSS200;Body;5'UTR	19460197	19460320	NC_000008.10
cg21167532	4.25e-06	1.4e-08	6.87	9.32759	0.125	cg21167532	KIAA1522	NM_020888	Body	33231272	33231395	NC_000001.10
cg09451457	4.29e-06	1.41e-08	6.87	9.31932	0.315	cg09451457				87440246	87440369	NC_000005.9
cg10804656	4.29e-06	1.41e-08	6.87	9.31804	0.3	cg10804656				22623460	22623583	NC_000010.10
cg07084930	4.29e-06	1.41e-08	6.87	9.31802	0.169	cg07084930	MTA1	NM_004689	Body	105935351	105935474	NC_000014.8
cg09803951	4.3e-06	1.42e-08	6.87	9.31402	0.337	cg09803951	HLA-A	NM_002116	Body	29910796	29910919	NC_000006.11
cg01363324	4.3e-06	1.42e-08	6.87	9.31363	0.205	cg01363324	LHX6;LHX6	NM_199160;NM_014368	Body;Body	124979353	124979476	NC_000009.11
cg03461781	4.3e-06	1.42e-08	6.87	9.313	0.115	cg03461781	RAGE	NM_014226	Body	102723229	102723352	NC_000014.8
cg26259537	4.31e-06	1.43e-08	6.87	9.30714	0.303	cg26259537	MIR196B	NR_029911	TSS200	27209247	27209370	NC_000007.13
cg02621287	4.31e-06	1.43e-08	6.87	9.30623	0.315	cg02621287				11653278	11653401	NC_000012.11
cg16993043	4.32e-06	1.43e-08	6.87	9.30429	0.326	cg16993043	NR5A2;NR5A2	NM_205860;NM_003822	Body;Body	200008026	200008149	NC_000001.10
cg10821226	4.32e-06	1.43e-08	6.87	9.30328	0.194	cg10821226				29818277	29818400	NC_000006.11
cg13307384	4.32e-06	1.43e-08	6.87	9.30313	0.131	cg13307384	PRPF40B;PRPF40B	NM_012272;NM_012272	5'UTR;1stExon	50017787	50017910	NC_000012.11
cg02127234	4.34e-06	1.44e-08	6.87	9.29742	0.202	cg02127234	SGK3;SGK3;SGK3	NM_013257;NM_001033578;NM_170709	5'UTR;5'UTR;5'UTR	67688534	67688657	NC_000008.10
cg15616310	4.35e-06	1.45e-08	6.86	9.29155	0.249	cg15616310	AMOTL1	NM_130847	Body	94570647	94570770	NC_000011.9
cg24798010	4.36e-06	1.45e-08	6.86	9.28944	0.229	cg24798010	CRB3;CRB3	NM_174881;NM_139161	Body;Body	6464885	6465008	NC_000019.9
cg11866719	4.36e-06	1.45e-08	6.86	9.28916	0.207	cg11866719	RTN1	NM_021136	Body	60336433	60336556	NC_000014.8
cg17911539	4.36e-06	1.46e-08	6.86	9.28648	0.162	cg17911539	CHST13	NM_152889	Body	126260814	126260937	NC_000003.11
cg12610087	4.36e-06	1.46e-08	6.86	9.2862	0.155	cg12610087	LOC285954;LOC285954	NR_027118;NR_027119	Body;Body	41745737	41745860	NC_000007.13
cg06219301	4.36e-06	1.46e-08	6.86	9.28223	0.124	cg06219301	RAB40C	NM_021168	Body	671340	671463	NC_000016.9
cg24035682	4.36e-06	1.46e-08	6.86	9.28184	0.157	cg24035682	KDM2B;KDM2B	NM_032590;NM_001005366	Body;Body	121958802	121958925	NC_000012.11
cg23948843	4.36e-06	1.46e-08	6.86	9.28135	0.193	cg23948843				164204752	164204875	NC_000002.11
cg17978548	4.37e-06	1.46e-08	6.86	9.28005	0.232	cg17978548				103589260	103589383	NC_000008.10
cg07575680	4.39e-06	1.47e-08	6.86	9.27512	0.213	cg07575680	DKFZp761E198	NM_138368	TSS1500	65549260	65549383	NC_000011.9
cg03738025	4.4e-06	1.48e-08	6.86	9.27008	0.327	cg03738025				105388694	105388817	NC_000006.11
cg02169713	4.41e-06	1.48e-08	6.86	9.26816	0.19	cg02169713				31651094	31651217	NC_000006.11
cg06154313	4.42e-06	1.49e-08	6.86	9.26562	0.115	cg06154313	RBP4	NM_006744	Body	95360494	95360617	NC_000010.10
cg25032595	4.42e-06	1.49e-08	6.86	9.26413	0.368	cg25032595	CLDN10;CLDN10;CLDN10;CLDN10	NM_006984;NM_006984;NM_182848;NM_001160100	5'UTR;1stExon;Body;Body	96204978	96205101	NC_000013.10
cg19264571	4.42e-06	1.49e-08	6.86	9.26344	0.191	cg19264571	APCDD1	NM_153000	TSS1500	10454085	10454208	NC_000018.9
cg10089865	4.42e-06	1.49e-08	6.86	9.26296	0.264	cg10089865	GATA3;GATA3	NM_001002295;NM_002051	Body;Body	8100286	8100409	NC_000010.10
cg01385959	4.43e-06	1.49e-08	6.86	9.26107	0.298	cg01385959				190119363	190119486	NC_000002.11
cg04464276	4.46e-06	1.5e-08	6.85	9.25391	0.156	cg04464276	SMPD3	NM_018667	5'UTR	68481049	68481172	NC_000016.9
cg23061795	4.46e-06	1.51e-08	6.85	9.25027	0.294	cg23061795				106269962	106270085	NC_000011.9
cg14043049	4.46e-06	1.51e-08	6.85	9.25012	0.0971	cg14043049	GMIP	NM_016573	Body	19748575	19748698	NC_000019.9
cg02168303	4.49e-06	1.52e-08	6.85	9.24115	0.286	cg02168303				27265309	27265432	NC_000007.13
cg26244646	4.51e-06	1.53e-08	6.85	9.2354	0.315	cg26244646	BCAS3;BCAS3	NM_001099432;NM_017679	Body;Body	59391924	59392047	NC_000017.10
cg19747604	4.53e-06	1.54e-08	6.85	9.23122	0.1	cg19747604	CCDC8	NM_032040	1stExon	46915570	46915693	NC_000019.9
cg26777809	4.53e-06	1.54e-08	6.85	9.2306	0.247	cg26777809	LRRC1	NM_018214	Body	53695333	53695456	NC_000006.11
cg02308560	4.53e-06	1.54e-08	6.85	9.22972	0.134	cg02308560	HMHA1	NM_012292	Body	1071176	1071299	NC_000019.9
cg00298065	4.53e-06	1.55e-08	6.85	9.22717	0.261	cg00298065	ZNF274;ZNF274;ZNF274	NM_133502;NM_016325;NM_016324	Body;Body;5'UTR	58715577	58715700	NC_000019.9
cg17190891	4.53e-06	1.55e-08	6.85	9.22626	0.152	cg17190891	SH2B2	NM_020979	3'UTR	101962112	101962235	NC_000007.13
cg13356253	4.53e-06	1.55e-08	6.85	9.22594	0.165	cg13356253	LOC100302652;GPR75	NM_001164165;NM_006794	TSS200;TSS200	54087189	54087312	NC_000002.11
cg19127138	4.54e-06	1.55e-08	6.84	9.22379	0.263	cg19127138				65196881	65197004	NC_000007.13
cg16562342	4.54e-06	1.55e-08	6.84	9.22258	0.224	cg16562342				109783503	109783626	NC_000001.10
cg00400448	4.54e-06	1.56e-08	6.84	9.22003	0.282	cg00400448				60285691	60285814	NC_000015.9
cg18490614	4.56e-06	1.56e-08	6.84	9.21587	0.214	cg18490614				27213362	27213485	NC_000015.9
cg23348270	4.56e-06	1.56e-08	6.84	9.21519	0.325	cg23348270				176969612	176969735	NC_000002.11
cg02380585	4.57e-06	1.57e-08	6.84	9.21165	0.263	cg02380585	SLFN13	NM_144682	TSS1500	33776683	33776806	NC_000017.10
cg25417842	4.61e-06	1.59e-08	6.84	9.20037	0.205	cg25417842	AGAP3	NM_031946	Body	150822987	150823110	NC_000007.13
cg09242181	4.61e-06	1.59e-08	6.84	9.19927	0.233	cg09242181	LRP4	NM_002334	TSS1500	46940517	46940640	NC_000011.9
cg21697794	4.62e-06	1.59e-08	6.84	9.1977	0.128	cg21697794				30095269	30095392	NC_000006.11
cg26131286	4.65e-06	1.6e-08	6.83	9.18999	0.315	cg26131286				29521783	29521906	NC_000006.11
cg10432422	4.66e-06	1.61e-08	6.83	9.18572	0.181	cg10432422				17475819	17475942	NC_000001.10
cg00009038	4.68e-06	1.62e-08	6.83	9.18114	0.134	cg00009038				132152167	132152290	NC_000002.11
cg04883911	4.7e-06	1.63e-08	6.83	9.1754	0.237	cg04883911				208977452	208977575	NC_000002.11
cg22147446	4.7e-06	1.63e-08	6.83	9.17531	0.194	cg22147446	SLC23A2;SLC23A2	NM_203327;NM_005116	Body;Body	4879261	4879384	NC_000020.10
cg05525649	4.73e-06	1.64e-08	6.83	9.16908	0.209	cg05525649	PBX2	NM_002586	Body	32156269	32156392	NC_000006.11
cg20163033	4.74e-06	1.64e-08	6.83	9.16613	0.0957	cg20163033	FAM193A;FAM193A	NM_003704;NM_003704	1stExon;5'UTR	2627194	2627317	NC_000004.11
cg06936155	4.75e-06	1.65e-08	6.83	9.16368	0.202	cg06936155				91192451	91192574	NC_000001.10
cg00875989	4.75e-06	1.65e-08	6.83	9.1636	0.222	cg00875989				44774054	44774177	NC_000018.9
cg13581362	4.77e-06	1.66e-08	6.83	9.15702	0.132	cg13581362	MGC23270	NR_024396	TSS1500	105287326	105287449	NC_000014.8
cg27532360	4.78e-06	1.67e-08	6.82	9.15185	0.19	cg27532360	ITGA2B	NM_000419	Body	42452994	42453117	NC_000017.10
cg24974704	4.79e-06	1.67e-08	6.82	9.14909	0.254	cg24974704	ZC3H3	NM_015117	Body	144577238	144577361	NC_000008.10
cg17205324	4.81e-06	1.68e-08	6.82	9.14435	0.158	cg17205324	EFS;EFS	NM_032459;NM_005864	TSS1500;TSS1500	23835595	23835718	NC_000014.8
cg23715045	4.84e-06	1.69e-08	6.82	9.13895	0.218	cg23715045	VSIG2	NM_014312	Body	124621944	124622067	NC_000011.9
cg26568372	4.84e-06	1.69e-08	6.82	9.137	0.262	cg26568372				91190173	91190296	NC_000001.10
cg23194766	4.84e-06	1.69e-08	6.82	9.13596	0.311	cg23194766	PPP2R3A	NM_002718	TSS1500	135684107	135684230	NC_000003.11
cg14654637	4.84e-06	1.7e-08	6.82	9.1355	0.188	cg14654637	ZNF79	NM_007135	TSS1500	130185454	130185577	NC_000009.11
cg25001102	4.86e-06	1.7e-08	6.82	9.13045	0.307	cg25001102				221068935	221069058	NC_000001.10
cg02487331	4.86e-06	1.71e-08	6.82	9.12735	0.279	cg02487331				146550467	146550590	NC_000001.10
cg08200404	4.87e-06	1.72e-08	6.82	9.1237	0.229	cg08200404	C2CD4A	NM_207322	5'UTR	62359539	62359662	NC_000015.9
cg26289436	4.92e-06	1.74e-08	6.81	9.11226	0.282	cg26289436	CD37;CD37	NM_001040031;NM_001774	Body;Body	49841517	49841640	NC_000019.9
cg12017745	4.92e-06	1.74e-08	6.81	9.11165	0.23	cg12017745	EHBP1L1	NM_001099409	Body	65352327	65352450	NC_000011.9
cg17110920	4.92e-06	1.74e-08	6.81	9.1112	0.232	cg17110920	AHDC1	NM_001029882	5'UTR	27893925	27894048	NC_000001.10
cg01817009	4.92e-06	1.74e-08	6.81	9.10866	0.219	cg01817009	SLC12A4;SLC12A4;SLC12A4;LCAT;SLC12A4;SLC12A4	NM_001145962;NM_005072;NM_001145963;NM_000229;NM_001145961;NM_001145964	3'UTR;3'UTR;3'UTR;TSS200;3'UTR;3'UTR	67978182	67978305	NC_000016.9
cg07469445	4.92e-06	1.74e-08	6.81	9.10854	0.182	cg07469445	DIP2C;C10orf108;C10orf108	NM_014974;NR_027151;NR_027152	Body;Body;TSS200	695900	696023	NC_000010.10
cg26444528	4.98e-06	1.77e-08	6.81	9.09441	0.297	cg26444528	PCDH17	NM_001040429	1stExon	58207859	58207982	NC_000013.10
cg03886558	4.99e-06	1.77e-08	6.81	9.09086	0.268	cg03886558	ARHGAP9;ARHGAP9;ARHGAP9	NM_032496;NM_001080156;NM_001080157	Body;Body;Body	57869490	57869613	NC_000012.11
cg23181554	4.99e-06	1.77e-08	6.81	9.09052	0.197	cg23181554				134844443	134844566	NC_000010.10
cg07104958	4.99e-06	1.77e-08	6.81	9.09006	0.15	cg07104958	ANUBL1;ANUBL1	NM_001128324;NM_174890	TSS1500;TSS1500	46168551	46168674	NC_000010.10
cg04704294	4.99e-06	1.78e-08	6.81	9.08827	0.205	cg04704294	PDE4B;PDE4B	NM_002600;NM_001037341	TSS1500;TSS1500	66257822	66257945	NC_000001.10
cg13705556	5.01e-06	1.79e-08	6.8	9.08428	0.186	cg13705556	ZBTB7A	NM_015898	5'UTR	4058760	4058883	NC_000019.9
cg16563370	5.01e-06	1.79e-08	6.8	9.08366	0.203	cg16563370	SLFN13	NM_144682	TSS200	33775952	33776075	NC_000017.10
cg03355526	5.02e-06	1.79e-08	6.8	9.08031	0.112	cg03355526	ZNF454	NM_182594	5'UTR	178368415	178368538	NC_000005.9
cg10811426	5.02e-06	1.8e-08	6.8	9.0784	0.208	cg10811426				234667461	234667584	NC_000001.10
cg21593001	5.03e-06	1.8e-08	6.8	9.07634	0.211	cg21593001	DTX1	NM_004416	Body	113531060	113531183	NC_000012.11
cg01176141	5.04e-06	1.8e-08	6.8	9.07419	0.155	cg01176141	ANO1;ANO1	NM_018043;NR_030691	Body;Body	70023032	70023155	NC_000011.9
cg10334354	5.05e-06	1.81e-08	6.8	9.07222	0.095	cg10334354	EPHA5;EPHA5	NM_004439;NM_182472	Body;Body	66535203	66535326	NC_000004.11
cg05764628	5.05e-06	1.81e-08	6.8	9.07119	0.0957	cg05764628	SPTBN4	NM_020971	Body	41018759	41018882	NC_000019.9
cg23515921	5.05e-06	1.81e-08	6.8	9.07033	0.111	cg23515921	TBCD	NM_005993	Body	80747189	80747312	NC_000017.10
cg06275642	5.05e-06	1.81e-08	6.8	9.06991	0.169	cg06275642	CNRIP1;CNRIP1	NM_015463;NM_001111101	Body;Body	68546038	68546161	NC_000002.11
cg16030177	5.05e-06	1.81e-08	6.8	9.06831	0.185	cg16030177	IRF6	NM_006147	5'UTR	209979111	209979234	NC_000001.10
cg14636575	5.05e-06	1.82e-08	6.8	9.06756	0.283	cg14636575				2241256	2241379	NC_000009.11
cg08532569	5.05e-06	1.82e-08	6.8	9.06601	0.052	cg08532569	RBM9;RBM9	NM_001082578;NM_001082579	TSS200;TSS200	36424620	36424743	NC_000022.10
cg16109423	5.06e-06	1.82e-08	6.8	9.06518	0.174	cg16109423	DNALI1	NM_003462	Body	38022718	38022841	NC_000001.10
cg07817686	5.06e-06	1.82e-08	6.8	9.06433	0.264	cg07817686	PROM1;PROM1;PROM1	NM_001145848;NM_001145847;NM_001145847	5'UTR;1stExon;5'UTR	16085401	16085524	NC_000004.11
cg26440142	5.09e-06	1.84e-08	6.8	9.0546	0.212	cg26440142	HLX	NM_021958	Body	221057573	221057696	NC_000001.10
cg11523350	5.09e-06	1.84e-08	6.8	9.05455	0.27	cg11523350	BACE1;BACE1;BACE1;BACE1	NM_138972;NM_138971;NM_138973;NM_012104	Body;Body;Body;Body	117171073	117171196	NC_000011.9
cg21581504	5.1e-06	1.84e-08	6.79	9.05295	0.252	cg21581504	CNRIP1;CNRIP1	NM_015463;NM_001111101	Body;Body	68545960	68546083	NC_000002.11
cg18541254	5.1e-06	1.85e-08	6.79	9.05071	0.198	cg18541254				112709550	112709673	NC_000013.10
cg03387585	5.12e-06	1.85e-08	6.79	9.04658	0.3	cg03387585	KIRREL3;KIRREL3	NM_001161707;NM_032531	Body;Body	126455596	126455719	NC_000011.9
cg10537450	5.12e-06	1.86e-08	6.79	9.04383	0.171	cg10537450				147789973	147790096	NC_000001.10
cg15256491	5.13e-06	1.86e-08	6.79	9.0428	0.123	cg15256491	FOXK1	NM_001037165	Body	4729610	4729733	NC_000007.13
cg02698576	5.13e-06	1.87e-08	6.79	9.03991	0.232	cg02698576	SEMA6C	NM_030913	3'UTR	151104750	151104873	NC_000001.10
cg27553955	5.15e-06	1.88e-08	6.79	9.0351	0.159	cg27553955	KCNG3;KCNG3	NM_172344;NM_133329	1stExon;1stExon	42720326	42720449	NC_000002.11
cg10768564	5.15e-06	1.88e-08	6.79	9.03508	0.1	cg10768564	ZNF414;ZNF414	NM_032370;NM_001146175	3'UTR;Body	8576249	8576372	NC_000019.9
cg26477792	5.2e-06	1.9e-08	6.79	9.02463	0.193	cg26477792				30095277	30095400	NC_000006.11
cg06357685	5.2e-06	1.9e-08	6.79	9.02453	0.213	cg06357685	VAC14	NM_018052	Body	70812814	70812937	NC_000016.9
cg09568483	5.21e-06	1.91e-08	6.78	9.01879	0.157	cg09568483	PHF17;PHF17	NM_024900;NM_199320	Body;Body	129753010	129753133	NC_000004.11
cg23817893	5.21e-06	1.91e-08	6.78	9.01841	0.268	cg23817893	CCDC81;CCDC81;CCDC81;CCDC81	NM_001156474;NM_001156474;NM_021827;NM_021827	1stExon;5'UTR;1stExon;5'UTR	86085932	86086055	NC_000011.9
cg02699194	5.22e-06	1.91e-08	6.78	9.01761	0.161	cg02699194				241902062	241902185	NC_000002.11
cg25417675	5.22e-06	1.92e-08	6.78	9.01472	0.16	cg25417675				31651059	31651182	NC_000006.11
cg14906690	5.23e-06	1.92e-08	6.78	9.01381	0.185	cg14906690				76573506	76573629	NC_000010.10
cg07778900	5.23e-06	1.92e-08	6.78	9.013	0.177	cg07778900				43000890	43001013	NC_000005.9
cg02365945	5.23e-06	1.92e-08	6.78	9.01289	0.129	cg02365945	LOC407835	NR_002144	Body	128766374	128766497	NC_000007.13
cg14987431	5.25e-06	1.93e-08	6.78	9.00779	0.238	cg14987431				94455650	94455773	NC_000010.10
cg00782690	5.26e-06	1.93e-08	6.78	9.00468	0.216	cg00782690	GORASP2	NM_015530	Body	171822118	171822241	NC_000002.11
cg22637867	5.29e-06	1.95e-08	6.78	8.99668	0.264	cg22637867	ZNF709	NM_001145647	5'UTR	12624466	12624589	NC_000019.9
cg05353884	5.31e-06	1.96e-08	6.78	8.99386	0.225	cg05353884				26226203	26226326	NC_000006.11
cg19343518	5.33e-06	1.97e-08	6.78	8.9877	0.28	cg19343518	ARID1B;ARID1B;ARID1B	NM_017519;NM_175863;NM_020732	Body;Body;Body	157508679	157508802	NC_000006.11
cg23597015	5.33e-06	1.97e-08	6.78	8.98749	0.229	cg23597015	CORO2B	NM_006091	Body	68932319	68932442	NC_000015.9
cg11953775	5.33e-06	1.97e-08	6.78	8.98576	0.264	cg11953775				207597011	207597134	NC_000001.10
cg24769398	5.33e-06	1.98e-08	6.77	8.98367	0.239	cg24769398				188666022	188666145	NC_000003.11
cg21871232	5.34e-06	1.98e-08	6.77	8.98127	0.248	cg21871232	CLMN	NM_024734	Body	95693881	95694004	NC_000014.8
cg21653149	5.34e-06	1.98e-08	6.77	8.98092	0.27	cg21653149	ANKFY1;ANKFY1	NM_016376;NM_020740	Body;Body	4108148	4108271	NC_000017.10
cg10175795	5.36e-06	1.99e-08	6.77	8.97615	0.0732	cg10175795	TCERG1L	NM_174937	Body	133109194	133109317	NC_000010.10
cg16604035	5.37e-06	2e-08	6.77	8.97264	0.239	cg16604035	AHDC1	NM_001029882	3'UTR	27863299	27863422	NC_000001.10
cg11173941	5.4e-06	2.01e-08	6.77	8.96764	0.211	cg11173941	IRX2;IRX2	NM_033267;NM_001134222	Body;Body	2750203	2750326	NC_000005.9
cg14780632	5.41e-06	2.02e-08	6.77	8.9641	0.365	cg14780632	GAL3ST3;GAL3ST3	NM_033036;NM_033036	5'UTR;1stExon	65816521	65816644	NC_000011.9
cg24716664	5.42e-06	2.02e-08	6.77	8.96153	0.0821	cg24716664	AP2A2	NM_012305	Body	1006121	1006244	NC_000011.9
cg22144875	5.42e-06	2.02e-08	6.77	8.96115	0.238	cg22144875	OPA3	NM_001017989	Body	46032431	46032554	NC_000019.9
cg14218447	5.44e-06	2.03e-08	6.77	8.95645	0.223	cg14218447				113418004	113418127	NC_000003.11
cg03894892	5.45e-06	2.04e-08	6.77	8.95312	0.144	cg03894892				153445197	153445320	NC_000007.13
cg12594244	5.45e-06	2.04e-08	6.77	8.95308	0.163	cg12594244	LOXL1	NM_005576	TSS200	74218754	74218877	NC_000015.9
cg21949305	5.46e-06	2.04e-08	6.76	8.9507	0.209	cg21949305	C22orf45;ADORA2A	NR_028484;NM_000675	Body;5'UTR	24828655	24828778	NC_000022.10
cg20159871	5.47e-06	2.05e-08	6.76	8.94805	0.15	cg20159871	AK5;AK5	NM_174858;NM_012093	Body;Body	77864271	77864394	NC_000001.10
cg00376979	5.5e-06	2.06e-08	6.76	8.94042	0.251	cg00376979				34350727	34350850	NC_000021.8
cg04046629	5.5e-06	2.06e-08	6.76	8.94039	0.184	cg04046629	CD6	NM_006725	Body	60775831	60775954	NC_000011.9
cg04535902	5.5e-06	2.07e-08	6.76	8.93967	0.245	cg04535902	GFI1;GFI1;GFI1	NM_001127215;NM_001127216;NM_005263	Body;Body;Body	92947332	92947455	NC_000001.10
cg14395885	5.5e-06	2.07e-08	6.76	8.93885	0.312	cg14395885	DPM2	NM_003863	TSS200	130700923	130701046	NC_000009.11
cg13836098	5.5e-06	2.07e-08	6.76	8.93779	0.268	cg13836098	HIST1H3E	NM_003532	TSS200	26225268	26225391	NC_000006.11
cg03662049	5.5e-06	2.07e-08	6.76	8.93713	0.179	cg03662049				164204829	164204952	NC_000002.11
cg27282900	5.5e-06	2.07e-08	6.76	8.93698	0.296	cg27282900				30095258	30095381	NC_000006.11
cg11650460	5.5e-06	2.07e-08	6.76	8.93653	0.209	cg11650460	RAB35;RAB35	NM_006861;NM_001167606	Body;Body	120538792	120538915	NC_000012.11
cg15447787	5.5e-06	2.08e-08	6.76	8.93545	0.333	cg15447787				29967531	29967654	NC_000015.9
cg15487251	5.51e-06	2.08e-08	6.76	8.93443	0.253	cg15487251	IGF2BP2;IGF2BP2	NM_006548;NM_001007225	TSS1500;TSS1500	185544216	185544339	NC_000003.11
cg10660256	5.51e-06	2.08e-08	6.76	8.93303	0.253	cg10660256	BHMT;BHMT	NM_001713;NM_001713	5'UTR;1stExon	78407683	78407806	NC_000005.9
cg04517903	5.51e-06	2.08e-08	6.76	8.93258	0.153	cg04517903	TELO2	NM_016111	Body	1557605	1557728	NC_000016.9
cg08669954	5.54e-06	2.1e-08	6.76	8.92564	0.26	cg08669954	IFT140	NM_014714	Body	1582105	1582228	NC_000016.9
cg04570362	5.54e-06	2.1e-08	6.76	8.92414	0.156	cg04570362	CLSTN1;CLSTN1	NM_001009566;NM_014944	Body;Body	9871402	9871525	NC_000001.10
cg05081498	5.54e-06	2.1e-08	6.76	8.92276	0.307	cg05081498				190936289	190936412	NC_000004.11
cg22800233	5.54e-06	2.1e-08	6.76	8.9223	0.188	cg22800233				93805441	93805564	NC_000010.10
cg06607764	5.54e-06	2.1e-08	6.76	8.92225	0.318	cg06607764	CYTH1;CYTH1	NM_017456;NM_004762	Body;Body	76719635	76719758	NC_000017.10
cg11095383	5.55e-06	2.11e-08	6.76	8.91916	0.255	cg11095383	PCDHA1;PCDHA1;PCDHA2;PCDHA2	NM_031411;NM_018900;NM_031495;NM_018905	Body;Body;1stExon;1stExon	140174887	140175010	NC_000005.9
cg13681701	5.55e-06	2.11e-08	6.76	8.91908	0.141	cg13681701	SLC12A7	NM_006598	Body	1103910	1104033	NC_000005.9
cg24724506	5.56e-06	2.11e-08	6.76	8.91717	0.0978	cg24724506	ISOC2;ISOC2;ISOC2	NM_024710;NM_001136202;NM_001136201	3'UTR;3'UTR;3'UTR	55964383	55964506	NC_000019.9
cg26698460	5.56e-06	2.12e-08	6.75	8.91598	0.343	cg26698460	ZNF274;ZNF274;ZNF274	NM_133502;NM_016325;NM_016324	Body;Body;5'UTR	58716004	58716127	NC_000019.9
cg15424989	5.56e-06	2.12e-08	6.75	8.91566	0.183	cg15424989	GATA6	NM_005257	Body	19757468	19757591	NC_000018.9
cg19487738	5.56e-06	2.12e-08	6.75	8.91458	0.219	cg19487738				87785433	87785556	NC_000005.9
cg25492583	5.57e-06	2.12e-08	6.75	8.91246	0.151	cg25492583				53923046	53923169	NC_000017.10
cg01770755	5.57e-06	2.13e-08	6.75	8.91055	0.0881	cg01770755				41914122	41914245	NC_000015.9
cg15174623	5.57e-06	2.13e-08	6.75	8.91045	0.236	cg15174623				35494345	35494468	NC_000007.13
cg20470857	5.57e-06	2.13e-08	6.75	8.91032	0.105	cg20470857	C1QL2	NM_182528	1stExon	119915783	119915906	NC_000002.11
cg06708213	5.57e-06	2.13e-08	6.75	8.9089	0.153	cg06708213	MGAT5B	NM_144677	TSS1500	74864041	74864164	NC_000017.10
cg19062174	5.58e-06	2.14e-08	6.75	8.90672	0.264	cg19062174	GPD2;GPD2	NM_000408;NM_001083112	5'UTR;5'UTR	157323390	157323513	NC_000002.11
cg18067859	5.61e-06	2.15e-08	6.75	8.90085	0.213	cg18067859	SLFN13	NM_144682	TSS1500	33776345	33776468	NC_000017.10
cg14070162	5.62e-06	2.15e-08	6.75	8.89893	0.132	cg14070162	PTRF	NM_012232	TSS1500	40575582	40575705	NC_000017.10
cg26553501	5.62e-06	2.15e-08	6.75	8.89821	0.227	cg26553501				2145276	2145399	NC_000001.10
cg19789505	5.66e-06	2.18e-08	6.75	8.88813	0.221	cg19789505	OBSCN;OBSCN	NM_052843;NM_001098623	TSS1500;TSS1500	228394509	228394632	NC_000001.10
cg07636225	5.66e-06	2.18e-08	6.75	8.88789	0.297	cg07636225	RTN3;RTN3;RTN3;RTN3	NM_006054;NM_201428;NM_201429;NM_201430	Body;Body;Body;Body	63466987	63467110	NC_000011.9
cg05546763	5.66e-06	2.18e-08	6.75	8.88596	0.216	cg05546763				95983383	95983506	NC_000014.8
cg05711235	5.67e-06	2.19e-08	6.75	8.88414	0.284	cg05711235				65498612	65498735	NC_000008.10
cg17310600	5.67e-06	2.19e-08	6.74	8.88263	0.15	cg17310600		NM_001166373	TSS1500	165305334	165305457	NC_000004.11
cg08327367	5.67e-06	2.19e-08	6.74	8.88199	0.215	cg08327367	LRP4	NM_002334	Body	46934663	46934786	NC_000011.9
cg21488617	5.67e-06	2.19e-08	6.74	8.88134	0.178	cg21488617	DNALI1	NM_003462	1stExon	38022586	38022709	NC_000001.10
cg26702958	5.67e-06	2.19e-08	6.74	8.88126	0.25	cg26702958	FLJ41350	NR_029380	Body	102996254	102996377	NC_000010.10
cg16175703	5.67e-06	2.19e-08	6.74	8.88122	0.114	cg16175703				173106129	173106252	NC_000002.11
cg11049075	5.67e-06	2.19e-08	6.74	8.88004	0.226	cg11049075	HDAC5;HDAC5	NM_005474;NM_001015053	5'UTR;5'UTR	42199063	42199186	NC_000017.10
cg00059225	5.72e-06	2.22e-08	6.74	8.87031	0.159	cg00059225	GLRA1;GLRA1;GLRA1;GLRA1	NM_000171;NM_001146040;NM_000171;NM_001146040	1stExon;1stExon;5'UTR;5'UTR	151304357	151304480	NC_000005.9
cg00049729	5.74e-06	2.23e-08	6.74	8.86613	0.129	cg00049729				55776345	55776468	NC_000005.9
cg09827249	5.75e-06	2.23e-08	6.74	8.86312	0.118	cg09827249	VENTX	NM_014468	TSS200	135051256	135051379	NC_000010.10
cg02804819	5.76e-06	2.24e-08	6.74	8.86096	0.173	cg02804819	RASIP1	NM_017805	Body	49238364	49238487	NC_000019.9
cg00989365	5.76e-06	2.24e-08	6.74	8.85887	0.251	cg00989365				70014548	70014671	NC_000014.8
cg02672759	5.76e-06	2.25e-08	6.74	8.85678	0.211	cg02672759				39739058	39739181	NC_000019.9
cg18708986	5.76e-06	2.25e-08	6.74	8.85618	0.229	cg18708986				52652590	52652713	NC_000012.11
cg14972139	5.76e-06	2.25e-08	6.74	8.85606	0.308	cg14972139				168559456	168559579	NC_000006.11
cg25451194	5.76e-06	2.25e-08	6.74	8.85575	0.262	cg25451194	AHSA2	NM_152392	5'UTR	61407414	61407537	NC_000002.11
cg04956949	5.78e-06	2.26e-08	6.74	8.85251	0.204	cg04956949	STX1A;STX1A	NM_001165903;NM_004603	Body;Body	73119262	73119385	NC_000007.13
cg18184071	5.78e-06	2.26e-08	6.74	8.85186	0.34	cg18184071				149670096	149670219	NC_000001.10
cg22163674	5.78e-06	2.26e-08	6.74	8.85141	0.0567	cg22163674				41877442	41877565	NC_000015.9
cg19404813	5.78e-06	2.26e-08	6.74	8.84945	0.177	cg19404813	CRYGD	NM_006891	Body	208988932	208989055	NC_000002.11
cg06498267	5.81e-06	2.28e-08	6.73	8.84323	0.0995	cg06498267	HCN1	NM_021072	1stExon	45695922	45696045	NC_000005.9
cg22962123	5.83e-06	2.29e-08	6.73	8.84009	0.237	cg22962123	HOXA3;HOXA3;HOXA3;HOXA3	NM_153631;NM_153632;NM_030661;NM_153632	5'UTR;1stExon;5'UTR;5'UTR	27153605	27153728	NC_000007.13
cg12523932	5.85e-06	2.29e-08	6.73	8.83675	0.269	cg12523932	KLB	NM_175737	Body	39448653	39448776	NC_000004.11
cg13001097	5.85e-06	2.3e-08	6.73	8.83471	0.15	cg13001097	UTRN	NM_007124	Body	144652488	144652611	NC_000006.11
cg15238382	5.85e-06	2.3e-08	6.73	8.83363	0.152	cg15238382	DIO3;MIR1247	NM_001362;NR_031649	TSS200;TSS1500	102027514	102027637	NC_000014.8
cg09574757	5.87e-06	2.31e-08	6.73	8.82858	0.254	cg09574757	TBX1;TBX1;TBX1	NM_080646;NM_005992;NM_080647	5'UTR;5'UTR;5'UTR	19747024	19747147	NC_000022.10
cg18302225	5.87e-06	2.31e-08	6.73	8.82852	0.199	cg18302225				55776401	55776524	NC_000005.9
cg01433654	5.88e-06	2.32e-08	6.73	8.82417	0.271	cg01433654	ARL15	NM_019087	Body	53605192	53605315	NC_000005.9
cg00868875	5.89e-06	2.33e-08	6.73	8.82162	0.242	cg00868875	KCTD1;KCTD1;KCTD1	NM_001136205;NM_198991;NM_001142730	5'UTR;5'UTR;1stExon	24127237	24127360	NC_000018.9
cg04360793	5.89e-06	2.33e-08	6.73	8.82106	0.342	cg04360793	ELTD1;ELTD1	NM_022159;NM_022159	5'UTR;1stExon	79472361	79472484	NC_000001.10
cg02447879	5.89e-06	2.33e-08	6.73	8.82047	0.254	cg02447879	BAHCC1	NM_001080519	Body	79393682	79393805	NC_000017.10
cg10848373	5.9e-06	2.34e-08	6.73	8.81841	0.239	cg10848373	KCNJ6	NM_002240	Body	39047855	39047978	NC_000021.8
cg14620572	5.92e-06	2.34e-08	6.73	8.81597	0.185	cg14620572	GPR144	NM_001161808	Body	127215669	127215792	NC_000009.11
cg00157572	5.92e-06	2.34e-08	6.73	8.8154	0.24	cg00157572	SIX6	NM_007374	Body	60977961	60978084	NC_000014.8
cg19664945	5.92e-06	2.35e-08	6.72	8.8139	0.233	cg19664945	LOC100302652;GPR75	NM_001164165;NM_006794	TSS200;TSS1500	54087343	54087466	NC_000002.11
cg07363961	5.92e-06	2.35e-08	6.72	8.81324	0.174	cg07363961				539880	540003	NC_000005.9
cg12451530	5.95e-06	2.36e-08	6.72	8.80841	0.204	cg12451530	LOC100302652;GPR75	NM_001164165;NM_006794	TSS200;TSS200	54087209	54087332	NC_000002.11
cg14262681	5.97e-06	2.37e-08	6.72	8.80355	0.45	cg14262681				21084420	21084543	NC_000020.10
cg16596052	5.99e-06	2.38e-08	6.72	8.79923	0.378	cg16596052	RGS10;RGS10	NM_001005339;NM_002925	Body;Body	121271746	121271869	NC_000010.10
cg04513227	5.99e-06	2.38e-08	6.72	8.79911	0.141	cg04513227	GPATCH1	NM_018025	TSS200	33571656	33571779	NC_000019.9
cg05212260	6.02e-06	2.39e-08	6.72	8.79379	0.211	cg05212260				39791766	39791889	NC_000017.10
cg06825512	6.02e-06	2.4e-08	6.72	8.79316	0.252	cg06825512	APCDD1	NM_153000	TSS1500	10453969	10454092	NC_000018.9
cg01514538	6.02e-06	2.4e-08	6.72	8.79306	0.16	cg01514538	FLJ42875	NR_015440	Body	2980380	2980503	NC_000001.10
cg14016177	6.03e-06	2.4e-08	6.72	8.79083	0.148	cg14016177				131965610	131965733	NC_000009.11
cg16701059	6.03e-06	2.4e-08	6.72	8.7903	0.204	cg16701059	LRRK1	NM_024652	Body	101513798	101513921	NC_000015.9
cg17375267	6.04e-06	2.41e-08	6.72	8.78776	0.121	cg17375267	CCDC8	NM_032040	1stExon	46915776	46915899	NC_000019.9
cg01401037	6.04e-06	2.41e-08	6.72	8.78761	0.204	cg01401037				185839955	185840078	NC_000003.11
cg05710651	6.04e-06	2.41e-08	6.72	8.78633	0.128	cg05710651	CTBP1;CTBP1	NM_001328;NM_001012614	Body;Body	1208737	1208860	NC_000004.11
cg25810938	6.05e-06	2.42e-08	6.72	8.78435	0.254	cg25810938	ANKMY1;ANKMY1	NM_016552;NM_017844	5'UTR;5'UTR	241497060	241497183	NC_000002.11
cg11929842	6.06e-06	2.43e-08	6.72	8.78118	0.159	cg11929842	SYTL1	NM_032872	Body	27677872	27677995	NC_000001.10
cg23906454	6.09e-06	2.44e-08	6.71	8.77548	0.213	cg23906454	LACE1	NM_145315	Body	108785671	108785794	NC_000006.11
cg18262801	6.09e-06	2.44e-08	6.71	8.77465	0.124	cg18262801	FHOD1	NM_013241	Body	67270860	67270983	NC_000016.9
cg23401445	6.09e-06	2.45e-08	6.71	8.77294	0.193	cg23401445				113442419	113442542	NC_000004.11
cg27534599	6.11e-06	2.46e-08	6.71	8.76831	0.285	cg27534599	CECR1;CECR1;CECR1	NM_017424;NM_177405;NM_177405	Body;1stExon;5'UTR	17680477	17680600	NC_000022.10
cg07044859	6.12e-06	2.46e-08	6.71	8.76564	0.209	cg07044859				101282883	101283006	NC_000010.10
cg07856667	6.15e-06	2.48e-08	6.71	8.7598	0.168	cg07856667				94455710	94455833	NC_000010.10
cg01363714	6.18e-06	2.49e-08	6.71	8.75505	0.273	cg01363714				103655773	103655896	NC_000014.8
cg09265955	6.19e-06	2.5e-08	6.71	8.75279	0.0855	cg09265955				149231052	149231175	NC_000001.10
cg03743720	6.21e-06	2.51e-08	6.71	8.74847	0.226	cg03743720	ANKMY1;ANKMY1	NM_017844;NM_016552	Body;Body	241460002	241460125	NC_000002.11
cg25987194	6.21e-06	2.51e-08	6.71	8.74798	0.241	cg25987194	SLC26A4;LOC286002	NM_000441;NR_028137	5'UTR;Body	107301566	107301689	NC_000007.13
cg13843840	6.23e-06	2.52e-08	6.7	8.74438	0.166	cg13843840	ZMIZ1	NM_020338	Body	80963128	80963251	NC_000010.10
cg07145284	6.24e-06	2.53e-08	6.7	8.7404	0.252	cg07145284	CD248	NM_020404	TSS200	66084631	66084754	NC_000011.9
cg04715649	6.24e-06	2.53e-08	6.7	8.74016	0.229	cg04715649	CDC42BPB	NM_006035	Body	103416122	103416245	NC_000014.8
cg04211115	6.26e-06	2.54e-08	6.7	8.73538	0.118	cg04211115	HS3ST3A1	NM_006042	1stExon	13504008	13504131	NC_000017.10
cg20752683	6.26e-06	2.54e-08	6.7	8.7352	0.23	cg20752683				29218208	29218331	NC_000003.11
cg24935332	6.26e-06	2.55e-08	6.7	8.73303	0.254	cg24935332				31846819	31846942	NC_000011.9
cg25428429	6.26e-06	2.55e-08	6.7	8.73172	0.304	cg25428429	KIAA0240;KIAA0240	NM_015349;NM_015349	5'UTR;1stExon	42788831	42788954	NC_000006.11
cg09024023	6.3e-06	2.57e-08	6.7	8.72456	0.185	cg09024023	PHF21A;PHF21A	NM_016621;NM_001101802	Body;Body	46105316	46105439	NC_000011.9
cg25227866	6.3e-06	2.57e-08	6.7	8.72344	0.277	cg25227866	SDK2	NM_001144952	Body	71489530	71489653	NC_000017.10
cg08841552	6.31e-06	2.57e-08	6.7	8.72209	0.168	cg08841552	PNPLA7;PNPLA7	NM_152286;NM_001098537	Body;Body	140444378	140444501	NC_000009.11
cg06533314	6.32e-06	2.58e-08	6.7	8.72005	0.179	cg06533314				91176810	91176933	NC_000001.10
cg20034792	6.32e-06	2.59e-08	6.7	8.71801	0.36	cg20034792				29521781	29521904	NC_000006.11
cg07028396	6.34e-06	2.59e-08	6.7	8.71493	0.226	cg07028396				93805682	93805805	NC_000010.10
cg19049837	6.36e-06	2.6e-08	6.69	8.7112	0.193	cg19049837				85293337	85293460	NC_000002.11
cg26784011	6.38e-06	2.62e-08	6.69	8.70644	0.239	cg26784011				21497842	21497965	NC_000020.10
cg00862117	6.38e-06	2.62e-08	6.69	8.70597	0.113	cg00862117	IQSEC3	NM_001170738	1stExon	176111	176234	NC_000012.11
cg27454064	6.39e-06	2.62e-08	6.69	8.7038	0.267	cg27454064				64215611	64215734	NC_000012.11
cg01681698	6.4e-06	2.63e-08	6.69	8.7012	0.113	cg01681698	DEXI;DEXI	NM_014015;NM_014015	3'UTR;1stExon	11035542	11035665	NC_000016.9
cg05525798	6.41e-06	2.64e-08	6.69	8.69903	0.11	cg05525798	TBCD	NM_005993	Body	80747193	80747316	NC_000017.10
cg20250981	6.41e-06	2.64e-08	6.69	8.69866	0.207	cg20250981	KCNQ1DN	NR_024627	TSS1500	2890644	2890767	NC_000011.9
cg10372921	6.41e-06	2.64e-08	6.69	8.69805	0.201	cg10372921	LOXL1	NM_005576	TSS200	74218733	74218856	NC_000015.9
cg03085312	6.42e-06	2.64e-08	6.69	8.6964	0.225	cg03085312	RARA	NM_000964	TSS200	38465281	38465404	NC_000017.10
cg16572603	6.43e-06	2.65e-08	6.69	8.69345	0.141	cg16572603	PCDHGA2;PCDHGA3;PCDHGA3;PCDHGA1	NM_018915;NM_018916;NM_032011;NM_018912	Body;1stExon;1stExon;Body	140725235	140725358	NC_000005.9
cg19713567	6.43e-06	2.65e-08	6.69	8.69326	0.26	cg19713567	GRB7;GRB7	NM_005310;NM_001030002	5'UTR;5'UTR	37895429	37895552	NC_000017.10
cg14923398	6.43e-06	2.65e-08	6.69	8.69183	0.181	cg14923398				28567787	28567910	NC_000002.11
cg13392957	6.44e-06	2.66e-08	6.69	8.68865	0.201	cg13392957				147782279	147782402	NC_000001.10
cg14384093	6.44e-06	2.66e-08	6.69	8.68842	0.27	cg14384093	C9orf5	NM_032012	Body	111878565	111878688	NC_000009.11
cg26214742	6.44e-06	2.66e-08	6.69	8.68816	0.251	cg26214742	H2AFY;H2AFY;H2AFY;H2AFY	NM_138610;NM_138609;NM_004893;NM_001040158	TSS1500;TSS1500;TSS1500;TSS1500	134735914	134736037	NC_000005.9
cg01024168	6.44e-06	2.67e-08	6.69	8.68784	0.256	cg01024168	MIR196B	NR_029911	TSS200	27209281	27209404	NC_000007.13
cg13451356	6.44e-06	2.67e-08	6.69	8.68718	0.203	cg13451356				40598648	40598771	NC_000001.10
cg23244095	6.45e-06	2.68e-08	6.69	8.68433	0.139	cg23244095	C1orf70	NM_001114748	TSS1500	1476269	1476392	NC_000001.10
cg06931444	6.45e-06	2.68e-08	6.69	8.68417	0.26	cg06931444				129874054	129874177	NC_000008.10
cg14346046	6.46e-06	2.69e-08	6.69	8.68051	0.268	cg14346046	LGR4	NM_018490	TSS1500	27494792	27494915	NC_000011.9
cg26352161	6.46e-06	2.69e-08	6.69	8.68018	0.245	cg26352161	PTK7;PTK7;PTK7;PTK7	NM_002821;NM_152881;NM_152882;NM_152880	Body;Body;Body;Body	43071742	43071865	NC_000006.11
cg24903144	6.51e-06	2.71e-08	6.68	8.67169	0.155	cg24903144	PAX2;PAX2;PAX2;PAX2;PAX2	NM_000278;NM_003987;NM_003989;NM_003988;NM_003990	Body;Body;Body;Body;Body	102509268	102509391	NC_000010.10
cg18106925	6.53e-06	2.72e-08	6.68	8.66794	0.124	cg18106925				145092485	145092608	NC_000001.10
cg14468280	6.54e-06	2.73e-08	6.68	8.66566	0.278	cg14468280	ZNFX1	NM_021035	3'UTR	47862976	47863099	NC_000020.10
cg03015498	6.54e-06	2.73e-08	6.68	8.66559	0.265	cg03015498				7517765	7517888	NC_000010.10
cg07274716	6.54e-06	2.73e-08	6.68	8.66519	0.297	cg07274716	PITX1	NM_002653	3'UTR	134363973	134364096	NC_000005.9
cg27563032	6.55e-06	2.74e-08	6.68	8.66206	0.0921	cg27563032				148000392	148000515	NC_000001.10
cg17112958	6.58e-06	2.76e-08	6.68	8.65475	0.272	cg17112958	LYPD1;LYPD1	NM_001077427;NM_144586	5'UTR;Body	133426934	133427057	NC_000002.11
cg12478578	6.61e-06	2.77e-08	6.68	8.64941	0.11	cg12478578	KIAA1522	NM_020888	Body	33231306	33231429	NC_000001.10
cg14315054	6.62e-06	2.77e-08	6.68	8.64832	0.264	cg14315054				221068730	221068853	NC_000001.10
cg07755735	6.62e-06	2.78e-08	6.68	8.6467	0.193	cg07755735	GDF7	NM_182828	Body	20870362	20870485	NC_000002.11
cg05958582	6.62e-06	2.78e-08	6.68	8.64635	0.132	cg05958582	PKD2L1	NM_016112	TSS200	102090366	102090489	NC_000010.10
cg25117523	6.66e-06	2.8e-08	6.67	8.6394	0.281	cg25117523	CYTH1;CYTH1	NM_017456;NM_004762	Body;Body	76719640	76719763	NC_000017.10
cg07496545	6.66e-06	2.8e-08	6.67	8.63856	0.309	cg07496545	SLC25A2	NM_031947	TSS200	140683737	140683860	NC_000005.9
cg08293075	6.67e-06	2.81e-08	6.67	8.63673	0.147	cg08293075	PBX2	NM_002586	Body	32156294	32156417	NC_000006.11
cg06639320	6.69e-06	2.82e-08	6.67	8.63387	0.134	cg06639320	FHL2;FHL2;FHL2;FHL2	NM_001039492;NM_001450;NM_201557;NM_201555	TSS200;TSS200;5'UTR;TSS200	106015739	106015862	NC_000002.11
cg19329160	6.69e-06	2.82e-08	6.67	8.63317	0.221	cg19329160				79182095	79182218	NC_000013.10
cg18560551	6.7e-06	2.82e-08	6.67	8.6307	0.271	cg18560551	EHF	NM_012153	5'UTR	34654233	34654356	NC_000011.9
cg01071644	6.7e-06	2.83e-08	6.67	8.62904	0.172	cg01071644	QSOX2	NM_181701	TSS1500	139138751	139138874	NC_000009.11
cg15883603	6.7e-06	2.83e-08	6.67	8.62845	0.249	cg15883603	SORBS2;SORBS2;SORBS2;SORBS2;SORBS2;SORBS2	NM_003603;NM_021069;NM_001145670;NM_001145671;NM_001145672;NM_001145673	5'UTR;5'UTR;5'UTR;5'UTR;5'UTR;5'UTR	186622408	186622531	NC_000004.11
cg20996314	6.7e-06	2.83e-08	6.67	8.62835	0.168	cg20996314	HR;HR	NM_018411;NM_005144	TSS1500;TSS1500	21989292	21989415	NC_000008.10
cg07967679	6.7e-06	2.83e-08	6.67	8.62829	0.258	cg07967679	KRT7	NM_005556	TSS200	52626814	52626937	NC_000012.11
cg00183886	6.7e-06	2.83e-08	6.67	8.62816	0.239	cg00183886	USP46	NM_022832	Body	53524296	53524419	NC_000004.11
cg24376793	6.71e-06	2.84e-08	6.67	8.62665	0.243	cg24376793	PPP1R12B;PPP1R12B;PPP1R12B;PPP1R12B	NM_032105;NM_002481;NM_032104;NM_032103	3'UTR;Body;3'UTR;Body	202545589	202545712	NC_000001.10
cg06563089	6.74e-06	2.86e-08	6.67	8.61834	0.27	cg06563089	KCNC2;KCNC2;KCNC2	NM_139137;NM_153748;NM_139136	Body;Body;Body	75601157	75601280	NC_000012.11
cg10771650	6.74e-06	2.86e-08	6.67	8.61795	0.157	cg10771650	DDR1	NM_001954	TSS1500	30850405	30850528	NC_000006.11
cg00024086	6.74e-06	2.86e-08	6.67	8.61787	0.25	cg00024086				156814491	156814614	NC_000007.13
cg24304093	6.8e-06	2.89e-08	6.66	8.60654	0.312	cg24304093				14926738	14926861	NC_000011.9
cg10856875	6.8e-06	2.89e-08	6.66	8.60631	0.178	cg10856875	HSPA2	NM_021979	1stExon	65008641	65008764	NC_000014.8
cg09547119	6.8e-06	2.9e-08	6.66	8.60595	0.196	cg09547119	ZNF577;ZNF577;ZNF577	NR_024181;NM_032679;NM_001135590	TSS200;TSS200;TSS200	52391367	52391490	NC_000019.9
cg18998911	6.8e-06	2.9e-08	6.66	8.60502	0.257	cg18998911	TAGLN3;TAGLN3;TAGLN3;TAGLN3	NM_001008273;NM_001008272;NM_001008273;NM_013259	1stExon;5'UTR;5'UTR;5'UTR	111718245	111718368	NC_000003.11
cg04917197	6.81e-06	2.9e-08	6.66	8.60382	0.186	cg04917197				112290331	112290454	NC_000010.10
cg06759518	6.81e-06	2.91e-08	6.66	8.60275	0.119	cg06759518	RYBP	NM_012234	TSS1500	72496799	72496922	NC_000003.11
cg10755899	6.82e-06	2.91e-08	6.66	8.60156	0.157	cg10755899				1772151	1772274	NC_000004.11
cg04242728	6.84e-06	2.92e-08	6.66	8.59643	0.209	cg04242728	TBC1D24	NM_020705	5'UTR	2536153	2536276	NC_000016.9
cg17337483	6.84e-06	2.93e-08	6.66	8.59426	0.199	cg17337483				135436467	135436590	NC_000010.10
cg27020216	6.84e-06	2.93e-08	6.66	8.59424	0.221	cg27020216	SGEF	NM_015595	Body	153840347	153840470	NC_000003.11
cg13334727	6.84e-06	2.93e-08	6.66	8.59324	0.157	cg13334727	SEPT8;SEPT8;SEPT8;SEPT8	NM_001098813;NM_015146;NM_001098812;NM_001098811	TSS200;TSS1500;TSS1500;TSS1500	132113601	132113724	NC_000005.9
cg03997176	6.88e-06	2.95e-08	6.66	8.5871	0.26	cg03997176	HLA-G	NM_002127	Body	29796066	29796189	NC_000006.11
cg08885800	6.88e-06	2.96e-08	6.66	8.58583	0.191	cg08885800				201084119	201084242	NC_000001.10
cg24522254	6.88e-06	2.96e-08	6.66	8.58515	0.301	cg24522254				174878113	174878236	NC_000002.11
cg22489957	6.89e-06	2.96e-08	6.66	8.58407	0.235	cg22489957				28921805	28921928	NC_000006.11
cg07799299	6.89e-06	2.96e-08	6.66	8.5834	0.362	cg07799299	ASAP1	NM_018482	Body	131344855	131344978	NC_000008.10
cg00332937	6.89e-06	2.97e-08	6.66	8.58193	0.304	cg00332937				72740460	72740583	NC_000005.9
cg22085751	6.89e-06	2.97e-08	6.66	8.58104	0.258	cg22085751				28921976	28922099	NC_000006.11
cg16723488	6.89e-06	2.97e-08	6.66	8.58038	0.202	cg16723488	APOB	NM_000384	TSS200	21266947	21267070	NC_000002.11
cg19983775	6.91e-06	2.98e-08	6.66	8.57705	0.194	cg19983775	OAT	NM_000274	5'UTR	126104239	126104362	NC_000010.10
cg06174989	6.92e-06	2.99e-08	6.66	8.57496	0.188	cg06174989	LOC100130015;LOC100130015	NR_027335;NR_027336	TSS1500;TSS1500	90114523	90114646	NC_000016.9
cg17653886	6.92e-06	2.99e-08	6.65	8.57362	0.184	cg17653886	SLFN13	NM_144682	TSS1500	33776116	33776239	NC_000017.10
cg08057985	6.93e-06	3e-08	6.65	8.57154	0.111	cg08057985	FAM109B	NM_001002034	TSS200	42470123	42470246	NC_000022.10
cg10816169	6.94e-06	3e-08	6.65	8.56962	0.132	cg10816169				66080868	66080991	NC_000011.9
cg14489474	6.94e-06	3.01e-08	6.65	8.56831	0.22	cg14489474	ADCYAP1;ADCYAP1	NM_001099733;NM_001117	Body;Body	905611	905734	NC_000018.9
cg10095954	6.94e-06	3.01e-08	6.65	8.56764	0.21	cg10095954	ATP2A3;ATP2A3;ATP2A3;ATP2A3;ATP2A3;ATP2A3;ATP2A3	NM_174954;NM_174955;NM_174956;NM_174957;NM_174953;NM_174958;NM_005173	Body;Body;Body;Body;Body;Body;Body	3848324	3848447	NC_000017.10
cg26419378	6.96e-06	3.02e-08	6.65	8.5644	0.152	cg26419378	TRIO	NM_007118	Body	14299110	14299233	NC_000005.9
cg19509778	6.96e-06	3.02e-08	6.65	8.56317	0.145	cg19509778	FOXI2	NM_207426	3'UTR	129537308	129537431	NC_000010.10
cg04359602	6.99e-06	3.04e-08	6.65	8.55842	0.231	cg04359602	NDRG2;NDRG2;NDRG2;NDRG2;NDRG2;NDRG2;NDRG2;NDRG2	NM_201539;NM_201535;NM_201538;NM_201541;NM_201540;NM_201536;NM_016250;NM_201537	TSS1500;TSS1500;TSS1500;TSS1500;TSS1500;TSS1500;TSS1500;TSS1500	21494547	21494670	NC_000014.8
cg24854681	6.99e-06	3.04e-08	6.65	8.55701	0.196	cg24854681	MCM7;MCM7;MIR25	NM_005916;NM_182776;NR_029498	Body;Body;TSS200	99691314	99691437	NC_000007.13
cg21238818	7.02e-06	3.06e-08	6.65	8.55219	0.175	cg21238818	GAL3ST3;GAL3ST3	NM_033036;NM_033036	5'UTR;1stExon	65816642	65816765	NC_000011.9
cg14134256	7.03e-06	3.06e-08	6.65	8.55	0.191	cg14134256	AMOTL1	NM_130847	Body	94502879	94503002	NC_000011.9
cg08350047	7.05e-06	3.08e-08	6.65	8.54466	0.153	cg08350047				50278722	50278845	NC_000016.9
cg14749448	7.07e-06	3.1e-08	6.64	8.53963	0.053	cg14749448	LTBP3;LTBP3;LTBP3	NM_001164266;NM_021070;NM_001130144	TSS200;TSS200;TSS200	65325872	65325995	NC_000011.9
cg14515614	7.07e-06	3.1e-08	6.64	8.53936	0.215	cg14515614	COL27A1	NM_032888	Body	116969440	116969563	NC_000009.11
cg20463302	7.07e-06	3.1e-08	6.64	8.53911	0.134	cg20463302	SH3D20	NM_174919	Body	43507153	43507276	NC_000017.10
cg07340580	7.08e-06	3.1e-08	6.64	8.53705	0.216	cg07340580	SLC26A4;LOC286002;SLC26A4	NM_000441;NR_028137;NM_000441	5'UTR;Body;1stExon	107301288	107301411	NC_000007.13
cg00818106	7.1e-06	3.12e-08	6.64	8.53322	0.218	cg00818106	PWWP2B;PWWP2B	NM_138499;NM_001098637	3'UTR;Body	134221503	134221626	NC_000010.10
cg22236066	7.1e-06	3.12e-08	6.64	8.53302	0.253	cg22236066				103742123	103742246	NC_000008.10
cg19524238	7.1e-06	3.12e-08	6.64	8.53235	0.325	cg19524238	GNA12	NM_007353	Body	2802976	2803099	NC_000007.13
cg11825603	7.11e-06	3.12e-08	6.64	8.53126	0.204	cg11825603	LUZP1;LUZP1	NM_033631;NM_001142546	5'UTR;5'UTR	23449368	23449491	NC_000001.10
cg00782645	7.14e-06	3.14e-08	6.64	8.52577	0.148	cg00782645	LOC100130015;LOC100130015	NR_027335;NR_027336	TSS1500;TSS1500	90115048	90115171	NC_000016.9
cg25317941	7.14e-06	3.14e-08	6.64	8.5243	0.114	cg25317941	ECEL1	NM_004826	Body	233351153	233351276	NC_000002.11
cg24864413	7.14e-06	3.15e-08	6.64	8.52411	0.244	cg24864413	SLC22A1;SLC22A1	NM_153187;NM_003057	TSS200;TSS200	160542732	160542855	NC_000006.11
cg19111287	7.17e-06	3.17e-08	6.64	8.51773	0.18	cg19111287	RGS12;RGS12;RGS12	NM_198229;NM_198227;NM_002926	Body;Body;Body	3372915	3373038	NC_000004.11
cg08654960	7.17e-06	3.17e-08	6.64	8.51766	0.288	cg08654960				85319859	85319982	NC_000016.9
cg02782840	7.21e-06	3.19e-08	6.64	8.51156	0.279	cg02782840				25290701	25290824	NC_000013.10
cg04623265	7.25e-06	3.2e-08	6.64	8.50617	0.153	cg04623265				224363494	224363617	NC_000001.10
cg17743250	7.26e-06	3.21e-08	6.63	8.50408	0.233	cg17743250	CYP26C1	NM_183374	TSS200	94820927	94821050	NC_000010.10
cg20453820	7.26e-06	3.21e-08	6.63	8.50281	0.302	cg20453820				10253743	10253866	NC_000012.11
cg17624073	7.31e-06	3.24e-08	6.63	8.49427	0.168	cg17624073	BAHCC1	NM_001080519	Body	79393583	79393706	NC_000017.10
cg20792436	7.31e-06	3.24e-08	6.63	8.49416	0.288	cg20792436	ASPSCR1	NM_024083	Body	79972570	79972693	NC_000017.10
cg17478979	7.32e-06	3.25e-08	6.63	8.49257	0.276	cg17478979	ZC3H12D	NM_207360	Body	149772150	149772273	NC_000006.11
cg04439215	7.32e-06	3.26e-08	6.63	8.48978	0.266	cg04439215	KCTD4;GTF2F2	NM_198404;NM_004128	5'UTR;Body	45768901	45769024	NC_000013.10
cg15951661	7.32e-06	3.26e-08	6.63	8.48972	0.253	cg15951661	MAP3K9	NM_033141	TSS1500	71277141	71277264	NC_000014.8
cg03600270	7.33e-06	3.26e-08	6.63	8.48816	0.128	cg03600270	FHOD1	NM_013241	Body	67271174	67271297	NC_000016.9
cg06875255	7.34e-06	3.27e-08	6.63	8.48705	0.191	cg06875255	DYSF;DYSF;DYSF;DYSF;DYSF;DYSF;DYSF;DYSF;DYSF;DYSF;DYSF;DYSF;DYSF;DYSF	NM_001130455;NM_001130979;NM_001130980;NM_001130982;NM_001130976;NM_001130987;NM_001130986;NM_001130981;NM_001130984;NM_001130983;NM_001130978;NM_001130985;NM_003494;NM_001130977	Body;Body;Body;Body;Body;Body;Body;Body;Body;Body;Body;Body;Body;Body	71787827	71787950	NC_000002.11
cg00424354	7.34e-06	3.27e-08	6.63	8.48553	0.274	cg00424354				100555339	100555462	NC_000011.9
cg03332469	7.34e-06	3.27e-08	6.63	8.48471	0.222	cg03332469				156796967	156797090	NC_000007.13
cg10806820	7.35e-06	3.28e-08	6.63	8.48231	0.0928	cg10806820	CELSR3	NM_001407	1stExon	48699090	48699213	NC_000003.11
cg04112058	7.35e-06	3.28e-08	6.63	8.48168	0.145	cg04112058	SHCBP1	NM_024745	Body	46648124	46648247	NC_000016.9
cg04085768	7.36e-06	3.29e-08	6.63	8.47897	0.174	cg04085768	ALPK1;ALPK1	NM_025144;NM_001102406	Body;Body	113333052	113333175	NC_000004.11
cg01047586	7.36e-06	3.29e-08	6.63	8.4787	0.344	cg01047586				176933407	176933530	NC_000002.11
cg07575373	7.4e-06	3.32e-08	6.63	8.47197	0.181	cg07575373	CD37;CD37	NM_001040031;NM_001774	Body;Body	49842188	49842311	NC_000019.9
cg11789885	7.41e-06	3.33e-08	6.62	8.46882	0.107	cg11789885	LPPR2;LPPR2	NM_022737;NM_001170635	Body;Body	11472731	11472854	NC_000019.9
cg11671688	7.42e-06	3.33e-08	6.62	8.46741	0.262	cg11671688	GPR6	NM_005284	1stExon	110301075	110301198	NC_000006.11
cg06490225	7.43e-06	3.34e-08	6.62	8.46344	0.232	cg06490225	LHX1	NM_005568	Body	35298825	35298948	NC_000017.10
cg12993163	7.43e-06	3.35e-08	6.62	8.46287	0.288	cg12993163	SHOX2;SHOX2;SHOX2	NM_001163678;NM_006884;NM_003030	Body;Body;Body	157821407	157821530	NC_000003.11
cg25212131	7.47e-06	3.37e-08	6.62	8.45695	0.186	cg25212131	SLC25A2	NM_031947	TSS200	140683670	140683793	NC_000005.9
cg18303477	7.47e-06	3.37e-08	6.62	8.45547	0.177	cg18303477				94180046	94180169	NC_000010.10
cg11763509	7.48e-06	3.38e-08	6.62	8.4542	0.229	cg11763509	BMP8A	NM_181809	Body	39958005	39958128	NC_000001.10
cg14507337	7.49e-06	3.38e-08	6.62	8.45161	0.329	cg14507337	SIX6	NM_007374	3'UTR	60978161	60978284	NC_000014.8
cg04157161	7.51e-06	3.4e-08	6.62	8.44803	0.207	cg04157161	GUCY2D	NM_000180	Body	7906847	7906970	NC_000017.10
cg08516817	7.51e-06	3.4e-08	6.62	8.44771	0.244	cg08516817	WDR52;WDR52	NM_018338;NM_001164496	TSS1500;TSS1500	113160623	113160746	NC_000003.11
cg06997549	7.51e-06	3.4e-08	6.62	8.44621	0.205	cg06997549	NRIP2;NRIP2	NM_031474;NM_031474	5'UTR;1stExon	2944163	2944286	NC_000012.11
cg20779964	7.52e-06	3.41e-08	6.62	8.44397	0.223	cg20779964	CBLN4	NM_080617	TSS200	54580070	54580193	NC_000020.10
cg02794984	7.53e-06	3.42e-08	6.62	8.44119	0.234	cg02794984	KCNH4	NM_012285	Body	40332140	40332263	NC_000017.10
cg03577139	7.53e-06	3.43e-08	6.62	8.43915	0.257	cg03577139	SOD3	NM_003102	TSS200	24796988	24797111	NC_000004.11
cg13569051	7.56e-06	3.44e-08	6.61	8.43544	0.191	cg13569051	GSN;GSN;GSN;GSN;GSN;GSN;GSN	NM_001127664;NM_001127667;NM_001127662;NM_198252;NM_001127665;NM_001127663;NM_001127666	5'UTR;5'UTR;5'UTR;5'UTR;5'UTR;5'UTR;5'UTR	124051703	124051826	NC_000009.11
cg06839111	7.56e-06	3.44e-08	6.61	8.43517	0.177	cg06839111	SLC12A4;SLC12A4;SLC12A4;SLC12A4;SLC12A4;LCAT	NM_001145962;NM_005072;NM_001145963;NM_001145961;NM_001145964;NM_000229	3'UTR;3'UTR;3'UTR;3'UTR;3'UTR;TSS1500	67978450	67978573	NC_000016.9
cg22160472	7.56e-06	3.44e-08	6.61	8.43438	0.199	cg22160472				42944494	42944617	NC_000005.9
cg10124807	7.57e-06	3.45e-08	6.61	8.43226	0.138	cg10124807				149231118	149231241	NC_000001.10
cg16014085	7.58e-06	3.46e-08	6.61	8.43024	0.277	cg16014085	ZNF48	NM_152652	TSS1500	30406122	30406245	NC_000016.9
cg17564529	7.58e-06	3.46e-08	6.61	8.43007	0.233	cg17564529				75934484	75934607	NC_000007.13
cg20952286	7.63e-06	3.48e-08	6.61	8.4228	0.221	cg20952286	CCDC37	NM_182628	TSS200	126113695	126113818	NC_000003.11
cg24159514	7.63e-06	3.49e-08	6.61	8.42268	0.267	cg24159514	ZNF833	NR_028594	Body	11785248	11785371	NC_000019.9
cg08560952	7.64e-06	3.49e-08	6.61	8.42091	0.185	cg08560952				50278816	50278939	NC_000016.9
cg14204430	7.67e-06	3.51e-08	6.61	8.41536	0.291	cg14204430	NDST4	NM_022569	TSS200	116035217	116035340	NC_000004.11
cg16435923	7.68e-06	3.52e-08	6.61	8.41257	0.168	cg16435923	PCDHGA4;PCDHGA2;PCDHGA5;PCDHGB2;PCDHGA1;PCDHGB1;PCDHGA3;PCDHGA5	NM_018917;NM_018915;NM_032054;NM_018923;NM_018912;NM_018922;NM_018916;NM_018918	Body;Body;1stExon;Body;Body;Body;Body;1stExon	140744155	140744278	NC_000005.9
cg26055950	7.7e-06	3.53e-08	6.61	8.40943	0.228	cg26055950	TP73	NM_005427	Body	3600852	3600975	NC_000001.10
cg21836062	7.71e-06	3.54e-08	6.61	8.40756	0.26	cg21836062	DMD;DMD	NM_000109;NM_000109	1stExon;5'UTR	33357661	33357784	NC_000023.10
cg04605287	7.71e-06	3.54e-08	6.61	8.40609	0.247	cg04605287				54953486	54953609	NC_000001.10
cg01965047	7.71e-06	3.55e-08	6.61	8.40564	0.14	cg01965047	PKD1;MIR1225;PKD1	NM_001009944;NR_030646;NM_000296	Body;TSS1500;Body	2140870	2140993	NC_000016.9
cg19940077	7.73e-06	3.56e-08	6.6	8.40206	0.222	cg19940077	GPR25	NM_005298	1stExon	200842282	200842405	NC_000001.10
cg15232539	7.73e-06	3.56e-08	6.6	8.40121	0.374	cg15232539	CSGALNACT1;CSGALNACT1;CSGALNACT1;CSGALNACT1	NM_001130518;NM_001130518;NR_024040;NM_018371	1stExon;5'UTR;Body;5'UTR	19459672	19459795	NC_000008.10
cg03045635	7.76e-06	3.58e-08	6.6	8.39632	0.23	cg03045635	DRD5	NM_000798	TSS200	9783198	9783321	NC_000004.11
cg05690808	7.76e-06	3.58e-08	6.6	8.39608	0.163	cg05690808	NECAB2	NM_019065	Body	84027059	84027182	NC_000016.9
cg26942275	7.77e-06	3.59e-08	6.6	8.39341	0.211	cg26942275	COL1A2	NM_000089	TSS200	94023825	94023948	NC_000007.13
cg05036337	7.82e-06	3.61e-08	6.6	8.38673	0.175	cg05036337				5851912	5852035	NC_000006.11
cg24877842	7.86e-06	3.64e-08	6.6	8.37993	0.212	cg24877842	TRAK1;TRAK1	NM_014965;NM_001042646	1stExon;Body	42201898	42202021	NC_000003.11
cg22853427	7.88e-06	3.65e-08	6.6	8.37691	0.107	cg22853427	C8orf84	NM_153225	1stExon	74005275	74005398	NC_000008.10
cg10172584	7.88e-06	3.65e-08	6.6	8.37634	0.213	cg10172584	YJEFN3	NM_198537	TSS200	19639581	19639704	NC_000019.9
cg08864042	7.93e-06	3.69e-08	6.59	8.36719	0.128	cg08864042	DCTN1;DCTN1;DCTN1;DCTN1	NM_004082;NM_004082;NM_001135040;NM_001135040	5'UTR;1stExon;1stExon;5'UTR	74607470	74607593	NC_000002.11
cg21504624	7.94e-06	3.69e-08	6.59	8.36593	0.0985	cg21504624	IL11RA;IL11RA;IL11RA	NM_001142784;NM_147162;NM_004512	5'UTR;TSS1500;TSS1500	34653580	34653703	NC_000009.11
cg23476877	7.94e-06	3.7e-08	6.59	8.36494	0.199	cg23476877				176543964	176544087	NC_000005.9
cg02803819	7.95e-06	3.7e-08	6.59	8.36343	0.322	cg02803819	HOXA2	NM_006735	Body	27141067	27141190	NC_000007.13
cg23417203	7.95e-06	3.7e-08	6.59	8.36323	0.365	cg23417203	RGS14	NM_006480	Body	176790179	176790302	NC_000005.9
cg07750378	7.95e-06	3.7e-08	6.59	8.36305	0.198	cg07750378	ZPBP;ZPBP	NM_007009;NM_001159878	1stExon;1stExon	50132764	50132887	NC_000007.13
cg25452067	7.95e-06	3.71e-08	6.59	8.3617	0.182	cg25452067				101281603	101281726	NC_000010.10
cg15626350	8.02e-06	3.75e-08	6.59	8.3501	0.299	cg15626350	ESR1;ESR1;ESR1;ESR1	NM_001122740;NM_001122741;NM_000125;NM_001122742	Body;Body;Body;Body	152130207	152130330	NC_000006.11
cg18568589	8.03e-06	3.76e-08	6.59	8.3476	0.181	cg18568589	ZNF560	NM_152476	TSS200	9609395	9609518	NC_000019.9
cg17352045	8.03e-06	3.76e-08	6.59	8.34642	0.241	cg17352045	PPP1R2P1	NR_027771	Body	32847702	32847825	NC_000006.11
cg03065459	8.03e-06	3.77e-08	6.59	8.34524	0.196	cg03065459				3059773	3059896	NC_000016.9
cg16422907	8.04e-06	3.77e-08	6.59	8.3444	0.166	cg16422907	CCNA1;CCNA1;CCNA1;CCNA1;CCNA1;CCNA1	NM_003914;NM_001111047;NM_003914;NM_001111045;NM_001111046;NM_001111045	5'UTR;5'UTR;1stExon;1stExon;5'UTR;5'UTR	37006734	37006857	NC_000013.10
cg06501366	8.04e-06	3.78e-08	6.59	8.34255	0.236	cg06501366	BHMT2;DMGDH	NM_017614;NM_013391	Body;TSS1500	78365687	78365810	NC_000005.9
cg01964152	8.04e-06	3.78e-08	6.59	8.34218	0.23	cg01964152				30095546	30095669	NC_000006.11
cg24204951	8.07e-06	3.79e-08	6.59	8.33904	0.269	cg24204951	PER2	NM_022817	Body	239172084	239172207	NC_000002.11
cg17284236	8.11e-06	3.82e-08	6.58	8.3329	0.274	cg17284236	ZNF490	NM_020714	Body	12708001	12708124	NC_000019.9
cg00106345	8.2e-06	3.88e-08	6.58	8.31676	0.324	cg00106345				27138396	27138519	NC_000007.13
cg23178195	8.21e-06	3.88e-08	6.58	8.31565	0.215	cg23178195	FXYD1;FXYD1	NM_021902;NM_005031	TSS200;TSS1500	35629703	35629826	NC_000019.9
cg15694715	8.21e-06	3.89e-08	6.58	8.3151	0.298	cg15694715	TMEM25;TMEM25;TMEM25;TMEM25;TMEM25;TMEM25	NM_001144035;NM_001144038;NM_001144037;NM_032780;NM_001144034;NM_001144036	5'UTR;5'UTR;5'UTR;5'UTR;5'UTR;5'UTR	118402280	118402403	NC_000011.9
cg05774978	8.23e-06	3.9e-08	6.58	8.3105	0.294	cg05774978	PDIA3P	NR_002305	Body	146649842	146649965	NC_000001.10
cg04737124	8.25e-06	3.91e-08	6.58	8.30872	0.22	cg04737124	VTI1A	NM_145206	Body	114344988	114345111	NC_000010.10
cg21746001	8.28e-06	3.93e-08	6.58	8.30463	0.104	cg21746001	RARG;RARG	NM_001042728;NM_000966	Body;Body	53610772	53610895	NC_000012.11
cg09939549	8.28e-06	3.93e-08	6.58	8.30424	0.257	cg09939549	ASPSCR1	NM_024083	Body	79950061	79950184	NC_000017.10
cg13246235	8.28e-06	3.93e-08	6.58	8.3039	0.353	cg13246235	PHACTR1	NM_030948	Body	12749978	12750101	NC_000006.11
cg05261299	8.28e-06	3.93e-08	6.58	8.30303	0.159	cg05261299				52437299	52437422	NC_000012.11
cg19523819	8.28e-06	3.94e-08	6.58	8.30212	0.179	cg19523819	MTSS1	NM_014751	TSS1500	125741259	125741382	NC_000008.10
cg14601444	8.3e-06	3.95e-08	6.57	8.29885	0.223	cg14601444	DCTN1;DCTN1	NM_004082;NM_001135040	TSS200;TSS200	74607536	74607659	NC_000002.11
cg17333767	8.3e-06	3.95e-08	6.57	8.29872	0.263	cg17333767	CECR1;CECR1	NM_177405;NM_017424	TSS200;Body	17680561	17680684	NC_000022.10
cg10111115	8.3e-06	3.95e-08	6.57	8.29842	0.0871	cg10111115	PDZRN3	NM_015009	TSS200	73674146	73674269	NC_000003.11
cg05535398	8.3e-06	3.95e-08	6.57	8.29802	0.176	cg05535398				43034257	43034380	NC_000005.9
cg22157494	8.31e-06	3.96e-08	6.57	8.29597	0.159	cg22157494	KIAA0562;DFFB	NM_014704;NM_004402	TSS1500;Body	3774827	3774950	NC_000001.10
cg20370678	8.32e-06	3.97e-08	6.57	8.29438	0.283	cg20370678				58216297	58216420	NC_000017.10
cg02745847	8.32e-06	3.97e-08	6.57	8.29306	0.311	cg02745847	IGF2BP1;IGF2BP1	NM_006546;NM_001160423	Body;Body	47075880	47076003	NC_000017.10
cg04500896	8.32e-06	3.98e-08	6.57	8.29265	0.201	cg04500896	LOXL3	NM_032603	Body	74775717	74775840	NC_000002.11
cg12601909	8.32e-06	3.98e-08	6.57	8.29202	0.214	cg12601909	TOLLIP	NM_019009	Body	1324478	1324601	NC_000011.9
cg16529268	8.32e-06	3.98e-08	6.57	8.29135	0.242	cg16529268	CBLC;CBLC	NM_012116;NM_001130852	1stExon;1stExon	45281284	45281407	NC_000019.9
cg08845721	8.33e-06	3.99e-08	6.57	8.29024	0.302	cg08845721	NR3C1;NR3C1;NR3C1;NR3C1;NR3C1;NR3C1;NR3C1	NM_001018076;NM_001020825;NM_000176;NM_001018075;NM_001018077;NM_001024094;NM_001018074	5'UTR;5'UTR;5'UTR;5'UTR;5'UTR;5'UTR;5'UTR	142780693	142780816	NC_000005.9
cg16814483	8.35e-06	4e-08	6.57	8.28721	0.28	cg16814483				146550074	146550197	NC_000001.10
cg04539515	8.36e-06	4.01e-08	6.57	8.28516	0.279	cg04539515				221068794	221068917	NC_000001.10
cg13772815	8.36e-06	4.01e-08	6.57	8.28458	0.137	cg13772815				20492631	20492754	NC_000017.10
cg12674357	8.37e-06	4.01e-08	6.57	8.2834	0.271	cg12674357				106957945	106958068	NC_000006.11
cg17124583	8.44e-06	4.06e-08	6.57	8.27228	0.15	cg17124583	GATA3;GATA3	NM_001002295;NM_002051	Body;Body	8097641	8097764	NC_000010.10
cg26276572	8.44e-06	4.06e-08	6.57	8.27192	0.189	cg26276572	NCRNA00162	NR_024089	Body	46421023	46421146	NC_000021.8
cg25608041	8.46e-06	4.07e-08	6.57	8.26932	0.204	cg25608041	TBC1D1	NM_015173	TSS1500	37891834	37891957	NC_000004.11
cg21440365	8.46e-06	4.07e-08	6.57	8.26879	0.195	cg21440365				130995997	130996120	NC_000008.10
cg16602460	8.46e-06	4.07e-08	6.57	8.26843	0.142	cg16602460	PBX2	NM_002586	Body	32156071	32156194	NC_000006.11
cg09233204	8.5e-06	4.1e-08	6.56	8.26273	0.0767	cg09233204	CYP26C1	NM_183374	TSS1500	94819559	94819682	NC_000010.10
cg19964641	8.51e-06	4.11e-08	6.56	8.26048	0.171	cg19964641	SEC14L4;SEC14L4	NM_174977;NM_001161368	TSS200;TSS200	30901780	30901903	NC_000022.10
cg12964741	8.53e-06	4.12e-08	6.56	8.25801	0.0835	cg12964741	NFATC1;NFATC1;NFATC1;NFATC1;NFATC1	NM_006162;NM_172387;NM_172388;NM_172389;NM_172390	Body;TSS200;5'UTR;TSS200;Body	77160221	77160344	NC_000018.9
cg12508451	8.54e-06	4.12e-08	6.56	8.25692	0.21	cg12508451	LOC145845	NR_024264	Body	37172793	37172916	NC_000015.9
cg04913979	8.6e-06	4.16e-08	6.56	8.24701	0.306	cg04913979	SHOX2;SHOX2;SHOX2	NM_001163678;NM_006884;NM_003030	Body;Body;Body	157821994	157822117	NC_000003.11
cg18016194	8.6e-06	4.16e-08	6.56	8.24666	0.232	cg18016194	RALYL;RALYL;RALYL;RALYL;RALYL	NM_001100391;NM_173848;NM_001100391;NM_001100392;NM_001100393	5'UTR;5'UTR;1stExon;5'UTR;5'UTR	85097157	85097280	NC_000008.10
cg03466066	8.6e-06	4.17e-08	6.56	8.2465	0.1	cg03466066				88154389	88154512	NC_000016.9
cg18299634	8.63e-06	4.19e-08	6.56	8.24121	0.119	cg18299634				9500174	9500297	NC_000004.11
cg08638320	8.64e-06	4.2e-08	6.56	8.23793	0.284	cg08638320	FOXD2;MGC12982	NM_004474;NR_026878	TSS1500;Body	47900265	47900388	NC_000001.10
cg27033805	8.64e-06	4.2e-08	6.56	8.23744	0.266	cg27033805	BOP1	NM_015201	Body	145499436	145499559	NC_000008.10
cg05787556	8.7e-06	4.23e-08	6.55	8.23026	0.222	cg05787556	TLX3	NM_021025	TSS1500	170735186	170735309	NC_000005.9
cg08611810	8.72e-06	4.25e-08	6.55	8.22688	0.176	cg08611810	LOC100302652;GPR75	NM_001164165;NM_006794	TSS200;TSS200	54087178	54087301	NC_000002.11
cg23792934	8.72e-06	4.25e-08	6.55	8.22667	0.178	cg23792934				70403785	70403908	NC_000017.10
cg16400756	8.72e-06	4.25e-08	6.55	8.22635	0.151	cg16400756	KCNAB2;KCNAB2	NM_003636;NM_172130	Body;Body	6105939	6106062	NC_000001.10
cg18946602	8.72e-06	4.25e-08	6.55	8.22594	0.364	cg18946602	NFIA;NFIA;NFIA;NFIA	NM_001145512;NM_001145511;NM_001134673;NM_005595	Body;Body;Body;Body	61549982	61550105	NC_000001.10
cg00924265	8.73e-06	4.26e-08	6.55	8.2232	0.255	cg00924265				28258117	28258240	NC_000008.10
cg14462779	8.73e-06	4.27e-08	6.55	8.22297	0.145	cg14462779	DUPD1	NM_001003892	Body	76803669	76803792	NC_000010.10
cg14669379	8.73e-06	4.27e-08	6.55	8.22191	0.252	cg14669379	ADORA3	NM_001081976	Body	112058559	112058682	NC_000001.10
cg00921973	8.73e-06	4.27e-08	6.55	8.22169	0.257	cg00921973	DPM2	NM_003863	TSS1500	130701076	130701199	NC_000009.11
cg06848073	8.73e-06	4.27e-08	6.55	8.22159	0.16	cg06848073	FBXO44;FBXO2;FBXO44;FBXO44;FBXO44	NM_183413;NM_012168;NM_183412;NM_033182;NM_001014765	TSS1500;Body;TSS1500;TSS1500;TSS1500	11713540	11713663	NC_000001.10
cg05335944	8.74e-06	4.28e-08	6.55	8.21977	0.27	cg05335944	FRMD4A	NM_018027	Body	13749010	13749133	NC_000010.10
cg26132737	8.76e-06	4.29e-08	6.55	8.21768	0.188	cg26132737	ANKRD44	NM_153697	Body	198029141	198029264	NC_000002.11
cg12550055	8.79e-06	4.31e-08	6.55	8.21342	0.189	cg12550055	C22orf45;C22orf45;UPB1	NR_028484;NR_028483;NM_016327	TSS200;TSS200;TSS1500	24890833	24890956	NC_000022.10
cg17465304	8.8e-06	4.31e-08	6.55	8.21257	0.211	cg17465304	KIF12	NM_138424	TSS200	116861442	116861565	NC_000009.11
cg12504247	8.82e-06	4.32e-08	6.55	8.20997	0.16	cg12504247	GUCY2D	NM_000180	Body	7907007	7907130	NC_000017.10
cg08160331	8.82e-06	4.33e-08	6.55	8.20932	0.186	cg08160331	KLHL35	NM_001039548	1stExon	75140865	75140988	NC_000011.9
cg10242032	8.82e-06	4.33e-08	6.55	8.20917	0.125	cg10242032	LOC388692	NR_027002	Body	149287303	149287426	NC_000001.10
cg18081258	8.82e-06	4.33e-08	6.55	8.20849	0.21	cg18081258	NDRG2;NDRG2;NDRG2;NDRG2;NDRG2;NDRG2;NDRG2;NDRG2	NM_201539;NM_201535;NM_201538;NM_201541;NM_201540;NM_201536;NM_016250;NM_201537	TSS1500;TSS1500;TSS1500;TSS1500;TSS1500;TSS1500;TSS1500;TSS1500	21494161	21494284	NC_000014.8
cg01539849	8.82e-06	4.33e-08	6.55	8.2076	0.219	cg01539849	SPI1;SPI1	NM_001080547;NM_003120	3'UTR;3'UTR	47376754	47376877	NC_000011.9
cg24187797	8.82e-06	4.33e-08	6.55	8.2074	0.114	cg24187797	RMND5B	NM_022762	Body	177571022	177571145	NC_000005.9
cg25616777	8.84e-06	4.35e-08	6.55	8.20462	0.184	cg25616777				27645056	27645179	NC_000001.10
cg02381279	8.86e-06	4.36e-08	6.55	8.20122	0.31	cg02381279				16394366	16394489	NC_000019.9
cg06951677	8.86e-06	4.37e-08	6.55	8.19984	0.251	cg06951677				221061837	221061960	NC_000001.10
cg26457809	8.86e-06	4.37e-08	6.55	8.19973	0.211	cg26457809	KCNQ1DN	NR_024627	TSS1500	2890617	2890740	NC_000011.9
cg12785342	8.87e-06	4.37e-08	6.55	8.19854	0.232	cg12785342	ARL4A;ARL4A;ARL4A	NM_001037164;NM_212460;NM_005738	3'UTR;3'UTR;3'UTR	12728890	12729013	NC_000007.13
cg19738924	8.87e-06	4.38e-08	6.55	8.19795	0.247	cg19738924	KCTD1;KCTD1;KCTD1	NM_001136205;NM_001142730;NM_198991	5'UTR;Body;5'UTR	24126072	24126195	NC_000018.9
cg17807479	8.87e-06	4.38e-08	6.54	8.19731	0.216	cg17807479	SHISA6	NM_207386	1stExon	11145042	11145165	NC_000017.10
cg25153759	8.88e-06	4.38e-08	6.54	8.19663	0.0822	cg25153759	VENTX	NM_014468	TSS1500	135051022	135051145	NC_000010.10
cg01026009	8.88e-06	4.38e-08	6.54	8.19598	0.273	cg01026009	CNPY1	NM_001103176	3'UTR	155294404	155294527	NC_000007.13
cg19411084	8.9e-06	4.4e-08	6.54	8.19233	0.128	cg19411084	PDSS2	NM_020381	Body	107731096	107731219	NC_000006.11
cg04682135	8.91e-06	4.4e-08	6.54	8.19147	0.16	cg04682135	C3orf55;C3orf55;C3orf55;C3orf55	NM_001130001;NM_001099777;NM_001130002;NR_024016	TSS1500;TSS1500;TSS1500;TSS1500	157260764	157260887	NC_000003.11
cg25101657	8.94e-06	4.43e-08	6.54	8.18588	0.279	cg25101657				32751628	32751751	NC_000017.10
cg23935420	8.94e-06	4.43e-08	6.54	8.18516	0.152	cg23935420	TIGD3	NM_145719	Body	65123609	65123732	NC_000011.9
cg10420161	8.94e-06	4.44e-08	6.54	8.1842	0.266	cg10420161				102899983	102900106	NC_000010.10
cg22086834	8.94e-06	4.44e-08	6.54	8.1838	0.278	cg22086834	SGCE;SGCE;SGCE	NM_001099400;NM_001099401;NM_003919	Body;Body;Body	94278830	94278953	NC_000007.13
cg13210467	8.95e-06	4.44e-08	6.54	8.18329	0.145	cg13210467	STAG3;GPC2	NM_012447;NM_152742	TSS200;TSS1500	99775443	99775566	NC_000007.13
cg04723449	8.96e-06	4.45e-08	6.54	8.18112	0.182	cg04723449	COG7	NM_153603	Body	23420567	23420690	NC_000016.9
cg10672681	8.97e-06	4.46e-08	6.54	8.1796	0.273	cg10672681	ABHD10	NM_018394	TSS1500	111697537	111697660	NC_000003.11
cg05265359	8.97e-06	4.46e-08	6.54	8.17913	0.136	cg05265359	GYLTL1B	NM_152312	5'UTR	45943572	45943695	NC_000011.9
cg26328180	8.97e-06	4.46e-08	6.54	8.1779	0.187	cg26328180				91874214	91874337	NC_000002.11
cg12646649	8.98e-06	4.47e-08	6.54	8.17624	0.336	cg12646649	LBX1	NM_006562	Body	102987257	102987380	NC_000010.10
cg20831708	9.01e-06	4.49e-08	6.54	8.17233	0.234	cg20831708	SEC31B	NM_015490	5'UTR	102279373	102279496	NC_000010.10
cg04399988	9.01e-06	4.49e-08	6.54	8.17185	0.186	cg04399988				24018055	24018178	NC_000014.8
cg04760348	9.02e-06	4.5e-08	6.54	8.17041	0.209	cg04760348				86608910	86609033	NC_000016.9
cg08195247	9.02e-06	4.5e-08	6.54	8.16912	0.296	cg08195247				176933286	176933409	NC_000002.11
cg03171770	9.02e-06	4.51e-08	6.54	8.16902	0.272	cg03171770				43393728	43393851	NC_000010.10
cg23063716	9.03e-06	4.52e-08	6.54	8.1668	0.0478	cg23063716	SIN3A;SIN3A;SIN3A;SIN3A	NM_015477;NM_001145358;NM_001145357;NM_001145358	TSS200;5'UTR;5'UTR;1stExon	75743999	75744122	NC_000015.9
cg04957377	9.04e-06	4.53e-08	6.54	8.16459	0.28	cg04957377				21507259	21507382	NC_000014.8
cg20499290	9.04e-06	4.53e-08	6.54	8.16448	0.161	cg20499290				38015579	38015702	NC_000010.10
cg22420044	9.04e-06	4.53e-08	6.54	8.16388	0.153	cg22420044	MCM7;MCM7;MIR25	NM_005916;NM_182776;NR_029498	Body;Body;TSS200	99691385	99691508	NC_000007.13
cg04646674	9.06e-06	4.54e-08	6.53	8.16112	0.23	cg04646674	NFIX	NM_002501	Body	13113482	13113605	NC_000019.9
cg18182399	9.08e-06	4.56e-08	6.53	8.15805	0.278	cg18182399	DES;DES	NM_001927;NM_001927	1stExon;5'UTR	220283175	220283298	NC_000002.11
cg24709745	9.09e-06	4.57e-08	6.53	8.15575	0.0638	cg24709745	C1orf159	NM_017891	5'UTR	1049864	1049987	NC_000001.10
cg15605124	9.09e-06	4.57e-08	6.53	8.15451	0.212	cg15605124	PRDM16;PRDM16	NM_022114;NM_199454	Body;Body	3230250	3230373	NC_000001.10
cg09991306	9.1e-06	4.58e-08	6.53	8.15206	0.265	cg09991306	SNED1	NM_001080437	Body	241975140	241975263	NC_000002.11
cg13740929	9.12e-06	4.59e-08	6.53	8.15004	0.157	cg13740929				31651291	31651414	NC_000006.11
cg01381846	9.12e-06	4.6e-08	6.53	8.14921	0.338	cg01381846	HOXA9	NM_152739	1stExon	27204785	27204908	NC_000007.13
cg22685502	9.14e-06	4.61e-08	6.53	8.14695	0.155	cg22685502	RYBP	NM_012234	TSS1500	72496851	72496974	NC_000003.11
cg07416237	9.15e-06	4.61e-08	6.53	8.14529	0.219	cg07416237	CLYBL	NM_206808	3'UTR	100548078	100548201	NC_000013.10
cg22825202	9.16e-06	4.62e-08	6.53	8.14327	0.149	cg22825202	POMT2	NM_013382	Body	77767650	77767773	NC_000014.8
cg03980370	9.17e-06	4.63e-08	6.53	8.14147	0.21	cg03980370				139117543	139117666	NC_000006.11
cg01354473	9.19e-06	4.65e-08	6.53	8.13795	0.212	cg01354473	HOXA9	NM_152739	1stExon	27204803	27204926	NC_000007.13
cg07327299	9.2e-06	4.65e-08	6.53	8.13685	0.248	cg07327299	GRB7;GRB7	NM_005310;NM_001030002	5'UTR;5'UTR	37896063	37896186	NC_000017.10
cg05258294	9.22e-06	4.67e-08	6.53	8.1342	0.166	cg05258294	ZNF598	NM_178167	Body	2049878	2050001	NC_000016.9
cg11985839	9.22e-06	4.68e-08	6.53	8.13232	0.14	cg11985839	DDR1;DDR1	NM_013993;NM_001954	5'UTR;5'UTR	30853007	30853130	NC_000006.11
cg21817858	9.22e-06	4.68e-08	6.53	8.13169	0.176	cg21817858				141133337	141133460	NC_000005.9
cg05215272	9.22e-06	4.68e-08	6.53	8.13121	0.154	cg05215272	ALOX12	NM_000697	TSS1500	6899095	6899218	NC_000017.10
cg25922969	9.22e-06	4.68e-08	6.53	8.1308	0.235	cg25922969	RGS14	NM_006480	Body	176793941	176794064	NC_000005.9
cg04339553	9.24e-06	4.7e-08	6.52	8.12726	0.268	cg04339553	MEIS2;MEIS2;MEIS2;MEIS2;MEIS2;MEIS2;MEIS2	NM_172316;NM_170674;NM_170675;NM_172315;NM_002399;NM_170677;NM_170676	Body;Body;Body;Body;Body;Body;Body	37307513	37307636	NC_000015.9
cg20129806	9.24e-06	4.7e-08	6.52	8.12647	0.194	cg20129806	UNC93B1	NM_030930	3'UTR	67758754	67758877	NC_000011.9
cg03455250	9.24e-06	4.7e-08	6.52	8.12623	0.148	cg03455250				35442238	35442361	NC_000001.10
cg09346118	9.25e-06	4.71e-08	6.52	8.12444	0.238	cg09346118	C1orf61;MIR9-1	NM_006365;NR_029691	5'UTR;TSS1500	156390523	156390646	NC_000001.10
cg05206183	9.26e-06	4.72e-08	6.52	8.12287	0.106	cg05206183	RAC3	NM_005052	Body	79991323	79991446	NC_000017.10
cg27309611	9.26e-06	4.72e-08	6.52	8.12246	0.152	cg27309611	SEPT8;SEPT8;SEPT8;SEPT8	NM_001098813;NM_015146;NM_001098812;NM_001098811	TSS200;TSS1500;TSS1500;TSS1500	132113725	132113848	NC_000005.9
cg27348266	9.26e-06	4.73e-08	6.52	8.12135	0.116	cg27348266				104583972	104584095	NC_000014.8
cg13134448	9.28e-06	4.74e-08	6.52	8.11954	0.037	cg13134448	THRAP3	NM_005119	TSS1500	36689477	36689600	NC_000001.10
cg12103951	9.29e-06	4.75e-08	6.52	8.1167	0.265	cg12103951				88162314	88162437	NC_000010.10
cg02849695	9.31e-06	4.77e-08	6.52	8.11353	0.292	cg02849695	CCDC19	NM_012337	TSS200	159869960	159870083	NC_000001.10
cg01573089	9.33e-06	4.78e-08	6.52	8.11071	0.157	cg01573089	DIP2C;C10orf108;C10orf108	NM_014974;NR_027151;NR_027152	Body;Body;Body	696063	696186	NC_000010.10
cg16590319	9.34e-06	4.79e-08	6.52	8.10939	0.189	cg16590319	CELSR2	NM_001408	Body	109805584	109805707	NC_000001.10
cg11685316	9.36e-06	4.8e-08	6.52	8.10649	0.205	cg11685316	MFSD6L;MFSD6L	NM_152599;NM_152599	5'UTR;1stExon	8702564	8702687	NC_000017.10
cg26589785	9.36e-06	4.8e-08	6.52	8.10629	0.154	cg26589785	ITPKA	NM_002220	Body	41795304	41795427	NC_000015.9
cg22834147	9.4e-06	4.83e-08	6.52	8.10042	0.341	cg22834147	RSRC1	NM_016625	Body	158189615	158189738	NC_000003.11
cg12918604	9.41e-06	4.84e-08	6.52	8.09851	0.209	cg12918604	ANKAR	NM_144708	Body	190541400	190541523	NC_000002.11
cg06707978	9.42e-06	4.84e-08	6.52	8.09776	0.104	cg06707978	ZIK1	NM_001010879	TSS1500	58095155	58095278	NC_000019.9
cg26516532	9.42e-06	4.85e-08	6.52	8.09671	0.186	cg26516532				17475832	17475955	NC_000001.10
cg21306988	9.48e-06	4.88e-08	6.51	8.08987	0.257	cg21306988	LIG4;LIG4;LIG4	NM_206937;NM_002312;NM_001098268	5'UTR;TSS200;5'UTR	108867134	108867257	NC_000013.10
cg06129556	9.49e-06	4.89e-08	6.51	8.08805	0.182	cg06129556	CSNK1G1	NM_022048	5'UTR	64634880	64635003	NC_000015.9
cg17133446	9.51e-06	4.91e-08	6.51	8.08466	0.125	cg17133446	TPST2;TPST2	NM_003595;NM_001008566	5'UTR;TSS200	26961427	26961550	NC_000022.10
cg02077068	9.53e-06	4.92e-08	6.51	8.08221	0.225	cg02077068	GPRC5B	NM_016235	Body	19872240	19872363	NC_000016.9
cg27663279	9.57e-06	4.94e-08	6.51	8.0773	0.111	cg27663279	CYP2W1	NM_017781	Body	1024224	1024347	NC_000007.13
cg08650629	9.58e-06	4.95e-08	6.51	8.0759	0.152	cg08650629	FAM109B	NM_001002034	TSS200	42470106	42470229	NC_000022.10
cg07203423	9.61e-06	4.97e-08	6.51	8.07171	0.305	cg07203423	TLX2	NM_016170	Body	74743009	74743132	NC_000002.11
cg11622330	9.61e-06	4.97e-08	6.51	8.07164	0.162	cg11622330	REXO1	NM_020695	Body	1843747	1843870	NC_000019.9
cg26132320	9.62e-06	4.98e-08	6.51	8.06939	0.25	cg26132320	MMP9	NM_004994	Body	44640353	44640476	NC_000020.10
cg11234339	9.63e-06	4.99e-08	6.51	8.06815	0.281	cg11234339				10907448	10907571	NC_000011.9
cg08957564	9.63e-06	4.99e-08	6.51	8.06751	0.233	cg08957564	RUNDC2A	NM_032167	Body	12071814	12071937	NC_000016.9
cg01356044	9.65e-06	5.01e-08	6.51	8.06395	0.174	cg01356044	MTSS1L	NM_138383	TSS1500	70720817	70720940	NC_000016.9
cg10502957	9.65e-06	5.02e-08	6.51	8.06273	0.298	cg10502957	CDK2AP1	NM_004642	TSS1500	123757070	123757193	NC_000012.11
cg05820859	9.66e-06	5.03e-08	6.51	8.06104	0.185	cg05820859	CARD14;CARD14	NM_052819;NM_024110	Body;Body	78165292	78165415	NC_000017.10
cg14093103	9.66e-06	5.03e-08	6.5	8.0608	0.282	cg14093103	NFIA;NFIA	NM_001145511;NM_001145512	Body;TSS1500	61546214	61546337	NC_000001.10
cg07595776	9.66e-06	5.03e-08	6.5	8.06018	0.225	cg07595776				77253990	77254113	NC_000005.9
cg04453050	9.71e-06	5.06e-08	6.5	8.05491	0.172	cg04453050	GRM2;GRM2	NM_000839;NM_001130063	TSS200;TSS200	51740896	51741019	NC_000003.11
cg13353679	9.73e-06	5.07e-08	6.5	8.05235	0.239	cg13353679	AFF3;AFF3	NM_001025108;NM_002285	Body;Body	100720179	100720302	NC_000002.11
cg13560901	9.77e-06	5.1e-08	6.5	8.04689	0.178	cg13560901	TRIL	NM_014817	TSS1500	28998540	28998663	NC_000007.13
cg18449120	9.78e-06	5.11e-08	6.5	8.04509	0.219	cg18449120	SOX11	NM_003108	1stExon	5832882	5833005	NC_000002.11
cg09730302	9.8e-06	5.12e-08	6.5	8.04212	0.201	cg09730302	DOCK1	NM_001380	Body	128595047	128595170	NC_000010.10
cg14015502	9.81e-06	5.13e-08	6.5	8.04058	0.258	cg14015502	C10orf26;C10orf26	NM_017787;NM_001083913	TSS1500;Body	104535020	104535143	NC_000010.10
cg01937803	9.81e-06	5.13e-08	6.5	8.04003	0.143	cg01937803				103605307	103605430	NC_000014.8
cg23859635	9.82e-06	5.14e-08	6.5	8.03929	0.208	cg23859635	MTA3	NM_020744	TSS1500	42795262	42795385	NC_000002.11
cg25518276	9.82e-06	5.14e-08	6.5	8.03869	0.275	cg25518276	C11orf85	NM_001037225	TSS1500	64728559	64728682	NC_000011.9
cg09689404	9.84e-06	5.15e-08	6.5	8.03641	0.219	cg09689404				3724497	3724620	NC_000010.10
cg13962321	9.84e-06	5.17e-08	6.5	8.03383	0.149	cg13962321	HIST2H2BF	NM_001024599	1stExon	149399174	149399297	NC_000001.10
cg11104088	9.86e-06	5.18e-08	6.5	8.03113	0.325	cg11104088	TAF3	NM_031923	TSS1500	7859676	7859799	NC_000010.10
cg18395636	9.88e-06	5.19e-08	6.5	8.02879	0.14	cg18395636	RAB38	NM_022337	TSS200	87908785	87908908	NC_000011.9
cg01185080	9.89e-06	5.2e-08	6.5	8.02753	0.217	cg01185080	ZNF710	NM_198526	TSS1500	90543813	90543936	NC_000015.9
cg15903032	9.91e-06	5.22e-08	6.49	8.02405	0.156	cg15903032				101297605	101297728	NC_000010.10
cg23668184	9.95e-06	5.24e-08	6.49	8.0196	0.201	cg23668184	SOX11;SOX11	NM_003108;NM_003108	3'UTR;1stExon	5836713	5836836	NC_000002.11
cg02501779	9.96e-06	5.25e-08	6.49	8.01762	0.125	cg02501779	CBLN4;CBLN4	NM_080617;NM_080617	5'UTR;1stExon	54579355	54579478	NC_000020.10
cg22374940	9.99e-06	5.27e-08	6.49	8.01432	0.214	cg22374940				26551782	26551905	NC_000001.10
cg01613725	9.99e-06	5.27e-08	6.49	8.01342	0.128	cg01613725				155198679	155198802	NC_000006.11
cg02898721	1e-05	5.31e-08	6.49	8.00717	0.227	cg02898721	RARA;RARA;RARA	NM_001145302;NM_000964;NM_001145301	TSS1500;5'UTR;TSS1500	38473222	38473345	NC_000017.10
cg16113254	1e-05	5.31e-08	6.49	8.00582	0.239	cg16113254				75777372	75777495	NC_000014.8
cg19256813	1.01e-05	5.32e-08	6.49	8.00385	0.284	cg19256813	FBXO21;FBXO21	NM_015002;NM_033624	Body;Body	117627286	117627409	NC_000012.11
cg06938264	1.01e-05	5.34e-08	6.49	8.00051	0.248	cg06938264	PCDHA6;PCDHA2;PCDHA1;PCDHA7;PCDHA1;PCDHA6;PCDHA5;PCDHA3;PCDHA4;PCDHA7	NM_031849;NM_018905;NM_031411;NM_031852;NM_018900;NM_018909;NM_018908;NM_018906;NM_018907;NM_018910	Body;Body;Body;1stExon;Body;Body;Body;Body;Body;1stExon	140214372	140214495	NC_000005.9
cg12528056	1.01e-05	5.34e-08	6.49	8.00047	0.131	cg12528056	GPR44	NM_004778	3'UTR	60619955	60620078	NC_000011.9
cg01743901	1.01e-05	5.35e-08	6.49	7.99868	0.063	cg01743901	RTBDN;RTBDN	NM_001080997;NM_031429	Body;Body	12936741	12936864	NC_000019.9
cg00459623	1.01e-05	5.35e-08	6.49	7.99849	0.367	cg00459623				176936581	176936704	NC_000002.11
cg00031187	1.01e-05	5.36e-08	6.49	7.99642	0.218	cg00031187				31522997	31523120	NC_000012.11
cg04142323	1.01e-05	5.37e-08	6.49	7.99514	0.231	cg04142323	LOC645323	NR_015436	TSS1500	87981449	87981572	NC_000005.9
cg21032074	1.01e-05	5.37e-08	6.49	7.99468	0.218	cg21032074	C6orf94	NM_001013623	TSS1500	144184944	144185067	NC_000006.11
cg13443627	1.02e-05	5.41e-08	6.48	7.98866	0.233	cg13443627	TACSTD2;TACSTD2	NM_002353;NM_002353	5'UTR;1stExon	59043070	59043193	NC_000001.10
cg27235218	1.02e-05	5.41e-08	6.48	7.98842	0.0979	cg27235218	CTBP1;CTBP1	NM_001328;NM_001012614	Body;Body	1208675	1208798	NC_000004.11
cg15926420	1.02e-05	5.41e-08	6.48	7.98757	0.192	cg15926420	CASQ1	NM_001231	TSS1500	160159672	160159795	NC_000001.10
cg00838423	1.02e-05	5.42e-08	6.48	7.98722	0.219	cg00838423				146552329	146552452	NC_000001.10
cg10823473	1.02e-05	5.42e-08	6.48	7.98639	0.226	cg10823473	ISL2	NM_145805	Body	76630514	76630637	NC_000015.9
cg15450098	1.02e-05	5.42e-08	6.48	7.98588	0.222	cg15450098	HLX	NM_021958	Body	221057561	221057684	NC_000001.10
cg04096519	1.02e-05	5.44e-08	6.48	7.98323	0.198	cg04096519	GPR44	NM_004778	Body	60620343	60620466	NC_000011.9
cg22127570	1.02e-05	5.44e-08	6.48	7.98297	0.0784	cg22127570				174443366	174443489	NC_000004.11
cg07566790	1.02e-05	5.44e-08	6.48	7.98205	0.106	cg07566790	LRRC48;LRRC48;LRRC48;LRRC48	NM_001130090;NM_001130091;NM_001130092;NM_031294	Body;Body;Body;Body	17910425	17910548	NC_000017.10
cg00173659	1.02e-05	5.46e-08	6.48	7.97982	0.273	cg00173659				156871088	156871211	NC_000007.13
cg27427581	1.02e-05	5.46e-08	6.48	7.97977	0.216	cg27427581				8075716	8075839	NC_000010.10
cg18077971	1.03e-05	5.48e-08	6.48	7.97473	0.319	cg18077971	PAX3;PAX3;PAX3;PAX3;PAX3;CCDC140;PAX3;PAX3;PAX3	NM_013942;NM_000438;NM_181460;NM_181457;NM_181458;NM_153038;NM_181461;NM_001127366;NM_181459	TSS1500;TSS1500;TSS1500;TSS1500;TSS1500;5'UTR;TSS1500;TSS1500;TSS1500	223164867	223164990	NC_000002.11
cg24884703	1.03e-05	5.49e-08	6.48	7.9728	0.313	cg24884703				91185422	91185545	NC_000001.10
cg19406036	1.03e-05	5.51e-08	6.48	7.96926	0.191	cg19406036				66914425	66914548	NC_000015.9
cg27361227	1.03e-05	5.52e-08	6.48	7.96891	0.267	cg27361227	ARSB;ARSB	NM_000046;NM_198709	Body;Body	78126647	78126770	NC_000005.9
cg07385220	1.03e-05	5.52e-08	6.48	7.9683	0.147	cg07385220	DOT1L	NM_032482	Body	2213933	2214056	NC_000019.9
cg07355189	1.03e-05	5.52e-08	6.48	7.96811	0.309	cg07355189	ALOX5	NM_000698	Body	45923374	45923497	NC_000010.10
cg24807547	1.03e-05	5.52e-08	6.48	7.96745	0.18	cg24807547				37504484	37504607	NC_000006.11
cg01171786	1.03e-05	5.54e-08	6.48	7.96532	0.188	cg01171786	DYSF;DYSF;DYSF;DYSF;DYSF;DYSF;DYSF;DYSF;DYSF;DYSF;DYSF;DYSF;DYSF;DYSF	NM_001130455;NM_001130979;NM_001130980;NM_001130982;NM_001130976;NM_001130987;NM_001130986;NM_001130981;NM_001130984;NM_001130983;NM_001130978;NM_001130985;NM_003494;NM_001130977	Body;Body;Body;Body;Body;Body;Body;Body;Body;Body;Body;Body;Body;Body	71787663	71787786	NC_000002.11
cg25706257	1.03e-05	5.54e-08	6.48	7.9649	0.322	cg25706257	ACOT7;ACOT7;ACOT7;ACOT7	NM_181864;NM_181865;NM_007274;NM_181866	Body;Body;Body;Body	6390530	6390653	NC_000001.10
cg24202131	1.03e-05	5.54e-08	6.48	7.96486	0.267	cg24202131	BRUNOL4;BRUNOL4;BRUNOL4;BRUNOL4	NM_001025088;NM_020180;NM_001025089;NM_001025087	Body;Body;Body;Body	34855482	34855605	NC_000018.9
cg02958126	1.03e-05	5.54e-08	6.48	7.96471	0.102	cg02958126	EML3;MTA2	NM_153265;NM_004739	Body;TSS1500	62370246	62370369	NC_000011.9
cg27185793	1.03e-05	5.54e-08	6.48	7.96411	0.139	cg27185793	ACAP3	NM_030649	Body	1238797	1238920	NC_000001.10
cg09102997	1.03e-05	5.55e-08	6.48	7.96346	0.19	cg09102997	NAT1;NAT1;NAT1;NAT1;NAT1;NAT1;NAT1;NAT1;NAT1	NM_001160171;NM_001160173;NM_001160176;NM_001160172;NM_000662;NM_001160170;NM_001160174;NM_001160175;NM_001160179	5'UTR;5'UTR;Body;5'UTR;5'UTR;5'UTR;TSS1500;Body;5'UTR	18078756	18078879	NC_000008.10
cg14380517	1.03e-05	5.57e-08	6.48	7.96017	0.0942	cg14380517	BTG3;BTG3	NM_001130914;NM_006806	TSS1500;TSS1500	18985761	18985884	NC_000021.8
cg23475625	1.04e-05	5.6e-08	6.47	7.95325	0.258	cg23475625				155259680	155259803	NC_000007.13
cg12353589	1.04e-05	5.61e-08	6.47	7.95235	0.101	cg12353589	TOLLIP	NM_019009	Body	1309892	1310015	NC_000011.9
cg02783887	1.04e-05	5.62e-08	6.47	7.95047	0.286	cg02783887				660856	660979	NC_000002.11
cg17555825	1.04e-05	5.62e-08	6.47	7.95012	0.292	cg17555825				76924190	76924313	NC_000005.9
cg02930200	1.04e-05	5.63e-08	6.47	7.94807	0.0847	cg02930200	DNALI1	NM_003462	TSS200	38022384	38022507	NC_000001.10
cg07565956	1.04e-05	5.63e-08	6.47	7.94799	0.137	cg07565956	ZBTB4;ZBTB4	NM_001128833;NM_020899	5'UTR;5'UTR	7381288	7381411	NC_000017.10
cg16929199	1.04e-05	5.65e-08	6.47	7.94606	0.252	cg16929199				155243417	155243540	NC_000007.13
cg13586599	1.04e-05	5.65e-08	6.47	7.94515	0.174	cg13586599	SCGN	NM_006998	TSS200	25652383	25652506	NC_000006.11
cg14276515	1.04e-05	5.65e-08	6.47	7.94513	0.142	cg14276515				325364	325487	NC_000011.9
cg17179314	1.05e-05	5.67e-08	6.47	7.94196	0.203	cg17179314	CHRNB4	NM_000750	TSS1500	78933820	78933943	NC_000015.9
cg10975889	1.05e-05	5.67e-08	6.47	7.94104	0.203	cg10975889	HLX	NM_021958	Body	221057808	221057931	NC_000001.10
cg13401014	1.05e-05	5.68e-08	6.47	7.93988	0.268	cg13401014				128559244	128559367	NC_000011.9
cg23368787	1.05e-05	5.69e-08	6.47	7.93802	0.168	cg23368787	ATP4A	NM_000704	Body	36049342	36049465	NC_000019.9
cg02825171	1.05e-05	5.7e-08	6.47	7.93713	0.143	cg02825171	DACT2	NM_214462	1stExon	168720183	168720306	NC_000006.11
cg05967403	1.05e-05	5.72e-08	6.47	7.93384	0.108	cg05967403	GSX1	NM_145657	Body	28367245	28367368	NC_000013.10
cg02475695	1.05e-05	5.72e-08	6.47	7.93375	0.173	cg02475695	NHLRC4	NM_176677	TSS1500	616220	616343	NC_000016.9
cg20248866	1.05e-05	5.72e-08	6.47	7.93305	0.133	cg20248866	PCYT2	NM_002861	TSS1500	79869748	79869871	NC_000017.10
cg09149118	1.05e-05	5.72e-08	6.47	7.93247	0.282	cg09149118	ITGAV;ITGAV;ITGAV	NM_001144999;NM_001145000;NM_002210	TSS1500;Body;Body	187463618	187463741	NC_000002.11
cg03130816	1.05e-05	5.73e-08	6.47	7.93179	0.208	cg03130816	AKIRIN1;AKIRIN1	NM_024595;NM_001136275	TSS1500;TSS1500	39456103	39456226	NC_000001.10
cg17241310	1.05e-05	5.74e-08	6.47	7.92901	0.213	cg17241310	BARHL2	NM_020063	TSS200	91182856	91182979	NC_000001.10
cg06492372	1.06e-05	5.78e-08	6.46	7.92247	0.274	cg06492372	FAM178B	NM_001122646	Body	97573176	97573299	NC_000002.11
cg14037769	1.06e-05	5.79e-08	6.46	7.92171	0.168	cg14037769				9895799	9895922	NC_000001.10
cg01561869	1.06e-05	5.8e-08	6.46	7.91996	0.228	cg01561869	PCDHGA2;PCDHGA3;PCDHGA3;PCDHGA1	NM_018915;NM_018916;NM_032011;NM_018912	Body;1stExon;1stExon;Body	140725147	140725270	NC_000005.9
cg13520736	1.06e-05	5.81e-08	6.46	7.91781	0.201	cg13520736	TPD52L1;TPD52L1;TPD52L1;TPD52L1	NM_001003395;NM_003287;NM_001003397;NM_001003396	Body;Body;Body;Body	125543048	125543171	NC_000006.11
cg17376853	1.06e-05	5.83e-08	6.46	7.91473	0.259	cg17376853	SIGIRR;SIGIRR;SIGIRR	NM_001135054;NM_021805;NM_001135053	Body;Body;Body	405970	406093	NC_000011.9
cg08886695	1.07e-05	5.85e-08	6.46	7.91172	0.205	cg08886695	RGS12;RGS12	NM_198229;NM_002926	Body;Body	3369023	3369146	NC_000004.11
cg08639948	1.07e-05	5.85e-08	6.46	7.91012	0.17	cg08639948				36591237	36591360	NC_000001.10
cg14358282	1.07e-05	5.86e-08	6.46	7.90957	0.269	cg14358282	MIR375	NR_029867	TSS200	219866628	219866751	NC_000002.11
cg17167852	1.07e-05	5.88e-08	6.46	7.90639	0.266	cg17167852	PCSK9	NM_174936	TSS200	55505189	55505312	NC_000001.10
cg25429719	1.07e-05	5.88e-08	6.46	7.90571	0.243	cg25429719	CRYGD	NM_006891	TSS200	208989324	208989447	NC_000002.11
cg00028013	1.08e-05	5.92e-08	6.46	7.89869	0.213	cg00028013	LOXL1	NM_005576	TSS200	74218697	74218820	NC_000015.9
cg06650250	1.08e-05	5.93e-08	6.46	7.89824	0.266	cg06650250	LRCH1;LRCH1;LRCH1	NM_015116;NM_001164213;NM_001164211	Body;Body;Body	47197058	47197181	NC_000013.10
cg04566826	1.08e-05	5.94e-08	6.46	7.89644	0.289	cg04566826	KCTD15;KCTD15;KCTD15	NM_001129994;NM_001129995;NM_024076	5'UTR;5'UTR;5'UTR	34289872	34289995	NC_000019.9
cg17619311	1.08e-05	5.94e-08	6.46	7.89569	0.208	cg17619311	ZNF662;ZNF662;ZNF662	NM_001134656;NM_207404;NM_207404	TSS200;5'UTR;1stExon	42947565	42947688	NC_000003.11
cg17154629	1.08e-05	5.95e-08	6.46	7.89489	0.133	cg17154629				118357077	118357200	NC_000023.10
cg22389137	1.08e-05	5.96e-08	6.46	7.89264	0.217	cg22389137				113432227	113432350	NC_000004.11
cg14625175	1.08e-05	5.96e-08	6.46	7.89229	0.379	cg14625175	HOXA10;HOXA10	NM_018951;NM_153715	TSS200;Body	27214056	27214179	NC_000007.13
cg06479609	1.08e-05	5.97e-08	6.46	7.89062	0.242	cg06479609	INTS6;INTS6	NM_012141;NM_001039937	Body;Body	51971623	51971746	NC_000013.10
cg26006951	1.08e-05	5.98e-08	6.45	7.88904	0.138	cg26006951	TERT;TERT	NM_198253;NM_198255	TSS1500;TSS1500	1295988	1296111	NC_000005.9
cg06515771	1.08e-05	5.98e-08	6.45	7.88837	0.211	cg06515771				26614168	26614291	NC_000006.11
cg02367696	1.08e-05	5.99e-08	6.45	7.88779	0.237	cg02367696	FLJ41350	NR_029380	Body	102996464	102996587	NC_000010.10
cg15932013	1.09e-05	6.01e-08	6.45	7.88503	0.353	cg15932013	FLJ22536	NR_015410	TSS200	21666659	21666782	NC_000006.11
cg03536657	1.09e-05	6.01e-08	6.45	7.88437	0.157	cg03536657	C15orf28;ANP32A	NR_026808;NM_006305	TSS1500;Body	69099834	69099957	NC_000015.9
cg06554535	1.09e-05	6.04e-08	6.45	7.87898	0.126	cg06554535	PARVA	NM_018222	Body	12399973	12400096	NC_000011.9
cg25835226	1.09e-05	6.04e-08	6.45	7.87851	0.163	cg25835226				88149632	88149755	NC_000010.10
cg12201155	1.09e-05	6.05e-08	6.45	7.87822	0.133	cg12201155	MAEA;MAEA	NM_005882;NM_001017405	Body;Body	1290568	1290691	NC_000004.11
cg02259047	1.09e-05	6.06e-08	6.45	7.87559	0.193	cg02259047	XRCC3;XRCC3;XRCC3	NM_001100119;NM_005432;NM_001100118	Body;Body;Body	104175555	104175678	NC_000014.8
cg00770998	1.09e-05	6.07e-08	6.45	7.87507	0.151	cg00770998				61119707	61119830	NC_000014.8
cg18125241	1.09e-05	6.07e-08	6.45	7.87456	0.188	cg18125241	NCDN;NCDN;NCDN	NM_001014841;NM_014284;NM_001014839	Body;Body;Body	36026419	36026542	NC_000001.10
cg26881535	1.09e-05	6.07e-08	6.45	7.87361	0.101	cg26881535	RAB3GAP2;AURKAPS1	NM_012414;NR_001587	Body;Body	220440947	220441070	NC_000001.10
cg08523865	1.1e-05	6.1e-08	6.45	7.86989	0.199	cg08523865	CNTNAP5	NM_130773	TSS1500	124782253	124782376	NC_000002.11
cg07408835	1.1e-05	6.1e-08	6.45	7.86958	0.129	cg07408835	PCDHAC1;PCDHA7;PCDHAC1;PCDHA12;PCDHA6;PCDHA10;PCDHA4;PCDHA11;PCDHA8;PCDHAC1;PCDHA6;PCDHA1;PCDHA2;PCDHA9;PCDHA1;PCDHAC1;PCDHA13;PCDHA5;PCDHA3;PCDHA10	NM_031882;NM_018910;NM_018898;NM_018903;NM_018909;NM_018901;NM_018907;NM_018902;NM_018911;NM_031882;NM_031849;NM_031411;NM_018905;NM_031857;NM_018900;NM_018898;NM_018904;NM_018908;NM_018906;NM_031860	1stExon;Body;5'UTR;Body;Body;Body;Body;Body;Body;5'UTR;Body;Body;Body;Body;Body;1stExon;Body;Body;Body;Body	140306377	140306500	NC_000005.9
cg00187692	1.1e-05	6.1e-08	6.45	7.86927	0.316	cg00187692	WDFY2	NM_052950	Body	52199954	52200077	NC_000013.10
cg25707767	1.1e-05	6.12e-08	6.45	7.86561	0.229	cg25707767	RSPH10B;RSPH10B2	NM_173565;NM_001099697	5'UTR;5'UTR	6793977	6794100	NC_000007.13
cg07197059	1.1e-05	6.13e-08	6.45	7.86451	0.206	cg07197059	EFS;EFS	NM_032459;NM_005864	TSS1500;TSS1500	23836012	23836135	NC_000014.8
cg10477592	1.1e-05	6.15e-08	6.45	7.86141	0.267	cg10477592				34406589	34406712	NC_000021.8
cg13329862	1.1e-05	6.15e-08	6.45	7.86115	0.179	cg13329862	DDR1;DDR1	NM_001954;NM_013993	TSS1500;TSS1500	30850876	30850999	NC_000006.11
cg13866320	1.1e-05	6.15e-08	6.45	7.86097	0.188	cg13866320	SEMA4D	NM_001142287	Body	91977542	91977665	NC_000009.11
cg24302529	1.1e-05	6.17e-08	6.45	7.8585	0.173	cg24302529	ALOX5	NM_000698	Body	45923083	45923206	NC_000010.10
cg23979954	1.11e-05	6.19e-08	6.44	7.85512	0.277	cg23979954	IFLTD1	NM_001145727	TSS200	25801601	25801724	NC_000012.11
cg01758512	1.11e-05	6.22e-08	6.44	7.85047	0.193	cg01758512	FUT9;FUT9	NM_006581;NM_006581	5'UTR;1stExon	96463902	96464025	NC_000006.11
cg20029881	1.11e-05	6.22e-08	6.44	7.8499	0.223	cg20029881	LRP1	NM_002332	Body	57545877	57546000	NC_000012.11
cg20243900	1.12e-05	6.25e-08	6.44	7.84631	0.181	cg20243900	ADAT3;SCAMP4	NM_138422;NM_079834	5'UTR;5'UTR	1908388	1908511	NC_000019.9
cg11442173	1.12e-05	6.28e-08	6.44	7.84039	0.202	cg11442173	CYB561;CYB561;CYB561	NM_001017917;NM_001017916;NM_001915	5'UTR;5'UTR;5'UTR	61515312	61515435	NC_000017.10
cg10262662	1.12e-05	6.29e-08	6.44	7.83887	0.123	cg10262662	VAC14	NM_018052	3'UTR	70721696	70721819	NC_000016.9
cg17173767	1.12e-05	6.3e-08	6.44	7.83796	0.114	cg17173767	C8orf84	NM_153225	1stExon	74005267	74005390	NC_000008.10
cg26955287	1.12e-05	6.3e-08	6.44	7.83727	0.153	cg26955287	ASPSCR1	NM_024083	Body	79958912	79959035	NC_000017.10
cg24052359	1.12e-05	6.32e-08	6.44	7.83487	0.258	cg24052359				156813574	156813697	NC_000007.13
cg15996183	1.13e-05	6.33e-08	6.44	7.83239	0.202	cg15996183	LOC151174;LOC151174	NR_026926;NR_026925	Body;Body	239134630	239134753	NC_000002.11
cg17465752	1.13e-05	6.34e-08	6.44	7.83171	0.183	cg17465752				22561149	22561272	NC_000008.10
cg15126179	1.13e-05	6.35e-08	6.44	7.83005	0.213	cg15126179				79181338	79181461	NC_000013.10
cg03710889	1.13e-05	6.35e-08	6.44	7.8293	0.233	cg03710889	SLC11A1	NM_000578	Body	219252818	219252941	NC_000002.11
cg11706999	1.13e-05	6.37e-08	6.44	7.8274	0.212	cg11706999	SH3BP5L	NM_030645	3'UTR	249105862	249105985	NC_000001.10
cg23781334	1.13e-05	6.37e-08	6.44	7.82701	0.179	cg23781334				1772062	1772185	NC_000004.11
cg00097146	1.13e-05	6.37e-08	6.44	7.82677	0.294	cg00097146	SIX3	NM_005413	Body	45171818	45171941	NC_000002.11
cg25099065	1.13e-05	6.38e-08	6.44	7.82513	0.282	cg25099065	ANXA4	NM_001153	5'UTR	69994225	69994348	NC_000002.11
cg26521404	1.13e-05	6.39e-08	6.44	7.82292	0.324	cg26521404	HOXA9	NM_152739	1stExon	27204981	27205104	NC_000007.13
cg02475301	1.13e-05	6.4e-08	6.44	7.82237	0.155	cg02475301	MRGPRE	NM_001039165	TSS1500	3253838	3253961	NC_000011.9
cg18133072	1.14e-05	6.42e-08	6.43	7.81896	0.12	cg18133072	XKR8	NM_018053	Body	28287782	28287905	NC_000001.10
cg22266877	1.14e-05	6.43e-08	6.43	7.81749	0.12	cg22266877	KCNK4	NM_033310	TSS1500	64058550	64058673	NC_000011.9
cg24854704	1.14e-05	6.44e-08	6.43	7.81638	0.161	cg24854704				539420	539543	NC_000005.9
cg24753662	1.14e-05	6.46e-08	6.43	7.81348	0.297	cg24753662	TBX1;TBX1;TBX1	NM_080646;NM_005992;NM_080647	5'UTR;5'UTR;5'UTR	19746984	19747107	NC_000022.10
cg05618807	1.14e-05	6.47e-08	6.43	7.81104	0.161	cg05618807				14376820	14376943	NC_000019.9
cg24366557	1.14e-05	6.47e-08	6.43	7.81081	0.217	cg24366557	TFAP2B	NM_003221	Body	50787650	50787773	NC_000006.11
cg18633230	1.14e-05	6.48e-08	6.43	7.8104	0.213	cg18633230	PRKAG2;PRKAG2	NM_016203;NM_001040633	Body;Body	151425104	151425227	NC_000007.13
cg16662451	1.14e-05	6.48e-08	6.43	7.80922	0.228	cg16662451	FBXW10;FBXW10	NM_031456;NM_031456	5'UTR;1stExon	18647507	18647630	NC_000017.10
cg11878182	1.14e-05	6.49e-08	6.43	7.80893	0.115	cg11878182	ZNF706;ZNF706;ZNF706;ZNF706;ZNF706;ZNF706	NM_001042510;NM_001042511;NM_001042511;NM_016096;NM_001042510;NM_016096	5'UTR;5'UTR;1stExon;5'UTR;1stExon;1stExon	102217722	102217845	NC_000008.10
cg00163510	1.14e-05	6.49e-08	6.43	7.80814	0.212	cg00163510	PTPN14	NM_005401	5'UTR	214722952	214723075	NC_000001.10
cg06893296	1.14e-05	6.49e-08	6.43	7.80809	0.217	cg06893296				30095136	30095259	NC_000006.11
cg27172175	1.14e-05	6.49e-08	6.43	7.80802	0.276	cg27172175				41495032	41495155	NC_000017.10
cg21144493	1.14e-05	6.49e-08	6.43	7.80798	0.205	cg21144493	CAMTA1	NM_015215	Body	7130061	7130184	NC_000001.10
cg20653012	1.14e-05	6.49e-08	6.43	7.80758	0.292	cg20653012	C2orf89	NM_001080824	Body	85107488	85107611	NC_000002.11
cg04602284	1.14e-05	6.5e-08	6.43	7.80627	0.235	cg04602284	C3orf15	NM_033364	Body	119422283	119422406	NC_000003.11
cg13482308	1.14e-05	6.51e-08	6.43	7.80483	0.271	cg13482308	PAX5	NM_016734	Body	37002685	37002808	NC_000009.11
cg10767141	1.14e-05	6.52e-08	6.43	7.80449	0.207	cg10767141	HOXA11AS;HOXA11	NR_002795;NM_005523	Body;TSS1500	27225143	27225266	NC_000007.13
cg21245816	1.14e-05	6.52e-08	6.43	7.80388	0.255	cg21245816	LOC153684	NR_015447	Body	43044675	43044798	NC_000005.9
cg23490077	1.14e-05	6.53e-08	6.43	7.80205	0.237	cg23490077				112610645	112610768	NC_000006.11
cg20058744	1.14e-05	6.53e-08	6.43	7.80184	0.224	cg20058744	C11orf66;C11orf66	NM_001170753;NM_145017	Body;Body	61257511	61257634	NC_000011.9
cg13127506	1.14e-05	6.53e-08	6.43	7.80153	0.218	cg13127506	CDK2AP1	NM_004642	TSS1500	123757018	123757141	NC_000012.11
cg14146740	1.14e-05	6.54e-08	6.43	7.8015	0.13	cg14146740				50818424	50818547	NC_000006.11
cg06730796	1.14e-05	6.54e-08	6.43	7.80143	0.12	cg06730796	FHOD1	NM_013241	Body	67271014	67271137	NC_000016.9
cg15747595	1.14e-05	6.54e-08	6.43	7.80085	0.241	cg15747595	TSPYL5	NM_033512	1stExon	98289880	98290003	NC_000008.10
cg18487916	1.15e-05	6.55e-08	6.43	7.79957	0.162	cg18487916	NEK4	NM_003157	Body	52748469	52748592	NC_000003.11
cg08983011	1.15e-05	6.55e-08	6.43	7.79925	0.274	cg08983011	BCL9L	NM_182557	Body	118774009	118774132	NC_000011.9
cg08005093	1.15e-05	6.55e-08	6.43	7.79865	0.192	cg08005093	AXIN2	NM_004655	Body	63532898	63533021	NC_000017.10
cg01789499	1.15e-05	6.56e-08	6.43	7.79835	0.208	cg01789499	PRDM8	NM_020226	5'UTR	81109888	81110011	NC_000004.11
cg13518121	1.15e-05	6.56e-08	6.43	7.79738	0.201	cg13518121	PARVA	NM_018222	Body	12434385	12434508	NC_000011.9
cg11423556	1.15e-05	6.57e-08	6.43	7.79668	0.195	cg11423556	AAK1	NM_014911	Body	69728114	69728237	NC_000002.11
cg00034559	1.15e-05	6.59e-08	6.43	7.79394	0.176	cg00034559	TMEM178;TMEM178	NM_152390;NM_001167959	TSS1500;TSS1500	39892124	39892247	NC_000002.11
cg02611085	1.15e-05	6.62e-08	6.43	7.78867	0.2	cg02611085	KCP;KCP	NM_199349;NM_001135914	Body;Body	128550410	128550533	NC_000007.13
cg21000533	1.15e-05	6.63e-08	6.42	7.78677	0.211	cg21000533	PPM1H	NM_020700	Body	63078130	63078253	NC_000012.11
cg13172549	1.16e-05	6.64e-08	6.42	7.7851	0.243	cg13172549	HOXA3;HOXA3;HOXA3	NM_153631;NM_030661;NM_153632	5'UTR;5'UTR;TSS200	27153636	27153759	NC_000007.13
cg18055623	1.16e-05	6.65e-08	6.42	7.78485	0.197	cg18055623	CACNG8;MIR935	NM_031895;NR_030632	Body;TSS1500	54485327	54485450	NC_000019.9
cg11797485	1.16e-05	6.65e-08	6.42	7.78476	0.175	cg11797485	ANP32A	NM_006305	Body	69107085	69107208	NC_000015.9
cg02313829	1.16e-05	6.68e-08	6.42	7.78053	0.116	cg02313829	KLHL35	NM_001039548	Body	75136574	75136697	NC_000011.9
cg05300378	1.16e-05	6.71e-08	6.42	7.77586	0.106	cg05300378				74128731	74128854	NC_000017.10
cg09134593	1.16e-05	6.71e-08	6.42	7.77552	0.051	cg09134593	ADAMTS8	NM_007037	1stExon	130297528	130297651	NC_000011.9
cg21660452	1.17e-05	6.74e-08	6.42	7.77119	0.2	cg21660452	NRXN2;NRXN2;NRXN2	NM_138734;NM_138732;NM_015080	Body;Body;Body	64397807	64397930	NC_000011.9
cg03775372	1.17e-05	6.74e-08	6.42	7.77031	0.182	cg03775372	FRMD4A	NM_018027	Body	13830045	13830168	NC_000010.10
cg17442776	1.17e-05	6.78e-08	6.42	7.76551	0.154	cg17442776				147718540	147718663	NC_000001.10
cg11794120	1.17e-05	6.78e-08	6.42	7.7649	0.0743	cg11794120	MAD1L1;MAD1L1;MAD1L1	NM_003550;NM_001013837;NM_001013836	Body;Body;Body	2087905	2088028	NC_000007.13
cg11896587	1.17e-05	6.79e-08	6.42	7.76416	0.0716	cg11896587	FBXO17;FBXO17	NM_024907;NM_148169	Body;Body	39440734	39440857	NC_000019.9
cg06688733	1.18e-05	6.82e-08	6.42	7.75988	0.184	cg06688733				42813842	42813965	NC_000005.9
cg19358373	1.18e-05	6.82e-08	6.42	7.75897	0.143	cg19358373				133414571	133414694	NC_000012.11
cg24576535	1.18e-05	6.83e-08	6.42	7.75769	0.287	cg24576535				113417997	113418120	NC_000003.11
cg01942226	1.18e-05	6.85e-08	6.42	7.75464	0.175	cg01942226	TRIM2;TRIM2	NM_015271;NM_001130067	Body;Body	154218350	154218473	NC_000004.11
cg16775752	1.18e-05	6.86e-08	6.42	7.75355	0.193	cg16775752	ARHGAP22	NM_021226	Body	49674530	49674653	NC_000010.10
cg20943095	1.19e-05	6.87e-08	6.41	7.75171	0.194	cg20943095	CPLX3	NM_001030005	3'UTR	75123394	75123517	NC_000015.9
cg20170533	1.19e-05	6.91e-08	6.41	7.74568	0.275	cg20170533	DLEU7;DLEU7	NM_198989;NM_198989	1stExon;5'UTR	51417846	51417969	NC_000013.10
cg04768479	1.19e-05	6.92e-08	6.41	7.74527	0.159	cg04768479				30095292	30095415	NC_000006.11
cg03242698	1.19e-05	6.92e-08	6.41	7.74503	0.25	cg03242698	FLJ41350	NR_029380	Body	102997382	102997505	NC_000010.10
cg13860849	1.19e-05	6.93e-08	6.41	7.74387	0.198	cg13860849	CD248	NM_020404	1stExon	66084469	66084592	NC_000011.9
cg00513941	1.19e-05	6.94e-08	6.41	7.74219	0.367	cg00513941				42437245	42437368	NC_000019.9
cg02925805	1.19e-05	6.94e-08	6.41	7.74158	0.061	cg02925805				298484	298607	NC_000012.11
cg04007726	1.19e-05	6.95e-08	6.41	7.74132	0.259	cg04007726	ZMIZ1	NM_020338	Body	80981129	80981252	NC_000010.10
cg14172108	1.19e-05	6.97e-08	6.41	7.7383	0.188	cg14172108				34405553	34405676	NC_000021.8
cg19402991	1.19e-05	6.97e-08	6.41	7.73795	0.211	cg19402991				164204915	164205038	NC_000002.11
cg01589054	1.2e-05	7.01e-08	6.41	7.7328	0.149	cg01589054	VGLL4	NM_014667	5'UTR	11744933	11745056	NC_000003.11
cg19494811	1.2e-05	7.01e-08	6.41	7.73225	0.31	cg19494811	NUDT3	NM_006703	Body	34356253	34356376	NC_000006.11
cg01128642	1.2e-05	7.03e-08	6.41	7.72876	0.307	cg01128642	OSR1	NM_145260	TSS1500	19558808	19558931	NC_000002.11
cg04833514	1.2e-05	7.04e-08	6.41	7.72842	0.197	cg04833514	SLC6A9	NM_001024845	TSS1500	44497537	44497660	NC_000001.10
cg05250797	1.2e-05	7.04e-08	6.41	7.72835	0.229	cg05250797				70222502	70222625	NC_000016.9
cg27425709	1.2e-05	7.04e-08	6.41	7.72796	0.215	cg27425709				111446533	111446656	NC_000002.11
cg27665571	1.2e-05	7.05e-08	6.41	7.7259	0.126	cg27665571				70624354	70624477	NC_000016.9
cg13572782	1.21e-05	7.08e-08	6.41	7.72277	0.187	cg13572782	MBP;MBP	NM_001025100;NM_001025101	Body;Body	74799495	74799618	NC_000018.9
cg14916983	1.21e-05	7.08e-08	6.41	7.72273	0.178	cg14916983	C15orf23;C15orf23;C15orf23	NM_001142762;NM_001142761;NM_033286	TSS200;TSS200;TSS200	40674883	40675006	NC_000015.9
cg11236526	1.21e-05	7.09e-08	6.41	7.72161	0.113	cg11236526				64430940	64431063	NC_000003.11
cg00347798	1.21e-05	7.09e-08	6.41	7.72104	0.249	cg00347798				45077649	45077772	NC_000003.11
cg07398954	1.21e-05	7.1e-08	6.41	7.7192	0.0959	cg07398954	NCOR2;NCOR2	NM_006312;NM_001077261	Body;Body	124856557	124856680	NC_000012.11
cg24854435	1.21e-05	7.11e-08	6.4	7.71784	0.141	cg24854435	LOC388692	NR_027002	Body	149287082	149287205	NC_000001.10
cg18716912	1.21e-05	7.11e-08	6.4	7.71777	0.319	cg18716912	POLR2B	NM_000938	Body	57861927	57862050	NC_000004.11
cg05502283	1.21e-05	7.12e-08	6.4	7.71624	0.17	cg05502283	NFIX	NM_002501	3'UTR	13203715	13203838	NC_000019.9
cg13694466	1.21e-05	7.13e-08	6.4	7.71599	0.189	cg13694466	SEPHS1	NM_012247	Body	13382122	13382245	NC_000010.10
cg06424065	1.22e-05	7.15e-08	6.4	7.7125	0.27	cg06424065				6247640	6247763	NC_000004.11
cg02309355	1.22e-05	7.16e-08	6.4	7.71164	0.185	cg02309355	KIAA0513	NM_014732	5'UTR	85074359	85074482	NC_000016.9
cg27152219	1.22e-05	7.2e-08	6.4	7.70598	0.209	cg27152219				20139028	20139151	NC_000013.10
cg12803053	1.22e-05	7.2e-08	6.4	7.70575	0.312	cg12803053	NSMCE2	NM_173685	Body	126142264	126142387	NC_000008.10
cg12076463	1.22e-05	7.21e-08	6.4	7.70411	0.241	cg12076463	NKX6-1	NM_006168	Body	85418265	85418388	NC_000004.11
cg05638347	1.22e-05	7.22e-08	6.4	7.70372	0.117	cg05638347	USP42	NM_032172	Body	6188723	6188846	NC_000007.13
cg01968002	1.22e-05	7.23e-08	6.4	7.70215	0.192	cg01968002	SNX33;SNX33	NM_153271;NM_153271	5'UTR;1stExon	75941357	75941480	NC_000015.9
cg24136205	1.22e-05	7.23e-08	6.4	7.7021	0.23	cg24136205	ZIC5	NM_033132	TSS200	100624293	100624416	NC_000013.10
cg26202753	1.22e-05	7.23e-08	6.4	7.70172	0.261	cg26202753				1850203	1850326	NC_000007.13
cg11228250	1.22e-05	7.23e-08	6.4	7.70172	0.182	cg11228250	PLA2R1;PLA2R1	NM_001007267;NM_007366	TSS200;TSS200	160919282	160919405	NC_000002.11
cg16650630	1.22e-05	7.24e-08	6.4	7.7006	0.152	cg16650630				40364862	40364985	NC_000015.9
cg06397161	1.23e-05	7.24e-08	6.4	7.69966	0.175	cg06397161	SYNGR1;SYNGR1;SYNGR1	NM_004711;NM_145738;NM_145731	Body;TSS200;Body	39760059	39760182	NC_000022.10
cg27256309	1.23e-05	7.25e-08	6.4	7.69937	0.208	cg27256309	MAMSTR;MAMSTR	NM_182574;NM_001130915	TSS1500;Body	49220485	49220608	NC_000019.9
cg06224178	1.23e-05	7.26e-08	6.4	7.69809	0.184	cg06224178	ASAP1	NM_018482	Body	131360571	131360694	NC_000008.10
cg20610452	1.23e-05	7.28e-08	6.4	7.69486	0.312	cg20610452				9235898	9236021	NC_000002.11
cg16105687	1.23e-05	7.31e-08	6.4	7.69028	0.174	cg16105687				22805801	22805924	NC_000019.9
cg07318204	1.24e-05	7.33e-08	6.4	7.68764	0.189	cg07318204	HHIP	NM_022475	TSS1500	145566441	145566564	NC_000004.11
cg21839338	1.24e-05	7.34e-08	6.4	7.68639	0.125	cg21839338	FAM18A	NM_001079512	Body	10912331	10912454	NC_000016.9
cg20284019	1.24e-05	7.35e-08	6.4	7.68571	0.169	cg20284019				33548566	33548689	NC_000018.9
cg20078405	1.24e-05	7.36e-08	6.4	7.68452	0.248	cg20078405	MAP3K9	NM_033141	TSS1500	71277095	71277218	NC_000014.8
cg09032630	1.24e-05	7.39e-08	6.39	7.68048	0.164	cg09032630	HIST1H2AL	NM_003511	TSS1500	27831956	27832079	NC_000006.11
cg06999762	1.25e-05	7.42e-08	6.39	7.67655	0.252	cg06999762				53093007	53093130	NC_000015.9
cg17454920	1.25e-05	7.42e-08	6.39	7.67639	0.0983	cg17454920	C14orf43;C14orf43	NM_194278;NM_001043318	3'UTR;3'UTR	74185993	74186116	NC_000014.8
cg26732615	1.25e-05	7.42e-08	6.39	7.6757	0.155	cg26732615	CILP2;YJEFN3	NM_153221;NM_198537	TSS1500;3'UTR	19648335	19648458	NC_000019.9
cg06386478	1.25e-05	7.43e-08	6.39	7.67472	0.246	cg06386478	CSGALNACT1;CSGALNACT1;CSGALNACT1	NM_001130518;NR_024040;NM_018371	TSS200;Body;5'UTR	19460136	19460259	NC_000008.10
cg25599211	1.25e-05	7.44e-08	6.39	7.67388	0.141	cg25599211	P4HA3	NM_182904	TSS1500	74023050	74023173	NC_000011.9
cg13442749	1.25e-05	7.46e-08	6.39	7.67108	0.197	cg13442749	PHF2	NM_005392	TSS1500	96337681	96337804	NC_000009.11
cg24495344	1.25e-05	7.46e-08	6.39	7.67106	0.254	cg24495344	COL11A1;COL11A1;COL11A1;COL11A1	NM_080630;NM_001854;NM_001168249;NM_080629	TSS200;TSS200;TSS200;TSS200	103574097	103574220	NC_000001.10
cg17076667	1.26e-05	7.49e-08	6.39	7.66676	0.201	cg17076667	BAG3	NM_004281	Body	121418050	121418173	NC_000010.10
cg23079252	1.26e-05	7.49e-08	6.39	7.66644	0.29	cg23079252				30095199	30095322	NC_000006.11
cg12053891	1.26e-05	7.49e-08	6.39	7.66642	0.242	cg12053891				62168512	62168635	NC_000011.9
cg19728226	1.26e-05	7.55e-08	6.39	7.65915	0.246	cg19728226				176968744	176968867	NC_000002.11
cg12597389	1.27e-05	7.58e-08	6.39	7.65529	0.261	cg12597389	NXPH1	NM_152745	Body	8482235	8482358	NC_000007.13
cg11028052	1.27e-05	7.58e-08	6.39	7.65504	0.129	cg11028052	KIAA1199	NM_018689	5'UTR	81154387	81154510	NC_000015.9
cg05314142	1.27e-05	7.58e-08	6.39	7.65436	0.221	cg05314142	SLC22A1;SLC22A1	NM_153187;NM_003057	TSS200;TSS200	160542711	160542834	NC_000006.11
cg17239974	1.27e-05	7.61e-08	6.39	7.65107	0.174	cg17239974	KCNQ1DN	NR_024627	TSS1500	2890629	2890752	NC_000011.9
cg06658625	1.27e-05	7.61e-08	6.39	7.65051	0.072	cg06658625	SERPIND1;PI4KA	NM_000185;NM_058004	5'UTR;Body	21133553	21133676	NC_000022.10
cg17342132	1.28e-05	7.73e-08	6.41	7.64859	0.292	cg17342132	NR3C1;NR3C1;NR3C1;NR3C1;NR3C1;NR3C1;NR3C1	NM_001018076;NM_000176;NM_001024094;NM_001020825;NM_001018075;NM_001018077;NM_001018074	Body;Body;Body;Body;Body;Body;Body	142780254	142780377	NC_000005.9
cg24664470	1.27e-05	7.64e-08	6.38	7.6471	0.255	cg24664470				208976933	208977056	NC_000002.11
cg21511941	1.28e-05	7.67e-08	6.38	7.6439	0.198	cg21511941	GRAMD2	NM_001012642	Body	72489609	72489732	NC_000015.9
cg06438517	1.28e-05	7.67e-08	6.38	7.64355	0.241	cg06438517				16861620	16861743	NC_000001.10
cg25665606	1.28e-05	7.69e-08	6.38	7.64103	0.196	cg25665606	KLHDC7B	NM_138433	TSS1500	50986051	50986174	NC_000022.10
cg19010490	1.28e-05	7.69e-08	6.38	7.64059	0.244	cg19010490	MEIS2;MEIS2;MEIS2;MEIS2;MEIS2;MEIS2;MEIS2	NM_172316;NM_170674;NM_170675;NM_172315;NM_002399;NM_170677;NM_170676	Body;Body;Body;Body;Body;Body;Body	37388127	37388250	NC_000015.9
cg09476130	1.28e-05	7.73e-08	6.38	7.63601	0.321	cg09476130	CCDC19	NM_012337	TSS200	159870086	159870209	NC_000001.10
cg03614193	1.28e-05	7.73e-08	6.38	7.63532	0.228	cg03614193	ST8SIA3	NM_015879	Body	55021542	55021665	NC_000018.9
cg13469457	1.29e-05	7.74e-08	6.38	7.63411	0.215	cg13469457				110501986	110502109	NC_000009.11
cg07568117	1.29e-05	7.75e-08	6.38	7.63351	0.157	cg07568117	PKD1;PKD1	NM_000296;NM_001009944	3'UTR;3'UTR	2139114	2139237	NC_000016.9
cg21723184	1.29e-05	7.75e-08	6.38	7.63295	0.131	cg21723184	CPT1C;CPT1C	NM_001136052;NM_152359	5'UTR;5'UTR	50195112	50195235	NC_000019.9
cg18369516	1.29e-05	7.78e-08	6.38	7.62927	0.272	cg18369516	ZBTB46	NM_025224	Body	62406721	62406844	NC_000020.10
cg07329296	1.29e-05	7.78e-08	6.38	7.62916	0.102	cg07329296	ADRM1;ADRM1	NM_007002;NM_175573	Body;Body	60882647	60882770	NC_000020.10
cg23371754	1.29e-05	7.79e-08	6.38	7.62802	0.209	cg23371754	ANK2;ANK2;ANK2	NM_001148;NM_001127493;NM_020977	Body;Body;Body	114214449	114214572	NC_000004.11
cg01294327	1.29e-05	7.8e-08	6.38	7.62673	0.153	cg01294327	LINGO3	NM_001101391	Body	2291373	2291496	NC_000019.9
cg05486035	1.29e-05	7.8e-08	6.38	7.62637	0.295	cg05486035				56697088	56697211	NC_000016.9
cg04892182	1.29e-05	7.81e-08	6.38	7.62565	0.207	cg04892182	KIAA1522	NM_020888	Body	33231382	33231505	NC_000001.10
cg13490403	1.29e-05	7.82e-08	6.38	7.62446	0.278	cg13490403	LHX6;LHX6	NM_199160;NM_014368	Body;Body	124982413	124982536	NC_000009.11
cg21002957	1.29e-05	7.83e-08	6.38	7.62241	0.281	cg21002957	RASAL3	NM_022904	Body	15568894	15569017	NC_000019.9
cg18451016	1.29e-05	7.84e-08	6.38	7.62182	0.32	cg18451016				38461880	38462003	NC_000001.10
cg05896193	1.3e-05	7.85e-08	6.38	7.62043	0.196	cg05896193	DNMT3A;DNMT3A;DNMT3A	NM_022552;NM_175630;NM_175629	5'UTR;5'UTR;5'UTR	25563141	25563264	NC_000002.11
cg12334871	1.3e-05	7.86e-08	6.38	7.61883	0.225	cg12334871	SYNPO	NM_001166208	5'UTR	149993971	149994094	NC_000005.9
cg26840462	1.3e-05	7.88e-08	6.38	7.61633	0.2	cg26840462	PKNOX2	NM_022062	5'UTR	125220543	125220666	NC_000011.9
cg09052626	1.3e-05	7.89e-08	6.37	7.61502	0.225	cg09052626				86603583	86603706	NC_000016.9
cg07332769	1.3e-05	7.89e-08	6.37	7.61496	0.173	cg07332769				149672151	149672274	NC_000001.10
cg03631455	1.3e-05	7.91e-08	6.37	7.61347	0.238	cg03631455	PCDHB13	NM_018933	1stExon	140595072	140595195	NC_000005.9
cg05512327	1.3e-05	7.91e-08	6.37	7.61337	0.231	cg05512327	SHOX2;SHOX2;SHOX2	NM_001163678;NM_006884;NM_003030	Body;Body;Body	157821987	157822110	NC_000003.11
cg16508883	1.3e-05	7.92e-08	6.37	7.61197	0.201	cg16508883				145092330	145092453	NC_000001.10
cg03357952	1.3e-05	7.92e-08	6.37	7.61138	0.188	cg03357952				1027974	1028097	NC_000004.11
cg13537416	1.3e-05	7.92e-08	6.37	7.6111	0.26	cg13537416	DAB2IP;DAB2IP	NM_032552;NM_138709	Body;5'UTR	124506555	124506678	NC_000009.11
cg14152222	1.3e-05	7.94e-08	6.37	7.60903	0.161	cg14152222	MRGPRF;MRGPRF;MRGPRF;MRGPRF	NM_001098515;NM_145015;NM_001098515;NM_145015	5'UTR;1stExon;1stExon;5'UTR	68780661	68780784	NC_000011.9
cg18191867	1.31e-05	7.99e-08	6.37	7.60356	0.102	cg18191867				65722872	65722995	NC_000001.10
cg18240400	1.31e-05	8.01e-08	6.37	7.60058	0.162	cg18240400	ANUBL1;ANUBL1	NM_001128324;NM_174890	TSS1500;TSS1500	46168597	46168720	NC_000010.10
cg20476329	1.31e-05	8.01e-08	6.37	7.60041	0.237	cg20476329	COL12A1;COL12A1	NM_004370;NM_080645	Body;Body	75804472	75804595	NC_000006.11
cg23973429	1.31e-05	8.02e-08	6.37	7.59911	0.23	cg23973429	GRHL2;GRHL2	NM_024915;NM_024915	1stExon;5'UTR	102504746	102504869	NC_000008.10
cg00532474	1.31e-05	8.04e-08	6.37	7.59657	0.294	cg00532474	PSTPIP2	NM_024430	TSS1500	43652594	43652717	NC_000018.9
cg04920452	1.31e-05	8.05e-08	6.37	7.59612	0.148	cg04920452	LOC283999	NM_001145529	Body	76227681	76227804	NC_000017.10
cg11018604	1.32e-05	8.05e-08	6.37	7.595	0.321	cg11018604				71507163	71507286	NC_000005.9
cg15190451	1.32e-05	8.06e-08	6.37	7.59481	0.194	cg15190451	SLC16A5	NM_004695	Body	73090195	73090318	NC_000017.10
cg19639898	1.32e-05	8.06e-08	6.37	7.59447	0.179	cg19639898				147826639	147826762	NC_000001.10
cg12816936	1.32e-05	8.06e-08	6.37	7.59405	0.268	cg12816936				128806370	128806493	NC_000003.11
cg19856705	1.32e-05	8.07e-08	6.37	7.5929	0.265	cg19856705				234667500	234667623	NC_000001.10
cg18274788	1.32e-05	8.08e-08	6.37	7.59133	0.251	cg18274788	MIR320B1	NR_031564	TSS1500	117214163	117214286	NC_000001.10
cg04673462	1.32e-05	8.11e-08	6.37	7.5888	0.158	cg04673462				38461896	38462019	NC_000001.10
cg05994850	1.32e-05	8.12e-08	6.37	7.58693	0.188	cg05994850				30095341	30095464	NC_000006.11
cg01896424	1.33e-05	8.16e-08	6.37	7.58208	0.185	cg01896424	NAV2;NAV2;NAV2	NM_182964;NM_001111018;NM_145117	Body;Body;Body	20010227	20010350	NC_000011.9
cg13935577	1.33e-05	8.18e-08	6.36	7.57985	0.177	cg13935577	BTBD11;BTBD11	NM_001017523;NM_001018072	Body;Body	107974897	107975020	NC_000012.11
cg08616111	1.33e-05	8.2e-08	6.36	7.5772	0.201	cg08616111	NFIX	NM_002501	Body	13112808	13112931	NC_000019.9
cg04487296	1.33e-05	8.2e-08	6.36	7.57691	0.331	cg04487296				149389669	149389792	NC_000007.13
cg02633371	1.34e-05	8.24e-08	6.36	7.5731	0.173	cg02633371	LHX1	NM_005568	Body	35298618	35298741	NC_000017.10
cg00771084	1.34e-05	8.24e-08	6.36	7.573	0.118	cg00771084	ATG4B;ATG4B	NM_013325;NM_178326	Body;Body	242598843	242598966	NC_000002.11
cg17226348	1.34e-05	8.24e-08	6.36	7.57245	0.118	cg17226348	LFNG;LFNG;LFNG;LFNG	NM_001166355;NM_001040167;NM_001040168;NM_002304	Body;Body;Body;Body	2566534	2566657	NC_000007.13
cg27395066	1.34e-05	8.24e-08	6.36	7.5723	0.227	cg27395066	ACBD4;ACBD4;ACBD4;ACBD4	NM_001135704;NM_001135706;NM_024722;NM_001135705	3'UTR;3'UTR;3'UTR;3'UTR	43221220	43221343	NC_000017.10
cg12421755	1.34e-05	8.25e-08	6.36	7.57164	0.351	cg12421755	ONECUT1	NM_004498	Body	53080933	53081056	NC_000015.9
cg06864047	1.34e-05	8.25e-08	6.36	7.57112	0.264	cg06864047				97839870	97839993	NC_000007.13
cg12934382	1.34e-05	8.25e-08	6.36	7.57096	0.254	cg12934382	GRM2;GRM2;GRM2;GRM2	NM_001130063;NM_000839;NM_000839;NM_001130063	1stExon;5'UTR;1stExon;5'UTR	51741135	51741258	NC_000003.11
cg19316405	1.34e-05	8.27e-08	6.36	7.56878	0.097	cg19316405	PDDC1	NM_182612	3'UTR	770410	770533	NC_000011.9
cg24025538	1.34e-05	8.27e-08	6.36	7.56861	0.251	cg24025538	PNKP	NM_007254	3'UTR	50364499	50364622	NC_000019.9
cg11746048	1.34e-05	8.3e-08	6.36	7.56546	0.213	cg11746048				65226726	65226849	NC_000011.9
cg24715245	1.34e-05	8.31e-08	6.36	7.56469	0.19	cg24715245	UCHL1	NM_004181	TSS200	41258794	41258917	NC_000004.11
cg16054907	1.34e-05	8.33e-08	6.36	7.562	0.133	cg16054907	MAPK11	NM_002751	Body	50706065	50706188	NC_000022.10
cg04002235	1.35e-05	8.34e-08	6.36	7.56074	0.226	cg04002235				128560443	128560566	NC_000011.9
cg09906145	1.35e-05	8.34e-08	6.36	7.56031	0.12	cg09906145	FAM65A	NM_024519	TSS1500	67562424	67562547	NC_000016.9
cg23251761	1.35e-05	8.35e-08	6.36	7.55998	0.188	cg23251761	PIK3CD	NM_005026	5'UTR	9750061	9750184	NC_000001.10
cg27078890	1.35e-05	8.36e-08	6.36	7.55835	0.231	cg27078890	ETS1	NM_001143820	TSS200	128457459	128457582	NC_000011.9
cg18335796	1.35e-05	8.42e-08	6.36	7.55128	0.248	cg18335796	CALB1	NM_004929	Body	91094472	91094595	NC_000008.10
cg07535740	1.36e-05	8.42e-08	6.36	7.55071	0.164	cg07535740	CAPS;CAPS	NM_080590;NM_004058	3'UTR;3'UTR	5915494	5915617	NC_000019.9
cg16363104	1.36e-05	8.44e-08	6.36	7.54937	0.256	cg16363104	PHLDB2;PLCXD2	NM_001134437;NM_153268	5'UTR;Body	111481341	111481464	NC_000003.11
cg20748242	1.36e-05	8.45e-08	6.36	7.54788	0.196	cg20748242	RNF44	NM_014901	3'UTR	175955925	175956048	NC_000005.9
cg24550149	1.36e-05	8.45e-08	6.36	7.54779	0.238	cg24550149	TTC22	NM_001114108	Body	55246954	55247077	NC_000001.10
cg06458248	1.36e-05	8.46e-08	6.35	7.54638	0.157	cg06458248	NFIX	NM_002501	Body	13117917	13118040	NC_000019.9
cg00731608	1.36e-05	8.46e-08	6.35	7.54635	0.138	cg00731608	TNFAIP2	NM_006291	Body	103593907	103594030	NC_000014.8
cg05219493	1.36e-05	8.48e-08	6.35	7.54415	0.217	cg05219493	CYP26C1	NM_183374	TSS200	94820923	94821046	NC_000010.10
cg08812889	1.36e-05	8.49e-08	6.35	7.54349	0.257	cg08812889				174439925	174440048	NC_000004.11
cg07722657	1.36e-05	8.5e-08	6.35	7.54145	0.23	cg07722657				221060360	221060483	NC_000001.10
cg14527250	1.37e-05	8.52e-08	6.35	7.53968	0.197	cg14527250	WNT5B;WNT5B	NM_030775;NM_032642	Body;Body	1753866	1753989	NC_000012.11
cg20660989	1.37e-05	8.52e-08	6.35	7.53913	0.25	cg20660989				35150136	35150259	NC_000006.11
cg20649017	1.37e-05	8.54e-08	6.35	7.53747	0.243	cg20649017	HOXD10	NM_002148	TSS1500	176980837	176980960	NC_000002.11
cg15365038	1.37e-05	8.54e-08	6.35	7.53736	0.227	cg15365038	PRAF2	NM_007213	Body	48930360	48930483	NC_000023.10
cg13870990	1.37e-05	8.54e-08	6.35	7.53718	0.137	cg13870990	DSC2;DSC2	NM_004949;NM_024422	TSS200;TSS200	28682408	28682531	NC_000018.9
cg04622024	1.37e-05	8.57e-08	6.35	7.53407	0.137	cg04622024	EPHA10	NM_001099439	Body	38201001	38201124	NC_000001.10
cg09654300	1.37e-05	8.57e-08	6.35	7.534	0.267	cg09654300	TRAK1	NM_001042646	1stExon	42132991	42133114	NC_000003.11
cg04422562	1.37e-05	8.59e-08	6.35	7.53167	0.238	cg04422562				155247170	155247293	NC_000007.13
cg03692563	1.37e-05	8.59e-08	6.35	7.53106	0.232	cg03692563				31846414	31846537	NC_000011.9
cg09814487	1.37e-05	8.6e-08	6.35	7.53069	0.214	cg09814487				86598824	86598947	NC_000016.9
cg23076537	1.37e-05	8.62e-08	6.35	7.52829	0.297	cg23076537				93643678	93643801	NC_000010.10
cg03593550	1.38e-05	8.65e-08	6.35	7.52498	0.234	cg03593550	CACNG8;MIR935	NM_031895;NR_030632	Body;TSS200	54485404	54485527	NC_000019.9
cg16703135	1.38e-05	8.67e-08	6.35	7.52224	0.213	cg16703135				55517132	55517255	NC_000007.13
cg17632937	1.38e-05	8.68e-08	6.35	7.5212	0.14	cg17632937	HORMAD2	NM_152510	TSS200	30476326	30476449	NC_000022.10
cg10226952	1.38e-05	8.7e-08	6.35	7.51931	0.0719	cg10226952				75668369	75668492	NC_000003.11
cg05903444	1.38e-05	8.7e-08	6.35	7.51838	0.194	cg05903444	IRX2;C5orf38;IRX2	NM_033267;NM_178569;NM_001134222	Body;TSS1500;Body	2751041	2751164	NC_000005.9
cg19832184	1.38e-05	8.71e-08	6.35	7.51832	0.0654	cg19832184	MYH7B;MIR499	NM_020884;NR_030223	Body;TSS200	33578069	33578192	NC_000020.10
cg12890903	1.39e-05	8.72e-08	6.35	7.5164	0.133	cg12890903	NYNRIN	NM_025081	TSS200	24867954	24868077	NC_000014.8
cg18091615	1.39e-05	8.73e-08	6.35	7.5156	0.278	cg18091615	CREB3L2	NM_194071	Body	137675881	137676004	NC_000007.13
cg06942685	1.39e-05	8.74e-08	6.35	7.51473	0.0818	cg06942685	ZNF542;ZNF542;ZNF542;ZNF542	NR_024056;NR_024057;NR_024055;NR_003127	TSS1500;TSS1500;TSS200;TSS200	56879432	56879555	NC_000019.9
cg10603275	1.39e-05	8.74e-08	6.35	7.51404	0.162	cg10603275	CHL1	NM_006614	5'UTR	239665	239788	NC_000003.11
cg14840966	1.39e-05	8.75e-08	6.35	7.51354	0.215	cg14840966	CDC42BPB	NM_006035	Body	103416389	103416512	NC_000014.8
cg16007395	1.39e-05	8.79e-08	6.34	7.50906	0.103	cg16007395	KIAA1522	NM_020888	Body	33231070	33231193	NC_000001.10
cg15989068	1.39e-05	8.81e-08	6.34	7.50679	0.12	cg15989068	SOX11;SOX11	NM_003108;NM_003108	3'UTR;1stExon	5837057	5837180	NC_000002.11
cg16730908	1.39e-05	8.81e-08	6.34	7.50646	0.192	cg16730908	PSTPIP2	NM_024430	TSS1500	43652592	43652715	NC_000018.9
cg26934759	1.39e-05	8.82e-08	6.34	7.50499	0.09	cg26934759	DEPDC5;DEPDC5	NM_001136029;NM_014662	Body;Body	32251952	32252075	NC_000022.10
cg20725035	1.4e-05	8.84e-08	6.34	7.50319	0.0624	cg20725035	GYG1	NM_004130	TSS200	148709344	148709467	NC_000003.11
cg13974632	1.4e-05	8.84e-08	6.34	7.50316	0.127	cg13974632	BDNF;BDNF;BDNF;BDNF;BDNF	NM_170731;NM_170732;NM_001143806;NM_001143807;NM_001143805	Body;5'UTR;5'UTR;5'UTR;5'UTR	27740813	27740936	NC_000011.9
cg20879959	1.4e-05	8.87e-08	6.34	7.49993	0.153	cg20879959	HLA-A	NM_002116	TSS200	29910208	29910331	NC_000006.11
cg04961101	1.4e-05	8.87e-08	6.34	7.49981	0.157	cg04961101				37303484	37303607	NC_000020.10
cg10485485	1.4e-05	8.88e-08	6.34	7.49832	0.119	cg10485485				70624357	70624480	NC_000016.9
cg08034413	1.4e-05	8.89e-08	6.34	7.49781	0.0891	cg08034413	DCUN1D2	NM_001014283	Body	114115128	114115251	NC_000013.10
cg01216308	1.4e-05	8.9e-08	6.34	7.49695	0.0946	cg01216308	CRB3;CRB3	NM_139161;NM_174881	5'UTR;5'UTR	6464563	6464686	NC_000019.9
cg02582963	1.4e-05	8.91e-08	6.34	7.49526	0.202	cg02582963	SGEF	NM_015595	Body	153840718	153840841	NC_000003.11
cg02086801	1.41e-05	8.96e-08	6.34	7.48963	0.232	cg02086801	OTP	NM_032109	Body	76928406	76928529	NC_000005.9
cg14166284	1.41e-05	8.97e-08	6.34	7.4891	0.187	cg14166284	HLX	NM_021958	Body	221055719	221055842	NC_000001.10
cg26472690	1.41e-05	8.99e-08	6.34	7.48699	0.117	cg26472690	INPP5A	NM_005539	Body	134458209	134458332	NC_000010.10
cg07139329	1.41e-05	8.99e-08	6.34	7.48688	0.225	cg07139329	NAV1;NAV1	NM_001167738;NM_020443	TSS1500;Body	201708558	201708681	NC_000001.10
cg13983307	1.42e-05	9.02e-08	6.34	7.48309	0.182	cg13983307	ZNF510	NM_014930	5'UTR	99539795	99539918	NC_000009.11
cg14856679	1.42e-05	9.03e-08	6.34	7.48246	0.271	cg14856679	C22orf46;NHP2L1	NM_001142964;NM_001003796	TSS1500;TSS1500	42086191	42086314	NC_000022.10
cg19338524	1.42e-05	9.04e-08	6.34	7.48144	0.0868	cg19338524				1397053	1397176	NC_000004.11
cg15826810	1.42e-05	9.04e-08	6.34	7.48095	0.247	cg15826810	LOC285419	NR_027105	TSS1500	124572578	124572701	NC_000004.11
cg23013977	1.42e-05	9.06e-08	6.33	7.47882	0.204	cg23013977	CLIP3	NM_015526	Body	36523056	36523179	NC_000019.9
cg23619365	1.42e-05	9.06e-08	6.33	7.47869	0.318	cg23619365				112712009	112712132	NC_000013.10
cg22979546	1.42e-05	9.06e-08	6.33	7.47852	0.0549	cg22979546	HERC2	NM_004667	Body	28389947	28390070	NC_000015.9
cg18090331	1.42e-05	9.08e-08	6.33	7.4767	0.194	cg18090331	SEPT8;SEPT8;SEPT8;SEPT8	NM_001098812;NM_001098813;NM_001098811;NM_015146	Body;5'UTR;Body;Body	132111426	132111549	NC_000005.9
cg05346295	1.42e-05	9.08e-08	6.33	7.47645	0.0833	cg05346295	NUP62;NUP62;IL4I1;NUP62;NUP62	NM_012346;NM_016553;NM_172374;NM_153719;NM_153718	Body;Body;5'UTR;Body;Body	50412852	50412975	NC_000019.9
cg00989904	1.42e-05	9.1e-08	6.33	7.47505	0.212	cg00989904	STAG1	NM_005862	Body	136340367	136340490	NC_000003.11
cg00664406	1.43e-05	9.14e-08	6.33	7.47044	0.207	cg00664406	GRM2;GRM2	NM_000839;NM_001130063	TSS1500;TSS1500	51740875	51740998	NC_000003.11
cg21856067	1.43e-05	9.16e-08	6.33	7.46814	0.128	cg21856067	MACROD2	NM_080676	TSS1500	13975853	13975976	NC_000020.10
cg14219918	1.43e-05	9.2e-08	6.33	7.46356	0.21	cg14219918	NR5A1	NM_004959	Body	127249562	127249685	NC_000009.11
cg22720790	1.44e-05	9.23e-08	6.33	7.46003	0.335	cg22720790	ZNF274;ZNF274;ZNF274	NM_133502;NM_016325;NM_016324	Body;Body;5'UTR	58716032	58716155	NC_000019.9
cg03012289	1.44e-05	9.23e-08	6.33	7.45997	0.179	cg03012289	PKHD1L1	NM_177531	TSS1500	110374374	110374497	NC_000008.10
cg19678538	1.44e-05	9.24e-08	6.33	7.45971	0.0716	cg19678538	PCDHB14	NM_018934	1stExon	140605042	140605165	NC_000005.9
cg19764555	1.44e-05	9.26e-08	6.33	7.45719	0.125	cg19764555	AHNAK;AHNAK	NM_024060;NM_001620	TSS1500;TSS1500	62315119	62315242	NC_000011.9
cg16277229	1.44e-05	9.26e-08	6.33	7.45681	0.244	cg16277229	PAQR8	NM_133367	Body	52268609	52268732	NC_000006.11
cg15562220	1.44e-05	9.28e-08	6.33	7.45552	0.212	cg15562220	SCGN	NM_006998	TSS200	25652395	25652518	NC_000006.11
cg00087244	1.45e-05	9.32e-08	6.33	7.45051	0.219	cg00087244				74042487	74042610	NC_000007.13
cg04865692	1.45e-05	9.33e-08	6.33	7.45007	0.104	cg04865692	KCNC3	NM_004977	1stExon	50831762	50831885	NC_000019.9
cg10604550	1.45e-05	9.34e-08	6.33	7.44933	0.223	cg10604550				43001210	43001333	NC_000005.9
cg26890189	1.45e-05	9.35e-08	6.33	7.44787	0.111	cg26890189	SLC8A2	NM_015063	Body	47951302	47951425	NC_000019.9
cg17651959	1.45e-05	9.35e-08	6.33	7.44759	0.367	cg17651959				21498100	21498223	NC_000020.10
cg02214783	1.45e-05	9.38e-08	6.32	7.44494	0.207	cg02214783	LOC388588	NM_001163724	TSS1500	3688257	3688380	NC_000001.10
cg00910518	1.45e-05	9.39e-08	6.32	7.44406	0.28	cg00910518				91195213	91195336	NC_000001.10
cg20994097	1.46e-05	9.39e-08	6.32	7.44325	0.228	cg20994097	S100A10	NM_002966	TSS1500	151967992	151968115	NC_000001.10
cg22331349	1.46e-05	9.42e-08	6.32	7.44082	0.146	cg22331349	ZNF577;ZNF577;ZNF577	NR_024181;NM_032679;NM_001135590	TSS200;TSS200;TSS200	52391350	52391473	NC_000019.9
cg04436994	1.46e-05	9.43e-08	6.32	7.43927	0.199	cg04436994	HLX	NM_021958	Body	221055665	221055788	NC_000001.10
cg03409699	1.46e-05	9.43e-08	6.32	7.43885	0.108	cg03409699	PLA2G6;PLA2G6	NM_003560;NM_001004426	Body;Body	38525530	38525653	NC_000022.10
cg20347666	1.46e-05	9.44e-08	6.32	7.43881	0.204	cg20347666	DGKI	NM_004717	Body	137505606	137505729	NC_000007.13
cg25976440	1.46e-05	9.48e-08	6.32	7.43419	0.297	cg25976440				69239481	69239604	NC_000004.11
cg02679503	1.46e-05	9.48e-08	6.32	7.43386	0.214	cg02679503	MTA3	NM_020744	TSS1500	42794680	42794803	NC_000002.11
cg14298200	1.46e-05	9.51e-08	6.32	7.43093	0.244	cg14298200				65498812	65498935	NC_000008.10
cg06951245	1.47e-05	9.53e-08	6.32	7.42855	0.244	cg06951245	PTH2R	NM_005048	Body	209271875	209271998	NC_000002.11
cg21730858	1.47e-05	9.56e-08	6.32	7.42585	0.273	cg21730858	NHSL1;NHSL1	NM_001144060;NM_020464	Body;Body	138806320	138806443	NC_000006.11
cg14644418	1.47e-05	9.56e-08	6.32	7.4255	0.171	cg14644418	FOXI2	NM_207426	Body	129536661	129536784	NC_000010.10
cg00910715	1.48e-05	9.6e-08	6.32	7.42195	0.116	cg00910715				132218639	132218762	NC_000002.11
cg23082635	1.48e-05	9.61e-08	6.32	7.4204	0.23	cg23082635				193991194	193991317	NC_000003.11
cg01161644	1.48e-05	9.64e-08	6.32	7.4175	0.166	cg01161644				28270238	28270361	NC_000016.9
cg17523868	1.48e-05	9.64e-08	6.32	7.41714	0.171	cg17523868	SEZ6;SEZ6	NM_001098635;NM_178860	Body;Body	27313033	27313156	NC_000017.10
cg07150045	1.48e-05	9.65e-08	6.32	7.41681	0.136	cg07150045	KCNH7;KCNH7	NM_173162;NM_033272	TSS1500;TSS1500	163696187	163696310	NC_000002.11
cg12551635	1.48e-05	9.66e-08	6.32	7.41553	0.0587	cg12551635	IFI6;IFI6;IFI6	NM_022872;NM_002038;NM_022873	Body;Body;Body	27994779	27994902	NC_000001.10
cg26518431	1.48e-05	9.69e-08	6.32	7.4128	0.0959	cg26518431	MGC12982;FOXD2	NR_026878;NM_004474	TSS1500;TSS200	47901555	47901678	NC_000001.10
cg00730887	1.49e-05	9.7e-08	6.32	7.41131	0.286	cg00730887				160149604	160149727	NC_000004.11
cg09170553	1.49e-05	9.73e-08	6.31	7.40849	0.0538	cg09170553				298743	298866	NC_000004.11
cg19201009	1.49e-05	9.74e-08	6.31	7.40751	0.188	cg19201009	MARVELD1;MARVELD1;MARVELD1	NR_026753;NM_031484;NM_031484	Body;3'UTR;1stExon	99475406	99475529	NC_000010.10
cg14023999	1.49e-05	9.74e-08	6.31	7.4073	0.267	cg14023999				90543224	90543347	NC_000015.9
cg11293190	1.49e-05	9.77e-08	6.31	7.40468	0.188	cg11293190	PLK5P	NR_026557	TSS1500	1523856	1523979	NC_000019.9
cg11154559	1.49e-05	9.77e-08	6.31	7.40458	0.103	cg11154559				149230782	149230905	NC_000001.10
cg03662545	1.49e-05	9.79e-08	6.31	7.40256	0.238	cg03662545				85254209	85254332	NC_000016.9
cg00688962	1.49e-05	9.79e-08	6.31	7.40237	0.166	cg00688962	KCNIP4	NM_147182	TSS200	21950567	21950690	NC_000004.11
cg12983971	1.5e-05	9.8e-08	6.31	7.40091	0.178	cg12983971	C22orf9	NM_001009880	Body	45634621	45634744	NC_000022.10
cg10173586	1.5e-05	9.82e-08	6.31	7.399	0.191	cg10173586	PLEC1;PLEC1;MIR661;PLEC1;PLEC1	NM_000445;NM_201378;NR_030383;NM_201379;NM_201380	Body;Body;TSS1500;Body;Body	145020593	145020716	NC_000008.10
cg16809534	1.5e-05	9.83e-08	6.31	7.39804	0.185	cg16809534	INSC;INSC	NM_001031853;NM_001042536	Body;Body	15220058	15220181	NC_000011.9
cg01192077	1.5e-05	9.85e-08	6.31	7.39592	0.214	cg01192077	EBF1	NM_024007	Body	158523507	158523630	NC_000005.9
cg08361238	1.5e-05	9.85e-08	6.31	7.39589	0.132	cg08361238	PTGFRN	NM_020440	TSS1500	117452304	117452427	NC_000001.10
cg14712202	1.5e-05	9.86e-08	6.31	7.39485	0.16	cg14712202	DISP1	NM_032890	5'UTR	223104742	223104865	NC_000001.10
cg00785193	1.5e-05	9.87e-08	6.31	7.39426	0.164	cg00785193	CRIM1	NM_016441	TSS1500	36582293	36582416	NC_000002.11
cg04702940	1.5e-05	9.88e-08	6.31	7.39348	0.267	cg04702940	CD248	NM_020404	TSS200	66084599	66084722	NC_000011.9
cg12409149	1.5e-05	9.89e-08	6.31	7.39266	0.2	cg12409149	LOC100270710	NR_026754	TSS1500	99478572	99478695	NC_000010.10
cg15840005	1.51e-05	9.92e-08	6.31	7.3891	0.178	cg15840005	C1orf86	NM_001146310	TSS1500	2139905	2140028	NC_000001.10
cg06579248	1.51e-05	9.93e-08	6.31	7.38873	0.0616	cg06579248	MYO1C;MYO1C;MYO1C	NM_001080779;NM_033375;NM_001080950	Body;Body;Body	1375968	1376091	NC_000017.10
cg02336143	1.51e-05	9.94e-08	6.31	7.38695	0.108	cg02336143	PCDHGB4;PCDHGA4;PCDHGA6;PCDHGA1;PCDHGA5;PCDHGB1;PCDHGA3;PCDHGA2;PCDHGA7;PCDHGB2;PCDHGB4;PCDHGB3	NM_032098;NM_018917;NM_018919;NM_018912;NM_018918;NM_018922;NM_018916;NM_018915;NM_018920;NM_018923;NM_003736;NM_018924	1stExon;Body;Body;Body;Body;Body;Body;Body;Body;Body;1stExon;Body	140769170	140769293	NC_000005.9
cg15209808	1.51e-05	9.95e-08	6.31	7.38675	0.223	cg15209808	HORMAD2	NM_152510	TSS200	30476254	30476377	NC_000022.10
cg05414908	1.51e-05	9.99e-08	6.31	7.38237	0.145	cg05414908	LOC100302652;GPR75	NM_001164165;NM_006794	TSS200;TSS200	54087173	54087296	NC_000002.11
cg02892388	1.51e-05	9.99e-08	6.31	7.382	0.251	cg02892388				155260310	155260433	NC_000007.13
cg04063345	1.52e-05	1e-07	6.31	7.3803	0.273	cg04063345	ESR1;ESR1;ESR1;ESR1	NM_001122740;NM_001122741;NM_000125;NM_001122742	Body;Body;Body;Body	152130058	152130181	NC_000006.11
cg21510348	1.52e-05	1e-07	6.31	7.37848	0.211	cg21510348				72596752	72596875	NC_000005.9
cg13655082	1.52e-05	1e-07	6.31	7.37815	0.228	cg13655082				125109046	125109169	NC_000009.11
cg22538780	1.52e-05	1e-07	6.31	7.37691	0.27	cg22538780	LOC100192378	NR_024360	Body	77585448	77585571	NC_000008.10
cg21238609	1.52e-05	1e-07	6.3	7.37663	0.293	cg21238609	RARA	NM_000964	5'UTR	38472961	38473084	NC_000017.10
cg05388880	1.52e-05	1.01e-07	6.3	7.37488	0.29	cg05388880				183807081	183807204	NC_000004.11
cg19904233	1.52e-05	1.01e-07	6.3	7.37286	0.0486	cg19904233	RGS17	NM_012419	TSS1500	153452791	153452914	NC_000006.11
cg08854987	1.52e-05	1.01e-07	6.3	7.37286	0.148	cg08854987	PCDHGA4;PCDHGA9;PCDHGA1;PCDHGB1;PCDHGB6;PCDHGB6;PCDHGB3;PCDHGA6;PCDHGA8;PCDHGA5;PCDHGB4;PCDHGA3;PCDHGA2;PCDHGB2;PCDHGA7;PCDHGB5	NM_018917;NM_018921;NM_018912;NM_018922;NM_032100;NM_018926;NM_018924;NM_018919;NM_032088;NM_018918;NM_003736;NM_018916;NM_018915;NM_018923;NM_018920;NM_018925	Body;Body;Body;Body;1stExon;1stExon;Body;Body;Body;Body;Body;Body;Body;Body;Body;Body	140789708	140789831	NC_000005.9
cg14266611	1.52e-05	1.01e-07	6.3	7.37273	0.182	cg14266611	MLLT3	NM_004529	Body	20478423	20478546	NC_000009.11
cg16182267	1.52e-05	1.01e-07	6.3	7.37257	0.202	cg16182267	NFATC1;NFATC1;NFATC1;NFATC1	NM_006162;NM_172388;NM_172389;NM_172387	Body;Body;Body;Body	77286129	77286252	NC_000018.9
cg09720117	1.52e-05	1.01e-07	6.3	7.37154	0.158	cg09720117	KCNA5	NM_002234	TSS1500	5152546	5152669	NC_000012.11
cg23286295	1.53e-05	1.01e-07	6.3	7.36958	0.126	cg23286295	LIG1	NM_000234	TSS1500	48674931	48675054	NC_000019.9
cg12336960	1.53e-05	1.01e-07	6.3	7.36742	0.234	cg12336960	CCDC50;CCDC50;UTS2D	NM_178335;NM_174908;NM_198152	Body;Body;TSS1500	191049285	191049408	NC_000003.11
cg18058747	1.53e-05	1.02e-07	6.3	7.36453	0.276	cg18058747	BHMT	NM_001713	Body	78408253	78408376	NC_000005.9
cg14077898	1.53e-05	1.02e-07	6.3	7.3636	0.241	cg14077898	SLC17A8;SLC17A8	NM_001145288;NM_139319	TSS200;TSS200	100750695	100750818	NC_000012.11
cg18103394	1.53e-05	1.02e-07	6.3	7.36326	0.185	cg18103394	SYN1;SYN1	NM_006950;NM_133499	Body;Body	47433374	47433497	NC_000023.10
cg26961332	1.53e-05	1.02e-07	6.3	7.36317	0.0597	cg26961332	LSM4	NM_012321	Body	18420631	18420754	NC_000019.9
cg26724070	1.53e-05	1.02e-07	6.3	7.36107	0.131	cg26724070	SNX20;SNX20;SNX20	NM_153337;NM_001144972;NM_182854	Body;Body;Body	50707467	50707590	NC_000016.9
cg12390344	1.54e-05	1.02e-07	6.3	7.35876	0.239	cg12390344	LAMA3;LAMA3	NM_198129;NM_001127717	Body;Body	21270348	21270471	NC_000018.9
cg06966811	1.54e-05	1.02e-07	6.3	7.35735	0.246	cg06966811	OTX2	NM_021728	5'UTR	57276789	57276912	NC_000014.8
cg09267427	1.54e-05	1.03e-07	6.3	7.35433	0.249	cg09267427	NCOR2;NCOR2	NM_006312;NM_001077261	Body;Body	124953924	124954047	NC_000012.11
cg16648137	1.54e-05	1.03e-07	6.3	7.35199	0.228	cg16648137	GOT1L1	NM_152413	TSS1500	37798156	37798279	NC_000008.10
cg15084543	1.54e-05	1.03e-07	6.3	7.35155	0.34	cg15084543	ELTD1;ELTD1	NM_022159;NM_022159	5'UTR;1stExon	79472408	79472531	NC_000001.10
cg01915791	1.54e-05	1.03e-07	6.3	7.34989	0.205	cg01915791	HSPB6	NM_144617	Body	36247526	36247649	NC_000019.9
cg25725843	1.54e-05	1.03e-07	6.3	7.34986	0.178	cg25725843	ST6GAL2;ST6GAL2	NM_001142352;NM_032528	TSS1500;TSS1500	107504169	107504292	NC_000002.11
cg18194945	1.54e-05	1.03e-07	6.3	7.34984	0.216	cg18194945	SHOX2;SHOX2;SHOX2	NM_001163678;NM_006884;NM_003030	Body;Body;Body	157820591	157820714	NC_000003.11
cg16026922	1.55e-05	1.04e-07	6.3	7.34384	0.211	cg16026922	UCHL1	NM_004181	Body	41259044	41259167	NC_000004.11
cg02927618	1.55e-05	1.04e-07	6.3	7.34348	0.196	cg02927618	ANKRD13A	NM_033121	Body	110440527	110440650	NC_000012.11
cg09074113	1.55e-05	1.04e-07	6.29	7.34142	0.185	cg09074113	GDF7	NM_182828	Body	20870087	20870210	NC_000002.11
cg10659886	1.55e-05	1.04e-07	6.29	7.34093	0.212	cg10659886	ZSCAN18;ZSCAN18	NR_027135;NM_001145542	Body;1stExon	58629719	58629842	NC_000019.9
cg16137498	1.55e-05	1.04e-07	6.29	7.34076	0.199	cg16137498				101286541	101286664	NC_000010.10
cg11917755	1.55e-05	1.04e-07	6.29	7.34024	0.0833	cg11917755				43102605	43102728	NC_000008.10
cg22908616	1.55e-05	1.04e-07	6.29	7.34021	0.183	cg22908616	DNHD1;DNHD1	NM_173589;NM_144666	5'UTR;5'UTR	6518577	6518700	NC_000011.9
cg24399349	1.56e-05	1.05e-07	6.29	7.33588	0.179	cg24399349				55517045	55517168	NC_000007.13
cg08548396	1.56e-05	1.05e-07	6.29	7.33231	0.326	cg08548396				30095549	30095672	NC_000006.11
cg12446447	1.56e-05	1.05e-07	6.29	7.33135	0.0652	cg12446447	PARK7;PARK7	NM_007262;NM_001123377	Body;Body	8044581	8044704	NC_000001.10
cg04920032	1.56e-05	1.05e-07	6.29	7.32928	0.184	cg04920032	FAIM2	NM_012306	3'UTR	50262986	50263109	NC_000012.11
cg00921266	1.57e-05	1.06e-07	6.29	7.32709	0.305	cg00921266	HOXA3;HOXA3;HOXA3	NM_153631;NM_030661;NM_153632	5'UTR;5'UTR;TSS200	27153663	27153786	NC_000007.13
cg10055566	1.57e-05	1.06e-07	6.29	7.32353	0.2	cg10055566	NKAPL	NM_001007531	1stExon	28227220	28227343	NC_000006.11
cg18280057	1.57e-05	1.06e-07	6.29	7.32285	0.2	cg18280057	MTSS1	NM_014751	TSS1500	125741158	125741281	NC_000008.10
cg11511175	1.58e-05	1.07e-07	6.29	7.31886	0.169	cg11511175	AGAP2;LOC100130776;AGAP2	NM_014770;NR_027032;NM_001122772	3'UTR;TSS200;3'UTR	58119979	58120102	NC_000012.11
cg04232282	1.58e-05	1.07e-07	6.29	7.31789	0.272	cg04232282				14107433	14107556	NC_000016.9
cg13779868	1.58e-05	1.07e-07	6.29	7.31706	0.202	cg13779868	NET1;NET1	NM_001047160;NM_005863	Body;TSS200	5488436	5488559	NC_000010.10
cg05024939	1.58e-05	1.07e-07	6.29	7.31462	0.223	cg05024939				113442251	113442374	NC_000004.11
cg27050153	1.58e-05	1.07e-07	6.29	7.31392	0.194	cg27050153				102030110	102030233	NC_000014.8
cg03237606	1.58e-05	1.07e-07	6.29	7.31316	0.205	cg03237606	TMEM26	NM_178505	Body	63212265	63212388	NC_000010.10
cg07547549	1.59e-05	1.08e-07	6.28	7.30429	0.17	cg07547549	SLC12A5;SLC12A5	NM_020708;NM_001134771	Body;Body	44658225	44658348	NC_000020.10
cg10686304	1.6e-05	1.08e-07	6.28	7.30252	0.137	cg10686304				22561205	22561328	NC_000008.10
cg18628732	1.6e-05	1.09e-07	6.28	7.29967	0.207	cg18628732				30095295	30095418	NC_000006.11
cg11623476	1.6e-05	1.09e-07	6.28	7.29767	0.144	cg11623476	LFNG;LFNG;LFNG;LFNG	NM_001166355;NM_001040167;NM_001040168;NM_002304	Body;Body;Body;Body	2566027	2566150	NC_000007.13
cg00366531	1.61e-05	1.09e-07	6.28	7.29334	0.148	cg00366531				130970940	130971063	NC_000002.11
cg26713570	1.61e-05	1.09e-07	6.28	7.29194	0.0845	cg26713570	HIST1H1A	NM_005325	TSS1500	26018602	26018725	NC_000006.11
cg07953015	1.61e-05	1.1e-07	6.28	7.2895	0.339	cg07953015	SEPW1	NM_003009	3'UTR	48285322	48285445	NC_000019.9
cg26111265	1.61e-05	1.1e-07	6.28	7.28619	0.0809	cg26111265	IGSF3;IGSF3	NM_001542;NM_001007237	TSS1500;TSS1500	117210620	117210743	NC_000001.10
cg05523897	1.61e-05	1.1e-07	6.28	7.28562	0.212	cg05523897	C1orf86	NM_001146310	TSS200	2139175	2139298	NC_000001.10
cg21467371	1.61e-05	1.1e-07	6.28	7.28497	0.169	cg21467371	ARL16	NM_001040025	3'UTR	79648722	79648845	NC_000017.10
cg22980156	1.61e-05	1.1e-07	6.28	7.28483	0.263	cg22980156	CDRT4	NM_173622	5'UTR	15366916	15367039	NC_000017.10
cg22260478	1.61e-05	1.1e-07	6.28	7.2848	0.187	cg22260478	CTGF	NM_001901	TSS1500	132272790	132272913	NC_000006.11
cg06875179	1.61e-05	1.1e-07	6.28	7.28411	0.124	cg06875179	SKI	NM_003036	Body	2238045	2238168	NC_000001.10
cg01619929	1.62e-05	1.11e-07	6.28	7.28254	0.242	cg01619929				36806443	36806566	NC_000022.10
cg18786782	1.62e-05	1.11e-07	6.28	7.28093	0.203	cg18786782				13936527	13936650	NC_000003.11
cg14374337	1.62e-05	1.11e-07	6.28	7.27616	0.183	cg14374337				75446498	75446621	NC_000014.8
cg05940514	1.62e-05	1.11e-07	6.28	7.27587	0.203	cg05940514				39791696	39791819	NC_000017.10
cg23475021	1.63e-05	1.12e-07	6.27	7.2735	0.22	cg23475021	ZNF395	NM_018660	5'UTR	28241186	28241309	NC_000008.10
cg09820150	1.63e-05	1.12e-07	6.27	7.2711	0.237	cg09820150				87985219	87985342	NC_000005.9
cg18397073	1.63e-05	1.12e-07	6.27	7.27098	0.267	cg18397073	POU2F2	NM_002698	Body	42600278	42600401	NC_000019.9
cg14780466	1.63e-05	1.12e-07	6.27	7.26877	0.23	cg14780466	GDF7	NM_182828	Body	20870812	20870935	NC_000002.11
cg03300268	1.63e-05	1.12e-07	6.27	7.26771	0.0932	cg03300268	DEXI;DEXI	NM_014015;NM_014015	5'UTR;1stExon	11035972	11036095	NC_000016.9
cg02317313	1.63e-05	1.12e-07	6.27	7.2676	0.215	cg02317313	LOC338799	NR_002809	Body	122235206	122235329	NC_000012.11
cg12999366	1.63e-05	1.12e-07	6.27	7.26663	0.305	cg12999366	NOD1	NM_006092	5'UTR	30499283	30499406	NC_000007.13
cg17670191	1.63e-05	1.12e-07	6.27	7.26637	0.138	cg17670191	ESPNP	NR_026567	Body	17026406	17026529	NC_000001.10
cg09071889	1.63e-05	1.12e-07	6.27	7.26629	0.255	cg09071889	STMN2;STMN2	NM_007029;NM_007029	5'UTR;1stExon	80523413	80523536	NC_000008.10
cg24922090	1.63e-05	1.13e-07	6.27	7.26504	0.124	cg24922090	PCDHGA4;PCDHGB3;PCDHGA1;PCDHGA5;PCDHGB1;PCDHGA3;PCDHGB3;PCDHGA2;PCDHGB2	NM_018917;NM_018924;NM_018912;NM_018918;NM_018922;NM_018916;NM_032097;NM_018915;NM_018923	Body;1stExon;Body;Body;Body;Body;1stExon;Body;Body	140751608	140751731	NC_000005.9
cg05301866	1.63e-05	1.13e-07	6.27	7.26389	0.179	cg05301866	TBR1	NM_006593	Body	162279964	162280087	NC_000002.11
cg19006947	1.64e-05	1.13e-07	6.27	7.25794	0.122	cg19006947	PLCB3	NM_000932	Body	64034861	64034984	NC_000011.9
cg25657261	1.64e-05	1.13e-07	6.27	7.25731	0.11	cg25657261	PCDHGA2;PCDHGA3;PCDHGA3;PCDHGA1	NM_018915;NM_018916;NM_032011;NM_018912	Body;1stExon;1stExon;Body	140723858	140723981	NC_000005.9
cg21469772	1.65e-05	1.14e-07	6.27	7.25581	0.197	cg21469772	LHX6;LHX6	NM_199160;NM_014368	Body;Body	124989294	124989417	NC_000009.11
cg26641076	1.65e-05	1.14e-07	6.27	7.25486	0.22	cg26641076				74208602	74208725	NC_000002.11
cg00088183	1.65e-05	1.14e-07	6.27	7.25395	0.274	cg00088183				91185168	91185291	NC_000001.10
cg12635937	1.65e-05	1.14e-07	6.27	7.25297	0.156	cg12635937				81184925	81185048	NC_000004.11
cg05400732	1.65e-05	1.14e-07	6.27	7.25254	0.235	cg05400732	ARHGEF3	NM_001128615	Body	57032141	57032264	NC_000003.11
cg08379738	1.65e-05	1.14e-07	6.27	7.25119	0.235	cg08379738	DENND1C	NM_024898	Body	6477033	6477156	NC_000019.9
cg11777870	1.65e-05	1.14e-07	6.27	7.25067	0.159	cg11777870	FRMD6;FRMD6	NM_152330;NM_001042481	Body;Body	52191937	52192060	NC_000014.8
cg13673363	1.65e-05	1.14e-07	6.27	7.24904	0.178	cg13673363	DNM1;DNM1	NM_004408;NM_001005336	Body;Body	130997032	130997155	NC_000009.11
cg27063986	1.65e-05	1.14e-07	6.27	7.24846	0.234	cg27063986	NDST4	NM_022569	TSS1500	116035232	116035355	NC_000004.11
cg15959252	1.66e-05	1.15e-07	6.27	7.24366	0.306	cg15959252	C12orf68;C12orf68	NM_001013635;NM_001013635	3'UTR;1stExon	48578724	48578847	NC_000012.11
cg09554951	1.66e-05	1.15e-07	6.27	7.24239	0.268	cg09554951	KCNQ1DN	NR_024627	TSS1500	2890725	2890848	NC_000011.9
cg22886575	1.66e-05	1.15e-07	6.27	7.24092	0.191	cg22886575	HMX2	NM_005519	3'UTR	124910040	124910163	NC_000010.10
cg26557693	1.67e-05	1.16e-07	6.26	7.2389	0.21	cg26557693				27265159	27265282	NC_000007.13
cg13375463	1.67e-05	1.16e-07	6.26	7.23789	0.177	cg13375463	AHDC1	NM_001029882	5'UTR	27899025	27899148	NC_000001.10
cg19570321	1.67e-05	1.16e-07	6.26	7.23695	0.183	cg19570321	HRASLS5;HRASLS5;HRASLS5	NM_001146728;NM_054108;NM_001146729	Body;Body;Body	63258214	63258337	NC_000011.9
cg16214693	1.67e-05	1.16e-07	6.26	7.2368	0.198	cg16214693	LHPP;LHPP	NM_022126;NM_001167880	Body;Body	126278299	126278422	NC_000010.10
cg22132788	1.67e-05	1.16e-07	6.26	7.23463	0.221	cg22132788	MYO1G	NM_033054	Body	45002486	45002609	NC_000007.13
cg02979520	1.67e-05	1.16e-07	6.26	7.23415	0.134	cg02979520	PLXNB1;PLXNB1	NM_002673;NM_001130082	TSS1500;TSS200	48471575	48471698	NC_000003.11
cg11232245	1.67e-05	1.16e-07	6.26	7.23204	0.245	cg11232245				101284535	101284658	NC_000010.10
cg09147985	1.67e-05	1.16e-07	6.26	7.23127	0.148	cg09147985	LRRC4C;LRRC4C	NM_020929;NM_020929	5'UTR;1stExon	40314618	40314741	NC_000011.9
cg06087185	1.67e-05	1.17e-07	6.26	7.23059	0.342	cg06087185				29521499	29521622	NC_000006.11
cg03091776	1.67e-05	1.17e-07	6.26	7.2297	0.0746	cg03091776	CXCL1	NM_001511	Body	74735468	74735591	NC_000004.11
cg24275315	1.68e-05	1.17e-07	6.26	7.22558	0.209	cg24275315	NKX6-1	NM_006168	Body	85417312	85417435	NC_000004.11
cg04173852	1.68e-05	1.17e-07	6.26	7.22506	0.153	cg04173852	ARSG	NM_014960	5'UTR	66292375	66292498	NC_000017.10
cg15638709	1.68e-05	1.17e-07	6.26	7.2241	0.202	cg15638709				110226387	110226510	NC_000010.10
cg16652462	1.68e-05	1.17e-07	6.26	7.22339	0.22	cg16652462	LOC644172	NR_026901	Body	43679667	43679790	NC_000017.10
cg01035261	1.68e-05	1.17e-07	6.26	7.22259	0.303	cg01035261	CNGB1	NM_001297	Body	57918095	57918218	NC_000016.9
cg24835159	1.68e-05	1.17e-07	6.26	7.22239	0.265	cg24835159	RNF43;RNF43	NM_017763;NM_017763	5'UTR;1stExon	56494554	56494677	NC_000017.10
cg03152500	1.68e-05	1.18e-07	6.26	7.21983	0.213	cg03152500	PROCR	NM_006404	Body	33762673	33762796	NC_000020.10
cg07298299	1.69e-05	1.18e-07	6.26	7.21915	0.191	cg07298299	GYLTL1B;GYLTL1B	NM_152312;NM_152312	1stExon;5'UTR	45943237	45943360	NC_000011.9
cg23845574	1.69e-05	1.18e-07	6.26	7.21793	0.13	cg23845574	VENTX	NM_014468	TSS200	135051270	135051393	NC_000010.10
cg17077180	1.69e-05	1.18e-07	6.26	7.21502	0.186	cg17077180				38461687	38461810	NC_000001.10
cg02676262	1.69e-05	1.19e-07	6.26	7.21361	0.201	cg02676262	INPP5A	NM_005539	Body	134527606	134527729	NC_000010.10
cg02092102	1.69e-05	1.19e-07	6.26	7.21102	0.208	cg02092102				128555896	128556019	NC_000007.13
cg24075175	1.7e-05	1.19e-07	6.26	7.21038	0.225	cg24075175				128560240	128560363	NC_000011.9
cg15077193	1.7e-05	1.19e-07	6.26	7.20857	0.326	cg15077193	PTBP1;PTBP1;PTBP1;PTBP1	NM_031990;NM_175847;NM_031991;NM_002819	Body;Body;Body;Body	802989	803112	NC_000019.9
cg26315277	1.7e-05	1.19e-07	6.26	7.20669	0.222	cg26315277	PAX6	NM_001127612	TSS200	31839549	31839672	NC_000011.9
cg04263215	1.7e-05	1.2e-07	6.25	7.2051	0.254	cg04263215	NDUFS2;ADAMTS4	NM_004550;NM_005099	TSS1500;TSS200	161168856	161168979	NC_000001.10
cg27262717	1.7e-05	1.2e-07	6.25	7.20464	0.24	cg27262717	TNNC2	NM_003279	Body	44452633	44452756	NC_000020.10
cg09645574	1.7e-05	1.2e-07	6.25	7.20365	0.251	cg09645574				42879382	42879505	NC_000006.11
cg08068240	1.7e-05	1.2e-07	6.25	7.20224	0.0659	cg08068240	LUZP2	NM_001009909	TSS200	24518367	24518490	NC_000011.9
cg02461363	1.72e-05	1.21e-07	6.25	7.19356	0.184	cg02461363	TMEM26	NM_178505	Body	63212496	63212619	NC_000010.10
cg02149189	1.72e-05	1.21e-07	6.25	7.19291	0.32	cg02149189				29521138	29521261	NC_000006.11
cg21890667	1.72e-05	1.21e-07	6.25	7.19267	0.187	cg21890667	HORMAD2	NM_152510	TSS1500	30476089	30476212	NC_000022.10
cg02616604	1.72e-05	1.21e-07	6.25	7.19263	0.107	cg02616604	SYT15;SYT15	NM_181519;NM_031912	TSS1500;TSS1500	46971347	46971470	NC_000010.10
cg19526659	1.72e-05	1.21e-07	6.25	7.19063	0.105	cg19526659				57154862	57154985	NC_000019.9
cg05621843	1.72e-05	1.22e-07	6.25	7.18907	0.144	cg05621843	C9orf3	NM_032823	Body	97806397	97806520	NC_000009.11
cg08643131	1.72e-05	1.22e-07	6.25	7.18718	0.189	cg08643131	MUM1;MUM1	NR_024247;NM_032853	TSS200;5'UTR	1356150	1356273	NC_000019.9
cg11736940	1.72e-05	1.22e-07	6.25	7.18667	0.167	cg11736940	PKLR;PKLR	NM_000298;NM_181871	Body;Body	155265026	155265149	NC_000001.10
cg18204017	1.72e-05	1.22e-07	6.25	7.18602	0.0975	cg18204017	PPARD;PPARD	NM_177435;NM_006238	TSS1500;TSS1500	35309928	35310051	NC_000006.11
cg11624708	1.72e-05	1.22e-07	6.25	7.18531	0.283	cg11624708	JAK3	NM_000215	Body	17942411	17942534	NC_000019.9
cg23288807	1.73e-05	1.22e-07	6.25	7.18124	0.191	cg23288807				128559399	128559522	NC_000011.9
cg24305156	1.73e-05	1.23e-07	6.25	7.18107	0.19	cg24305156	CRY2;CRY2	NM_001127457;NM_021117	Body;Body	45871936	45872059	NC_000011.9
cg05077231	1.74e-05	1.23e-07	6.25	7.17331	0.183	cg05077231	MLNR	NM_001507	TSS1500	49793054	49793177	NC_000013.10
cg20987938	1.74e-05	1.24e-07	6.25	7.1729	0.261	cg20987938				155244149	155244272	NC_000007.13
cg09074223	1.74e-05	1.24e-07	6.25	7.17193	0.229	cg09074223				210466472	210466595	NC_000001.10
cg21775245	1.74e-05	1.24e-07	6.24	7.1707	0.277	cg21775245	TMCC1;TMCC1;TMCC1	NM_015008;NM_001017395;NM_001128224	TSS200;Body;Body	129407548	129407671	NC_000003.11
cg02898293	1.74e-05	1.24e-07	6.24	7.17022	0.182	cg02898293	VSX1;VSX1	NM_014588;NM_199425	Body;Body	25061762	25061885	NC_000020.10
cg26405475	1.74e-05	1.24e-07	6.24	7.16899	0.259	cg26405475				156324038	156324161	NC_000003.11
cg10357060	1.75e-05	1.24e-07	6.24	7.16523	0.196	cg10357060	DPYSL5	NM_020134	Body	27124343	27124466	NC_000002.11
cg19592277	1.75e-05	1.25e-07	6.24	7.16358	0.211	cg19592277	GPR75;LOC100302652	NM_006794;NM_001164165	5'UTR;Body	54086854	54086977	NC_000002.11
cg05745631	1.75e-05	1.25e-07	6.24	7.16232	0.27	cg05745631				30095178	30095301	NC_000006.11
cg22336337	1.75e-05	1.25e-07	6.24	7.16081	0.252	cg22336337	ST18	NM_014682	5'UTR	53161949	53162072	NC_000008.10
cg20444604	1.75e-05	1.25e-07	6.24	7.15976	0.135	cg20444604	HLA-E	NM_005516	Body	30457552	30457675	NC_000006.11
cg03714522	1.75e-05	1.25e-07	6.24	7.15911	0.195	cg03714522	AGAP3	NM_031946	Body	150822902	150823025	NC_000007.13
cg10300188	1.76e-05	1.26e-07	6.24	7.1542	0.125	cg10300188	KCNQ1DN	NR_024627	TSS1500	2890577	2890700	NC_000011.9
cg11746851	1.76e-05	1.26e-07	6.24	7.15399	0.1	cg11746851				129988279	129988402	NC_000009.11
cg12057563	1.76e-05	1.26e-07	6.24	7.15312	0.287	cg12057563	FHL1;FHL1;FHL1;FHL1;FHL1;FHL1	NR_027621;NM_001449;NM_001159703;NM_001159702;NM_001159700;NM_001159700	Body;5'UTR;5'UTR;5'UTR;1stExon;5'UTR	135230841	135230964	NC_000023.10
cg15312264	1.77e-05	1.27e-07	6.24	7.14912	0.241	cg15312264	TBPL2	NM_199047	TSS200	55907299	55907422	NC_000014.8
cg01914621	1.77e-05	1.27e-07	6.24	7.14895	0.23	cg01914621				155260474	155260597	NC_000007.13
cg17270843	1.77e-05	1.27e-07	6.24	7.14722	0.0802	cg17270843	FRAT1;FRAT1	NM_005479;NM_005479	1stExon;5'UTR	99079074	99079197	NC_000010.10
cg25901381	1.77e-05	1.27e-07	6.24	7.14605	0.172	cg25901381	HOXA11AS;HOXA11	NR_002795;NM_005523	Body;TSS1500	27225485	27225608	NC_000007.13
cg05513455	1.77e-05	1.27e-07	6.24	7.14432	0.182	cg05513455				105388269	105388392	NC_000006.11
cg23606718	1.78e-05	1.28e-07	6.24	7.14138	0.128	cg23606718	FAM123C;FAM123C;FAM123C;FAM123C;FAM123C;FAM123C	NM_152698;NM_001105194;NM_001105195;NM_001105194;NM_001105193;NM_001105195	5'UTR;5'UTR;1stExon;1stExon;5'UTR;5'UTR	131513927	131514050	NC_000002.11
cg09432775	1.78e-05	1.28e-07	6.24	7.1406	0.17	cg09432775	SBNO2;SBNO2	NM_001100122;NM_014963	Body;Body	1117453	1117576	NC_000019.9
cg24296765	1.78e-05	1.28e-07	6.24	7.14049	0.198	cg24296765	NSUN7	NM_024677	Body	40752895	40753018	NC_000004.11
cg00788028	1.78e-05	1.28e-07	6.24	7.13945	0.216	cg00788028	LOC440839	NR_029399	Body	114049041	114049164	NC_000002.11
cg05434287	1.78e-05	1.28e-07	6.24	7.13934	0.204	cg05434287	MAD1L1;MAD1L1;MAD1L1	NM_003550;NM_001013837;NM_001013836	Body;Body;Body	2030229	2030352	NC_000007.13
cg11862551	1.78e-05	1.28e-07	6.23	7.13605	0.26	cg11862551				29817963	29818086	NC_000006.11
cg18120446	1.79e-05	1.29e-07	6.23	7.13257	0.239	cg18120446				13531076	13531199	NC_000004.11
cg10433052	1.79e-05	1.29e-07	6.23	7.13147	0.182	cg10433052	DHDDS;DHDDS	NM_024887;NM_205861	Body;Body	26795536	26795659	NC_000001.10
cg04259752	1.79e-05	1.29e-07	6.23	7.13109	0.154	cg04259752	LOXL2	NM_002318	TSS1500	23262159	23262282	NC_000008.10
cg00735611	1.79e-05	1.29e-07	6.23	7.13022	0.201	cg00735611	GRB7;GRB7	NM_005310;NM_001030002	5'UTR;5'UTR	37895886	37896009	NC_000017.10
cg19356389	1.79e-05	1.29e-07	6.23	7.13005	0.155	cg19356389	RING1;MIR219-1	NM_002931;NR_029633	TSS1500;TSS1500	33175140	33175263	NC_000006.11
cg10196558	1.79e-05	1.29e-07	6.23	7.12883	0.156	cg10196558				155043921	155044044	NC_000001.10
cg03554552	1.79e-05	1.29e-07	6.23	7.12858	0.175	cg03554552	CD3EAP;PPP1R13L;PPP1R13L	NM_012099;NM_001142502;NM_006663	TSS1500;5'UTR;5'UTR	45908146	45908269	NC_000019.9
cg13271643	1.79e-05	1.3e-07	6.23	7.12594	0.287	cg13271643	CRYL1	NM_015974	Body	21036583	21036706	NC_000013.10
cg16165165	1.79e-05	1.3e-07	6.23	7.12545	0.238	cg16165165				54624373	54624496	NC_000010.10
cg04221877	1.8e-05	1.3e-07	6.23	7.12448	0.152	cg04221877	RUNX3;RUNX3	NM_004350;NM_001031680	TSS1500;Body	25257515	25257638	NC_000001.10
cg21133153	1.8e-05	1.3e-07	6.23	7.12343	0.301	cg21133153				29521488	29521611	NC_000006.11
cg18951537	1.8e-05	1.3e-07	6.23	7.12331	0.152	cg18951537	MAP2K4	NM_003010	Body	11950516	11950639	NC_000017.10
cg06599594	1.8e-05	1.3e-07	6.23	7.12169	0.205	cg06599594	ZDHHC23	NM_173570	Body	113667740	113667863	NC_000003.11
cg17408527	1.8e-05	1.3e-07	6.23	7.12164	0.17	cg17408527	ZSCAN18;ZSCAN18	NR_027135;NM_001145542	TSS200;TSS200	58629967	58630090	NC_000019.9
cg10101600	1.81e-05	1.31e-07	6.23	7.1167	0.167	cg10101600	THADA;THADA	NM_022065;NM_001083953	Body;Body	43478743	43478866	NC_000002.11
cg05730368	1.81e-05	1.31e-07	6.23	7.11571	0.185	cg05730368	GUCA1A	NM_000409	Body	42146052	42146175	NC_000006.11
cg15820574	1.81e-05	1.31e-07	6.23	7.11144	0.248	cg15820574				156406711	156406834	NC_000001.10
cg05199362	1.82e-05	1.32e-07	6.23	7.10819	0.0994	cg05199362	DUSP15;DUSP15;DUSP15	NM_001012644;NM_080611;NM_177991	Body;Body;Body	30450060	30450183	NC_000020.10
cg11053632	1.82e-05	1.33e-07	6.22	7.1022	0.197	cg11053632	BANP;BANP	NM_017869;NM_079837	Body;Body	88053094	88053217	NC_000016.9
cg10137010	1.82e-05	1.33e-07	6.22	7.10173	0.139	cg10137010	TRPV3	NM_145068	TSS1500	3462438	3462561	NC_000017.10
cg20150640	1.83e-05	1.34e-07	6.22	7.09516	0.223	cg20150640	C1orf213;C1orf213;C1orf213;ZNF436	NM_138479;NM_001008896;NM_138479;NM_001077195	3'UTR;Body;1stExon;TSS1500	23697656	23697779	NC_000001.10
[truncated: 58,331 more rows]
