# Supplementary material for: Identification of differentially expressed methylated genes in melanoma versus nevi using bioinformatics methods
Source: PeerJ. 2020 Jun 3;8:e9273. doi: 10.7717/peerj.9273 (PMC7275674; doi:10.7717/peerj.9273)
Supplement: Supplemental Information 8 [file peerj-08-9273-s008.xlsx]

## Sheet: Sheet1
ID	adj.P.Val	P.Value	t	B	logFC	Name	UCSC_RefGene_Name	UCSC_RefGene_Accession	RANGE_START	RANGE_END	RANGE_GB	SPOT_ID
cg08729434	7.13e-35	4.4e-40	-17.834	80.4233	-0.232	cg08729434			133023100	133023223	NC_000002.11
cg01725474	1.6e-33	1.97e-38	-17.2087	76.6847	-0.202	cg01725474			33959409	33959532	NC_000016.9
cg00159780	3.96e-33	8.16e-38	-17.0405	75.2814	-0.209	cg00159780	REXO1L2P;REXO1L1	NR_003594;NM_172239	86574469	86574592	NC_000008.10
cg20899329	1.89e-32	4.66e-37	-16.6934	73.5719	-0.353	cg20899329	PTPRN2;PTPRN2;PTPRN2	NM_002847;NM_130842;NM_130843	157410194	157410317	NC_000007.13
cg25384595	3.86e-32	1.07e-36	-16.5594	72.7578	-0.279	cg25384595	LILRA1;LILRA1	NM_006863;NM_006863	55105156	55105279	NC_000019.9
cg26879116	8.09e-32	2.5e-36	-16.4216	71.9182	-0.249	cg26879116			88845496	88845619	NC_000004.11
cg22388316	8.88e-32	2.92e-36	-16.3962	71.7639	-0.292	cg22388316	MYT1L	NM_015025	2000192	2000315	NC_000002.11
cg09374462	1.55e-31	5.43e-36	-16.2965	71.1548	-0.19	cg09374462			49314051	49314174	NC_000004.11
cg16942223	4.18e-31	1.81e-35	-16.1029	69.9702	-0.327	cg16942223	JAKMIP1	NM_001099433	6050460	6050583	NC_000004.11
ch.10.2770541R	5.35e-31	2.42e-35	-16.0558	69.6819	-0.276	ch.10.2770541R	FAM196A;DOCK1	NM_001039762;NM_001380	128990022	128990145	NC_000010.10
cg08637514	1.77e-30	1.01e-34	-15.8264	68.2722	-0.302	cg08637514	GIMAP7	NM_153236	150212707	150212830	NC_000007.13
cg18191540	1.77e-30	1.02e-34	-15.8256	68.2676	-0.274	cg18191540			107281437	107281560	NC_000014.8
cg06299783	2.86e-30	1.77e-34	-15.7374	67.7242	-0.123	cg06299783			133872222	133872345	NC_000011.9
cg00946921	5.45e-30	3.81e-34	-15.6145	66.9667	-0.303	cg00946921			106025021	106025144	NC_000014.8
cg20189761	6.53e-30	4.85e-34	-15.5763	66.7306	-0.172	cg20189761	REXO1L2P;REXO1L1	NR_003594;NM_172239	86574449	86574572	NC_000008.10
cg02166383	8.96e-30	7.59e-34	-15.5047	66.2883	-0.227	cg02166383			107252649	107252772	NC_000014.8
cg23095732	9.2e-30	8.15e-34	-15.4935	66.2189	-0.123	cg23095732			193758746	193758869	NC_000002.11
cg08190125	1.83e-29	1.7e-33	-15.3763	65.4939	-0.304	cg08190125			106145435	106145558	NC_000014.8
cg21052788	3.58e-29	3.69e-33	-15.2533	64.7315	-0.211	cg21052788	PTPRN2;PTPRN2;PTPRN2	NM_002847;NM_130842;NM_130843	157385231	157385354	NC_000007.13
cg04947339	3.97e-29	4.17e-33	-15.2335	64.6088	-0.314	cg04947339			106214343	106214466	NC_000014.8
cg01521036	4.02e-29	4.31e-33	-15.2286	64.578	-0.237	cg01521036	FAM90A14;FAM90A13	NM_001164452;NM_001164456	7575240	7575363	NC_000008.10
cg11803278	6.17e-29	7.12e-33	-15.1487	64.0823	-0.258	cg11803278	PTPRN2;PTPRN2;PTPRN2	NM_002847;NM_130842;NM_130843	157951799	157951922	NC_000007.13
cg18196506	2.52e-28	3.52e-32	-14.8954	62.506	-0.253	cg18196506			107281450	107281573	NC_000014.8
cg12070304	2.73e-28	3.88e-32	-14.8802	62.4117	-0.138	cg12070304			5166758	5166881	NC_000011.9
cg03900492	4.29e-28	6.57e-32	-14.7968	61.8918	-0.272	cg03900492	PTPRN2;PTPRN2;PTPRN2	NM_002847;NM_130842;NM_130843	157345659	157345782	NC_000007.13
cg06612016	5.21e-28	8.42e-32	-14.7577	61.6477	-0.312	cg06612016	PTPRN2;PTPRN2;PTPRN2	NM_002847;NM_130842;NM_130843	158113184	158113307	NC_000007.13
cg23390488	5.21e-28	8.43e-32	-14.7575	61.6462	-0.112	cg23390488	RPL13AP5;SNORD33;SNORD35A;SNORD34;RPL13A;SNORD32A	NR_026712;NR_000020;NR_000018;NR_000019;NM_012423;NR_000021	49993150	49993273	NC_000019.9
cg03963784	5.51e-28	9.2e-32	-14.7437	61.5604	-0.0989	cg03963784			144114242	144114365	NC_000007.13
cg02704570	8.46e-28	1.48e-31	-14.6685	61.0906	-0.285	cg02704570	PTPRN2;PTPRN2;PTPRN2	NM_002847;NM_130842;NM_130843	157647109	157647232	NC_000007.13
cg08248003	8.57e-28	1.53e-31	-14.6631	61.0573	-0.264	cg08248003			17632043	17632166	NC_000005.9
cg05592278	8.57e-28	1.54e-31	-14.6628	61.0553	-0.135	cg05592278	LRRC37A3	NM_199340	62870439	62870562	NC_000017.10
cg02855558	9.93e-28	1.86e-31	-14.6324	60.8651	-0.268	cg02855558	PTPRN2;PTPRN2;PTPRN2	NM_002847;NM_130842;NM_130843	158107723	158107846	NC_000007.13
cg24610690	1.78e-27	3.51e-31	-14.5324	60.24	-0.13	cg24610690			226609998	226610121	NC_000002.11
cg24878051	1.78e-27	3.53e-31	-14.5315	60.2346	-0.311	cg24878051	PRDM16;PRDM16	NM_022114;NM_199454	3305115	3305238	NC_000001.10
cg12579640	1.93e-27	3.91e-31	-14.5152	60.1325	-0.118	cg12579640			154888711	154888834	NC_000007.13
cg27030541	2.08e-27	4.28e-31	-14.501	60.0437	-0.223	cg27030541	REXO1L2P	NR_003594	86568090	86568213	NC_000008.10
cg20400795	2.74e-27	5.98e-31	-14.4485	59.715	-0.11	cg20400795	ZNF605;ZNF605	NM_183238;NM_001164715	133516439	133516562	NC_000012.11
cg21446981	3.44e-27	7.66e-31	-14.4094	59.4703	-0.283	cg21446981			37534909	37535032	NC_000007.13
cg03282689	3.76e-27	8.6e-31	-14.3912	59.3564	-0.128	cg03282689	FAM40B;FAM40B	NM_020704;NM_001134336	129116386	129116509	NC_000007.13
cg20682639	4.23e-27	9.83e-31	-14.3701	59.2241	-0.246	cg20682639	PDZD2;PDZD2	NM_178140;NM_178140	31799285	31799408	NC_000005.9
cg26573772	4.32e-27	1.01e-30	-14.3652	59.1933	-0.201	cg26573772			1245943	1246066	NC_000008.10
cg09577651	4.55e-27	1.09e-30	-14.3544	59.1256	-0.314	cg09577651	SIRPB1;SIRPB1;SIRPB1	NM_001135844;NM_006065;NM_001083910	1600705	1600828	NC_000020.10
cg02638567	5.08e-27	1.22e-30	-14.3357	59.0087	-0.258	cg02638567	WBSCR17	NM_022479	70793147	70793270	NC_000007.13
cg04204079	6.35e-27	1.56e-30	-14.298	58.7719	-0.218	cg04204079			58130323	58130446	NC_000008.10
cg24134504	6.67e-27	1.65e-30	-14.2888	58.7145	-0.248	cg24134504			76639479	76639602	NC_000018.9
cg17102269	7.68e-27	1.94e-30	-14.2633	58.5543	-0.293	cg17102269	CSMD1	NM_033225	3830691	3830814	NC_000008.10
cg20697394	8.01e-27	2.05e-30	-14.2549	58.5018	-0.3	cg20697394			132918305	132918428	NC_000012.11
cg21919599	8.4e-27	2.18e-30	-14.2448	58.4386	-0.259	cg21919599	NLRP3;NLRP3	NM_001127461;NM_001079821	247579312	247579435	NC_000001.10
cg18608440	8.57e-27	2.24e-30	-14.2405	58.4112	-0.205	cg18608440			17519013	17519136	NC_000005.9
cg22291580	1.11e-26	3.05e-30	-14.192	58.1071	-0.247	cg22291580			144154130	144154253	NC_000008.10
cg23328109	1.16e-26	3.22e-30	-14.1837	58.0554	-0.135	cg23328109	REXO1L2P	NR_003594	86568163	86568286	NC_000008.10
cg03257417	1.28e-26	3.63e-30	-14.1648	57.9367	-0.283	cg03257417			111189871	111189994	NC_000001.10
cg07223253	1.59e-26	4.67e-30	-14.1252	57.6878	-0.236	cg07223253	GIMAP8;GIMAP8	NM_175571;NM_175571	150147988	150148111	NC_000007.13
cg03315407	2.12e-26	6.28e-30	-14.0788	57.3964	-0.287	cg03315407	ANKH	NM_054027	14810180	14810303	NC_000005.9
cg07095091	2.61e-26	7.83e-30	-14.0439	57.1775	-0.0981	cg07095091	DLEU7	NM_198989	51326803	51326926	NC_000013.10
cg17518550	3.03e-26	9.31e-30	-14.0169	57.0076	-0.251	cg17518550	C1orf150	NM_145278	247712383	247712506	NC_000001.10
cg13071609	3.31e-26	1.04e-29	-13.9995	56.8981	-0.117	cg13071609			14336117	14336240	NC_000003.11
cg24755459	3.31e-26	1.05e-29	-13.998	56.8889	-0.273	cg24755459			101908865	101908988	NC_000014.8
cg03280523	3.51e-26	1.12e-29	-13.9879	56.825	-0.118	cg03280523			58783857	58783980	NC_000016.9
cg01812571	4.12e-26	1.34e-29	-13.9598	56.6484	-0.185	cg01812571			132970724	132970847	NC_000012.11
cg12273284	4.34e-26	1.42e-29	-13.9506	56.5909	-0.304	cg12273284	CAMK1D;CAMK1D	NM_020397;NM_153498	12490844	12490967	NC_000010.10
cg21518974	5.27e-26	1.78e-29	-13.9152	56.3683	-0.0981	cg21518974	CADM2;CADM2	NM_001167675;NM_001167674	85553266	85553389	NC_000003.11
cg08926436	6.19e-26	2.1e-29	-13.889	56.2034	-0.185	cg08926436	FAM66A	NR_026789	12235070	12235193	NC_000008.10
cg14110030	6.3e-26	2.15e-29	-13.8853	56.18	-0.107	cg14110030	MRPL11;MRPL11;MRPL11	NM_170739;NM_016050;NM_170738	66207458	66207581	NC_000011.9
cg10875627	6.32e-26	2.18e-29	-13.8838	56.1704	-0.148	cg10875627			99993323	99993446	NC_000005.9
cg24357770	6.67e-26	2.32e-29	-13.8735	56.1061	-0.226	cg24357770			7868012	7868135	NC_000008.10
cg23597178	7.65e-26	2.69e-29	-13.8502	55.9595	-0.118	cg23597178			79835804	79835927	NC_000010.10
cg18633471	9.47e-26	3.41e-29	-13.8322	55.727	-0.226	cg18633471	PTPRN2;PTPRN2;PTPRN2	NM_002847;NM_130842;NM_130843	157669880	157670003	NC_000007.13
cg02777369	9.9e-26	3.59e-29	-13.8053	55.6768	-0.114	cg02777369			54025845	54025968	NC_000013.10
cg03467405	1.04e-25	3.8e-29	-13.7962	55.619	-0.31	cg03467405	PARVG;PARVG;PARVG;PARVG;PARVG;PARVG	NM_001137605;NR_024427;NM_001137606;NR_024428;NR_024426;NM_022141	44577097	44577220	NC_000022.10
cg19388930	1.15e-25	4.22e-29	-13.7798	55.5158	-0.258	cg19388930			129564373	129564496	NC_000011.9
cg11017535	1.18e-25	4.35e-29	-13.775	55.4861	-0.211	cg11017535	P704P	NM_001145442	20020668	20020791	NC_000014.8
cg16501560	1.23e-25	4.58e-29	-13.767	55.4353	-0.205	cg16501560	KRTAP12-3;C21orf29	NM_198697;NM_144991	46078007	46078130	NC_000021.8
cg05493407	1.24e-25	4.66e-29	-13.7643	55.4188	-0.25	cg05493407		NM_001166373	164816619	164816742	NC_000004.11
cg13505693	1.44e-25	5.53e-29	-13.7375	55.2495	-0.27	cg13505693			155989496	155989619	NC_000007.13
cg23837191	1.47e-25	5.71e-29	-13.7326	55.2188	-0.259	cg23837191			77335239	77335362	NC_000018.9
cg03653377	1.49e-25	5.82e-29	-13.7294	55.1989	-0.224	cg03653377	PTPRN2;PTPRN2;PTPRN2	NM_002847;NM_130842;NM_130843	158107573	158107696	NC_000007.13
cg17981028	1.76e-25	6.95e-29	-13.7017	55.0244	-0.127	cg17981028			80288880	80289003	NC_000008.10
cg21235179	2.03e-25	8.09e-29	-13.6965	54.8762	-0.104	cg21235179			79325224	79325347	NC_000017.10
cg02614785	2.04e-25	8.25e-29	-13.6749	54.8553	-0.11	cg02614785			6585041	6585164	NC_000012.11
cg12352399	2.16e-25	8.82e-29	-13.6645	54.79	-0.269	cg12352399	TOP2B	NM_001068	25689774	25689897	NC_000003.11
cg13294300	2.26e-25	9.24e-29	-13.6571	54.7434	-0.108	cg13294300			177545600	177545723	NC_000004.11
cg20031845	2.35e-25	9.89e-29	-13.6466	54.6769	-0.264	cg20031845			50306663	50306786	NC_000007.13
cg17113117	2.39e-25	1.01e-28	-13.6436	54.6584	-0.169	cg17113117			2769281	2769404	NC_000001.10
cg11709905	2.53e-25	1.08e-28	-13.6323	54.5873	-0.161	cg11709905			736287	736410	NC_000011.9
cg13464117	2.69e-25	1.17e-28	-13.6202	54.5105	-0.265	cg13464117	PTPRN2;PTPRN2;PTPRN2	NM_002847;NM_130842;NM_130843	157348161	157348284	NC_000007.13
cg05594873	2.94e-25	1.29e-28	-13.6054	54.4173	-0.292	cg05594873	ROBO1	NM_002941	79814509	79814632	NC_000003.11
cg26165993	2.94e-25	1.29e-28	-13.6047	54.4131	-0.23	cg26165993			76639446	76639569	NC_000018.9
cg02052265	3.24e-25	1.43e-28	-13.589	54.3139	-0.255	cg02052265	C1orf150	NM_145278	247712110	247712233	NC_000001.10
cg17427702	3.78e-25	1.68e-28	-13.5635	54.1532	-0.272	cg17427702			87252503	87252626	NC_000010.10
cg05335344	4e-25	1.8e-28	-13.5525	54.0841	-0.0946	cg05335344			67365812	67365935	NC_000011.9
cg02223801	4.04e-25	1.83e-28	-13.5502	54.0695	-0.316	cg02223801	PTPRN2;PTPRN2;PTPRN2	NM_002847;NM_130842;NM_130843	157366933	157367056	NC_000007.13
cg17000343	4.13e-25	1.88e-28	-13.5458	54.042	-0.223	cg17000343	FAM66E	NR_027424	7834142	7834265	NC_000008.10
cg09938406	4.63e-25	2.12e-28	-13.5275	53.9267	-0.307	cg09938406			2890369	2890492	NC_000001.10
cg01299945	4.75e-25	2.18e-28	-13.5228	53.897	-0.105	cg01299945			43966762	43966885	NC_000006.11
cg15957341	4.91e-25	2.26e-28	-13.5169	53.8597	-0.272	cg15957341	SYT9	NM_175733	7275418	7275541	NC_000011.9
cg13987700	5.03e-25	2.33e-28	-13.5123	53.8304	-0.24	cg13987700	COL5A1	NM_000093	137657798	137657921	NC_000009.11
cg20539350	5.14e-25	2.39e-28	-13.5084	53.8062	-0.166	cg20539350			56437009	56437132	NC_000007.13
cg27660192	5.62e-25	2.65e-28	-13.4922	53.7036	-0.118	cg27660192			4258933	4259056	NC_000011.9
cg24600274	5.67e-25	2.68e-28	-13.4903	53.6916	-0.0992	cg24600274			81892843	81892966	NC_000011.9
cg05203213	5.71e-25	2.72e-28	-13.4885	53.6803	-0.247	cg05203213			73419551	73419674	NC_000002.11
cg23279503	6.1e-25	2.91e-28	-13.4775	53.6113	-0.243	cg23279503	UNC5D	NM_080872	35649016	35649139	NC_000008.10
cg22337438	6.1e-25	2.94e-28	-13.4758	53.6005	-0.324	cg22337438	NLRP12;NLRP12	NM_144687;NM_144687	54327437	54327560	NC_000019.9
cg08960815	6.1e-25	2.95e-28	-13.4754	53.5979	-0.267	cg08960815	GIMAP4	NM_018326	150264767	150264890	NC_000007.13
cg16803736	6.21e-25	3.02e-28	-13.4719	53.5758	-0.126	cg16803736			81452032	81452155	NC_000015.9
cg15703165	6.74e-25	3.3e-28	-13.4579	53.4874	-0.108	cg15703165	SYT1;SYT1;SYT1	NM_001135806;NM_001135805;NM_005639	79439099	79439222	NC_000012.11
cg26987367	6.98e-25	3.44e-28	-13.4517	53.4482	-0.306	cg26987367			75402530	75402653	NC_000018.9
cg13977632	7.27e-25	3.59e-28	-13.4447	53.4041	-0.204	cg13977632			7870244	7870367	NC_000008.10
cg16596250	7.6e-25	3.77e-28	-13.4371	53.3563	-0.234	cg16596250			53099739	53099862	NC_000007.13
cg00387964	7.65e-25	3.81e-28	-13.4354	53.3454	-0.353	cg00387964	SORCS2	NM_020777	7651935	7652058	NC_000004.11
cg00584456	8.52e-25	4.32e-28	-13.416	53.2234	-0.215	cg00584456	FAM66B	NR_027423	7191273	7191396	NC_000008.10
cg22321514	8.74e-25	4.45e-28	-13.4113	53.1935	-0.114	cg22321514	CDYL	NR_026590	4724799	4724922	NC_000006.11
cg12436196	9.58e-25	4.97e-28	-13.3939	53.0838	-0.24	cg12436196	PRDM16;PRDM16	NM_022114;NM_199454	2995301	2995424	NC_000001.10
cg15318176	9.71e-25	5.06e-28	-13.3911	53.0663	-0.266	cg15318176	PTPRN2;PTPRN2;PTPRN2	NM_002847;NM_130842;NM_130843	157345827	157345950	NC_000007.13
cg07637599	1.27e-24	6.81e-28	-13.3447	52.773	-0.108	cg07637599	GPR133	NM_198827	131482237	131482360	NC_000012.11
cg00561736	1.39e-24	7.55e-28	-13.3285	52.6711	-0.182	cg00561736	FAM90A7	NM_001136572	7434441	7434564	NC_000008.10
cg12879853	1.39e-24	7.6e-28	-13.3275	52.6647	-0.125	cg12879853			121812543	121812666	NC_000005.9
cg17101703	1.39e-24	7.66e-28	-13.3264	52.6574	-0.238	cg17101703	AAK1	NM_014911	69793701	69793824	NC_000002.11
cg09653535	1.4e-24	7.71e-28	-13.3254	52.6511	-0.114	cg09653535			123856886	123857009	NC_000012.11
cg19603134	1.46e-24	8.14e-28	-13.3168	52.5969	-0.254	cg19603134	PARVG;PARVG;PARVG;PARVG;PARVG;PARVG	NM_001137605;NR_024427;NM_001137606;NR_024428;NR_024426;NM_022141	44577240	44577363	NC_000022.10
ch.15.68126615R	1.46e-24	8.17e-28	-13.3335	52.5945	-0.166	ch.15.68126615R			70339561	70339684	NC_000015.9
cg05129572	1.5e-24	8.41e-28	-13.3117	52.5651	-0.249	cg05129572	NEDD4;NEDD4	NM_198400;NM_006154	56138634	56138757	NC_000015.9
cg26874367	1.51e-24	8.51e-28	-13.3099	52.5538	-0.303	cg26874367			129381792	129381915	NC_000002.11
cg19259829	1.62e-24	9.22e-28	-13.2974	52.4744	-0.104	cg19259829			46743446	46743569	NC_000006.11
cg24126888	1.75e-24	1e-27	-13.2843	52.3922	-0.121	cg24126888			86556176	86556299	NC_000008.10
cg02290350	1.88e-24	1.08e-27	-13.2725	52.3172	-0.201	cg02290350			58132656	58132779	NC_000008.10
cg22498223	2.03e-24	1.18e-27	-13.2583	52.2276	-0.263	cg22498223	PTPRN2;PTPRN2;PTPRN2	NM_002847;NM_130842;NM_130843	158277675	158277798	NC_000007.13
cg23350558	2.06e-24	1.2e-27	-13.2558	52.2117	-0.095	cg23350558			28241175	28241298	NC_000003.11
cg16663891	2.11e-24	1.24e-27	-13.2511	52.1826	-0.279	cg16663891			66575472	66575595	NC_000003.11
cg17054879	2.14e-24	1.27e-27	-13.2473	52.1585	-0.304	cg17054879			91757672	91757795	NC_000002.11
cg03578552	2.23e-24	1.34e-27	-13.239	52.1057	-0.11	cg03578552			105207165	105207288	NC_000001.10
cg14209165	2.33e-24	1.42e-27	-13.2301	52.0498	-0.0986	cg14209165			66757362	66757485	NC_000011.9
cg24539569	2.47e-24	1.51e-27	-13.2203	51.9877	-0.0796	cg24539569			10028003	10028126	NC_000012.11
cg05965745	2.59e-24	1.6e-27	-13.2115	51.9322	-0.297	cg05965745	PRDM16;PRDM16	NM_022114;NM_199454	3077798	3077921	NC_000001.10
cg08526209	2.64e-24	1.63e-27	-13.2083	51.912	-0.24	cg08526209			139400319	139400442	NC_000003.11
cg00211403	2.66e-24	1.65e-27	-13.2067	51.9019	-0.209	cg00211403	WSCD2	NM_014653	108525241	108525364	NC_000012.11
cg22871485	2.76e-24	1.72e-27	-13.2003	51.8613	-0.292	cg22871485	PRAME;LOC648691;PRAME;PRAME;PRAME;PRAME	NM_206953;NR_027426;NM_006115;NM_206955;NM_206956;NM_206954	22901830	22901953	NC_000022.10
cg15544071	2.84e-24	1.79e-27	-13.194	51.8218	-0.267	cg15544071	LIFR;LIFR	NM_001127671;NM_002310	38528510	38528633	NC_000005.9
cg01132160	2.88e-24	1.81e-27	-13.1917	51.8072	-0.125	cg01132160	N4BP2	NM_018177	40143195	40143318	NC_000004.11
cg20393824	2.95e-24	1.87e-27	-13.1871	51.7783	-0.13	cg20393824			91383145	91383268	NC_000006.11
cg09027472	2.98e-24	1.89e-27	-13.1851	51.7655	-0.207	cg09027472	PTPRN2;PTPRN2;PTPRN2	NM_002847;NM_130842;NM_130843	157981337	157981460	NC_000007.13
cg03980072	3.1e-24	1.99e-27	-13.1774	51.7169	-0.234	cg03980072			156112798	156112921	NC_000007.13
cg03611733	3.39e-24	2.18e-27	-13.1631	51.6267	-0.106	cg03611733			45585637	45585760	NC_000015.9
cg24499059	3.55e-24	2.31e-27	-13.1537	51.5672	-0.121	cg24499059			68859856	68859979	NC_000007.13
cg06878499	4.29e-24	2.82e-27	-13.1225	51.3701	-0.288	cg06878499			239621510	239621633	NC_000001.10
cg12724498	4.29e-24	2.84e-27	-13.1217	51.3649	-0.234	cg12724498	PTPRN2;PTPRN2;PTPRN2	NM_002847;NM_130842;NM_130843	157409918	157410041	NC_000007.13
cg08261450	4.77e-24	3.19e-27	-13.1033	51.2488	-0.254	cg08261450	TMEM132D	NM_133448	130384734	130384857	NC_000012.11
cg08837676	4.77e-24	3.21e-27	-13.1024	51.243	-0.112	cg08837676			191625074	191625197	NC_000002.11
cg13102244	4.96e-24	3.39e-27	-13.094	51.1901	-0.215	cg13102244	PTPRN2;PTPRN2;PTPRN2	NM_002847;NM_130842;NM_130843	158198569	158198692	NC_000007.13
cg06013494	4.96e-24	3.41e-27	-13.0931	51.1844	-0.275	cg06013494	CD300LB	NM_174892	72528764	72528887	NC_000017.10
cg12403132	4.98e-24	3.43e-27	-13.092	51.1775	-0.274	cg12403132			17551396	17551519	NC_000012.11
cg02698900	5.01e-24	3.47e-27	-13.0905	51.1678	-0.236	cg02698900			1094770	1094893	NC_000008.10
cg20867475	5.67e-24	3.98e-27	-13.0687	51.0305	-0.0857	cg20867475			80173719	80173842	NC_000013.10
cg25538881	5.71e-24	4.03e-27	-13.0668	51.0181	-0.224	cg25538881			129294825	129294948	NC_000002.11
cg22831949	5.77e-24	4.09e-27	-13.0648	51.0055	-0.268	cg22831949	PTPRN2;PTPRN2;PTPRN2	NM_002847;NM_130842;NM_130843	158103493	158103616	NC_000007.13
cg01771065	5.84e-24	4.15e-27	-13.0623	50.9897	-0.253	cg01771065			102102407	102102530	NC_000014.8
ch.1.839062R	5.94e-24	4.23e-27	-13.0594	50.9714	-0.106	ch.1.839062R	RUNX3	NM_001031680	25282539	25282662	NC_000001.10
cg07103517	5.97e-24	4.28e-27	-13.0576	50.9602	-0.265	cg07103517	IKZF1	NM_006060	50348485	50348608	NC_000007.13
cg04544946	6.07e-24	4.39e-27	-13.0536	50.9347	-0.211	cg04544946			978226	978349	NC_000008.10
cg25247520	6.28e-24	4.57e-27	-13.0474	50.8957	-0.259	cg25247520	MIR1204;PVT1	NR_031609;NR_003367	128808017	128808140	NC_000008.10
cg21656937	7.07e-24	5.2e-27	-13.0273	50.7685	-0.231	cg21656937			54086662	54086785	NC_000012.11
cg13989981	7.47e-24	5.54e-27	-13.0173	50.7052	-0.0992	cg13989981	TPST1	NM_003596	65695583	65695706	NC_000007.13
cg16528186	8.23e-24	6.15e-27	-13.0171	50.6032	-0.203	cg16528186	CTAGE6	NM_178561	143453526	143453649	NC_000007.13
cg11769925	8.48e-24	6.37e-27	-12.9954	50.567	-0.126	cg11769925			80301560	80301683	NC_000008.10
cg10274029	8.84e-24	6.68e-27	-12.9882	50.5213	-0.282	cg10274029			85981336	85981459	NC_000016.9
cg10157972	8.84e-24	6.69e-27	-12.9879	50.5197	-0.21	cg10157972	LOC441294	NM_001008747	143270135	143270258	NC_000007.13
cg02947862	9.12e-24	6.93e-27	-12.9823	50.484	-0.286	cg02947862			129979375	129979498	NC_000010.10
cg23654401	9.58e-24	7.3e-27	-12.9741	50.4326	-0.285	cg23654401	VOPP1	NM_030796	55606442	55606565	NC_000007.13
cg05926314	1.01e-23	7.68e-27	-12.9663	50.383	-0.261	cg05926314	PTPRN2;PTPRN2;PTPRN2	NM_002847;NM_130842;NM_130843	157347105	157347228	NC_000007.13
cg02656947	1.01e-23	7.76e-27	-12.9646	50.3726	-0.101	cg02656947			140018450	140018573	NC_000006.11
cg15645254	1.05e-23	8.1e-27	-12.9579	50.33	-0.101	cg15645254	NAALAD2	NM_005467	89901418	89901541	NC_000011.9
cg26383138	1.05e-23	8.12e-27	-12.9576	50.3281	-0.279	cg26383138	MYT1L	NM_015025	2119533	2119656	NC_000002.11
cg00367649	1.06e-23	8.26e-27	-12.955	50.3118	-0.157	cg00367649			66702975	66703098	NC_000003.11
cg03347306	1.06e-23	8.3e-27	-12.9541	50.306	-0.173	cg03347306	PRDM16;PRDM16	NM_022114;NM_199454	3216677	3216800	NC_000001.10
cg06073348	1.06e-23	8.35e-27	-12.9533	50.301	-0.135	cg06073348	FAM66A	NR_026789	12233144	12233267	NC_000008.10
cg06300866	1.09e-23	8.62e-27	-12.9482	50.2688	-0.207	cg06300866	FAM90A1	NM_018088	8376943	8377066	NC_000012.11
cg02768721	1.2e-23	9.59e-27	-12.9316	50.164	-0.316	cg02768721	PTPRN2;PTPRN2;PTPRN2	NM_002847;NM_130842;NM_130843	158221370	158221493	NC_000007.13
cg02598623	1.21e-23	9.75e-27	-12.945	50.1484	-0.0985	cg02598623			42242235	42242358	NC_000002.11
cg15720267	1.27e-23	1.03e-26	-12.9203	50.0925	-0.0942	cg15720267			16211402	16211525	NC_000012.11
cg11360416	1.27e-23	1.03e-26	-12.9203	50.0923	-0.294	cg11360416	C10orf93	NM_173572	134752049	134752172	NC_000010.10
cg15818715	1.27e-23	1.04e-26	-12.9197	50.0886	-0.255	cg15818715	PARVG;PARVG;PARVG;PARVG;PARVG;PARVG	NM_001137605;NR_024427;NM_001137606;NR_024428;NR_024426;NM_022141	44577211	44577334	NC_000022.10
cg12772435	1.28e-23	1.05e-26	-12.9175	50.0749	-0.0734	cg12772435			110385518	110385641	NC_000013.10
cg08337633	1.36e-23	1.12e-26	-12.9071	50.009	-0.32	cg08337633	VOPP1	NM_030796	55602109	55602232	NC_000007.13
cg11874976	1.36e-23	1.13e-26	-12.9065	50.005	-0.265	cg11874976			101908830	101908953	NC_000014.8
cg06813886	1.36e-23	1.13e-26	-12.9064	50.0048	-0.0793	cg06813886			19239748	19239871	NC_000010.10
cg19653345	1.4e-23	1.17e-26	-12.9009	49.9696	-0.227	cg19653345	PARVG;PARVG;PARVG;PARVG;PARVG;PARVG	NM_001137605;NR_024427;NM_001137606;NR_024428;NR_024426;NM_022141	44577222	44577345	NC_000022.10
cg14019757	1.42e-23	1.19e-26	-12.8982	49.953	-0.251	cg14019757	ABCA10	NM_080282	67231728	67231851	NC_000017.10
cg04042800	1.45e-23	1.21e-26	-12.8948	49.9313	-0.0845	cg04042800			95311840	95311963	NC_000008.10
cg10189395	1.45e-23	1.22e-26	-12.8936	49.9237	-0.193	cg10189395			52849566	52849689	NC_000017.10
cg16250868	1.45e-23	1.23e-26	-12.8932	49.9214	-0.299	cg16250868	SDK1	NM_152744	3710628	3710751	NC_000007.13
cg25988204	1.51e-23	1.28e-26	-12.8864	49.878	-0.253	cg25988204	HAVCR1;HAVCR1	NM_012206;NM_001099414	156477237	156477360	NC_000005.9
cg10612692	1.6e-23	1.36e-26	-12.8767	49.8169	-0.243	cg10612692	RIMBP2	NM_015347	130957675	130957798	NC_000012.11
cg10346147	1.63e-23	1.39e-26	-12.8734	49.7957	-0.113	cg10346147			55227718	55227841	NC_000011.9
cg05666526	1.63e-23	1.4e-26	-12.873	49.7934	-0.104	cg05666526			43395875	43395998	NC_000010.10
cg24806893	1.64e-23	1.42e-26	-12.8708	49.7797	-0.0789	cg24806893			226275283	226275406	NC_000001.10
cg02848072	1.77e-23	1.54e-26	-12.8573	49.6944	-0.12	cg02848072			86556171	86556294	NC_000008.10
cg23200675	1.78e-23	1.56e-26	-12.8561	49.6864	-0.101	cg23200675			220065424	220065547	NC_000002.11
cg02897974	1.8e-23	1.58e-26	-12.8533	49.6693	-0.223	cg02897974			112673923	112674046	NC_000013.10
cg19006220	1.84e-23	1.63e-26	-12.8492	49.6429	-0.31	cg19006220			4050719	4050842	NC_000002.11
cg12024826	1.84e-23	1.63e-26	-12.8486	49.6393	-0.258	cg12024826	WDFY4	NM_020945	49893336	49893459	NC_000010.10
cg07230581	1.86e-23	1.65e-26	-12.8471	49.6298	-0.276	cg07230581	OPCML	NM_001012393	133403211	133403334	NC_000011.9
cg05864433	1.96e-23	1.76e-26	-12.8369	49.5654	-0.307	cg05864433	AMZ1	NM_133463	2738728	2738851	NC_000007.13
cg19159011	1.96e-23	1.76e-26	-12.8368	49.5646	-0.252	cg19159011	IKZF1	NM_006060	50348870	50348993	NC_000007.13
cg22361413	2.07e-23	1.88e-26	-12.8262	49.4977	-0.244	cg22361413	PBX1	NM_002585	164689630	164689753	NC_000001.10
cg10792227	2.11e-23	1.92e-26	-12.8229	49.4766	-0.117	cg10792227			116226967	116227090	NC_000008.10
cg14345215	2.23e-23	2.05e-26	-12.8132	49.4157	-0.0956	cg14345215	ERBB4;ERBB4	NM_005235;NM_001042599	212388373	212388496	NC_000002.11
cg02467451	2.23e-23	2.06e-26	-12.8279	49.4109	-0.256	cg02467451			132923603	132923726	NC_000012.11
cg17747619	2.23e-23	2.06e-26	-12.8121	49.4087	-0.182	cg17747619			9604340	9604463	NC_000004.11
cg02571448	2.33e-23	2.16e-26	-12.8048	49.3624	-0.16	cg02571448	PCBP3;PCBP3	NM_020528;NM_001130141	47294762	47294885	NC_000021.8
cg13257690	2.36e-23	2.19e-26	-12.8028	49.3495	-0.253	cg13257690			101908752	101908875	NC_000014.8
cg22967008	2.57e-23	2.39e-26	-12.7888	49.261	-0.253	cg22967008	SMOC2;SMOC2	NM_022138;NM_001166412	169026695	169026818	NC_000006.11
cg02314201	2.6e-23	2.43e-26	-12.7865	49.2464	-0.249	cg02314201			134843775	134843898	NC_000010.10
cg05886469	2.61e-23	2.45e-26	-12.7855	49.2405	-0.102	cg05886469			66205079	66205202	NC_000017.10
cg15230460	2.62e-23	2.46e-26	-12.7844	49.2334	-0.249	cg15230460	FAM66D	NR_027425	11989691	11989814	NC_000008.10
cg18418051	2.68e-23	2.53e-26	-12.7802	49.2071	-0.229	cg18418051	NPR3	NM_000908	32734970	32735093	NC_000005.9
cg07603267	2.93e-23	2.79e-26	-12.7649	49.11	-0.0959	cg07603267			76293839	76293962	NC_000011.9
cg03505654	3.06e-23	2.93e-26	-12.7575	49.0632	-0.25	cg03505654	NLRP3;NLRP3	NM_001079821;NM_001127461	247579608	247579731	NC_000001.10
cg11204987	3.08e-23	2.96e-26	-12.7559	49.0534	-0.109	cg11204987	AGBL4	NM_032785	49723190	49723313	NC_000001.10
cg04214399	3.11e-23	2.99e-26	-12.7539	49.0407	-0.0866	cg04214399			35532928	35533051	NC_000005.9
cg17989763	3.12e-23	3.02e-26	-12.7528	49.0337	-0.274	cg17989763			86863762	86863885	NC_000010.10
cg26159860	3.22e-23	3.11e-26	-12.7478	49.002	-0.266	cg26159860			133469193	133469316	NC_000011.9
cg10448687	3.25e-23	3.15e-26	-12.7459	48.9903	-0.0782	cg10448687	C13orf35	NM_207440	113333317	113333440	NC_000013.10
cg03682192	3.26e-23	3.17e-26	-12.7449	48.9837	-0.298	cg03682192			49441172	49441295	NC_000016.9
cg04900186	3.27e-23	3.19e-26	-12.7441	48.9787	-0.292	cg04900186	IKZF1	NM_006060	50347487	50347610	NC_000007.13
cg00307501	3.4e-23	3.32e-26	-12.738	48.9398	-0.128	cg00307501			59017133	59017256	NC_000016.9
cg27289306	3.49e-23	3.41e-26	-12.7335	48.9118	-0.11	cg27289306			5834425	5834548	NC_000007.13
cg01344787	3.55e-23	3.48e-26	-12.7302	48.8909	-0.111	cg01344787			42447447	42447570	NC_000017.10
cg24789143	3.61e-23	3.55e-26	-12.7273	48.8725	-0.145	cg24789143	USP17L2;FAM66D	NM_201402;NR_027425	11997496	11997619	NC_000008.10
cg12117684	3.66e-23	3.61e-26	-12.7249	48.8571	-0.19	cg12117684	BMPR1B	NM_001203	96077623	96077746	NC_000004.11
cg11136406	3.7e-23	3.66e-26	-12.7225	48.842	-0.0932	cg11136406			62238644	62238767	NC_000004.11
cg21578929	3.75e-23	3.72e-26	-12.7201	48.8268	-0.0957	cg21578929	LOC646498	NM_001080528	49219318	49219441	NC_000003.11
cg08713098	3.77e-23	3.74e-26	-12.7191	48.8204	-0.256	cg08713098	ZCWPW1	NM_017984	100005500	100005623	NC_000007.13
cg15711772	3.9e-23	3.9e-26	-12.7127	48.7801	-0.0946	cg15711772	VWA3B	NM_144992	98756447	98756570	NC_000002.11
cg06872010	4.08e-23	4.12e-26	-12.7041	48.7257	-0.197	cg06872010	FAM66A	NR_026789	12236258	12236381	NC_000008.10
cg22614748	4.17e-23	4.22e-26	-12.7002	48.7011	-0.0887	cg22614748	VPS8;VPS8	NM_015303;NM_001009921	184721891	184722014	NC_000003.11
cg01952913	4.28e-23	4.35e-26	-12.6957	48.6723	-0.235	cg01952913			1094904	1095027	NC_000008.10
cg16557061	4.29e-23	4.36e-26	-12.7105	48.671	-0.24	cg16557061	PTPRN2;PTPRN2;PTPRN2	NM_002847;NM_130842;NM_130843	157402263	157402386	NC_000007.13
cg10525642	4.33e-23	4.42e-26	-12.6931	48.6563	-0.234	cg10525642	SORCS2	NM_020777	7373375	7373498	NC_000004.11
cg05073880	4.4e-23	4.5e-26	-12.6902	48.6379	-0.102	cg05073880	ZNF767;ZNF767	NR_027788;NR_027789	149251163	149251286	NC_000007.13
cg21511748	4.42e-23	4.53e-26	-12.6892	48.6314	-0.112	cg21511748			517400	517523	NC_000011.9
cg01515802	4.98e-23	5.14e-26	-12.6695	48.507	-0.286	cg01515802	LAIR1;LAIR1	NM_021706;NM_002287	54876749	54876872	NC_000019.9
cg02071798	5.24e-23	5.46e-26	-12.66	48.4471	-0.0776	cg02071798	SLC41A2	NM_032148	105298569	105298692	NC_000012.11
cg07424785	5.31e-23	5.54e-26	-12.6579	48.4334	-0.237	cg07424785	PRDM16;PRDM16	NM_022114;NM_199454	3204078	3204201	NC_000001.10
cg15094119	5.39e-23	5.64e-26	-12.6552	48.4164	-0.178	cg15094119	PTPRN2;PTPRN2;PTPRN2	NM_002847;NM_130842;NM_130843	157670003	157670126	NC_000007.13
cg00431968	5.68e-23	5.97e-26	-12.6463	48.3604	-0.232	cg00431968			92528313	92528436	NC_000008.10
cg16050028	5.73e-23	6.03e-26	-12.6448	48.3505	-0.254	cg16050028			6068454	6068577	NC_000017.10
cg19823406	5.78e-23	6.1e-26	-12.6429	48.3387	-0.0883	cg19823406			136845083	136845206	NC_000002.11
cg07095908	5.92e-23	6.28e-26	-12.6383	48.3096	-0.249	cg07095908			430882	431005	NC_000002.11
ch.8.2197061F	5.92e-23	6.28e-26	-12.6383	48.3094	-0.217	ch.8.2197061F			109278439	109278562	NC_000008.10
cg10066481	5.94e-23	6.32e-26	-12.6373	48.3035	-0.102	cg10066481			76924718	76924841	NC_000002.11
cg26835440	6.22e-23	6.66e-26	-12.6292	48.2524	-0.115	cg26835440			55037773	55037896	NC_000008.10
cg03195031	6.6e-23	7.09e-26	-12.6193	48.1896	-0.105	cg03195031			101418132	101418255	NC_000003.11
cg06904408	6.61e-23	7.12e-26	-12.6187	48.1857	-0.211	cg06904408	TERT;TERT	NM_198255;NM_198253	1289828	1289951	NC_000005.9
cg26865084	7.04e-23	7.63e-26	-12.608	48.1179	-0.217	cg26865084			169223825	169223948	NC_000006.11
cg01579629	7.09e-23	7.69e-26	-12.6067	48.1099	-0.121	cg01579629	NGEF;NGEF	NM_019850;NM_001114090	233771125	233771248	NC_000002.11
cg24499605	7.17e-23	7.79e-26	-12.6046	48.0967	-0.277	cg24499605	PRDM16;PRDM16	NM_022114;NM_199454	3142925	3143048	NC_000001.10
cg18988861	8.08e-23	8.88e-26	-12.5842	47.9676	-0.134	cg18988861			51452804	51452927	NC_000007.13
cg06889086	8.12e-23	8.95e-26	-12.583	47.96	-0.233	cg06889086	VOPP1	NM_030796	55638230	55638353	NC_000007.13
cg21878746	8.26e-23	9.13e-26	-12.5799	47.9403	-0.27	cg21878746	LAIR1;LAIR1	NM_021706;NM_002287	54876728	54876851	NC_000019.9
ch.16.72302375R	8.31e-23	9.2e-26	-12.5787	47.9328	-0.162	ch.16.72302375R			73744874	73744997	NC_000016.9
cg15849098	8.31e-23	9.23e-26	-12.5782	47.9299	-0.272	cg15849098	GIMAP7	NM_153236	150211761	150211884	NC_000007.13
cg12073615	9.05e-23	1.02e-25	-12.5634	47.836	-0.172	cg12073615	FAM90A1	NM_018088	8375310	8375433	NC_000012.11
cg00363815	9.05e-23	1.02e-25	-12.5634	47.8358	-0.0932	cg00363815	SNORD111;SF3B3	NR_003079;NM_012426	70570497	70570620	NC_000016.9
cg11611282	9.16e-23	1.03e-25	-12.5611	47.8214	-0.205	cg11611282			168809744	168809867	NC_000006.11
cg18405536	9.57e-23	1.08e-25	-12.5537	47.7746	-0.0875	cg18405536			64270264	64270387	NC_000014.8
cg23343389	9.57e-23	1.08e-25	-12.5537	47.7745	-0.275	cg23343389	PTPRN2;PTPRN2;PTPRN2	NM_002847;NM_130842;NM_130843	158103415	158103538	NC_000007.13
cg24790878	1.01e-22	1.14e-25	-12.5447	47.7179	-0.101	cg24790878			12665869	12665992	NC_000005.9
cg14552947	1.03e-22	1.16e-25	-12.5424	47.7031	-0.262	cg14552947			28657329	28657452	NC_000010.10
cg15209440	1.04e-22	1.18e-25	-12.5393	47.6839	-0.24	cg15209440			179696814	179696937	NC_000001.10
cg25642880	1.07e-22	1.23e-25	-12.5335	47.647	-0.103	cg25642880	UGGT2	NM_020121	96581176	96581299	NC_000013.10
cg21762236	1.07e-22	1.23e-25	-12.5333	47.6455	-0.101	cg21762236			93859243	93859366	NC_000013.10
cg13464436	1.08e-22	1.24e-25	-12.5316	47.6349	-0.146	cg13464436	GSTM5	NM_000851	110253977	110254100	NC_000001.10
cg01999622	1.08e-22	1.25e-25	-12.5315	47.6344	-0.244	cg01999622	PTPRN2;PTPRN2;PTPRN2	NM_002847;NM_130842;NM_130843	157694573	157694696	NC_000007.13
cg14853981	1.08e-22	1.25e-25	-12.5305	47.6283	-0.11	cg14853981			67561247	67561370	NC_000002.11
cg18862888	1.09e-22	1.27e-25	-12.5289	47.6179	-0.111	cg18862888			31346162	31346285	NC_000010.10
cg12655921	1.14e-22	1.32e-25	-12.5218	47.5731	-0.286	cg12655921	MYT1L	NM_015025	2019937	2020060	NC_000002.11
cg18579631	1.14e-22	1.34e-25	-12.5206	47.5654	-0.204	cg18579631			86556749	86556872	NC_000008.10
cg12660813	1.16e-22	1.36e-25	-12.5183	47.5509	-0.257	cg12660813	PRDM16;PRDM16	NM_022114;NM_199454	3192343	3192466	NC_000001.10
cg17748769	1.16e-22	1.37e-25	-12.5167	47.5406	-0.259	cg17748769	PTPRN2;PTPRN2;PTPRN2	NM_002847;NM_130842;NM_130843	158352181	158352304	NC_000007.13
cg09584006	1.16e-22	1.37e-25	-12.5165	47.5393	-0.145	cg09584006			50464990	50465113	NC_000015.9
cg00181676	1.17e-22	1.38e-25	-12.5157	47.5348	-0.125	cg00181676			196325301	196325424	NC_000003.11
cg24025801	1.19e-22	1.41e-25	-12.5122	47.5126	-0.0745	cg24025801			44910631	44910754	NC_000007.13
cg09013995	1.21e-22	1.43e-25	-12.5241	47.4963	-0.0943	cg09013995			69284385	69284508	NC_000001.10
cg11641738	1.23e-22	1.47e-25	-12.5201	47.4708	-0.0967	cg11641738	CCDC41;CCDC41	NM_001042399;NM_016122	94848541	94848664	NC_000012.11
cg08454015	1.26e-22	1.51e-25	-12.5013	47.4435	-0.246	cg08454015			240078452	240078575	NC_000001.10
cg08387538	1.3e-22	1.56e-25	-12.4963	47.4115	-0.281	cg08387538	DLGAP2	NM_004745	1527995	1528118	NC_000008.10
cg02813741	1.31e-22	1.58e-25	-12.4946	47.4012	-0.077	cg02813741			91148429	91148552	NC_000013.10
cg03610323	1.35e-22	1.63e-25	-12.4896	47.3695	-0.0749	cg03610323	STAC	NM_003149	36495821	36495944	NC_000003.11
cg23270714	1.45e-22	1.77e-25	-12.4766	47.2873	-0.215	cg23270714			155971398	155971521	NC_000007.13
cg06817802	1.51e-22	1.85e-25	-12.47	47.2456	-0.157	cg06817802	TERT;TERT	NM_198255;NM_198253	1291319	1291442	NC_000005.9
cg00111723	1.52e-22	1.86e-25	-12.4689	47.2384	-0.137	cg00111723			27120949	27121072	NC_000005.9
cg07926178	1.54e-22	1.89e-25	-12.4663	47.2221	-0.0841	cg07926178	PTPRN2;PTPRN2;PTPRN2	NM_002847;NM_130842;NM_130843	158130463	158130586	NC_000007.13
cg04244985	1.56e-22	1.93e-25	-12.463	47.2012	-0.253	cg04244985	KIR3DX1	NR_026716	55043845	55043968	NC_000019.9
cg16953753	1.56e-22	1.93e-25	-12.4627	47.1996	-0.0798	cg16953753			25135360	25135483	NC_000013.10
cg10423607	1.57e-22	1.94e-25	-12.462	47.195	-0.233	cg10423607	CPA6;CPA6	NM_020361;NM_001127445	68418480	68418603	NC_000008.10
cg14928510	1.59e-22	1.98e-25	-12.4591	47.1765	-0.281	cg14928510	NLRP7;NLRP7;NLRP7	NM_206828;NM_001127255;NM_139176	55449439	55449562	NC_000019.9
cg03636930	1.61e-22	2e-25	-12.4574	47.1656	-0.23	cg03636930			1094826	1094949	NC_000008.10
cg27410165	1.63e-22	2.03e-25	-12.4551	47.1514	-0.274	cg27410165			18978169	18978292	NC_000011.9
cg00699898	1.7e-22	2.12e-25	-12.4481	47.1073	-0.222	cg00699898	TTLL10;TTLL10	NM_153254;NM_001130045	1117562	1117685	NC_000001.10
cg08737116	1.74e-22	2.18e-25	-12.4442	47.0824	-0.229	cg08737116	SLC22A15	NM_018420	116563487	116563610	NC_000001.10
cg09294072	1.8e-22	2.27e-25	-12.4378	47.0416	-0.238	cg09294072			106366523	106366646	NC_000014.8
cg17471456	1.81e-22	2.28e-25	-12.437	47.037	-0.0917	cg17471456			103713302	103713425	NC_000007.13
cg22147827	1.89e-22	2.4e-25	-12.4293	46.9882	-0.107	cg22147827			55809665	55809788	NC_000007.13
cg05865746	1.97e-22	2.5e-25	-12.4227	46.9462	-0.186	cg05865746	RAP1GAP2;RAP1GAP2	NM_001100398;NM_015085	2699553	2699676	NC_000017.10
cg20159095	1.98e-22	2.53e-25	-12.421	46.9355	-0.274	cg20159095	PTPRN2;PTPRN2;PTPRN2	NM_002847;NM_130842;NM_130843	157342543	157342666	NC_000007.13
cg15403616	1.98e-22	2.54e-25	-12.4203	46.931	-0.206	cg15403616			105658685	105658808	NC_000014.8
cg07267845	1.98e-22	2.54e-25	-12.4201	46.9298	-0.257	cg07267845	PTPRN2;PTPRN2;PTPRN2	NM_002847;NM_130842;NM_130843	157345566	157345689	NC_000007.13
cg14015765	1.98e-22	2.55e-25	-12.4199	46.929	-0.266	cg14015765			132734310	132734433	NC_000010.10
cg05891292	1.99e-22	2.56e-25	-12.4189	46.9225	-0.306	cg05891292	POM121L12	NM_182595	53103310	53103433	NC_000007.13
cg00084798	2e-22	2.58e-25	-12.4179	46.9159	-0.324	cg00084798			142841965	142842088	NC_000008.10
cg02148654	2.05e-22	2.65e-25	-12.4138	46.8905	-0.26	cg02148654			157296159	157296282	NC_000007.13
cg13103143	2.05e-22	2.67e-25	-12.427	46.8842	-0.222	cg13103143			1946688	1946811	NC_000001.10
cg02637474	2.05e-22	2.67e-25	-12.4127	46.8835	-0.293	cg02637474	PTPRN2;PTPRN2;PTPRN2	NM_002847;NM_130842;NM_130843	157340554	157340677	NC_000007.13
cg21160516	2.06e-22	2.69e-25	-12.4114	46.875	-0.0913	cg21160516			78446060	78446183	NC_000006.11
cg26236972	2.09e-22	2.73e-25	-12.409	46.86	-0.26	cg26236972			237921310	237921433	NC_000002.11
cg25640288	2.09e-22	2.74e-25	-12.4086	46.8573	-0.0959	cg25640288			52803384	52803507	NC_000012.11
cg14746841	2.11e-22	2.77e-25	-12.407	46.8472	-0.104	cg14746841	SORCS2	NM_020777	7604322	7604445	NC_000004.11
cg08152331	2.13e-22	2.8e-25	-12.4053	46.8364	-0.0749	cg08152331			73632683	73632806	NC_000004.11
cg07321467	2.14e-22	2.82e-25	-12.4037	46.8262	-0.209	cg07321467	BMP3	NM_001201	81960704	81960827	NC_000004.11
cg01232969	2.22e-22	2.93e-25	-12.3977	46.7886	-0.274	cg01232969			64933074	64933197	NC_000018.9
cg13588517	2.26e-22	2.99e-25	-12.3948	46.7702	-0.264	cg13588517			170562720	170562843	NC_000006.11
ch.8.128185533F	2.38e-22	3.18e-25	-12.3853	46.7102	-0.221	ch.8.128185533F			128116351	128116474	NC_000008.10
cg17685767	2.44e-22	3.26e-25	-12.3812	46.6839	-0.0937	cg17685767	UVRAG	NM_003369	75589353	75589476	NC_000011.9
cg19268477	2.54e-22	3.41e-25	-12.3884	46.6408	-0.188	cg19268477	PTPRN2;PTPRN2;PTPRN2	NM_002847;NM_130842;NM_130843	157951471	157951594	NC_000007.13
cg27246933	2.59e-22	3.48e-25	-12.3713	46.6212	-0.0753	cg27246933			38168763	38168886	NC_000017.10
cg19007523	2.6e-22	3.5e-25	-12.3704	46.6155	-0.104	cg19007523			7685087	7685210	NC_000011.9
cg09789721	2.65e-22	3.58e-25	-12.3669	46.5937	-0.283	cg09789721	SORCS2	NM_020777	7463007	7463130	NC_000004.11
cg02868521	2.76e-22	3.75e-25	-12.3595	46.5467	-0.286	cg02868521	PTPRN2;PTPRN2;PTPRN2	NM_002847;NM_130842;NM_130843	157700872	157700995	NC_000007.13
cg14189142	2.78e-22	3.78e-25	-12.3581	46.5381	-0.267	cg14189142	GALNT9	NM_001122636	132865307	132865430	NC_000012.11
cg17132591	2.81e-22	3.85e-25	-12.3553	46.5206	-0.128	cg17132591			84932797	84932920	NC_000008.10
cg00863654	2.81e-22	3.85e-25	-12.3553	46.5201	-0.103	cg00863654			66528416	66528539	NC_000012.11
cg05684715	2.81e-22	3.86e-25	-12.3549	46.5179	-0.283	cg05684715			130641648	130641771	NC_000012.11
cg15035709	2.85e-22	3.92e-25	-12.3524	46.5019	-0.101	cg15035709	C5orf34	NM_198566	43511191	43511314	NC_000005.9
cg13353015	3.11e-22	4.31e-25	-12.3377	46.4092	-0.0721	cg13353015	CSMD2	NM_052896	34547254	34547377	NC_000001.10
cg14916274	3.12e-22	4.34e-25	-12.3368	46.4034	-0.207	cg14916274			105658949	105659072	NC_000014.8
cg16977645	3.12e-22	4.35e-25	-12.3363	46.4005	-0.201	cg16977645			7872389	7872512	NC_000008.10
cg15244360	3.15e-22	4.4e-25	-12.3344	46.3883	-0.202	cg15244360			7405502	7405625	NC_000008.10
cg24889058	3.16e-22	4.42e-25	-12.3338	46.3846	-0.213	cg24889058	CHRM2;CHRM2;CHRM2;CHRM2;CHRM2;CHRM2;CHRM2;CHRM2	NM_001006631;NM_000739;NM_001006627;NM_001006628;NM_001006629;NM_001006632;NM_001006630;NM_001006626	136610019	136610142	NC_000007.13
cg26967305	3.21e-22	4.52e-25	-12.3305	46.3634	-0.252	cg26967305	KREMEN1	NM_032045	29563734	29563857	NC_000022.10
cg19859559	3.33e-22	4.71e-25	-12.3238	46.3212	-0.122	cg19859559			144041178	144041301	NC_000008.10
cg23546843	3.33e-22	4.71e-25	-12.3238	46.3211	-0.0931	cg23546843			134769715	134769838	NC_000008.10
cg17316300	3.42e-22	4.87e-25	-12.3186	46.2881	-0.256	cg17316300	IQCA1	NM_024726	237381593	237381716	NC_000002.11
cg06171420	3.45e-22	4.93e-25	-12.3166	46.2757	-0.225	cg06171420			47058388	47058511	NC_000021.8
cg13845951	3.65e-22	5.23e-25	-12.3074	46.2176	-0.0858	cg13845951			82552543	82552666	NC_000002.11
cg19638556	3.68e-22	5.31e-25	-12.3052	46.2034	-0.0788	cg19638556			70039215	70039338	NC_000010.10
cg14416623	3.71e-22	5.35e-25	-12.3039	46.1954	-0.238	cg14416623	NCKAP5;NCKAP5	NM_207363;NM_207481	133561787	133561910	NC_000002.11
cg15192120	3.82e-22	5.54e-25	-12.2986	46.1621	-0.205	cg15192120	PTPRN2;PTPRN2;PTPRN2	NM_002847;NM_130842;NM_130843	157626176	157626299	NC_000007.13
cg06099439	3.92e-22	5.7e-25	-12.2942	46.1341	-0.246	cg06099439	PRDM16;PRDM16	NM_022114;NM_199454	3146905	3147028	NC_000001.10
cg04037707	3.92e-22	5.7e-25	-12.2941	46.1335	-0.255	cg04037707			154704915	154705038	NC_000007.13
cg19241670	3.92e-22	5.7e-25	-12.294	46.1327	-0.102	cg19241670			45134721	45134844	NC_000017.10
cg02816727	3.97e-22	5.78e-25	-12.2921	46.1205	-0.0799	cg02816727			125042097	125042220	NC_000010.10
cg00119279	4.04e-22	5.91e-25	-12.2885	46.0983	-0.246	cg00119279			174427146	174427269	NC_000004.11
cg16718760	4.09e-22	5.99e-25	-12.2865	46.0853	-0.233	cg16718760	ERC2	NM_015576	55721067	55721190	NC_000003.11
cg20456243	4.1e-22	6.01e-25	-12.2859	46.0813	-0.226	cg20456243	SPEG	NM_005876	220352476	220352599	NC_000002.11
cg16491050	4.15e-22	6.09e-25	-12.2837	46.0677	-0.0538	cg16491050			6818455	6818578	NC_000012.11
cg26252135	4.16e-22	6.11e-25	-12.2972	46.0661	-0.0997	cg26252135			3361240	3361363	NC_000010.10
cg00980058	4.19e-22	6.17e-25	-12.2818	46.0559	-0.237	cg00980058	PCNXL2	NM_014801	233248709	233248832	NC_000001.10
cg17812313	4.26e-22	6.3e-25	-12.2784	46.0343	-0.306	cg17812313	PTPRN2;PTPRN2;PTPRN2	NM_002847;NM_130842;NM_130843	158270995	158271118	NC_000007.13
cg06843058	4.34e-22	6.43e-25	-12.2753	46.0144	-0.121	cg06843058			1139078	1139201	NC_000004.11
cg10625750	4.37e-22	6.5e-25	-12.2737	46.0046	-0.0788	cg10625750	CCDC109B	NM_017918	110524783	110524906	NC_000004.11
cg13028819	4.42e-22	6.57e-25	-12.2859	45.9948	-0.26	cg13028819			156157689	156157812	NC_000007.13
ch.4.183293081R	4.45e-22	6.63e-25	-12.2705	45.9844	-0.207	ch.4.183293081R			183056087	183056210	NC_000004.11
cg27658314	4.56e-22	6.83e-25	-12.2658	45.9544	-0.295	cg27658314	PTPRN2;PTPRN2;PTPRN2	NM_002847;NM_130842;NM_130843	157968629	157968752	NC_000007.13
cg11197061	4.58e-22	6.87e-25	-12.2649	45.9486	-0.315	cg11197061	EPHA6	NM_001080448	96988343	96988466	NC_000003.11
cg00988056	4.65e-22	7.01e-25	-12.2619	45.93	-0.309	cg00988056			106374554	106374677	NC_000014.8
cg24338513	4.65e-22	7.01e-25	-12.2618	45.9291	-0.109	cg24338513			210072223	210072346	NC_000001.10
cg22104394	4.72e-22	7.13e-25	-12.2592	45.913	-0.0607	cg22104394			27587224	27587347	NC_000008.10
cg26306424	4.8e-22	7.25e-25	-12.2565	45.8959	-0.104	cg26306424			21657028	21657151	NC_000014.8
cg06677416	4.82e-22	7.29e-25	-12.2557	45.8909	-0.27	cg06677416			64495627	64495750	NC_000010.10
cg00153942	4.88e-22	7.4e-25	-12.2535	45.8766	-0.172	cg00153942	KRTAP5-8	NM_021046	71249212	71249335	NC_000011.9
cg20695203	5.22e-22	7.97e-25	-12.2418	45.803	-0.239	cg20695203			112335939	112336062	NC_000013.10
cg23643973	5.29e-22	8.09e-25	-12.2395	45.7883	-0.127	cg23643973			16877204	16877327	NC_000001.10
cg09604762	5.34e-22	8.17e-25	-12.238	45.7789	-0.0768	cg09604762			49974058	49974181	NC_000003.11
cg15261270	5.37e-22	8.23e-25	-12.2367	45.7706	-0.0941	cg15261270	EXOC6;EXOC6	NM_001013848;NM_019053	94734891	94735014	NC_000010.10
cg00581154	5.43e-22	8.35e-25	-12.2346	45.7571	-0.298	cg00581154	PRDM16;PRDM16	NM_022114;NM_199454	3123695	3123818	NC_000001.10
cg21160877	5.67e-22	8.73e-25	-12.2275	45.7127	-0.119	cg21160877			9352827	9352950	NC_000004.11
cg04114537	5.72e-22	8.83e-25	-12.2259	45.7021	-0.0989	cg04114537	PLCH1;PLCH1;PLCH1	NM_001130960;NM_001130961;NM_014996	155259883	155260006	NC_000003.11
cg11479419	6.07e-22	9.41e-25	-12.2159	45.6389	-0.238	cg11479419			129979292	129979415	NC_000010.10
cg12340343	6.07e-22	9.44e-25	-12.2154	45.6362	-0.357	cg12340343			155897383	155897506	NC_000007.13
cg26797811	6.32e-22	9.89e-25	-12.2081	45.5897	-0.0896	cg26797811			33821339	33821462	NC_000016.9
cg20928777	6.39e-22	1e-24	-12.206	45.5768	-0.235	cg20928777	HS3ST3B1	NM_006041	14222235	14222358	NC_000017.10
cg16371229	6.39e-22	1e-24	-12.2194	45.576	-0.226	cg16371229	PCNXL2	NM_014801	233248845	233248968	NC_000001.10
cg16671674	6.39e-22	1e-24	-12.2058	45.5751	-0.184	cg16671674	LRP1B	NM_018557	142150452	142150575	NC_000002.11
cg18564898	6.58e-22	1.04e-24	-12.2005	45.542	-0.245	cg18564898			75402380	75402503	NC_000018.9
cg17465176	6.63e-22	1.05e-24	-12.1989	45.532	-0.0783	cg17465176			120715931	120716054	NC_000012.11
cg25147447	6.63e-22	1.05e-24	-12.1988	45.5311	-0.282	cg25147447			112212213	112212336	NC_000013.10
cg08483316	6.76e-22	1.07e-24	-12.1955	45.5102	-0.0862	cg08483316			165348000	165348123	NC_000006.11
cg16477744	6.81e-22	1.08e-24	-12.1941	45.5011	-0.222	cg16477744	PTPRN2;PTPRN2;MIR153-2;PTPRN2	NM_002847;NM_130842;NR_029689;NM_130843	157367142	157367265	NC_000007.13
cg17756105	6.88e-22	1.1e-24	-12.1922	45.4893	-0.266	cg17756105	SDK1	NM_152744	3613164	3613287	NC_000007.13
cg00217080	6.94e-22	1.11e-24	-12.1906	45.4795	-0.245	cg00217080			4050767	4050890	NC_000002.11
ch.12.109182886F	7.13e-22	1.14e-24	-12.1859	45.4495	-0.188	ch.12.109182886F			110698503	110698626	NC_000012.11
cg04122815	7.23e-22	1.16e-24	-12.1836	45.4353	-0.267	cg04122815	C5orf39	NM_001014279	43039592	43039715	NC_000005.9
cg15677271	7.37e-22	1.18e-24	-12.1805	45.4154	-0.103	cg15677271			56762557	56762680	NC_000013.10
cg21691065	7.39e-22	1.19e-24	-12.1798	45.4111	-0.241	cg21691065			2804835	2804958	NC_000001.10
cg14605396	7.42e-22	1.19e-24	-12.1789	45.4052	-0.284	cg14605396	TLR4;TLR4;TLR4	NR_024169;NM_138554;NR_024168	120478054	120478177	NC_000009.11
cg13619891	7.74e-22	1.25e-24	-12.1717	45.3599	-0.21	cg13619891			106657452	106657575	NC_000014.8
cg27199522	7.78e-22	1.26e-24	-12.1708	45.3539	-0.0996	cg27199522			8165100	8165223	NC_000016.9
cg17512382	7.82e-22	1.26e-24	-12.1698	45.3479	-0.0872	cg17512382			8667590	8667713	NC_000006.11
cg16970323	7.82e-22	1.27e-24	-12.1695	45.3461	-0.222	cg16970323	TOX2;TOX2;TOX2;TOX2	NM_001098798;NM_032883;NM_001098797;NM_001098796	42697667	42697790	NC_000020.10
cg13841979	7.84e-22	1.27e-24	-12.1687	45.3409	-0.242	cg13841979	SLC2A9;SLC2A9	NM_020041;NM_001001290	9990048	9990171	NC_000004.11
cg23202887	7.92e-22	1.29e-24	-12.167	45.3299	-0.218	cg23202887	BCL11B;BCL11B	NM_022898;NM_138576	99691372	99691495	NC_000014.8
cg21936261	8.17e-22	1.33e-24	-12.1615	45.2954	-0.125	cg21936261			12033377	12033500	NC_000008.10
cg20038038	8.19e-22	1.34e-24	-12.1609	45.2918	-0.189	cg20038038	LILRA3;LILRA3	NM_006865;NM_006865	54804217	54804340	NC_000019.9
cg26558435	8.19e-22	1.34e-24	-12.1608	45.2907	-0.215	cg26558435	ANO9	NM_001012302	431422	431545	NC_000011.9
cg19248557	8.37e-22	1.38e-24	-12.1561	45.2615	-0.292	cg19248557	HLA-DRA	NM_019111	32407838	32407961	NC_000006.11
cg13768872	8.45e-22	1.4e-24	-12.154	45.2479	-0.113	cg13768872	MAPKAP1;MAPKAP1;MAPKAP1;MAPKAP1;MAPKAP1	NM_024117;NM_001006620;NM_001006617;NM_001006621;NM_001006619	128221420	128221543	NC_000009.11
cg20061931	8.55e-22	1.42e-24	-12.1518	45.2338	-0.0932	cg20061931			95078953	95079076	NC_000004.11
cg27306802	8.61e-22	1.43e-24	-12.15	45.2229	-0.214	cg27306802	MEGF6	NM_001409	3510561	3510684	NC_000001.10
cg25130336	8.61e-22	1.44e-24	-12.15	45.2224	-0.232	cg25130336			1772638	1772761	NC_000005.9
cg01690573	8.71e-22	1.45e-24	-12.1481	45.2108	-0.0804	cg01690573	RMND1	NM_017909	151771312	151771435	NC_000006.11
cg06874895	8.77e-22	1.47e-24	-12.1467	45.2018	-0.0743	cg06874895	WDR70	NM_018034	37484025	37484148	NC_000005.9
cg07099084	8.84e-22	1.48e-24	-12.1451	45.1915	-0.301	cg07099084			2919785	2919908	NC_000001.10
cg13456960	8.9e-22	1.49e-24	-12.144	45.1846	-0.298	cg13456960	KDM4B	NM_015015	5139479	5139602	NC_000019.9
cg07879681	8.91e-22	1.49e-24	-12.1436	45.1823	-0.26	cg07879681			112336027	112336150	NC_000013.10
cg05202804	9.08e-22	1.53e-24	-12.1403	45.1615	-0.239	cg05202804	C19orf39	NM_175871	11484815	11484938	NC_000019.9
cg15941014	9.12e-22	1.54e-24	-12.1394	45.1554	-0.235	cg15941014	CAPN14	NM_001145122	31439687	31439810	NC_000002.11
cg20475082	9.23e-22	1.56e-24	-12.1368	45.1394	-0.203	cg20475082			129166686	129166809	NC_000002.11
cg00887902	9.46e-22	1.6e-24	-12.1329	45.1146	-0.239	cg00887902	XKR4	NM_052898	56436393	56436516	NC_000008.10
cg00812839	9.67e-22	1.64e-24	-12.1292	45.0914	-0.198	cg00812839			146895247	146895370	NC_000001.10
cg27646965	9.71e-22	1.65e-24	-12.1284	45.0863	-0.261	cg27646965	RAMP1	NM_005855	238814032	238814155	NC_000002.11
cg06555227	9.72e-22	1.65e-24	-12.128	45.0835	-0.231	cg06555227	PTPRN2;PTPRN2;PTPRN2	NM_002847;NM_130842;NM_130843	157366979	157367102	NC_000007.13
cg24467337	9.73e-22	1.66e-24	-12.1275	45.0808	-0.223	cg24467337	LOC284805	NR_026959	31262314	31262437	NC_000020.10
cg04801401	1.02e-21	1.75e-24	-12.1194	45.0291	-0.0895	cg04801401	NGEF;NGEF	NM_019850;NM_001114090	233770380	233770503	NC_000002.11
ch.1.95579934F	1.02e-21	1.75e-24	-12.1192	45.0278	-0.24	ch.1.95579934F			95807346	95807469	NC_000001.10
cg11205224	1.06e-21	1.82e-24	-12.1133	44.9908	-0.124	cg11205224	HEXB	NM_000521	74002417	74002540	NC_000005.9
cg21862081	1.06e-21	1.82e-24	-12.1131	44.9898	-0.234	cg21862081	POMT2	NM_013382	77769687	77769810	NC_000014.8
cg24752300	1.07e-21	1.84e-24	-12.1526	44.9845	-0.0574	cg24752300			159668182	159668305	NC_000004.11
cg18198461	1.07e-21	1.85e-24	-12.1104	44.9727	-0.236	cg18198461			143523293	143523416	NC_000008.10
cg19544746	1.09e-21	1.89e-24	-12.1074	44.9534	-0.236	cg19544746	ACOX3;ACOX3	NM_001101667;NM_003501	8405046	8405169	NC_000004.11
cg18772152	1.13e-21	1.96e-24	-12.1014	44.9154	-0.0891	cg18772152			201548886	201549009	NC_000002.11
cg15029475	1.14e-21	1.98e-24	-12.0999	44.9062	-0.256	cg15029475			3028202	3028325	NC_000005.9
cg05397362	1.17e-21	2.02e-24	-12.0966	44.8855	-0.121	cg05397362			79693203	79693326	NC_000013.10
cg18011899	1.18e-21	2.05e-24	-12.0939	44.8684	-0.131	cg18011899	PTPRN2;PTPRN2;PTPRN2	NM_002847;NM_130842;NM_130843	158124253	158124376	NC_000007.13
cg26647771	1.19e-21	2.07e-24	-12.093	44.8626	-0.267	cg26647771	NPR3	NM_000908	32768395	32768518	NC_000005.9
cg02558638	1.22e-21	2.12e-24	-12.0888	44.836	-0.0905	cg02558638			198236234	198236357	NC_000002.11
cg06721096	1.23e-21	2.15e-24	-12.0872	44.8259	-0.168	cg06721096	PTPRN2;PTPRN2;PTPRN2	NM_002847;NM_130842;NM_130843	157336864	157336987	NC_000007.13
cg03577250	1.25e-21	2.18e-24	-12.0844	44.8083	-0.145	cg03577250	LOC284805	NR_026959	31261994	31262117	NC_000020.10
cg03692412	1.25e-21	2.19e-24	-12.084	44.8059	-0.125	cg03692412			40626459	40626582	NC_000020.10
cg03334072	1.25e-21	2.2e-24	-12.0835	44.8026	-0.28	cg03334072	GIMAP5	NM_018384	150435779	150435902	NC_000007.13
cg14731462	1.26e-21	2.22e-24	-12.0819	44.7925	-0.255	cg14731462	PTPRE	NM_006504	129789429	129789552	NC_000010.10
cg00830435	1.27e-21	2.24e-24	-12.0807	44.7846	-0.253	cg00830435			2918526	2918649	NC_000001.10
cg17165848	1.3e-21	2.29e-24	-12.077	44.7618	-0.228	cg17165848	WIPF1;WIPF1	NM_003387;NM_001077269	175462452	175462575	NC_000002.11
cg18813867	1.3e-21	2.31e-24	-12.0755	44.7523	-0.133	cg18813867			57767340	57767463	NC_000011.9
cg07470207	1.3e-21	2.31e-24	-12.0754	44.7513	-0.224	cg07470207			132828746	132828869	NC_000008.10
cg05195085	1.32e-21	2.35e-24	-12.073	44.7362	-0.161	cg05195085	PTPRN2;PTPRN2;PTPRN2	NM_002847;NM_130842;NM_130843	157951403	157951526	NC_000007.13
cg07901472	1.34e-21	2.38e-24	-12.0709	44.7226	-0.0808	cg07901472			43521996	43522119	NC_000005.9
cg19752602	1.37e-21	2.45e-24	-12.0663	44.6937	-0.208	cg19752602	GRIA1;GRIA1	NM_000827;NM_001114183	153039227	153039350	NC_000005.9
cg07217499	1.41e-21	2.53e-24	-12.0617	44.6649	-0.251	cg07217499	CACNA1C;CACNA1C;CACNA1C;CACNA1C;CACNA1C;CACNA1C;CACNA1C;CACNA1C;CACNA1C;CACNA1C;CACNA1C;CACNA1C;CACNA1C;CACNA1C;CACNA1C;CACNA1C;CACNA1C;CACNA1C;CACNA1C;CACNA1C;CACNA1C;CACNA1C;CACNA1C	NM_001129844;NM_001129827;NM_001129839;NM_001129834;NM_001129841;NM_000719;NM_001129830;NM_001167625;NM_001129843;NM_001167624;NM_001129835;NM_001129837;NM_001167623;NM_001129840;NM_199460;NM_001129833;NM_001129832;NM_001129829;NM_001129846;NM_001129836;NM_001129838;NM_001129831;NM_001129842	2416339	2416462	NC_000012.11
cg21599324	1.42e-21	2.54e-24	-12.0608	44.6591	-0.182	cg21599324	GRM4	NM_000841	34074282	34074405	NC_000006.11
cg11293572	1.44e-21	2.58e-24	-12.0586	44.6453	-0.319	cg11293572	PTPRN2;PTPRN2;PTPRN2	NM_002847;NM_130842;NM_130843	158093198	158093321	NC_000007.13
cg14698665	1.44e-21	2.59e-24	-12.0578	44.64	-0.237	cg14698665	CTNND2	NM_001332	11389290	11389413	NC_000005.9
cg07420720	1.45e-21	2.6e-24	-12.0572	44.6362	-0.121	cg07420720			178113740	178113863	NC_000004.11
cg05513576	1.47e-21	2.65e-24	-12.0542	44.6173	-0.217	cg05513576			8692935	8693058	NC_000004.11
cg17185176	1.53e-21	2.77e-24	-12.047	44.5722	-0.0834	cg17185176			695636	695759	NC_000006.11
ch.1.64660926R	1.54e-21	2.8e-24	-12.0455	44.5626	-0.164	ch.1.64660926R			64888338	64888461	NC_000001.10
cg26422129	1.56e-21	2.85e-24	-12.0429	44.5459	-0.129	cg26422129			233601660	233601783	NC_000001.10
cg20157003	1.56e-21	2.85e-24	-12.0426	44.5443	-0.101	cg20157003	ANKRD45	NM_198493	173582288	173582411	NC_000001.10
cg13945749	1.57e-21	2.87e-24	-12.042	44.5401	-0.31	cg13945749			2866465	2866588	NC_000005.9
cg15445958	1.58e-21	2.89e-24	-12.0409	44.5332	-0.2	cg15445958			110266125	110266248	NC_000006.11
cg11837181	1.62e-21	2.98e-24	-12.0361	44.5031	-0.209	cg11837181	PRDM16;PRDM16	NM_022114;NM_199454	3001002	3001125	NC_000001.10
cg11794151	1.64e-21	3.01e-24	-12.0343	44.4914	-0.106	cg11794151	STK33	NM_030906	8544628	8544751	NC_000011.9
cg07340025	1.64e-21	3.02e-24	-12.0335	44.4868	-0.221	cg07340025			14926200	14926323	NC_000005.9
cg13876071	1.73e-21	3.19e-24	-12.0254	44.4355	-0.111	cg13876071			17927010	17927133	NC_000012.11
cg20696049	1.73e-21	3.19e-24	-12.025	44.433	-0.333	cg20696049	PTPRN2;PTPRN2;PTPRN2	NM_002847;NM_130842;NM_130843	157551890	157552013	NC_000007.13
cg07974025	1.73e-21	3.2e-24	-12.025	44.4327	-0.256	cg07974025	PRDM16;PRDM16	NM_022114;NM_199454	3150935	3151058	NC_000001.10
cg00825503	1.81e-21	3.36e-24	-12.017	44.3826	-0.0887	cg00825503			129594946	129595069	NC_000004.11
cg10309886	1.82e-21	3.38e-24	-12.0161	44.3766	-0.188	cg10309886	GNASAS	NR_002785	57407747	57407870	NC_000020.10
cg02610327	1.82e-21	3.39e-24	-12.029	44.3765	-0.109	cg02610327			44169592	44169715	NC_000004.11
cg04322486	1.83e-21	3.42e-24	-12.0143	44.3651	-0.279	cg04322486	VOPP1	NM_030796	55601226	55601349	NC_000007.13
cg08813325	1.83e-21	3.42e-24	-12.0142	44.365	-0.238	cg08813325	SORCS2	NM_020777	7699611	7699734	NC_000004.11
cg17922998	1.86e-21	3.49e-24	-12.0112	44.3459	-0.266	cg17922998			61863697	61863820	NC_000008.10
cg01702055	1.88e-21	3.52e-24	-12.0097	44.336	-0.217	cg01702055			13303065	13303188	NC_000006.11
cg08895013	1.89e-21	3.55e-24	-12.0086	44.3295	-0.262	cg08895013	KCNQ1	NM_000218	2468332	2468455	NC_000011.9
cg04135434	1.89e-21	3.55e-24	-12.0086	44.3291	-0.148	cg04135434	PTPRN2;PTPRN2;PTPRN2	NM_002847;NM_130842;NM_130843	157640163	157640286	NC_000007.13
cg06679878	1.98e-21	3.72e-24	-12.0011	44.2818	-0.234	cg06679878	TMEM132D	NM_133448	130335340	130335463	NC_000012.11
cg01094213	1.98e-21	3.74e-24	-12.0005	44.2783	-0.0983	cg01094213	DNAH3	NM_017539	21000183	21000306	NC_000016.9
cg02071267	2.01e-21	3.78e-24	-11.9985	44.2657	-0.097	cg02071267			32853952	32854075	NC_000016.9
cg10937408	2.06e-21	3.9e-24	-11.9939	44.2364	-0.286	cg10937408	HRNBP3	NM_001082575	77478569	77478692	NC_000017.10
cg07293387	2.11e-21	4.01e-24	-11.9893	44.2075	-0.0804	cg07293387	METT10D	NM_024086	2350487	2350610	NC_000017.10
cg00943060	2.11e-21	4.03e-24	-11.9889	44.2049	-0.0613	cg00943060			65211784	65211907	NC_000007.13
cg27376024	2.11e-21	4.03e-24	-11.9886	44.2029	-0.233	cg27376024	LGALS12;LGALS12;LGALS12;LGALS12;LGALS12;LGALS12	NM_001142535;NM_033101;NM_033101;NM_001142535;NM_001142536;NM_001142536	63273565	63273688	NC_000011.9
cg16303562	2.12e-21	4.06e-24	-11.9874	44.1957	-0.226	cg16303562	MSR1;MSR1;MSR1	NM_138715;NM_138716;NM_002445	16050333	16050456	NC_000008.10
cg26505052	2.13e-21	4.09e-24	-11.9864	44.1893	-0.117	cg26505052			94377225	94377348	NC_000011.9
cg02621151	2.13e-21	4.1e-24	-11.9862	44.1878	-0.251	cg02621151			3092997	3093120	NC_000005.9
cg23237276	2.15e-21	4.14e-24	-11.9846	44.1775	-0.225	cg23237276			101827449	101827572	NC_000014.8
cg15396734	2.15e-21	4.15e-24	-11.9843	44.1759	-0.154	cg15396734	FAM90A13;FAM90A14	NM_001164456;NM_001164452	7572749	7572872	NC_000008.10
cg05054531	2.16e-21	4.17e-24	-11.9835	44.1709	-0.286	cg05054531			132929737	132929860	NC_000012.11
cg00098029	2.18e-21	4.21e-24	-11.982	44.1615	-0.202	cg00098029			187984506	187984629	NC_000004.11
cg02104138	2.19e-21	4.24e-24	-11.9808	44.1539	-0.248	cg02104138			163187595	163187718	NC_000005.9
cg17564203	2.2e-21	4.27e-24	-11.9797	44.1471	-0.243	cg17564203	SORCS2	NM_020777	7526639	7526762	NC_000004.11
cg00308914	2.23e-21	4.33e-24	-11.9775	44.133	-0.227	cg00308914			17436715	17436838	NC_000005.9
cg26590079	2.26e-21	4.39e-24	-11.9755	44.12	-0.124	cg26590079			86036906	86037029	NC_000006.11
cg22677556	2.3e-21	4.47e-24	-11.9724	44.101	-0.208	cg22677556	TNFRSF1B	NM_001066	12238390	12238513	NC_000001.10
cg04016798	2.35e-21	4.58e-24	-11.9686	44.0765	-0.123	cg04016798	FILIP1	NM_015687	76151878	76152001	NC_000006.11
cg05609091	2.43e-21	4.74e-24	-11.9634	44.0437	-0.187	cg05609091	UGT1A10;UGT1A6;UGT1A3;UGT1A8;UGT1A4;UGT1A6;UGT1A9;UGT1A7;UGT1A5	NM_019075;NM_205862;NM_019093;NM_019076;NM_007120;NM_001072;NM_021027;NM_019077;NM_019078	234638269	234638392	NC_000002.11
ch.4.172823451R	2.43e-21	4.76e-24	-11.9758	44.0416	-0.141	ch.4.172823451R			172586876	172586999	NC_000004.11
cg06579154	2.45e-21	4.81e-24	-11.961	44.0288	-0.269	cg06579154	C10orf93	NM_173572	134752183	134752306	NC_000010.10
cg26886976	2.47e-21	4.85e-24	-11.9597	44.0206	-0.262	cg26886976	CD300LD;C17orf77	NM_001115152;NM_152460	72588412	72588535	NC_000017.10
cg05880248	2.55e-21	5.02e-24	-11.9545	43.9874	-0.248	cg05880248	GDF10	NM_004962	48432664	48432787	NC_000010.10
cg19451915	2.59e-21	5.1e-24	-11.952	43.9721	-0.233	cg19451915			52196709	52196832	NC_000007.13
cg17173369	2.6e-21	5.12e-24	-11.9514	43.9683	-0.267	cg17173369			169224099	169224222	NC_000006.11
ch.2.1904845F	2.61e-21	5.16e-24	-11.9502	43.9606	-0.14	ch.2.1904845F	POLR1A	NM_015425	86300378	86300501	NC_000002.11
cg08720786	2.62e-21	5.18e-24	-11.9494	43.9556	-0.161	cg08720786			48981581	48981704	NC_000010.10
cg16163382	2.67e-21	5.28e-24	-11.9466	43.938	-0.244	cg16163382			37938640	37938763	NC_000002.11
cg14462124	2.7e-21	5.35e-24	-11.9444	43.9241	-0.266	cg14462124	STK17B	NM_004226	197031748	197031871	NC_000002.11
cg17530841	2.71e-21	5.38e-24	-11.9435	43.9183	-0.0817	cg17530841			35265412	35265535	NC_000010.10
cg11552079	2.71e-21	5.39e-24	-11.9434	43.9174	-0.0889	cg11552079	PIK3C2G	NM_004570	18653849	18653972	NC_000012.11
cg03707955	2.75e-21	5.48e-24	-11.9407	43.9004	-0.267	cg03707955	RORA	NM_134261	61237076	61237199	NC_000015.9
cg07946977	2.76e-21	5.5e-24	-11.9402	43.8973	-0.276	cg07946977	DUSP10;DUSP10;DUSP10	NM_144728;NM_007207;NM_144729	221886639	221886762	NC_000001.10
cg12962542	2.8e-21	5.58e-24	-11.9378	43.882	-0.225	cg12962542	MECOM	NM_004991	169042374	169042497	NC_000003.11
cg15100535	2.83e-21	5.66e-24	-11.9357	43.8691	-0.12	cg15100535			134866137	134866260	NC_000002.11
cg08271622	2.84e-21	5.68e-24	-11.935	43.8647	-0.156	cg08271622	LOC388796;SNORA71B;LOC388796	NR_027241;NR_002910;NR_015366	37053969	37054092	NC_000020.10
cg02666257	2.87e-21	5.74e-24	-11.9333	43.854	-0.246	cg02666257	FLI1;FLI1	NM_002017;NM_001167681	128627260	128627383	NC_000011.9
cg16356630	2.92e-21	5.86e-24	-11.9301	43.8339	-0.0863	cg16356630	PDE3B	NM_000922	14683035	14683158	NC_000011.9
cg11271430	2.93e-21	5.89e-24	-11.9294	43.829	-0.218	cg11271430			187984718	187984841	NC_000004.11
cg04146553	2.93e-21	5.91e-24	-11.9288	43.8256	-0.0977	cg04146553	BLOC1S2;BLOC1S2	NM_001001342;NM_173809	102036858	102036981	NC_000010.10
cg23218535	3.02e-21	6.12e-24	-11.9364	43.7932	-0.0944	cg23218535			31057448	31057571	NC_000010.10
cg25820728	3.02e-21	6.11e-24	-11.9237	43.793	-0.235	cg25820728			1684706	1684829	NC_000007.13
cg25702651	3.02e-21	6.13e-24	-11.9232	43.7901	-0.254	cg25702651			192675515	192675638	NC_000003.11
cg05831907	3.07e-21	6.23e-24	-11.9205	43.7731	-0.14	cg05831907			100825168	100825291	NC_000012.11
cg09552983	3.13e-21	6.38e-24	-11.917	43.7511	-0.14	cg09552983			178578041	178578164	NC_000003.11
cg02245533	3.13e-21	6.39e-24	-11.9166	43.7486	-0.183	cg02245533			735913	736036	NC_000011.9
cg13410764	3.14e-21	6.42e-24	-11.9159	43.7439	-0.306	cg13410764			90407888	90408011	NC_000009.11
cg15077416	3.14e-21	6.43e-24	-11.9157	43.7427	-0.115	cg15077416	LRRC7	NM_020794	70354009	70354132	NC_000001.10
cg25372085	3.14e-21	6.44e-24	-11.9155	43.7416	-0.243	cg25372085			80528720	80528843	NC_000010.10
cg12857407	3.17e-21	6.49e-24	-11.9142	43.733	-0.326	cg12857407	MAGEA12;MAGEA12;MAGEA12;CSAG1;CSAG1	NM_005367;NM_001166387;NM_001166386;NM_001102576;NM_153478	151903194	151903317	NC_000023.10
cg12423493	3.17e-21	6.51e-24	-11.9138	43.7307	-0.187	cg12423493	FKBP2;FKBP2	NM_004470;NM_001135208	64007813	64007936	NC_000011.9
cg07502128	3.19e-21	6.54e-24	-11.913	43.7254	-0.116	cg07502128	REXO1L2P;REXO1L1	NR_003594;NM_172239	86573821	86573944	NC_000008.10
cg27216597	3.22e-21	6.62e-24	-11.9111	43.7134	-0.0996	cg27216597			30452900	30453023	NC_000010.10
cg05445137	3.27e-21	6.72e-24	-11.9088	43.6994	-0.103	cg05445137			65312403	65312526	NC_000016.9
cg13915179	3.29e-21	6.78e-24	-11.9075	43.6909	-0.23	cg13915179	PTPRN2;PTPRN2;PTPRN2	NM_002847;NM_130842;NM_130843	158038007	158038130	NC_000007.13
cg04234597	3.33e-21	6.87e-24	-11.9053	43.6768	-0.215	cg04234597			3851581	3851704	NC_000005.9
cg20412698	3.34e-21	6.88e-24	-11.905	43.6754	-0.0585	cg20412698			117098395	117098518	NC_000012.11
cg09160912	3.38e-21	6.99e-24	-11.9026	43.6603	-0.166	cg09160912			56882836	56882959	NC_000007.13
cg21767461	3.44e-21	7.12e-24	-11.8997	43.6418	-0.0967	cg21767461			21696286	21696409	NC_000011.9
cg14799696	3.48e-21	7.23e-24	-11.8974	43.6271	-0.223	cg14799696	PTPRN2;PTPRN2;PTPRN2	NM_002847;NM_130842;NM_130843	157571491	157571614	NC_000007.13
cg14942536	3.6e-21	7.49e-24	-11.8919	43.5925	-0.174	cg14942536	MIR134;MIR668;MIR382	NR_029698;NR_030408;NR_029874	101520169	101520292	NC_000014.8
cg03598287	3.6e-21	7.5e-24	-11.8917	43.5915	-0.102	cg03598287			123898032	123898155	NC_000012.11
cg18685330	3.6e-21	7.5e-24	-11.8916	43.5907	-0.225	cg18685330	WBSCR17	NM_022479	70746877	70747000	NC_000007.13
cg13158641	3.61e-21	7.53e-24	-11.8909	43.5864	-0.042	cg13158641			22071351	22071474	NC_000007.13
cg00055986	3.61e-21	7.54e-24	-11.8909	43.5863	-0.227	cg00055986			2537520	2537643	NC_000005.9
cg07250916	3.75e-21	7.87e-24	-11.8841	43.5433	-0.233	cg07250916	SMOC2;SMOC2	NM_022138;NM_001166412	168939666	168939789	NC_000006.11
cg24405700	3.75e-21	7.9e-24	-11.8836	43.5402	-0.248	cg24405700	B4GALNT3	NM_173593	655829	655952	NC_000012.11
cg16678111	3.76e-21	7.92e-24	-11.8832	43.5375	-0.246	cg16678111			2918724	2918847	NC_000001.10
cg02224372	3.77e-21	7.93e-24	-11.8829	43.5356	-0.216	cg02224372	SHANK2	NM_012309	70858695	70858818	NC_000011.9
cg17364913	3.77e-21	7.94e-24	-11.8827	43.5346	-0.266	cg17364913	PTPRN2;PTPRN2;PTPRN2	NM_002847;NM_130842;NM_130843	157396482	157396605	NC_000007.13
cg25691775	3.77e-21	7.96e-24	-11.8823	43.5319	-0.201	cg25691775	RAP1GAP2;RAP1GAP2	NM_001100398;NM_015085	2699122	2699245	NC_000017.10
cg23077606	3.78e-21	7.99e-24	-11.8818	43.5288	-0.245	cg23077606	SHANK2	NM_012309	70540206	70540329	NC_000011.9
cg16728539	3.79e-21	8.03e-24	-11.881	43.5239	-0.263	cg16728539	CACNA1C;CACNA1C;CACNA1C;CACNA1C;CACNA1C;CACNA1C;CACNA1C;CACNA1C;CACNA1C;CACNA1C;CACNA1C;CACNA1C;CACNA1C;CACNA1C;CACNA1C;CACNA1C;CACNA1C;CACNA1C;CACNA1C;CACNA1C;CACNA1C;CACNA1C;CACNA1C	NM_001129844;NM_001129827;NM_001129839;NM_001129834;NM_001129841;NM_000719;NM_001129830;NM_001167625;NM_001129843;NM_001167624;NM_001129835;NM_001129837;NM_001167623;NM_001129840;NM_199460;NM_001129833;NM_001129832;NM_001129829;NM_001129846;NM_001129836;NM_001129838;NM_001129831;NM_001129842	2451169	2451292	NC_000012.11
cg20147164	3.82e-21	8.11e-24	-11.8795	43.5141	-0.203	cg20147164	MYT1L	NM_015025	1879019	1879142	NC_000002.11
cg18604419	3.87e-21	8.21e-24	-11.8904	43.5036	-0.253	cg18604419	MIR889;MIR539	NR_030595;NR_030256	101513037	101513160	NC_000014.8
cg26283879	3.87e-21	8.23e-24	-11.8772	43.4998	-0.262	cg26283879			142255356	142255479	NC_000008.10
cg20434666	3.95e-21	8.4e-24	-11.8738	43.4785	-0.232	cg20434666	WDFY4	NM_020945	49893406	49893529	NC_000010.10
cg15061647	3.95e-21	8.42e-24	-11.8736	43.4771	-0.282	cg15061647	PTPRN2;PTPRN2;PTPRN2	NM_002847;NM_130842;NM_130843	158249209	158249332	NC_000007.13
cg15282281	4.03e-21	8.62e-24	-11.8698	43.4533	-0.243	cg15282281	MIR346;GRID1	NR_029907;NM_017551	88024557	88024680	NC_000010.10
cg26427498	4.04e-21	8.65e-24	-11.8694	43.4505	-0.268	cg26427498			105987258	105987381	NC_000007.13
cg01523316	4.04e-21	8.66e-24	-11.8691	43.4487	-0.0863	cg01523316			172585684	172585807	NC_000003.11
cg20972294	4.12e-21	8.85e-24	-11.8658	43.4278	-0.252	cg20972294	OPCML	NM_001012393	133005919	133006042	NC_000011.9
ch.2.123910862R	4.14e-21	8.9e-24	-11.8778	43.4243	-0.25	ch.2.123910862R			124194392	124194515	NC_000002.11
cg21380084	4.18e-21	9e-24	-11.8632	43.4113	-0.243	cg21380084	PTPRN2;PTPRN2;PTPRN2	NM_002847;NM_130842;NM_130843	157937891	157938014	NC_000007.13
cg03928384	4.3e-21	9.29e-24	-11.8582	43.3797	-0.217	cg03928384	CCR2;CCR2	NM_001123041;NM_001123396	46395191	46395314	NC_000003.11
cg13278350	4.3e-21	9.33e-24	-11.8576	43.3759	-0.207	cg13278350			155989444	155989567	NC_000007.13
cg01904393	4.36e-21	9.45e-24	-11.8556	43.3633	-0.244	cg01904393			51815083	51815206	NC_000012.11
cg03925208	4.36e-21	9.46e-24	-11.8553	43.3616	-0.155	cg03925208	HNRNPCL1;LOC649330	NM_001013631;NM_001146181	12907868	12907991	NC_000001.10
cg22263031	4.37e-21	9.48e-24	-11.855	43.3592	-0.267	cg22263031			97323948	97324071	NC_000015.9
cg22718111	4.44e-21	9.67e-24	-11.8519	43.3399	-0.106	cg22718111			32793507	32793630	NC_000007.13
cg21177713	4.52e-21	9.87e-24	-11.8487	43.3201	-0.177	cg21177713			105365742	105365865	NC_000009.11
cg24044052	4.52e-21	9.9e-24	-11.8482	43.3169	-0.195	cg24044052	SP140L	NM_138402	231191662	231191785	NC_000002.11
cg05023447	4.54e-21	9.94e-24	-11.8476	43.3129	-0.136	cg05023447	RBM14	NM_006328	66385435	66385558	NC_000011.9
cg17727071	4.7e-21	1.03e-23	-11.8417	43.2758	-0.191	cg17727071	COBL	NM_015198	51170073	51170196	NC_000007.13
cg06243452	4.74e-21	1.04e-23	-11.84	43.2652	-0.0747	cg06243452			127701963	127702086	NC_000006.11
cg22058467	4.75e-21	1.05e-23	-11.8398	43.2636	-0.0429	cg22058467			174903919	174904042	NC_000002.11
cg11403261	4.75e-21	1.05e-23	-11.8397	43.2627	-0.0943	cg11403261			32515069	32515192	NC_000006.11
cg13018120	4.83e-21	1.07e-23	-11.8368	43.2448	-0.214	cg13018120	CD300E	NM_181449	72619962	72620085	NC_000017.10
ch.9.2223115R	4.83e-21	1.07e-23	-11.8492	43.2447	-0.163	ch.9.2223115R			2233115	2233238	NC_000009.11
cg12530994	4.83e-21	1.07e-23	-11.8361	43.2401	-0.274	cg12530994	AKR1C3	NM_003739	5136782	5136905	NC_000010.10
cg00134295	4.84e-21	1.07e-23	-11.8357	43.2379	-0.267	cg00134295	A2M	NM_000014	9269178	9269301	NC_000012.11
cg05224015	4.86e-21	1.08e-23	-11.835	43.2331	-0.263	cg05224015	PTPRN2;PTPRN2;PTPRN2	NM_002847;NM_130842;NM_130843	158235423	158235546	NC_000007.13
ch.3.1226245F	4.88e-21	1.08e-23	-11.834	43.2273	-0.174	ch.3.1226245F	ERC2	NM_015576	55731563	55731686	NC_000003.11
cg07099241	4.89e-21	1.09e-23	-11.8336	43.2246	-0.083	cg07099241			92491486	92491609	NC_000001.10
cg11673505	4.9e-21	1.09e-23	-11.8331	43.2213	-0.123	cg11673505	ELMO1;ELMO1;ELMO1	NM_001039459;NM_014800;NM_130442	37014447	37014570	NC_000007.13
cg08490356	4.96e-21	1.1e-23	-11.8312	43.2096	-0.173	cg08490356			977626	977749	NC_000008.10
cg24644436	5.09e-21	1.14e-23	-11.8265	43.1795	-0.194	cg24644436	PAOX;PAOX;PAOX	NM_207128;NM_152911;NM_207127	135202906	135203029	NC_000010.10
cg04756287	5.11e-21	1.14e-23	-11.8258	43.1752	-0.108	cg04756287			86778866	86778989	NC_000016.9
cg04038759	5.12e-21	1.15e-23	-11.8253	43.1721	-0.179	cg04038759	C20orf151	NM_080833	60992716	60992839	NC_000020.10
cg00110545	5.15e-21	1.16e-23	-11.8241	43.1645	-0.24	cg00110545			6625489	6625612	NC_000010.10
cg21033171	5.16e-21	1.16e-23	-11.8237	43.1619	-0.159	cg21033171			2585096	2585219	NC_000002.11
cg16532400	5.16e-21	1.16e-23	-11.8236	43.1611	-0.223	cg16532400	GIMAP7	NM_153236	150217056	150217179	NC_000007.13
cg20540370	5.17e-21	1.16e-23	-11.823	43.1573	-0.15	cg20540370			63221680	63221803	NC_000007.13
cg20109001	5.17e-21	1.17e-23	-11.8227	43.1556	-0.155	cg20109001	EPHB1	NM_004441	134611847	134611970	NC_000003.11
cg03252313	5.17e-21	1.17e-23	-11.8224	43.154	-0.242	cg03252313	CNTNAP2	NM_014141	148117075	148117198	NC_000007.13
cg10575547	5.22e-21	1.18e-23	-11.8726	43.1504	-0.23	cg10575547	TRERF1	NM_033502	42283846	42283969	NC_000006.11
cg07989373	5.22e-21	1.18e-23	-11.8204	43.1413	-0.0842	cg07989373			50076374	50076497	NC_000015.9
cg06367135	5.26e-21	1.19e-23	-11.8191	43.1329	-0.236	cg06367135	PRDM16;PRDM16	NM_022114;NM_199454	3077835	3077958	NC_000001.10
cg24657816	5.28e-21	1.2e-23	-11.8184	43.1284	-0.139	cg24657816			1140440	1140563	NC_000004.11
ch.6.169008488F	5.3e-21	1.2e-23	-11.8176	43.1233	-0.17	ch.6.169008488F			169266563	169266686	NC_000006.11
cg26733224	5.3e-21	1.21e-23	-11.8174	43.1222	-0.198	cg26733224			61675505	61675628	NC_000020.10
cg20848441	5.3e-21	1.21e-23	-11.8172	43.1211	-0.214	cg20848441			2805150	2805273	NC_000001.10
cg18110419	5.4e-21	1.23e-23	-11.8139	43.1001	-0.0966	cg18110419	FLJ45445	NR_028324	200092	200215	NC_000019.9
cg10592734	5.45e-21	1.25e-23	-11.8118	43.0872	-0.217	cg10592734	TBXAS1;TBXAS1;TBXAS1;TBXAS1;TBXAS1;TBXAS1	NM_001166253;NR_029394;NM_001130966;NM_001061;NM_030984;NM_001166254	139570596	139570719	NC_000007.13
cg26932790	5.47e-21	1.26e-23	-11.8109	43.0813	-0.192	cg26932790	RRN3P1	NR_003370	21813670	21813793	NC_000016.9
cg10959950	5.49e-21	1.26e-23	-11.8101	43.0759	-0.219	cg10959950	LIFR;LIFR	NM_001127671;NM_002310	38535574	38535697	NC_000005.9
cg14742211	5.51e-21	1.27e-23	-11.8094	43.0718	-0.22	cg14742211	CLCNKA;CLCNKA	NM_004070;NM_001042704	16348397	16348520	NC_000001.10
cg21499006	5.52e-21	1.27e-23	-11.809	43.0695	-0.178	cg21499006	TBC1D28	NM_001039397	18541544	18541667	NC_000017.10
cg20168495	5.59e-21	1.29e-23	-11.807	43.0565	-0.225	cg20168495			148283066	148283189	NC_000004.11
ch.10.80061816F	5.6e-21	1.29e-23	-11.8064	43.0528	-0.203	ch.10.80061816F			80391810	80391933	NC_000010.10
cg16035002	5.67e-21	1.31e-23	-11.8044	43.0403	-0.0801	cg16035002			117544334	117544457	NC_000008.10
cg27016114	5.67e-21	1.31e-23	-11.8167	43.0399	-0.12	cg27016114			101712466	101712589	NC_000014.8
cg26574460	5.68e-21	1.32e-23	-11.8035	43.0347	-0.105	cg26574460	THEM4	NM_053055	151879740	151879863	NC_000001.10
cg22437586	5.74e-21	1.33e-23	-11.8018	43.0237	-0.207	cg22437586			21865792	21865915	NC_000002.11
cg25738326	5.8e-21	1.35e-23	-11.8	43.0123	-0.246	cg25738326			75463903	75464026	NC_000015.9
cg06060962	5.88e-21	1.37e-23	-11.7976	42.9971	-0.0687	cg06060962			32515150	32515273	NC_000006.11
cg20141434	5.91e-21	1.38e-23	-11.7967	42.9917	-0.194	cg20141434	REXO1L2P	NR_003594	86568078	86568201	NC_000008.10
cg11344530	6.04e-21	1.41e-23	-11.793	42.9685	-0.111	cg11344530			39113155	39113278	NC_000001.10
cg10009757	6.11e-21	1.43e-23	-11.7911	42.9562	-0.206	cg10009757	HRNBP3	NM_001082575	77207289	77207412	NC_000017.10
cg13096708	6.25e-21	1.47e-23	-11.787	42.9302	-0.0826	cg13096708	TOP3A	NM_004618	18201421	18201544	NC_000017.10
ch.18.310800R	6.31e-21	1.48e-23	-11.7854	42.92	-0.212	ch.18.310800R	CEP192	NM_032142	13050953	13051076	NC_000018.9
cg01858458	6.43e-21	1.51e-23	-11.7818	42.8977	-0.082	cg01858458	C6orf10	NM_006781	32296549	32296672	NC_000006.11
cg16104584	6.48e-21	1.53e-23	-11.7804	42.8885	-0.204	cg16104584	SLC2A5	NR_024180	9149734	9149857	NC_000001.10
cg16109680	6.64e-21	1.57e-23	-11.776	42.8613	-0.228	cg16109680	CADM3;CADM3	NM_001127173;NM_021189	159161344	159161467	NC_000001.10
cg20882260	6.64e-21	1.57e-23	-11.7759	42.8603	-0.227	cg20882260	CACNA1C;CACNA1C;CACNA1C;CACNA1C;CACNA1C;CACNA1C;CACNA1C;CACNA1C;CACNA1C;CACNA1C;CACNA1C;CACNA1C;CACNA1C;CACNA1C;CACNA1C;CACNA1C;CACNA1C;CACNA1C;CACNA1C;CACNA1C;CACNA1C;CACNA1C;CACNA1C	NM_001129844;NM_001129827;NM_001129839;NM_001129834;NM_001129841;NM_000719;NM_001129830;NM_001167625;NM_001129843;NM_001167624;NM_001129835;NM_001129837;NM_001167623;NM_001129840;NM_199460;NM_001129833;NM_001129832;NM_001129829;NM_001129846;NM_001129836;NM_001129838;NM_001129831;NM_001129842	2374427	2374550	NC_000012.11
cg04904527	6.88e-21	1.64e-23	-11.7693	42.819	-0.0957	cg04904527			27027065	27027188	NC_000015.9
cg14962447	6.96e-21	1.66e-23	-11.7675	42.8076	-0.0763	cg14962447	SNORD56B	NR_001276	71864793	71864916	NC_000014.8
cg03749154	6.96e-21	1.66e-23	-11.7674	42.8066	-0.199	cg03749154			31155158	31155281	NC_000001.10
cg23999080	7.08e-21	1.69e-23	-11.7645	42.7887	-0.227	cg23999080	PRDM16;PRDM16	NM_022114;NM_199454	3319264	3319387	NC_000001.10
cg06121808	7.12e-21	1.7e-23	-11.7635	42.7818	-0.253	cg06121808	SLC20A1	NM_005415	113404678	113404801	NC_000002.11
cg05579861	7.17e-21	1.72e-23	-11.7623	42.7744	-0.207	cg05579861	PTPRN2;PTPRN2;PTPRN2	NM_002847;NM_130842;NM_130843	157631040	157631163	NC_000007.13
cg07173274	7.35e-21	1.77e-23	-11.7577	42.7458	-0.127	cg07173274			4167004	4167127	NC_000004.11
cg11374656	7.41e-21	1.78e-23	-11.7563	42.7369	-0.223	cg11374656	PTPRN2;PTPRN2;PTPRN2	NM_002847;NM_130842;NM_130843	157981333	157981456	NC_000007.13
cg12810800	7.41e-21	1.78e-23	-11.7561	42.7356	-0.248	cg12810800			159788345	159788468	NC_000002.11
cg06442472	7.42e-21	1.79e-23	-11.7558	42.7334	-0.105	cg06442472			108253163	108253286	NC_000008.10
cg22511877	7.64e-21	1.85e-23	-11.7507	42.7011	-0.313	cg22511877	MYT1L	NM_015025	1942942	1943065	NC_000002.11
cg25132782	7.64e-21	1.85e-23	-11.7506	42.7009	-0.222	cg25132782			84047082	84047205	NC_000015.9
cg06079495	7.68e-21	1.86e-23	-11.7496	42.6946	-0.269	cg06079495			119599940	119600063	NC_000010.10
cg06504331	7.73e-21	1.87e-23	-11.7484	42.687	-0.0773	cg06504331			100735481	100735604	NC_000007.13
cg13987334	7.78e-21	1.89e-23	-11.7473	42.6798	-0.117	cg13987334			76293719	76293842	NC_000011.9
cg19605592	7.81e-21	1.9e-23	-11.7465	42.6747	-0.085	cg19605592			7882922	7883045	NC_000011.9
cg12769118	7.9e-21	1.92e-23	-11.757	42.6644	-0.231	cg12769118	C1orf150	NM_145278	247712377	247712500	NC_000001.10
cg24413842	8.02e-21	1.96e-23	-11.7415	42.6434	-0.264	cg24413842	GIMAP7	NM_153236	150211820	150211943	NC_000007.13
cg00732878	8.08e-21	1.98e-23	-11.7402	42.6354	-0.194	cg00732878			2654357	2654480	NC_000002.11
cg03637007	8.09e-21	1.98e-23	-11.74	42.6339	-0.194	cg03637007			86548232	86548355	NC_000006.11
cg14191953	8.29e-21	2.03e-23	-11.7357	42.607	-0.157	cg14191953			107048701	107048824	NC_000014.8
cg03059073	8.32e-21	2.04e-23	-11.735	42.6022	-0.278	cg03059073			150130708	150130831	NC_000007.13
cg02567344	8.71e-21	2.14e-23	-11.7275	42.5552	-0.0828	cg02567344	FAM20B	NM_014864	179010239	179010362	NC_000001.10
cg14857193	8.72e-21	2.15e-23	-11.7273	42.5538	-0.198	cg14857193	ALDH1L1	NM_012190	125852009	125852132	NC_000003.11
cg10041417	8.8e-21	2.17e-23	-11.7257	42.5438	-0.243	cg10041417	SMOC2;SMOC2	NM_022138;NM_001166412	168920947	168921070	NC_000006.11
cg12022621	9.16e-21	2.26e-23	-11.7193	42.5031	-0.195	cg12022621	LAX1;LAX1;LAX1	NM_017773;NM_001136190;NM_017773	203734505	203734628	NC_000001.10
cg20496061	9.17e-21	2.26e-23	-11.7188	42.5004	-0.135	cg20496061			107210949	107211072	NC_000014.8
cg18757155	9.26e-21	2.29e-23	-11.7169	42.4883	-0.154	cg18757155	ADAM28;ADAM28	NM_014265;NM_021777	24151472	24151595	NC_000008.10
cg01067405	9.26e-21	2.3e-23	-11.7167	42.4868	-0.242	cg01067405	LILRA4;LILRA4	NM_012276;NM_012276	54850417	54850540	NC_000019.9
cg11911550	9.42e-21	2.34e-23	-11.7136	42.4677	-0.219	cg11911550			39716771	39716894	NC_000005.9
cg04017276	9.42e-21	2.34e-23	-11.7136	42.4671	-0.265	cg04017276	PARVG;PARVG;PARVG;PARVG;PARVG;PARVG	NM_001137605;NR_024427;NM_001137606;NR_024428;NR_024426;NM_022141	44577135	44577258	NC_000022.10
cg18676488	9.42e-21	2.35e-23	-11.7133	42.4656	-0.0954	cg18676488	BDP1	NM_018429	70848105	70848228	NC_000005.9
cg18424101	9.59e-21	2.39e-23	-11.7105	42.448	-0.0758	cg18424101	PTPRN2;PTPRN2;PTPRN2	NM_002847;NM_130842;NM_130843	158072443	158072566	NC_000007.13
ch.14.96436874F	9.63e-21	2.4e-23	-11.7097	42.4427	-0.153	ch.14.96436874F			97367121	97367244	NC_000014.8
cg11919577	9.88e-21	2.47e-23	-11.7053	42.4148	-0.245	cg11919577	SAMD12	NM_001101676	119291748	119291871	NC_000008.10
cg06812760	9.9e-21	2.48e-23	-11.7172	42.4143	-0.18	cg06812760			132909623	132909746	NC_000012.11
cg08932994	1e-20	2.52e-23	-11.7022	42.3958	-0.0619	cg08932994	SUGT1L1	NR_003365	41474146	41474269	NC_000013.10
cg10836082	1.03e-20	2.59e-23	-11.6979	42.3683	-0.0898	cg10836082			87994406	87994529	NC_000001.10
cg26484426	1.04e-20	2.61e-23	-11.6967	42.361	-0.193	cg26484426			132580880	132581003	NC_000010.10
cg02198625	1.07e-20	2.69e-23	-11.6922	42.3322	-0.242	cg02198625	SIRPB1;SIRPB1;SIRPB1;SIRPB1;SIRPB1;SIRPB1	NM_001135844;NM_001083910;NM_001135844;NM_001083910;NM_006065;NM_006065	1600641	1600764	NC_000020.10
cg09611620	1.07e-20	2.69e-23	-11.6922	42.3321	-0.238	cg09611620	FOXP1;FOXP1	NM_032682;NM_001012505	71545533	71545656	NC_000003.11
cg24654228	1.07e-20	2.71e-23	-11.6909	42.3242	-0.0651	cg24654228	ZC3HAV1;ZC3HAV1	NM_020119;NM_024625	138785850	138785973	NC_000007.13
cg09881716	1.08e-20	2.73e-23	-11.6898	42.3173	-0.117	cg09881716			26476474	26476597	NC_000005.9
ch.6.2925136R	1.08e-20	2.74e-23	-11.689	42.3123	-0.165	ch.6.2925136R	MTHFD1L	NM_015440	151283923	151284046	NC_000006.11
cg18899802	1.09e-20	2.77e-23	-11.6874	42.3021	-0.0645	cg18899802			9226457	9226580	NC_000010.10
cg13107810	1.11e-20	2.81e-23	-11.6851	42.2876	-0.0851	cg13107810			233531418	233531541	NC_000001.10
cg05262755	1.11e-20	2.83e-23	-11.6841	42.2815	-0.182	cg05262755			143645073	143645196	NC_000008.10
cg24395386	1.12e-20	2.83e-23	-11.6838	42.2793	-0.201	cg24395386	PRDM16;PRDM16	NM_022114;NM_199454	3328593	3328716	NC_000001.10
cg07956751	1.12e-20	2.85e-23	-11.683	42.2744	-0.196	cg07956751	GIMAP7	NM_153236	150211939	150212062	NC_000007.13
cg26721759	1.13e-20	2.87e-23	-11.6819	42.2673	-0.242	cg26721759			133616965	133617088	NC_000011.9
cg23373401	1.15e-20	2.93e-23	-11.6785	42.2462	-0.237	cg23373401	RIMBP2	NM_015347	130936355	130936478	NC_000012.11
cg16595269	1.16e-20	2.96e-23	-11.6771	42.2373	-0.07	cg16595269			129914264	129914387	NC_000011.9
cg22912156	1.17e-20	2.99e-23	-11.6754	42.2267	-0.22	cg22912156	ADARB2	NM_018702	1520952	1521075	NC_000010.10
cg04659689	1.18e-20	3.04e-23	-11.673	42.2111	-0.276	cg04659689			2903377	2903500	NC_000007.13
cg07856521	1.2e-20	3.09e-23	-11.6702	42.1937	-0.27	cg07856521	CALN1;CALN1	NM_001017440;NM_031468	71799177	71799300	NC_000007.13
cg14614689	1.21e-20	3.11e-23	-11.6694	42.1884	-0.228	cg14614689	TCERG1L	NM_174937	133019987	133020110	NC_000010.10
cg04310063	1.21e-20	3.13e-23	-11.6683	42.1816	-0.241	cg04310063	SLC35F3	NM_173508	234342613	234342736	NC_000001.10
cg02468320	1.23e-20	3.17e-23	-11.6664	42.17	-0.29	cg02468320	CACNA1C;CACNA1C;CACNA1C;CACNA1C;CACNA1C;CACNA1C;CACNA1C;CACNA1C;CACNA1C;CACNA1C;CACNA1C;CACNA1C;CACNA1C;CACNA1C;CACNA1C;CACNA1C;CACNA1C;CACNA1C;CACNA1C;CACNA1C;CACNA1C;CACNA1C;CACNA1C	NM_001129844;NM_001129827;NM_001129839;NM_001129834;NM_001129841;NM_000719;NM_001129830;NM_001167625;NM_001129843;NM_001167624;NM_001129835;NM_001129837;NM_001167623;NM_001129840;NM_199460;NM_001129833;NM_001129832;NM_001129829;NM_001129846;NM_001129836;NM_001129838;NM_001129831;NM_001129842	2404134	2404257	NC_000012.11
cg03533091	1.24e-20	3.19e-23	-11.6651	42.1617	-0.162	cg03533091			3614086	3614209	NC_000011.9
cg26664737	1.25e-20	3.24e-23	-11.6629	42.1479	-0.0961	cg26664737	SLC16A7	NM_004731	60145067	60145190	NC_000012.11
cg14941559	1.26e-20	3.25e-23	-11.6746	42.1464	-0.0759	cg14941559	NCK1	NM_006153	136608208	136608331	NC_000003.11
cg01260502	1.27e-20	3.3e-23	-11.6601	42.1299	-0.181	cg01260502	GIMAP7	NM_153236	150217081	150217204	NC_000007.13
cg04399631	1.32e-20	3.44e-23	-11.6657	42.0903	-0.215	cg04399631			12269362	12269485	NC_000003.11
cg03447880	1.32e-20	3.44e-23	-11.6537	42.0894	-0.256	cg03447880	ADCYAP1R1	NM_001118	31121827	31121950	NC_000007.13
ch.1.117057666F	1.32e-20	3.45e-23	-11.6529	42.0845	-0.137	ch.1.117057666F			117256143	117256266	NC_000001.10
cg26531665	1.33e-20	3.48e-23	-11.6517	42.0771	-0.0858	cg26531665			226613372	226613495	NC_000001.10
cg05482413	1.33e-20	3.48e-23	-11.6515	42.0756	-0.22	cg05482413	MOXD2	NR_024346	141940591	141940714	NC_000007.13
cg16282618	1.34e-20	3.52e-23	-11.65	42.0662	-0.265	cg16282618			129444501	129444624	NC_000011.9
cg19009471	1.36e-20	3.57e-23	-11.6478	42.0527	-0.261	cg19009471			101908998	101909121	NC_000014.8
cg27233997	1.36e-20	3.59e-23	-11.647	42.0474	-0.0893	cg27233997	EPHA6;EPHA6	NM_173655;NM_001080448	97360444	97360567	NC_000003.11
cg02627966	1.37e-20	3.59e-23	-11.6466	42.0451	-0.24	cg02627966			54899537	54899660	NC_000007.13
cg17582466	1.4e-20	3.7e-23	-11.642	42.0157	-0.0802	cg17582466			125042244	125042367	NC_000010.10
cg16570507	1.42e-20	3.76e-23	-11.6397	42.0014	-0.255	cg16570507	MIR346;GRID1	NR_029907;NM_017551	88024598	88024721	NC_000010.10
cg06778183	1.44e-20	3.83e-23	-11.6487	41.9836	-0.238	cg06778183	MCTP1;MCTP1	NM_024717;NM_001002796	94129156	94129279	NC_000005.9
cg21677594	1.44e-20	3.83e-23	-11.6368	41.9831	-0.0816	cg21677594	DLAT	NM_001931	111897956	111898079	NC_000011.9
cg02989244	1.46e-20	3.88e-23	-11.6344	41.9683	-0.256	cg02989244			28657270	28657393	NC_000010.10
cg14212852	1.47e-20	3.91e-23	-11.6336	41.9627	-0.0778	cg14212852	KCNMB3;KCNMB3	NM_001163677;NM_171828	178980938	178981061	NC_000003.11
cg26026748	1.48e-20	3.96e-23	-11.6316	41.9501	-0.206	cg26026748	PBX1	NM_002585	164629875	164629998	NC_000001.10
cg03848483	1.49e-20	3.96e-23	-11.6312	41.948	-0.156	cg03848483			85969392	85969515	NC_000016.9
cg01239704	1.49e-20	3.99e-23	-11.6304	41.9426	-0.251	cg01239704	PTPRN2;PTPRN2;PTPRN2	NM_002847;NM_130842;NM_130843	157605569	157605692	NC_000007.13
cg04351185	1.52e-20	4.06e-23	-11.6398	41.9272	-0.101	cg04351185			143120546	143120669	NC_000007.13
cg02530656	1.55e-20	4.15e-23	-11.624	41.9026	-0.227	cg02530656			112324767	112324890	NC_000013.10
cg07637837	1.58e-20	4.23e-23	-11.6212	41.885	-0.331	cg07637837	MBP;MBP	NM_001025101;NM_001025100	74824154	74824277	NC_000018.9
cg06457633	1.59e-20	4.25e-23	-11.6202	41.8784	-0.259	cg06457633	APBB1IP	NM_019043	26726877	26727000	NC_000010.10
cg12152540	1.59e-20	4.27e-23	-11.6316	41.8758	-0.194	cg12152540	MKX	NM_173576	28027746	28027869	NC_000010.10
cg10523494	1.6e-20	4.28e-23	-11.6313	41.8738	-0.164	cg10523494	CD300LB	NM_174892	72528386	72528509	NC_000017.10
cg07985589	1.61e-20	4.35e-23	-11.629	41.8594	-0.162	cg07985589	OPCML	NM_001012393	133229994	133230117	NC_000011.9
cg14112449	1.61e-20	4.34e-23	-11.6172	41.8593	-0.138	cg14112449			142560774	142560897	NC_000008.10
cg04611407	1.61e-20	4.35e-23	-11.6168	41.8569	-0.0696	cg04611407	CDK14	NM_012395	90803099	90803222	NC_000007.13
cg21539981	1.62e-20	4.38e-23	-11.6155	41.8491	-0.293	cg21539981			58106094	58106217	NC_000008.10
cg02153334	1.63e-20	4.4e-23	-11.6271	41.8474	-0.19	cg02153334	TERT;TERT	NM_198255;NM_198253	1290773	1290896	NC_000005.9
cg24663971	1.63e-20	4.4e-23	-11.6148	41.8447	-0.236	cg24663971			106410668	106410791	NC_000014.8
cg18677996	1.64e-20	4.44e-23	-11.6133	41.8353	-0.0764	cg18677996			17031869	17031992	NC_000005.9
cg27450010	1.64e-20	4.45e-23	-11.6131	41.8339	-0.233	cg27450010	LDB2;LDB2	NM_001290;NM_001130834	16639181	16639304	NC_000004.11
cg10559416	1.64e-20	4.46e-23	-11.6129	41.8325	-0.261	cg10559416	CYTIP	NM_004288	158300485	158300608	NC_000002.11
cg23710611	1.65e-20	4.48e-23	-11.6121	41.8277	-0.25	cg23710611	DAB1	NM_021080	58098908	58099031	NC_000001.10
cg13845133	1.67e-20	4.53e-23	-11.6104	41.8165	-0.204	cg13845133	PBX1	NM_002585	164544496	164544619	NC_000001.10
cg11334728	1.69e-20	4.6e-23	-11.6081	41.802	-0.169	cg11334728	GALNT9	NM_001122636	132697723	132697846	NC_000012.11
cg07479750	1.71e-20	4.66e-23	-11.6061	41.7897	-0.187	cg07479750	PRAMEF11	NM_001146344	12888853	12888976	NC_000001.10
cg18682226	1.72e-20	4.69e-23	-11.605	41.7829	-0.241	cg18682226	CALN1;CALN1	NM_001017440;NM_031468	71798428	71798551	NC_000007.13
cg01190484	1.74e-20	4.75e-23	-11.603	41.7699	-0.229	cg01190484	TRIM40;TRIM40	NM_138700;NM_138700	30104593	30104716	NC_000006.11
cg01049316	1.74e-20	4.77e-23	-11.6023	41.7659	-0.0693	cg01049316			179805268	179805391	NC_000001.10
cg05166028	1.76e-20	4.81e-23	-11.613	41.7588	-0.256	cg05166028	PTPRN2;PTPRN2;PTPRN2	NM_002847;NM_130842;NM_130843	157622138	157622261	NC_000007.13
cg03806501	1.76e-20	4.83e-23	-11.6004	41.7537	-0.195	cg03806501			81130829	81130952	NC_000007.13
cg13156014	1.78e-20	4.89e-23	-11.5985	41.7415	-0.132	cg13156014			219917079	219917202	NC_000002.11
cg27448496	1.78e-20	4.89e-23	-11.5984	41.7411	-0.0963	cg27448496			130868409	130868532	NC_000010.10
cg07834069	1.81e-20	4.97e-23	-11.5959	41.7254	-0.252	cg07834069	CD300LB	NM_174892	72524918	72525041	NC_000017.10
cg24838949	1.81e-20	4.98e-23	-11.5955	41.7226	-0.283	cg24838949			155897436	155897559	NC_000007.13
cg01966974	1.81e-20	5e-23	-11.595	41.7195	-0.196	cg01966974			212830395	212830518	NC_000001.10
cg04167811	1.82e-20	5.02e-23	-11.5943	41.7154	-0.206	cg04167811			65152945	65153068	NC_000008.10
cg03677924	1.83e-20	5.05e-23	-11.5935	41.71	-0.17	cg03677924	MIP	NM_012064	56849618	56849741	NC_000012.11
cg22588983	1.87e-20	5.19e-23	-11.5892	41.6829	-0.241	cg22588983			38783142	38783265	NC_000005.9
cg04396850	1.87e-20	5.19e-23	-11.589	41.682	-0.16	cg04396850			127256977	127257100	NC_000012.11
cg09474625	1.87e-20	5.21e-23	-11.5886	41.6792	-0.0882	cg09474625			62877819	62877942	NC_000005.9
cg16279237	1.88e-20	5.24e-23	-11.5875	41.6724	-0.254	cg16279237			106174668	106174791	NC_000014.8
cg15768650	1.88e-20	5.25e-23	-11.5992	41.6723	-0.106	cg15768650			64937320	64937443	NC_000012.11
cg12292953	1.91e-20	5.34e-23	-11.5847	41.6547	-0.0619	cg12292953			32499860	32499983	NC_000006.11
cg11417319	1.91e-20	5.35e-23	-11.5843	41.6525	-0.171	cg11417319	PTPRN2;PTPRN2;PTPRN2	NM_002847;NM_130842;NM_130843	157441657	157441780	NC_000007.13
cg27542314	1.95e-20	5.45e-23	-11.5813	41.6333	-0.0898	cg27542314			118154109	118154232	NC_000010.10
cg15446845	1.96e-20	5.48e-23	-11.5805	41.6285	-0.252	cg15446845			5470909	5471032	NC_000003.11
cg27400313	1.97e-20	5.54e-23	-11.579	41.6188	-0.274	cg27400313	MBP;MBP	NM_001025101;NM_001025100	74824280	74824403	NC_000018.9
cg11666534	1.99e-20	5.57e-23	-11.578	41.6128	-0.251	cg11666534	IGLL1;IGLL1	NM_020070;NM_152855	23922551	23922674	NC_000022.10
cg01951963	2.03e-20	5.7e-23	-11.5744	41.5899	-0.233	cg01951963	IRF8	NM_002163	85942346	85942469	NC_000016.9
cg12177677	2.05e-20	5.77e-23	-11.5724	41.5771	-0.24	cg12177677	CYTIP	NM_004288	158300475	158300598	NC_000002.11
cg21400802	2.06e-20	5.81e-23	-11.5713	41.5705	-0.228	cg21400802	PGLYRP4	NM_020393	153312501	153312624	NC_000001.10
cg03437887	2.07e-20	5.83e-23	-11.571	41.5683	-0.259	cg03437887			22605688	22605811	NC_000002.11
ch.1.4190055F	2.08e-20	5.86e-23	-11.582	41.5644	-0.134	ch.1.4190055F	CENPF	NM_016343	214818353	214818476	NC_000001.10
cg19486673	2.09e-20	5.9e-23	-11.5691	41.5564	-0.236	cg19486673	LILRA2;LILRA2	NM_001130917;NM_006866	55085018	55085141	NC_000019.9
cg09693588	2.09e-20	5.9e-23	-11.5689	41.5552	-0.214	cg09693588			66633255	66633378	NC_000003.11
cg16197857	2.1e-20	5.93e-23	-11.5681	41.5504	-0.204	cg16197857			75402282	75402405	NC_000018.9
cg05085267	2.14e-20	6.06e-23	-11.5647	41.5289	-0.102	cg05085267			147160541	147160664	NC_000002.11
ch.2.71774667F	2.15e-20	6.09e-23	-11.5639	41.5239	-0.213	ch.2.71774667F			71921159	71921282	NC_000002.11
cg13823492	2.17e-20	6.18e-23	-11.5619	41.5108	-0.253	cg13823492	ZNF365;ZNF365	NM_199452;NM_199451	64397076	64397199	NC_000010.10
cg19315730	2.18e-20	6.2e-23	-11.5612	41.507	-0.18	cg19315730			49320210	49320333	NC_000004.11
cg07424132	2.19e-20	6.22e-23	-11.5608	41.504	-0.097	cg07424132			20246488	20246611	NC_000012.11
ch.4.3479505R	2.2e-20	6.25e-23	-11.56	41.4993	-0.188	ch.4.3479505R			187839728	187839851	NC_000004.11
cg24169915	2.24e-20	6.39e-23	-11.5566	41.4775	-0.255	cg24169915	C14orf177;C14orf177	NM_182560;NM_182560	99177987	99178110	NC_000014.8
cg09536426	2.28e-20	6.51e-23	-11.5536	41.4587	-0.168	cg09536426			49441006	49441129	NC_000016.9
cg17117459	2.3e-20	6.57e-23	-11.5521	41.4495	-0.286	cg17117459	PARP4	NM_006437	25085405	25085528	NC_000013.10
cg05762326	2.35e-20	6.74e-23	-11.5481	41.4239	-0.111	cg05762326	HTR7;HTR7;HTR7	NM_019860;NM_000872;NM_019859	92591168	92591291	NC_000010.10
cg22533724	2.4e-20	6.89e-23	-11.5448	41.4032	-0.102	cg22533724			155760176	155760299	NC_000003.11
cg16669468	2.4e-20	6.9e-23	-11.5563	41.4028	-0.0706	cg16669468			76588012	76588135	NC_000007.13
cg20717077	2.46e-20	7.1e-23	-11.5399	41.3728	-0.0987	cg20717077			4834269	4834392	NC_000007.13
cg06977014	2.46e-20	7.11e-23	-11.5398	41.3721	-0.249	cg06977014	RUNDC3B;ABCB1;RUNDC3B;RUNDC3B	NM_001134406;NM_000927;NM_001134405;NM_138290	87288184	87288307	NC_000007.13
cg25891212	2.47e-20	7.13e-23	-11.5394	41.3694	-0.147	cg25891212	PTPRN2;PTPRN2;PTPRN2	NM_002847;NM_130842;NM_130843	157639929	157640052	NC_000007.13
cg20197130	2.47e-20	7.15e-23	-11.5389	41.3665	-0.163	cg20197130			127256717	127256840	NC_000012.11
cg07768107	2.5e-20	7.24e-23	-11.5368	41.3533	-0.243	cg07768107	RHOH	NM_004310	40201943	40202066	NC_000004.11
cg02886188	2.54e-20	7.36e-23	-11.5344	41.3379	-0.191	cg02886188			183727013	183727136	NC_000004.11
cg21078065	2.54e-20	7.37e-23	-11.5342	41.3367	-0.219	cg21078065	C20orf151	NM_080833	60992461	60992584	NC_000020.10
cg07037223	2.55e-20	7.41e-23	-11.5332	41.3304	-0.215	cg07037223	PTPRN2;PTPRN2;PTPRN2	NM_002847;NM_130842;NM_130843	157618857	157618980	NC_000007.13
cg14380065	2.57e-20	7.47e-23	-11.532	41.3229	-0.117	cg14380065			10099505	10099628	NC_000010.10
cg00706913	2.6e-20	7.57e-23	-11.5299	41.3098	-0.213	cg00706913	PRDM16;PRDM16	NM_022114;NM_199454	3330139	3330262	NC_000001.10
cg01099299	2.62e-20	7.62e-23	-11.5288	41.3029	-0.0986	cg01099299	NCRNA00164	NR_027020	133016453	133016576	NC_000002.11
cg08282873	2.64e-20	7.7e-23	-11.5273	41.2929	-0.193	cg08282873			2633713	2633836	NC_000005.9
cg04151146	2.65e-20	7.75e-23	-11.5263	41.2869	-0.1	cg04151146	FLJ25328;FLJ25328	NR_024336;NR_024335	16144499	16144622	NC_000019.9
cg00480643	2.73e-20	7.98e-23	-11.5216	41.2575	-0.0909	cg00480643			117702017	117702140	NC_000004.11
cg24411972	2.73e-20	8.01e-23	-11.5212	41.2547	-0.185	cg24411972	C10orf93	NM_173572	134754396	134754519	NC_000010.10
cg03006531	2.76e-20	8.08e-23	-11.5316	41.2473	-0.0876	cg03006531			92806132	92806255	NC_000008.10
ch.17.1711350R	2.77e-20	8.14e-23	-11.5186	41.2381	-0.134	ch.17.1711350R	PRKCA	NM_002737	64569031	64569154	NC_000017.10
cg10481584	2.79e-20	8.2e-23	-11.5294	41.2335	-0.188	cg10481584			104708897	104709020	NC_000002.11
cg04091454	2.82e-20	8.31e-23	-11.5392	41.2218	-0.0839	cg04091454	DTWD2	NM_173666	118300663	118300786	NC_000005.9
cg09897604	2.82e-20	8.29e-23	-11.5158	41.2204	-0.236	cg09897604	WDFY4;WDFY4	NM_020945;NM_020945	49893549	49893672	NC_000010.10
cg07353006	2.83e-20	8.34e-23	-11.5147	41.2141	-0.236	cg07353006			10405104	10405227	NC_000008.10
cg01490728	2.9e-20	8.56e-23	-11.5108	41.1892	-0.251	cg01490728	SARDH;SARDH	NM_001134707;NM_007101	136565608	136565731	NC_000009.11
cg19988482	2.91e-20	8.6e-23	-11.5219	41.1867	-0.243	cg19988482			394572	394695	NC_000002.11
cg06833320	2.95e-20	8.72e-23	-11.5079	41.1708	-0.0597	cg06833320	KCTD5	NM_018992	2734682	2734805	NC_000016.9
cg25287708	2.96e-20	8.78e-23	-11.5068	41.1642	-0.22	cg25287708	PTCHD2	NM_020780	11596434	11596557	NC_000001.10
cg03461361	2.99e-20	8.85e-23	-11.5055	41.156	-0.0946	cg03461361	SEMA3A	NM_006080	83624353	83624476	NC_000007.13
cg02125499	3e-20	8.9e-23	-11.5047	41.1506	-0.0884	cg02125499			75033413	75033536	NC_000003.11
cg04458776	3.02e-20	8.96e-23	-11.5035	41.1433	-0.197	cg04458776	SLC22A6;SLC22A6;SLC22A6;SLC22A6	NM_153276;NM_153278;NM_153277;NM_004790	62753944	62754067	NC_000011.9
cg10898024	3.04e-20	9.03e-23	-11.5024	41.1361	-0.202	cg10898024			40266366	40266489	NC_000002.11
cg05294259	3.04e-20	9.04e-23	-11.5022	41.135	-0.147	cg05294259			1123848	1123971	NC_000008.10
cg08203460	3.07e-20	9.15e-23	-11.5003	41.1233	-0.249	cg08203460			11999601	11999724	NC_000007.13
cg00083659	3.1e-20	9.23e-23	-11.499	41.1148	-0.248	cg00083659	C22orf33;C22orf33	NM_178552;NM_001163857	37404577	37404700	NC_000022.10
cg23462772	3.13e-20	9.33e-23	-11.4973	41.1039	-0.252	cg23462772			49842612	49842735	NC_000010.10
cg11382945	3.17e-20	9.45e-23	-11.4952	41.0909	-0.191	cg11382945	C20orf26;C20orf26;CRNKL1	NM_001167816;NM_015585;NM_016652	20037150	20037273	NC_000020.10
cg07621224	3.17e-20	9.49e-23	-11.4946	41.0873	-0.247	cg07621224	IKZF1	NM_006060	50355506	50355629	NC_000007.13
cg23050300	3.23e-20	9.67e-23	-11.4916	41.0684	-0.291	cg23050300	PRDM16;PRDM16	NM_022114;NM_199454	3281321	3281444	NC_000001.10
cg02977559	3.32e-20	9.95e-23	-11.4989	41.0419	-0.102	cg02977559	HIST2H2BF;FCGR1A	NM_001161334;NM_000566	149758962	149759085	NC_000001.10
cg17535314	3.35e-20	1.01e-22	-11.4855	41.0302	-0.232	cg17535314	GDF10	NM_004962	48435475	48435598	NC_000010.10
cg16578568	3.37e-20	1.01e-22	-11.4846	41.0244	-0.23	cg16578568	C16orf54	NM_175900	29757405	29757528	NC_000016.9
cg22931795	3.38e-20	1.02e-22	-11.4839	41.0197	-0.181	cg22931795	CACNA2D3	NM_018398	54851924	54852047	NC_000003.11
cg19802477	3.39e-20	1.02e-22	-11.4833	41.0161	-0.23	cg19802477	LILRA4	NM_012276	54850444	54850567	NC_000019.9
cg09537279	3.41e-20	1.03e-22	-11.4823	41.0098	-0.18	cg09537279			178805558	178805681	NC_000005.9
cg00984696	3.41e-20	1.03e-22	-11.482	41.0077	-0.204	cg00984696	KALRN;KALRN	NM_001024660;NM_003947	124128381	124128504	NC_000003.11
cg18743793	3.44e-20	1.04e-22	-11.4805	40.9986	-0.237	cg18743793	IKZF1	NM_006060	50464661	50464784	NC_000007.13
cg22677240	3.49e-20	1.05e-22	-11.478	40.9829	-0.182	cg22677240			147802979	147803102	NC_000001.10
cg24432158	3.5e-20	1.06e-22	-11.4775	40.9796	-0.11	cg24432158			51892692	51892815	NC_000003.11
cg20934445	3.53e-20	1.07e-22	-11.4757	40.9684	-0.201	cg20934445	PTPRN2;PTPRN2;PTPRN2	NM_002847;NM_130842;NM_130843	157636784	157636907	NC_000007.13
cg12062534	3.53e-20	1.07e-22	-11.4756	40.9674	-0.103	cg12062534			57912662	57912785	NC_000006.11
cg16659657	3.59e-20	1.09e-22	-11.4729	40.9507	-0.101	cg16659657			185288478	185288601	NC_000003.11
cg01145572	3.6e-20	1.09e-22	-11.4723	40.9471	-0.173	cg01145572	FAM90A10	NM_001164447	7626957	7627080	NC_000008.10
cg11878955	3.63e-20	1.1e-22	-11.4708	40.9373	-0.204	cg11878955			6663896	6664019	NC_000019.9
cg11808936	3.64e-20	1.11e-22	-11.47	40.9322	-0.253	cg11808936	AFAP1;AFAP1	NM_198595;NM_001134647	7894203	7894326	NC_000004.11
cg20168964	3.66e-20	1.11e-22	-11.4693	40.9281	-0.254	cg20168964	TMEM132D	NM_133448	130333393	130333516	NC_000012.11
cg19958021	3.67e-20	1.12e-22	-11.4684	40.9223	-0.207	cg19958021	SOX11;SOX11	NM_003108;NM_003108	5840827	5840950	NC_000002.11
cg19441028	3.68e-20	1.12e-22	-11.4679	40.9193	-0.0795	cg19441028			207221855	207221978	NC_000002.11
cg00774391	3.69e-20	1.13e-22	-11.4675	40.9169	-0.0504	cg00774391			140320102	140320225	NC_000006.11
cg06592027	3.7e-20	1.13e-22	-11.4666	40.9112	-0.226	cg06592027	EGFLAM;EGFLAM;EGFLAM;EGFLAM	NM_152403;NM_182798;NM_182801;NM_182799	38445220	38445343	NC_000005.9
cg21157301	3.72e-20	1.14e-22	-11.4774	40.907	-0.198	cg21157301	FAM66D;LOC392196	NR_027425;NR_003275	11986864	11986987	NC_000008.10
cg09781307	3.79e-20	1.17e-22	-11.4622	40.8834	-0.222	cg09781307	BDNFOS	NR_002832	27648324	27648447	NC_000011.9
cg10978002	3.85e-20	1.18e-22	-11.46	40.8695	-0.0742	cg10978002	NRXN1;NRXN1	NM_004801;NM_001135659	50638627	50638750	NC_000002.11
cg08855630	3.87e-20	1.19e-22	-11.4587	40.8614	-0.209	cg08855630	FAM19A4;FAM19A4	NM_182522;NM_001005527	68978377	68978500	NC_000003.11
ch.11.310923R	3.94e-20	1.22e-22	-11.4555	40.8408	-0.123	ch.11.310923R	GALNTL4	NM_198516	11458355	11458478	NC_000011.9
cg00446472	3.94e-20	1.22e-22	-11.4554	40.8402	-0.253	cg00446472	CBFA2T3	NM_005187	89042082	89042205	NC_000016.9
cg02725872	3.95e-20	1.22e-22	-11.4547	40.8361	-0.191	cg02725872			58115012	58115135	NC_000008.10
cg21635307	3.95e-20	1.22e-22	-11.4547	40.836	-0.214	cg21635307	ANKRD6	NM_014942	90319877	90320000	NC_000006.11
cg26681383	3.96e-20	1.23e-22	-11.4544	40.834	-0.24	cg26681383	CACNA2D3	NM_018398	54700753	54700876	NC_000003.11
cg11575234	3.96e-20	1.23e-22	-11.4544	40.8338	-0.154	cg11575234	SORCS2	NM_020777	7484382	7484505	NC_000004.11
cg12360935	3.97e-20	1.23e-22	-11.4536	40.8294	-0.208	cg12360935	LOC257358	NR_026945	169757754	169757877	NC_000005.9
cg24849831	4.07e-20	1.26e-22	-11.4614	40.8069	-0.151	cg24849831	MED9	NM_018019	17389971	17390094	NC_000017.10
cg27104173	4.07e-20	1.26e-22	-11.4497	40.8047	-0.272	cg27104173	PTPRN2;PTPRN2;PTPRN2	NM_002847;NM_130842;NM_130843	157744316	157744439	NC_000007.13
cg16392193	4.23e-20	1.32e-22	-11.4434	40.7649	-0.14	cg16392193	SLC6A3	NM_001044	1393934	1394057	NC_000005.9
cg27144368	4.23e-20	1.32e-22	-11.4432	40.7639	-0.208	cg27144368	EML1;EML1	NM_001008707;NM_004434	100286635	100286758	NC_000014.8
cg23933216	4.25e-20	1.33e-22	-11.4422	40.7573	-0.192	cg23933216	PDE4DIP	NM_022359	145059467	145059590	NC_000001.10
cg06623274	4.29e-20	1.34e-22	-11.4406	40.7473	-0.211	cg06623274	MSR1;MSR1;MSR1;MSR1;MSR1;MSR1	NM_138715;NM_138716;NM_138716;NM_138715;NM_002445;NM_002445	16050111	16050234	NC_000008.10
cg16243652	4.37e-20	1.37e-22	-11.4373	40.7265	-0.103	cg16243652			2629249	2629372	NC_000001.10
cg20326359	4.42e-20	1.38e-22	-11.4357	40.7167	-0.158	cg20326359	SNORD114-23;SNORD114-24	NR_003216;NR_003217	101450218	101450341	NC_000014.8
cg03784113	4.43e-20	1.39e-22	-11.4353	40.7137	-0.233	cg03784113			112602492	112602615	NC_000013.10
cg25220990	4.53e-20	1.42e-22	-11.4311	40.6877	-0.223	cg25220990			4206669	4206792	NC_000005.9
cg12830752	4.59e-20	1.44e-22	-11.429	40.674	-0.171	cg12830752	ODZ4	NM_001098816	79108069	79108192	NC_000011.9
cg19497424	4.62e-20	1.46e-22	-11.4276	40.6652	-0.092	cg19497424			59288525	59288648	NC_000013.10
cg21209629	4.69e-20	1.48e-22	-11.4253	40.6512	-0.0871	cg21209629			189314788	189314911	NC_000003.11
cg11488350	4.69e-20	1.48e-22	-11.4251	40.6496	-0.0816	cg11488350			54844125	54844248	NC_000006.11
cg06422678	4.77e-20	1.51e-22	-11.4221	40.631	-0.166	cg06422678	GIMAP8	NM_175571	150147922	150148045	NC_000007.13
cg15858970	4.81e-20	1.52e-22	-11.4205	40.6205	-0.225	cg15858970	LOC100287718	NM_001162435	46714021	46714144	NC_000006.11
cg14153625	4.9e-20	1.55e-22	-11.4173	40.6008	-0.0924	cg14153625			157211426	157211549	NC_000004.11
cg21966754	4.92e-20	1.56e-22	-11.4166	40.5961	-0.26	cg21966754	TARM1	NM_001135686	54584816	54584939	NC_000019.9
cg10117562	5.07e-20	1.61e-22	-11.4232	40.567	-0.148	cg10117562			227695939	227696062	NC_000001.10
cg24039603	5.12e-20	1.63e-22	-11.4099	40.5539	-0.0826	cg24039603			81929044	81929167	NC_000014.8
cg26697065	5.22e-20	1.66e-22	-11.4067	40.5337	-0.201	cg26697065	SEPHS2	NM_012248	30456379	30456502	NC_000016.9
cg24506197	5.22e-20	1.66e-22	-11.4065	40.5327	-0.215	cg24506197	PTPRN2;PTPRN2;PTPRN2	NM_002847;NM_130842;NM_130843	158201392	158201515	NC_000007.13
cg06972978	5.22e-20	1.67e-22	-11.4064	40.5322	-0.079	cg06972978			88316423	88316546	NC_000004.11
cg24351382	5.24e-20	1.67e-22	-11.4059	40.5286	-0.25	cg24351382	PTPRN2;PTPRN2;PTPRN2	NM_002847;NM_130842;NM_130843	158278040	158278163	NC_000007.13
cg22330924	5.38e-20	1.72e-22	-11.4014	40.5003	-0.255	cg22330924			155900756	155900879	NC_000007.13
cg13379325	5.38e-20	1.72e-22	-11.4012	40.4992	-0.265	cg13379325	KCNQ2;KCNQ2;KCNQ2;KCNQ2	NM_172108;NM_172106;NM_172107;NM_004518	62052259	62052382	NC_000020.10
cg16987876	5.45e-20	1.75e-22	-11.3989	40.485	-0.212	cg16987876	GZMM	NM_005317	543909	544032	NC_000019.9
cg18770052	5.45e-20	1.75e-22	-11.3988	40.4844	-0.205	cg18770052			5661886	5662009	NC_000001.10
cg09017941	5.47e-20	1.76e-22	-11.3982	40.4804	-0.244	cg09017941			229163577	229163700	NC_000001.10
cg21864616	5.5e-20	1.77e-22	-11.397	40.473	-0.084	cg21864616			70479926	70480049	NC_000012.11
cg07521929	5.55e-20	1.79e-22	-11.3954	40.4631	-0.217	cg07521929	SLC4A9	NM_031467	139742283	139742406	NC_000005.9
cg16440978	5.6e-20	1.8e-22	-11.3938	40.4528	-0.293	cg16440978			91696240	91696363	NC_000014.8
cg04117590	5.73e-20	1.85e-22	-11.3899	40.4285	-0.237	cg04117590	NMNAT3	NM_178177	139346788	139346911	NC_000003.11
cg12598054	5.83e-20	1.88e-22	-11.3871	40.4106	-0.188	cg12598054	SORCS2;PSAPL1	NM_020777;NM_001085382	7437156	7437279	NC_000004.11
cg03826683	6.03e-20	1.96e-22	-11.3811	40.3731	-0.0664	cg03826683	C12orf40	NM_001031748	40093087	40093210	NC_000012.11
cg10177465	6.27e-20	2.04e-22	-11.3744	40.331	-0.214	cg10177465			77536811	77536934	NC_000017.10
cg23984397	6.27e-20	2.04e-22	-11.3742	40.3298	-0.226	cg23984397			20398889	20399012	NC_000005.9
cg16218302	6.3e-20	2.05e-22	-11.3735	40.3254	-0.134	cg16218302			8492328	8492451	NC_000004.11
cg01494994	6.38e-20	2.08e-22	-11.3714	40.3117	-0.314	cg01494994	SNTG2	NM_018968	1062590	1062713	NC_000002.11
cg07162000	6.47e-20	2.11e-22	-11.369	40.2965	-0.24	cg07162000	ADARB2	NM_018702	1774873	1774996	NC_000010.10
cg14108581	6.55e-20	2.15e-22	-11.3667	40.282	-0.257	cg14108581	TPO;TPO;TPO;TPO	NM_175719;NM_000547;NM_175721;NM_175722	1426094	1426217	NC_000002.11
cg20716100	6.59e-20	2.16e-22	-11.3655	40.275	-0.0714	cg20716100			19735064	19735187	NC_000020.10
cg22641201	6.63e-20	2.18e-22	-11.3645	40.2682	-0.234	cg22641201	BICC1	NM_001080512	60401105	60401228	NC_000010.10
ch.14.1488981R	6.64e-20	2.18e-22	-11.3642	40.2667	-0.22	ch.14.1488981R	RIN3	NM_024832	93077342	93077465	NC_000014.8
cg08140412	6.66e-20	2.19e-22	-11.3636	40.2627	-0.215	cg08140412	SCN8A	NM_014191	52014778	52014901	NC_000012.11
cg13800623	6.7e-20	2.2e-22	-11.3625	40.2558	-0.102	cg13800623			160861133	160861256	NC_000004.11
cg03087880	6.87e-20	2.26e-22	-11.3583	40.2293	-0.202	cg03087880	ZNF423	NM_015069	49666012	49666135	NC_000016.9
cg06938601	6.93e-20	2.29e-22	-11.3567	40.2191	-0.231	cg06938601	TCERG1L	NM_174937	132942686	132942809	NC_000010.10
cg10681811	6.94e-20	2.29e-22	-11.3564	40.2174	-0.0941	cg10681811			76904661	76904784	NC_000005.9
cg08804555	6.97e-20	2.31e-22	-11.3554	40.2114	-0.101	cg08804555			133468924	133469047	NC_000006.11
cg25153483	6.99e-20	2.32e-22	-11.3547	40.207	-0.0775	cg25153483			121513978	121514101	NC_000012.11
cg13640972	6.99e-20	2.32e-22	-11.3547	40.2069	-0.195	cg13640972	PTPRN2;PTPRN2;PTPRN2	NM_002847;NM_130842;NM_130843	157509749	157509872	NC_000007.13
cg20448617	6.99e-20	2.32e-22	-11.3546	40.2064	-0.171	cg20448617	PTPRN2;PTPRN2;PTPRN2	NM_002847;NM_130842;NM_130843	157647893	157648016	NC_000007.13
cg16067453	7.01e-20	2.33e-22	-11.354	40.2026	-0.0824	cg16067453			46053951	46054074	NC_000006.11
cg22956811	7.01e-20	2.33e-22	-11.354	40.2021	-0.0732	cg22956811			544333	544456	NC_000004.11
cg09209510	7.04e-20	2.34e-22	-11.353	40.1964	-0.265	cg09209510	EML1;EML1	NM_001008707;NM_004434	100288389	100288512	NC_000014.8
cg24215159	7.04e-20	2.34e-22	-11.353	40.1963	-0.296	cg24215159			4050695	4050818	NC_000002.11
cg06437747	7.12e-20	2.37e-22	-11.3513	40.1855	-0.212	cg06437747			2890836	2890959	NC_000001.10
cg00063346	7.18e-20	2.39e-22	-11.3497	40.1756	-0.193	cg00063346	OBSCN;OBSCN	NM_052843;NM_001098623	228489289	228489412	NC_000001.10
cg14241836	7.18e-20	2.39e-22	-11.3495	40.1744	-0.275	cg14241836			48124921	48125044	NC_000007.13
cg04138103	7.18e-20	2.4e-22	-11.3494	40.1735	-0.203	cg04138103			38796759	38796882	NC_000005.9
cg21033632	7.18e-20	2.4e-22	-11.3494	40.1733	-0.205	cg21033632	ADAMTS6	NM_197941	64486421	64486544	NC_000005.9
cg27149924	7.21e-20	2.41e-22	-11.3487	40.1694	-0.1	cg27149924			6915373	6915496	NC_000007.13
cg13742513	7.21e-20	2.41e-22	-11.3485	40.1679	-0.172	cg13742513	SLC25A41	NM_173637	6433825	6433948	NC_000019.9
cg08496086	7.24e-20	2.42e-22	-11.3476	40.162	-0.221	cg08496086			2176142	2176265	NC_000005.9
cg18873674	7.27e-20	2.43e-22	-11.3469	40.1579	-0.0628	cg18873674	RRM1	NM_001033	4158576	4158699	NC_000011.9
cg00401844	7.33e-20	2.45e-22	-11.3456	40.1494	-0.0934	cg00401844			9443929	9444052	NC_000016.9
cg16362899	7.33e-20	2.46e-22	-11.3455	40.1489	-0.0875	cg16362899	INPP5F	NM_014937	121554998	121555121	NC_000010.10
cg08246366	7.33e-20	2.46e-22	-11.3453	40.1479	-0.29	cg08246366	PTPRN2;PTPRN2;PTPRN2	NM_002847;NM_130842;NM_130843	157985113	157985236	NC_000007.13
cg13679714	7.33e-20	2.46e-22	-11.3452	40.1473	-0.217	cg13679714	ENPP7	NM_178543	77706946	77707069	NC_000017.10
cg16119613	7.34e-20	2.47e-22	-11.3448	40.1446	-0.193	cg16119613			127762762	127762885	NC_000012.11
cg22495968	7.35e-20	2.47e-22	-11.3445	40.1429	-0.203	cg22495968			5622155	5622278	NC_000002.11
cg25695378	7.36e-20	2.47e-22	-11.3443	40.1417	-0.0779	cg25695378	ANK2	NM_001127493	113879199	113879322	NC_000004.11
cg23770008	7.36e-20	2.48e-22	-11.3442	40.1411	-0.227	cg23770008			34453757	34453880	NC_000012.11
cg22876699	7.41e-20	2.5e-22	-11.3429	40.1328	-0.0863	cg22876699			46535972	46536095	NC_000003.11
cg23641672	7.42e-20	2.5e-22	-11.3427	40.131	-0.0789	cg23641672	RABGAP1L	NM_014857	174319673	174319796	NC_000001.10
ch.12.50831229F	7.44e-20	2.51e-22	-11.3532	40.1282	-0.195	ch.12.50831229F			52544962	52545085	NC_000012.11
cg13824009	7.46e-20	2.52e-22	-11.3412	40.1222	-0.178	cg13824009	SARDH;SARDH	NM_001134707;NM_007101	136547862	136547985	NC_000009.11
cg01771479	7.54e-20	2.55e-22	-11.3393	40.1102	-0.218	cg01771479			144198810	144198933	NC_000008.10
cg27324698	7.73e-20	2.62e-22	-11.3351	40.0837	-0.189	cg27324698	PTPRN2;PTPRN2;PTPRN2	NM_002847;NM_130842;NM_130843	157916687	157916810	NC_000007.13
cg16608672	7.75e-20	2.64e-22	-11.3344	40.0794	-0.0765	cg16608672			30346809	30346932	NC_000005.9
cg23712884	7.76e-20	2.64e-22	-11.3341	40.0771	-0.0847	cg23712884	PXDNL	NM_144651	52446758	52446881	NC_000008.10
cg12885302	7.8e-20	2.65e-22	-11.3333	40.0721	-0.231	cg12885302			129979348	129979471	NC_000010.10
ch.20.230983F	7.83e-20	2.67e-22	-11.3438	40.0689	-0.0939	ch.20.230983F	C20orf94	NM_001009608	10500546	10500669	NC_000020.10
cg20458044	7.86e-20	2.68e-22	-11.3318	40.0626	-0.184	cg20458044	TMEM49	NM_030938	57904327	57904450	NC_000017.10
cg10689441	7.87e-20	2.69e-22	-11.3314	40.0604	-0.0745	cg10689441			35265145	35265268	NC_000010.10
cg13403271	7.87e-20	2.69e-22	-11.3314	40.06	-0.205	cg13403271	PTPRN2;PTPRN2;PTPRN2	NM_002847;NM_130842;NM_130843	157738245	157738368	NC_000007.13
cg14958969	7.91e-20	2.7e-22	-11.3306	40.055	-0.259	cg14958969	MYT1L	NM_015025	1942814	1942937	NC_000002.11
ch.7.42690727F	7.92e-20	2.71e-22	-11.3415	40.0546	-0.145	ch.7.42690727F			42724202	42724325	NC_000007.13
cg07333231	7.92e-20	2.71e-22	-11.3301	40.0522	-0.301	cg07333231			1051728	1051851	NC_000008.10
cg13967811	7.98e-20	2.73e-22	-11.3287	40.0435	-0.258	cg13967811	EPB41L4A	NM_022140	111684298	111684421	NC_000005.9
cg02296931	8.03e-20	2.75e-22	-11.3277	40.0371	-0.295	cg02296931			1144658	1144781	NC_000001.10
cg13011961	8.06e-20	2.77e-22	-11.3268	40.0311	-0.195	cg13011961			67291183	67291306	NC_000003.11
cg02738156	8.06e-20	2.77e-22	-11.3267	40.031	-0.218	cg02738156			6910588	6910711	NC_000002.11
cg24243790	8.06e-20	2.77e-22	-11.3267	40.0307	-0.146	cg24243790			9760736	9760859	NC_000004.11
ch.4.1889364R	8.13e-20	2.79e-22	-11.3253	40.0219	-0.151	ch.4.1889364R	EIF4E;EIF4E;EIF4E	NM_001130678;NM_001968;NM_001130679	99822293	99822416	NC_000004.11
cg01556466	8.13e-20	2.8e-22	-11.3252	40.0211	-0.237	cg01556466	ADCYAP1R1	NM_001118	31146260	31146383	NC_000007.13
cg00178785	8.17e-20	2.81e-22	-11.3242	40.0152	-0.141	cg00178785			79263063	79263186	NC_000008.10
cg14581628	8.23e-20	2.84e-22	-11.3229	40.0067	-0.217	cg14581628	DBH	NM_000787	136503185	136503308	NC_000009.11
cg22328837	8.32e-20	2.87e-22	-11.321	39.9946	-0.234	cg22328837	RUNX2;RUNX2;RUNX2	NM_001015051;NM_001024630;NM_004348	45422120	45422243	NC_000006.11
cg16691557	8.36e-20	2.89e-22	-11.3201	39.9891	-0.0737	cg16691557			115562132	115562255	NC_000006.11
cg19794013	8.39e-20	2.9e-22	-11.3194	39.9848	-0.196	cg19794013	COL4A1	NM_001845	110838187	110838310	NC_000013.10
cg12181751	8.42e-20	2.91e-22	-11.3187	39.9806	-0.111	cg12181751			125474960	125475083	NC_000003.11
cg08725167	8.49e-20	2.94e-22	-11.3172	39.9711	-0.28	cg08725167	PTPRN2;PTPRN2;PTPRN2	NM_002847;NM_130842;NM_130843	157606738	157606861	NC_000007.13
cg08344524	8.5e-20	2.95e-22	-11.3168	39.9688	-0.205	cg08344524			56091621	56091744	NC_000015.9
cg12654190	8.53e-20	2.96e-22	-11.3162	39.9645	-0.149	cg12654190			129661635	129661758	NC_000002.11
cg17648213	8.56e-20	2.97e-22	-11.3155	39.9602	-0.261	cg17648213	PRAME;PRAME;PRAME;PRAME;PRAME	NM_206953;NM_006115;NM_206955;NM_206956;NM_206954	22899164	22899287	NC_000022.10
cg11781335	8.61e-20	2.99e-22	-11.3145	39.9542	-0.21	cg11781335			30818581	30818704	NC_000010.10
cg04381153	8.67e-20	3.02e-22	-11.3132	39.9461	-0.0735	cg04381153			38625307	38625430	NC_000002.11
cg12610098	8.7e-20	3.03e-22	-11.3125	39.9414	-0.104	cg12610098			75417804	75417927	NC_000001.10
cg01069738	8.71e-20	3.04e-22	-11.3122	39.9395	-0.183	cg01069738	RBP1	NM_002899	139236278	139236401	NC_000003.11
cg06485995	8.71e-20	3.04e-22	-11.3122	39.9393	-0.0951	cg06485995			27547647	27547770	NC_000007.13
cg24871371	8.74e-20	3.05e-22	-11.3115	39.9349	-0.142	cg24871371			161106477	161106600	NC_000006.11
cg25766247	8.8e-20	3.08e-22	-11.3102	39.9267	-0.238	cg25766247			59714165	59714288	NC_000008.10
cg10589782	8.88e-20	3.11e-22	-11.3085	39.9164	-0.0959	cg10589782			24960564	24960687	NC_000008.10
cg06966245	8.97e-20	3.14e-22	-11.3069	39.9059	-0.226	cg06966245			30043002	30043125	NC_000001.10
cg17682740	9e-20	3.16e-22	-11.306	39.9008	-0.134	cg17682740			84485659	84485782	NC_000013.10
cg07318636	9.02e-20	3.17e-22	-11.3056	39.8982	-0.0914	cg07318636			57711478	57711601	NC_000011.9
cg08639839	9.23e-20	3.24e-22	-11.3019	39.8749	-0.115	cg08639839			149069849	149069972	NC_000001.10
cg10115918	9.25e-20	3.25e-22	-11.3014	39.8719	-0.193	cg10115918	B3GNTL1	NM_001009905	80922807	80922930	NC_000017.10
cg20143111	9.34e-20	3.29e-22	-11.2998	39.8615	-0.223	cg20143111	CLNK	NM_052964	10673188	10673311	NC_000004.11
cg00706648	9.34e-20	3.29e-22	-11.2997	39.8612	-0.071	cg00706648	ABCC2	NM_000392	101581606	101581729	NC_000010.10
cg00105368	9.36e-20	3.29e-22	-11.2994	39.859	-0.0579	cg00105368			120038342	120038465	NC_000005.9
cg15924570	9.36e-20	3.3e-22	-11.2992	39.8578	-0.208	cg15924570			1144724	1144847	NC_000001.10
cg27102141	9.36e-20	3.3e-22	-11.2991	39.8574	-0.281	cg27102141			131843798	131843921	NC_000010.10
cg09360824	9.42e-20	3.33e-22	-11.2977	39.8483	-0.226	cg09360824	PTPRN2;PTPRN2;PTPRN2	NM_002847;NM_130842;NM_130843	157643722	157643845	NC_000007.13
cg02286081	9.45e-20	3.34e-22	-11.297	39.8443	-0.263	cg02286081	HLA-DPB1	NM_002121	33043841	33043964	NC_000006.11
cg23322812	9.64e-20	3.41e-22	-11.294	39.8249	-0.171	cg23322812	MIR346;GRID1	NR_029907;NM_017551	88024673	88024796	NC_000010.10
cg00980649	9.64e-20	3.41e-22	-11.2938	39.824	-0.223	cg00980649			106366503	106366626	NC_000014.8
cg15985798	9.91e-20	3.52e-22	-11.2892	39.7952	-0.109	cg15985798			4172943	4173066	NC_000004.11
cg13683827	1e-19	3.57e-22	-11.287	39.7812	-0.208	cg13683827	FAM113B	NM_138371	47617751	47617874	NC_000012.11
cg15025240	1.01e-19	3.6e-22	-11.2855	39.7716	-0.198	cg15025240	C2orf65	NM_138804	74811430	74811553	NC_000002.11
cg12624721	1.01e-19	3.6e-22	-11.2853	39.7703	-0.257	cg12624721			143511575	143511698	NC_000008.10
cg21847347	1.02e-19	3.62e-22	-11.2845	39.7655	-0.254	cg21847347	RAB37;CD300LF	NM_175738;NM_139018	72709572	72709695	NC_000017.10
cg00656826	1.02e-19	3.63e-22	-11.2844	39.7647	-0.076	cg00656826			5235588	5235711	NC_000016.9
cg22293458	1.02e-19	3.66e-22	-11.2831	39.7565	-0.224	cg22293458			184483865	184483988	NC_000003.11
cg13686799	1.04e-19	3.72e-22	-11.2805	39.7401	-0.166	cg13686799	MS4A15;MS4A15	NM_152717;NM_001098835	60524194	60524317	NC_000011.9
cg27052900	1.04e-19	3.73e-22	-11.2799	39.7364	-0.0896	cg27052900			77364620	77364743	NC_000014.8
cg08825225	1.05e-19	3.74e-22	-11.2794	39.7337	-0.238	cg08825225	FLI1;FLI1	NM_002017;NM_001167681	128586960	128587083	NC_000011.9
cg27074221	1.05e-19	3.75e-22	-11.2792	39.7322	-0.229	cg27074221	MIR495	NR_030175	101500080	101500203	NC_000014.8
cg04233669	1.05e-19	3.77e-22	-11.2781	39.7252	-0.229	cg04233669	LOC153328	NM_145282	135173201	135173324	NC_000005.9
cg26480662	1.08e-19	3.87e-22	-11.2742	39.7004	-0.226	cg26480662	PTPRN2;PTPRN2;PTPRN2	NM_002847;NM_130842;NM_130843	157778593	157778716	NC_000007.13
cg13513157	1.08e-19	3.88e-22	-11.2738	39.6981	-0.165	cg13513157			137366825	137366948	NC_000009.11
cg17486314	1.08e-19	3.88e-22	-11.2737	39.6978	-0.244	cg17486314	BACH2;BACH2	NM_021813;NM_001170794	90778227	90778350	NC_000006.11
cg25922610	1.11e-19	3.98e-22	-11.2696	39.6715	-0.169	cg25922610	OCM	NM_001097622	5919589	5919712	NC_000007.13
cg21540460	1.12e-19	4.02e-22	-11.2682	39.663	-0.141	cg21540460			187894584	187894707	NC_000004.11
cg03347837	1.12e-19	4.03e-22	-11.2679	39.6611	-0.212	cg03347837	TPO;TPO;TPO;TPO	NM_175719;NM_000547;NM_175721;NM_175722	1426181	1426304	NC_000002.11
cg04345559	1.12e-19	4.06e-22	-11.2666	39.653	-0.0858	cg04345559			152176671	152176794	NC_000004.11
cg18618815	1.13e-19	4.07e-22	-11.2664	39.6517	-0.224	cg18618815	COL1A1	NM_000088	48275324	48275447	NC_000017.10
cg25938025	1.14e-19	4.11e-22	-11.2761	39.6441	-0.252	cg25938025			167508001	167508124	NC_000006.11
cg05767404	1.16e-19	4.2e-22	-11.2724	39.6215	-0.26	cg05767404	C1orf150	NM_145278	247712591	247712714	NC_000001.10
cg14844559	1.17e-19	4.24e-22	-11.2599	39.6107	-0.231	cg14844559			76277463	76277586	NC_000018.9
cg23909368	1.17e-19	4.25e-22	-11.2594	39.6076	-0.0761	cg23909368			15770678	15770801	NC_000017.10
cg26028371	1.17e-19	4.25e-22	-11.2593	39.6068	-0.177	cg26028371			76163007	76163130	NC_000018.9
cg22272803	1.18e-19	4.27e-22	-11.2587	39.6034	-0.254	cg22272803			155989369	155989492	NC_000007.13
cg21389924	1.18e-19	4.27e-22	-11.2586	39.6024	-0.112	cg21389924			12809614	12809737	NC_000003.11
ch.2.105901354F	1.18e-19	4.3e-22	-11.2576	39.5962	-0.232	ch.2.105901354F			106534922	106535045	NC_000002.11
cg27419419	1.2e-19	4.37e-22	-11.2551	39.5807	-0.142	cg27419419			4982977	4983100	NC_000002.11
cg18616228	1.2e-19	4.39e-22	-11.2544	39.5763	-0.0995	cg18616228	FLJ45340	NR_024368	128294405	128294528	NC_000007.13
cg17969683	1.21e-19	4.39e-22	-11.2543	39.5753	-0.22	cg17969683	ADAM28;ADAM28	NM_014265;NM_021777	24151514	24151637	NC_000008.10
cg02720925	1.22e-19	4.45e-22	-11.2521	39.5616	-0.194	cg02720925	TNRC18	NM_001080495	5347820	5347943	NC_000007.13
cg14551991	1.22e-19	4.46e-22	-11.2518	39.5599	-0.235	cg14551991			5625221	5625344	NC_000002.11
cg18472699	1.23e-19	4.48e-22	-11.251	39.5549	-0.207	cg18472699			29074660	29074783	NC_000018.9
cg21437470	1.23e-19	4.49e-22	-11.2508	39.5534	-0.103	cg21437470			26187634	26187757	NC_000007.13
cg05823038	1.24e-19	4.55e-22	-11.2487	39.5404	-0.184	cg05823038			29133505	29133628	NC_000006.11
cg00846554	1.25e-19	4.59e-22	-11.2475	39.5327	-0.23	cg00846554	PHACTR1	NM_030948	12748001	12748124	NC_000006.11
cg11304742	1.3e-19	4.78e-22	-11.2409	39.4913	-0.0621	cg11304742			32499852	32499975	NC_000006.11
cg07554474	1.31e-19	4.8e-22	-11.2405	39.4888	-0.196	cg07554474	MARCO	NM_006770	119698443	119698566	NC_000002.11
cg17269565	1.32e-19	4.84e-22	-11.2391	39.48	-0.074	cg17269565			80940180	80940303	NC_000015.9
cg01899542	1.33e-19	4.89e-22	-11.2373	39.4691	-0.246	cg01899542	ZNF423	NM_015069	49732224	49732347	NC_000016.9
cg07209823	1.33e-19	4.92e-22	-11.2365	39.464	-0.087	cg07209823			57045864	57045987	NC_000012.11
cg12164975	1.34e-19	4.94e-22	-11.2358	39.4592	-0.0827	cg12164975	LMBR1	NM_022458	156665847	156665970	NC_000007.13
cg05343739	1.35e-19	4.98e-22	-11.2347	39.4522	-0.21	cg05343739	KCNN3;KCNN3	NM_002249;NM_170782	154731938	154732061	NC_000001.10
cg08333616	1.38e-19	5.09e-22	-11.231	39.4294	-0.215	cg08333616	TIMD4;TIMD4	NM_001146726;NM_138379	156369336	156369459	NC_000005.9
cg25001924	1.39e-19	5.13e-22	-11.2299	39.4225	-0.263	cg25001924	PTPRN2;PTPRN2;PTPRN2	NM_002847;NM_130842;NM_130843	157919982	157920105	NC_000007.13
cg08191854	1.4e-19	5.18e-22	-11.2283	39.4124	-0.252	cg08191854	TRPM2	NM_003307	45773294	45773417	NC_000021.8
cg07969622	1.4e-19	5.2e-22	-11.2278	39.4094	-0.236	cg07969622	LOC648691;PRAME;PRAME;PRAME;PRAME;PRAME	NR_027426;NM_206956;NM_206955;NM_206953;NM_006115;NM_206954	22901569	22901692	NC_000022.10
cg22267131	1.4e-19	5.21e-22	-11.2275	39.4075	-0.0698	cg22267131			112849961	112850084	NC_000006.11
cg00786237	1.4e-19	5.21e-22	-11.2274	39.4068	-0.186	cg00786237			154150299	154150422	NC_000003.11
cg20390826	1.41e-19	5.23e-22	-11.2267	39.4025	-0.101	cg20390826	PCDH9;PCDH9	NM_203487;NM_020403	67197173	67197296	NC_000013.10
cg16908215	1.45e-19	5.4e-22	-11.222	39.3725	-0.219	cg16908215	GIMAP5	NM_018384	150440016	150440139	NC_000007.13
cg14087921	1.45e-19	5.4e-22	-11.2219	39.3719	-0.233	cg14087921	KCNT1	NM_020822	138660958	138661081	NC_000009.11
cg15371617	1.45e-19	5.4e-22	-11.2218	39.3716	-0.171	cg15371617	HAVCR2;HAVCR2	NM_032782;NM_032782	156536137	156536260	NC_000005.9
cg04775824	1.45e-19	5.43e-22	-11.221	39.3662	-0.224	cg04775824	PTPRN2;PTPRN2;PTPRN2	NM_002847;NM_130842;NM_130843	157410240	157410363	NC_000007.13
ch.7.2635062R	1.46e-19	5.46e-22	-11.2201	39.361	-0.144	ch.7.2635062R	SND1	NM_014390	127719998	127720121	NC_000007.13
cg10643608	1.46e-19	5.47e-22	-11.2199	39.3595	-0.0693	cg10643608	DEFB121	NM_001011878	29994846	29994969	NC_000020.10
ch.20.50133246R	1.46e-19	5.47e-22	-11.2198	39.3587	-0.211	ch.20.50133246R			50699839	50699962	NC_000020.10
cg11164441	1.47e-19	5.51e-22	-11.2187	39.3519	-0.228	cg11164441	PDE6B;PDE6B;PDE6B	NM_000283;NM_001145291;NM_001145292	656100	656223	NC_000004.11
ch.2.226734209F	1.49e-19	5.61e-22	-11.2158	39.3338	-0.189	ch.2.226734209F			227025965	227026088	NC_000002.11
cg16470963	1.52e-19	5.71e-22	-11.2131	39.3166	-0.0623	cg16470963	ZUFSP	NM_145062	116960059	116960182	NC_000006.11
cg04948906	1.53e-19	5.75e-22	-11.2121	39.3102	-0.249	cg04948906	OR8B12	NM_001005195	124413229	124413352	NC_000011.9
cg22740796	1.53e-19	5.76e-22	-11.2117	39.3079	-0.229	cg22740796			132461281	132461404	NC_000010.10
cg19071398	1.54e-19	5.79e-22	-11.2108	39.3025	-0.124	cg19071398	MAN2A1	NM_002372	109168704	109168827	NC_000005.9
cg01311181	1.56e-19	5.89e-22	-11.2083	39.2864	-0.162	cg01311181	PARVG;PARVG;PARVG;PARVG;PARVG;PARVG	NM_001137605;NR_024427;NM_001137606;NR_024428;NR_024426;NM_022141	44577181	44577304	NC_000022.10
cg05788125	1.57e-19	5.93e-22	-11.2071	39.279	-0.171	cg05788125			170559721	170559844	NC_000006.11
cg12278179	1.59e-19	6.01e-22	-11.2051	39.2663	-0.223	cg12278179	PARVG;PARVG;PARVG;PARVG;PARVG;PARVG	NM_001137605;NR_024427;NM_001137606;NR_024428;NR_024426;NM_022141	44577920	44578043	NC_000022.10
cg11592576	1.6e-19	6.04e-22	-11.2153	39.2637	-0.22	cg11592576	CYP8B1;CYP8B1	NM_004391;NM_004391	42915467	42915590	NC_000003.11
cg09308502	1.6e-19	6.05e-22	-11.2041	39.2602	-0.116	cg09308502			118862596	118862719	NC_000011.9
cg07960624	1.63e-19	6.16e-22	-11.2011	39.2413	-0.244	cg07960624	SAMD12	NM_001101676	119208486	119208609	NC_000008.10
cg25549733	1.64e-19	6.22e-22	-11.1996	39.232	-0.0772	cg25549733			139474727	139474850	NC_000004.11
cg21765235	1.64e-19	6.24e-22	-11.1992	39.2297	-0.195	cg21765235	ODZ4	NM_001098816	79024011	79024134	NC_000011.9
cg18793886	1.65e-19	6.25e-22	-11.1989	39.2277	-0.0996	cg18793886			30429433	30429556	NC_000005.9
cg18204964	1.65e-19	6.26e-22	-11.1987	39.2264	-0.231	cg18204964	LIFR;LIFR	NM_001127671;NM_002310	38487146	38487269	NC_000005.9
cg09682848	1.66e-19	6.32e-22	-11.1972	39.2171	-0.179	cg09682848			132928795	132928918	NC_000012.11
cg20052431	1.67e-19	6.36e-22	-11.1961	39.21	-0.0806	cg20052431			145740788	145740911	NC_000007.13
cg19747271	1.68e-19	6.42e-22	-11.1947	39.201	-0.205	cg19747271	SCAND3	NM_052923	28553390	28553513	NC_000006.11
cg02127689	1.69e-19	6.45e-22	-11.194	39.1966	-0.167	cg02127689			5849049	5849172	NC_000006.11
cg18422055	1.72e-19	6.56e-22	-11.1912	39.1794	-0.194	cg18422055	PLCL2;PLCL2	NM_001144382;NM_015184	16977485	16977608	NC_000003.11
cg01908508	1.72e-19	6.59e-22	-11.1907	39.176	-0.195	cg01908508			87569142	87569265	NC_000002.11
cg08371086	1.77e-19	6.81e-22	-11.1854	39.1427	-0.146	cg08371086	FAM19A1	NM_213609	68131204	68131327	NC_000003.11
cg07063914	1.79e-19	6.87e-22	-11.1839	39.1336	-0.0803	cg07063914			143304624	143304747	NC_000002.11
cg01310118	1.79e-19	6.91e-22	-11.1832	39.1291	-0.17	cg01310118	SMOC2;SMOC2	NM_022138;NM_001166412	168855168	168855291	NC_000006.11
cg06750564	1.79e-19	6.91e-22	-11.1832	39.1287	-0.209	cg06750564	TBXAS1;TBXAS1;TBXAS1;TBXAS1;TBXAS1;TBXAS1	NM_001166253;NR_029394;NM_001130966;NM_001061;NM_030984;NM_001166254	139637446	139637569	NC_000007.13
cg00331101	1.85e-19	7.14e-22	-11.1779	39.0956	-0.257	cg00331101			184949987	184950110	NC_000004.11
cg22157099	1.88e-19	7.26e-22	-11.1754	39.0799	-0.285	cg22157099			15830172	15830295	NC_000002.11
cg17386050	1.88e-19	7.28e-22	-11.1749	39.0772	-0.116	cg17386050	FLJ13197	NR_026804	38629467	38629590	NC_000004.11
cg24254317	1.89e-19	7.3e-22	-11.1854	39.076	-0.224	cg24254317	PTPRN2;PTPRN2;PTPRN2	NM_002847;NM_130842;NM_130843	157834846	157834969	NC_000007.13
cg10835286	1.9e-19	7.34e-22	-11.1736	39.0685	-0.206	cg10835286			66657913	66658036	NC_000002.11
cg00847544	1.93e-19	7.48e-22	-11.1707	39.0503	-0.137	cg00847544	PTPRN2;PTPRN2;PTPRN2	NM_002847;NM_130842;NM_130843	157439651	157439774	NC_000007.13
cg15626881	1.93e-19	7.48e-22	-11.1706	39.0497	-0.224	cg15626881			33923464	33923587	NC_000007.13
cg15716479	1.93e-19	7.5e-22	-11.1812	39.0497	-0.0935	cg15716479			36066506	36066629	NC_000019.9
cg18560366	1.94e-19	7.53e-22	-11.1806	39.0459	-0.232	cg18560366	DPPA4	NM_018189	109057564	109057687	NC_000003.11
cg21681320	1.95e-19	7.55e-22	-11.1692	39.041	-0.222	cg21681320	PRDM16;PRDM16	NM_022114;NM_199454	3011044	3011167	NC_000001.10
cg03042396	1.95e-19	7.59e-22	-11.1683	39.0358	-0.0785	cg03042396			71324028	71324151	NC_000011.9
cg20682390	1.96e-19	7.61e-22	-11.1789	39.0355	-0.0691	cg20682390	CLIC4	NM_013943	25125668	25125791	NC_000001.10
cg26171505	1.96e-19	7.63e-22	-11.1674	39.0301	-0.112	cg26171505	NCRNA00164	NR_027020	133016799	133016922	NC_000002.11
cg22436753	1.96e-19	7.64e-22	-11.1673	39.0293	-0.227	cg22436753	TRAF3IP3;TRAF3IP3	NM_025228;NM_025228	209929546	209929669	NC_000001.10
cg21797973	1.96e-19	7.65e-22	-11.1671	39.028	-0.129	cg21797973			38241730	38241853	NC_000014.8
cg13754621	1.97e-19	7.69e-22	-11.1663	39.023	-0.0946	cg13754621			85372582	85372705	NC_000009.11
cg01546430	1.99e-19	7.74e-22	-11.1761	39.0182	-0.189	cg01546430	ITK	NM_005546	156607836	156607959	NC_000005.9
cg21196930	2.01e-19	7.83e-22	-11.1636	39.0057	-0.202	cg21196930			23214308	23214431	NC_000006.11
cg01238669	2.01e-19	7.84e-22	-11.1633	39.0044	-0.232	cg01238669	DNAH11	NM_003777	21797276	21797399	NC_000007.13
cg03607573	2.02e-19	7.9e-22	-11.1621	38.9968	-0.193	cg03607573	TAF1D	NM_024116	93471889	93472012	NC_000011.9
cg09904358	2.03e-19	7.95e-22	-11.1719	38.992	-0.201	cg09904358	KIAA1217	NM_001098500	24446911	24447034	NC_000010.10
cg16393125	2.03e-19	7.94e-22	-11.1614	38.9919	-0.0644	cg16393125			87607744	87607867	NC_000006.11
cg06137123	2.03e-19	7.95e-22	-11.1611	38.9905	-0.22	cg06137123			129444480	129444603	NC_000011.9
cg08438268	2.03e-19	7.96e-22	-11.1609	38.9893	-0.088	cg08438268			5155708	5155831	NC_000003.11
cg12939283	2.04e-19	7.99e-22	-11.1603	38.9854	-0.237	cg12939283	HLA-DPB1	NM_002121	33044012	33044135	NC_000006.11
cg24646841	2.04e-19	8e-22	-11.1602	38.9844	-0.227	cg24646841	PTPRN2;PTPRN2;PTPRN2	NM_002847;NM_130842;NM_130843	157818696	157818819	NC_000007.13
cg15970860	2.04e-19	8.02e-22	-11.1597	38.9818	-0.0684	cg15970860	TEC	NM_003215	48188143	48188266	NC_000004.11
cg04215126	2.05e-19	8.04e-22	-11.1593	38.9792	-0.189	cg04215126	FLJ23834	NM_152750	105621846	105621969	NC_000007.13
cg04444661	2.08e-19	8.18e-22	-11.1567	38.9624	-0.195	cg04444661	LIFR;LIFR	NM_001127671;NM_002310	38552952	38553075	NC_000005.9
cg10944063	2.08e-19	8.2e-22	-11.1562	38.9595	-0.205	cg10944063	SCTR	NM_002980	120233706	120233829	NC_000002.11
cg13301423	2.08e-19	8.21e-22	-11.156	38.9583	-0.185	cg13301423	COL23A1	NM_173465	177986696	177986819	NC_000005.9
cg11148381	2.1e-19	8.28e-22	-11.1657	38.9527	-0.16	cg11148381	MYT1L	NM_015025	2000815	2000938	NC_000002.11
cg26357403	2.11e-19	8.32e-22	-11.1539	38.9454	-0.21	cg26357403			1878565	1878688	NC_000001.10
cg04378182	2.13e-19	8.41e-22	-11.1523	38.9352	-0.12	cg04378182			12125335	12125458	NC_000017.10
cg26861995	2.13e-19	8.41e-22	-11.1523	38.9348	-0.242	cg26861995	RUVBL1	NM_003707	127831673	127831796	NC_000003.11
cg10276834	2.13e-19	8.43e-22	-11.1519	38.9325	-0.222	cg10276834	CHRM2;CHRM2;CHRM2;CHRM2;CHRM2;CHRM2;CHRM2;CHRM2	NM_001006631;NM_000739;NM_001006627;NM_001006628;NM_001006629;NM_001006632;NM_001006630;NM_001006626	136575360	136575483	NC_000007.13
cg26560020	2.13e-19	8.43e-22	-11.1519	38.9324	-0.0771	cg26560020			952794	952917	NC_000001.10
cg09459740	2.16e-19	8.55e-22	-11.1828	38.9252	-0.0985	cg09459740			108244548	108244671	NC_000011.9
cg11088672	2.15e-19	8.51e-22	-11.1503	38.9227	-0.21	cg11088672			142678613	142678736	NC_000004.11
cg19088503	2.15e-19	8.54e-22	-11.1499	38.92	-0.17	cg19088503			86910486	86910609	NC_000010.10
cg07755689	2.18e-19	8.65e-22	-11.1477	38.9064	-0.235	cg07755689			119912190	119912313	NC_000002.11
cg10576245	2.18e-19	8.67e-22	-11.1475	38.9049	-0.252	cg10576245	PCNXL2	NM_014801	233249267	233249390	NC_000001.10
ch.16.2068605F	2.19e-19	8.71e-22	-11.1468	38.9006	-0.125	ch.16.2068605F	MAP1LC3B	NM_022818	87437924	87438047	NC_000016.9
cg25755851	2.2e-19	8.75e-22	-11.1459	38.8952	-0.262	cg25755851			9335794	9335917	NC_000001.10
cg25903223	2.21e-19	8.81e-22	-11.1449	38.8883	-0.269	cg25903223	PTPRN2;PTPRN2;PTPRN2	NM_002847;NM_130842;NM_130843	157967926	157968049	NC_000007.13
cg22120894	2.21e-19	8.83e-22	-11.1446	38.8865	-0.105	cg22120894			67548326	67548449	NC_000007.13
cg07998554	2.26e-19	9.01e-22	-11.1415	38.8671	-0.245	cg07998554	EMR3	NM_032571	14785776	14785899	NC_000019.9
cg19885587	2.27e-19	9.06e-22	-11.1406	38.8615	-0.156	cg19885587			7441706	7441829	NC_000008.10
cg20495903	2.27e-19	9.06e-22	-11.1405	38.8611	-0.195	cg20495903	HRNBP3	NM_001082575	77457534	77457657	NC_000017.10
cg26893451	2.27e-19	9.09e-22	-11.14	38.8576	-0.208	cg26893451			227679599	227679722	NC_000001.10
cg09351881	2.28e-19	9.11e-22	-11.1396	38.8553	-0.265	cg09351881			188190184	188190307	NC_000004.11
cg05775862	2.29e-19	9.18e-22	-11.1494	38.8509	-0.225	cg05775862			31026101	31026224	NC_000010.10
cg26361533	2.29e-19	9.19e-22	-11.1383	38.8473	-0.225	cg26361533	CACNA1C;CACNA1C;CACNA1C;CACNA1C;CACNA1C;CACNA1C;CACNA1C;CACNA1C;CACNA1C;CACNA1C;CACNA1C;CACNA1C;CACNA1C;CACNA1C;CACNA1C;CACNA1C;CACNA1C;CACNA1C;CACNA1C;CACNA1C;CACNA1C;CACNA1C;CACNA1C	NM_001129844;NM_001129827;NM_001129839;NM_001129834;NM_001129841;NM_000719;NM_001129830;NM_001167625;NM_001129843;NM_001167624;NM_001129835;NM_001129837;NM_001167623;NM_001129840;NM_199460;NM_001129833;NM_001129832;NM_001129829;NM_001129846;NM_001129836;NM_001129838;NM_001129831;NM_001129842	2445561	2445684	NC_000012.11
ch.7.135065R	2.3e-19	9.24e-22	-11.1374	38.8417	-0.138	ch.7.135065R	TTYH3	NM_025250	2696746	2696869	NC_000007.13
cg13831106	2.31e-19	9.28e-22	-11.1369	38.8381	-0.256	cg13831106	MYT1L	NM_015025	2119853	2119976	NC_000002.11
cg13299698	2.32e-19	9.31e-22	-11.1363	38.8347	-0.244	cg13299698	NPR3	NM_000908	32734568	32734691	NC_000005.9
cg02351277	2.33e-19	9.38e-22	-11.135	38.8266	-0.257	cg02351277			177397780	177397903	NC_000003.11
ch.10.2563868F	2.34e-19	9.42e-22	-11.1452	38.8249	-0.123	ch.10.2563868F	TIAL1;TIAL1	NM_001033925;NM_003252	121344024	121344147	NC_000010.10
cg00853242	2.36e-19	9.51e-22	-11.133	38.8139	-0.213	cg00853242	ESPN	NM_031475	6511997	6512120	NC_000001.10
cg08689708	2.36e-19	9.51e-22	-11.1329	38.813	-0.218	cg08689708	MYT1L	NM_015025	1927209	1927332	NC_000002.11
cg22254606	2.37e-19	9.58e-22	-11.1318	38.8064	-0.201	cg22254606			119479475	119479598	NC_000006.11
cg26270116	2.37e-19	9.59e-22	-11.1317	38.8057	-0.118	cg26270116	TNN	NM_022093	175076209	175076332	NC_000001.10
cg04233537	2.37e-19	9.59e-22	-11.1316	38.8051	-0.187	cg04233537			77307863	77307986	NC_000016.9
cg07849460	2.38e-19	9.64e-22	-11.1308	38.8001	-0.18	cg07849460	PTPRN2;PTPRN2;PTPRN2	NM_002847;NM_130842;NM_130843	158349960	158350083	NC_000007.13
cg03763796	2.4e-19	9.7e-22	-11.1297	38.7934	-0.241	cg03763796	VPREB1	NM_007128	22599128	22599251	NC_000022.10
cg12759909	2.4e-19	9.71e-22	-11.1296	38.7928	-0.17	cg12759909	NFATC1;NFATC1;NFATC1;NFATC1	NM_172388;NM_172387;NM_172389;NM_006162	77289253	77289376	NC_000018.9
cg11356247	2.4e-19	9.72e-22	-11.1296	38.7924	-0.288	cg11356247	PTPRN2;PTPRN2;PTPRN2	NM_002847;NM_130842;NM_130843	157744347	157744470	NC_000007.13
cg03850597	2.41e-19	9.78e-22	-11.1285	38.786	-0.101	cg03850597			3899366	3899489	NC_000004.11
cg06374814	2.43e-19	9.84e-22	-11.1275	38.7794	-0.139	cg06374814			47084257	47084380	NC_000018.9
cg02282833	2.46e-19	9.97e-22	-11.1255	38.767	-0.241	cg02282833	NPR3	NM_000908	32726189	32726312	NC_000005.9
cg05765796	2.47e-19	1e-21	-11.1245	38.7604	-0.258	cg05765796			155971123	155971246	NC_000007.13
cg00404025	2.48e-19	1.01e-21	-11.1236	38.7551	-0.191	cg00404025	WDFY4	NM_020945	49892741	49892864	NC_000010.10
cg01071159	2.49e-19	1.01e-21	-11.123	38.7511	-0.175	cg01071159			129492198	129492321	NC_000002.11
cg17918270	2.54e-19	1.03e-21	-11.1199	38.7316	-0.369	cg17918270	MYT1L	NM_015025	1983484	1983607	NC_000002.11
cg08773462	2.54e-19	1.03e-21	-11.1196	38.7301	-0.294	cg08773462			17107610	17107733	NC_000016.9
cg14966941	2.54e-19	1.04e-21	-11.1196	38.7297	-0.141	cg14966941	FAM90A1	NM_018088	8377808	8377931	NC_000012.11
cg08285289	2.55e-19	1.04e-21	-11.1188	38.7245	-0.243	cg08285289			1962501	1962624	NC_000005.9
cg18705155	2.56e-19	1.04e-21	-11.1182	38.7211	-0.247	cg18705155	KCNK5	NM_003740	39194077	39194200	NC_000006.11
cg20519944	2.58e-19	1.05e-21	-11.1168	38.7124	-0.246	cg20519944	PTPRN2;PTPRN2;PTPRN2	NM_002847;NM_130842;NM_130843	157412886	157413009	NC_000007.13
cg19478820	2.59e-19	1.06e-21	-11.1162	38.7087	-0.181	cg19478820			45044355	45044478	NC_000011.9
cg09586743	2.59e-19	1.06e-21	-11.1159	38.7069	-0.214	cg09586743			155134244	155134367	NC_000005.9
cg25818109	2.6e-19	1.06e-21	-11.1151	38.7018	-0.212	cg25818109	MASP1	NM_001879	186937654	186937777	NC_000003.11
cg24098008	2.62e-19	1.07e-21	-11.1249	38.6974	-0.201	cg24098008			132877018	132877141	NC_000010.10
cg04311653	2.64e-19	1.08e-21	-11.113	38.6885	-0.269	cg04311653			133204241	133204364	NC_000010.10
ch.5.2059852R	2.66e-19	1.09e-21	-11.1223	38.6811	-0.122	ch.5.2059852R	MCC;MCC	NM_002387;NM_001085377	112527631	112527754	NC_000005.9
ch.22.528917R	2.66e-19	1.09e-21	-11.1112	38.6771	-0.111	ch.22.528917R	HMGXB4;HMGXB4	NM_001003681;NR_027780	35670551	35670674	NC_000022.10
cg05249479	2.67e-19	1.1e-21	-11.1104	38.6722	-0.202	cg05249479	EVL	NM_016337	100542584	100542707	NC_000014.8
cg10442729	2.69e-19	1.1e-21	-11.1096	38.6671	-0.231	cg10442729			241585833	241585956	NC_000002.11
cg16620229	2.69e-19	1.1e-21	-11.1095	38.6666	-0.221	cg16620229	RAB33A	NM_004794	129307331	129307454	NC_000023.10
cg00066668	2.72e-19	1.12e-21	-11.1074	38.6536	-0.0599	cg00066668	GPR133	NM_198827	131482233	131482356	NC_000012.11
cg23281456	2.72e-19	1.12e-21	-11.1071	38.6515	-0.116	cg23281456			115398676	115398799	NC_000008.10
cg04753936	2.77e-19	1.14e-21	-11.1041	38.6327	-0.213	cg04753936	LILRB1;LILRB1;LILRB1;LILRB1	NM_001081638;NM_001081639;NM_006669;NM_001081637	55141618	55141741	NC_000019.9
cg23229770	2.78e-19	1.15e-21	-11.1036	38.6295	-0.195	cg23229770			129491004	129491127	NC_000002.11
cg24516912	2.78e-19	1.15e-21	-11.1031	38.6263	-0.0767	cg24516912			109223644	109223767	NC_000010.10
cg12610440	2.81e-19	1.16e-21	-11.1123	38.6187	-0.0693	cg12610440			120038247	120038370	NC_000005.9
cg24028634	2.84e-19	1.18e-21	-11.1104	38.6069	-0.271	cg24028634			113584107	113584230	NC_000013.10
cg27573298	2.84e-19	1.17e-21	-11.0998	38.6058	-0.233	cg27573298			14697589	14697712	NC_000001.10
cg20979737	2.84e-19	1.17e-21	-11.0997	38.6053	-0.233	cg20979737			244964768	244964891	NC_000001.10
cg06348826	2.87e-19	1.19e-21	-11.0977	38.5922	-0.2	cg06348826	PRDM16;PRDM16	NM_022114;NM_199454	2994051	2994174	NC_000001.10
cg17033891	2.87e-19	1.19e-21	-11.0974	38.5904	-0.239	cg17033891			159852976	159853099	NC_000003.11
cg09858767	2.92e-19	1.21e-21	-11.0947	38.5737	-0.231	cg09858767			14742375	14742498	NC_000001.10
cg05543443	2.92e-19	1.21e-21	-11.0946	38.5733	-0.14	cg05543443			35574064	35574187	NC_000005.9
cg27407428	2.94e-19	1.22e-21	-11.0932	38.5643	-0.196	cg27407428			94106470	94106593	NC_000015.9
cg03844372	2.95e-19	1.23e-21	-11.0929	38.5626	-0.248	cg03844372	KIAA1217	NM_001098500	24160305	24160428	NC_000010.10
cg01738164	2.95e-19	1.23e-21	-11.0928	38.5615	-0.255	cg01738164			90147503	90147626	NC_000014.8
cg05017760	2.95e-19	1.23e-21	-11.0922	38.5579	-0.0856	cg05017760			117544399	117544522	NC_000008.10
cg00031346	2.95e-19	1.23e-21	-11.0921	38.5574	-0.2	cg00031346	FRMD1	NM_024919	168478519	168478642	NC_000006.11
cg07900281	2.96e-19	1.24e-21	-11.0915	38.5536	-0.0624	cg07900281	UBR2	NM_015255	42654847	42654970	NC_000006.11
cg10434881	2.97e-19	1.24e-21	-11.0909	38.5496	-0.078	cg10434881			6884098	6884221	NC_000007.13
cg19420930	2.97e-19	1.24e-21	-11.0908	38.5491	-0.208	cg19420930	SORCS2	NM_020777	7667618	7667741	NC_000004.11
cg11453079	2.98e-19	1.25e-21	-11.0904	38.5467	-0.22	cg11453079	HNF4A;HNF4A	NM_178849;NM_000457	43058872	43058995	NC_000020.10
cg03135964	2.99e-19	1.25e-21	-11.0895	38.541	-0.161	cg03135964	GALNT9	NM_001122636	132697162	132697285	NC_000012.11
cg23417585	2.99e-19	1.25e-21	-11.0894	38.5402	-0.0995	cg23417585			184403917	184404040	NC_000004.11
cg16639745	3.01e-19	1.26e-21	-11.0883	38.5337	-0.181	cg16639745	FAM90A20	NM_001164453	7151550	7151673	NC_000008.10
cg02351018	3.01e-19	1.26e-21	-11.0882	38.5328	-0.09	cg02351018			50960629	50960752	NC_000017.10
cg04728413	3.02e-19	1.27e-21	-11.0984	38.5317	-0.0767	cg04728413	LCP1	NM_002298	46736828	46736951	NC_000013.10
cg16200068	3.04e-19	1.27e-21	-11.0869	38.5246	-0.0733	cg16200068	DST;DST;DST;DST	NM_001144770;NM_183380;NM_001144771;NM_001144769	56689332	56689455	NC_000006.11
cg06123346	3.07e-19	1.29e-21	-11.0849	38.5122	-0.199	cg06123346	ATP4A	NM_000704	36054519	36054642	NC_000019.9
cg18236862	3.07e-19	1.29e-21	-11.0846	38.5103	-0.221	cg18236862	LOC116437	NR_026670	131651239	131651362	NC_000012.11
ch.13.470465F	3.08e-19	1.3e-21	-11.0843	38.5086	-0.205	ch.13.470465F	LHFP	NM_005780	40046596	40046719	NC_000013.10
cg18588499	3.08e-19	1.3e-21	-11.0841	38.5072	-0.24	cg18588499			27523974	27524097	NC_000005.9
cg04499514	3.09e-19	1.3e-21	-11.0834	38.5027	-0.29	cg04499514	C3AR1	NM_004054	8219020	8219143	NC_000012.11
cg15385589	3.1e-19	1.31e-21	-11.0831	38.5007	-0.164	cg15385589	PRDM16;PRDM16	NM_022114;NM_199454	3106800	3106923	NC_000001.10
cg21808131	3.1e-19	1.31e-21	-11.0827	38.4984	-0.11	cg21808131	ARHGAP5;ARHGAP5	NM_001030055;NM_001173	32597140	32597263	NC_000014.8
cg06410273	3.1e-19	1.31e-21	-11.0826	38.4975	-0.233	cg06410273			46720677	46720800	NC_000021.8
cg14239111	3.12e-19	1.32e-21	-11.0819	38.4936	-0.249	cg14239111	KCNT1	NM_020822	138660998	138661121	NC_000009.11
cg07416187	3.13e-19	1.32e-21	-11.0813	38.4898	-0.122	cg07416187			193373742	193373865	NC_000002.11
cg02744713	3.14e-19	1.33e-21	-11.0805	38.4848	-0.0905	cg02744713			31719472	31719595	NC_000002.11
cg02906557	3.15e-19	1.33e-21	-11.0799	38.4809	-0.0758	cg02906557			87380615	87380738	NC_000006.11
cg17718276	3.17e-19	1.34e-21	-11.0787	38.473	-0.239	cg17718276	TMEM132D	NM_133448	129648291	129648414	NC_000012.11
cg00323915	3.19e-19	1.35e-21	-11.0777	38.4669	-0.218	cg00323915	GIMAP4	NM_018326	150264987	150265110	NC_000007.13
cg09302922	3.2e-19	1.35e-21	-11.0773	38.4646	-0.249	cg09302922			430886	431009	NC_000002.11
cg10201191	3.26e-19	1.38e-21	-11.0743	38.4458	-0.248	cg10201191	PRDM16;PRDM16	NM_022114;NM_199454	3163472	3163595	NC_000001.10
cg00169897	3.26e-19	1.38e-21	-11.0742	38.4454	-0.273	cg00169897			89098782	89098905	NC_000016.9
cg25017369	3.27e-19	1.39e-21	-11.0735	38.4408	-0.167	cg25017369			83486706	83486829	NC_000004.11
cg12996417	3.27e-19	1.39e-21	-11.0734	38.4399	-0.126	cg12996417	PRSS48	NM_183375	152198109	152198232	NC_000004.11
cg01104489	3.39e-19	1.44e-21	-11.0678	38.4049	-0.162	cg01104489	PRDM16;PRDM16	NM_022114;NM_199454	3072235	3072358	NC_000001.10
cg08479752	3.39e-19	1.44e-21	-11.0677	38.404	-0.213	cg08479752	VSTM1	NM_198481	54567279	54567402	NC_000019.9
cg13525276	3.39e-19	1.44e-21	-11.0674	38.4026	-0.258	cg13525276	TSHR;TSHR;TSHR	NM_001018036;NM_001142626;NM_000369	81426012	81426135	NC_000014.8
cg24842334	3.43e-19	1.46e-21	-11.0657	38.3916	-0.25	cg24842334	PTPRN2;PTPRN2;PTPRN2	NM_002847;NM_130842;NM_130843	157647224	157647347	NC_000007.13
cg17477164	3.43e-19	1.46e-21	-11.0655	38.3907	-0.0734	cg17477164			70039219	70039342	NC_000010.10
cg10888031	3.46e-19	1.48e-21	-11.0639	38.3803	-0.272	cg10888031	ACTRT2	NM_080431	2938799	2938922	NC_000001.10
cg22932808	3.49e-19	1.49e-21	-11.0623	38.3707	-0.167	cg22932808			41909842	41909965	NC_000007.13
cg11257728	3.55e-19	1.52e-21	-11.059	38.35	-0.245	cg11257728	PARVG;PARVG;PARVG;PARVG;PARVG;PARVG;PARVG	NM_001137605;NR_024427;NM_001137606;NR_024428;NR_024426;NM_022141;NM_001137606	44577265	44577388	NC_000022.10
cg07295362	3.59e-19	1.54e-21	-11.0573	38.3389	-0.249	cg07295362			3061128	3061251	NC_000002.11
cg05165339	3.6e-19	1.54e-21	-11.0568	38.3359	-0.144	cg05165339			1420672	1420795	NC_000004.11
ch.3.2859325R	3.6e-19	1.54e-21	-11.0566	38.3349	-0.194	ch.3.2859325R			143837205	143837328	NC_000003.11
cg25382687	3.61e-19	1.55e-21	-11.0562	38.332	-0.159	cg25382687	MUC21	NM_001010909	30954602	30954725	NC_000006.11
cg15519786	3.65e-19	1.57e-21	-11.0539	38.3178	-0.227	cg15519786	PRDM16;PRDM16	NM_022114;NM_199454	3266440	3266563	NC_000001.10
cg19515468	3.65e-19	1.57e-21	-11.0539	38.3176	-0.075	cg19515468			166210883	166211006	NC_000005.9
cg01138020	3.66e-19	1.57e-21	-11.0536	38.3158	-0.258	cg01138020	SPNS3	NM_182538	4337094	4337217	NC_000017.10
cg19394756	3.67e-19	1.58e-21	-11.0532	38.3136	-0.129	cg19394756			68343	68466	NC_000002.11
cg14255426	3.71e-19	1.6e-21	-11.0512	38.3007	-0.211	cg14255426	TRPM2	NM_003307	45773290	45773413	NC_000021.8
cg20814718	3.82e-19	1.65e-21	-11.0461	38.2691	-0.203	cg20814718			35091430	35091553	NC_000008.10
cg09238677	3.82e-19	1.65e-21	-11.0461	38.2688	-0.218	cg09238677	C3AR1;C3AR1	NM_004054;NM_004054	8218922	8219045	NC_000012.11
cg26875852	3.84e-19	1.67e-21	-11.0447	38.2601	-0.175	cg26875852			5672077	5672200	NC_000005.9
cg05877767	3.9e-19	1.69e-21	-11.0424	38.2454	-0.0664	cg05877767			14993178	14993301	NC_000005.9
cg19984170	3.95e-19	1.72e-21	-11.0401	38.231	-0.254	cg19984170	ODZ2	NM_001122679	167532460	167532583	NC_000005.9
cg09115607	3.97e-19	1.73e-21	-11.0497	38.2275	-0.242	cg09115607			2442958	2443081	NC_000005.9
cg15552493	3.97e-19	1.73e-21	-11.0393	38.226	-0.216	cg15552493	MAP4K4;MAP4K4;MAP4K4	NM_145687;NM_004834;NM_145686	102387391	102387514	NC_000002.11
cg25961816	3.97e-19	1.73e-21	-11.039	38.2244	-0.166	cg25961816			121972775	121972898	NC_000006.11
cg02064413	3.97e-19	1.73e-21	-11.039	38.2244	-0.0736	cg02064413			89233439	89233562	NC_000004.11
cg17325640	3.98e-19	1.73e-21	-11.0387	38.2223	-0.154	cg17325640			22798522	22798645	NC_000019.9
cg08406698	4.01e-19	1.75e-21	-11.0372	38.213	-0.214	cg08406698			168785320	168785443	NC_000006.11
cg12585162	4.03e-19	1.76e-21	-11.0364	38.2081	-0.102	cg12585162	EDARADD;EDARADD	NM_080738;NM_145861	236592400	236592523	NC_000001.10
cg08476244	4.06e-19	1.77e-21	-11.035	38.1995	-0.21	cg08476244	EPB41L5	NM_020909	120867222	120867345	NC_000002.11
ch.5.2313526R	4.1e-19	1.79e-21	-11.0549	38.1945	-0.216	ch.5.2313526R			126507609	126507732	NC_000005.9
cg23251701	4.13e-19	1.8e-21	-11.0323	38.1822	-0.229	cg23251701			2537228	2537351	NC_000005.9
cg01585297	4.13e-19	1.81e-21	-11.0321	38.181	-0.0675	cg01585297			121814104	121814227	NC_000005.9
cg10026775	4.15e-19	1.81e-21	-11.0315	38.1772	-0.205	cg10026775			8164796	8164919	NC_000001.10
cg21445913	4.15e-19	1.81e-21	-11.0313	38.1759	-0.0961	cg21445913	ART3	NM_001130017	76970912	76971035	NC_000004.11
cg05302802	4.15e-19	1.82e-21	-11.0312	38.1757	-0.183	cg05302802			135615534	135615657	NC_000003.11
cg14667853	4.17e-19	1.83e-21	-11.0302	38.169	-0.218	cg14667853			2655051	2655174	NC_000002.11
cg19696701	4.19e-19	1.83e-21	-11.0296	38.1655	-0.208	cg19696701			4351779	4351902	NC_000007.13
cg05418218	4.19e-19	1.84e-21	-11.0292	38.1631	-0.187	cg05418218			168613308	168613431	NC_000006.11
cg26558363	4.19e-19	1.84e-21	-11.0292	38.163	-0.0762	cg26558363			14482701	14482824	NC_000004.11
cg03146413	4.2e-19	1.84e-21	-11.029	38.1616	-0.226	cg03146413			156296744	156296867	NC_000007.13
cg17020497	4.23e-19	1.86e-21	-11.0275	38.1526	-0.213	cg17020497			63028201	63028324	NC_000007.13
cg10400174	4.28e-19	1.89e-21	-11.0253	38.1382	-0.209	cg10400174	MIR494	NR_030174	101495758	101495881	NC_000014.8
cg13954548	4.28e-19	1.89e-21	-11.0252	38.1378	-0.168	cg13954548	SNAR-E	NR_024258	47334060	47334183	NC_000019.9
cg15800907	4.3e-19	1.89e-21	-11.0245	38.1335	-0.232	cg15800907	FPR3	NM_002030	52328110	52328233	NC_000019.9
cg02579332	4.3e-19	1.9e-21	-11.0243	38.1325	-0.246	cg02579332	HTR5A	NM_024012	154875967	154876090	NC_000007.13
cg01173650	4.34e-19	1.92e-21	-11.0228	38.1226	-0.184	cg01173650	RUFY4	NM_198483	218938006	218938129	NC_000002.11
cg09759737	4.34e-19	1.92e-21	-11.0226	38.1215	-0.199	cg09759737	PTPRN2;PTPRN2;PTPRN2	NM_002847;NM_130842;NM_130843	158037881	158038004	NC_000007.13
cg18637291	4.36e-19	1.93e-21	-11.0217	38.116	-0.0603	cg18637291	ERC2	NM_015576	55865842	55865965	NC_000003.11
cg19437757	4.48e-19	1.98e-21	-11.0173	38.088	-0.261	cg19437757	PTPRN2;PTPRN2;PTPRN2	NM_002847;NM_130842;NM_130843	157697057	157697180	NC_000007.13
cg18196453	4.53e-19	2.01e-21	-11.0154	38.0765	-0.217	cg18196453	RNF217	NM_152553	125334555	125334678	NC_000006.11
cg02306654	4.54e-19	2.01e-21	-11.0149	38.0731	-0.218	cg02306654	PTPRN2;PTPRN2;PTPRN2	NM_002847;NM_130842;NM_130843	157357887	157358010	NC_000007.13
cg09258240	4.58e-19	2.03e-21	-11.0133	38.0631	-0.183	cg09258240	DEGS2	NM_206918	100613518	100613641	NC_000014.8
cg06123753	4.59e-19	2.04e-21	-11.0126	38.0588	-0.203	cg06123753			60593185	60593308	NC_000002.11
cg13858909	4.59e-19	2.04e-21	-11.0126	38.0587	-0.186	cg13858909	FAM189A1	NM_015307	29489350	29489473	NC_000015.9
cg01649611	4.61e-19	2.05e-21	-11.0118	38.054	-0.246	cg01649611	THADA;THADA	NM_022065;NM_001083953	43521066	43521189	NC_000002.11
cg08572454	4.62e-19	2.06e-21	-11.0115	38.0518	-0.234	cg08572454	PTPRN2;PTPRN2;PTPRN2	NM_002847;NM_130842;NM_130843	157341619	157341742	NC_000007.13
cg04910179	4.65e-19	2.07e-21	-11.0102	38.0441	-0.221	cg04910179	DAB1	NM_021080	57816236	57816359	NC_000001.10
cg08904151	4.69e-19	2.09e-21	-11.0088	38.0351	-0.231	cg08904151	PTPRN2;PTPRN2;PTPRN2	NM_002847;NM_130842;NM_130843	157391259	157391382	NC_000007.13
cg02660277	4.76e-19	2.13e-21	-11.0062	38.0188	-0.225	cg02660277	PTPRN2;PTPRN2;PTPRN2	NM_002847;NM_130842;NM_130843	157438616	157438739	NC_000007.13
ch.22.28920330F	4.78e-19	2.14e-21	-11.0054	38.0136	-0.205	ch.22.28920330F			30590330	30590453	NC_000022.10
cg10960198	4.86e-19	2.18e-21	-11.0026	37.9964	-0.075	cg10960198			178417736	178417859	NC_000004.11
cg25082785	4.86e-19	2.18e-21	-11.0023	37.9942	-0.0686	cg25082785			88984321	88984444	NC_000008.10
cg06455125	4.89e-19	2.19e-21	-11.0015	37.9893	-0.0786	cg06455125			117913944	117914067	NC_000002.11
cg26942801	4.89e-19	2.19e-21	-11.0014	37.9889	-0.146	cg26942801	C5orf39;C5orf39	NM_001014279;NM_001014279	43039410	43039533	NC_000005.9
cg10838500	4.93e-19	2.21e-21	-11	37.9797	-0.172	cg10838500	SLC6A3	NM_001044	1393877	1394000	NC_000005.9
cg17092583	4.94e-19	2.22e-21	-10.9995	37.977	-0.185	cg17092583			735575	735698	NC_000011.9
cg11896623	4.94e-19	2.22e-21	-10.9994	37.9764	-0.0743	cg11896623			73648126	73648249	NC_000011.9
cg03474461	4.99e-19	2.25e-21	-10.9977	37.9656	-0.105	cg03474461			38186226	38186349	NC_000010.10
cg08567947	5e-19	2.25e-21	-10.9973	37.9631	-0.11	cg08567947			241097440	241097563	NC_000002.11
cg13500720	5.01e-19	2.26e-21	-10.997	37.9611	-0.188	cg13500720	AKAP12;AKAP12	NM_144497;NM_005100	151679097	151679220	NC_000006.11
cg17740722	5.01e-19	2.26e-21	-10.9969	37.9603	-0.221	cg17740722	PEG3;PEG3;PEG3;ZIM2;PEG3;PEG3;ZIM2;ZIM2	NM_001146186;NM_001146184;NM_001146185;NM_001146326;NM_006210;NM_001146187;NM_001146327;NM_015363	57337294	57337417	NC_000019.9
cg10940251	5.02e-19	2.26e-21	-10.9965	37.9582	-0.153	cg10940251	MYH6	NM_002471	23857507	23857630	NC_000014.8
cg13706438	5.03e-19	2.27e-21	-10.9959	37.9543	-0.097	cg13706438			120655001	120655124	NC_000010.10
cg25388800	5.04e-19	2.27e-21	-10.9958	37.9533	-0.259	cg25388800			137990243	137990366	NC_000005.9
cg11201447	5.07e-19	2.29e-21	-10.9946	37.9461	-0.233	cg11201447	MIR1204;PVT1	NR_031609;NR_003367	128808063	128808186	NC_000008.10
cg13928566	5.07e-19	2.29e-21	-10.9944	37.9445	-0.222	cg13928566			130624596	130624719	NC_000012.11
cg01823827	5.09e-19	2.31e-21	-10.9936	37.94	-0.0721	cg01823827	TTC27	NM_017735	32980137	32980260	NC_000002.11
cg25570486	5.09e-19	2.31e-21	-10.9934	37.9384	-0.129	cg25570486			61621446	61621569	NC_000020.10
ch.15.77890571R	5.15e-19	2.33e-21	-10.9916	37.9274	-0.119	ch.15.77890571R			80103516	80103639	NC_000015.9
cg20228731	5.17e-19	2.35e-21	-10.9908	37.9225	-0.248	cg20228731	FLJ43663;FLJ43663	NR_015431;NR_024153	130646051	130646174	NC_000007.13
cg11055858	5.17e-19	2.35e-21	-10.9908	37.922	-0.302	cg11055858	PTPRN2;PTPRN2;PTPRN2	NM_002847;NM_130842;NM_130843	157876450	157876573	NC_000007.13
cg17401720	5.18e-19	2.36e-21	-11.0007	37.9211	-0.227	cg17401720	PTPRN2;PTPRN2;PTPRN2	NM_002847;NM_130842;NM_130843	158221031	158221154	NC_000007.13
cg08657851	5.17e-19	2.35e-21	-10.9906	37.9208	-0.203	cg08657851			1354923	1355046	NC_000007.13
cg09538725	5.22e-19	2.38e-21	-10.9887	37.9091	-0.0818	cg09538725			206804363	206804486	NC_000002.11
cg24954696	5.28e-19	2.41e-21	-10.9868	37.8971	-0.0812	cg24954696	KALRN;KALRN	NM_001024660;NM_003947	124087201	124087324	NC_000003.11
cg15189015	5.29e-19	2.41e-21	-10.9865	37.8957	-0.267	cg15189015	RAB37;CD300LF	NM_175738;NM_139018	72707255	72707378	NC_000017.10
cg13483099	5.29e-19	2.42e-21	-10.9863	37.8939	-0.0811	cg13483099			43216931	43217054	NC_000002.11
cg13134297	5.29e-19	2.42e-21	-10.9863	37.8939	-0.209	cg13134297			30737556	30737679	NC_000007.13
cg26437842	5.38e-19	2.46e-21	-10.9836	37.8775	-0.236	cg26437842	WDFY4	NM_020945	49893423	49893546	NC_000010.10
cg18413062	5.44e-19	2.49e-21	-10.9817	37.8654	-0.178	cg18413062	OPCML	NM_001012393	132931732	132931855	NC_000011.9
cg00562871	5.45e-19	2.49e-21	-10.9812	37.8622	-0.265	cg00562871			144190362	144190485	NC_000008.10
cg19038490	5.45e-19	2.5e-21	-10.981	37.8607	-0.22	cg19038490			71733130	71733253	NC_000017.10
cg25290175	5.45e-19	2.5e-21	-10.9809	37.86	-0.0889	cg25290175			71248774	71248897	NC_000002.11
ch.3.72737075R	5.5e-19	2.52e-21	-10.9794	37.851	-0.188	ch.3.72737075R			72654385	72654508	NC_000003.11
cg24406496	5.51e-19	2.53e-21	-10.979	37.8486	-0.0925	cg24406496	ZNF833	NR_028594	11788064	11788187	NC_000019.9
cg22460590	5.57e-19	2.56e-21	-10.9771	37.8366	-0.0768	cg22460590			49197649	49197772	NC_000007.13
cg13594463	5.61e-19	2.58e-21	-10.976	37.8293	-0.231	cg13594463	KRT1	NM_006121	53075431	53075554	NC_000012.11
cg15158847	5.61e-19	2.58e-21	-10.976	37.8293	-0.247	cg15158847	FAIM3;FAIM3;FAIM3;FAIM3;FAIM3	NM_001142472;NM_005449;NM_001142473;NM_005449;NM_001142473	207095315	207095438	NC_000001.10
cg05050072	5.61e-19	2.58e-21	-10.9759	37.8287	-0.24	cg05050072	BDKRB2	NM_000623	96707554	96707677	NC_000014.8
cg04181882	5.66e-19	2.61e-21	-10.9742	37.8186	-0.101	cg04181882			9485487	9485610	NC_000004.11
cg18504196	5.71e-19	2.64e-21	-10.9725	37.8076	-0.239	cg18504196	C3orf50	NR_021485	168331449	168331572	NC_000003.11
cg08983429	5.72e-19	2.64e-21	-10.9722	37.8055	-0.14	cg08983429	CLUAP1;CLUAP1	NM_015041;NM_024793	3577455	3577578	NC_000016.9
cg14960373	5.81e-19	2.68e-21	-10.9697	37.7904	-0.178	cg14960373	COL6A2;COL6A2;COL6A2	NM_001849;NM_058174;NM_058175	47530705	47530828	NC_000021.8
cg23476447	5.82e-19	2.69e-21	-10.9692	37.7871	-0.225	cg23476447	SNORD115-39	NR_003354	25485996	25486119	NC_000015.9
cg23300865	5.88e-19	2.72e-21	-10.9675	37.7765	-0.0582	cg23300865			28799238	28799361	NC_000005.9
cg19571360	5.88e-19	2.72e-21	-10.9674	37.7756	-0.241	cg19571360			106307030	106307153	NC_000014.8
cg03598313	5.93e-19	2.75e-21	-10.9658	37.7655	-0.233	cg03598313			208955564	208955687	NC_000001.10
cg07313373	6.03e-19	2.8e-21	-10.963	37.7481	-0.253	cg07313373	NLRP3;NLRP3	NM_001079821;NM_001127461	247579131	247579254	NC_000001.10
cg11168694	6.05e-19	2.81e-21	-10.9626	37.7455	-0.242	cg11168694	GPX6	NM_182701	28478432	28478555	NC_000006.11
cg00037681	6.06e-19	2.82e-21	-10.9621	37.7425	-0.225	cg00037681	FAM113B;LOC100233209;FAM113B	NM_138371;NR_026544;NM_138371	47610371	47610494	NC_000012.11
cg05349089	6.12e-19	2.84e-21	-10.9605	37.7326	-0.227	cg05349089			209008498	209008621	NC_000001.10
cg14483831	6.12e-19	2.85e-21	-10.9605	37.7325	-0.226	cg14483831	OPCML	NM_001012393	133032572	133032695	NC_000011.9
cg12802844	6.12e-19	2.85e-21	-10.9604	37.7321	-0.235	cg12802844			156315663	156315786	NC_000007.13
cg02611419	6.16e-19	2.87e-21	-10.9592	37.7241	-0.272	cg02611419	KCNK16;KCNK16;KCNK17;KCNK17;KCNK16	NM_001135105;NM_001135107;NM_001135111;NM_031460;NM_032115	39282532	39282655	NC_000006.11
cg22523851	6.16e-19	2.87e-21	-10.9591	37.7238	-0.0834	cg22523851			114694440	114694563	NC_000004.11
cg05217312	6.17e-19	2.87e-21	-10.9589	37.7225	-0.2	cg05217312	KIAA1217	NM_001098500	24417827	24417950	NC_000010.10
cg25905369	6.18e-19	2.88e-21	-10.9584	37.7194	-0.0833	cg25905369	SORCS2	NM_020777	7603982	7604105	NC_000004.11
cg26387796	6.18e-19	2.88e-21	-10.9584	37.7193	-0.164	cg26387796	GIMAP8	NM_175571	150147927	150148050	NC_000007.13
cg18190417	6.18e-19	2.88e-21	-10.9584	37.7192	-0.221	cg18190417			130683439	130683562	NC_000012.11
cg03582982	6.21e-19	2.9e-21	-10.9575	37.7135	-0.0693	cg03582982	BIRC6	NM_016252	32673206	32673329	NC_000002.11
cg05241143	6.27e-19	2.93e-21	-10.9558	37.7032	-0.16	cg05241143	PTPRN2;PTPRN2;PTPRN2	NM_002847;NM_130842;NM_130843	157916636	157916759	NC_000007.13
cg16565696	6.3e-19	2.95e-21	-10.955	37.698	-0.201	cg16565696	CDH22	NM_021248	44834899	44835022	NC_000020.10
cg16670736	6.31e-19	2.96e-21	-10.9544	37.6946	-0.233	cg16670736	PTPRN2;PTPRN2;PTPRN2	NM_002847;NM_130842;NM_130843	157777149	157777272	NC_000007.13
cg11751233	6.43e-19	3.01e-21	-10.9514	37.6754	-0.0698	cg11751233			127535148	127535271	NC_000006.11
cg00404053	6.51e-19	3.06e-21	-10.9596	37.6645	-0.225	cg00404053	RASAL2;RASAL2	NM_004841;NM_170692	178313656	178313779	NC_000001.10
cg20730966	6.52e-19	3.07e-21	-10.9487	37.6589	-0.205	cg20730966	GLB1;GLB1;GLB1	NM_001079811;NM_001135602;NM_000404	33095886	33096009	NC_000003.11
cg01910236	6.55e-19	3.08e-21	-10.9479	37.6533	-0.207	cg01910236			1661865	1661988	NC_000005.9
cg26589930	6.57e-19	3.09e-21	-10.9473	37.6497	-0.201	cg26589930			134730571	134730694	NC_000010.10
cg03569637	6.57e-19	3.1e-21	-10.9472	37.649	-0.246	cg03569637	LOC100233209;FAM113B	NR_026544;NM_138371	47609357	47609480	NC_000012.11
cg02852025	6.6e-19	3.11e-21	-10.9465	37.645	-0.224	cg02852025	IKZF1	NM_006060	50348174	50348297	NC_000007.13
cg11503710	6.6e-19	3.12e-21	-10.9461	37.6425	-0.169	cg11503710	ZNF365;ZNF365	NM_199452;NM_199451	64396659	64396782	NC_000010.10
cg00966763	6.6e-19	3.12e-21	-10.9461	37.6424	-0.243	cg00966763	CDH4	NM_001794	60472065	60472188	NC_000020.10
cg00398265	6.69e-19	3.16e-21	-10.9438	37.6282	-0.0716	cg00398265			162435454	162435577	NC_000001.10
cg10249637	6.69e-19	3.17e-21	-10.9436	37.6266	-0.312	cg10249637	PTPRN2;PTPRN2;PTPRN2	NM_002847;NM_130842;NM_130843	157655436	157655559	NC_000007.13
cg23488198	6.69e-19	3.17e-21	-10.9435	37.6262	-0.209	cg23488198			2537496	2537619	NC_000005.9
cg15844191	6.7e-19	3.17e-21	-10.9433	37.6251	-0.268	cg15844191	C20orf197;C20orf197	NM_173644;NM_173644	58631001	58631124	NC_000020.10
cg22639048	6.72e-19	3.19e-21	-10.9426	37.6207	-0.128	cg22639048			96837235	96837358	NC_000008.10
cg02445395	6.8e-19	3.23e-21	-10.9406	37.6082	-0.205	cg02445395	PTPRN2;PTPRN2;PTPRN2	NM_002847;NM_130842;NM_130843	157659455	157659578	NC_000007.13
cg02771117	6.97e-19	3.31e-21	-10.9365	37.5822	-0.229	cg02771117	FAM167A;C8orf12	NM_053279;NR_026814	11279352	11279475	NC_000008.10
cg01137907	7.08e-19	3.37e-21	-10.9339	37.5658	-0.159	cg01137907			56879374	56879497	NC_000007.13
cg24802813	7.08e-19	3.37e-21	-10.9337	37.5645	-0.232	cg24802813			38389991	38390114	NC_000007.13
cg25712005	7.08e-19	3.38e-21	-10.9336	37.5638	-0.245	cg25712005	ELN;ELN;ELN;ELN;ELN	NM_001081753;NM_000501;NM_001081755;NM_001081754;NM_001081752	73443113	73443236	NC_000007.13
cg01613817	7.13e-19	3.4e-21	-10.9323	37.5557	-0.253	cg01613817	ERG;ERG;ERG;ERG;ERG;ERG	NM_004449;NM_182918;NM_001136155;NM_001136155;NM_182918;NM_001136154	39870397	39870520	NC_000021.8
cg20023155	7.17e-19	3.42e-21	-10.9313	37.5497	-0.252	cg20023155	KCNK13	NM_022054	90651084	90651207	NC_000014.8
cg23462428	7.19e-19	3.43e-21	-10.9309	37.5473	-0.0901	cg23462428			78928450	78928573	NC_000004.11
cg23531592	7.24e-19	3.46e-21	-10.9298	37.54	-0.0752	cg23531592	GOLPH3	NM_022130	32142394	32142517	NC_000005.9
cg02860108	7.24e-19	3.46e-21	-10.9296	37.5388	-0.17	cg02860108	PTPRN2;PTPRN2;PTPRN2	NM_002847;NM_130842;NM_130843	157695230	157695353	NC_000007.13
cg10825315	7.33e-19	3.51e-21	-10.9275	37.5259	-0.215	cg10825315	TSHR;TSHR;TSHR	NM_001018036;NM_001142626;NM_000369	81425912	81426035	NC_000014.8
cg13299942	7.34e-19	3.51e-21	-10.9272	37.5243	-0.0942	cg13299942	CCDC60	NM_178499	119798505	119798628	NC_000012.11
cg12337622	7.36e-19	3.52e-21	-10.9268	37.5216	-0.282	cg12337622	PTPRN2;PTPRN2;PTPRN2	NM_002847;NM_130842;NM_130843	158050413	158050536	NC_000007.13
cg08214957	7.36e-19	3.53e-21	-10.9267	37.5206	-0.212	cg08214957	CDR1	NM_004065	139866495	139866618	NC_000023.10
cg05497273	7.38e-19	3.54e-21	-10.926	37.5165	-0.205	cg05497273	A2BP1;A2BP1	NM_001142333;NM_018723	6530373	6530496	NC_000016.9
cg03143347	7.41e-19	3.56e-21	-10.9253	37.5123	-0.173	cg03143347	GALNT9	NM_001122636	132893664	132893787	NC_000012.11
cg01832487	7.42e-19	3.56e-21	-10.9251	37.5109	-0.0787	cg01832487			59787020	59787143	NC_000011.9
cg26154546	7.44e-19	3.58e-21	-10.9245	37.507	-0.0638	cg26154546	POU6F2;POU6F2	NM_007252;NM_001166018	39051529	39051652	NC_000007.13
cg12532028	7.5e-19	3.6e-21	-10.9233	37.4995	-0.0672	cg12532028	ASF1B	NM_018154	14248829	14248952	NC_000019.9
cg17190766	7.58e-19	3.65e-21	-10.9214	37.4879	-0.0758	cg17190766			72580292	72580415	NC_000012.11
cg20495738	7.6e-19	3.66e-21	-10.921	37.4849	-0.23	cg20495738	CACNA1C;CACNA1C;CACNA1C;CACNA1C;CACNA1C;CACNA1C;CACNA1C;CACNA1C;CACNA1C;CACNA1C;CACNA1C;CACNA1C;CACNA1C;CACNA1C;CACNA1C;CACNA1C;CACNA1C;CACNA1C;CACNA1C;CACNA1C;CACNA1C;CACNA1C;CACNA1C	NM_001129844;NM_001129827;NM_001129839;NM_001129834;NM_001129841;NM_000719;NM_001129830;NM_001167625;NM_001129843;NM_001167624;NM_001129835;NM_001129837;NM_001167623;NM_001129840;NM_199460;NM_001129833;NM_001129832;NM_001129829;NM_001129846;NM_001129836;NM_001129838;NM_001129831;NM_001129842	2338399	2338522	NC_000012.11
cg00251125	7.7e-19	3.71e-21	-10.9188	37.4716	-0.19	cg00251125	OBSCN;OBSCN	NM_052843;NM_001098623	228395450	228395573	NC_000001.10
cg24702918	7.71e-19	3.71e-21	-10.9185	37.4695	-0.136	cg24702918			7880727	7880850	NC_000008.10
cg06323479	7.75e-19	3.74e-21	-10.9381	37.467	-0.234	cg06323479			167507729	167507852	NC_000006.11
cg14544225	7.75e-19	3.74e-21	-10.9176	37.4638	-0.205	cg14544225			11139650	11139773	NC_000017.10
cg23400715	7.75e-19	3.74e-21	-10.9174	37.4624	-0.218	cg23400715	FAM19A5	NM_001082967	48900624	48900747	NC_000022.10
cg03609398	7.75e-19	3.74e-21	-10.9173	37.462	-0.168	cg03609398			145913076	145913199	NC_000008.10
cg15552238	7.86e-19	3.81e-21	-10.9249	37.4474	-0.238	cg15552238	EMR3	NM_032571	14785749	14785872	NC_000019.9
cg02556005	7.86e-19	3.81e-21	-10.9146	37.4452	-0.207	cg02556005			74310568	74310691	NC_000016.9
cg24983477	7.91e-19	3.84e-21	-10.9135	37.438	-0.108	cg24983477			44169851	44169974	NC_000004.11
cg15095602	7.93e-19	3.84e-21	-10.9131	37.4358	-0.194	cg15095602	WBSCR17	NM_022479	70714201	70714324	NC_000007.13
cg19500607	8e-19	3.88e-21	-10.9117	37.4267	-0.2	cg19500607	HTR4;HTR4;HTR4;HTR4;HTR4;HTR4;HTR4	NM_000870;NM_001040172;NM_001040174;NM_001040173;NM_001040169;NM_001040171;NM_199453	148034319	148034442	NC_000005.9
ch.9.109447758R	8e-19	3.88e-21	-10.9116	37.4262	-0.125	ch.9.109447758R			110407937	110408060	NC_000009.11
cg06685140	8.06e-19	3.92e-21	-10.9102	37.4176	-0.086	cg06685140			75655681	75655804	NC_000005.9
ch.6.609614F	8.1e-19	3.94e-21	-10.9093	37.4122	-0.164	ch.6.609614F	ACOT13;ACOT13	NM_018473;NM_001160094	24693000	24693123	NC_000006.11
cg22388472	8.15e-19	3.96e-21	-10.9084	37.4063	-0.271	cg22388472			2365763	2365886	NC_000001.10
cg11642447	8.16e-19	3.97e-21	-10.9081	37.4043	-0.0612	cg11642447			103713235	103713358	NC_000007.13
cg26859878	8.18e-19	3.98e-21	-10.9077	37.4023	-0.126	cg26859878	NKAIN3	NM_173688	63307589	63307712	NC_000008.10
cg13300670	8.26e-19	4.02e-21	-10.9059	37.3908	-0.243	cg13300670			2896834	2896957	NC_000001.10
cg16905199	8.29e-19	4.04e-21	-10.9154	37.3883	-0.164	cg16905199			149676378	149676501	NC_000001.10
cg00340127	8.31e-19	4.05e-21	-10.9048	37.3838	-0.202	cg00340127			242250508	242250631	NC_000001.10
cg14069088	8.4e-19	4.1e-21	-10.903	37.3728	-0.236	cg14069088	CDKN2BAS	NR_003529	21996207	21996330	NC_000009.11
cg00508950	8.46e-19	4.13e-21	-10.9018	37.3652	-0.213	cg00508950			132916034	132916157	NC_000012.11
cg10887366	8.52e-19	4.16e-21	-10.9007	37.3583	-0.244	cg10887366	WDFY4	NM_020945	49892861	49892984	NC_000010.10
cg01695620	8.65e-19	4.22e-21	-10.9085	37.3452	-0.18	cg01695620			58122850	58122973	NC_000008.10
cg07403258	8.69e-19	4.25e-21	-10.8974	37.3375	-0.271	cg07403258			112200864	112200987	NC_000013.10
cg07273376	8.79e-19	4.3e-21	-10.8956	37.3262	-0.212	cg07273376			23919652	23919775	NC_000011.9
cg19722689	8.89e-19	4.35e-21	-10.8936	37.3136	-0.21	cg19722689			106198034	106198157	NC_000014.8
cg00282706	8.93e-19	4.38e-21	-10.8927	37.3079	-0.243	cg00282706	ANO2	NM_020373	6055430	6055553	NC_000012.11
cg21853198	8.94e-19	4.38e-21	-10.8925	37.3068	-0.108	cg21853198			8557855	8557978	NC_000012.11
cg26461666	9e-19	4.42e-21	-10.8912	37.2986	-0.175	cg26461666			142353864	142353987	NC_000007.13
cg23603027	9.01e-19	4.42e-21	-10.891	37.2972	-0.254	cg23603027			466712	466835	NC_000002.11
cg27482619	9.08e-19	4.46e-21	-10.8895	37.2881	-0.183	cg27482619			30818479	30818602	NC_000010.10
cg07590638	9.17e-19	4.51e-21	-10.8878	37.2774	-0.0958	cg07590638			38631548	38631671	NC_000005.9
cg02558735	9.24e-19	4.55e-21	-10.8866	37.2702	-0.14	cg02558735			55810883	55811006	NC_000007.13
cg10115148	9.24e-19	4.55e-21	-10.8865	37.2691	-0.189	cg10115148			2872908	2873031	NC_000001.10
cg09291131	9.25e-19	4.56e-21	-10.8863	37.2679	-0.251	cg09291131	MIR453;MIR485	NR_029969;NR_030160	101521809	101521932	NC_000014.8
cg27032456	9.25e-19	4.56e-21	-10.8863	37.2679	-0.112	cg27032456			8474082	8474205	NC_000012.11
cg06809342	9.48e-19	4.68e-21	-10.8821	37.2419	-0.0698	cg06809342			8999608	8999731	NC_000011.9
cg11412248	9.55e-19	4.72e-21	-10.8809	37.234	-0.176	cg11412248	CHRNB4	NM_000750	78930962	78931085	NC_000015.9
cg14478460	9.58e-19	4.74e-21	-10.88	37.2288	-0.236	cg14478460			76401126	76401249	NC_000018.9
cg27367722	9.61e-19	4.75e-21	-10.8796	37.2263	-0.057	cg27367722			64033402	64033525	NC_000002.11
cg20256649	9.69e-19	4.8e-21	-10.8782	37.2176	-0.192	cg20256649	MYT1L	NM_015025	1941523	1941646	NC_000002.11
cg16007189	9.77e-19	4.84e-21	-10.8767	37.2083	-0.145	cg16007189			23674100	23674223	NC_000011.9
cg10885471	9.79e-19	4.86e-21	-10.8762	37.205	-0.0613	cg10885471			52216738	52216861	NC_000014.8
cg20066188	1e-18	4.99e-21	-10.8719	37.178	-0.215	cg20066188	CYTH4	NM_013385	37678791	37678914	NC_000022.10
cg01221209	1.01e-18	5.03e-21	-10.8706	37.1698	-0.223	cg01221209			554886	555009	NC_000005.9
cg24833674	1.01e-18	5.03e-21	-10.8706	37.1697	-0.221	cg24833674	ILDR2	NM_199351	166914191	166914314	NC_000001.10
cg01448098	1.01e-18	5.04e-21	-10.8704	37.1688	-0.226	cg01448098	PRDM16;PRDM16	NM_022114;NM_199454	3078013	3078136	NC_000001.10
cg24333798	1.01e-18	5.06e-21	-10.8699	37.1653	-0.176	cg24333798			7385970	7386093	NC_000008.10
cg02931656	1.03e-18	5.13e-21	-10.8677	37.152	-0.0629	cg02931656			29060716	29060839	NC_000010.10
cg07027502	1.03e-18	5.13e-21	-10.8677	37.1518	-0.219	cg07027502	DSCR6	NM_018962	38390692	38390815	NC_000021.8
cg09164211	1.03e-18	5.16e-21	-10.8667	37.1455	-0.15	cg09164211			158963946	158964069	NC_000007.13
cg14442518	1.04e-18	5.18e-21	-10.8661	37.1414	-0.191	cg14442518			136102543	136102666	NC_000009.11
cg25915758	1.04e-18	5.21e-21	-10.8653	37.1365	-0.0896	cg25915758			64651269	64651392	NC_000013.10
cg25097892	1.04e-18	5.21e-21	-10.8652	37.136	-0.0806	cg25097892			43824891	43825014	NC_000010.10
cg06672958	1.04e-18	5.21e-21	-10.8651	37.1352	-0.0393	cg06672958	EFNA5	NM_001962	106830972	106831095	NC_000005.9
cg18540529	1.04e-18	5.22e-21	-10.8649	37.134	-0.229	cg18540529	PTPRN2;PTPRN2;PTPRN2	NM_002847;NM_130842;NM_130843	157933172	157933295	NC_000007.13
cg02738188	1.04e-18	5.22e-21	-10.8647	37.133	-0.0938	cg02738188			159722254	159722377	NC_000002.11
cg20924136	1.05e-18	5.25e-21	-10.8638	37.1274	-0.177	cg20924136	FBXO36	NM_174899	230808359	230808482	NC_000002.11
cg23350273	1.06e-18	5.34e-21	-10.8613	37.1116	-0.227	cg23350273	OR5H6	NM_001005479	97982397	97982520	NC_000003.11
cg16834787	1.07e-18	5.38e-21	-10.8805	37.1088	-0.115	cg16834787			120542757	120542880	NC_000010.10
cg09050860	1.07e-18	5.39e-21	-10.8598	37.1024	-0.0883	cg09050860			166237291	166237414	NC_000005.9
cg09103600	1.08e-18	5.42e-21	-10.8589	37.0966	-0.0975	cg09103600			100735637	100735760	NC_000007.13
cg15920472	1.08e-18	5.43e-21	-10.8587	37.0952	-0.223	cg15920472	STK31;STK31;STK31	NM_032944;NM_031414;NM_001122833	23827492	23827615	NC_000007.13
cg17329835	1.09e-18	5.48e-21	-10.8572	37.0858	-0.0854	cg17329835	FAM82A1;FAM82A1;FAM82A1;FAM82A1	NM_001170793;NM_001170791;NM_001170792;NM_144713	38204832	38204955	NC_000002.11
cg16709512	1.09e-18	5.49e-21	-10.8568	37.0834	-0.0662	cg16709512			101297174	101297297	NC_000005.9
ch.5.978199R	1.09e-18	5.5e-21	-10.8567	37.083	-0.119	ch.5.978199R			925199	925322	NC_000005.9
cg06018447	1.09e-18	5.5e-21	-10.8565	37.0818	-0.0761	cg06018447			68628886	68629009	NC_000011.9
cg10926512	1.09e-18	5.52e-21	-10.8663	37.0816	-0.0892	cg10926512			23130530	23130653	NC_000008.10
cg15704743	1.09e-18	5.52e-21	-10.856	37.0786	-0.122	cg15704743	TSNAX-DISC1;DISC1;DISC1;DISC1;TSNAX-DISC1;DISC1;DISC1;DISC1;DISC1;TSNAX-DISC1;DISC1;DISC1;TSNAX-DISC1;DISC1;TSNAX-DISC1;DISC1;DISC1;DISC1;DISC1;DISC1;TSNAX-DISC1;TSNAX-DISC1;DISC1;DISC1;DISC1;DISC1;DISC1;TSNAX-DISC1;DISC1;DISC1;DISC1	NR_028394;NM_001164552;NM_001012959;NM_001164551;NR_028397;NM_001164553;NM_001012957;NM_001164541;NM_001164542;NR_028393;NM_001164550;NM_001164537;NR_028400;NM_001164554;NR_028398;NM_001164548;NM_001164555;NM_018662;NM_001164539;NM_001164556;NR_028399;NR_028395;NM_001164540;NM_001164544;NM_001164538;NM_001164545;NM_001012958;NR_028396;NM_001164546;NM_001164547;NM_001164549	231777176	231777299	NC_000001.10
cg09450197	1.09e-18	5.53e-21	-10.8558	37.0775	-0.258	cg09450197			3134557	3134680	NC_000007.13
cg18625627	1.1e-18	5.55e-21	-10.8552	37.0733	-0.246	cg18625627	TSHR;TSHR;TSHR	NM_001018036;NM_001142626;NM_000369	81426015	81426138	NC_000014.8
cg19215266	1.11e-18	5.61e-21	-10.8534	37.0621	-0.213	cg19215266	CREM;CREM;CREM;CREM;CREM;CREM	NM_183013;NM_182850;NM_182853;NM_181571;NM_183060;NM_001881	35417163	35417286	NC_000010.10
cg10791343	1.13e-18	5.72e-21	-10.8505	37.044	-0.25	cg10791343	POM121L12	NM_182595	53103287	53103410	NC_000007.13
cg08877357	1.13e-18	5.76e-21	-10.8494	37.0374	-0.207	cg08877357			113120532	113120655	NC_000010.10
cg24493925	1.14e-18	5.8e-21	-10.8584	37.0324	-0.0861	cg24493925			100644677	100644800	NC_000006.11
cg21558614	1.14e-18	5.8e-21	-10.8484	37.0307	-0.12	cg21558614			754184	754307	NC_000005.9
cg01719405	1.15e-18	5.83e-21	-10.8475	37.0256	-0.256	cg01719405			62401258	62401381	NC_000014.8
cg00023726	1.15e-18	5.84e-21	-10.8471	37.0231	-0.212	cg00023726			2839935	2840058	NC_000001.10
cg24969187	1.15e-18	5.85e-21	-10.8468	37.0212	-0.178	cg24969187	GALNT9	NM_001122636	132870448	132870571	NC_000012.11
cg02578836	1.16e-18	5.89e-21	-10.8458	37.0147	-0.0753	cg02578836			21324432	21324555	NC_000002.11
cg10260440	1.16e-18	5.91e-21	-10.8454	37.0121	-0.0829	cg10260440	SMOC1;SMOC1	NM_001034852;NM_022137	70369903	70370026	NC_000014.8
cg01574513	1.16e-18	5.91e-21	-10.8452	37.0108	-0.284	cg01574513			85981720	85981843	NC_000016.9
cg14504768	1.16e-18	5.94e-21	-10.8446	37.0072	-0.183	cg14504768	TMEM132D	NM_133448	130124107	130124230	NC_000012.11
cg27021529	1.17e-18	5.99e-21	-10.8433	36.999	-0.0703	cg27021529	CSMD1	NM_033225	4440491	4440614	NC_000008.10
cg18569952	1.18e-18	6.02e-21	-10.8425	36.9941	-0.122	cg18569952	SGCZ	NM_139167	14661052	14661175	NC_000008.10
cg04370106	1.18e-18	6.03e-21	-10.8522	36.994	-0.239	cg04370106	ACCN1;ACCN1	NM_183377;NM_001094	31546369	31546492	NC_000017.10
cg10502354	1.19e-18	6.07e-21	-10.8409	36.9843	-0.24	cg10502354	PTPRN2;PTPRN2;PTPRN2	NM_002847;NM_130842;NM_130843	157402529	157402652	NC_000007.13
cg11970982	1.19e-18	6.11e-21	-10.8401	36.9791	-0.161	cg11970982			131266571	131266694	NC_000002.11
cg01371233	1.2e-18	6.13e-21	-10.8396	36.9757	-0.236	cg01371233	SEPHS2	NM_012248	30456325	30456448	NC_000016.9
cg26479667	1.2e-18	6.14e-21	-10.8393	36.9744	-0.27	cg26479667			3339581	3339704	NC_000005.9
ch.15.64945366R	1.2e-18	6.15e-21	-10.849	36.9743	-0.107	ch.15.64945366R			67158312	67158435	NC_000015.9
cg08394056	1.2e-18	6.16e-21	-10.8389	36.9714	-0.214	cg08394056			142326312	142326435	NC_000007.13
ch.20.115261R	1.21e-18	6.2e-21	-10.8376	36.9637	-0.127	ch.20.115261R			4663796	4663919	NC_000020.10
cg07042144	1.22e-18	6.24e-21	-10.8366	36.9573	-0.217	cg07042144	NLRP12	NM_144687	54327404	54327527	NC_000019.9
cg26076236	1.22e-18	6.29e-21	-10.8354	36.9495	-0.114	cg26076236	DST;DST;DST;DST	NM_001144770;NM_183380;NM_001144771;NM_001144769	56650375	56650498	NC_000006.11
cg17807393	1.23e-18	6.3e-21	-10.8351	36.9479	-0.15	cg17807393			132651902	132652025	NC_000004.11
cg01272937	1.23e-18	6.32e-21	-10.8346	36.945	-0.134	cg01272937	USP10	NM_005153	84812514	84812637	NC_000016.9
cg19014335	1.23e-18	6.34e-21	-10.8342	36.942	-0.219	cg19014335	FMNL3;FMNL3	NM_198900;NM_175736	50099568	50099691	NC_000012.11
cg03105681	1.23e-18	6.35e-21	-10.8339	36.9402	-0.215	cg03105681	PTPRN2;PTPRN2;PTPRN2	NM_002847;NM_130842;NM_130843	157671859	157671982	NC_000007.13
cg17412901	1.24e-18	6.37e-21	-10.8336	36.9382	-0.263	cg17412901	PRDM16;PRDM16	NM_022114;NM_199454	3332705	3332828	NC_000001.10
cg08702879	1.24e-18	6.38e-21	-10.8333	36.9365	-0.182	cg08702879			101359056	101359179	NC_000010.10
cg04363674	1.25e-18	6.42e-21	-10.8322	36.9298	-0.0669	cg04363674			29863774	29863897	NC_000006.11
cg04406981	1.25e-18	6.45e-21	-10.8314	36.9249	-0.127	cg04406981	SNAR-C3	NR_024221	48453315	48453438	NC_000019.9
cg16689507	1.25e-18	6.47e-21	-10.8309	36.9217	-0.0636	cg16689507			8667692	8667815	NC_000006.11
cg25148572	1.27e-18	6.54e-21	-10.8294	36.9121	-0.219	cg25148572			1365002	1365125	NC_000007.13
cg18184218	1.27e-18	6.54e-21	-10.8293	36.9113	-0.229	cg18184218	KIAA1217;KIAA1217;KIAA1217	NM_019590;NM_001098500;NM_001098501	24755438	24755561	NC_000010.10
cg16721194	1.27e-18	6.58e-21	-10.8383	36.9071	-0.228	cg16721194	CUX2	NM_015267	111537057	111537180	NC_000012.11
cg13309012	1.28e-18	6.61e-21	-10.8277	36.9013	-0.237	cg13309012	MIR155HG;MIR155	NR_001458;NR_030784	26946167	26946290	NC_000021.8
cg04258333	1.29e-18	6.66e-21	-10.8264	36.8937	-0.118	cg04258333			25200278	25200401	NC_000005.9
cg23960736	1.29e-18	6.68e-21	-10.826	36.8911	-0.221	cg23960736			4171594	4171717	NC_000001.10
cg14174221	1.29e-18	6.69e-21	-10.8257	36.8889	-0.228	cg14174221	UBASH3A;UBASH3A	NM_018961;NM_001001895	43835592	43835715	NC_000021.8
cg15437692	1.29e-18	6.71e-21	-10.8354	36.8887	-0.0923	cg15437692			12462061	12462184	NC_000008.10
cg03539903	1.3e-18	6.75e-21	-10.8243	36.8803	-0.206	cg03539903			53088317	53088440	NC_000020.10
cg01113832	1.3e-18	6.75e-21	-10.8242	36.88	-0.0789	cg01113832			127692182	127692305	NC_000004.11
cg15727009	1.31e-18	6.8e-21	-10.8332	36.8752	-0.0782	cg15727009	TULP4;TULP4	NM_020245;NM_001007466	158770025	158770148	NC_000006.11
cg14266586	1.31e-18	6.8e-21	-10.8231	36.8731	-0.0946	cg14266586			149019461	149019584	NC_000006.11
cg22483030	1.32e-18	6.85e-21	-10.822	36.8659	-0.194	cg22483030	HLA-DPB1	NM_002121	33043849	33043972	NC_000006.11
cg25845889	1.32e-18	6.86e-21	-10.8218	36.8644	-0.231	cg25845889			137493275	137493398	NC_000003.11
cg12311837	1.32e-18	6.86e-21	-10.8217	36.864	-0.203	cg12311837			164391778	164391901	NC_000004.11
cg10590095	1.33e-18	6.93e-21	-10.8202	36.8546	-0.0979	cg10590095	THEM4	NM_053055	151879636	151879759	NC_000001.10
cg07041214	1.33e-18	6.93e-21	-10.8201	36.854	-0.177	cg07041214	OR56A3	NM_001003443	5968801	5968924	NC_000011.9
cg14030836	1.33e-18	6.95e-21	-10.8198	36.8522	-0.211	cg14030836	PRDM16;PRDM16	NM_022114;NM_199454	2992620	2992743	NC_000001.10
cg08787837	1.34e-18	6.98e-21	-10.819	36.847	-0.27	cg08787837			86029554	86029677	NC_000016.9
cg11983942	1.34e-18	6.99e-21	-10.8187	36.8455	-0.204	cg11983942	OPCML	NM_001012393	132946934	132947057	NC_000011.9
cg16388896	1.35e-18	7.03e-21	-10.8179	36.8402	-0.125	cg16388896			106116875	106116998	NC_000014.8
cg12156301	1.35e-18	7.05e-21	-10.8174	36.8374	-0.0464	cg12156301	KRTAP19-5	NM_181611	31875738	31875861	NC_000021.8
cg16211959	1.35e-18	7.06e-21	-10.8173	36.8363	-0.135	cg16211959			127067952	127068075	NC_000012.11
cg14757492	1.35e-18	7.07e-21	-10.817	36.8349	-0.157	cg14757492	COPE;DDX49;COPE;COPE	NM_007263;NM_019070;NM_199444;NM_199442	19029194	19029317	NC_000019.9
cg05256172	1.35e-18	7.07e-21	-10.817	36.8348	-0.0778	cg05256172			26139506	26139629	NC_000002.11
cg05719818	1.36e-18	7.09e-21	-10.8165	36.8313	-0.222	cg05719818	ABLIM2;ABLIM2;ABLIM2;ABLIM2;ABLIM2;ABLIM2;ABLIM2	NM_032432;NM_001130083;NM_001130087;NM_001130088;NM_001130084;NM_001130085;NM_001130086	8106273	8106396	NC_000004.11
cg01372107	1.36e-18	7.13e-21	-10.8157	36.8268	-0.248	cg01372107	PTPRN2;PTPRN2;PTPRN2	NM_002847;NM_130842;NM_130843	157352978	157353101	NC_000007.13
cg12139873	1.36e-18	7.14e-21	-10.8155	36.8252	-0.0696	cg12139873			151397889	151398012	NC_000002.11
cg04923845	1.37e-18	7.15e-21	-10.8151	36.823	-0.218	cg04923845	VTI1A	NM_145206	114575681	114575804	NC_000010.10
cg17890044	1.37e-18	7.17e-21	-10.8248	36.8227	-0.222	cg17890044	PRDM16;PRDM16	NM_022114;NM_199454	2994372	2994495	NC_000001.10
cg01757760	1.37e-18	7.17e-21	-10.8148	36.8212	-0.0745	cg01757760			16816500	16816623	NC_000003.11
ch.12.1023240F	1.38e-18	7.24e-21	-10.8133	36.8113	-0.14	ch.12.1023240F	LIMA1;LIMA1	NM_001113546;NM_016357	50635579	50635702	NC_000012.11
cg09871424	1.39e-18	7.3e-21	-10.812	36.8036	-0.219	cg09871424	PBX1	NM_002585	164811491	164811614	NC_000001.10
cg24707098	1.4e-18	7.37e-21	-10.8104	36.7937	-0.0699	cg24707098			222149723	222149846	NC_000001.10
cg13020518	1.41e-18	7.41e-21	-10.8096	36.7887	-0.173	cg13020518			49575834	49575957	NC_000022.10
cg18006480	1.41e-18	7.43e-21	-10.8092	36.7858	-0.0678	cg18006480	MS4A12;MS4A12	NM_001164470;NM_017716	60258907	60259030	NC_000011.9
cg25493276	1.42e-18	7.46e-21	-10.8085	36.7813	-0.226	cg25493276			3855077	3855200	NC_000005.9
ch.7.2864275F	1.42e-18	7.5e-21	-10.8178	36.7794	-0.154	ch.7.2864275F	CREB3L2	NM_194071	137653600	137653723	NC_000007.13
cg16471678	1.42e-18	7.51e-21	-10.8076	36.7757	-0.0718	cg16471678	STK19;STK19;STK19	NM_004197;NM_032454;NR_026717	31944187	31944310	NC_000006.11
cg21282669	1.43e-18	7.54e-21	-10.8069	36.7713	-0.0786	cg21282669			128328563	128328686	NC_000008.10
cg20518942	1.43e-18	7.55e-21	-10.8067	36.7703	-0.0844	cg20518942	SH3PXD2A	NM_014631	105366942	105367065	NC_000010.10
cg07095347	1.43e-18	7.57e-21	-10.8062	36.7671	-0.238	cg07095347			133253256	133253379	NC_000006.11
cg04110105	1.44e-18	7.59e-21	-10.8057	36.7641	-0.196	cg04110105	CCR2;CCR2;CCR2;CCR2	NM_001123041;NM_001123396;NM_001123041;NM_001123396	46395356	46395479	NC_000003.11
cg18528124	1.44e-18	7.63e-21	-10.805	36.7595	-0.13	cg18528124	CNTN5;CNTN5	NM_014361;NM_175566	100156776	100156899	NC_000011.9
cg22517653	1.45e-18	7.65e-21	-10.8046	36.757	-0.22	cg22517653			2918612	2918735	NC_000001.10
cg07364657	1.45e-18	7.66e-21	-10.8043	36.7554	-0.197	cg07364657			97376970	97377093	NC_000008.10
cg15092239	1.46e-18	7.72e-21	-10.8032	36.7485	-0.22	cg15092239	CLRN3	NM_152311	129678749	129678872	NC_000010.10
cg17940162	1.47e-18	7.76e-21	-10.8022	36.7424	-0.179	cg17940162			107457102	107457225	NC_000013.10
cg13700148	1.47e-18	7.78e-21	-10.8019	36.7404	-0.228	cg13700148			63043422	63043545	NC_000007.13
cg12178431	1.48e-18	7.83e-21	-10.8009	36.7338	-0.208	cg12178431	FGD5	NM_152536	14860764	14860887	NC_000003.11
cg04352763	1.48e-18	7.85e-21	-10.8004	36.7312	-0.144	cg04352763	EPHB1	NM_004441	134634602	134634725	NC_000003.11
cg06470727	1.48e-18	7.85e-21	-10.8004	36.7311	-0.214	cg06470727	OTOF	NM_194248	26723062	26723185	NC_000002.11
cg21325485	1.48e-18	7.86e-21	-10.8003	36.7306	-0.131	cg21325485	PTPRN2;PTPRN2;PTPRN2	NM_002847;NM_130842;NM_130843	158364932	158365055	NC_000007.13
cg21158561	1.49e-18	7.91e-21	-10.7993	36.7239	-0.11	cg21158561			81178149	81178272	NC_000008.10
cg11677966	1.49e-18	7.92e-21	-10.7991	36.7225	-0.236	cg11677966			63226793	63226916	NC_000007.13
cg00716716	1.5e-18	7.98e-21	-10.8078	36.7171	-0.178	cg00716716	IKZF3;IKZF3;IKZF3;IKZF3;IKZF3;IKZF3	NM_183228;NM_183229;NM_183231;NM_012481;NM_183232;NM_183230	38021651	38021774	NC_000017.10
cg19403269	1.5e-18	7.99e-21	-10.7976	36.7135	-0.218	cg19403269			5569798	5569921	NC_000001.10
cg12768145	1.51e-18	8.04e-21	-10.7966	36.7074	-0.168	cg12768145	CAMK1D;CAMK1D	NM_020397;NM_153498	12839595	12839718	NC_000010.10
cg10227024	1.52e-18	8.08e-21	-10.796	36.7033	-0.2	cg10227024	SHISA6	NM_207386	11234662	11234785	NC_000017.10
cg07453778	1.52e-18	8.1e-21	-10.7955	36.7006	-0.252	cg07453778			91325155	91325278	NC_000006.11
cg16993754	1.53e-18	8.15e-21	-10.7947	36.695	-0.215	cg16993754	CARD11	NM_032415	3020282	3020405	NC_000007.13
cg09105683	1.53e-18	8.18e-21	-10.794	36.6907	-0.197	cg09105683			178799709	178799832	NC_000005.9
cg18113637	1.54e-18	8.2e-21	-10.7936	36.6884	-0.0848	cg18113637	NSUN6	NM_182543	18875548	18875671	NC_000010.10
cg10483817	1.54e-18	8.23e-21	-10.793	36.6848	-0.1	cg10483817	STOX1;STOX1;STOX1;STOX1;STOX1	NM_001130162;NM_001130160;NM_152709;NM_001130161;NM_001130159	70627816	70627939	NC_000010.10
cg05468243	1.55e-18	8.31e-21	-10.7915	36.6756	-0.0744	cg05468243	ACLY;ACLY	NM_001096;NM_198830	40032027	40032150	NC_000017.10
cg07136759	1.56e-18	8.34e-21	-10.7909	36.6718	-0.0892	cg07136759	FAM66C	NR_026788	8336589	8336712	NC_000012.11
cg08247552	1.56e-18	8.36e-21	-10.7906	36.6695	-0.201	cg08247552			1264090	1264213	NC_000008.10
cg08968445	1.57e-18	8.4e-21	-10.7897	36.6642	-0.12	cg08968445			144166472	144166595	NC_000008.10
cg12987403	1.57e-18	8.42e-21	-10.7895	36.6627	-0.226	cg12987403	NMNAT3	NM_178177	139387129	139387252	NC_000003.11
cg13558090	1.59e-18	8.52e-21	-10.7875	36.6503	-0.24	cg13558090			53155107	53155230	NC_000007.13
cg25968437	1.59e-18	8.53e-21	-10.7873	36.649	-0.244	cg25968437			33819738	33819861	NC_000006.11
cg18053492	1.61e-18	8.66e-21	-10.785	36.6347	-0.0955	cg18053492			28115494	28115617	NC_000004.11
cg03051880	1.62e-18	8.69e-21	-10.7844	36.631	-0.212	cg03051880	MAN1A1	NM_005907	119662024	119662147	NC_000006.11
cg17309074	1.63e-18	8.76e-21	-10.7832	36.6232	-0.0949	cg17309074			80166298	80166421	NC_000004.11
cg10076479	1.63e-18	8.77e-21	-10.7831	36.6226	-0.2	cg10076479			4703864	4703987	NC_000002.11
cg07141237	1.64e-18	8.81e-21	-10.7823	36.6176	-0.141	cg07141237			85762574	85762697	NC_000005.9
cg05577548	1.65e-18	8.89e-21	-10.7809	36.6089	-0.282	cg05577548	SHANK2	NM_012309	70666748	70666871	NC_000011.9
cg27476881	1.65e-18	8.92e-21	-10.7803	36.6052	-0.0634	cg27476881	COG5;COG5;COG5	NM_006348;NM_001161520;NM_181733	107148409	107148532	NC_000007.13
cg15503081	1.67e-18	9e-21	-10.7789	36.5967	-0.206	cg15503081	DNASE2	NM_001375	12992867	12992990	NC_000019.9
cg26015163	1.67e-18	9.01e-21	-10.7788	36.596	-0.211	cg26015163			37838311	37838434	NC_000013.10
cg03018931	1.68e-18	9.09e-21	-10.7873	36.5894	-0.205	cg03018931			98629206	98629329	NC_000014.8
cg18644793	1.68e-18	9.09e-21	-10.7773	36.5863	-0.236	cg18644793			2896778	2896901	NC_000001.10
cg01474140	1.68e-18	9.1e-21	-10.7772	36.5861	-0.0802	cg01474140			28516690	28516813	NC_000004.11
cg01048810	1.71e-18	9.25e-21	-10.7745	36.5691	-0.168	cg01048810	C1orf228	NM_001145636	45142815	45142938	NC_000001.10
cg14429209	1.73e-18	9.36e-21	-10.7727	36.5582	-0.188	cg14429209	GAD2;GAD2	NM_001134366;NM_000818	26509505	26509628	NC_000010.10
cg26213224	1.76e-18	9.54e-21	-10.7696	36.5388	-0.169	cg26213224	EGFR	NM_005228	55254659	55254782	NC_000007.13
cg00183546	1.77e-18	9.63e-21	-10.7683	36.5303	-0.0746	cg00183546	RNF216;RNF216	NM_207111;NM_207116	5776279	5776402	NC_000007.13
cg14382249	1.78e-18	9.66e-21	-10.7678	36.527	-0.226	cg14382249			816777	816900	NC_000002.11
cg24862984	1.8e-18	9.81e-21	-10.7653	36.5119	-0.265	cg24862984	PTPRN2;PTPRN2;PTPRN2	NM_002847;NM_130842;NM_130843	158076302	158076425	NC_000007.13
cg22093306	1.81e-18	9.86e-21	-10.7645	36.5067	-0.165	cg22093306	LOC254559	NR_015411	89939509	89939632	NC_000015.9
cg04921646	1.83e-18	9.99e-21	-10.7625	36.494	-0.198	cg04921646			2851502	2851625	NC_000001.10
cg06830064	1.83e-18	9.99e-21	-10.7624	36.4934	-0.185	cg06830064	SOX11;SOX11	NM_003108;NM_003108	5838258	5838381	NC_000002.11
cg24018174	1.83e-18	1e-20	-10.7621	36.4917	-0.253	cg24018174			39748803	39748926	NC_000021.8
cg18034533	1.83e-18	1e-20	-10.7621	36.4914	-0.105	cg18034533			61503989	61504112	NC_000010.10
cg12032198	1.84e-18	1e-20	-10.7616	36.4884	-0.206	cg12032198			157264516	157264639	NC_000007.13
cg21236663	1.85e-18	1.01e-20	-10.7608	36.4833	-0.11	cg21236663			98617309	98617432	NC_000008.10
ch.2.3109681F	1.86e-18	1.02e-20	-10.7597	36.4767	-0.146	ch.2.3109681F			151457313	151457436	NC_000002.11
cg06650256	1.87e-18	1.02e-20	-10.7588	36.4708	-0.133	cg06650256	CD300LB	NM_174892	72527724	72527847	NC_000017.10
cg21720999	1.87e-18	1.03e-20	-10.758	36.4662	-0.0801	cg21720999			51874331	51874454	NC_000007.13
cg11305792	1.87e-18	1.03e-20	-10.758	36.4658	-0.0496	cg11305792			64075651	64075774	NC_000008.10
cg09408951	1.91e-18	1.05e-20	-10.755	36.4472	-0.0922	cg09408951			187673731	187673854	NC_000001.10
cg24604127	1.91e-18	1.05e-20	-10.7547	36.4452	-0.263	cg24604127	PTPRN2;PTPRN2;PTPRN2	NM_002847;NM_130842;NM_130843	157886926	157887049	NC_000007.13
cg01226963	1.93e-18	1.06e-20	-10.7528	36.4336	-0.286	cg01226963			1051814	1051937	NC_000008.10
cg16893868	1.93e-18	1.06e-20	-10.7524	36.4312	-0.218	cg16893868	LILRA2;LILRA2	NM_001130917;NM_006866	55084269	55084392	NC_000019.9
cg09067610	1.94e-18	1.07e-20	-10.7523	36.4303	-0.0808	cg09067610			192956323	192956446	NC_000001.10
cg05014660	1.94e-18	1.07e-20	-10.7521	36.4292	-0.19	cg05014660	PARVG;PARVG;PARVG;PARVG;PARVG;PARVG	NR_024426;NM_001137605;NR_024427;NM_022141;NM_001137606;NR_024428	44576654	44576777	NC_000022.10
cg08208598	1.94e-18	1.07e-20	-10.7521	36.429	-0.0726	cg08208598			71085229	71085352	NC_000013.10
cg17193040	1.95e-18	1.08e-20	-10.7508	36.4208	-0.214	cg17193040			168817299	168817422	NC_000006.11
cg05938197	1.95e-18	1.08e-20	-10.7506	36.4198	-0.202	cg05938197	HESRG;CACNA2D3	NR_027122;NM_018398	54674405	54674528	NC_000003.11
cg00970435	1.97e-18	1.09e-20	-10.7492	36.4112	-0.213	cg00970435	ARSG	NM_014960	66380327	66380450	NC_000017.10
cg24046434	1.99e-18	1.1e-20	-10.7674	36.4049	-0.0751	cg24046434			156459306	156459429	NC_000003.11
cg05303739	1.99e-18	1.1e-20	-10.7476	36.401	-0.0955	cg05303739			22240394	22240517	NC_000017.10
cg06179179	1.99e-18	1.1e-20	-10.7472	36.3988	-0.232	cg06179179	MIR595;PTPRN2;PTPRN2;PTPRN2	NR_030325;NM_002847;NM_130842;NM_130843	158326758	158326881	NC_000007.13
cg18321138	1.99e-18	1.1e-20	-10.7472	36.3985	-0.0961	cg18321138			228161436	228161559	NC_000001.10
cg15812222	1.99e-18	1.1e-20	-10.7471	36.3978	-0.125	cg15812222			57184678	57184801	NC_000008.10
ch.10.5920188R	2.01e-18	1.12e-20	-10.7451	36.3854	-0.0945	ch.10.5920188R			5880182	5880305	NC_000010.10
cg24364535	2.01e-18	1.12e-20	-10.7451	36.3853	-0.264	cg24364535	OPCML	NM_001012393	133098499	133098622	NC_000011.9
cg05081006	2.02e-18	1.12e-20	-10.7449	36.3845	-0.0915	cg05081006			23701184	23701307	NC_000014.8
cg13134763	2.03e-18	1.13e-20	-10.7435	36.3756	-0.271	cg13134763	SNTG2	NM_018968	983306	983429	NC_000002.11
cg26315667	2.07e-18	1.15e-20	-10.7405	36.3569	-0.185	cg26315667	MYT1L	NM_015025	1943663	1943786	NC_000002.11
cg00688620	2.07e-18	1.15e-20	-10.7402	36.3546	-0.22	cg00688620			6246051	6246174	NC_000004.11
cg06483559	2.07e-18	1.15e-20	-10.7398	36.3525	-0.22	cg06483559	OR6X1	NM_001005188	123624914	123625037	NC_000011.9
cg13916500	2.1e-18	1.17e-20	-10.7379	36.3407	-0.0741	cg13916500	AKAP2;PALM2-AKAP2;PALM2-AKAP2	NM_001004065;NM_147150;NM_007203	112860247	112860370	NC_000009.11
cg10673328	2.11e-18	1.17e-20	-10.7372	36.3364	-0.203	cg10673328	DEFB107A;DEFB107B	NM_001037668;NM_001040705	7671497	7671620	NC_000008.10
cg10791541	2.11e-18	1.17e-20	-10.7372	36.336	-0.233	cg10791541	CACNA2D3	NM_018398	55040617	55040740	NC_000003.11
cg03864479	2.17e-18	1.21e-20	-10.7319	36.3031	-0.219	cg03864479	LIFR;LIFR	NM_001127671;NM_002310	38534081	38534204	NC_000005.9
cg05162802	2.19e-18	1.22e-20	-10.7309	36.2966	-0.0783	cg05162802			146533323	146533446	NC_000001.10
cg12037916	2.19e-18	1.22e-20	-10.7307	36.2959	-0.0928	cg12037916			64880608	64880731	NC_000001.10
cg17157205	2.21e-18	1.23e-20	-10.729	36.2851	-0.183	cg17157205			129698012	129698135	NC_000002.11
cg00790672	2.22e-18	1.24e-20	-10.7283	36.2805	-0.215	cg00790672	PRDM16;PRDM16	NM_022114;NM_199454	3324671	3324794	NC_000001.10
cg22114991	2.22e-18	1.24e-20	-10.7282	36.2799	-0.23	cg22114991			68162874	68162997	NC_000007.13
cg00233633	2.23e-18	1.24e-20	-10.7278	36.2773	-0.257	cg00233633	CPVL;CPVL	NM_031311;NM_019029	29153560	29153683	NC_000007.13
cg17182446	2.24e-18	1.26e-20	-10.7264	36.2686	-0.0597	cg17182446	MS4A12;MS4A12	NM_001164470;NM_017716	60258919	60259042	NC_000011.9
cg18384614	2.25e-18	1.26e-20	-10.7258	36.2653	-0.181	cg18384614			5647132	5647255	NC_000002.11
cg26306437	2.27e-18	1.27e-20	-10.724	36.2536	-0.237	cg26306437	CST7;CST7	NM_003650;NM_003650	24930041	24930164	NC_000020.10
cg13556934	2.28e-18	1.28e-20	-10.7234	36.2502	-0.212	cg13556934			179553141	179553264	NC_000001.10
cg27078893	2.28e-18	1.28e-20	-10.7233	36.2495	-0.0452	cg27078893	CLEC4E	NM_014358	8694216	8694339	NC_000012.11
cg10205585	2.28e-18	1.28e-20	-10.7232	36.249	-0.111	cg10205585	REXO1L2P	NR_003594	86567383	86567506	NC_000008.10
cg25133376	2.29e-18	1.28e-20	-10.7229	36.2469	-0.193	cg25133376			73392981	73393104	NC_000007.13
cg00526273	2.29e-18	1.29e-20	-10.7226	36.2453	-0.174	cg00526273	CDH4	NM_001794	59864749	59864872	NC_000020.10
cg17752270	2.3e-18	1.29e-20	-10.7219	36.2406	-0.225	cg17752270	LCP2	NM_005565	169706238	169706361	NC_000005.9
cg10555519	2.32e-18	1.3e-20	-10.7203	36.2308	-0.169	cg10555519			6888133	6888256	NC_000007.13
cg20167216	2.32e-18	1.31e-20	-10.7201	36.2296	-0.208	cg20167216			142353463	142353586	NC_000007.13
ch.6.3866157F	2.33e-18	1.31e-20	-10.7195	36.2255	-0.122	ch.6.3866157F			3921158	3921281	NC_000006.11
cg24798153	2.34e-18	1.31e-20	-10.7192	36.2236	-0.0546	cg24798153			38821875	38821998	NC_000005.9
cg25595381	2.37e-18	1.33e-20	-10.717	36.2099	-0.2	cg25595381			134648115	134648238	NC_000010.10
cg18688704	2.37e-18	1.34e-20	-10.7166	36.2078	-0.195	cg18688704	PDGFC	NM_016205	157889520	157889643	NC_000004.11
cg26275110	2.37e-18	1.34e-20	-10.7163	36.206	-0.173	cg26275110	SLC22A11	NM_018484	64329426	64329549	NC_000011.9
cg19441992	2.38e-18	1.34e-20	-10.7161	36.2043	-0.221	cg19441992			1568007	1568130	NC_000002.11
cg16016640	2.39e-18	1.35e-20	-10.7148	36.1963	-0.217	cg16016640			170418412	170418535	NC_000006.11
cg13547132	2.41e-18	1.36e-20	-10.7134	36.1874	-0.212	cg13547132			2835258	2835381	NC_000001.10
cg01049678	2.43e-18	1.38e-20	-10.7119	36.178	-0.24	cg01049678	GIMAP8	NM_175571	150147536	150147659	NC_000007.13
cg23867673	2.45e-18	1.39e-20	-10.7108	36.1715	-0.184	cg23867673	CDH23;CDH23	NM_052836;NM_022124	73404170	73404293	NC_000010.10
cg16966139	2.45e-18	1.39e-20	-10.7105	36.1692	-0.212	cg16966139	LOC441897	NR_029429	111933757	111933880	NC_000001.10
cg15435485	2.5e-18	1.42e-20	-10.7074	36.1501	-0.157	cg15435485			7882164	7882287	NC_000008.10
cg26233218	2.5e-18	1.42e-20	-10.7071	36.1484	-0.235	cg26233218	PTPRN2;PTPRN2;PTPRN2	NM_002847;NM_130842;NM_130843	157626309	157626432	NC_000007.13
cg15339075	2.5e-18	1.42e-20	-10.707	36.1477	-0.215	cg15339075	PARK2;PARK2;PARK2	NM_004562;NM_013987;NM_013988	162259067	162259190	NC_000006.11
cg12311651	2.52e-18	1.43e-20	-10.7059	36.1407	-0.158	cg12311651			94207115	94207238	NC_000015.9
cg06738560	2.52e-18	1.43e-20	-10.7058	36.1405	-0.0621	cg06738560			72214332	72214455	NC_000011.9
cg10132197	2.52e-18	1.43e-20	-10.7057	36.1393	-0.0673	cg10132197			57273048	57273171	NC_000012.11
cg19407717	2.52e-18	1.43e-20	-10.7055	36.1381	-0.195	cg19407717	TPO;TPO;TPO;TPO	NM_175719;NM_000547;NM_175721;NM_175722	1544120	1544243	NC_000002.11
cg02394226	2.53e-18	1.44e-20	-10.7049	36.1348	-0.0846	cg02394226			140695173	140695296	NC_000006.11
cg25285053	2.54e-18	1.45e-20	-10.7041	36.1296	-0.201	cg25285053	GPR31	NM_005299	167571630	167571753	NC_000006.11
cg20783453	2.55e-18	1.45e-20	-10.7035	36.1259	-0.0954	cg20783453	C13orf35	NM_207440	113332841	113332964	NC_000013.10
ch.4.77087090F	2.59e-18	1.48e-20	-10.7006	36.1079	-0.0539	ch.4.77087090F			76868066	76868189	NC_000004.11
cg00791422	2.59e-18	1.48e-20	-10.7005	36.1072	-0.0361	cg00791422			46372842	46372965	NC_000006.11
cg02358456	2.6e-18	1.48e-20	-10.7001	36.1044	-0.102	cg02358456			4167048	4167171	NC_000004.11
cg08414888	2.61e-18	1.49e-20	-10.6994	36.1001	-0.2	cg08414888	PTPRN2;PTPRN2;PTPRN2	NM_002847;NM_130842;NM_130843	157738287	157738410	NC_000007.13
ch.1.89724558F	2.62e-18	1.49e-20	-10.699	36.0975	-0.143	ch.1.89724558F			89951970	89952093	NC_000001.10
ch.2.200609314R	2.62e-18	1.5e-20	-10.6984	36.0943	-0.11	ch.2.200609314R			200901069	200901192	NC_000002.11
cg18744355	2.63e-18	1.5e-20	-10.6981	36.0923	-0.209	cg18744355	MYT1L	NM_015025	1906949	1907072	NC_000002.11
cg15144817	2.63e-18	1.5e-20	-10.6981	36.092	-0.0935	cg15144817	FGF14	NM_175929	102720926	102721049	NC_000013.10
cg20998127	2.64e-18	1.51e-20	-10.6972	36.0867	-0.237	cg20998127	VIPR2	NM_003382	158859224	158859347	NC_000007.13
cg07454108	2.65e-18	1.52e-20	-10.6964	36.0814	-0.109	cg07454108	KCNN2;KCNN2;KCNN2	NM_170775;NM_021614;NM_170775	113769362	113769485	NC_000005.9
cg07826516	2.68e-18	1.54e-20	-10.6942	36.0678	-0.228	cg07826516			3106230	3106353	NC_000005.9
cg12976883	2.7e-18	1.55e-20	-10.6931	36.0612	-0.222	cg12976883	SP140;SP140	NM_001005176;NM_007237	231090376	231090499	NC_000002.11
cg10485638	2.71e-18	1.56e-20	-10.6923	36.0561	-0.119	cg10485638			1858360	1858483	NC_000005.9
cg26554834	2.72e-18	1.56e-20	-10.692	36.0539	-0.254	cg26554834	PTPRN2;PTPRN2;PTPRN2	NM_002847;NM_130842;NM_130843	157932314	157932437	NC_000007.13
cg14872762	2.72e-18	1.56e-20	-10.6917	36.0521	-0.192	cg14872762	OPCML	NM_001012393	133399769	133399892	NC_000011.9
cg00884445	2.72e-18	1.56e-20	-10.6916	36.0517	-0.0718	cg00884445	VWA3B	NM_144992	98755852	98755975	NC_000002.11
cg14720354	2.72e-18	1.57e-20	-10.6913	36.0497	-0.0833	cg14720354			5314644	5314767	NC_000011.9
cg12964019	2.72e-18	1.57e-20	-10.6913	36.0496	-0.0929	cg12964019			22493930	22494053	NC_000013.10
cg12597422	2.76e-18	1.59e-20	-10.6892	36.0363	-0.0686	cg12597422	DOCK7	NM_033407	63136405	63136528	NC_000001.10
cg08575819	2.77e-18	1.6e-20	-10.6982	36.0342	-0.153	cg08575819	C6orf27	NM_025258	31740291	31740414	NC_000006.11
cg23403895	2.78e-18	1.6e-20	-10.6878	36.0277	-0.188	cg23403895	PALLD;PALLD	NM_016081;NM_001166108	169533552	169533675	NC_000004.11
cg27564445	2.78e-18	1.6e-20	-10.6876	36.0267	-0.0845	cg27564445			14861076	14861199	NC_000012.11
cg08185105	2.81e-18	1.62e-20	-10.6857	36.015	-0.202	cg08185105			92031986	92032109	NC_000002.11
cg05220280	2.83e-18	1.63e-20	-10.6849	36.0096	-0.169	cg05220280	SDK1;SDK1	NR_027816;NM_152744	4304397	4304520	NC_000007.13
cg08080735	2.83e-18	1.63e-20	-10.6847	36.0085	-0.185	cg08080735	FOXP1;FOXP1	NM_032682;NM_001012505	71505823	71505946	NC_000003.11
cg16562486	2.84e-18	1.64e-20	-10.6839	36.0034	-0.216	cg16562486			2925740	2925863	NC_000001.10
cg18099070	2.87e-18	1.66e-20	-10.6821	35.992	-0.261	cg18099070	PTPRN2;PTPRN2;PTPRN2	NM_002847;NM_130842;NM_130843	157845265	157845388	NC_000007.13
cg22965561	2.88e-18	1.67e-20	-10.6817	35.9896	-0.22	cg22965561			13046134	13046257	NC_000010.10
cg04336561	2.88e-18	1.67e-20	-10.6814	35.9878	-0.238	cg04336561	PTPRN2;PTPRN2;PTPRN2	NM_002847;NM_130842;NM_130843	157548939	157549062	NC_000007.13
cg09200593	2.9e-18	1.68e-20	-10.6806	35.9828	-0.0545	cg09200593			119590451	119590574	NC_000007.13
cg00251678	2.9e-18	1.68e-20	-10.6805	35.9824	-0.192	cg00251678	PRDM16;PRDM16	NM_022114;NM_199454	3305629	3305752	NC_000001.10
cg00974255	2.9e-18	1.68e-20	-10.6801	35.9796	-0.192	cg00974255			35082656	35082779	NC_000017.10
cg22357679	2.9e-18	1.68e-20	-10.6799	35.9789	-0.254	cg22357679	SORCS2	NM_020777	7486772	7486895	NC_000004.11
cg22088368	2.91e-18	1.69e-20	-10.6797	35.9771	-0.198	cg22088368	C22orf33;C22orf33	NM_178552;NM_001163857	37404888	37405011	NC_000022.10
cg23416593	2.93e-18	1.7e-20	-10.6879	35.9703	-0.196	cg23416593			3890909	3891032	NC_000005.9
cg07071615	2.93e-18	1.7e-20	-10.6782	35.9682	-0.21	cg07071615			106214478	106214601	NC_000014.8
cg05696969	2.94e-18	1.7e-20	-10.678	35.967	-0.221	cg05696969	SH3RF2	NM_152550	145326228	145326351	NC_000005.9
cg18779296	2.95e-18	1.71e-20	-10.6773	35.9625	-0.195	cg18779296			41878119	41878242	NC_000004.11
cg10495572	2.95e-18	1.71e-20	-10.6771	35.9614	-0.187	cg10495572			66911193	66911316	NC_000001.10
cg12914511	2.96e-18	1.72e-20	-10.6766	35.9578	-0.244	cg12914511	PTPRN2;PTPRN2;PTPRN2	NM_002847;NM_130842;NM_130843	157447781	157447904	NC_000007.13
cg09972405	3e-18	1.74e-20	-10.6745	35.9448	-0.22	cg09972405	MYT1L	NM_015025	2193665	2193788	NC_000002.11
cg25813290	3e-18	1.74e-20	-10.6744	35.9442	-0.175	cg25813290			108767676	108767799	NC_000007.13
cg02517294	3e-18	1.75e-20	-10.674	35.9417	-0.0877	cg02517294	SDHA	NM_004168	242791	242914	NC_000005.9
cg12228704	3.01e-18	1.76e-20	-10.6831	35.9401	-0.132	cg12228704			132898592	132898715	NC_000004.11
cg26689077	3.01e-18	1.76e-20	-10.6733	35.9374	-0.246	cg26689077	ITGB7	NM_000889	53599806	53599929	NC_000012.11
cg00490097	3.02e-18	1.76e-20	-10.6729	35.9349	-0.153	cg00490097	HCCA2;KRTAP5-6	NM_053005;NM_001012416	1718586	1718709	NC_000011.9
cg17035513	3.03e-18	1.77e-20	-10.6724	35.9318	-0.0569	cg17035513			102617881	102618004	NC_000006.11
cg01704698	3.04e-18	1.77e-20	-10.6718	35.9279	-0.228	cg01704698	CRISPLD2	NM_031476	84941294	84941417	NC_000016.9
cg12032650	3.04e-18	1.77e-20	-10.6717	35.9274	-0.216	cg12032650			73864404	73864527	NC_000007.13
cg08292569	3.05e-18	1.78e-20	-10.6709	35.9227	-0.178	cg08292569	TNFRSF10A	NM_003844	23078059	23078182	NC_000008.10
cg17976824	3.08e-18	1.8e-20	-10.6693	35.9126	-0.0762	cg17976824			83028143	83028266	NC_000011.9
cg09305815	3.09e-18	1.8e-20	-10.669	35.9106	-0.22	cg09305815			5376320	5376443	NC_000002.11
ch.7.93764192R	3.09e-18	1.81e-20	-10.6688	35.9094	-0.203	ch.7.93764192R			93926256	93926379	NC_000007.13
cg12592815	3.09e-18	1.81e-20	-10.6687	35.9089	-0.219	cg12592815	SDK1;SDK1	NR_027816;NM_152744	4300306	4300429	NC_000007.13
cg12591668	3.09e-18	1.81e-20	-10.6686	35.9082	-0.237	cg12591668			192520335	192520458	NC_000001.10
cg26430588	3.11e-18	1.82e-20	-10.6674	35.9006	-0.115	cg26430588			75412866	75412989	NC_000003.11
cg24038255	3.11e-18	1.82e-20	-10.6672	35.8997	-0.205	cg24038255	MRGPRG;C11orf36	NM_001164377;NR_027138	3240399	3240522	NC_000011.9
cg15648444	3.16e-18	1.85e-20	-10.6647	35.8836	-0.0614	cg15648444	STK3	NM_006281	99602609	99602732	NC_000008.10
cg20930329	3.16e-18	1.86e-20	-10.6643	35.8811	-0.156	cg20930329			106109749	106109872	NC_000014.8
cg14174583	3.16e-18	1.86e-20	-10.6642	35.8808	-0.148	cg14174583	SNTG2	NM_018968	1051469	1051592	NC_000002.11
cg10439896	3.16e-18	1.86e-20	-10.6642	35.8806	-0.151	cg10439896			144154986	144155109	NC_000008.10
cg04063166	3.17e-18	1.86e-20	-10.664	35.8797	-0.23	cg04063166	KCNA4	NM_002233	30034452	30034575	NC_000011.9
cg12440728	3.18e-18	1.87e-20	-10.663	35.8731	-0.0663	cg12440728	RIPK1	NM_003804	3097028	3097151	NC_000006.11
cg00287773	3.19e-18	1.88e-20	-10.6628	35.8719	-0.217	cg00287773	C5orf32	NM_032412	139594619	139594742	NC_000005.9
cg14582691	3.2e-18	1.89e-20	-10.662	35.8668	-0.209	cg14582691	PTPRN2;PTPRN2;PTPRN2	NM_002847;NM_130842;NM_130843	157695026	157695149	NC_000007.13
cg23498518	3.21e-18	1.89e-20	-10.6614	35.8631	-0.223	cg23498518	POM121L12;POM121L12	NM_182595;NM_182595	53104336	53104459	NC_000007.13
cg26667585	3.24e-18	1.92e-20	-10.6596	35.8519	-0.183	cg26667585			5949290	5949413	NC_000008.10
cg02216780	3.25e-18	1.92e-20	-10.6592	35.8493	-0.203	cg02216780			46497736	46497859	NC_000013.10
cg09512111	3.25e-18	1.92e-20	-10.6592	35.8493	-0.0894	cg09512111			43967630	43967753	NC_000001.10
cg17726575	3.26e-18	1.93e-20	-10.6587	35.8462	-0.235	cg17726575	E2F6;E2F6;E2F6;E2F6;E2F6	NR_003094;NR_003092;NR_003095;NM_198256;NR_003093	11606945	11607068	NC_000002.11
cg02217063	3.26e-18	1.93e-20	-10.6586	35.8455	-0.195	cg02217063	A2BP1;A2BP1	NM_001142333;NM_018723	6348709	6348832	NC_000016.9
cg16291750	3.27e-18	1.94e-20	-10.6675	35.8433	-0.183	cg16291750			18003561	18003684	NC_000003.11
cg10082515	3.27e-18	1.94e-20	-10.6579	35.8412	-0.213	cg10082515			109798776	109798899	NC_000007.13
cg02898539	3.32e-18	1.97e-20	-10.6552	35.8245	-0.213	cg02898539			59599073	59599196	NC_000020.10
cg16707954	3.34e-18	1.98e-20	-10.6546	35.8211	-0.207	cg16707954	OTX2OS1	NR_029385	57365847	57365970	NC_000014.8
cg12689670	3.34e-18	1.98e-20	-10.6544	35.8193	-0.243	cg12689670	LAMC1	NM_002293	183009347	183009470	NC_000001.10
cg23962872	3.35e-18	1.99e-20	-10.6538	35.8158	-0.186	cg23962872			1345372	1345495	NC_000008.10
cg23986375	3.37e-18	2e-20	-10.6528	35.8093	-0.125	cg23986375			144155292	144155415	NC_000008.10
cg15649208	3.39e-18	2.01e-20	-10.6518	35.8032	-0.139	cg15649208			17527430	17527553	NC_000005.9
cg05492735	3.41e-18	2.02e-20	-10.6509	35.7976	-0.298	cg05492735	LHFPL3	NM_199000	104445402	104445525	NC_000007.13
cg17338146	3.41e-18	2.03e-20	-10.66	35.7969	-0.233	cg17338146			147142856	147142979	NC_000002.11
cg23468678	3.41e-18	2.03e-20	-10.6508	35.7969	-0.0663	cg23468678			66703010	66703133	NC_000003.11
cg11183156	3.42e-18	2.03e-20	-10.6598	35.7956	-0.245	cg11183156	LGALS12;LGALS12;LGALS12;LGALS12;LGALS12;LGALS12	NM_001142535;NM_033101;NM_033101;NM_001142535;NM_001142536;NM_001142536	63273543	63273666	NC_000011.9
cg03511031	3.42e-18	2.03e-20	-10.6502	35.7937	-0.2	cg03511031	PTPRN2;PTPRN2;PTPRN2	NM_002847;NM_130842;NM_130843	157460477	157460600	NC_000007.13
cg07997387	3.42e-18	2.03e-20	-10.6502	35.7936	-0.0885	cg07997387			100279885	100280008	NC_000011.9
cg00191458	3.48e-18	2.07e-20	-10.647	35.7733	-0.211	cg00191458	LOC257358	NR_026945	169757859	169757982	NC_000005.9
cg16110704	3.48e-18	2.08e-20	-10.6468	35.7719	-0.228	cg16110704			242224772	242224895	NC_000001.10
cg22770560	3.5e-18	2.09e-20	-10.6458	35.7662	-0.228	cg22770560	PTPRN2;PTPRN2;PTPRN2	NM_002847;NM_130842;NM_130843	157345452	157345575	NC_000007.13
cg07491199	3.51e-18	2.09e-20	-10.6457	35.7652	-0.183	cg07491199	PTPRN2;PTPRN2;PTPRN2	NM_002847;NM_130842;NM_130843	157643734	157643857	NC_000007.13
cg16762794	3.51e-18	2.09e-20	-10.6455	35.7639	-0.153	cg16762794			7404876	7404999	NC_000008.10
cg17590224	3.52e-18	2.1e-20	-10.6447	35.7591	-0.0991	cg17590224			70142461	70142584	NC_000006.11
cg03082523	3.55e-18	2.12e-20	-10.6433	35.7502	-0.215	cg03082523	PRDM16;PRDM16	NM_022114;NM_199454	3155965	3156088	NC_000001.10
cg14462017	3.57e-18	2.14e-20	-10.6423	35.7442	-0.183	cg14462017	SYT4	NM_020783	40853833	40853956	NC_000018.9
cg23791011	3.58e-18	2.14e-20	-10.6421	35.7427	-0.214	cg23791011	HTRA1	NM_002775	124219564	124219687	NC_000010.10
cg17291423	3.59e-18	2.15e-20	-10.6412	35.7376	-0.245	cg17291423	PTPRN2;PTPRN2;PTPRN2	NM_002847;NM_130842;NM_130843	158263204	158263327	NC_000007.13
cg24045038	3.62e-18	2.17e-20	-10.6399	35.7294	-0.278	cg24045038			155867845	155867968	NC_000007.13
cg18788413	3.65e-18	2.19e-20	-10.6385	35.7202	-0.155	cg18788413			7873305	7873428	NC_000008.10
cg05169812	3.66e-18	2.19e-20	-10.6382	35.7187	-0.101	cg05169812			56880815	56880938	NC_000007.13
cg04093885	3.69e-18	2.21e-20	-10.6465	35.7127	-0.153	cg04093885	ISCA1L	NM_001080540	62074261	62074384	NC_000005.9
cg12363682	3.72e-18	2.23e-20	-10.6355	35.7018	-0.185	cg12363682	GRM6	NM_000843	178420690	178420813	NC_000005.9
cg08296665	3.72e-18	2.23e-20	-10.6352	35.7	-0.233	cg08296665			113000032	113000155	NC_000013.10
cg01717010	3.73e-18	2.24e-20	-10.6347	35.6968	-0.115	cg01717010			77082115	77082238	NC_000008.10
cg23808337	3.74e-18	2.25e-20	-10.6344	35.6949	-0.225	cg23808337	PTPRN2;PTPRN2;PTPRN2	NM_002847;NM_130842;NM_130843	158267402	158267525	NC_000007.13
cg01055129	3.75e-18	2.25e-20	-10.634	35.6923	-0.133	cg01055129	FAM66D;USP17L2	NR_027425;NM_201402	11996358	11996481	NC_000008.10
cg16474725	3.75e-18	2.25e-20	-10.6339	35.6917	-0.198	cg16474725	CLIC5;CLIC5	NM_001114086;NM_016929	45979349	45979472	NC_000006.11
cg10901383	3.77e-18	2.27e-20	-10.633	35.686	-0.2	cg10901383	TAC3	NM_013251	57406900	57407023	NC_000012.11
cg17017746	3.77e-18	2.27e-20	-10.6329	35.6858	-0.201	cg17017746	TAS1R2	NM_152232	19183907	19184030	NC_000001.10
cg11157172	3.82e-18	2.3e-20	-10.6305	35.6703	-0.236	cg11157172	PRDM16;PRDM16	NM_022114;NM_199454	3210417	3210540	NC_000001.10
cg05582979	3.82e-18	2.31e-20	-10.6303	35.6691	-0.217	cg05582979	CLNK	NM_052964	10686610	10686733	NC_000004.11
cg04041568	3.82e-18	2.31e-20	-10.6303	35.6691	-0.223	cg04041568			132979486	132979609	NC_000012.11
cg19802390	3.83e-18	2.31e-20	-10.6296	35.6651	-0.287	cg19802390			2840177	2840300	NC_000001.10
cg11224946	3.85e-18	2.32e-20	-10.6291	35.6618	-0.185	cg11224946	MEGF6	NM_001409	3487867	3487990	NC_000001.10
cg01119169	3.86e-18	2.33e-20	-10.6284	35.6575	-0.244	cg01119169	MIR485;MIR453;MIR668	NR_030160;NR_029969;NR_030408	101521603	101521726	NC_000014.8
cg00418071	3.89e-18	2.35e-20	-10.627	35.6487	-0.145	cg00418071			86073001	86073124	NC_000001.10
cg02627227	3.89e-18	2.36e-20	-10.6269	35.6481	-0.201	cg02627227	AGPAT4	NM_020133	161664638	161664761	NC_000006.11
cg17475857	3.96e-18	2.4e-20	-10.6336	35.6322	-0.182	cg17475857	DNMT3B;DNMT3B;DNMT3B;DNMT3B	NM_175849;NM_006892;NM_175850;NM_175848	31366466	31366589	NC_000020.10
cg23228019	3.96e-18	2.4e-20	-10.624	35.6298	-0.151	cg23228019			46579870	46579993	NC_000020.10
cg21886089	3.97e-18	2.4e-20	-10.6237	35.628	-0.197	cg21886089	WBSCR17	NM_022479	71079734	71079857	NC_000007.13
cg23354510	3.99e-18	2.42e-20	-10.6227	35.6219	-0.134	cg23354510	LOC257358	NR_026945	169757430	169757553	NC_000005.9
cg18195238	3.99e-18	2.42e-20	-10.6226	35.6214	-0.179	cg18195238			64681840	64681963	NC_000008.10
cg07088430	4e-18	2.42e-20	-10.6223	35.6196	-0.0774	cg07088430			74214957	74215080	NC_000013.10
cg16558846	4e-18	2.43e-20	-10.622	35.6175	-0.184	cg16558846			106373308	106373431	NC_000014.8
cg11439695	4e-18	2.43e-20	-10.6219	35.6171	-0.212	cg11439695	CACNA1C;CACNA1C;CACNA1C;CACNA1C;CACNA1C;CACNA1C;CACNA1C;CACNA1C;CACNA1C;CACNA1C;CACNA1C;CACNA1C;CACNA1C;CACNA1C;CACNA1C;CACNA1C;CACNA1C;CACNA1C;CACNA1C;CACNA1C;CACNA1C;CACNA1C;CACNA1C	NM_001129844;NM_001129827;NM_001129839;NM_001129834;NM_001129841;NM_000719;NM_001129830;NM_001167625;NM_001129843;NM_001167624;NM_001129835;NM_001129837;NM_001167623;NM_001129840;NM_199460;NM_001129833;NM_001129832;NM_001129829;NM_001129846;NM_001129836;NM_001129838;NM_001129831;NM_001129842	2561024	2561147	NC_000012.11
cg19270409	4.04e-18	2.45e-20	-10.6206	35.6088	-0.212	cg19270409			1430753	1430876	NC_000008.10
cg24787823	4.04e-18	2.45e-20	-10.6205	35.6085	-0.231	cg24787823	UNC5D	NM_080872	35613299	35613422	NC_000008.10
cg11367260	4.06e-18	2.47e-20	-10.6192	35.6002	-0.237	cg11367260			132684529	132684652	NC_000010.10
cg00531054	4.08e-18	2.49e-20	-10.6184	35.5949	-0.0743	cg00531054	RFWD2;RFWD2	NM_022457;NM_001001740	175961559	175961682	NC_000001.10
cg27377610	4.08e-18	2.49e-20	-10.6183	35.5946	-0.192	cg27377610			143204891	143205014	NC_000007.13
cg14258031	4.15e-18	2.53e-20	-10.6154	35.5762	-0.17	cg14258031	PTPRD;PTPRD;PTPRD;PTPRD;PTPRD;PTPRD	NM_130391;NM_130392;NM_130393;NM_001040712;NM_002839;NM_001171025	8711763	8711886	NC_000009.11
cg04336859	4.16e-18	2.54e-20	-10.6151	35.5747	-0.186	cg04336859	SIGLEC12	NM_053003	52005153	52005276	NC_000019.9
cg15379511	4.17e-18	2.55e-20	-10.6144	35.5703	-0.0801	cg15379511			74607143	74607266	NC_000017.10
cg06999791	4.18e-18	2.56e-20	-10.614	35.5675	-0.0574	cg06999791			52982342	52982465	NC_000013.10
cg20431848	4.18e-18	2.56e-20	-10.6138	35.5664	-0.272	cg20431848			11931819	11931942	NC_000005.9
cg11339964	4.18e-18	2.56e-20	-10.6137	35.5659	-0.249	cg11339964	FBXL7	NM_012304	15645642	15645765	NC_000005.9
cg09652526	4.19e-18	2.57e-20	-10.6133	35.5633	-0.181	cg09652526	ZNF831	NM_178457	57833352	57833475	NC_000020.10
cg21510549	4.21e-18	2.58e-20	-10.6124	35.558	-0.203	cg21510549	PDE6B;PDE6B	NM_000283;NM_001145291	642885	643008	NC_000004.11
cg13976988	4.22e-18	2.58e-20	-10.6122	35.5568	-0.216	cg13976988			38607402	38607525	NC_000005.9
cg24561305	4.24e-18	2.6e-20	-10.6112	35.5502	-0.212	cg24561305			29149132	29149255	NC_000013.10
cg27188056	4.26e-18	2.61e-20	-10.6105	35.5457	-0.148	cg27188056	NLRP12	NM_144687	54327847	54327970	NC_000019.9
cg24769849	4.26e-18	2.61e-20	-10.6104	35.5456	-0.231	cg24769849	JAKMIP1;JAKMIP1	NM_144720;NM_001099433	6072170	6072293	NC_000004.11
cg08403691	4.27e-18	2.62e-20	-10.6099	35.5423	-0.0925	cg08403691	RAB3IP;RAB3IP;RAB3IP;RAB3IP;RAB3IP	NM_175625;NM_175624;NM_022456;NM_175623;NM_001024647	70201359	70201482	NC_000012.11
cg13523068	4.27e-18	2.63e-20	-10.6097	35.541	-0.107	cg13523068			239685567	239685690	NC_000002.11
cg24069602	4.29e-18	2.64e-20	-10.609	35.5364	-0.194	cg24069602	SCN4A	NM_000334	62045522	62045645	NC_000017.10
cg24914661	4.33e-18	2.66e-20	-10.6077	35.5283	-0.154	cg24914661			2654049	2654172	NC_000002.11
cg06856840	4.36e-18	2.68e-20	-10.6061	35.5188	-0.227	cg06856840	FAH	NM_000137	80446451	80446574	NC_000015.9
cg26859593	4.44e-18	2.73e-20	-10.6034	35.5014	-0.243	cg26859593			112996532	112996655	NC_000013.10
cg16532262	4.44e-18	2.74e-20	-10.6031	35.4997	-0.216	cg16532262	KRT3	NM_057088	53190908	53191031	NC_000012.11
cg23095043	4.5e-18	2.77e-20	-10.6011	35.4874	-0.0624	cg23095043			82602288	82602411	NC_000001.10
cg02845204	4.5e-18	2.77e-20	-10.6011	35.4872	-0.225	cg02845204	KRTAP5-9	NM_005553	71259439	71259562	NC_000011.9
cg22295925	4.51e-18	2.78e-20	-10.6008	35.4853	-0.163	cg22295925			99153795	99153918	NC_000015.9
cg01669186	4.55e-18	2.81e-20	-10.599	35.4741	-0.212	cg01669186	ANO9	NM_001012302	430919	431042	NC_000011.9
cg05509777	4.58e-18	2.83e-20	-10.5981	35.4684	-0.235	cg05509777	C11orf21;TSPAN32;C11orf21	NR_024621;NM_139022;NM_001142946	2322517	2322640	NC_000011.9
cg22531685	4.61e-18	2.85e-20	-10.5969	35.4614	-0.195	cg22531685	PTPRN2;PTPRN2;PTPRN2	NM_002847;NM_130842;NM_130843	158264663	158264786	NC_000007.13
cg11054192	4.64e-18	2.87e-20	-10.5957	35.4539	-0.183	cg11054192	RIMBP2	NM_015347	130892525	130892648	NC_000012.11
cg04509221	4.64e-18	2.87e-20	-10.5955	35.4527	-0.221	cg04509221	PRDM16;PRDM16	NM_022114;NM_199454	3155312	3155435	NC_000001.10
cg07717559	4.69e-18	2.9e-20	-10.5939	35.4425	-0.202	cg07717559	RAP1GAP2;RAP1GAP2	NM_001100398;NM_015085	2699021	2699144	NC_000017.10
cg04114723	4.69e-18	2.9e-20	-10.5939	35.4425	-0.0937	cg04114723			56219864	56219987	NC_000017.10
cg09066883	4.7e-18	2.91e-20	-10.5933	35.439	-0.238	cg09066883	PTPRN2;PTPRN2;PTPRN2	NM_002847;NM_130842;NM_130843	157932951	157933074	NC_000007.13
cg25667028	4.73e-18	2.93e-20	-10.5923	35.4323	-0.127	cg25667028			137805405	137805528	NC_000008.10
cg01329495	4.73e-18	2.93e-20	-10.592	35.431	-0.122	cg01329495			147161322	147161445	NC_000002.11
cg06347582	4.74e-18	2.94e-20	-10.5919	35.4301	-0.162	cg06347582			2829700	2829823	NC_000001.10
cg21955916	4.79e-18	2.97e-20	-10.5901	35.419	-0.146	cg21955916	LILRB2;LILRB2	NM_001080978;NM_005874	54785127	54785250	NC_000019.9
cg12723251	4.82e-18	2.99e-20	-10.5984	35.4136	-0.188	cg12723251	GALNT2	NM_004481	230414987	230415110	NC_000001.10
cg04745004	4.82e-18	3e-20	-10.5887	35.4099	-0.213	cg04745004	OPCML	NM_001012393	133286631	133286754	NC_000011.9
ch.7.67314344F	4.83e-18	3e-20	-10.5885	35.4087	-0.102	ch.7.67314344F			67676909	67677032	NC_000007.13
cg09558000	4.88e-18	3.04e-20	-10.5866	35.3971	-0.196	cg09558000	TFCP2L1	NM_014553	121991892	121992015	NC_000002.11
cg02361493	4.88e-18	3.04e-20	-10.5865	35.3967	-0.212	cg02361493			131164500	131164623	NC_000012.11
ch.9.98936572R	4.89e-18	3.05e-20	-10.5861	35.3941	-0.0541	ch.9.98936572R			99896751	99896874	NC_000009.11
cg02586212	4.9e-18	3.05e-20	-10.5857	35.3917	-0.273	cg02586212	RGS1;RGS1	NM_002922;NM_002922	192544902	192545025	NC_000001.10
cg13566919	4.93e-18	3.07e-20	-10.5847	35.3853	-0.217	cg13566919	GZMA	NM_006144	54397821	54397944	NC_000005.9
cg02236554	4.94e-18	3.08e-20	-10.5843	35.3825	-0.233	cg02236554			2672718	2672841	NC_000002.11
cg10572807	4.97e-18	3.11e-20	-10.5831	35.3753	-0.178	cg10572807	PRDM16;PRDM16	NM_022114;NM_199454	2999586	2999709	NC_000001.10
cg01078332	4.98e-18	3.11e-20	-10.5829	35.3743	-0.189	cg01078332	SLC6A1	NM_003042	11033246	11033369	NC_000003.11
cg20543426	4.99e-18	3.12e-20	-10.5826	35.3722	-0.22	cg20543426	ERC2	NM_015576	55581094	55581217	NC_000003.11
cg03361379	4.99e-18	3.12e-20	-10.5824	35.371	-0.213	cg03361379	PTPRN2;PTPRN2;MIR153-2;PTPRN2	NM_002847;NM_130842;NR_029689;NM_130843	157367159	157367282	NC_000007.13
cg21959598	5.04e-18	3.15e-20	-10.5901	35.3627	-0.172	cg21959598	VOPP1	NM_030796	55637719	55637842	NC_000007.13
cg02693345	5.03e-18	3.15e-20	-10.581	35.3621	-0.0931	cg02693345			33488641	33488764	NC_000003.11
cg09121055	5.05e-18	3.16e-20	-10.5803	35.3579	-0.0674	cg09121055			165941348	165941471	NC_000004.11
cg15238831	5.06e-18	3.17e-20	-10.58	35.3559	-0.15	cg15238831	GLT1D1	NM_144669	129422257	129422380	NC_000012.11
cg15440376	5.12e-18	3.21e-20	-10.5781	35.3438	-0.242	cg15440376			188101115	188101238	NC_000004.11
cg08029287	5.21e-18	3.27e-20	-10.5748	35.3238	-0.178	cg08029287			1503238	1503361	NC_000004.11
cg13769658	5.25e-18	3.3e-20	-10.5831	35.3186	-0.0879	cg13769658	SNAPC3	NM_001039697	15442613	15442736	NC_000009.11
cg08679238	5.25e-18	3.3e-20	-10.5737	35.3166	-0.23	cg08679238	CCRL2;CCRL2;CCRL2	NM_001130910;NM_003965;NM_001130910	46449100	46449223	NC_000003.11
cg00832199	5.26e-18	3.31e-20	-10.5732	35.3138	-0.138	cg00832199	CXCR1	NM_000634	219030006	219030129	NC_000002.11
cg13658713	5.28e-18	3.32e-20	-10.582	35.3121	-0.181	cg13658713	NTM	NM_001048209	131335180	131335303	NC_000011.9
cg23618179	5.27e-18	3.31e-20	-10.5729	35.3118	-0.0766	cg23618179			14746308	14746431	NC_000001.10
cg06125762	5.28e-18	3.32e-20	-10.5726	35.3096	-0.115	cg06125762			76319232	76319355	NC_000011.9
cg06440169	5.3e-18	3.34e-20	-10.5717	35.3042	-0.0847	cg06440169			60010823	60010946	NC_000016.9
cg23710823	5.32e-18	3.35e-20	-10.5711	35.3002	-0.162	cg23710823	P704P	NM_001145442	20020657	20020780	NC_000014.8
cg00096106	5.33e-18	3.36e-20	-10.5706	35.2973	-0.166	cg00096106	ST8SIA4	NM_005668	100176809	100176932	NC_000005.9
cg26076793	5.35e-18	3.38e-20	-10.5699	35.2932	-0.202	cg26076793	UBE2QL1	NM_001145161	6452065	6452188	NC_000005.9
cg15135773	5.38e-18	3.4e-20	-10.5689	35.2865	-0.238	cg15135773	SDK1;SDK1	NR_027816;NM_152744	4308372	4308495	NC_000007.13
cg04736562	5.43e-18	3.43e-20	-10.5675	35.2782	-0.119	cg04736562	VENTX	NM_014468	135055156	135055279	NC_000010.10
cg05189730	5.43e-18	3.43e-20	-10.5672	35.2765	-0.168	cg05189730			132583721	132583844	NC_000010.10
cg04859102	5.45e-18	3.45e-20	-10.5666	35.2725	-0.181	cg04859102			31527893	31528016	NC_000006.11
cg24347611	5.49e-18	3.48e-20	-10.5653	35.2643	-0.182	cg24347611			92611305	92611428	NC_000008.10
cg14228980	5.49e-18	3.48e-20	-10.5652	35.264	-0.253	cg14228980	EIF4A3	NM_014740	78122221	78122344	NC_000017.10
cg04383979	5.5e-18	3.48e-20	-10.5649	35.2622	-0.253	cg04383979	A2BP1;A2BP1	NM_001142333;NM_018723	6692245	6692368	NC_000016.9
cg19746375	5.5e-18	3.49e-20	-10.5647	35.2605	-0.23	cg19746375	PTPRN2;PTPRN2;PTPRN2	NM_002847;NM_130842;NM_130843	157394661	157394784	NC_000007.13
cg00852534	5.53e-18	3.51e-20	-10.5733	35.2578	-0.203	cg00852534	TTBK1	NM_032538	43212858	43212981	NC_000006.11
cg07536737	5.54e-18	3.52e-20	-10.5635	35.253	-0.201	cg07536737			98630091	98630214	NC_000002.11
cg15322455	5.54e-18	3.52e-20	-10.5635	35.2529	-0.214	cg15322455			1358274	1358397	NC_000007.13
cg01356611	5.59e-18	3.55e-20	-10.5618	35.2426	-0.122	cg01356611	SNAR-C5;SNAR-C2;SNAR-C1	NR_024219;NR_024217;NR_024220	48431097	48431220	NC_000019.9
cg06217314	5.65e-18	3.6e-20	-10.5599	35.2308	-0.165	cg06217314	SCAND3	NM_052923	28543693	28543816	NC_000006.11
cg16794961	5.69e-18	3.62e-20	-10.5682	35.2262	-0.215	cg16794961			5882032	5882155	NC_000002.11
cg15001714	5.69e-18	3.63e-20	-10.568	35.2251	-0.18	cg15001714			48459813	48459936	NC_000001.10
cg10102302	5.69e-18	3.62e-20	-10.5587	35.2232	-0.0759	cg10102302			59969032	59969155	NC_000011.9
cg06393830	5.7e-18	3.64e-20	-10.5581	35.2199	-0.175	cg06393830			31527889	31528012	NC_000006.11
cg18171890	5.71e-18	3.64e-20	-10.558	35.2192	-0.159	cg18171890			46989989	46990112	NC_000010.10
cg10657228	5.72e-18	3.65e-20	-10.5577	35.2168	-0.211	cg10657228	T-SP1	NM_198464	10386222	10386345	NC_000008.10
cg10132694	5.72e-18	3.65e-20	-10.5576	35.2163	-0.193	cg10132694	LAIR1;LAIR1	NM_021706;NM_002287	54876752	54876875	NC_000019.9
cg09649198	5.72e-18	3.65e-20	-10.5576	35.2162	-0.122	cg09649198	PTPRN2;PTPRN2;PTPRN2	NM_002847;NM_130842;NM_130843	158134520	158134643	NC_000007.13
cg13229345	5.73e-18	3.66e-20	-10.5573	35.2143	-0.159	cg13229345			187984633	187984756	NC_000004.11
cg04291970	5.74e-18	3.67e-20	-10.5566	35.2104	-0.191	cg04291970	C8orf12	NR_026814	11226339	11226462	NC_000008.10
cg03341377	5.79e-18	3.7e-20	-10.5553	35.2023	-0.164	cg03341377	CX3CR1;CX3CR1;CX3CR1;CX3CR1	NM_001171174;NM_001171171;NM_001337;NM_001171172	39309355	39309478	NC_000003.11
cg25644224	5.79e-18	3.7e-20	-10.5552	35.2015	-0.18	cg25644224	PTPRN2;PTPRN2;PTPRN2	NM_002847;NM_130842;NM_130843	158195876	158195999	NC_000007.13
cg22426139	5.8e-18	3.71e-20	-10.555	35.2001	-0.133	cg22426139	PRAMEF12	NM_001080830	12837410	12837533	NC_000001.10
cg15948245	5.81e-18	3.72e-20	-10.5547	35.1981	-0.0691	cg15948245			104581746	104581869	NC_000007.13
cg15068357	5.85e-18	3.75e-20	-10.5722	35.1944	-0.138	cg15068357	SMOC2;SMOC2	NM_022138;NM_001166412	169012253	169012376	NC_000006.11
cg06639073	5.84e-18	3.74e-20	-10.5536	35.1918	-0.0778	cg06639073			175930468	175930591	NC_000003.11
cg14785579	5.85e-18	3.75e-20	-10.5533	35.1899	-0.198	cg14785579			75402432	75402555	NC_000018.9
cg08453903	5.85e-18	3.75e-20	-10.5531	35.1884	-0.205	cg08453903			71688187	71688310	NC_000017.10
cg02561693	5.86e-18	3.76e-20	-10.5528	35.1865	-0.233	cg02561693			4931074	4931197	NC_000002.11
ch.2.204909450R	5.91e-18	3.79e-20	-10.5514	35.178	-0.174	ch.2.204909450R			205201205	205201328	NC_000002.11
cg05789250	5.96e-18	3.82e-20	-10.5502	35.1703	-0.133	cg05789250	C6orf48;C6orf48;SNORD52	NM_001040437;NM_001040438;NR_002742	31804306	31804429	NC_000006.11
cg01852522	5.98e-18	3.84e-20	-10.5495	35.1661	-0.252	cg01852522	GALNT9;GALNT9	NM_001122636;NM_021808	132686912	132687035	NC_000012.11
cg07281325	6e-18	3.86e-20	-10.5488	35.1618	-0.182	cg07281325			47430821	47430944	NC_000021.8
cg24937136	6.06e-18	3.9e-20	-10.5472	35.1514	-0.19	cg24937136	PARP1	NM_001618	226593346	226593469	NC_000001.10
cg06835018	6.1e-18	3.93e-20	-10.5459	35.1437	-0.148	cg06835018			12272982	12273105	NC_000008.10
cg00588689	6.12e-18	3.94e-20	-10.5453	35.1398	-0.241	cg00588689			117374408	117374531	NC_000004.11
cg12722337	6.19e-18	3.99e-20	-10.5434	35.1281	-0.207	cg12722337			143085750	143085873	NC_000008.10
cg12144446	6.23e-18	4.02e-20	-10.5423	35.1211	-0.216	cg12144446			163704718	163704841	NC_000004.11
cg00174713	6.23e-18	4.02e-20	-10.5422	35.1209	-0.151	cg00174713	MAGI1;MAGI1;MAGI1	NM_015520;NM_001033057;NM_004742	65538667	65538790	NC_000003.11
cg04486725	6.23e-18	4.02e-20	-10.5422	35.1203	-0.199	cg04486725	EPB41L4A	NM_022140	111702260	111702383	NC_000005.9
cg22674388	6.24e-18	4.03e-20	-10.5417	35.1173	-0.0746	cg22674388			101411812	101411935	NC_000003.11
cg16705546	6.27e-18	4.06e-20	-10.5408	35.112	-0.206	cg16705546	IRF8	NM_002163	85936666	85936789	NC_000016.9
cg14779825	6.29e-18	4.07e-20	-10.5498	35.1116	-0.204	cg14779825	CEACAM8	NM_001816	43099845	43099968	NC_000019.9
cg11944139	6.29e-18	4.07e-20	-10.5497	35.1111	-0.214	cg11944139	JAKMIP3	NM_001105521	133957543	133957666	NC_000010.10
cg02677286	6.37e-18	4.13e-20	-10.5381	35.095	-0.279	cg02677286			1051703	1051826	NC_000008.10
cg01436254	6.37e-18	4.13e-20	-10.5381	35.0948	-0.187	cg01436254	CD86;CD86	NM_006889;NM_175862	121796580	121796703	NC_000003.11
cg12072262	6.4e-18	4.15e-20	-10.5372	35.0894	-0.202	cg12072262			129379353	129379476	NC_000010.10
cg03848421	6.4e-18	4.15e-20	-10.5371	35.0885	-0.197	cg03848421			98508050	98508173	NC_000010.10
cg06469726	6.45e-18	4.19e-20	-10.5358	35.081	-0.181	cg06469726			242483467	242483590	NC_000002.11
cg09356916	6.45e-18	4.19e-20	-10.5358	35.0806	-0.202	cg09356916			23791473	23791596	NC_000004.11
cg20303033	6.45e-18	4.19e-20	-10.5357	35.0804	-0.139	cg20303033	LOC440910	NR_030728	132043874	132043997	NC_000002.11
cg22757535	6.48e-18	4.21e-20	-10.5347	35.0742	-0.212	cg22757535			237418897	237419020	NC_000002.11
cg05198938	6.49e-18	4.22e-20	-10.5347	35.0737	-0.163	cg05198938	LOC388692	NR_027002	149278358	149278481	NC_000001.10
cg17899889	6.49e-18	4.22e-20	-10.5346	35.0732	-0.209	cg17899889			4191180	4191303	NC_000001.10
cg17546215	6.51e-18	4.24e-20	-10.5338	35.0683	-0.232	cg17546215			70577170	70577293	NC_000007.13
cg02850452	6.52e-18	4.25e-20	-10.5335	35.0665	-0.217	cg02850452	PTPRN2;PTPRN2;PTPRN2	NM_002847;NM_130842;NM_130843	157354054	157354177	NC_000007.13
cg14884183	6.54e-18	4.26e-20	-10.5424	35.0657	-0.151	cg14884183	LOC389634	NR_024420	8541476	8541599	NC_000012.11
cg09251328	6.57e-18	4.28e-20	-10.5324	35.0593	-0.127	cg09251328	OAZ3;OAZ3	NM_001134939;NM_016178	151741997	151742120	NC_000001.10
cg07012484	6.59e-18	4.29e-20	-10.5318	35.0559	-0.232	cg07012484	RCSD1	NM_052862	167619748	167619871	NC_000001.10
cg27572269	6.6e-18	4.3e-20	-10.5315	35.054	-0.0632	cg27572269	ZNF605;ZNF605	NM_183238;NM_001164715	133516572	133516695	NC_000012.11
cg16110400	6.61e-18	4.31e-20	-10.5312	35.0522	-0.094	cg16110400			106188289	106188412	NC_000011.9
cg06370886	6.62e-18	4.32e-20	-10.5309	35.0502	-0.0646	cg06370886	EYS	NM_001142800	64742105	64742228	NC_000006.11
cg01766850	6.69e-18	4.37e-20	-10.529	35.0386	-0.193	cg01766850			170580966	170581089	NC_000006.11
cg08796342	6.74e-18	4.41e-20	-10.5277	35.0305	-0.229	cg08796342	TC2N	NM_001128596	92334029	92334152	NC_000014.8
cg02931464	6.75e-18	4.41e-20	-10.5275	35.029	-0.188	cg02931464			121826303	121826426	NC_000012.11
cg14725924	6.75e-18	4.42e-20	-10.5274	35.0282	-0.194	cg14725924			6411956	6412079	NC_000005.9
cg00552087	6.82e-18	4.46e-20	-10.5257	35.0178	-0.266	cg00552087	CSMD1	NM_033225	3316893	3317016	NC_000008.10
cg18484309	6.84e-18	4.48e-20	-10.5252	35.0148	-0.186	cg18484309			137505269	137505392	NC_000003.11
cg10966661	6.84e-18	4.48e-20	-10.5252	35.0145	-0.104	cg10966661			134910774	134910897	NC_000011.9
cg08901578	6.84e-18	4.48e-20	-10.525	35.0138	-0.123	cg08901578			187885870	187885993	NC_000004.11
cg14775690	6.87e-18	4.5e-20	-10.5243	35.0093	-0.0843	cg14775690			16642625	16642748	NC_000008.10
cg24485927	6.89e-18	4.52e-20	-10.5238	35.0061	-0.207	cg24485927			795989	796112	NC_000002.11
cg01329005	6.89e-18	4.52e-20	-10.5237	35.0056	-0.227	cg01329005	BST2	NM_004335	17516712	17516835	NC_000019.9
cg24348240	6.89e-18	4.52e-20	-10.5237	35.0052	-0.247	cg24348240	UBXN11;UBXN11;UBXN11	NM_001077262;NM_145345;NM_183008	26611453	26611576	NC_000001.10
cg11806813	6.95e-18	4.56e-20	-10.5222	34.9959	-0.109	cg11806813			38284642	38284765	NC_000010.10
cg09387992	6.97e-18	4.58e-20	-10.5214	34.9914	-0.0418	cg09387992			103497121	103497244	NC_000008.10
cg00112341	6.98e-18	4.59e-20	-10.5213	34.9903	-0.206	cg00112341	ERC2	NM_015576	55991024	55991147	NC_000003.11
cg03283235	6.99e-18	4.6e-20	-10.521	34.9885	-0.22	cg03283235	TMEM132D	NM_133448	130354828	130354951	NC_000012.11
cg17430979	7e-18	4.61e-20	-10.5207	34.9866	-0.219	cg17430979	JAKMIP1	NM_001099433	6034828	6034951	NC_000004.11
cg19895324	7.04e-18	4.63e-20	-10.5198	34.9812	-0.195	cg19895324			133318072	133318195	NC_000010.10
cg08560734	7.05e-18	4.64e-20	-10.5194	34.9785	-0.17	cg08560734	COL23A1	NM_173465	177929948	177930071	NC_000005.9
cg18284875	7.08e-18	4.66e-20	-10.5187	34.9744	-0.189	cg18284875	PTPRN2;PTPRN2;PTPRN2	NM_002847;NM_130842;NM_130843	157777033	157777156	NC_000007.13
cg19716414	7.09e-18	4.67e-20	-10.5185	34.9728	-0.161	cg19716414	POTEE	NM_001083538	131976236	131976359	NC_000002.11
cg19618601	7.09e-18	4.67e-20	-10.5184	34.9727	-0.189	cg19618601			6644914	6645037	NC_000002.11
cg01313422	7.12e-18	4.69e-20	-10.5178	34.9686	-0.0592	cg01313422	STARD13	NM_178006	33816249	33816372	NC_000013.10
cg12805984	7.12e-18	4.69e-20	-10.5177	34.9683	-0.135	cg12805984			116249516	116249639	NC_000006.11
cg22007110	7.12e-18	4.7e-20	-10.5176	34.9673	-0.22	cg22007110			30737599	30737722	NC_000007.13
cg27644733	7.2e-18	4.75e-20	-10.5158	34.9561	-0.225	cg27644733	GRIN2A;GRIN2A;GRIN2A	NM_001134407;NM_000833;NM_001134408	9857216	9857339	NC_000016.9
cg01464186	7.28e-18	4.81e-20	-10.5138	34.944	-0.211	cg01464186	SGMS1	NM_147156	52191661	52191784	NC_000010.10
cg25774608	7.34e-18	4.86e-20	-10.5122	34.9339	-0.213	cg25774608			6250507	6250630	NC_000012.11
cg14646983	7.34e-18	4.86e-20	-10.5122	34.9338	-0.16	cg14646983			34602974	34603097	NC_000009.11
cg20098854	7.36e-18	4.88e-20	-10.5117	34.9306	-0.231	cg20098854			898407	898530	NC_000008.10
cg03750478	7.36e-18	4.88e-20	-10.5116	34.9302	-0.184	cg03750478	C16orf54	NM_175900	29757375	29757498	NC_000016.9
cg10039047	7.52e-18	4.98e-20	-10.5082	34.9091	-0.151	cg10039047	B3GNTL1	NM_001009905	80922528	80922651	NC_000017.10
cg04009108	7.52e-18	4.99e-20	-10.5081	34.9086	-0.153	cg04009108			7406299	7406422	NC_000008.10
cg04789315	7.52e-18	4.99e-20	-10.5081	34.9081	-0.218	cg04789315			140505028	140505151	NC_000002.11
cg11785980	7.52e-18	4.99e-20	-10.508	34.908	-0.24	cg11785980			131122979	131123102	NC_000012.11
cg16162122	7.55e-18	5.01e-20	-10.5073	34.9035	-0.202	cg16162122	KCNQ2;KCNQ2;KCNQ2;KCNQ2;KCNQ2	NM_172108;NM_172106;NM_172107;NM_172109;NM_004518	62090270	62090393	NC_000020.10
cg20663831	7.55e-18	5.02e-20	-10.5071	34.9024	-0.248	cg20663831	GIMAP2	NM_015660	150383154	150383277	NC_000007.13
cg03661929	7.55e-18	5.02e-20	-10.5071	34.9019	-0.201	cg03661929			116503715	116503838	NC_000003.11
cg02609279	7.61e-18	5.06e-20	-10.5058	34.8943	-0.223	cg02609279	ITGA4	NM_000885	182325952	182326075	NC_000002.11
cg09674627	7.62e-18	5.07e-20	-10.5056	34.8928	-0.165	cg09674627	PPP2R2C	NM_020416	6470947	6471070	NC_000004.11
ch.19.50335620F	7.62e-18	5.07e-20	-10.5054	34.8916	-0.159	ch.19.50335620F			45643780	45643903	NC_000019.9
cg15167836	7.73e-18	5.15e-20	-10.503	34.8766	-0.12	cg15167836			86564548	86564671	NC_000008.10
ch.16.97779F	7.74e-18	5.15e-20	-10.5029	34.8759	-0.129	ch.16.97779F	CRAMP1L	NM_020825	1711947	1712070	NC_000016.9
cg02637654	7.74e-18	5.15e-20	-10.5029	34.8758	-0.155	cg02637654	SLC16A14	NM_152527	230934329	230934452	NC_000002.11
cg15536663	7.74e-18	5.16e-20	-10.5026	34.8743	-0.245	cg15536663	EPB41L4A	NM_022140	111665548	111665671	NC_000005.9
cg08586426	7.76e-18	5.17e-20	-10.5023	34.8724	-0.283	cg08586426	LMO2	NM_005574	33915315	33915438	NC_000011.9
cg06995113	7.78e-18	5.19e-20	-10.5017	34.8686	-0.0723	cg06995113			161654020	161654143	NC_000002.11
cg18507365	7.91e-18	5.28e-20	-10.5082	34.8537	-0.209	cg18507365	KCNMA1;KCNMA1;KCNMA1;KCNMA1	NM_001161353;NM_001161352;NM_002247;NM_001014797	78871502	78871625	NC_000010.10
cg05139472	7.91e-18	5.28e-20	-10.4989	34.8511	-0.0722	cg05139472			140748360	140748483	NC_000002.11
cg00859330	7.92e-18	5.29e-20	-10.4986	34.8493	-0.219	cg00859330	AJAP1;AJAP1	NM_018836;NM_001042478	4835298	4835421	NC_000001.10
cg21251344	7.95e-18	5.31e-20	-10.4981	34.846	-0.125	cg21251344	FAM90A7	NM_001136572	7427792	7427915	NC_000008.10
cg18766483	7.99e-18	5.34e-20	-10.4971	34.8399	-0.216	cg18766483			56435424	56435547	NC_000007.13
cg20010076	7.99e-18	5.35e-20	-10.4971	34.8399	-0.0839	cg20010076			43531719	43531842	NC_000014.8
cg19532617	7.99e-18	5.35e-20	-10.497	34.8396	-0.105	cg19532617			76373607	76373730	NC_000004.11
ch.15.96924465R	8.01e-18	5.36e-20	-10.4965	34.8365	-0.156	ch.15.96924465R			99106942	99107065	NC_000015.9
cg04522374	8.11e-18	5.44e-20	-10.4943	34.8228	-0.066	cg04522374			9501783	9501906	NC_000012.11
cg16248926	8.12e-18	5.44e-20	-10.4943	34.8223	-0.192	cg16248926	VOPP1	NM_030796	55591518	55591641	NC_000007.13
cg17675852	8.19e-18	5.5e-20	-10.5207	34.8187	-0.229	cg17675852			143054785	143054908	NC_000008.10
cg11900210	8.14e-18	5.46e-20	-10.4936	34.8183	-0.185	cg11900210	BRUNOL4;BRUNOL4;BRUNOL4;BRUNOL4	NM_001025088;NM_020180;NM_001025089;NM_001025087	34915648	34915771	NC_000018.9
cg25577497	8.15e-18	5.47e-20	-10.4934	34.817	-0.251	cg25577497	RIMBP2	NM_015347	130937299	130937422	NC_000012.11
cg16937735	8.17e-18	5.49e-20	-10.4929	34.814	-0.217	cg16937735	PTPRN2;PTPRN2;PTPRN2	NM_002847;NM_130842;NM_130843	157562675	157562798	NC_000007.13
cg00286160	8.2e-18	5.51e-20	-10.5014	34.8119	-0.0806	cg00286160			156441122	156441245	NC_000005.9
cg17078629	8.2e-18	5.51e-20	-10.4922	34.8094	-0.171	cg17078629	RTP2;RTP2	NM_001004312;NM_001004312	187419942	187420065	NC_000003.11
cg08621454	8.2e-18	5.51e-20	-10.4922	34.8094	-0.125	cg08621454	FAM66B	NR_027423	7191953	7192076	NC_000008.10
cg01602068	8.22e-18	5.53e-20	-10.4917	34.8063	-0.205	cg01602068	SHANK2	NM_012309	70741376	70741499	NC_000011.9
cg13815495	8.25e-18	5.55e-20	-10.491	34.8023	-0.0914	cg13815495			138864462	138864585	NC_000004.11
cg22374924	8.26e-18	5.56e-20	-10.4909	34.8013	-0.111	cg22374924			5791563	5791686	NC_000001.10
cg12340381	8.27e-18	5.57e-20	-10.4906	34.7999	-0.0822	cg12340381			37824788	37824911	NC_000013.10
cg25326289	8.33e-18	5.62e-20	-10.4893	34.7912	-0.0696	cg25326289			158769805	158769928	NC_000007.13
cg03674660	8.37e-18	5.64e-20	-10.4884	34.7861	-0.155	cg03674660	SMOC2;SMOC2	NM_022138;NM_001166412	168844698	168844821	NC_000006.11
cg25274468	8.4e-18	5.66e-20	-10.4879	34.783	-0.204	cg25274468	MDFIC;MDFIC	NM_199072;NM_001166345	114570498	114570621	NC_000007.13
cg08905487	8.4e-18	5.66e-20	-10.4879	34.7826	-0.177	cg08905487	LAIR2;LAIR2	NM_002288;NM_021270	55013821	55013944	NC_000019.9
cg22578926	8.4e-18	5.67e-20	-10.4877	34.7817	-0.203	cg22578926	PTPRN2;PTPRN2;PTPRN2	NM_002847;NM_130842;NM_130843	157437844	157437967	NC_000007.13
cg06955214	8.44e-18	5.7e-20	-10.4869	34.7768	-0.201	cg06955214	PTPRN2;PTPRN2;PTPRN2	NM_002847;NM_130842;NM_130843	157968683	157968806	NC_000007.13
cg13273136	8.46e-18	5.72e-20	-10.4957	34.7759	-0.182	cg13273136	PSD4;LOC440839;PSD4	NM_012455;NR_029399;NM_012455	113931565	113931688	NC_000002.11
cg12082048	8.53e-18	5.77e-20	-10.485	34.765	-0.176	cg12082048			5576195	5576318	NC_000002.11
cg09755589	8.58e-18	5.8e-20	-10.4841	34.7588	-0.208	cg09755589			166459325	166459448	NC_000001.10
cg05590087	8.6e-18	5.82e-20	-10.4836	34.7562	-0.233	cg05590087			38640041	38640164	NC_000005.9
cg00093433	8.62e-18	5.84e-20	-10.4831	34.7529	-0.213	cg00093433			85981310	85981433	NC_000016.9
cg02387843	8.68e-18	5.88e-20	-10.482	34.7463	-0.23	cg02387843	SLC2A9;SLC2A9	NM_020041;NM_001001290	9892887	9893010	NC_000004.11
cg24724596	8.69e-18	5.89e-20	-10.4818	34.7447	-0.187	cg24724596	LIM2;LIM2	NM_001161748;NM_030657	51892299	51892422	NC_000019.9
cg09297252	8.69e-18	5.89e-20	-10.4818	34.7446	-0.161	cg09297252			7631214	7631337	NC_000008.10
cg26876834	8.7e-18	5.89e-20	-10.4816	34.7434	-0.201	cg26876834	SNHG9;SNORA64;SNORA10;RPS2	NR_003142;NR_002326;NR_002327;NM_002952	2013573	2013696	NC_000016.9
cg11869773	8.77e-18	5.94e-20	-10.4802	34.735	-0.233	cg11869773	MIR299	NR_029841	101489781	101489904	NC_000014.8
cg12049322	8.78e-18	5.96e-20	-10.4798	34.7326	-0.0757	cg12049322			90528566	90528689	NC_000001.10
cg15587018	8.81e-18	5.98e-20	-10.4884	34.7312	-0.0556	cg15587018	SUPT3H;SUPT3H	NM_003599;NM_181356	45143980	45144103	NC_000006.11
cg17338368	8.8e-18	5.97e-20	-10.4794	34.7301	-0.0883	cg17338368			31907252	31907375	NC_000014.8
cg05762612	8.81e-18	5.98e-20	-10.4792	34.7288	-0.195	cg05762612			76260568	76260691	NC_000018.9
cg19771575	8.89e-18	6.05e-20	-10.4775	34.7184	-0.0635	cg19771575			132358037	132358160	NC_000012.11
cg21937152	8.9e-18	6.06e-20	-10.4773	34.7166	-0.063	cg21937152	PARP8	NM_024615	50070402	50070525	NC_000005.9
cg21063275	8.91e-18	6.06e-20	-10.4771	34.7156	-0.164	cg21063275			22466195	22466318	NC_000015.9
cg26671477	8.92e-18	6.07e-20	-10.4768	34.7136	-0.253	cg26671477			121258490	121258613	NC_000001.10
cg07581739	8.95e-18	6.11e-20	-10.4759	34.7083	-0.208	cg07581739	SLC6A18	NM_182632	1232437	1232560	NC_000005.9
cg00676085	8.96e-18	6.11e-20	-10.4758	34.7076	-0.214	cg00676085	KRT72;KRT72;KRT72	NM_080747;NM_001146225;NM_001146226	52991945	52992068	NC_000012.11
cg23452220	8.97e-18	6.12e-20	-10.4755	34.706	-0.188	cg23452220	LDB2;LDB2	NM_001290;NM_001130834	16846297	16846420	NC_000004.11
cg27322975	9.03e-18	6.16e-20	-10.4745	34.6993	-0.0707	cg27322975	LPP;LPP;LPP	NM_005578;NM_001167671;NM_001167672	188354136	188354259	NC_000003.11
cg18773937	9.16e-18	6.26e-20	-10.472	34.6841	-0.149	cg18773937	IL1B	NM_000576	113594611	113594734	NC_000002.11
cg04693423	9.18e-18	6.28e-20	-10.4716	34.6816	-0.102	cg04693423			97583596	97583719	NC_000007.13
cg25617236	9.2e-18	6.29e-20	-10.4712	34.6792	-0.0673	cg25617236			55694210	55694333	NC_000005.9
cg12279125	9.2e-18	6.29e-20	-10.4712	34.6789	-0.182	cg12279125			2129970	2130093	NC_000008.10
cg23531154	9.2e-18	6.3e-20	-10.4711	34.6783	-0.0665	cg23531154	KIAA1217	NM_001098500	24384109	24384232	NC_000010.10
cg04925956	9.24e-18	6.33e-20	-10.4703	34.6734	-0.216	cg04925956	TMEM132D	NM_133448	129785686	129785809	NC_000012.11
cg16932094	9.24e-18	6.33e-20	-10.4703	34.6732	-0.211	cg16932094	PRAME;PRAME;LOC648691;PRAME;PRAME;PRAME	NM_206953;NM_006115;NR_027426;NM_206954;NM_206955;NM_206956	22902237	22902360	NC_000022.10
cg16747885	9.28e-18	6.36e-20	-10.4696	34.6688	-0.161	cg16747885			31551613	31551736	NC_000016.9
cg12155963	9.28e-18	6.36e-20	-10.4695	34.6682	-0.234	cg12155963	GIMAP8	NM_175571	150147553	150147676	NC_000007.13
cg13860309	9.32e-18	6.4e-20	-10.4686	34.6625	-0.107	cg13860309			55873269	55873392	NC_000012.11
cg21959912	9.35e-18	6.42e-20	-10.4681	34.6598	-0.205	cg21959912			62033563	62033686	NC_000020.10
cg17376015	9.41e-18	6.46e-20	-10.467	34.6531	-0.146	cg17376015	HLA-DRB1	NM_002124	32557422	32557545	NC_000006.11
cg16819051	9.41e-18	6.46e-20	-10.4669	34.6525	-0.19	cg16819051			229173235	229173358	NC_000002.11
ch.2.226789810F	9.41e-18	6.47e-20	-10.4669	34.6522	-0.109	ch.2.226789810F			227081566	227081689	NC_000002.11
cg22517607	9.43e-18	6.48e-20	-10.4665	34.6499	-0.101	cg22517607	PPM1D	NM_003620	58691296	58691419	NC_000017.10
cg07380056	9.49e-18	6.52e-20	-10.4655	34.6437	-0.116	cg07380056	GALNT13	NM_052917	155147469	155147592	NC_000002.11
cg19757573	9.56e-18	6.58e-20	-10.4642	34.6356	-0.25	cg19757573	MIR654;MIR376B;MIR376A2;MIR300;MIR376A1	NR_030390;NR_030157;NR_030266;NR_030582;NR_029868	101506246	101506369	NC_000014.8
cg07194984	9.56e-18	6.58e-20	-10.4641	34.6349	-0.17	cg07194984			2128771	2128894	NC_000011.9
cg20491695	9.63e-18	6.63e-20	-10.4629	34.6275	-0.177	cg20491695			45719826	45719949	NC_000011.9
cg18331135	9.94e-18	6.85e-20	-10.4577	34.5951	-0.0543	cg18331135	FSCN3	NM_020369	127232254	127232377	NC_000007.13
ch.1.4512450F	9.99e-18	6.89e-20	-10.4568	34.5894	-0.0875	ch.1.4512450F	URB2	NM_014777	229794078	229794201	NC_000001.10
cg08049592	1e-17	6.92e-20	-10.4562	34.5854	-0.198	cg08049592	AQP12B	NM_001102467	241623436	241623559	NC_000002.11
cg02401589	1.01e-17	6.97e-20	-10.455	34.5783	-0.148	cg02401589	C11orf90	NM_001144871	93584748	93584871	NC_000011.9
cg02318454	1.01e-17	6.98e-20	-10.4547	34.5764	-0.193	cg02318454	CYP11B1;CYP11B1	NM_000497;NM_001026213	143961141	143961264	NC_000008.10
cg12711760	1.01e-17	6.99e-20	-10.4546	34.5757	-0.21	cg12711760	NAV2;NAV2;NAV2;NAV2	NM_182964;NM_001111018;NM_145117;NM_001111019	20132923	20133046	NC_000011.9
cg03543319	1.01e-17	6.99e-20	-10.4544	34.5747	-0.214	cg03543319	PROKR1	NM_138964	68882249	68882372	NC_000002.11
cg03348792	1.01e-17	7.01e-20	-10.454	34.5719	-0.244	cg03348792	KRT1	NM_006121	53075482	53075605	NC_000012.11
cg01970383	1.02e-17	7.05e-20	-10.4716	34.5714	-0.189	cg01970383	COL23A1	NM_173465	177729224	177729347	NC_000005.9
cg23068623	1.02e-17	7.03e-20	-10.4537	34.5702	-0.159	cg23068623			243267966	243268089	NC_000001.10
cg17025560	1.02e-17	7.03e-20	-10.4535	34.5692	-0.216	cg17025560			2936277	2936400	NC_000001.10
cg12899747	1.02e-17	7.05e-20	-10.4531	34.5662	-0.176	cg12899747			25391527	25391650	NC_000003.11
cg05516061	1.02e-17	7.09e-20	-10.4615	34.5639	-0.0979	cg05516061	OR4C45	NM_001005513	48367974	48368097	NC_000011.9
cg12185873	1.02e-17	7.1e-20	-10.4612	34.5623	-0.161	cg12185873			106355821	106355944	NC_000014.8
cg18813545	1.03e-17	7.11e-20	-10.4518	34.5582	-0.199	cg18813545	SRGAP3;SRGAP3	NM_001033117;NM_014850	9167185	9167308	NC_000003.11
cg02940661	1.03e-17	7.12e-20	-10.4516	34.5574	-0.18	cg02940661	KIAA0125	NR_026800	106382755	106382878	NC_000014.8
cg14215369	1.03e-17	7.13e-20	-10.4515	34.5563	-0.141	cg14215369	TMEM132D	NM_133448	129594154	129594277	NC_000012.11
cg20017108	1.03e-17	7.13e-20	-10.4514	34.5558	-0.171	cg20017108	PRAMEF20	NM_001099852	13515991	13516114	NC_000001.10
cg11168293	1.03e-17	7.17e-20	-10.4596	34.5526	-0.217	cg11168293	FAM19A5;FAM19A5	NM_015381;NM_001082967	49067022	49067145	NC_000022.10
cg15386853	1.03e-17	7.16e-20	-10.4507	34.5518	-0.203	cg15386853	PRDM16;PRDM16	NM_022114;NM_199454	3306999	3307122	NC_000001.10
[truncated: 199,116+ more rows]
